# Supplementary material for: Activity-dependent tuning of intrinsic excitability in mouse and human neurogliaform cells
Source: eLife journal article supplement (doi:10.7554/elife.57571), 2020-06-04
Supplement: supp [file elife-57571-supp-v1.zip]

Archive with 17 entries (17 files):
- elife_poa_e57571_Figure_1_figure_supplement_1.pdf
- elife_poa_e57571_Figure_1_figure_supplement_2.pdf
- elife_poa_e57571_Figure_3_figure_supplement_1.pdf
- elife_poa_e57571_Figure_6_figure_supplement_1.pdf
- elife_poa_e57571_Figure_6_figure_supplement_2.pdf
- elife_poa_e57571_Figure_7_figure_supplement_1.pdf
- elife_poa_e57571_Figure_1_source_data_1.xlsx
- elife_poa_e57571_Figure_1_figure_supplement_2_source_data_1.xlsx
- elife_poa_e57571_Figure_2_source_data_1.xlsx
- elife_poa_e57571_Figure_3_source_data_1.xlsx
- elife_poa_e57571_Figure_4_source_data_1.xlsx
- elife_poa_e57571_Figure_5_source_data_1.xlsx
- elife_poa_e57571_Figure_6_source_data_1.xlsx
- elife_poa_e57571_Figure_6_figure_supplement_1_source_data_1.xlsx
- elife_poa_e57571_Figure_7_source_data_1.xlsx
- elife_poa_e57571_Figure_7_figure_supplement_1_source_data_1.xlsx
- elife_poa_e57571_Transparent_Reporting_File.docx
