# Supplementary material for: Activity-dependent tuning of intrinsic excitability in mouse and human neurogliaform cells
Source: eLife journal article supplement (doi:10.7554/elife.57571), 2020-06-04
Supplement: supp [file elife-57571-supp-v1.zip › elife_poa_e57571_Figure_1_figure_supplement_2_source_data_1.xlsx]

## Sheet: Figure1-supplement figure 2C
	Second BF Elicited		Time elapsed
0 = no BF
1 = BF
	1		4.45			n	61
	1		4.56667
	1		3.61667
	1		4.13333
	0		3.53333
	1		4.28333
	1		5.5
	1		3.13333
	1		4.63333
	1		5.13333
	1		5.4
	1		5.45
	1		6.63333
	1		5.36667
	1		5.63333
	1		7.25
	1		6.33333
	1		4.91667
	1		4.86667
	1		5.13333
	1		5.76667
	1		4.98333
	1		4.66667
	1		6.31667
	0		0.0216667
	0		0.0141667
	0		0.3
	0		0.0395
	0		0.015
	0		0.0666667
	1		2.95
	1		2.18333
	1		1.23333
	1		2.05
	1		2.53333
	1		1.95
	1		1.73333
	1		1.5
	1		2.43333
	1		3.96667
	1		3.25
	1		2.81667
	1		3.36667
	1		4.56667
	1		4.33333
	1		4.11667
	1		4.7
	1		3.96667
	1		3.1
	1		3.08333
	1		3.33333
	1		3
	1		2.322
	1		3.03333
	1		3.35
	1		2.56667
	0		0.5
	0		0.616667
	0		0.916667
	1		1.51667
	1		0.85

## Sheet: Figure1-supplement figure 2D,E
SUPP FIG 2D									SUPP FIG 2E
DURATION OF BF (seconds)									% change
MOUSE					HUMAN				DURATION OF BF
BF1,BF2	BF3,BF4				BF1,BF2	BF3,BF4
3.481	3.029				5.1275	6.6			87.0152	128.718
1.402	1.407				9.667	15.6045			100.357	161.42
2.7235	1.7745				19.503	22.321			65.1551	114.449
2.7135	3.649				25.982	23.437			134.476	90.2048
2.553	1.997				20.296	23.753			78.2217	117.033
4.085	2.9985				2.965	3.3985			73.4027	114.621
2.091	1.577								75.4185
2.688	1.7065								63.4859
2.764	2.4115								87.2467
2.252	2.151								95.5151
2.263	2.0305								89.726
1.991	1.639								82.3204
3.0235	1.7205								56.9043
2.6255	2.209								84.1364
2.52	2.8345								112.48
3.265	1.8025								55.2067
Shapiro Wilk Normaiity Test					Shapiro Wilk Normaiity Test
p	0.8				p	0.57
W	0.97				W	0.92
NORMALLY DISTRUBUTED					NORMALLY DISTRUBUTED
Two-tailed paired t-test					Two-tailed paired t-test
t-statistic		3.07			t-statistic	-1.6
DF		15			DF	5
P value		0.0077			P value	0.162
