# Supplementary material for: Activity-dependent tuning of intrinsic excitability in mouse and human neurogliaform cells
Source: eLife journal article supplement (doi:10.7554/elife.57571), 2020-06-04
Supplement: supp [file elife-57571-supp-v1.zip › elife_poa_e57571_Figure_1_source_data_1.xlsx]

## Sheet: Figure 1E and F
No of Action potentials Required to Elciit BF									Duration of BF (seconds)
		MOUSE	MOUSE	HUMAN	MOUSE	MOUSE			MOUSE	MOUSE	HUMAN	MOUSE	MOUSE
		30Hz HIPP	30Hz CTX	30Hz Ctx	8Hz HIPP	100Hz HIPP			30Hz HIPP	30Hz CTX	30Hz Ctx	8Hz HIPP	100Hz HIPP
n
1		480	420	520	540	320			3.4	3.389	5.482	5.256	1.354
2		510	590	680	730	500			2.913	8.714	17.855	3.044	3.365
3		700	610	480	970	370			2.532	2.199	19.503	3.595	2.138
4		540	450	610	1080	150			2.597	3.695	26.903	2.823	2.659
5		430	600	670	500	360			2.752	3.86	1.136	2.711	3.801
6		410	540	940	950	470			3.464	3.471	15.24	3.202	2.188
7		450	390	830	490	540			2.905	3.08	0.64	3.12	0.592
8		260	540	1270	640				4.421	2.435	1.167	3.594
9		490	720	620	510				4.393	2.577	5.266	2.474
10		660	340	960	460				2.874	3.043	20.296	2.206
11		540	480	690	530				1.989	3.4	0.393	2.039
12		660	220	740	500				4.733	2.216	5.37	2.835
13		570	460						2.82	1.851
14		600	670						3.364	3.6
15		540	490						2.805	2.144
16		570							2.914
17		550							2.514
18		640							2.312
19		380							4.31
20		590							2.25
21		580							2.775
22		410							2.991
23		880							2.854
24		390							3.678
25		480							2.703
26		280							1.61
27		480							1.979
28		510							2.47
29		480							2.46
30		450							2.19
31		340							5.47
32		520							2.477
33		490							1.945
34		480							2.568
35		400							1.76
36		380							3.395
37		550							2.54
38		430							2.534
39		350							2.361
40		430							2.729
41		560							4.161
42		310							3.429
43		450							5
44		400							3.311
45		450							2.734
46		470							2.221
47		350							2.818
48		510							2.654
49		510							2.114
50		430							3.397
51		550							2.846
52		500							3.874
53		470							3.227
54		520							5.501
55		630							4.03
56		820							3.006
57		620							4.629
58		600							2.332
59		600							2.467
60		590							2.424
61		680							2.537
62		350							3.048
63		520							1.995
64		580							4.471
65		480							2.995
66		440							2.935
67		470							2.25
68		530							2.865
n		68	15	12	12	7			68	15	12	12	7
mean		503.971	501.333	750.833	658.333	387.143			3.01503	3.3116	9.93758	3.07492	2.29957
std		13.7249	33.649	63.6213	63.709	49.9387			0.105144	0.420458	2.71345	0.242445	0.418816
