# Supplementary material for: Activity-dependent tuning of intrinsic excitability in mouse and human neurogliaform cells
Source: eLife journal article supplement (doi:10.7554/elife.57571), 2020-06-04
Supplement: supp [file elife-57571-supp-v1.zip › elife_poa_e57571_Figure_2_source_data_1.xlsx]

## Sheet: Figure 2B
	n		1			2			3			4			5			6			7			8			8			8			8			8
			MOUSE HIPP			MOUSE HIPP			MOUSE HIPP			MOUSE HIPP			MOUSE HIPP			MOUSE HIPP			MOUSE HIPP			MOUSE HIPP			MOUSE CTX			MOUSE CTX			MOUSE CTX			MOUSE CTX				AVERAGE	STDEV		AVERAGE	STDEV
	Current Injection		PreBF	PostBF		PreBF	PostBF		PreBF	PostBF		PreBF	PostBF		PreBF	PostBF		PreBF	PostBF		PreBF	PostBF		PreBF	PostBF		PreBF	PostBF		PreBF	PostBF		PreBF	PostBF		PreBF	PostBF			PreBF	PreBF		PreBF	PreBF
	0		0	0		0	0		0	0		0	0		0	0		0	0		0	0		0	0		0	0		0	0		0	0		0	0			0	0		0	0
	50		0	1		0	2		0	5		0	0		0	1		0	3		0	1		0	0		0	16		0	0		0	0		0	1			0	0		2.5	1.29977
	75		0	7		0	2		0	19		0	1		0	1		0	20		0	10		0	27		0	21		0	1		0	1		0	10			0	0		10	2.73585
	100		0	19		0	15		2	25		0	14		0	3		0	22		0	21		0	33		5	26		0	10		0	1		0	6			0.583333	0.434468		16.25	2.85276
	125		8	22		0	21		11	27		6	37		0	11		10	23		4	17		0	34		14	26		0	14		0	8		0	24			4.41667	1.50483		22	2.49545
	150		14	23		5	23		15	28		13	35		9	17		21	24		5	20		7	35		12	23		10	18		0	13		2	22			9.41667	1.72968		23.4167	1.91271
	175		18	25		12	25		18	27		19	30		17	20		25	24		7	21		13	35		12	23		12	19		6	17		6	24			13.75	1.68831		24.1667	1.424
	200		21	25		15	26		20	28		22	27		21	23		22	24		6	18		16	35		13	20		14	20		11	22		10	24			15.9167	1.53967		24.3333	1.2988
	225		23	25		17	22		22	28		24	25		23	25		22	23		6	18		20	36		14	19		13	21		12	21		12	24			17.3333	1.68475		23.9167	1.36769
	total no. action potentials		84	147		49	136		88	187		84	169		70	101		100	163		28	126		56	235		70	174		49	103		29	83		30	135			61.4167	7.20633		146.583	12.2056
	latency
	threshold
			HUMAN CTX			HUMAN CTX			HUMAN CTX																															AVERAGE	STDEV		AVERAGE	STDEV
	Current Injection		PreBF	PostBF		PreBF	PostBF		PreBF	PostBF																														PreBF	PreBF		PreBF	PreBF
Curve	0		0	0		0	0		0	0																												0		0	0		0	0
	50		0	0		0	0		0	12																												50		0	4		4	4.89898
	75		0	13		0	0		0	14																												75		0	4.50925		9	5.71548
	100		15	30		0	16		10	19																												100		8.33333	4.25572		21.6667	1.22474
	125		22	37		6	28		17	27																												125		15	3.1798		30.6667	0.408248
	150		25	40		22	34		21	29																												150		22.6667	3.1798		34.3333	2.04124
	175		28	45		28	36		25	37																												175		27	2.848		39.3333	0.408248
	200		30	49		30	38		28	42																												200		29.3333	3.21455		43	1.63299
	225		34	50		34	42		33	50																												225		33.6667	2.66667		47.3333	3.26599
	total no. action potentials		154	264		120	194		134	230																												total no. action potentials		136	20.21		229.333	14.6969

## Sheet: Figure 2C
Total Number of Action Potantial (calculated from Input/output curves - Figure 2B)
MOUSE HIPP/CTC						HUMAN CTX
n	preBF	postBF			n	preBF	postBF
1	84	147			1	154	264
2	49	136			2	120	194
3	88	187			3	134	230
4	84	169
5	70	101
6	100	163
7	28	126
8	56	235
9	70	174
10	49	103
11	29	83
12	30	135
Shapiro Wilk Normaiity Test					Shapiro Wilk Normaiity Test
p		0.33			p		0.99
W		0.925			W		0.99
		NORMAL DISTRIBUTED					NORMAL DISTRIBUTED
Paired t-test					Paired t-test
t-statistic		-7.8			t-statistic		-8.9
DF		11			DF		2
P value		8.3e-06			P Value		0.012

## Sheet: Figure 2E
	n
	Voltage Step		PreBF	PostBF		PreBF	PostBF		PreBF	PostBF		PreBF	PostBF		PreBF	PostBF								Voltage Step		PreBF		PostBF													#REF!
																										Average	STD	Average	STD												#REF!
	5		0	0		0	0		0	0		0	0		0	0								5		0	0	0	0												#REF!
	10		0	1		0	0		0	1		0	0		0	1								10		0	0	0.6	0.244949												#REF!
	15		0	1		0	0		0	1		0	0		0	1								15		0	0	0.6	0.244949												#REF!
	20		0	1		0	0		0	1		0	0		0	1								20		0	0	0.6	0.244949												#REF!
	25		0	1		0	1		0	4		0	0		0	1								25		0	0	1.4	0.678233
	30		0	3		0	1		0	5		0	1		0	3								30		0	0	2.6	0.748331
	35		1	6		0	2		0	6		0	1		0	4								35		0.2	0.2	3.8	1.0198
	n		1			2			3
	Voltage Step		PreBF	PostBF		PreBF	PostBF		PreBF	PostBF														Voltage Step		PreBF		PostBF
																										Average	STD	Average	STD
	5		0	2		0	0		0	0														5		0	0	0.666667	0.516398
	10		0	2		0	0		0	0														10		0	0	0.666667	0.516398
	15		0	3		0	0		0	0														15		0	0	1	0.774597
	20		0	4		0	0		0	1														20		0	0	1.66667	0.930949
	25		0	6		0	1		0	6														25		0	0	4.33333	1.29099
	30		0	8		1	5		2	12														30		1	0.447214	8.33333	1.57056

## Sheet: Figure 2G
		DURATION OF ENHANCED ACTION CURRENT OUTPUT (S)
		MOUSE	MOUSE	HUMAN				MOUSE			MOUSE
n		postBF1	postBF4	postBF4				postBF1			postBF4
1		20	56	210
2		43	118	20
3		77	103	647			Shapiro Wilk Normaiity Test				Shapiro Wilk Normaiity Test
4		112	237	902			p	0.43			p	0.14
5		43	246				W	0.93			W	0.89
6		68	630
7		50	500				NORMALLY DISTRUBUTED				NORMALLY DISTRUBUTED
8		89	478
9		27	16
10		35	250
11		18	107
12
13
14							MOUSE post BF1 Plasticity Duration VS MOUSE post BF2 Plasticity Duration
15
16							Paired t-test
17							t-statistic		-3.4
18							DF		10
19							P value		0.007
20
21
22
23
24
25
26
27
28
29
30
31
32
33
34
35
36
37
