# Supplementary material for: Activity-dependent tuning of intrinsic excitability in mouse and human neurogliaform cells
Source: eLife journal article supplement (doi:10.7554/elife.57571), 2020-06-04
Supplement: supp [file elife-57571-supp-v1.zip › elife_poa_e57571_Figure_3_source_data_1.xlsx]

## Sheet: Figure 3D Mouse NGFC STP-SE
	MOUSE NGFC STP-SE
	Sweep	N	1			2			3			4			5			6			7			8			9			Sweep	AVE	STDEV
			APs	% baseline		spikes	% baseline		spikes	% baseline		spikes	% baseline		spikes	% baseline		spikes	% baseline		spikes	% baseline		spikes	% baseline		spikes	% baseline
Baseline	1		3	122.449		3	122.449		3	109.091		2	88.8889		3	101.695		2	67.7966		2	90.9091		5	114.943		3	93.75		1	101.33	5.98959
	2		2	81.6327		3	122.449		3	109.091		2	88.8889		3	101.695		3	101.695		2	90.9091		6	137.931		4	125		2	106.588	6.24607
	3		2	81.6327		1	40.8163		2	72.7273		2	88.8889		3	101.695		4	135.593		3	136.364		6	137.931		4	125		3	102.294	11.3748
	4		3	122.449		2	81.6327		2	72.7273		3	133.333		3	101.695		3	101.695		3	136.364		5	114.943		4	125		4	109.982	7.43098
	5		2	81.6327		3	122.449		3	109.091		1	44.4444		3	101.695		4	135.593		3	136.364		4	91.954		4	125		5	105.358	9.88391
	6		3	122.449		4	163.265		2	72.7273		2	88.8889		2	67.7966		3	101.695		2	90.9091		4	91.954		4	125		6	102.743	9.94312
	7		2	81.6327		2	81.6327		2	72.7273		3	133.333		2	67.7966		3	101.695		3	136.364		5	114.943		4	125		7	101.68	8.90906
	8		3	122.449		3	122.449		3	109.091		2	88.8889		3	101.695		4	135.593		2	90.9091		4	91.954		4	125		8	109.781	5.76765
	9		4	163.265		2	81.6327		3	109.091		1	44.4444		3	101.695		3	101.695		2	90.9091		4	91.954		3	93.75		9	97.604	10.3074
	10		2	81.6327		2	81.6327		2	72.7273		2	88.8889		3	101.695		2	67.7966		2	90.9091		4	91.954		4	125		10	89.1373	5.64249
	11		3	122.449		2	81.6327		3	109.091		3	133.333		3	101.695		2	67.7966		2	90.9091		4	91.954		3	93.75		11	99.1789	6.72411
	12		2	81.6327		3	122.449		3	109.091		2	88.8889		3	101.695		2	67.7966		2	90.9091		4	91.954		3	93.75		12	94.2407	5.23777
	13		2	81.6327		2	81.6327		3	109.091		2	88.8889		3	101.695		2	67.7966		2	90.9091		4	91.954		3	93.75		13	89.7055	4.00245
	14		2	81.6327		3	122.449		4	145.455		3	133.333		2	67.7966		3	101.695		2	90.9091		4	91.954		3	93.75		14	103.219	8.45876
	15		3	122.449		2	81.6327		3	109.091		2	88.8889		3	101.695		3	101.695		2	90.9091		4	91.954		3	93.75		15	98.0072	4.08905
	16		2	81.6327		2	81.6327		3	109.091		1	44.4444		2	67.7966		3	101.695		2	90.9091		4	91.954		2	62.5		16	81.295	6.75819
	17		2	81.6327		3	122.449		3	109.091		4	177.778		4	135.593		4	135.593		2	90.9091		4	91.954		3	93.75		17	115.417	10.2432
	18		3	122.449		2	81.6327		2	72.7273		2	88.8889		5	169.492		4	135.593		2	90.9091		4	91.954		2	62.5		18	101.794	11.383
	19		2	81.6327		3	122.449		3	109.091		4	177.778		4	135.593		3	101.695		2	90.9091		4	91.954		2	62.5		19	108.178	11.3007
	20		2	81.6327		2	81.6327		3	109.091		2	88.8889		2	67.7966		2	67.7966		2	90.9091		4	91.954		2	62.5		20	82.4668	4.91859
Induction Start	21		2	81.6327		1	40.8163		2	72.7273		1	44.4444		1	33.8983		2	67.7966		2	90.9091		3	68.9655		2	62.5		21	62.6322	6.41361
	22		3	122.449		1	40.8163		5	181.818		0	0		1	33.8983		4	135.593		2	90.9091		3	68.9655		1	31.25		22	78.4111	19.6902
	23		3	122.449		2	81.6327		4	145.455		2	88.8889		1	33.8983		4	135.593		2	90.9091		2	45.977		1	31.25		23	86.2281	14.2828
	24		3	122.449		1	40.8163		3	109.091		0	0		1	33.8983		4	135.593		1	45.4545		2	45.977		1	31.25		24	62.7255	15.7416
	25		3	122.449		0	0		3	109.091		0	0		0	0		4	135.593		1	45.4545		2	45.977		1	31.25		25	54.4239	18.1732
	26		3	122.449		1	40.8163		3	109.091		0	0		1	33.8983		3	101.695		2	90.9091		1	22.9885		1	31.25		26	61.4552	14.8279
	27		3	122.449		1	40.8163		1	36.3636		2	88.8889		1	33.8983		6	203.39		1	45.4545		2	45.977		1	31.25		27	72.0542	19.3039
	28		2	81.6327		1	40.8163		3	109.091		2	88.8889		1	33.8983		4	135.593		1	45.4545		2	45.977		1	31.25		28	68.0669	12.4305
	29		2	81.6327		2	81.6327		0	0		3	133.333		2	67.7966		1	33.8983		1	45.4545		0	0		2	62.5		29	56.2498	14.1161
	30		2	81.6327		0	0		0	0		1	44.4444		3	101.695		0	0		1	45.4545		2	45.977		1	31.25		30	38.9393	12.0711
	31		3	122.449		0	0		2	72.7273		1	44.4444		3	101.695		0	0		1	45.4545		2	45.977		1	31.25		31	51.5552	13.862
	32		3	122.449		0	0		1	36.3636		1	44.4444		2	67.7966		0	0		2	90.9091		1	22.9885		1	31.25		32	46.2446	13.6474
	33		3	122.449		0	0		0	0		1	44.4444		2	67.7966		0	0		2	90.9091		1	22.9885		1	31.25		33	42.2042	14.5794
	34		3	122.449		0	0		0	0		0	0		0	0		0	0		2	90.9091		3	68.9655		1	31.25		34	34.8415	15.8402
	35		3	122.449		0	0		1	36.3636		2	88.8889		0	0		1	33.8983		2	90.9091		2	45.977		1	31.25		35	49.9707	14.0672
	36		3	122.449		0	0		0	0		1	44.4444		0	0		1	33.8983		1	45.4545		1	22.9885		1	31.25		36	33.3872	12.7241
	37		4	163.265		0	0		2	72.7273		2	88.8889		0	0		1	33.8983		1	45.4545		1	22.9885		1	31.25		37	50.9414	17.1638
	38		4	163.265		1	40.8163		0	0		1	44.4444		0	0		2	67.7966		2	90.9091		3	68.9655		1	31.25		38	56.383	16.7825
	39		4	163.265		0	0		0	0		0	0		0	0		1	33.8983		2	90.9091		3	68.9655		2	62.5		39	46.6154	18.6989
	40		5	204.082		1	40.8163		1	36.3636		2	88.8889		0	0		2	67.7966		2	90.9091		2	45.977		1	31.25		40	67.3426	19.6055
	41		5	204.082		1	40.8163		1	36.3636		1	44.4444		0	0		1	33.8983		2	90.9091		1	22.9885		2	62.5		41	59.5558	19.9092
	42		6	244.898		0	0		0	0		2	88.8889		0	0		2	67.7966		2	90.9091		3	68.9655		2	62.5		42	69.3287	25.3151
	43		11	448.98		0	0		2	72.7273		1	44.4444		0	0		2	67.7966		2	90.9091		2	45.977		2	62.5		43	92.5927	45.7298
	44		12	489.796		0	0		4	145.455		1	44.4444		0	0		2	67.7966		2	90.9091		1	22.9885		2	62.5		44	102.654	50.7563
	45		12	489.796		1	40.8163		1	36.3636		2	88.8889		0	0		2	67.7966		2	90.9091		3	68.9655		2	62.5		45	105.115	48.9997
	46		12	489.796		2	81.6327		5	181.818		3	133.333		0	0		2	67.7966		3	136.364		3	68.9655		2	62.5		46	135.801	47.6208
	47		12	489.796		0	0		1	36.3636		1	44.4444		0	0		6	203.39		4	181.818		4	91.954		2	62.5		47	123.363	51.7766
	48		12	489.796		1	40.8163		6	218.182		1	44.4444		0	0		3	101.695		6	272.727		4	91.954		3	93.75		48	150.374	51.3161
	49		12	489.796		1	40.8163		6	218.182		2	88.8889		0	0		2	67.7966		6	272.727		4	91.954		2	62.5		49	148.073	51.5155
	50		12	489.796		1	40.8163		6	218.182		2	88.8889		0	0		3	101.695		6	272.727		5	114.943		3	93.75		50	157.866	49.9301
	51		13	530.612		2	81.6327		7	254.545		5	222.222		0	0		3	101.695		5	227.273		8	183.908		3	93.75		51	188.404	51.0351
	52		12	489.796		3	122.449		7	254.545		2	88.8889		0	0		3	101.695		6	272.727		9	206.897		3	93.75		52	181.194	48.3654
	53		13	530.612		3	122.449		8	290.909		4	177.778		0	0		3	101.695		6	272.727		10	229.885		4	125		53	205.673	50.7251
	54		13	530.612		4	163.265		9	327.273		5	222.222		1	33.8983		3	101.695		6	272.727		11	252.874		5	156.25		54	228.98	48.1664
	55		14	571.429		5	204.082		10	363.636		4	177.778		0	0		3	101.695		7	318.182		12	275.862		6	187.5		55	244.463	54.8984
	56		12	489.796		6	244.898		11	400		4	177.778		3	101.695		3	101.695		7	318.182		14	321.839		7	218.75		56	263.848	43.8262
	57		13	530.612		7	285.714		12	436.364		6	266.667		2	67.7966		3	101.695		8	363.636		14	321.839		6	187.5		57	284.647	50.1936
	58		13	530.612		8	326.531		13	472.727		5	222.222		2	67.7966		4	135.593		9	409.091		14	321.839		7	218.75		58	300.574	51.3288
	59		13	530.612		10	408.163		14	509.091		4	177.778		1	33.8983		4	135.593		10	454.545		13	298.851		6	187.5		59	304.004	59.8349
	60		13	530.612		10	408.163		13	472.727		7	311.111		4	135.593		4	135.593		11	500		13	298.851		6	187.5		60	331.128	51.752
	61		13	530.612		10	408.163		14	509.091		7	311.111		6	203.39		4	135.593		11	500		13	298.851		6	187.5		61	342.701	50.1849
	62		13	530.612		9	367.347		14	509.091		9	400		6	203.39		4	135.593		11	500		13	298.851		6	187.5		62	348.043	49.9562
	63		13	530.612		9	367.347		14	509.091		10	444.444		7	237.288		5	169.492		12	545.455		12	275.862		6	187.5		63	363.01	50.1415
	64		12	489.796		8	326.531		14	509.091		12	533.333		8	271.186		4	135.593		12	545.455		12	275.862		6	187.5		64	363.816	52.6498
	65		13	530.612		8	326.531		14	509.091		13	577.778		9	305.085		5	169.492		12	545.455		11	252.874		6	187.5		65	378.268	54.2391
	66		13	530.612		9	367.347		13	472.727		13	577.778		9	305.085		6	203.39		12	545.455		12	275.862		6	187.5		66	385.084	50.333
	67		13	530.612		9	367.347		14	509.091		13	577.778		10	338.983		6	203.39		12	545.455		12	275.862		6	187.5		67	392.891	50.7279
	68		13	530.612		10	408.163		13	472.727		13	577.778		10	338.983		6	203.39		11	500		12	275.862		6	187.5		68	388.335	47.9787
	69		12	489.796		10	408.163		13	472.727		13	577.778		11	372.881		8	271.186		11	500		12	275.862		6	187.5		69	395.099	42.9313
	70		12	489.796		10	408.163		12	436.364		13	577.778		11	372.881		13	440.678		11	500		12	275.862		6	187.5		70	409.891	39.6396
	71		12	489.796		10	408.163		12	436.364		14	622.222		12	406.78		15	508.475		10	454.545		11	252.874		6	187.5		71	418.524	43.6745
	72		13	530.612		9	367.347		12	436.364		13	577.778		12	406.78		18	610.169		11	500		12	275.862		6	187.5		72	432.49	46.5976
	73		12	489.796		8	326.531		12	436.364		11	488.889		12	406.78		17	576.271		11	500		12	275.862		6	187.5		73	409.777	41.4173
	74		12	489.796		8	326.531		13	472.727		10	444.444		11	372.881		18	610.169		10	454.545		11	252.874		8	250		74	408.219	39.4662
	75		11	448.98		8	326.531		12	436.364		10	444.444		12	406.78		18	610.169		11	500		12	275.862		9	281.25		75	414.487	35.9271
	76		11	448.98		7	285.714		12	436.364		10	444.444		11	372.881		15	508.475		10	454.545		11	252.874		9	281.25		76	387.281	30.8507
	77		9	367.347		7	285.714		12	436.364		9	400		12	406.78		14	474.576		10	454.545		11	252.874		10	312.5		77	376.744	25.9453
	78		9	367.347		6	244.898		12	436.364		9	400		11	372.881		14	474.576		10	454.545		11	252.874		11	343.75		78	371.915	27.2409
	79		9	367.347		5	204.082		13	472.727		9	400		10	338.983		13	440.678		10	454.545		11	252.874		11	343.75		79	363.887	30.3145
	80		8	326.531		5	204.082		13	472.727		9	400		10	338.983		13	440.678		9	409.091		11	252.874		12	375		80	357.774	29.0486
	81		7	285.714		4	163.265		12	436.364		9	400		10	338.983		14	474.576		9	409.091		11	252.874		12	375		81	348.43	32.9414
	82		7	285.714		5	204.082		12	436.364		8	355.556		10	338.983		14	474.576		9	409.091		11	252.874		12	375		82	348.027	29.3613
	83		6	244.898		5	204.082		11	400		10	444.444		10	338.983		14	474.576		9	409.091		12	275.862		12	375		83	351.882	30.9525
	84		6	244.898		5	204.082		12	436.364		9	400		10	338.983		14	474.576		9	409.091		11	252.874		12	375		84	348.43	31.5053
	85		7	285.714		5	204.082		11	400		9	400		11	372.881		14	474.576		10	454.545		10	229.885		13	406.25		85	358.659	32.127
	86		7	285.714		4	163.265		12	436.364		9	400		11	372.881		13	440.678		9	409.091		12	275.862		12	375		86	350.984	30.5759
	87		7	285.714		4	163.265		11	400		9	400		10	338.983		14	474.576		9	409.091		10	229.885		12	375		87	341.835	32.8269
	88		6	244.898		4	163.265		12	436.364		9	400		10	338.983		14	474.576		9	409.091		11	252.874		12	375		88	343.895	34.3047
	89		7	285.714		3	122.449		12	436.364		10	444.444		10	338.983		14	474.576		9	409.091		11	252.874		12	375		89	348.833	37.5406
	90		6	244.898		2	81.6327		12	436.364		10	444.444		10	338.983		14	474.576		9	409.091		11	252.874		12	375		90	339.762	42.1132
	91		7	285.714		2	81.6327		12	436.364		10	444.444		10	338.983		14	474.576		9	409.091		10	229.885		12	375		91	341.743	41.8502
	92		6	244.898		4	163.265		11	400		9	400		10	338.983		14	474.576		9	409.091		11	252.874		11	343.75		92	336.382	32.8828
	93		8	326.531		3	122.449		11	400		10	444.444		10	338.983		14	474.576		9	409.091		11	252.874		11	343.75		93	345.855	35.7849
	94		7	285.714		2	81.6327		11	400		9	400		10	338.983		13	440.678		9	409.091		11	252.874		11	343.75		94	328.08	36.9191
	95		7	285.714		2	81.6327		12	436.364		9	400		10	338.983		13	440.678		9	409.091		10	229.885		11	343.75		95	329.566	38.8474
	96		6	244.898		2	81.6327		11	400		9	400		10	338.983		14	474.576		9	409.091		10	229.885		11	343.75		96	324.757	40.1268
	97		6	244.898		2	81.6327		11	400		10	444.444		9	305.085		13	440.678		9	409.091		10	229.885		11	343.75		97	322.163	40.0887
	98		7	285.714		2	81.6327		11	400		9	400		10	338.983		14	474.576		9	409.091		10	229.885		11	343.75		98	329.292	39.2452
	99		7	285.714		3	122.449		10	363.636		9	400		10	338.983		13	440.678		9	409.091		10	229.885		11	343.75		99	326.021	33.2761
	100		6	244.898		2	81.6327		10	363.636		9	400		10	338.983		13	440.678		9	409.091		10	229.885		11	343.75		100	316.95	37.6802
	101		6	244.898		1	40.8163		11	400		9	400		9	305.085		14	474.576		9	409.091		11	252.874		11	343.75		101	319.01	43.0598
	102		7	285.714		1	40.8163		10	363.636		8	355.556		9	305.085		14	474.576		9	409.091		11	252.874		11	343.75		102	314.566	40.6792
	103		7	285.714		1	40.8163		11	400		9	400		9	305.085		14	474.576		9	409.091		10	229.885		11	343.75		103	320.991	42.9225
	104		6	244.898		1	40.8163		10	363.636		9	400		9	305.085		14	474.576		9	409.091		10	229.885		11	343.75		104	312.415	42.835
	105		6	244.898		1	40.8163		11	400		8	355.556		9	305.085		14	474.576		9	409.091		11	252.874		11	343.75		105	314.072	42.1728
	106		7	285.714		2	81.6327		10	363.636		9	400		9	305.085		14	474.576		9	409.091		12	275.862		11	343.75		106	326.594	37.3558
	107		6	244.898		2	81.6327		11	400		8	355.556		10	338.983		13	440.678		9	409.091		10	229.885		10	312.5		107	312.58	37.3916
	108		6	244.898		1	40.8163		12	436.364		8	355.556		9	305.085		14	474.576		9	409.091		11	252.874		10	312.5		108	314.64	43.2605
	109		5	204.082		1	40.8163		11	400		8	355.556		8	271.186		14	474.576		9	409.091		11	252.874		10	312.5		109	302.298	43.3013
	110		6	244.898		1	40.8163		10	363.636		8	355.556		9	305.085		13	440.678		9	409.091		10	229.885		10	312.5		110	300.238	39.8151
	111		5	204.082		1	40.8163		12	436.364		7	311.111		9	305.085		13	440.678		9	409.091		10	229.885		10	312.5		111	298.846	42.7967
	112		6	244.898		0	0		11	400		8	355.556		9	305.085		13	440.678		9	409.091		11	252.874		10	312.5		112	302.298	44.1225
No of Inducing Action Potantials			290			450			430			480			350			310			320			290			350
threshold	baseline			-28.8			-28.5			-27.8			-30.1			-31.8			-27			-28.7			-26.4			-32		baseline
	STPSE			-39			-40.2			-35.5			-38.2			-44.7			-36.2			-45.6			-36.8			-45		STPSE
Latency	baseline			99			181			134			88			141			88			106			105			96		baseline
	STPSE			5.7			6			10			11			6			18			36			16			10		STPSE
SUMMARY OF Ns for Figure 3D
		STPSE	noSTP-SE		%
Mouse NGFC		9	7		56.25
Human NGFCs		4	2		66.6667
Mouse non NGFCS		0	4		0
Human non NGFCS		0	3		0
TOTAL STP_SE			16

## Sheet: Figure 3D Human NGFC STP-SE
	HUMAN NGFC STP-SE
	Sweep	n	1			2			3			4			Sweep	AVE	STDEV
			APs	% baseline		spikes	% baseline		spikes	% baseline		spikes	% baseline
Baseline	1		1	95.2381		2	105.263		1	86.9565		1	95.2381		1	95.674	3.74529
	2		1	95.2381		1	52.6316		1	86.9565		1	95.2381		2	82.5161	10.1509
	3		1	95.2381		2	105.263		0	0		1	95.2381		3	73.9348	24.758
	4		1	95.2381		2	105.263		1	86.9565		1	95.2381		4	95.674	3.74529
	5		2	190.476		2	105.263		1	86.9565		1	95.2381		5	119.483	23.9583
	6		1	95.2381		2	105.263		1	86.9565		1	95.2381		6	95.674	3.74529
	7		1	95.2381		2	105.263		2	173.913		1	95.2381		7	117.413	18.981
	8		1	95.2381		3	157.895		1	86.9565		1	95.2381		8	108.832	16.4704
	9		1	95.2381		2	105.263		1	86.9565		1	95.2381		9	95.674	3.74529
	10		1	95.2381		2	105.263		1	86.9565		1	95.2381		10	95.674	3.74529
	11		1	95.2381		2	105.263		1	86.9565		1	95.2381		11	95.674	3.74529
	12		1	95.2381		2	105.263		1	86.9565		1	95.2381		12	95.674	3.74529
	13		1	95.2381		2	105.263		1	86.9565		2	190.476		13	119.483	23.9583
	14		1	95.2381		2	105.263		1	86.9565		1	95.2381		14	95.674	3.74529
	15		1	95.2381		2	105.263		2	173.913		1	95.2381		15	117.413	18.981
	16		1	95.2381		1	52.6316		2	173.913		1	95.2381		16	104.255	25.2979
	17		1	95.2381		1	52.6316		1	86.9565		1	95.2381		17	82.5161	10.1509
	18		1	95.2381		2	105.263		1	86.9565		1	95.2381		18	95.674	3.74529
	19		1	95.2381		2	105.263		2	173.913		1	95.2381		19	117.413	18.981
	20		1	95.2381		2	105.263		1	86.9565		1	95.2381		20	95.674	3.74529
Induction Start	21		1	95.2381		1	52.6316		0	0		1	95.2381		21	60.7769	22.6114
	22		0	0		1	52.6316		0	0		1	95.2381		22	36.9674	23.0471
	23		0	0		0	0		0	0		1	95.2381		23	23.8095	23.8095
	24		0	0		0	0		0	0		0	0		24	0	0
	25		0	0		0	0		0	0		0	0		25	0	0
	26		0	0		2	105.263		1	86.9565		0	0		26	48.0549	27.995
	27		0	0		1	52.6316		1	86.9565		0	0		27	34.897	21.3313
	28		0	0		2	105.263		0	0		0	0		28	26.3158	26.3158
	29		0	0		1	52.6316		0	0		0	0		29	13.1579	13.1579
	30		1	95.2381		2	105.263		0	0		2	190.476		30	97.7444	38.9615
	31		0	0		2	105.263		0	0		1	95.2381		31	50.1253	29.0121
	32		0	0		1	52.6316		1	86.9565		2	190.476		32	82.5161	40.184
	33		0	0		1	52.6316		1	86.9565		0	0		33	34.897	21.3313
	34		1	95.2381		2	105.263		1	86.9565		1	95.2381		34	95.674	3.74529
	35		0	0		1	52.6316		1	86.9565		1	95.2381		35	58.7065	21.6333
	36		1	95.2381		2	105.263		1	86.9565		2	190.476		36	119.483	23.9583
	37		0	0		1	52.6316		0	0		2	190.476		37	60.7769	44.9777
	38		0	0		1	52.6316		1	86.9565		2	190.476		38	82.5161	40.184
	39		0	0		1	52.6316		0	0		1	95.2381		39	36.9674	23.0471
	40		1	95.2381		1	52.6316		0	0		0	0		40	36.9674	23.0471
	41		1	95.2381		2	105.263		0	0		2	190.476		41	97.7444	38.9615
	42		1	95.2381		2	105.263		0	0		3	285.714		42	121.554	59.6391
	43		1	95.2381		2	105.263		1	86.9565		3	285.714		43	143.293	47.621
	44		1	95.2381		2	105.263		0	0		4	380.952		44	145.363	82.0332
	45		1	95.2381		2	105.263		0	0		4	380.952		45	145.363	82.0332
	46		3	285.714		3	157.895		1	86.9565		3	285.714		46	204.07	49.3113
	47		4	380.952		3	157.895		1	86.9565		4	380.952		47	251.689	76.022
	48		0	0		3	157.895		1	86.9565		3	285.714		48	132.641	60.3807
	49		0	0		4	210.526		1	86.9565		4	380.952		49	169.609	82.6332
	50		0	0		4	210.526		1	86.9565		1	95.2381		50	98.1802	43.2007
	51		5	476.19		3	157.895		1	86.9565		1	95.2381		51	204.07	92.0786
	52		4	380.952		3	157.895		1	86.9565		1	95.2381		52	180.26	68.7458
	53		4	380.952		3	157.895		1	86.9565		1	95.2381		53	180.26	68.7458
	54		0	0		4	210.526		1	86.9565		1	95.2381		54	98.1802	43.2007
	55		3	285.714		3	157.895		2	173.913		2	190.476		55	202	28.6866
	56		3	285.714		3	157.895		2	173.913		2	190.476		56	202	28.6866
	57		2	190.476		4	210.526		2	173.913		2	190.476		57	191.348	7.49058
	58		1	95.2381		4	210.526		1	86.9565		2	190.476		58	145.799	31.8911
	59		2	190.476		4	210.526		2	173.913		4	380.952		59	238.967	47.9167
	60		2	190.476		4	210.526		2	173.913		3	285.714		60	215.157	24.6813
	61		1	95.2381		4	210.526		2	173.913		3	285.714		61	191.348	39.5958
	62		2	190.476		4	210.526		2	173.913		3	285.714		62	215.157	24.6813
	63		3	285.714		3	157.895		2	173.913		4	380.952		63	249.619	52.1984
	64		2	190.476		3	157.895		2	173.913		4	380.952		64	225.809	52.1404
	65		3	285.714		4	210.526		2	173.913		5	476.19		65	286.586	67.3491
	66		2	190.476		3	157.895		3	260.87		4	380.952		66	247.548	49.3872
	67		2	190.476		3	157.895		3	260.87		5	476.19		67	271.358	71.5787
	68		2	190.476		3	157.895		2	173.913		6	571.429		68	273.428	99.5559
	69		2	190.476		4	210.526		2	173.913		7	666.667		69	310.396	118.993
	70		2	190.476		4	210.526		3	260.87		7	666.667		70	332.135	112.489
	71		2	190.476		3	157.895		3	260.87		8	761.905		71	342.786	141.349
	72		2	190.476		4	210.526		4	347.826		8	761.905		72	377.683	132.761
	73		2	190.476		3	157.895		3	260.87		8	761.905		73	342.786	141.349
	74		2	190.476		4	210.526		6	521.739		6	571.429		74	373.543	100.502
	75		2	190.476		4	210.526		6	521.739		7	666.667		75	397.352	117.51
	76		1	95.2381		3	157.895		7	608.696		6	571.429		76	358.314	134.625
	77		1	95.2381		4	210.526		6	521.739		6	571.429		77	349.733	116.505
	78		1	95.2381		6	315.789		5	434.783		7	666.667		78	378.119	119.156
	79		1	95.2381		6	315.789		5	434.783		6	571.429		79	354.31	100.92
	80		1	95.2381		6	315.789		6	521.739		5	476.19		80	352.239	96.3813
	81		1	95.2381		6	315.789		5	434.783		6	571.429		81	354.31	100.92
	82		1	95.2381		6	315.789		5	434.783		7	666.667		82	378.119	119.156
	83		1	95.2381		5	263.158		4	347.826		7	666.667		83	343.222	119.911
	84		1	95.2381		5	263.158		4	347.826		6	571.429		84	319.413	99.0531
	85		1	95.2381		6	315.789		4	347.826		5	476.19		85	308.761	79.1624
	86		1	95.2381		6	315.789		5	434.783		8	761.905		86	401.929	139.087
	87		1	95.2381		6	315.789		3	260.87		6	571.429		87	310.831	98.705
	88		1	95.2381		6	315.789		4	347.826		9	857.143		88	403.999	161.144
	89		1	95.2381		6	315.789		3	260.87		8	761.905		89	358.45	142.419
	90		1	95.2381		7	368.421		3	260.87		7	666.667		90	347.799	120.224
	91		1	95.2381		6	315.789		4	347.826		5	476.19		91	308.761	79.1624
	92		1	95.2381		6	315.789		3	260.87		8	761.905		92	358.45	142.419
	93		2	190.476		6	315.789		4	347.826		7	666.667		93	380.19	101.347
	94		1	95.2381		6	315.789		4	347.826		9	857.143		94	403.999	161.144
	95		2	190.476		6	315.789		5	434.783		6	571.429		95	378.119	81.4832
	96		2	190.476		7	368.421		4	347.826		8	761.905		96	417.157	121.593
	97		2	190.476		7	368.421		4	347.826		7	666.667		97	393.347	99.3955
	98		2	190.476		6	315.789		4	347.826		9	857.143		98	427.809	147.083
	99		2	190.476		7	368.421		3	260.87		9	857.143		99	419.227	150.487
	100		2	190.476		5	263.158		5	434.783		7	666.667		100	388.771	105.847
	101		2	190.476		5	263.158		4	347.826		6	571.429		101	343.222	82.5838
	102		2	190.476		5	263.158		3	260.87		6	571.429		102	321.483	85.0056
	103		2	190.476		6	315.789		4	347.826		9	857.143		103	427.809	147.083
	104		2	190.476		6	315.789		3	260.87		9	857.143		104	406.07	152.529
	105		2	190.476		6	315.789		4	347.826		6	571.429		105	356.38	79.3152
	106		2	190.476		5	263.158		4	347.826		7	666.667		106	367.032	104.925
	107		2	190.476		5	263.158		4	347.826		6	571.429		107	343.222	82.5838
	108		2	190.476		6	315.789		2	173.913		7	666.667		108	336.711	114.454
	109		2	190.476		6	315.789		2	173.913		7	666.667		109	336.711	114.454
	110		2	190.476		6	315.789		3	260.87		10	952.381		110	429.879	176.045
	111		1	95.2381		6	315.789		3	260.87		9	857.143		111	382.26	165.088
	112		2	190.476		6	315.789		4	347.826		9	857.143		112	427.809	147.083
No of Inducing Action Potantials			270	476.19		560	368.421		540	608.696		500	952.381
threshold	baseline			-33.6			-35			-35.2			-42
	STPSE			-40.1			-41			-41.4			-49
Latency	baseline			140			144			138			172
	STPSE			17			44			47			21

## Sheet: Figure 3D Mouse Human non-STPSE
		MOUSE/HUMAN NGFC no STP-SE																												MOUSE/HUMAN no NGFC no STP-SE
	Sweep	1			2			3			4			5			6			7			8	no baseline		9	no baseline			10	no baseline		11	no baseline		12			13			14			15			16
		spikes	% baseline		spikes	% baseline		spikes	% baseline		spikes	% baseline		spikes	% baseline		spikes	% baseline		spikes	% baseline		spikes	% baseline		spikes	% baseline			spikes	% baseline		spikes	% baseline		spikes	% baseline		spikes	% baseline		spikes	% baseline		spikes	% baseline		spikes	% baseline
Baseline	1	2	97.4359		2	90.9091		3	96.7742		2	100		2	80		2	71.4286		2	95.2381		3	133.333		1	222.222		1	42.5532		2	153.846		2	105.263		2	62.5		1	105.263		1	86.3636		2	181.818
	2	2	97.4359		2	90.9091		3	96.7742		2	100		1	40		3	107.143		2	95.2381		3	133.333		0	0		2	85.1064		1	76.9231		1	52.6316		2	62.5		1	105.263		1	86.3636		2	181.818
	3	2	97.4359		3	136.364		2	64.5161		2	100		3	120		3	107.143		2	95.2381		2	88.8889		1	222.222		3	127.66		1	76.9231		1	52.6316		3	93.75		1	105.263		0	0		2	181.818
	4	1	48.7179		2	90.9091		3	96.7742		1	50		3	120		2	71.4286		2	95.2381		2	88.8889		1	222.222		3	127.66		1	76.9231		0	0		2	62.5		1	105.263		0	0		2	181.818
	5	3	146.154		2	90.9091		4	129.032		3	150		3	120		3	107.143		2	95.2381		3	133.333		1	222.222		2	85.1064		2	153.846		2	105.263		4	125		1	105.263		1	86.3636		1	90.9091
	6	2	97.4359		2	90.9091		3	96.7742		2	100		3	120		2	71.4286		3	142.857		2	88.8889		1	222.222		2	85.1064		1	76.9231		0	0		2	62.5		1	105.263		1	86.3636		1	90.9091
	7	1	48.7179		3	136.364		4	129.032		2	100		2	80		2	71.4286		2	95.2381		1	44.4444		0	0		1	42.5532		1	76.9231		1	52.6316		4	125		1	105.263		1	86.3636		1	90.9091
	8	2	97.4359		3	136.364		3	96.7742		3	150		2	80		4	142.857		2	95.2381		1	44.4444		0	0		3	127.66		1	76.9231		2	105.263		3	93.75		1	105.263		1	86.3636		1	90.9091
	9	3	146.154		2	90.9091		3	96.7742		2	100		3	120		4	142.857		2	95.2381		2	88.8889		0	0		3	127.66		1	76.9231		0	0		3	93.75		1	105.263		1	86.3636		1	90.9091
	10	4	194.872		2	90.9091		3	96.7742		2	100		3	120		3	107.143		2	95.2381		2	88.8889		0	0		3	127.66		2	153.846		0	0		5	156.25		1	105.263		2	172.727		1	90.9091
	11	2	97.4359		2	90.9091		3	96.7742		2	100		3	120		2	71.4286		2	95.2381		2	88.8889		0	0		2	85.1064		1	76.9231		2	105.263		4	125		1	105.263		1	86.3636		2	181.818
	12	1	48.7179		1	45.4545		2	64.5161		1	50		3	120		2	71.4286		2	95.2381		2	88.8889		1	222.222		1	42.5532		1	76.9231		2	105.263		4	125		1	105.263		1	86.3636		0	0
	13	2	97.4359		2	90.9091		3	96.7742		2	100		4	160		3	107.143		3	142.857		2	88.8889		0	0		3	127.66		1	76.9231		3	157.895		4	125		1	105.263		1	86.3636		1	90.9091
	14	3	146.154		2	90.9091		5	161.29		2	100		3	120		4	142.857		3	142.857		3	133.333		0	0		3	127.66		2	153.846		2	105.263		4	125		0	0		2	172.727		1	90.9091
	15	2	97.4359		2	90.9091		2	64.5161		2	100		3	120		3	107.143		2	95.2381		3	133.333		0	0		2	85.1064		2	153.846		3	157.895		2	62.5		1	105.263		2	172.727		1	90.9091
	16	1	48.7179		2	90.9091		3	96.7742		2	100		3	120		2	71.4286		2	95.2381		2	88.8889		1	222.222		2	85.1064		1	76.9231		3	157.895		6	187.5		1	105.263		1	86.3636		0	0
	17	2	97.4359		3	136.364		3	96.7742		3	150		1	40		3	107.143		1	47.619		3	133.333		1	222.222		3	127.66		1	76.9231		4	210.526		4	125		1	105.263		2	172.727		1	90.9091
	18	3	146.154		2	90.9091		4	129.032		1	50		2	80		2	71.4286		2	95.2381		3	133.333		0	0		3	127.66		1	76.9231		3	157.895		2	62.5		1	105.263		1	86.3636		1	90.9091
	19	1	48.7179		2	90.9091		3	96.7742		2	100		1	40		3	107.143		2	95.2381		2	88.8889		1	222.222		2	85.1064		1	76.9231		4	210.526		2	62.5		1	105.263		2	172.727		1	90.9091
	20	2	97.4359		3	136.364		3	96.7742		2	100		2	80		4	142.857		2	95.2381		2	88.8889		0	0		3	127.66		2	153.846		3	157.895		2	62.5		1	105.263		0	0		0	0
Induction Start	21	1	48.7179		1	45.4545		3	96.7742		2	100		2	80		2	71.4286		4	190.476		1	44.4444		1	222.222		3	127.66		1	76.9231		3	157.895		3	93.75		0	0		0	0		0	0
	22	2	97.4359		1	45.4545		1	32.2581		2	100		1	40		3	107.143		5	238.095		1	44.4444		0	0		2	85.1064		1	76.9231		1	52.6316		2	62.5		0	0		0	0		0	0
	23	3	146.154		1	45.4545		1	32.2581		2	100		2	80		2	71.4286		4	190.476		1	44.4444		0	0		3	127.66		0	0		0	0		1	31.25		1	105.263		0	0		0	0
	24	2	97.4359		1	45.4545		1	32.2581		1	50		2	80		0	0		4	190.476		1	44.4444		0	0		2	85.1064		1	76.9231		1	52.6316		1	31.25		1	105.263		0	0		0	0
	25	2	97.4359		1	45.4545		1	32.2581		2	100		2	80		0	0		5	238.095		0	0		0	0		2	85.1064		0	0		0	0		2	62.5		0	0		0	0		0	0
	26	2	97.4359		1	45.4545		0	0		2	100		1	40		0	0		4	190.476		1	44.4444		3	666.667		3	127.66		0	0		1	52.6316		0	0		1	105.263		1	86.3636		0	0
	27	2	97.4359		1	45.4545		1	32.2581		2	100		2	80		2	71.4286		5	238.095		1	44.4444		2	444.444		2	85.1064		0	0		1	52.6316		0	0		1	105.263		0	0		0	0
	28	1	48.7179		1	45.4545		1	32.2581		2	100		2	80		0	0		4	190.476		1	44.4444		2	444.444		1	42.5532		0	0		0	0		0	0		1	105.263		2	172.727		0	0
	29	1	48.7179		1	45.4545		1	32.2581		2	100		2	80		4	142.857		3	142.857		1	44.4444		2	444.444		2	85.1064		0	0		0	0		0	0		0	0		1	86.3636		0	0
	30	0	0		1	45.4545		0	0		2	100		2	80		4	142.857		3	142.857		1	44.4444		2	444.444		2	85.1064		0	0		2	105.263		0	0		0	0		1	86.3636		0	0
	31	1	48.7179		1	45.4545		0	0		2	100		2	80		4	142.857		2	95.2381		1	44.4444		1	222.222		2	85.1064		1	76.9231		1	52.6316		0	0		1	105.263		1	86.3636		0	0
	32	1	48.7179		1	45.4545		0	0		2	100		1	40		4	142.857		2	95.2381		1	44.4444		2	444.444		1	42.5532		1	76.9231		2	105.263		0	0		1	105.263		1	86.3636		0	0
	33	0	0		1	45.4545		1	32.2581		2	100		0	0		4	142.857		2	95.2381		1	44.4444		1	222.222		2	85.1064		1	76.9231		1	52.6316		0	0		1	105.263		2	172.727		0	0
	34	0	0		1	45.4545		1	32.2581		1	50		1	40		4	142.857		2	95.2381		1	44.4444		1	222.222		1	42.5532		0	0		1	52.6316		0	0		1	105.263		1	86.3636		0	0
	35	0	0		1	45.4545		0	0		2	100		1	40		4	142.857		2	95.2381		1	44.4444		1	222.222		1	42.5532		1	76.9231		1	52.6316		0	0		1	105.263		1	86.3636		0	0
	36	1	48.7179		1	45.4545		0	0		1	50		2	80		4	142.857		2	95.2381		1	44.4444		2	444.444		1	42.5532		1	76.9231		1	52.6316		0	0		1	105.263		2	172.727		0	0
	37	1	48.7179		1	45.4545		0	0		2	100		2	80		4	142.857		2	95.2381		0	0		1	222.222		1	42.5532		1	76.9231		1	52.6316		0	0		0	0		1	86.3636		1	90.9091
	38	0	0		0	0		0	0		2	100		1	40		4	142.857		2	95.2381		1	44.4444		1	222.222		1	42.5532		1	76.9231		1	52.6316		0	0		1	105.263		2	172.727		0	0
	39	1	48.7179		1	45.4545		0	0		2	100		0	0		4	142.857		3	142.857		1	44.4444		0	0		2	85.1064		1	76.9231		1	52.6316		0	0		1	105.263		2	172.727		0	0
	40	0	0		0	0		1	32.2581		1	50		0	0		3	107.143		3	142.857		1	44.4444		1	222.222		1	42.5532		1	76.9231		0	0		0	0		1	105.263		1	86.3636		2	181.818
	41	1	48.7179		0	0		0	0		2	100		0	0		3	107.143		3	142.857		1	44.4444		1	222.222		1	42.5532		1	76.9231		1	52.6316		0	0		1	105.263		1	86.3636		1	90.9091
	42	1	48.7179		0	0		1	32.2581		1	50		0	0		2	71.4286		2	95.2381		1	44.4444		0	0		1	42.5532		1	76.9231		2	105.263		0	0		1	105.263		1	86.3636		1	90.9091
	43	1	48.7179		0	0		1	32.2581		1	50		0	0		3	107.143		2	95.2381		2	88.8889		0	0		2	85.1064		1	76.9231		0	0		0	0		1	105.263		1	86.3636		1	90.9091
	44	1	48.7179		1	45.4545		1	32.2581		1	50		1	40		3	107.143		2	95.2381		0	0		0	0		2	85.1064		2	153.846		1	52.6316		0	0		1	105.263		1	86.3636		1	90.9091
	45	1	48.7179		0	0		0	0		1	50		1	40		3	107.143		2	95.2381		1	44.4444		1	222.222		3	127.66		0	0		1	52.6316		0	0		1	105.263		2	172.727		1	90.9091
	46	1	48.7179		0	0		1	32.2581		2	100		1	40		3	107.143		2	95.2381		1	44.4444		0	0		2	85.1064		1	76.9231		1	52.6316		0	0		1	105.263		2	172.727		1	90.9091
	47	2	97.4359		1	45.4545		0	0		2	100		1	40		3	107.143		3	142.857		0	0		1	222.222		3	127.66		1	76.9231		1	52.6316		2	62.5		1	105.263		1	86.3636		1	90.9091
	48	2	97.4359		1	45.4545		1	32.2581		1	50		1	40		2	71.4286		3	142.857		0	0		0	0		3	127.66		1	76.9231		0	0		1	31.25		2	210.526		2	172.727		2	181.818
	49	0	0		0	0		0	0		1	50		2	80		3	107.143		3	142.857		1	44.4444		0	0		2	85.1064		1	76.9231		1	52.6316		2	62.5		1	105.263		2	172.727		1	90.9091
	50	1	48.7179		0	0		1	32.2581		2	100		2	80		3	107.143		3	142.857		2	88.8889		1	222.222		1	42.5532		1	76.9231		1	52.6316		2	62.5		1	105.263		2	172.727		1	90.9091
	51	0	0		1	45.4545		1	32.2581		2	100		1	40		2	71.4286		3	142.857		2	88.8889		1	222.222		3	127.66		2	153.846		0	0		3	93.75		1	105.263		2	172.727		0	0
	52	0	0		2	90.9091		1	32.2581		1	50		1	40		3	107.143		3	142.857		1	44.4444		0	0		3	127.66		0	0		1	52.6316		1	31.25		1	105.263		1	86.3636		1	90.9091
	53	0	0		3	136.364		1	32.2581		1	50		0	0		3	107.143		2	95.2381		2	88.8889		1	222.222		3	127.66		1	76.9231		1	52.6316		3	93.75		1	105.263		2	172.727		0	0
	54	0	0		3	136.364		1	32.2581		1	50		1	40		3	107.143		2	95.2381		1	44.4444		1	222.222		5	212.766		1	76.9231		0	0		2	62.5		1	105.263		2	172.727		1	90.9091
	55	0	0		3	136.364		0	0		1	50		1	40		3	107.143		2	95.2381		1	44.4444		0	0		4	170.213		1	76.9231		0	0		2	62.5		1	105.263		2	172.727		0	0
	56	1	48.7179		3	136.364		0	0		2	100		1	40		3	107.143		2	95.2381		2	88.8889		0	0		5	212.766		1	76.9231		2	105.263		1	31.25		1	105.263		2	172.727		0	0
	57	0	0		2	90.9091		0	0		2	100		1	40		3	107.143		3	142.857		2	88.8889		0	0		3	127.66		1	76.9231		0	0		1	31.25		0	0		1	86.3636		1	90.9091
	58	0	0		3	136.364		2	64.5161		1	50		0	0		2	71.4286		2	95.2381		1	44.4444		0	0		3	127.66		1	76.9231		1	52.6316		0	0		1	105.263		1	86.3636		1	90.9091
	59	1	48.7179		3	136.364		2	64.5161		2	100		0	0		3	107.143		2	95.2381		2	88.8889		0	0		3	127.66		1	76.9231		2	105.263		1	31.25		0	0		1	86.3636		1	90.9091
	60	1	48.7179		3	136.364		1	32.2581		2	100		1	40		3	107.143		3	142.857		1	44.4444		1	222.222		4	170.213		2	153.846		2	105.263		2	62.5		1	105.263		2	172.727		1	90.9091
	61	1	48.7179		2	90.9091		0	0		2	100		0	0		3	107.143		2	95.2381		1	44.4444		1	222.222		4	170.213		3	230.769		2	105.263		1	31.25		1	105.263		2	172.727		1	90.9091
	62	0	0		2	90.9091		0	0		2	100		0	0		2	71.4286		3	142.857		1	44.4444		0	0		4	170.213		1	76.9231		2	105.263		2	62.5		0	0		2	172.727		1	90.9091
	63	0	0		3	136.364		1	32.2581		2	100		1	40		0	0		3	142.857		1	44.4444		0	0		3	127.66		1	76.9231		1	52.6316		3	93.75		1	105.263		2	172.727		1	90.9091
	64	0	0		3	136.364		1	32.2581		2	100		0	0		1	35.7143		3	142.857		1	44.4444		0	0		5	212.766		2	153.846		1	52.6316		2	62.5		1	105.263		2	172.727		2	181.818
	65	0	0		3	136.364		1	32.2581		2	100		1	40		0	0		2	95.2381		2	88.8889		0	0		5	212.766		3	230.769		0	0		4	125		1	105.263		2	172.727		2	181.818
	66	2	97.4359		3	136.364		1	32.2581		2	100		2	80		0	0		3	142.857		0	0		0	0		3	127.66		4	307.692		1	52.6316		2	62.5		1	105.263		2	172.727		1	90.9091
	67	2	97.4359		3	136.364		1	32.2581		3	150		2	80		1	35.7143		3	142.857		1	44.4444		0	0		5	212.766		2	153.846		0	0		2	62.5		1	105.263		2	172.727		2	181.818
	68	1	48.7179		3	136.364		1	32.2581		2	100		1	40		1	35.7143		3	142.857		1	44.4444		0	0		4	170.213		4	307.692		1	52.6316		1	31.25		1	105.263		2	172.727		2	181.818
	69	1	48.7179		3	136.364		0	0		1	50		1	40		2	71.4286		3	142.857		1	44.4444		1	222.222		2	85.1064		3	230.769		2	105.263		1	31.25		0	0		2	172.727		2	181.818
	70	2	97.4359		3	136.364		1	32.2581		2	100		1	40		0	0		3	142.857		1	44.4444		1	222.222		2	85.1064		5	384.615		0	0		1	31.25		0	0		2	172.727		2	181.818
	71	3	146.154		3	136.364		2	64.5161		0	0		1	40		0	0		3	142.857		0	0		1	222.222		2	85.1064		2	153.846		1	52.6316		1	31.25		1	105.263		2	172.727		2	181.818
	72	3	146.154		3	136.364		2	64.5161		1	50		0	0		0	0		3	142.857		1	44.4444		1	222.222		1	42.5532		2	153.846		3	157.895		0	0		0	0		2	172.727		2	181.818
	73	5	243.59		4	181.818		1	32.2581		1	50		0	0		1	35.7143		3	142.857		0	0		1	222.222		1	42.5532		3	230.769		1	52.6316		1	31.25		1	105.263		2	172.727		2	181.818
	74	4	194.872		4	181.818		1	32.2581		1	50		0	0		2	71.4286		3	142.857		0	0		2	444.444		1	42.5532		1	76.9231		1	52.6316		2	62.5		1	105.263		2	172.727		2	181.818
	75	3	146.154		3	136.364		2	64.5161		1	50		1	40		2	71.4286		3	142.857		1	44.4444		1	222.222		1	42.5532		3	230.769		1	52.6316		1	31.25		1	105.263		2	172.727		2	181.818
	76	4	194.872		3	136.364		2	64.5161		1	50		0	0		2	71.4286		3	142.857		1	44.4444		1	222.222		0	0		5	384.615		2	105.263		1	31.25		1	105.263		2	172.727		2	181.818
	77	2	97.4359		3	136.364		2	64.5161		2	100		0	0		3	107.143		3	142.857		1	44.4444		1	222.222		1	42.5532		2	153.846		2	105.263		2	62.5		1	105.263		2	172.727		2	181.818
	78	1	48.7179		2	90.9091		1	32.2581		1	50		3	120		3	107.143		3	142.857		0	0		1	222.222		2	85.1064		4	307.692		1	52.6316		1	31.25		1	105.263		1	86.3636		2	181.818
	79	2	97.4359		3	136.364		1	32.2581		1	50		1	40		3	107.143		3	142.857		0	0		1	222.222		1	42.5532		3	230.769		2	105.263		3	93.75		1	105.263		2	172.727		2	181.818
	80	1	48.7179		3	136.364		1	32.2581		1	50		1	40		3	107.143		2	95.2381		0	0		2	444.444		2	85.1064		2	153.846		2	105.263		1	31.25		0	0		2	172.727		2	181.818
	81	2	97.4359		3	136.364		1	32.2581		1	50		1	40		2	71.4286		1	47.619		0	0		1	222.222		1	42.5532		1	76.9231		1	52.6316		2	62.5		1	105.263		2	172.727		1	90.9091
	82	2	97.4359		3	136.364		2	64.5161		2	100		1	40		3	107.143		1	47.619		1	44.4444		1	222.222		0	0		3	230.769		3	157.895		2	62.5		1	105.263		1	86.3636		1	90.9091
	83	3	146.154		3	136.364		3	96.7742		2	100		1	40		3	107.143		0	0		1	44.4444		1	222.222		1	42.5532		3	230.769		1	52.6316		1	31.25		1	105.263		2	172.727		1	90.9091
	84	1	48.7179		3	136.364		2	64.5161		2	100		2	80		3	107.143		1	47.619		1	44.4444		0	0		1	42.5532		3	230.769		2	105.263		3	93.75		1	105.263		1	86.3636		1	90.9091
	85	2	97.4359		2	90.9091		2	64.5161		1	50		2	80		2	71.4286		0	0		2	88.8889		1	222.222		2	85.1064		2	153.846		2	105.263		2	62.5		1	105.263		2	172.727		1	90.9091
	86	1	48.7179		3	136.364		1	32.2581		2	100		1	40		2	71.4286		0	0		2	88.8889		1	222.222		1	42.5532		3	230.769		1	52.6316		1	31.25		0	0		1	86.3636		2	181.818
	87	2	97.4359		3	136.364		1	32.2581		1	50		0	0		2	71.4286		2	95.2381		2	88.8889		1	222.222		1	42.5532		4	307.692		1	52.6316		3	93.75		1	105.263		1	86.3636		1	90.9091
	88	1	48.7179		2	90.9091		2	64.5161		2	100		0	0		1	35.7143		2	95.2381		1	44.4444		1	222.222		1	42.5532		4	307.692		2	105.263		2	62.5		1	105.263		1	86.3636		1	90.9091
	89	1	48.7179		2	90.9091		1	32.2581		1	50		0	0		2	71.4286		2	95.2381		1	44.4444		1	222.222		1	42.5532		4	307.692		1	52.6316		2	62.5		1	105.263		2	172.727		1	90.9091
	90	1	48.7179		3	136.364		2	64.5161		2	100		0	0		1	35.7143		2	95.2381		1	44.4444		1	222.222		1	42.5532		2	153.846		1	52.6316		2	62.5		1	105.263		1	86.3636		1	90.9091
	91	1	48.7179		3	136.364		2	64.5161		1	50		1	40		1	35.7143		2	95.2381		1	44.4444		2	444.444		1	42.5532		3	230.769		1	52.6316		2	62.5		1	105.263		2	172.727		2	181.818
	92	2	97.4359		2	90.9091		4	129.032		1	50		1	40		1	35.7143		1	47.619		1	44.4444		1	222.222		1	42.5532		2	153.846		2	105.263		5	156.25		1	105.263		1	86.3636		1	90.9091
	93	2	97.4359		3	136.364		1	32.2581		1	50		1	40		0	0		2	95.2381		1	44.4444		1	222.222		1	42.5532		4	307.692		2	105.263		1	31.25		1	105.263		1	86.3636		1	90.9091
	94	0	0		3	136.364		1	32.2581		2	100		2	80		1	35.7143		2	95.2381		1	44.4444		1	222.222		2	85.1064		2	153.846		2	105.263		2	62.5		2	210.526		2	172.727		2	181.818
	95	1	48.7179		2	90.9091		2	64.5161		1	50		0	0		1	35.7143		2	95.2381		1	44.4444		1	222.222		1	42.5532		2	153.846		2	105.263		4	125		1	105.263		2	172.727		2	181.818
	96	0	0		3	136.364		2	64.5161		2	100		2	80		2	71.4286		2	95.2381		1	44.4444		1	222.222		1	42.5532		4	307.692		2	105.263		2	62.5		1	105.263		2	172.727		2	181.818
	97	2	97.4359		3	136.364		1	32.2581		2	100		1	40		1	35.7143		2	95.2381		1	44.4444		1	222.222		0	0		1	76.9231		1	52.6316		3	93.75		1	105.263		2	172.727		2	181.818
	98	1	48.7179		2	90.9091		1	32.2581		2	100		2	80		1	35.7143		2	95.2381		0	0		1	222.222		1	42.5532		3	230.769		2	105.263		2	62.5		0	0		2	172.727		2	181.818
	99	1	48.7179		3	136.364		0	0		2	100		0	0		1	35.7143		2	95.2381		2	88.8889		1	222.222		1	42.5532		2	153.846		1	52.6316		3	93.75		1	105.263		2	172.727		3	272.727
	100	0	0		2	90.9091		1	32.2581		2	100		0	0		2	71.4286		2	95.2381		1	44.4444		1	222.222		1	42.5532		2	153.846		1	52.6316		2	62.5		1	105.263		1	86.3636		2	181.818
	101	2	97.4359		1	45.4545		0	0		2	100		2	80		1	35.7143		2	95.2381		1	44.4444		1	222.222		0	0		1	76.9231		3	157.895		2	62.5		1	105.263		2	172.727		3	272.727
	102	1	48.7179		2	90.9091		0	0		2	100		3	120		3	107.143		2	95.2381		1	44.4444		1	222.222		1	42.5532		1	76.9231		2	105.263		4	125		1	105.263		2	172.727		2	181.818
	103	2	97.4359		2	90.9091		0	0		1	50		1	40		2	71.4286		2	95.2381		1	44.4444		1	222.222		1	42.5532		1	76.9231		2	105.263		2	62.5		0	0		2	172.727		3	272.727
	104	1	48.7179		2	90.9091		0	0		1	50		2	80		0	0		2	95.2381		1	44.4444		1	222.222		1	42.5532		2	153.846		3	157.895		2	62.5		1	105.263		3	259.091		3	272.727
	105	0	0		3	136.364		0	0		1	50		3	120		0	0		3	142.857		1	44.4444		1	222.222		0	0		2	153.846		2	105.263		2	62.5		1	105.263		2	172.727		3	272.727
	106	0	0		2	90.9091		0	0		1	50		1	40		0	0		3	142.857		1	44.4444		1	222.222		1	42.5532		2	153.846		0	0		1	31.25		2	210.526		3	259.091		3	272.727
	107	0	0		2	90.9091		0	0		1	50		2	80		0	0		4	190.476		1	44.4444		1	222.222		1	42.5532		2	153.846		2	105.263		5	156.25		1	105.263		2	172.727		4	363.636
	108	1	48.7179		2	90.9091		1	32.2581		1	50		2	80		0	0		3	142.857		1	44.4444		1	222.222		1	42.5532		4	307.692		2	105.263		0	0		1	105.263		2	172.727		4	363.636
	109		0		3	136.364		0	0		1	50		2	80		0	0		4	190.476		1	44.4444		1	222.222		0	0		3	230.769		1	52.6316		2	62.5		2	210.526		2	172.727		4	363.636
	110		0		3	136.364		1	32.2581		1	50		3	120		0	0		4	190.476		1	44.4444		1	222.222		1	42.5532		1	76.9231		1	52.6316		1	31.25		1	105.263		2	172.727		5	454.545
	111		0		3	136.364		0	0		0	0		2	80		0	0		4	190.476		1	44.4444		1	222.222		1	42.5532		3	230.769		0	0		1	31.25		1	105.263		2	172.727		4	363.636
	112		0		3	136.364		1	32.2581		1	50		3	120		2	71.4286		4	190.476		2	88.8889		1	222.222		1	42.5532		2	153.846		2	105.263		2	62.5		1	105.263		2	172.727		4	363.636

## Sheet: Figure 3E
Number of Action potentials required to induce BF and STP-SE (30 X 10Hz protocol)
(note the data for BF is taken from Figure 1E)
		MOUSE				HUMAN						MOUSE			MOUSE					MOUSE			MOUSE
		BF	STP-SE			BF	STP-SE					BF			STP_SE					BF			STP_SE
1		480	290			520	270
2		510	450			680	560				Shapiro Wilk Normaiity Test				Shapiro Wilk Normaiity Test				Shapiro Wilk Normaiity Test				Shapiro Wilk Normaiity Test
3		700	430			480	540				p	0.135			p	0.14			p	0.81			p	0.13
4		540	480			610	500				W	0.97			W	0.89			W	0.96			W	0.79
5		430	350			670
6		410	310			940					NORMALLY DISTRUBUTED				NORMALLY DISTRUBUTED				NORMALLY DISTRUBUTED				NORMALLY DISTRUBUTED
7		450	320			830
8		260	290			1270
9		490	350			620
10		660				960
11		540				690
12		660				740
13		570									MOUSE Number of action potentials required for induction BF VERSus STPSE								MOUSE Number of action potentials required for induction BF VERSus STPSE
14		600
15		540									Two-tailed unpaired t-test								Two-tailed unpaired t-test
16		570
17		550									equal variance assumed								equal variance assumed
18		640									t-statistic		3.66						t-statistic		2.39
19		380									DF		77						DF		14
20		590									P value		0.0004						P value		0.031
21		580
22		410
23		880
24		390
25		480
26		280
27		480
28		510
29		480
30		450
31		340
32		520
33		490
34		480
35		400
36		380
37		550
38		430
39		350
40		430
41		560
42		310
43		450
44		400
45		450
46		470
47		350
48		510
49		510
50		430
51		550
52		500
53		470
54		520
55		630
56		820
57		620
58		600
59		600
60		590
61		680
62		350
63		520
64		580
65		480
66		440
67		470
68		530

## Sheet: Figure 3H,I
AP Paramaters Before and After Induction of STP_SE
		MOUSE									HUMAN
		AP THRESHOLD				AP latency					AP THRESHOLD			AP latency
		baseline	STP-SE			baseline	STP-SE				baseline	STP-SE		baseline	STP-SE
		-28.8	-39			99	5.7				-33.6	-40.1		140	17
		-28.5	-40.2			181	6				-35	-41		144	44
		-27.8	-35.5			134	10				-35.2	-41.4		138	47
		-30.1	-38.2			88	11				-42	-49		172	21
		-31.8	-44.7			141	6
		-27	-36.2			88	18
		-28.7	-45.6			106	36
		-26.4	-36.8			105	16
		-32	-45			96	10
	AP THRESHOLD				AP latency						AP THRESHOLD			AP latency
	Shapiro Wilk Normaiity Test				Shapiro Wilk Normaiity Test						Shapiro Wilk Normaiity Test			Shapiro Wilk Normaiity Test
	p	0.52			p	0.063					p	0.14		p	0.09
	W	0.93			W	0.84					W	0.79		W	0.76
	NORMALLY DISTRUBUTED				NORMALLY DISTRUBUTED						NORMALLY DISTRUBUTED			NORMALLY DISTRUBUTED
	Two-tailed paired t-test				Two-tailed paired t-test						Two-tailed paired t-test			Two-tailed paired t-test
	t-statistic		11.6			8.6					t-statistic	29.5			8.7
	DF		8			8					DF	3			3
	P value		2.8e-06			2.5e-05					P value	8.5e-05			0.003
