# Supplementary material for: Activity-dependent tuning of intrinsic excitability in mouse and human neurogliaform cells
Source: eLife journal article supplement (doi:10.7554/elife.57571), 2020-06-04
Supplement: supp [file elife-57571-supp-v1.zip › elife_poa_e57571_Figure_4_source_data_1.xlsx]

## Sheet: Figure 4C
	Voltage Step		1	2	3	4	5	7		Voltage Step
			Peak								Ave	SEM
	-60		17.3568	12.4614	14.7336	19.4216	18.828	5.40657		-60	14.7013	2.34754
	-55		9.18766	9.20482	17.6638	2.63572	19.748	10.3415		-55	11.4636	2.8039
	-50		7.75105	16.4912	21.7682	22.0839	11.6985	13.8221		-50	15.6025	2.5367
	-45		13.9459	33.86	10.871	39.0878	19.5426	11.5278		-45	21.4725	5.4237
	-40		22.6237	77.2337	10.555	64.4461	45.849	23.2518		-40	40.6599	11.7729
	-35		41.8273	171.517	43.8266	148.485	139.207	69.772		-35	102.439	25.6283
	-30		108.956	279.073	104.359	311.09	296.921	135.425		-30	205.971	44.443
	-25		217.577	424.143	202.332	547.783	527.868	201.266		-25	353.495	74.2004
										-20
			sustained								Ave	SEM
	-60		1.90581	-4.30441	4.59611	-5.98205	-5.7073	-2.86442		-60	-2.05938	1.94321
	-55		-5.79364	-10.1212	-12.5854	-11.6781	-3.68186	-7.89886		-55	-8.62653	1.55208
	-50		-3.6454	-6.01303	-9.7227	-7.07276	1.85459	-5.31904		-50	-4.98639	1.74983
	-45		-4.6494	-3.10468	-3.95064	2.41726	-2.46116	-3.43965		-45	-2.53138	1.13398
	-40		-4.24783	6.29436	-4.59221	7.21032	1.03181	-0.548077		-40	0.858062	2.25998
	-35		4.85257	22.8687	17.1939	19.0132	12.5687	11.2928		-35	14.6316	2.8611
	-30		26.6133	46.7238	36.4723	43.1598	32.1164	34.1443		-30	36.5383	3.29474
	-25		49.202	96.4307	60.1357	106.296	65.9376	79.5553		-25	76.2595	9.83572

## Sheet: Figure 4D
Pharmacological block of subthreshold K+-current integral
	DTX							LOW 4-AP						HIGH 4-AP							SUMMARY
			Subthreshold IK Integral						Subthreshold IK Integral						Subthreshold IK Integral
			Baseline	Drug	%Baseline				Baseline	Drug	%Baseline				Baseline	Drug	%Baseline				DTX	low 4-AP	High 4-AP
1	DTXalpha 100nM		17271	20013	115.876		1	100mM 4AP	66267	49071	74.0504		1	1mM 4AP	15018	5244	34.9181
2	DTXalpha 100 nM		13197	14567	110.381		2	100mM 4AP	28353	24413	86.1038		2	1mM 4AP	14020	9876	70.4422				115.876	74.05	34.918
3	DTXalpha 200nM		16288	12527	76.9094		3	100mM 4AP	56969	36801	64.5983		3	1mM 4AP	35095	26725	76.1504				110.381	86.104	70.442
4	DTXalpha 200nM		16867	13265	78.6447		4	100mM 4AP	54476	40250	73.8857		4	1mM 4AP	18866	0	0				76.909	64.598	76.15
5	DTXalpha 200nM		17021	14598	85.7646		5	100mM 4AP	85350	87669	102.717		5	1mM 4AP	22169	9762	44.0345				78.645	73.886	0
							6	100mM 4AP	54949	54844	99.8089		6	3mM 4AP	16707	2928	17.5256				85.765	102.717	44.034
							7	100mM 4AP	45965	31772	69.1222		7	1mM 4AP	34283	14714	42.9192					99.809	17.526
													8	2mM 4AP	10562	5324	50.4071					69.122	42.919
													9	1mM 4AP	20315	13318	65.5575						50.407
													10	1mM 4AP	18692	5947	31.8158						65.557
													11	3mM 4AP	17444	2807	16.0915						31.816
																							16.091
																				Ave	93.5152	81.4694	40.8964
																				STDEV	8.18967	5.68821	7.24913
			Shapiro Wilk Normaiity Test					Shapiro Wilk Normaiity Test							Shapiro Wilk Normaiity Test					n	5	7	11
			p	0.041				p	0.93						p	0.047
			W	0.738				W	0.96						W	0.85
			NOT NORMALLY DISTRUBUTED					NORMALLY DISTRUBUTED							NOT NORMALLY DISTRUBUTED
			WILCOXIN SIGNED RANK TEST					PAIRED TWO TAIL T-test							WILCOXIN SIGNED RANK TEST
			Z	0.81					t Statistic	2.86439					Z	2.89
			W	11					DF	6					W	66
			p value	0.44					p value	0.02864					p value	0.000976
cell

## Sheet: Figure 4I
COMPARISON OF THRESHOLD AND SPIKE LATENCY BETWEEN STP-SE AND PHARMACOLOGICAL MANIPULATIONS
																								Ave	SEM	n
STP-SE
threshold	baseline	-28.8	-28.5	-27.8	-30.1	-31.8	-27	-28.7	-26.4	-32														-29.0111	0.542686	9
	STPSE	-39	-40.2	-35.5	-38.2	-44.7	-36.2	-45.6	-36.8	-45														-40.1333	1.10723	9
	delta	-10.2	-11.7	-7.7	-8.1	-12.9	-9.2	-16.9	-10.4	-13														-11.1222	0.79853	9
Latency	baseline	99	181	134	88	141	88	106	105	96														115.333	8.57546	9
	STPSE	5.7	6	10	11	6	18	36	16	10														13.1889	2.66019	9			SUMMARY
	% decrease	94.2424	96.6851	92.5373	87.5	95.7447	79.5455	66.0377	84.7619	89.5833														87.4042	2.7012	9
																															% decrease latency		delta threshold			n
																															Ave	STD	Ave	STD
																													STP-SE		87.4042	2.7012	-11.1222	0.79853		9
																													High 4-AP		70.6866	4.97966	-10.6167	1.99057		12
																													DTX/Low 4AP		52.5143	7.78412	-6.83158	0.76096		19
High 4-AP																													INTRA-4-AP		75.0945	5.91636	-9.32857	0.712386		7
threshold	baseline	-30.3	-28.7	-27.9	-26.9	-30.9	-29.6	-26	-28.9	-27.9	-28.5	-28.3	-29.4											-28.6083	0.38	12
	High 4-AP	-42.3	-36.9	-37.9	-54.6	-35.5	-33	-39	-32.3	-29.9	-43.7	-41	-44.6											-39.225	1.85612	12
	delta	-12	-8.2	-10	-27.7	-4.6	-3.4	-13	-3.4	-2	-15.2	-12.7	-15.2											-10.6167	1.99057	12
Latency	baseline	311	526	459	303	114	141	385	525	555	686	433	345											398.583	46.6594	12
	High 4-AP	59.4	174	149	117	77	54	24	182	188	71	162	155											117.7	16.01	12
	% decrease	80.9003	66.9202	93.8998	61.3861	32.4561	80.1418	93.7662	65.3333	66.1261	89.6501	62.5866	55.0725											70.6866	4.97966	12
DTX
threshold	baseline	-33	-31.8	-29	-32	-33	-33	-27	-29	-27	-32													-30.68	0.55995	10
	DTX/LOW 4AP	-40	-45	-33	-42	-40	-42	-33	-32	-35	-33													-37.5	1.09891	10
	delta	-7	-13.2	-4	-10	-7	-9	-6	-3	-8	-1													-6.82	0.816912	10
Latency	baseline	630	560	666	400	909	924	506	438	650	708													639.1	40.5567	10
	DTX/LOW 4AP	429	294	330	157	354	318	733	200	633	727													417.5	47.9955	10
	% decrease	31.9048	47.5	50.4505	60.75	61.0561	65.5844	-44.8617	54.3379	2.61538	102.684													43.2021	9.17372	10
LOW 4AP		-30.1	-29	-22.2	-27.6	-27	-28.2	-29	-33	-30.8														-28.5444	0.68548	9
threshold	baseline	-35.9	-34.8	-31.1	-31.2	-32.6	-30.9	-42	-43	-37														-35.3889	1.05353	9
	DTX/LOW 4AP	-5.8	-5.8	-8.9	-3.6	-5.6	-2.7	-13	-10	-6.2														-6.84444	0.743048	9
	delta
		143	266	860	960	404	633	227	724	567														531.556	66.4188	9
Latency	baseline	59	230	138	145	247	137	95	172	153														152.889	13.5411	9
	DTX/LOW 4AP	58.7413	13.5338	83.9535	84.8958	38.8614	78.357	58.1498	76.2431	73.0159														62.8613	5.44172	9
	% decrease
INTRA 4-AP	INTERLEAVED EXPTS
threshold	KGLUC CTRL		565	259	604		742	608	319	685														540.286	41.778	7
	KGLUC INTRA4-AP		66	213	129		127	43	67	95														105.714	13.122	7
	delta		88.3186	17.7606	78.6424		82.8841	92.9276	78.9969	86.1314														75.0945	5.91636	7
Latency	KGLUC CTRL		-28	-28	-31		-31.6	-28.8	-26	-26.5														-28.5571	0.483746	7
	KGLUC INTRA4-AP		-41	-41	-41		-38	-35.1	-36.6	-32.5														-37.8857	0.769647	7
	% decrease		-13	-13	-10		-6.4	-6.3	-10.6	-6														-9.32857	0.712386	7
