# Supplementary material for: Activity-dependent tuning of intrinsic excitability in mouse and human neurogliaform cells
Source: eLife journal article supplement (doi:10.7554/elife.57571), 2020-06-04
Supplement: supp [file elife-57571-supp-v1.zip › elife_poa_e57571_Figure_5_source_data_1.xlsx]

## Sheet: Figure 5B,C
INCREASE IN EXCITABILITY UPON PHARMACOLOGY CF WITH STP-SE
Total no of action potential in input/output curve (current injections 0 - 225pA, delta 25pA)
FIG 5B
	1	2	3	4	5	6	7	8	9	10	11	12	13	14	15	16	17		% increase in action potentia output
STPSE																			Ave	SEM
baseline	84	49	88	84	70	100	28	56											69.875	8.46935
STP-SE	147	136	187	169	101	163	126	235											158	14.5123
%increase	175	277.551	212.5	201.19	144.286	163	450	419.643											255.396	41.7182
HIGH 4-AP
baseline	32	36	27	17	133	156	158												79.8571	24.7304
high-4AP	59	47	80	72	214	159	156												112.429	24.0068
%increase	184.375	130.556	296.296	423.529	160.902	101.923	98.7342												199.474	45.1731
DTX/low4-AP
baseline	21	50	60	60	90	161	65	86	133	96	168	116	106	123	108	113	138		99.6471	9.66495
DTX/low4AP	52	110	60	60	70	175	129	115	159	155	113	83	155	256	108	60	113		116.059	12.858
%increase	247.619	220	100	100	77.7778	108.696	198.462	133.721	119.549	161.458	67.2619	71.5517	146.226	208.13	100	53.0973	81.8841		129.143	14.291
FIG 5C
																			Total no of spikes
KGLUC CTRL	63	20	63	32	64	40	47												47	6.55381
KGLUC INTRA 4-AP	79	121	102	162	102	103	111.5												111.5	9.6972
% Inrease in Action Potential Output
	STP-SE					HIGH 4-AP					DTX					low 4-AP
	175					184.375					247.619					119.549
	277.551					130.556					220					161.458
	212.5					296.296					100					67.2619
	201.19					423.529					100					71.5517
	144.286					160.902					77.7778					146.226
	163					101.923					108.696					208.13
	450					98.7342					198.462					100
	419.643										133.721					53.0973
																81.8841
Shapiro Wilk Normaiity Test					Shapiro Wilk Normaiity Test					Shapiro Wilk Normaiity Test						Shapiro Wilk Normaiity Test
p	0.07				p	0.12				p	0.19					p	0.54
W	0.83				W	0.84				W	0.88					W	0.93
NORMALLY DISTRUBUTED					NORMALLY DISTRUBUTED					NORMALLY DISTRUBUTED						NORMALLY DISTRUBUTED
					STPSE VERSUS HIGH-4AP					STP-SE PVERSUS DTX						STP-SE VERSUS Low4-AP
					Unpaired two-tailed T-test					Unpaired two-tailed T-test						Unpaired two-tailed T-test
					equal variance assumed					equal variance assumed						equal variance assumed
					t	0.91				t	3.32					t	2.26
					DF	13				DF	15					DF	14
					p value	0.38				p value	0.011					p value	0.045

## Sheet: Fig 5G
																													1st AP Latency		2nd AP Latency		RATIO
	DELTA TIME (s)		1				2				3				4				5				6					DELTA TIME (s)	AVE	SEM	AVE	SEM	AVE	SEM		n
			1stAP latency	2nd AP Latency	ratio		1stAP latency	2nd AP Latency	ratio		1stAP latency	2nd AP Latency	ratio		1stAP latency	2nd AP Latency	ratio		1stAP latency	2nd AP Latency	ratio		1stAP latency	2nd AP Latency	ratio
	100		190	95	0.5		217	77	0.354839		190	67	0.352632		179	63	0.351955		156	83	0.532051		157	90	0.573248			100	181.5	9.41895	79.1667	5.15375	0.444121	0.0417789		6
	300		156	97	0.621795		170	103	0.605882		205	83	0.404878		179	95	0.530726		177	97	0.548023		127	101	0.795276			300	169	10.6364	96	2.86356	0.58443	0.0525232		6
	500		150	108	0.72		154	85	0.551948		142	101	0.711268		183	91	0.497268		220	145	0.659091		191	85	0.445026			500	173.333	12.2247	102.5	9.27991	0.597433	0.0472978		6
	700		138	107	0.775362		170	122	0.717647		221	140	0.633484		144	86	0.597222		187	143	0.764706		134	87	0.649254			700	165.667	13.8724	114.167	10.2353	0.689613	0.0300517		6
	900		178	123	0.691011		170	114	0.670588		168	142	0.845238		149	121	0.812081		153	177	1.15686		162	157	0.969136			900	163.333	4.45471	139	9.96995	0.857486	0.0745986		6
	1100		144	135	0.9375		137	118	0.861314		135	118	0.874074		169	107	0.633136		179	159	0.888268		240	154	0.641667			1100	167.333	16.2576	131.833	8.63874	0.805993	0.0543573		6
	1300		177	140	0.79096		176	148	0.840909		190	208	1.09474		143	112	0.783217		220	189	0.859091		200	171	0.855			1300	184.333	10.6165	161.333	14.2634	0.870652	0.0467165		6
	1500		173	160	0.924855		144	144	1		180	179	0.994444		196	156	0.795918		220	239	1.08636		225	225	1			1500	189.667	12.4704	183.833	16.0113	0.96693	0.0400932		6
	DELTA TIME (s)		1				2				3				4				5				6
			IKA peak 1	IKA peak 2	ratio		IKA peak 1	IKA peak 2	ratio		IKA peak 1	IKA peak 2	ratio		IKA peak 1	IKA peak 2	ratio		IKA peak 1	IKA peak 2	ratio		IKA peak 1	IKA peak 2	ratio			DELTA TIME (s)	IKA peak 1		IKA peak 2		RATIO
																													AVE	SEM	AVE	SEM	AVE	SEM
	25		474.098	327	0.689731		493.278	315	0.638586		469.327	309	0.65839		672.997	360	0.534921		277.693	165	0.594181		444	284	0.63964			25	471.899	293.333	0.625908	0.0269599	0.625908	0.0221833		6
	225		472.852	423	0.894572		505.418	392	0.775596		454.753	412	0.905986		650.626	505	0.776175		270.378	201	0.743404		468	344	0.735043			225	470.338	379.5	0.805129	0.0336974	0.805129	0.0308787		6
	425		472.069	437	0.925712		497.386	416	0.836372		460.184	408	0.886601		620.427	538	0.867144		277.793	219	0.788358		423	385	0.910165			425	458.477	400.5	0.869059	0.0231992	0.869059	0.0206493		6
	625		487.214	458	0.940038		496.849	446	0.897657		442.506	407	0.919761		608.452	552	0.90722		271.672	244	0.898143		462	382	0.82684			625	461.449	414.833	0.898276	0.00795417	0.898276	0.0156942		6
	825		494.164	470	0.951101		484.527	453	0.934933		433.751	404	0.931411		552.309	560	1.01392		228.743	212	0.926806		459	421	0.917211			825	442.082	420	0.945898	0.0161009	0.945898	0.0143437		6
	1025		516.601	500	0.967865		504.338	455	0.902173		479.029	438	0.91435		561.065	529	0.94285		214.453	195	0.90929		411	422	1.02676			1025	447.748	423.167	0.943882	0.0122694	0.943882	0.0193684		6
	1225		510.911	510	0.998217		454.713	440	0.967643		454.598	428	0.941491		492.975	490	0.993966		230.071	193	0.838872		425	435	1.02353			1225	428.045	416	0.96062	0.0291305	0.96062	0.0269078		6
	1425		504.708	489	0.968878		441.951	436	0.986536		439.149	418	0.951841		490.685	472	0.961921		227.015	192	0.845758		449	402	0.895323			1425	425.418	401.5	0.935043	0.0249572	0.935043	0.0218711		6

## Sheet: Fig5H
		1	2	3	4	5	6																			DELTA TIME (s)	Increase in total number of APs
DELTA TIME (s)		% AP increase	% AP increase	% AP increase	% AP increase	% AP increase	% AP increase																				Ave	SEM
100		150	200	400	250	150	300																			100	241.667	39.6162
300		200	150	300	250	300	150																			300	225	28.1366
500		150	100	300	150	200	150																			500	175	28.1366
700		150	150	150	200	200	200																			700	175	11.1803
900		150	200	150	150	100	100																			900	141.667	15.3659
1100		150	100	100	150	200	200																			1100	150	18.2574
1300		300	100	100	100	100	50																			1300	125	35.9398
1500		100	100	200	200	100	100																			1500	133.333	21.0819
DELTA TIME (s)																										DELTA TIME (s)	integral1		integral2		%IK integral block
																											Ave	SEM	Ave	SEM	Ave	SEM
	integral1	integral2	%IK integral block		integral1	integral2	%IK integral block		integral1	integral2	%IK integral block		integral1	integral2	%IK integral block		integral1	integral2	%IK integral block
25	22749	12994	42.881		31195.6	19360.7	37.9378		23616.4	12810.7	45.7549		44943.2	30488	32.1632		18416.7	13781.2	25.1701							25	28184.2	4667.67	17886.9	3372.87	36.7814	3.70956
225	24049	15749	34.5129		34228.5	23079.1	32.5734		22859.8	16635.1	27.2299		45299.4	35117.8	22.4763		17975.6	13188.9	26.6289							225	28882.4	4882.07	20754	3943.17	28.6843	2.16767
425	24222	18248	24.6635		33278.5	23649.6	28.9343		23410.6	17522.4	25.1517		43490.6	33590.2	22.7645		17633.2	13241.3	24.9071							425	28407	4526.58	21250.3	3500.6	25.2842	1.00541
625	24948	20182	19.1037		32923.5	22266.2	32.37		22830.6	17002.8	25.5261		43161.7	36291.1	15.9183		16099.5	13118.7	18.515							625	27992.7	4646.38	21772.2	3944.62	22.2866	2.97556
825	25224.5	21510.2	14.725		32236.1	23458.8	27.228		22310.9	16710.5	25.1015		41626.8	36465.1	12.4001		17377.1	13858.9	20.246							825	27755.1	4220.49	22400.7	3905.5	19.9401	2.86266
1025	26862.9	23836.2	11.2672		34751.8	28758.6	17.2457		24394.1	20211.2	17.147		41543.3	35409	14.7661		16132	13899.8	13.8371							1025	28736.8	4367.14	24423	3662.72	14.8526	1.11546
1225	28025	25135	10.3122		31562.1	26562.6	15.8401		23234.7	19775	14.89		38088.6	35409	7.03521		16796.6	13898.3	17.2552							1225	27541.4	3616.92	24156	3590.22	13.0665	1.90427
1425	28508.6	24363.5	14.5398		30372.7	27701.3	8.79529		22463.7	19033.2	15.2712		38478.5	34205.2	11.1058		15929	13710.1	13.9296							1425	27150.5	3797.62	23802.7	3523.72	12.7283	1.21021

## Sheet: Figure 5I
	1				2			3			4			5				1			2			3			4			5					K gluc Control		Kgluc Intra 4-AP
	Sweep	K gluc Control			K gluc Control			K gluc Control			K gluc Control			K gluc Control				Kgluc Intra 4-AP			Kgluc Intra 4-AP			Kgluc Intra 4-AP			Kgluc Intra 4-AP			Kgluc Intra 4-AP					% Baseline		% Baseline
		spikes	% baseline		spikes	% baseline		spikes	% baseline		spikes	% baseline		spikes	% baseline			spikes	% baseline		spikes	% baseline		spikes	% baseline		spikes	% baseline		spikes	% baseline				AVE	SEM	AVE	SEM
Baseline	1	3	122.449		3	109.091		2	88.8889		2	160		4	102.564			2	72.7273		1	57.1429		3	142.857		2	181.818		2	67.7966				116.599	12.1224	104.468	24.5446
	2	3	122.449		3	109.091		2	88.8889		2	160		7	179.487			3	109.091		2	114.286		3	142.857		2	181.818		3	101.695				131.983	16.6037	129.949	14.7237
	3	1	40.8163		2	72.7273		2	88.8889		2	160		3	76.9231			3	109.091		2	114.286		3	142.857		2	181.818		3	101.695				87.8711	19.7065	129.949	14.7237
	4	2	81.6327		2	72.7273		3	133.333		1	80		3	76.9231			3	109.091		2	114.286		2	95.2381		2	181.818		3	101.695				88.9233	11.2057	120.426	15.6851
	5	3	122.449		3	109.091		1	44.4444		1	80		3	76.9231			3	109.091		2	114.286		2	95.2381		1	90.9091		3	101.695				86.5815	13.6112	102.244	4.29969
	6	4	163.265		2	72.7273		2	88.8889		2	160		7	179.487			3	109.091		2	114.286		2	95.2381		1	90.9091		3	101.695				132.874	21.6617	102.244	4.29969
	7	2	81.6327		2	72.7273		3	133.333		2	160		3	76.9231			4	145.455		3	171.429		2	95.2381		1	90.9091		3	101.695				104.923	17.612	120.945	15.9419
	8	3	122.449		3	109.091		2	88.8889		1	80		4	102.564			3	109.091		2	114.286		2	95.2381		1	90.9091		3	101.695				100.599	7.46606	102.244	4.29969
	9	2	81.6327		3	109.091		1	44.4444		1	80		5	128.205			3	109.091		2	114.286		2	95.2381		1	90.9091		3	101.695				88.6746	14.2489	102.244	4.29969
	10	2	81.6327		2	72.7273		2	88.8889		1	80		4	102.564			3	109.091		2	114.286		2	95.2381		1	90.9091		3	101.695				85.1626	5.05197	102.244	4.29969
	11	2	81.6327		3	109.091		3	133.333		1	80		3	76.9231			2	72.7273		2	114.286		2	95.2381		1	90.9091		3	101.695				96.196	10.9346	94.971	6.81771
	12	3	122.449		3	109.091		2	88.8889		1	80		4	102.564			2	72.7273		2	114.286		2	95.2381		1	90.9091		3	101.695				100.599	7.46606	94.971	6.81771
	13	2	81.6327		3	109.091		2	88.8889		1	80		5	128.205			3	109.091		1	57.1429		2	95.2381		1	90.9091		3	101.695				97.5635	9.24475	90.8152	8.96038
	14	3	122.449		4	145.455		3	133.333		1	80		4	102.564			3	109.091		1	57.1429		2	95.2381		1	90.9091		3	101.695				116.76	11.5828	90.8152	8.96038
	15	2	81.6327		3	109.091		2	88.8889		1	80		3	76.9231			3	109.091		1	57.1429		2	95.2381		1	90.9091		3	101.695				87.3071	5.78989	90.8152	8.96038
	16	2	81.6327		3	109.091		1	44.4444		1	80		3	76.9231			2	72.7273		1	57.1429		2	95.2381		1	90.9091		3	101.695				78.4182	10.2716	83.5424	8.16846
	17	3	122.449		3	109.091		4	177.778		1	80		4	102.564			3	109.091		1	57.1429		2	95.2381		1	90.9091		3	101.695				118.376	16.3617	90.8152	8.96038
	18	2	81.6327		2	72.7273		2	88.8889		1	80		3	76.9231			3	109.091		2	114.286		2	95.2381		1	90.9091		3	101.695				80.0344	2.68358	102.244	4.29969
	19	3	122.449		3	109.091		4	177.778		1	80		3	76.9231			2	72.7273		3	171.429		2	95.2381		0	0		3	101.695				113.248	18.2907	88.2178	27.5475
	20	2	81.6327		3	109.091		2	88.8889		1	80		3	76.9231			2	72.7273		1	57.1429		1	47.619		0	0		3	101.695				87.3071	5.78989	55.8368	16.6962
Induction Start	21	1	40.8163		2	72.7273		1	44.4444		1	80		4	102.564			1	36.3636		2	114.286		1	47.619		0	0		3	101.695				68.1104	11.5212	59.9927	21.2101
	22	1	40.8163		5	181.818		0	0		0	0		3	76.9231			1	36.3636		3	171.429		1	47.619		0	0		2	67.7966				59.9115	33.6853	64.6416	28.8802
	23	2	81.6327		4	145.455		2	88.8889		1	80		6	153.846			0	0		1	57.1429		1	47.619		0	0		2	67.7966				109.964	16.3247	34.5117	14.4464
	24	1	40.8163		3	109.091		0	0		0	0		4	102.564			1	36.3636		1	57.1429		1	47.619		0	0		2	67.7966				50.4943	23.8095	41.7844	11.6659
	25	0	0		3	109.091		0	0		0	0		5	128.205			1	36.3636		2	114.286		1	47.619		2	181.818		1	33.8983				47.4592	29.2194	82.797	28.7935
	26	1	40.8163		3	109.091		0	0		0	0		4	102.564			2	72.7273		2	114.286		1	47.619		2	181.818		2	67.7966				50.4943	23.8095	96.8494	23.8467
	27	1	40.8163		1	36.3636		2	88.8889		0	0		6	153.846			2	72.7273		3	171.429		1	47.619		2	181.818		2	67.7966				63.983	26.5415	108.278	28.265
	28	1	40.8163		3	109.091		2	88.8889		0	0		4	102.564			1	36.3636		3	171.429		1	47.619		1	90.9091		1	33.8983				68.272	20.8351	76.0437	25.9595
	29	2	81.6327		0	0		3	133.333		0	0		5	128.205			2	72.7273		3	171.429		1	47.619		2	181.818		1	33.8983				68.6342	29.4321	101.498	31.3385
	30	0	0		0	0		1	44.4444		0	0		4	102.564			2	72.7273		4	228.571		1	47.619		2	181.818		1	33.8983				29.4017	20.2144	112.927	38.8885
	31	0	0		2	72.7273		1	44.4444		0	0		7	179.487			2	72.7273		4	228.571		1	47.619		1	90.9091		1	33.8983				59.3318	33.0748	94.745	34.8799
	32	0	0		1	36.3636		1	44.4444		0	0		6	153.846			2	72.7273		4	228.571		1	47.619		1	90.9091		1	33.8983				46.9308	28.2434	94.745	34.8799
	33	0	0		0	0		1	44.4444		0	0		6	153.846			3	109.091		5	285.714		1	47.619		2	181.818		2	67.7966				39.6581	29.8162	138.408	43.4003
	34	1	40.8163		1	36.3636		1	44.4444		0	0		4	102.564			3	109.091		5	285.714		2	95.2381		1	90.9091		2	67.7966				44.8377	16.4786	129.75	39.5535
	35	0	0		1	36.3636		2	88.8889		0	0		5	128.205			3	109.091		6	342.857		2	95.2381		1	90.9091		2	67.7966				50.6915	25.31	141.178	50.8558
	36	0	0		0	0		1	44.4444		0	0		5	128.205			3	109.091		7	400		2	95.2381		2	181.818		1	33.8983				34.5299	24.9502	164.009	63.515
	37	0	0		2	72.7273		2	88.8889		0	0		5	128.205			4	145.455		7	400		2	95.2381		2	181.818		1	33.8983				57.9643	25.3256	171.282	62.3486
	38	1	40.8163		0	0		1	44.4444		0	0		5	128.205			4	145.455		7	400		2	95.2381		2	181.818		1	33.8983				42.6932	23.414	171.282	62.3486
	39	1	40.8163		2	72.7273		1	44.4444		0	0		5	128.205			4	145.455		7	400		2	95.2381		2	181.818		1	33.8983				57.2386	21.1964	171.282	62.3486
	40	1	40.8163		1	36.3636		2	88.8889		0	0		4	102.564			5	181.818		7	400		2	95.2381		2	181.818		1	33.8983				53.7266	18.6764	178.555	62.0187
	41	1	40.8163		1	36.3636		1	44.4444		0	0		5	128.205			5	181.818		7	400		2	95.2381		3	272.727		1	33.8983				49.9659	21.1154	196.736	64.8581
	42	0	0		0	0		2	88.8889		0	0		6	153.846			5	181.818		7	400		3	142.857		3	272.727		1	33.8983				48.547	31.453	206.26	61.7572
	43	0	0		2	72.7273		1	44.4444		0	0		4	102.564			5	181.818		8	457.143		4	190.476		4	363.636		1	33.8983				43.9472	20.1584	245.394	74.3664
	44	0	0		4	145.455		1	44.4444		0	0		5	128.205			6	218.182		7	400		6	285.714		6	545.455		1	33.8983				63.6208	31.0893	296.65	85.9943
	45	1	40.8163		1	36.3636		2	88.8889		0	0		3	76.9231			7	254.545		7	400		7	333.333		6	545.455		1	33.8983				48.5984	15.8077	313.446	84.6556
	46	2	81.6327		5	181.818		3	133.333		0	0		4	102.564			6	218.182		7	400		8	380.952		7	636.364		1	33.8983				99.8697	30.1241	333.879	100.364
	47	0	0		1	36.3636		1	44.4444		0	0		4	102.564			7	254.545		7	400		9	428.571		8	727.273		1	33.8983				36.6744	18.8308	368.858	113.636
	48	1	40.8163		6	218.182		1	44.4444		0	0		4	102.564			8	290.909		7	400		9	428.571		8	727.273		1	33.8983				81.2013	37.9445	376.13	112.028
	49	1	40.8163		6	218.182		2	88.8889		0	0		4	102.564			8	290.909		7	400		6	285.714		8	727.273		2	67.7966				90.0902	36.8162	354.339	107.704
	50	1	40.8163		6	218.182		2	88.8889		0	0		5	128.205			9	327.273		7	400		5	238.095		9	818.182		3	101.695				95.2184	37.5994	377.049	120.982
	51	2	81.6327		7	254.545		5	222.222		0	0		4	102.564			9	327.273		7	400		5	238.095		9	818.182		4	135.593				132.193	46.8959	383.829	117.257
	52	3	122.449		7	254.545		2	88.8889		0	0		4	102.564			9	327.273		7	400		6	285.714		9	818.182		4	135.593				113.689	40.9764	393.352	114.655
	53	3	122.449		8	290.909		4	177.778		0	0		4	102.564			9	327.273		8	457.143		6	285.714		9	818.182		5	169.492				138.74	47.6981	411.561	111.57
	54	4	163.265		9	327.273		5	222.222		6	480		4	102.564			9	327.273		6	342.857		7	333.333		9	818.182		5	169.492				259.065	66.5177	398.227	109.771
	55	5	204.082		10	363.636		4	177.778		7	560		4	102.564			9	327.273		6	342.857		6	285.714		8	727.273		4	135.593				281.612	81.5716	363.742	97.9951
	56	6	244.898		11	400		4	177.778		8	640		4	102.564			9	327.273		6	342.857		7	333.333		8	727.273		5	169.492				313.048	95.3164	380.045	92.5337
	57	7	285.714		12	436.364		6	266.667		9	720		5	128.205			10	363.636		6	342.857		7	333.333		8	727.273		5	169.492				367.39	100.776	387.318	91.7795
	58	8	326.531		13	472.727		5	222.222		10	800		8	205.128			10	363.636		6	342.857		7	333.333		8	727.273		5	169.492				405.322	109.573	387.318	91.7795
	59	10	408.163		14	509.091		4	177.778		9	720		13	333.333			10	363.636		6	342.857		7	333.333		8	727.273		6	203.39				429.673	90.4965	394.098	87.9264
	60	10	408.163		13	472.727		7	311.111		7	560		11	282.051			11	400		6	342.857		7	333.333		8	727.273		6	203.39				406.811	51.2529	401.371	87.5966
	61	10	408.163		14	509.091		7	311.111		5	400		10	256.41			12	436.364		6	342.857		7	333.333		7	636.364		6	203.39				376.955	43.4922	390.462	71.7985
	62	9	367.347		14	509.091		9	400		6	480		10	256.41			12	436.364		6	342.857		7	333.333		8	727.273		6	203.39				402.57	44.6945	408.643	87.8697
	63	9	367.347		14	509.091		10	444.444		7	560		9	230.769			12	436.364		5	285.714		7	333.333		8	727.273		6	203.39				422.33	57.7443	397.215	90.7062
	64	8	326.531		14	509.091		12	533.333		8	640		9	230.769			12	436.364		5	285.714		7	333.333		8	727.273		7	237.288				447.945	74.1019	403.994	87.2728
	65	8	326.531		14	509.091		13	577.778		7	560		10	256.41			12	436.364		5	285.714		7	333.333		7	636.364		7	237.288				445.962	65.0227	385.813	70.7688
	66	9	367.347		13	472.727		13	577.778		8	640		10	256.41			11	400		5	285.714		7	333.333		7	636.364		7	237.288				462.852	69.4357	378.54	69.8376
	67	9	367.347		14	509.091		13	577.778		7	560		9	230.769			11	400		4	228.571		6	285.714		8	727.273		8	271.186				448.997	65.8815	382.549	90.7267
	68	10	408.163		13	472.727		13	577.778		8	640		9	230.769			11	400		4	228.571		7	333.333		8	727.273		9	305.085				465.888	71.237	398.852	86.5858
	69	10	408.163		13	472.727		13	577.778		8	640		8	205.128			11	400		4	228.571		7	333.333		7	636.364		8	271.186				460.759	75.524	373.891	71.7233
	70	10	408.163		12	436.364		13	577.778		9	720		9	230.769			11	400		4	228.571		6	285.714		8	727.273		8	271.186				474.615	82.5215	382.549	90.7267
	71	10	408.163		12	436.364		14	622.222		9	720		9	230.769			11	400		4	228.571		7	333.333		7	636.364		8	271.186				483.504	85.7165	373.891	71.7233
	72	9	367.347		12	436.364		13	577.778		9	720		8	205.128			11	400		4	228.571		7	333.333		7	636.364		8	271.186				461.323	88.1946	373.891	71.7233
	73	8	326.531		12	436.364		11	488.889		9	720		8	205.128			11	400		4	228.571		7	333.333		7	636.364		7	237.288				435.382	86.2371	367.111	74.42
	74	8	326.531		13	472.727		10	444.444		9	720		12	307.692			11	400		4	228.571		7	333.333		7	636.364		8	271.186				454.279	73.774	373.891	71.7233
	75	8	326.531		12	436.364		10	444.444		9	720		13	333.333			11	400		5	285.714		7	333.333		7	636.364		7	237.288				452.134	71.3967	378.54	69.8376
	76	7	285.714		12	436.364		10	444.444		8	640		13	333.333			11	400		4	228.571		6	285.714		8	727.273		7	237.288				427.971	61.0292	375.769	93.0312
	77	7	285.714		12	436.364		9	400		9	720		13	333.333			12	436.364		4	228.571		6	285.714		7	636.364		6	203.39				435.082	75.8532	358.081	80.47
	78	6	244.898		12	436.364		9	400		8	640		12	307.692			11	400		4	228.571		6	285.714		7	636.364		7	237.288				405.791	67.5766	357.587	76.0913
	79	5	204.082		13	472.727		9	400		9	720		12	307.692			10	363.636		4	228.571		7	333.333		7	636.364		7	237.288				420.9	87.2954	359.839	73.9705
	80	5	204.082		13	472.727		9	400		9	720		13	333.333			10	363.636		3	171.429		7	333.333		7	636.364		8	271.186				426.028	85.7701	355.19	77.5991
	81	4	163.265		12	436.364		9	400		10	800		12	307.692			9	327.273		4	228.571		6	285.714		7	636.364		7	237.288				421.464	105.731	343.042	75.452
	82	5	204.082		12	436.364		8	355.556		8	640		12	307.692			9	327.273		3	171.429		6	285.714		7	636.364		7	237.288				388.739	73.2012	331.613	80.4844
	83	5	204.082		11	400		10	444.444		8	640		11	282.051			9	327.273		3	171.429		6	285.714		7	636.364		7	237.288				394.115	74.7322	331.613	80.4844
	84	5	204.082		12	436.364		9	400		9	720		11	282.051			9	327.273		3	171.429		6	285.714		7	636.364		7	237.288				408.499	88.2205	331.613	80.4844
	85	5	204.082		11	400		9	400		9	720		11	282.051			9	327.273		3	171.429		6	285.714		6	545.455		7	237.288				401.227	87.9455	313.432	63.5441
	86	4	163.265		12	436.364		9	400		9	720		12	307.692			9	327.273		2	114.286		6	285.714		6	545.455		6	203.39				405.464	91.6889	295.223	72.4241
	87	4	163.265		11	400		9	400		8	640		12	307.692			9	327.273		2	114.286		6	285.714		6	545.455		6	203.39				382.192	77.6461	295.223	72.4241
	88	4	163.265		12	436.364		9	400		7	560		12	307.692			8	290.909		2	114.286		6	285.714		6	545.455		6	203.39				373.464	66.3195	287.951	71.9833
	89	3	122.449		12	436.364		10	444.444		9	720		12	307.692			8	290.909		2	114.286		6	285.714		7	636.364		7	237.288				406.19	97.7398	312.912	86.8954
	90	2	81.6327		12	436.364		10	444.444		8	640		12	307.692			8	290.909		2	114.286		6	285.714		6	545.455		6	203.39				382.027	91.9676	287.951	71.9833
	91	2	81.6327		12	436.364		10	444.444		8	640		12	307.692			8	290.909		1	57.1429		6	285.714		6	545.455		7	237.288				382.027	91.9676	283.302	78.1194
	92	4	163.265		11	400		9	400		9	720		12	307.692			9	327.273		3	171.429		6	285.714		6	545.455		6	203.39				398.192	91.364	306.652	65.8934
	93	3	122.449		11	400		10	444.444		9	720		12	307.692			8	290.909		2	114.286		6	285.714		6	545.455		7	237.288				398.917	97.4486	294.73	70.2917
	94	2	81.6327		11	400		9	400		8	640		12	307.692			8	290.909		2	114.286		6	285.714		6	545.455		7	237.288				365.865	89.9034	294.73	70.2917
	95	2	81.6327		12	436.364		9	400		9	720		12	307.692			8	290.909		3	171.429		6	285.714		6	545.455		6	203.39				389.138	103.201	299.379	65.7255
	96	2	81.6327		11	400		9	400		9	720		12	307.692			7	254.545		3	171.429		6	285.714		6	545.455		7	237.288				381.865	102.624	298.886	64.4109
	97	2	81.6327		11	400		10	444.444		9	720		12	307.692			8	290.909		3	171.429		6	285.714		7	636.364		6	203.39				390.754	103.399	317.561	82.9908
	98	2	81.6327		11	400		9	400		8	640		11	282.051			7	254.545		4	228.571		6	285.714		6	545.455		6	203.39				360.737	90.874	303.535	62.0045
	99	3	122.449		10	363.636		9	400		8	640		12	307.692			6	218.182		3	171.429		6	285.714		5	454.545		6	203.39				366.756	83.3522	266.652	50.5402
	100	2	81.6327		10	363.636		9	400		8	640		10	256.41			6	218.182		2	114.286		6	285.714		5	454.545		6	203.39				348.336	91.5293	255.223	56.8248
	101	1	40.8163		11	400		9	400		9	720		10	256.41			6	218.182		1	57.1429		6	285.714		5	454.545		6	203.39				363.445	110.759	243.795	64.537
	102	1	40.8163		10	363.636		8	355.556		9	720		9	230.769			5	181.818		1	57.1429		6	285.714		5	454.545		6	203.39				342.155	111.045	236.522	65.6587
	103	1	40.8163		11	400		9	400		9	720		9	230.769			5	181.818		4	228.571		6	285.714		5	454.545		6	203.39				358.317	112.108	270.808	49.107
	104	1	40.8163		10	363.636		9	400		8	640		8	205.128			5	181.818		4	228.571		6	285.714		5	454.545		6	203.39				329.916	100.337	270.808	49.107
	105	1	40.8163		11	400		8	355.556		8	640		8	205.128			4	145.455		5	285.714		6	285.714		6	545.455		6	203.39				328.3	100.214	293.145	68.4248
	106	2	81.6327		10	363.636		9	400		8	640		8	205.128			4	145.455		4	228.571		6	285.714		5	454.545		5	169.492				338.079	94.6267	256.755	55.1166
	107	2	81.6327		11	400		8	355.556		9	720		8	205.128			4	145.455		3	171.429		7	333.333		5	454.545		6	203.39				352.463	107.798	261.63	58.0442
	108	1	40.8163		12	436.364		8	355.556		9	720		7	179.487			5	181.818		3	171.429		6	285.714		5	454.545		6	203.39				346.445	115.973	259.379	52.7585
	109	1	40.8163		11	400		8	355.556		9	720		7	179.487			4	145.455		3	171.429		6	285.714		5	454.545		6	203.39				339.172	114.785	252.107	55.8426
	110	1	40.8163		10	363.636		8	355.556		8	640		7	179.487			4	145.455		4	228.571		7	333.333		5	454.545		6	203.39				315.899	100.79	273.059	54.6288
	111	1	40.8163		12	436.364		7	311.111		9	720		8	205.128			4	145.455		3	171.429		7	333.333		5	454.545		5	169.492				342.684	114.496	254.851	60.1043
	112	0	0		11	400		8	355.556		8	640		7	179.487			3	109.091		3	171.429		7	333.333		5	454.545		5	169.492				315.009	107.723	247.578	63.7434
	no of induction APs		450			430			490			340			400				240			270			190			220			300
	Control							Intra-4-AP
	Induction APs							Induction APS
	450							240
	430							270
	490							190
	340							228
	400							320
								300
	422							258
	22.9855							19.6638
Shapiro Wilk Normaiity Test							Shapiro Wilk Normaiity Test
p	0.99						p	0.99
W	0.98						W	0.98
NORMALLY DISTRUBUTED							NORMALLY DISTRUBUTED
Control versus Intra 4-AP
Unpaired Two Tailed T-test
equal variance assumed
Z	5.2
W	9
p value	0.00055
