# Supplementary material for: Activity-dependent tuning of intrinsic excitability in mouse and human neurogliaform cells
Source: eLife journal article supplement (doi:10.7554/elife.57571), 2020-06-04
Supplement: supp [file elife-57571-supp-v1.zip › elife_poa_e57571_Figure_6_figure_supplement_1_source_data_1.xlsx]

## Sheet: Figure 6-figure supplement 1C
Cluster name	Cluster number	Gad1	Gad2	Slc32a1	Nkx2-1	Lhx6	Sst	Elfn1	Chodl	Rab3b	Th	Pvalb	Pthlh	Cox6a2	Tac1	Nek7	Lamp5	Hapln1	Id2	Cacna2d1	Ndnf	Prox1	Htr3a	Vip	Calb2	Cck	Cnr1	Sncg	Cxcl14	Slc17a7	Fibcd1	Cacng5	Wfs1	Dcn
GABA.MGE.SST.CHODL	3	3.82601	2.85133	0.330916	0	0.709467	5.44343	0	2.421	3.3825	0	0	0	0	0	0.349524	0	0	0	0	0	0	0	0.00651611	0.983415	0	0	0.189956	0	0	0	1.37164	0	0
GABA.MGE.SST.CHODL	3	3.46897	2.74905	0.594218	0	1.36336	5.36463	0	2.61866	3.04259	0	0	0	0	0	0.00622377	0	0.0367745	0.00622377	0	0.511637	0	0	0.012409	0.987926	0	0.0722445	0	0	0	0	0.761974	0	0
GABA.MGE.SST.CHODL	3	3.58246	2.38524	0.172137	0	1.02911	5.49358	0	2.54843	3.57394	0	0	0	0	0	0.00468503	0	0	0.00468503	0.00468503	0	0	0	0.00468503	3.3568	0	0.378581	0	0	0	0	0.199435	0	0
GABA.MGE.SST.CHODL	3	4.02271	2.51522	0.572272	0	1.54863	5.19894	0.186722	2.98587	3.44736	0	0	0	0	0	0	0.004876	0	0	0	0	0	0	0	1.83252	0	0.0932701	0	0	0.0707554	0	0.644095	0.308738	0
GABA.MGE.SST.CHODL	3	3.72965	1.45628	0.508129	0	0.887443	5.39878	0	2.386	3.24198	0	0.00694612	0.00694612	0	0	0.722456	0	0	0	0	0	0	0	0	2.37634	0	0	0	0	0	0.178287	0.429646	0	0
GABA.MGE.SST.CHODL	3	3.44384	2.70861	0.653307	0	0.756475	5.4123	0.0762429	2.37441	3.30777	0	0	0	0	0	0.236244	0	0	0.291554	0	0	0	0	0	2.18372	0	0.183706	0	0	0.00717643	0.0143017	0.177695	0	0
GABA.MGE.SST.CHODL	3	2.96975	2.22823	0.693918	0	0.466812	5.29559	0.079582	1.77789	3.43232	0	0	0	0	0	0	0	0	0	0	0	0	0	0.0223398	0.17249	0	0	0	0.00750218	0	0	0.0369604	0	0
GABA.MGE.SST.CHODL	3	3.10175	2.67282	0.735307	0	1.08782	5.66067	0.547162	0	3.74293	0	0	0	0	0	0.0738706	0	0	0	0	0	0	0	0.0252347	0	0	0.404357	0	0	0	0.412849	0	0	0
GABA.MGE.SST.CHODL	3	3.40233	2.85959	0.448633	0	0.328758	5.18673	0.0517177	1.90431	3.15421	0	0	0	0	0	0	0	0	0	0	0	0	0	0	0.289802	0	0	0	0	0	0	0.732012	0	0
GABA.MGE.SST.CHODL	3	2.85074	2.4523	0.584775	0	0.782999	5.18723	0.303701	2.23588	3.55197	0	0	0	0	0	0.102559	0	0	0	0	0	0	0.0153111	0.00768484	1.99561	0	0.0452474	0.059886	0	0	0	0.169866	0	0
GABA.MGE.SST.CHODL	3	3.425	2.60648	0.84349	0	0.469944	5.07725	0	1.46121	3.07662	0	0	0	0	0	0	0	0	0.171415	0	0	0	0	0.00776077	0	0	0	0	0	0	0	0.00776077	0	0
GABA.MGE.SST.CHODL	3	3.40376	2.85424	0.746136	0	0.220977	5.20665	0	1.81699	2.9858	0	0	0	0	0	0	0	0	0	0	0	0	0	0	1.82087	0	0.0986719	0	0	0	0	0.201603	0	0
GABA.MGE.SST.CHODL	3	3.715	2.42202	0.482433	0	0.82477	5.89938	0.320569	2.84714	3.77202	0	0	0	0	0	0.0405027	0	0.00588751	0	0.0848677	0	0	0	0.0117406	2.97193	0	0	0	0	0	0	0.602501	0.0684606	0
GABA.MGE.SST.CHODL	3	3.31278	2.20561	0.214247	0	0.932592	5.70105	0	1.78068	3.41445	0	0	0	0	0	0	0	0	0	0	0.937282	0	0	0	0	0.0236118	0.0236118	0	0	0	0.102121	0.133969	0	0
GABA.MGE.SST.CHODL	3	3.36631	2.50189	0.387675	0	1.1129	5.68235	0.00530669	2.39866	3.17458	0	0	0	0	0	0	0	0	0	0	0	0	0	0.00530669	2.12901	0.00530669	0	0	0	0	0.110698	0.00530669	0	0
GABA.MGE.SST.CHODL	3	2.97088	1.98413	0.183221	0	1.43219	5.95737	0.246508	2.30499	3.56072	0	0	0	0	0	0.40563	0.00489239	0	0.00489239	0.62228	0.0618069	0	0.00489239	0.00976096	0	0	0.00489239	0	0.00489239	0	0	0	0	0
GABA.MGE.SST.CHODL	3	3.1804	1.33055	0.0317886	0	0.768899	5.73123	0	2.15875	3.53892	0	0	0	0	0	0	0	0.00536877	0	0	0.369358	0	0	0.0524331	0.238355	0.0160206	0.190575	0	0	0	0	0.238355	0	0
GABA.MGE.SST.CHODL	3	3.60736	2.44301	0.158468	0	1.39412	5.55121	0.164089	1.93119	3.55439	0	0	0	0	0	0	0	0	0	0	0	0	0	0.0324885	3.41171	0	0.00658269	0	0	0	0	0.458176	0	0
GABA.MGE.SST.CHODL	3	3.6364	1.99839	0.590087	0	0.734322	5.41286	0.0399091	2.20351	3.37473	0	0	0	0	0	0	0.00507661	0	0	0	0	0	0	0.00507661	2.48435	0	0	0.684247	0	0	0	0.189521	0	0
GABA.MGE.SST.CHODL	3	3.19221	1.40252	0.183714	0	1.69636	5.31723	0.197997	2.64106	3.649	0	0	0	0	0	0.279657	0	0	0.00574552	0	0	0	0	0.00574552	0	0	0	0	0	0	0	0.322298	0	0
GABA.MGE.SST.CHODL	3	1.75482	1.4646	0.24146	0	1.90915	6.09197	0	2.21383	2.8873	0	0	0	0	0	0.0926745	0	0	0.00605069	0	0	0	0	0.05892	0	0.012065	0	0	0	0.00605069	0	0.341194	0	0
GABA.MGE.SST.CHODL	3	3.49476	2.3385	0.481972	0	1.06643	5.40838	0.235388	2.07952	3.19492	0	0	0	0	0	0	0	0	0	0	0	0	0	0.0404549	0.0404549	0.0117265	0.00588044	0	0	0.00588044	0.00588044	0.249273	0	0
GABA.MGE.SST.CHODL	3	3.37704	2.28245	0.555717	0	1.41255	5.66034	0.0315763	1.79429	3.36288	0	0	0	0	0	0.148765	0.0263824	0.0159128	0.0159128	0.0211613	0.0367435	0.00533245	0	0	0	0.0106366	0.00533245	0	0	0	0.442154	0	0	0
GABA.MGE.SST.CHODL	3	3.95828	2.23537	0.417929	0	1.27245	5.66864	0.34092	2.57142	3.41157	0	0	0	0	0	0	0	0	0.00488252	0	0.00488252	0	0	0	3.29871	0	0.433913	0	0	0	0	0.344394	0	0
GABA.MGE.SST.CHODL	3	3.75542	1.70865	0.583665	0	1.13862	5.6455	0.201647	2.14884	3.45694	0	0	0	0	0	0.0210545	0	0	0	0	0	0	0	0.0416749	1.75109	0.00530534	0.0568659	0	0	0.00530534	0	0.430004	0	0
GABA.MGE.SST.CHODL	3	3.32509	2.11065	0.325865	0	0.273654	5.73158	0.102604	2.91139	3.54601	0	0	0	0	0	0	0	0	0.00468691	0	0	0	0	0.0139953	0.837558	0	0.00468691	0	0	0	0.115243	0.349328	0	0
GABA.MGE.SST.CHODL	3	3.76169	2.3251	0.515268	0	0.781253	5.08522	0.0225178	2.08064	3.40194	0	0	0.0045443	0	0	0	0	0	0.0045443	0	0.0045443	0	0.245166	0.140026	0.297251	0.00906804	0.0045443	0	0	0	0.0703413	0.0045443	0	0
GABA.MGE.SST.CHODL	3	4.0416	2.5343	0.334633	0	1.42194	4.55307	0.414698	2.50703	3.26467	0	0	0	0	0	0	0.00682882	0	0	0	0	0	0	0.0402905	0.082181	0.0102258	0.107114	1.52176	0	0	0	0.421465	0.00682882	0
GABA.MGE.SST.CHODL	3	4.08478	2.22034	0.532254	0	1.06486	5.05394	0.138432	2.0186	3.36684	0	0	0	0	0	0.00984945	0	0	0.00984945	0	0.043578	0	0	0.0988767	2.30578	0	0.0244441	0	0.0196028	0	0.0623528	0.319274	0	0
GABA.MGE.SST.CHODL	3	3.65378	2.60645	0.266259	0	0.432151	4.98141	0	2.11112	3.5358	0	0	0	0	0	0	0.0106474	0	0.00533788	0	0	0	0.220098	0.0968462	2.74388	0.0159289	0.00533788	0	0.00533788	0	0	0.24554	0.0870824	0
GABA.MGE.SST.CHODL	3	3.91176	2.47717	0.511451	0	0.877624	4.88838	0	2.753	3.21739	0	0	0	0	0	0.302905	0	0	0.00497053	0.00497053	0.331926	0	0	0.0580753	1.99446	0	0.00991647	0	0.00991647	0	0.214449	0.763637	0	0
GABA.MGE.SST.CHODL	3	3.60726	2.26288	0.498829	0	0.548542	5.49277	0.0243869	2.51892	3.17736	0.282065	0	0	0	0	0	0	0	0	0	0	0	0	0.00982625	1.50968	0.0049252	0.176099	0	0	0	0	0.52837	0	0
GABA.MGE.SST.CHODL	3	2.97357	1.9393	0.302026	0	1.39059	5.87504	0.0149982	2.33931	2.89457	0	0	0	0	0	0	0	0	0	0.0586888	0	0	0	0.0539275	0	0.00502445	0.0199481	0	0	0	0.236625	0	0	0
GABA.MGE.SST.CHODL	3	3.33453	1.88008	0.189915	0	1.23548	5.64927	0.29329	2.56068	2.79346	0	0	0	0	0	0.371065	0	0	0	0	0	0	0	0.00771632	0	0	0	0	0	0	0	0	0	0
GABA.MGE.SST.CHODL	3	3.40093	2.22391	0.539406	0	0.825391	5.21426	0	2.57465	3.10438	0	0	0	0	0	0	0	0	0	0	0	0	0	0	0.0611772	0	0	0	0	0	0.167421	0	0	0
GABA.MGE.SST.CHODL	3	3.49641	1.87312	0.343742	0	1.08767	6.44085	0.423579	1.31619	4.07383	0	0	0	0.125705	0	0	0	0	0.450615	0.250478	0	0	0	0	2.69891	0.00833688	0	0	0	0	0	0	0	0
GABA.MGE.SST.CHODL	3	3.03386	1.43144	0.324459	0	2.07203	5.46978	0	2.34055	2.86788	0	0	0	0	0	0.0476289	0	0	0.0206908	0.267448	0.324459	0	0.0069446	0.0069446	0	0.0138413	0.0274937	0	0	0	0	0	0	0
GABA.MGE.SST.CHODL	3	3.66805	2.16542	0.219082	0	0.181791	5.61853	0.055398	2.14828	3.20085	0	0.0113278	0	0	0	0.00567996	0.00567996	0	0.00567996	0	0	0	0	0.0336057	2.86781	0	0.0280826	0	0	0	0.26382	0.496926	0	0
GABA.MGE.SST.CHODL	3	3.70369	2.56543	0.320862	0	0.958523	5.7103	0.0207997	2.31363	3.39994	0	0	0	0	0	0	0	0	0	0	0	0	0	0.104668	0.109389	0.00524063	0.173245	0	0	0	0.0660751	0.216483	0	0
GABA.MGE.SST.CHODL	3	1.66625	1.54612	0.480267	0	0.784951	5.70161	0	2.69198	3.15587	0	0	0	0	0	0	0	0	0	0	0	0	0	0.0728873	0	0	0	1.13315	0	0	0	0.0115651	0.00579925	0
GABA.MGE.SST.CHODL	3	3.16476	1.68351	0.315386	0	0.95059	5.50467	0.183702	2.206	3.66196	0	0.006484	0.006484	0	0	0.0129262	0.006484	0	0.0129262	0	0	0	0.006484	0.0931041	2.16803	0	0	0	0	0	0	0.178273	0	0
GABA.MGE.SST.CHODL	3	3.59828	2.13979	0.291131	0	0.840443	5.23672	0	2.69953	3.01722	0	0	0	0	0	0.168298	0	0	0	0	0	0	0	0.0113905	1.64616	0	0.316493	0	0	0	0.133827	0.128804	0	0
GABA.MGE.SST.CHODL	3	3.73815	1.87844	0.468383	0	1.46861	5.33862	0.229916	3.07212	3.22093	0	0	0	0	0	0	0	0	0	0	0	0	0	0.00572788	1.72605	0	0.0504068	0	0	0	0.220745	0.642831	0	0
GABA.MGE.SST.CHODL	3	3.47916	2.65805	0.117044	0	0.822934	5.68323	0.0849774	3.03391	2.99829	0	0	0	0	0	0.482949	0	0	0	0	0	0	0	0.615968	0.0685498	0	0.017583	0	0	0	0	0.163296	0	0
GABA.MGE.SST.CHODL	3	3.44092	2.19364	0.509493	0	1.0871	5.39124	0.0433434	2.50201	2.97717	0.181766	0	0	0	0	0	0	0	0	0	0	0	0	0.0110132	0	0.0164747	0.00552179	0	0	0	0	0.726897	0	0
GABA.MGE.SST.CHODL	3	3.53305	2.40101	0.351857	0	0.331331	5.63322	0	2.66013	3.03758	0	0	0	0	0	0.109335	0	0	0.00576016	0	0	0	0	0.0228442	0.00576016	0.00576016	0.109335	0	0	0	0	0.448604	0.0616073	0
GABA.MGE.SST.CHODL	3	4.10633	2.6299	0.598197	0	0.755205	5.14135	0.303816	2.76159	3.18147	0	0	0	0	0	0	0	0	0.0057098	0	0	0	0	0.0282285	2.93369	0.0113872	0.291058	0	0	0	0.0556819	0.0057098	0	0
GABA.MGE.SST.CHODL	3	3.4254	2.64389	0.292241	0	0.620721	5.43134	0.12628	2.16012	3.29241	0.335005	0	0	0	0	0	0	0	0	0.196003	0	0	0	0.0288409	0.0841412	0	0	0	0	0	0.0568732	0.696428	0	0
GABA.MGE.SST.CHODL	3	3.31275	2.60285	0.412304	0	0.788937	5.62055	0	2.37389	3.00158	0.212267	0	0	0	0	0.539795	0	0	0	0	0	0	0	0.0123694	0.675278	0	0	0	0	0	0.0366583	0.308175	0	0
GABA.MGE.SST.CHODL	3	3.86962	2.36589	0.356209	0	1.37002	5.39352	0.0821154	2.76468	2.97536	0	0	0.00852169	0	0	0	0.0253503	0.00852169	0.00852169	0	0	0	0	0.0253503	0	0	0	0	0	0	0	0.645615	0	0
GABA.MGE.SST.CHODL	3	2.69283	1.65388	0.242436	0	1.1474	5.50967	0	3.02267	3.09569	0	0	0	0	0	0	0	0	0.155266	0	0	0	0.150461	0.0111357	0	0	0.164808	1.15977	0	0	0.0702595	0.0166574	0.0276101	0
GABA.MGE.SST.CHODL	3	1.02585	1.10962	0.222897	0	2.26202	5.80432	0	2.72771	3.24725	0	0	0	0	0	0	0	0	0	0.0577503	0	0	0	0.00592744	0	0.00592744	0.704358	0	0	0	0	0	0	0
GABA.MGE.SST.CHODL	3	3.13512	2.37729	0.244724	0	0.361658	5.82415	0.0980206	2.38681	3.08532	0	0	0	0	0	0.133302	0	0	0.0464367	0	0	0	0	0	0	0.0157197	0.281262	0.719604	0	0	0	0	0	0
GABA.MGE.SST.CHODL	3	3.72918	2.3906	0.41188	0	1.35595	5.29566	0.0313565	2.39972	3.47839	0	0	0	0	0	0.00454015	0	0	0	0	0	0	0	0.0180382	2.93539	0	0.0180382	0	0	0	0	0.0313565	0	0
GABA.MGE.SST.CHODL	3	3.81584	2.2805	0.429918	0	1.02922	5.29617	0.145905	2.04371	3.12429	0	0	0	0	0	0.0590303	0	0	0	0	0	0	0	0.0100836	2.50465	0	0.0590303	0	0	0	0.197122	0.0100836	0.128232	0
GABA.MGE.SST.CHODL	3	3.66251	2.34848	0.374091	0	0.500121	5.75744	0.202094	2.40655	3.85195	0	0	0	0	0	0.1687	0	0	0	0	0	0	0	0.0114199	3.09369	0	0	0	0	0	0.149105	0.350103	0	0
GABA.MGE.SST.CHODL	3	3.60333	1.85494	0.304243	0	0.668899	5.84089	0.256585	2.44299	3.31348	0	0	0	0	0	0	0	0	0	0	0.645114	0	0	0.00571908	0	0	0	0	0	0.00571908	0.300003	0.499628	0	0
GABA.MGE.SST.CHODL	3	3.88028	2.36795	0.34458	0	1.03972	5.28692	0.167921	2.84147	3.23492	0	0	0.00506611	0	0	0	0	0.307931	0	0.00506611	0	0	0	0	0	0	0.0101067	0	0	0	0	0.189163	0.101345	0
GABA.MGE.SST.CHODL	3	3.76127	2.00453	0.315562	0	1.14518	5.55232	0	2.32854	3.6344	0	0	0	0	0	0.00637668	0	0	0	0	0	0	0	0	0	0	0.186235	0	0	0	0	0.287167	0	0
GABA.MGE.SST.CHODL	3	3.67639	2.3542	0.434168	0	1.09167	5.55405	0.00609017	2.33131	3.48208	0	0	0	0	0	0.0650349	0	0	0	0	0	0	0	0.0181603	1.65155	0.0121435	0.30329	0	0	0	0	0.00609017	0	0
GABA.MGE.SST.CHODL	3	3.68127	2.25888	0.569493	0	1.45431	5.89181	0	2.65727	3.37316	0	0	0	0	0	0.0776792	0	0	0.0492519	0	0	0	0	0.0298413	3.06202	0.0100464	0.268467	0	0	0	0.0249292	0.0298413	0	0
GABA.MGE.SST.CHODL	3	3.51221	2.55487	0.422791	0	0.555729	5.18846	0.173845	1.83105	3.2553	0	0	0	0	0	0.293989	0	0	0	0	0	0	0	0	0.719025	0	0	0	0	0	0	0.689519	0	0
GABA.MGE.SST.CHODL	3	3.30674	1.50316	0.268222	0	0.737506	5.38043	0	2.45337	3.46971	0	0	0	0	0	0.0477823	0	0	0	0	0.213271	0	0	0	0	0.00696743	0.00696743	0.136999	0.0138866	0	0.262861	0.734156	0	0
GABA.MGE.SST.CHODL	3	3.21333	2.2649	0.832663	0	1.07107	5.67906	0.435358	1.98128	3.28789	0	0	0	0	0	0.0242219	0	0	0.515356	0	0	0	0	0.00611069	0.582602	0.0182212	0.335337	0.941177	0	0	0	0	0.481852	0
GABA.MGE.SST.CHODL	3	3.84268	3.06623	0.521603	0	0.70793	5.59286	0.0727685	2.8034	3.59622	0	0	0	0	0	0.479109	0	0	0	0	0.00537706	0	0	0.00537706	1.86338	0	0	0	0	0	0	0	0	0
GABA.MGE.SST.CHODL	3	3.90448	2.4338	0.366477	0	0.944444	5.67685	0.244241	2.0348	3.2989	0	0	0	0	0	0	0	0	0	0	0	0	0	0	3.0907	0	0	0	0.0326591	0	0	0.134408	0	0
GABA.MGE.SST.CHODL	3	3.72862	2.46234	0.435482	0	1.21335	5.40862	0.183196	2.02135	3.26934	0	0	0	0	0	0.281797	0.00952828	0	0	0	0	0	0	0	2.75095	0	0.245015	0	0	0	0.183196	0.447793	0	0
GABA.MGE.SST.CHODL	3	3.95872	2.31674	0.438148	0	1.24354	5.52442	0	1.87155	2.87065	0	0	0	0.0127058	0	0	0	0	0	0	0	0	0	0	0.783525	0.120329	0.0619736	0	0	0	0.0619736	1.13457	0.324693	0
GABA.MGE.SST.CHODL	3	3.64344	2.23728	0.276061	0	0.476496	5.70587	0	2.65595	3.39252	0	0	0	0	0.0126369	0	0	0	0	0	0.332343	0	0	0	0	0	0	0	0	0	0.0968879	1.01801	0.152998	0
GABA.MGE.SST.CHODL	3	4.13505	2.67705	0.29159	0	1.46275	5.33593	0.274585	2.46041	3.15181	0	0	0	0	0	0.212679	0.0112219	0	0	0.127004	0	0	0	0.0112219	3.1733	0	0.096733	0	0	0.0112219	0.257285	0.643332	0	0
GABA.MGE.SST.CHODL	3	4.43099	2.8539	0.266062	0	1.29941	5.57117	0.258735	2.52551	3.40296	0	0	0	0	0	0.258735	0	0	0	0	0	0	0	0	2.55406	0	0	0	0	0	0	0.654393	0.221272	0
GABA.MGE.SST.CHODL	3	3.98137	2.57087	0.850965	0	1.09092	5.42302	0.169223	2.20744	3.19149	0	0	0	0	0	0	0.0101915	0	0.194839	0	0	0	0	0.0101915	2.61904	0	0.0202801	0	0	0	0	0.328768	0	0
GABA.MGE.SST.CHODL	3	3.20435	2.43483	0.544663	0	0.63175	5.67865	0.254341	2.21982	3.46989	0	0	0	0	0	0.516266	0	0	0	0	0.0119949	0	0	0	2.85643	0.0119949	0.369135	0	0	0	0	0	0.0699017	0
GABA.MGE.SST.CHODL	3	3.36334	2.10516	0.48754	0	0.924005	5.79862	0.158162	2.15801	3.37004	0	0	0	0	0	0	0	0	0	0	0	0	0	0	0	0	0	0	0	0	0	0	0	0
GABA.MGE.SST.CHODL	3	3.88846	2.08721	0.261142	0	0.864027	5.76942	0.0579693	1.85026	3.26218	0	0	0	0	0	0	0	0	0	0	0	0	0	0.0294046	2.11998	0	0.0673123	0	0	0	0.164707	0	0	0
GABA.MGE.SST.CHODL	3	3.55156	2.36465	0.564981	0	0.423548	6.21186	0.450796	1.29402	3.92696	0	0	0.0104922	0	0	0.137729	0	0	0	0.0104922	0	0	0	0	2.79337	0	0.0104922	0	0	0	0	0	0	0
GABA.MGE.SST.CHODL	3	3.49813	2.37101	0.552353	0	1.19828	5.68358	0.17779	2.51007	3.1992	0	0	0	0	0	0	0	0	0	0	0	0	0	0	0.16918	0	0	0	0	0	0.0401463	0.371973	0	0
GABA.MGE.SST.CHODL	3	3.77583	2.03979	0.419511	0	0.625241	5.72572	0.0833016	2.44834	3.45704	0	0	0	0	0	0	0	0	0	0	0	0	0	0	2.42982	0	0.184565	0	0	0	0.168384	0.319497	0	0
GABA.MGE.SST.CHODL	3	3.78413	2.22108	0.288734	0	0.581238	5.72925	0.288734	2.24194	2.96303	0	0	0	0	0	0	0	0	0	0	0	0	0	0	1.82181	0	0	0	0	0	0	0.581238	0	0
GABA.MGE.SST.CHODL	3	3.68004	2.1903	0.372446	0	0.945342	5.24357	0.0990681	1.59854	3.61243	0	0	0	0	0	0	0	0	0	0	0	0	0	0	3.29886	0	0.492511	0	0	0	0	0.0115048	0.426756	0
GABA.MGE.SST.CHODL	3	3.40718	2.06217	0.352697	0	0.166567	5.20819	0.0238783	2.38949	3.54077	0	0	0	0	0	0	0	0	0	0	0	0	0	0	3.24592	0	0.0238783	0	0	0	0	0	0	0
GABA.MGE.SST.CHODL	3	3.70355	2.02577	0.352233	0	1.42715	5.03348	0.0718674	2.08461	3.16816	0	0	0	0	0	0.0123423	0	0	0	0	0	0	0	0	2.12694	0	0.316681	0	0	0	0	0.807315	0	0
GABA.MGE.SST.CHODL	3	3.63338	2.21832	0.343301	0	1.14752	5.39102	0.0113133	2.32394	2.91524	0	0	0	0	0	0.0225001	0	0	0	0	0.527111	0	0	0	0	0.0113133	0.147804	0	0	0	0	0	0	0
GABA.MGE.SST.CHODL	3	3.6854	1.75465	0.330812	0	1.13558	5.09068	0.169875	1.44847	3.1033	0	0	0	0	0	0.0215493	0.0108327	0	0	0	0	0	0	0	1.67426	0	0.0426441	0	0	0	0	0.376686	0	0
GABA.MGE.SST.CHODL	3	3.83368	2.09845	0.451254	0	0.756383	4.97294	0.190706	2.0923	3.30038	0	0	0	0	0	0	0	0	0	0	0	0	0	0	1.19729	0.0099552	0	0	0	0	0	0.254753	0.0953549	0
GABA.MGE.SST.CHODL	3	3.97584	1.5296	0.427104	0	0.532308	5.26201	0.127546	2.43818	3.04494	0	0	0	0	0	0	0	0	0	0	0	0	0	0	0.157043	0	0	0	0	0	0	0.621419	0	0
GABA.MGE.SST.CHODL	3	3.73839	2.62594	0.169631	0	1.20647	4.81953	0.125324	2.37172	3.43828	0	0	0	0	0	0.336863	0	0	0.0102181	0.0102181	0	0	0	0	2.66957	0	0	0	0	0	0.203716	0	0	0
GABA.MGE.SST.CHODL	3	4.02201	2.14505	0.425166	0	1.39724	5.00215	0.465104	2.8435	3.08614	0	0	0	0	0	0.47807	0	0	0	0	0	0	0	0	0.528314	0	0.279193	0	0	0	0	0.717499	0	0
GABA.MGE.SST.CHODL	3	3.48851	1.72045	0.269977	0	0.316212	5.23836	0.0123211	2.08925	3.32737	0	0	0	0	0	0.0365171	0	0	0	0	0	0	0	0	2.59506	0	0.180952	0	0	0	0	0.360403	0	0
GABA.MGE.SST.CHODL	3	3.97424	1.87535	0.278376	0	1.21122	4.65152	0.0218953	2.38322	3.05764	0	0	0	0	0	0	0	0	0.522501	0	0	0	0	0	0.0848438	0.0110076	0.0433214	0	0	0	0	0.0848438	0	0
GABA.MGE.SST.CHODL	3	3.78297	2.10028	0.561582	0	1.53661	5.02353	0.303945	2.23564	3.29879	0	0	0	0	0	0.22978	0	0	0.010706	0	0	0	0	0	2.48851	0	0.111898	0	0	0.010706	0	0.311856	0	0
GABA.MGE.SST.CHODL	3	3.30824	1.82961	0.214648	0	2.23984	5.47069	0	2.47703	3.10873	0	0	0	0	0	0	0	0	0	0	0.792585	0	0	0	0	0	0.289078	0	0	0	0	0.306851	0	0
GABA.MGE.SST.CHODL	3	3.46035	2.24294	0.556766	0	0.781735	5.31338	0.230817	2.01517	3.30694	0.496783	0	0	0	0	0	0.0223253	0	0	0	0	0	0	0	0	0	0.156425	0	0	0	0.0655341	0.28319	0	0
GABA.MGE.SST.CHODL	3	3.46586	1.97747	0.195632	0	0.111984	5.68832	0.3494	1.36088	3.14836	0	0	0	0	0	0.319468	0	0	0	0	0	0	0	0.0069461	0.742558	0.0069461	0.0069461	0	0.0069461	0	0	0.0069461	0	0
GABA.MGE.SST.CHODL	3	4.00291	2.26529	0.287271	0	0.922678	5.51261	0	2.13352	3.49566	0	0	0	0	0.00614377	0.0481247	0	0	0.17999	0	0	0	0	0	2.85676	0.01225	0.0539806	0	0	0	0	0.305597	0	0
GABA.MGE.SST.CHODL	3	2.41559	1.86862	0.469633	0	1.50089	5.75002	0.315811	1.16991	2.93937	0	0	0	0	0	0	0	0	0.00649416	0.0631184	0	0	0	0.00649416	0	0	0	0	0	0.00649416	0	0	0	0
GABA.MGE.SST.CHODL	3	3.8002	2.28257	0.287482	0	1.31593	5.77955	0.0431384	2.93357	3.40921	0	0	0	0	0	0.302073	0	0	0.199189	0	0	0	0	0.00488609	2.91516	0	0.657846	0	0.00488609	0	0	0	0	0
GABA.MGE.SST.CHODL	3	3.83276	2.33349	0.397066	0	1.32193	4.96462	0.228556	2.63658	3.6669	0	0	0	0	0.00434283	0	0	0	0.0550368	0	0	0	0	0	2.52597	0	0.0342257	0	0	0	0.021528	0.649183	0	0
GABA.MGE.SST.CHODL	3	3.50335	2.72396	0.53044	0	0.505927	5.23081	0.289037	1.41208	3.81739	0.00586245	0	0	0	0	0	0	0	0	0	0	0	0	0	3.11569	0	0	0	0	0	0.196839	0	0	0
GABA.MGE.SST.CHODL	3	3.73985	2.25355	0.553783	0	1.32942	4.75877	0.347146	2.66489	3.26727	0.00450097	0	0	0	0	0.450056	0	0	0	0	0	0	0	0.00450097	2.34668	0	0.162062	0	0	0	0.281262	0.321311	0	0
GABA.MGE.SST.CHODL	3	4.05652	2.7507	0.476303	0	1.02683	4.89747	0.058195	2.38206	3.48566	0	0	0	0	0	0.0374229	0	0	0	0	0	0	0.151366	0	3.43131	0	0.0935392	0	0	0	0	0.455795	0	0
GABA.MGE.SST.CHODL	3	3.60136	2.70131	0.249714	0	1.20766	5.73178	0	2.70241	3.51757	0	0	0	0	0	0	0	0	0	0	0.00544014	0	0	0	1.77748	0.00544014	0.0374737	0	0	0	0.0986177	0.223886	0.384668	0
GABA.MGE.SST.CHODL	3	3.76402	2.36651	0.506799	0	0.613489	5.75503	0.156467	2.08269	3.29741	0	0	0	0	0.00582345	0.391309	0	0	0	0	0	0	0	0.0116132	2.59738	0	0.0893351	0	0	0	0.023093	0.260718	0	0
GABA.MGE.SST.CHODL	3	3.4609	2.45523	0.418277	0	1.24287	6.21535	0.177391	1.85763	3.55994	0	0	0	0	0.00523217	0.428582	0	0	0	0	0	0	0	0	2.24669	0.00523217	0.237078	0	0	0.194811	0	0.30507	0	0
GABA.MGE.SST.CHODL	3	3.64747	2.60413	0.147582	0	0.899624	5.84796	0.276159	1.41058	3.74617	0	0	0	0	0	0.00546877	0	0	0.123642	0	0	0	0	0	2.52919	0.0790481	0	0	0	0.00546877	0	0.461695	0	0
GABA.MGE.SST.CHODL	3	2.82696	2.05761	0.542241	0	1.26318	4.81584	0	2.58994	3.17189	0	0	0	0	0.00569689	0	0	0	0	0	0	0	0	0	0	0	0	0	0	0	0	0.0555591	0	0
GABA.MGE.SST.CHODL	3	3.95957	2.45132	0.387086	0	0.422838	5.21054	0.024073	2.38446	3.12727	0	0	0	0	0	0.0193045	0.00486119	0	0	0	0	0	0	0	0	0	0	0	0	0.00486119	0.110604	0.315066	0	0
GABA.MGE.SST.CHODL	3	3.6119	2.72156	0.257274	0	1.20122	5.70655	0.270529	2.9889	3.4219	0	0.00573644	0	0	0	0.234783	0	0	0	0	0	0	0	0	0.0827718	0	0.0933079	0	0	0	0	0.0171115	0.197712	0
GABA.MGE.SST.CHODL	3	4.04912	2.868	0.371647	0	0.701689	5.47758	0.136402	2.7671	3.22944	0	0	0	0	0.0058287	0.228896	0	0	0	0	0	0	0	0	2.46089	0	0	0	0	0	0.0344733	0.166546	0	0
GABA.MGE.SST.CHODL	3	3.66662	2.64845	0.518673	0	0.890288	5.51602	0	2.5868	2.91897	0	0	0	0	0	0.591591	0	0	0.216258	0	0	0	0	0	0.541112	0	0.236522	0	0	0.0556042	0	0.102561	0.130828	0
GABA.MGE.SST.CHODL	3	3.31731	2.29531	0.533538	0	0.492019	5.75868	0.226535	2.09134	2.90249	0	0	0	0	0	0.0396516	0	0	0.164775	0	0	0	0	0	0	0	0	0	0	0	0.335546	0.0451899	0	0
GABA.MGE.SST.CHODL	3	3.2554	2.2153	0.236039	0	0.939737	5.63475	0.0188374	2.35995	3.07536	0	0	0	0	0	0	0	0	0	0	0.00631865	0	0	0	0	0	0	0	0	0	0	0.0733098	0	0
GABA.MGE.SST.CHODL	3	2.85951	1.87209	0.407347	0	1.16994	5.66767	0.131312	2.13748	2.8237	0	0	0	0	0	0	0.00582978	0	0	0	0	0	0	0	0	0.0401123	0.296366	1.76192	0	0	0	0.00582978	0	0
GABA.MGE.SST.CHODL	3	4.0527	2.82116	0.323208	0	1.32945	5.64281	0	2.97654	3.04753	0	0.00633908	0	0	0.00633908	0.460615	0.0852865	0	0	0	0	0	0	0	3.06162	0.00633908	0.114065	0	0	0.0968975	0.246708	0	0.0435522	0
GABA.MGE.SST.CHODL	3	2.33373	2.01385	0.43442	0	1.45887	5.56315	0.168386	2.56071	3.04112	0	0	0	0	0	0.0060945	0	0	0	0.126182	0	0	0	0	0	0	0	0	0	0.0060945	0.093317	0.233382	0	0
GABA.MGE.SST.CHODL	3	2.77881	2.15692	0.302746	0	1.44673	5.90032	0.104116	2.80681	3.55528	0	0	0	0	0	0.0591745	0	0	0	0	0	0	0	0	0	0	0	0	0	0	0.208354	0.00607754	0	0
GABA.MGE.SST.CHODL	3	3.17811	1.61071	0.183348	0	0.639956	4.16066	0.0930961	1.89044	1.99856	0	0	0	0	0	0.109626	0	0	0.808252	0.607273	0	0	0	0	0.0819221	2.80342	0.935654	0	0	2.14869	0.0986366	0.218266	0.275427	0
GABA.MGE.SST.CHODL	3	2.42185	2.33088	0.502663	0	1.31693	5.89003	0.0766355	2.62981	3.47636	0	0	0	0	0	0	0.0079333	0	0	0	0	0	0	0	0	0	0	0	0	0.0079333	0	0	0	0
GABA.MGE.SST.CHODL	3	3.80767	2.6418	0.563446	0	0.932538	5.23452	0.108544	2.50925	2.84561	0	0.124868	0	0	0	0.0271452	0	0.132931	0.217581	0.0793202	0	0	0	0	1.37923	0.0404463	0.156737	0	0.281878	0.48189	0.11265	0.295622	0	0
GABA.MGE.SST.CHODL	3	2.93684	2.20175	0.558316	0	1.13438	5.90716	0	2.45837	3.17297	0	0	0	0	0	0	0.00556454	0	0	0	0	0	0	0	0	0	0	0	0	0	0	0.0220747	0	0
GABA.MGE.SST.CHODL	3	1.26789	1.01034	0.432461	0.19747	1.53168	5.54006	0	1.31994	2.51769	0	0.141389	0	0	0.00944726	0.0643299	0.116357	0	0.37543	0.00944726	0	0	0	0	0	0.0372651	0.934995	0	0	0.38193	0	0.250573	0	0
GABA.MGE.SST.CHODL	3	3.79771	2.34464	0.398827	0	0.608919	5.52396	0.187855	3.13781	2.84845	0	0	0	0	0.00588717	0.28567	0	0	0	0	0	0	0	0	0	0.0233435	0.122129	0.00588717	0	0	0.0739555	0.706748	0	0
GABA.MGE.SST.CHODL	3	3.01938	2.30839	0.397546	0	1.4977	5.76491	0.258751	2.94041	3.21616	0	0	0	0	0.00600867	0	0	0	0.124506	0	0	0	0	0	0.108413	0.0528209	0	0	0	0	0	0.417592	0	0
GABA.MGE.SST.CHODL	3	3.26139	2.08966	0.411938	0	0.713524	5.75911	0	2.64358	3.26781	0	0	0	0.00540812	0.00540812	0.0161374	0	0	0.00540812	0	0	0	0	0	0	0	0	1.02197	0	0	0	0.43326	0.112704	0
GABA.MGE.SST.CHODL	3	3.59827	2.63678	0.415267	0	1.26488	5.42292	0.00518628	2.64605	3.30002	0	0	0	0	0	0	0	0	0	0	0	0	0	0	0.00518628	0	0	0	0	0	0	0.0256665	0	0
GABA.MGE.SST.CHODL	3	3.6369	2.58316	0.359092	0	1.01754	5.76524	0.0584159	2.66635	3.66697	0	0	0	0	0.00545381	0.010878	0	0.00545381	0.312182	0	0	0	0	0	3.09674	0	0.0375664	0	0	0	0	0.202302	0	0
GABA.MGE.SST.CHODL	3	3.62594	2.39325	0.415308	0	0.811072	5.69604	0	2.55941	3.5637	0	0	0	0	0.0198601	0.406441	0	0	0	0	0	0.0132838	0	0	3.09928	0.0584347	0	0.00666394	0	0.0393334	0.0263934	0.160281	0.00666394	0
GABA.MGE.SST.CHODL	3	2.10975	1.79783	0.283016	0	1.54036	6.02346	0	2.10148	3.2021	0	0	0	0	0.0122688	0	0	0	0.00615324	0	0.315053	0	0	0	0	0	0.469193	0	0	0	0	0.49586	0	0
GABA.MGE.SST.CHODL	3	3.4199	2.60031	0.431211	0	0.830249	5.69648	0.0972621	2.38798	3.24307	0	0	0	0	0.00565891	0	0	0	0	0	0	0	0	0	0.0711799	0	0.022446	0	0	0.0168816	0.0551977	0.0389559	0	0
GABA.MGE.SST.CHODL	3	3.08102	2.5457	0.425754	0	1.03663	5.07679	0.0173457	2.47757	3.31469	0	0.00581541	0	0	0	0	0	0	0	0	0	0	0	0	3.22955	0.00581541	0.125878	0	0	0	0	0.0400151	0	0
GABA.MGE.SST.CHODL	3	3.83173	2.55097	0.394859	0	1.43493	5.00891	0.103618	3.00878	3.15942	0	0	0	0	0	0	0	0	0	0	0	0.0188092	0	0	0.112141	0.00473558	0.0732031	0	0	0	0	0.205262	0.359044	0
GABA.MGE.SST.CHODL	3	3.93941	2.63945	0.365579	0	0.792725	5.03947	0.206422	2.84213	3.28343	0	0	0	0	0	0	0	0	0.113657	0.00571543	0	0	0	0	0.818337	0.0226683	0.0557355	0	0.028256	0	0.206422	0.108528	0	0
GABA.MGE.SST.CHODL	3	3.9813	2.44824	0.44311	0	1.06058	4.91192	0.405813	2.22453	3.31956	0	0	0	0	0	0.322187	0	0	0	0	0	0	0	0	2.36668	0.00631574	0	0	0	0.00631574	0	0.362672	0	0
GABA.MGE.SST.CHODL	3	3.39562	2.37625	0.339127	0	1.04057	4.7827	0.164148	2.74182	3.2872	0	0.00468345	0	0	0	0.25546	0	0	0	0.280594	0	0	0	0	0.00934507	0.00468345	0.089739	0	0	0	0	0.407	0	0
GABA.MGE.SST.CHODL	3	3.54005	2.2113	0.386055	0	0.539181	4.81423	0.0155835	2.03897	3.48814	0	0	0	0	0	0.00782209	0	0	0	0	0	0	0	0.00782209	0.159361	0.00782209	0	0	0	0.00782209	0	0.458124	0	0
GABA.MGE.SST.CHODL	3	3.69626	2.66704	0.410665	0	0.923367	4.97959	0.0446356	2.27989	3.43844	0.148216	0	0	0	0	0.0113471	0	0	0	0	0.00568963	0	0	0	2.09163	0.0169727	0	0	0	0.00568963	0.0662278	0.281588	0	0
GABA.MGE.SST.CHODL	3	3.30483	2.4862	0.525277	0	0.826961	4.89692	0.0111719	2.36085	3.31652	0	0	0	0.00560158	0	0.44219	0.0704816	0	0.11652	0.160533	0	0	0	0	0	0.0493192	0	0	0	0.0757029	0.106471	0.174783	0	0
GABA.MGE.SST.CHODL	3	3.70765	2.53836	0.265927	0	0.741842	5.20872	0.0503449	2.76966	3.40917	0	0	0	0	0	0.112219	0	0	0.831172	0	0	0	0	0	2.5215	0.00515009	0	0	0	0	0.0841365	0.00515009	0	0
GABA.MGE.SST.CHODL	3	3.99986	2.58838	0.23552	0	1.20312	4.84413	0.00540511	2.80076	3.25439	0	0	0	0	0	0.244049	0	0	0.136568	0	0	0	0	0	1.18671	0	0.122283	0	0	0.00540511	0	0.507545	0	0
GABA.MGE.SST.CHODL	3	3.65862	2.8487	0.374961	0	0.61861	4.87792	0.0968464	2.2045	3.4553	0.207131	0	0	0	0	0.0722559	0	0	0	0	0	0	0	0	0.842423	0.0106474	0	0	0	0	0	0.5744	0	0
GABA.MGE.SST.CHODL	3	3.50708	2.48178	0.257494	0	1.12035	4.93623	0	2.56226	3.39981	0	0	0	0	0	0.163159	0	0	0	0	0	0	0	0	0.74857	0.00505074	0	0	0	0	0.0250024	0.336485	0	0
GABA.MGE.SST.CHODL	3	3.54732	2.28542	0.33984	0	1.17734	4.77448	0.465165	2.68458	3.26751	0	0	0	0	0	0.0049235	0	0	0	0	0.0049235	0	0	0	0.00982288	0	0	0	0	0	0.0434624	0.617273	0	0
GABA.MGE.SST.CHODL	3	2.91928	2.04037	0.389322	0	1.44938	4.87735	0	3.17738	2.83455	0	0.00593212	0	0	0	0.0293149	0	0	0	0	0	0	0	0	0	0.00593212	0	0	0	0	0.00593212	0.647267	0	0
GABA.MGE.SST.CHODL	3	3.47878	2.2319	0.470399	0	0.318304	5.16969	0.0423366	1.97588	3.56547	0	0.0469319	0	0	0.0330821	0.307764	0	0	0	0	0	0	0	0	0.458318	0	0.245839	0.113442	0	0	0.078521	0.556631	0.0740689	0
GABA.MGE.SST.CHODL	3	3.86593	2.66143	0.458698	0	0.887469	4.78557	0	2.01864	2.90165	0.217712	0	0	0	0	0	0	0	0	0	0	0	0	0	0.499055	0.012946	0.00864926	0	0	0	0	0.156484	0	0
GABA.MGE.SST.CHODL	3	3.32388	2.35293	0.330495	0	0.781294	4.93912	0.118574	2.3578	3.2729	0	0	0	0.00465175	0	0	0	0.217089	0	0	0	0	0	0	0	0	0.00465175	1.58021	0	0	0	0.920553	0	0
GABA.MGE.SST.CHODL	3	3.40932	2.17729	0.284215	0	0.777299	5.25282	0.192038	2.25911	3.31107	0	0	0	0	0	0.333308	0	0	0.00555604	0	0	0	0	0	0.518629	0	0	0	0	0	0	0.474552	0	0
GABA.MGE.SST.CHODL	3	3.64134	2.32662	0.253753	0	0.659862	4.82757	0	2.85171	3.53688	0	0.0056478	0	0	0	0.161759	0	0	0	0	0.0443138	0	0	0	0	0.0056478	0.112381	0	0	0	0	0.325799	0	0
GABA.MGE.SST.CHODL	3	3.70695	2.3835	0.322268	0	0.23369	5.13727	0.0637382	2.12128	3.17063	0	0	0	0	0	0.00728598	0	0	0	0	0	0	0	0	2.6761	0	0	0	0	0	0.0568535	0	0	0
GABA.MGE.SST.CHODL	3	3.67424	2.55464	0.457937	0	0.563795	4.86724	0.219016	2.85282	3.70804	0	0	0.0169383	0	0	0.0499779	0	0	0	0	0	0	0	0.0390855	0.186472	0	0	0	0.0225213	0.00567805	0.143012	0.409978	0.191187	0
GABA.MGE.SST.CHODL	3	4.06494	2.48261	0.567058	0	0.950709	4.3271	0.0960971	2.43536	3.32329	0.0719049	0	0.00437589	0	0.00437589	0.0595857	0	0	0	0	0	0	0	0.0259726	2.10532	0.00437589	0	0	0	0.00437589	0.277738	0.194652	0	0
GABA.MGE.SST.CHODL	3	4.38536	2.16377	0.328248	0	0.470636	4.69773	0.27896	2.50199	3.45133	0	0	0.00605248	0	0	0	0	0	0.00605248	0	0	0	0	0.0589369	1.59859	0	0	1.56742	0	0.00605248	0.162165	0.217394	0	0
GABA.MGE.SST.CHODL	3	3.75188	1.8639	0.351123	0	1.41773	5.42895	0.0762048	2.38948	3.78006	0	0	0	0	0.00493677	0	0.00493677	0	0	0	0	0	0.147011	0.0147378	0.184742	0	0.244625	0	0	0.00493677	0.14273	0.475441	0.00493677	0
GABA.MGE.SST.CHODL	3	3.24667	2.18305	0.469484	0	0.906498	5.04637	0	1.90867	3.56321	0	0	0	0	0	0	0	0	0.00493958	0	0	0	0	0	2.65439	0.00985489	0.176572	0	0.00985489	0	0	0.293918	0.0436017	0
GABA.MGE.SST.CHODL	3	2.93914	2.05579	0.533444	0	0.350319	5.58709	0.418845	0.900133	3.37676	0	0	0	0	0	0	0	0	0	0	0	0	0	0	1.44557	0.00557802	0.682531	0	0	0	0	0	0	0
GABA.MGE.SST.CHODL	3	2.60082	2.08804	0.309773	0	0.617927	5.86049	0.110767	1.62458	3.61632	0	0	0	0	0	0.0401789	0	0	0.00583962	0	0	0	0	0	0.073378	0.191316	0.100226	0	0	0.00583962	0.305467	0	0	0
GABA.MGE.SST.CHODL	3	3.57097	2.39048	0.330677	0	1.01566	4.95855	0.0144108	2.52812	3.48534	0	0	0	0	0	0	0	0	0	0	0	0	0	0	2.08682	0	0.0286169	0	0	0	0	0	0	0
GABA.MGE.SST.CHODL	3	3.57221	2.06535	0.404648	0	0.98428	5.12069	0.0950874	2.27763	3.23652	0	0	0	0.00497535	0.00992607	0	0.00497535	0	0.00497535	0	0	0	0.00497535	0.0343186	1.91923	0	0	0	0	0	0	0.421151	0	0
GABA.MGE.SST.CHODL	3	3.78799	2.00011	0.395161	0	0.829568	4.98269	0	2.30243	3.58933	0	0	0	0	0.011895	0.185169	0	0	0.00596517	0	0	0	0	0.011895	0.190129	0	0	0	0.0352687	0.0294763	0.0637379	0.618191	0	0
GABA.MGE.SST.CHODL	3	4.29088	2.23341	0.344872	0	0.962179	4.61823	0.184752	3.21976	2.90831	0	0	0.00595051	0	0.0177463	0	0	0.00595051	0	0	0	0	0	0	0.332109	0.00595051	0.00595051	0	0	0	0	0.543578	0.179778	0
GABA.MGE.SST.CHODL	3	4.20081	2.81015	0.479376	0	1.01267	5.42285	0.13858	2.88703	3.18628	0	0	0	0	0.0101989	0	0	0	0.00511247	0	0	0	0	0.00511247	1.89745	0	0.63212	0	0.00511247	0	0	0.207542	0	0
GABA.MGE.SST.CHODL	3	3.65235	2.31938	0.338909	0	0.973383	5.11203	0	2.20792	2.91385	0.617502	0	0	0	0	0	0	0	0.00944736	0	0	0	0	0.00473483	0	0.00944736	0.0418275	0	0	0	0.161782	1.05595	0	0
GABA.MGE.SST.CHODL	3	3.49549	2.44351	0.275484	0	0.500736	5.86279	0.0205846	1.57741	3.46441	0	0	0	0	0	0.235209	0	0.00518601	0.425494	0.0205846	0	0.00518601	0	0.103629	2.62249	0.0103453	1.57849	0	0.00518601	0.00518601	0	0.0357496	0.432267	0
GABA.MGE.SST.CHODL	3	3.58628	2.10933	0.550527	0	0.303112	5.2889	0.180537	2.08114	3.23185	0	0	0	0	0	0	0	0	0.0990641	0	0	0	0	0.0257012	2.64214	0	0.131541	0	0	0	0	0.0507583	0	0
GABA.MGE.SST.CHODL	3	3.43031	2.37898	0.217511	0	0.293493	5.78301	0.0139206	2.83262	3.31905	0	0	0	0	0	0	0	0	0	0	0	0	0	0.0411937	0.290003	0	0.00466178	0	0	0	0	0.314183	0	0
GABA.MGE.SST.CHODL	3	3.18062	2.14502	0.306146	0	0.789576	5.47471	0.0202608	1.78477	3.03383	0	0	0	0	0	0	0	0	0.106674	0	0	0	0	0	1.77094	0	0.239956	0	0	0	0	0.566684	0	0
GABA.MGE.SST.CHODL	3	3.01286	1.40146	0.632297	0	0.834203	5.99189	0.0607079	2.45738	3.51105	0	0	0	0	0	0	0	0	0.00567373	0	0.409721	0	0	0	0	0	0	0	0	0	0	0.896461	0	0
GABA.MGE.SST.CHODL	3	3.32462	1.97603	0.382677	0	0.179231	5.81587	0	2.54675	3.31196	0	0	0.00611554	0.00611554	0.00611554	0.281501	0	0	0	0	0	0	0	0	3.18305	0.0121939	0	0	0	0.00611554	0	0.0182355	0	0
GABA.MGE.SST.CHODL	3	3.17115	2.08853	0.236725	0	0.686091	5.58264	0	2.59415	3.25229	0	0	0	0	0	0.0131036	0	0	0.180526	0	0	0	0	0	2.42608	0.00984373	1.01792	0	0	0	0	0.307059	0	0
GABA.MGE.SST.CHODL	3	4.24183	2.43908	0.171991	0	0.811426	5.16341	0.337472	2.31169	3.48961	0	0	0	0	0	0.412687	0	0	0	0	0	0	0	0	3.04214	0.00519945	0	0	0	0	0.025731	0	0	0
GABA.MGE.SST.CHODL	3	3.53489	2.11769	0.223332	0	1.04617	5.43549	0	2.7225	3.06779	0	0	0	0	0	0.199021	0.00499223	0	0.00995966	0	0	0	0	0	0	0.00499223	0	0	0	0	0	0.0247156	0	0
GABA.MGE.SST.CHODL	3	3.15692	2.10192	0.117101	0	0.96804	5.64579	0.286147	2.66842	3.57522	0	0	0	0	0	0	0.0175919	0	0.00589843	0	0.095828	0	0	0.0233878	2.49061	0.0348798	0	0	0.00589843	0.00589843	0	0.522501	0	0
GABA.MGE.SST.CHODL	3	3.3741	2.06335	0.477783	0	1.07892	5.57844	0.328634	2.52993	3.48406	0	0	0	0	0	0.0451895	0	0	0.00767483	0	0	0	0	0.0488647	2.136	0.00384478	0	0	0	0	0	0.0415007	0	0
GABA.MGE.SST.CHODL	3	3.05656	1.53372	0.477821	0	0.557168	5.55993	0.241366	2.08911	3.56303	0.00663616	0	0	0	0	0	0	0	0.728502	0	0	0	0	0	0.220223	0	0	0	0	0	0.159662	0.560975	0	0
GABA.MGE.SST.CHODL	3	3.84948	2.38754	0.633552	0	0.787722	4.88086	0	1.1521	3.43549	0	0	0	0	0.00482055	0	0	0	0.118349	0	0	0	0	0.0143925	1.09233	0	0.0699764	0	0	0	0	0.487466	0	0
GABA.MGE.SST.CHODL	3	3.22761	2.42383	0.733682	0	0.886869	5.86169	0.0179837	2.2984	3.19147	0.012025	0	0.00603058	0	0.00603058	0	0	0	0.140822	0	0	0	0.00603058	0.0644167	1.78507	0	0	0	0	0.00603058	0	0	0	0
GABA.MGE.SST.CHODL	3	3.29527	2.2138	0.347141	0	0.764099	5.75096	0.330713	2.09275	3.05089	0.23519	0	0.00574757	0	0	0	0	0	0.0668821	0	0	0	0	0.0395561	2.62899	0	0.00574757	0	0	0	0	0.552624	0	0
GABA.MGE.SST.CHODL	3	4.04196	1.88491	0.490823	0	0.630529	5.23226	0.1012	2.30886	2.82826	0	0	0	0	0	0	0	0	0	0	0	0	0	0.0365962	0	0	0	0	0	0	0.0866572	0.324537	0.0314495	0
GABA.MGE.SST.CHODL	3	2.80371	1.50475	0.150945	0	1.25692	5.61302	0.122524	2.37479	3.78833	0	0	0	0	0	0.793503	0.0108036	0	0.0161619	0	0	0	0	0.108004	0.0108036	0.00541638	0	0	0	0	0	0	0	0
GABA.MGE.SST.CHODL	3	3.05476	1.85621	0.075011	0.189867	0.0202917	5.82775	0	2.48693	2.90449	0	0.00409141	0	0	0	0	0	0	0	0	0.00409141	0	0	0.0441103	0.229751	0	0.00409141	0	0.00409141	0	0	0	0	0
GABA.MGE.SST.CHODL	3	3.74309	2.37978	0.249666	0	0.872683	5.60639	0.00818659	2.6379	3.36026	0	0.00410167	0.00410167	0	0	0	0.00410167	0	0	0	0	0	0	0.0402788	3.56175	0	0.252863	0	0.00818659	0	0.200444	0.409153	0.00818659	0
GABA.MGE.SST.CHODL	3	2.86942	2.11822	0.223166	0	0.722531	5.89582	0	0.38546	3.83687	0	0	0	0	0	0	0	0	0	0.28771	0	0	0	0.0521914	2.0284	0.046525	0.0800512	0	0	0	0	0	0	0
GABA.MGE.SST.CHODL	3	3.3199	2.42164	0.266957	0	0.66088	6.40414	0.387222	0.684539	3.41787	0	0	0	0.154351	0	0	0.00922951	0	0	0	0	0	0.230812	0.0453186	2.36404	0.00922951	0	0	0	0.00922951	0	0	0	0
GABA.MGE.SST.CHODL	3	3.34941	1.93328	0.350463	0	0.234145	6.01775	0	1.89976	3.38903	0	0	0	0	0.0119208	0	0	0	0	0	0	0	0	0.0119208	0	0	0	0	0	0	0	0	0	0
GABA.MGE.SST.CHODL	3	3.45045	2.19643	0.404621	0	1.22431	5.85435	0.312976	2.86805	3.37118	0	0	0	0	0.0130392	0	0	0	0	0	0	0	0	0.0130392	2.62821	0	0.179709	0	0	0	0	0.283761	0	0
GABA.MGE.SST.CHODL	3	3.64984	2.1946	0.647934	0	0.798568	5.8406	0.050498	2.46231	3.46522	0	0	0	0	0	0.545301	0	0	0	0	0	0	0	0	0.205303	0	0	0	0	0	0.0406004	0.0103057	0	0
GABA.MGE.SST.CHODL	3	2.99011	1.49874	0.334942	0	0.334942	5.72376	0.0609256	2.52037	3.51151	0	0	0	0	0	0	0	0	0	0	0	0	0	0	2.70724	0.0207237	0	0	0	0	0.0804363	0.642074	0	0
GABA.MGE.SST.CHODL	3	3.40772	2.02058	0.589816	0	0.740391	5.94567	0.018733	2.24328	3.24154	0	0	0	0	0	0	0	0	0	0	0	0	0	0	2.01681	0	0	0	0	0	0	0.10747	0	0
GABA.MGE.SST.CHODL	3	3.28607	1.92646	0.33699	0	1.26697	5.5213	0.120006	2.7396	3.24433	0	0	0	0	0	0	0	0	0	0	0.0180509	0	0	0	0	0	0.255755	2.04633	0	0.0180509	0.136032	0.197684	0	0
GABA.MGE.SST.CHODL	3	3.495	1.71588	0.28837	0	1.03976	5.54592	0.111515	1.82938	3.51216	0	0	0	0	0	0.019471	0	0	0	0	0.179499	0	0	0	1.90532	0.019471	0.0757077	0	0	0	0	0.345643	0	0
GABA.MGE.SST.CHODL	3	4.22826	2.03827	0.315513	0	1.07747	6.41649	0.708258	1.31383	3.44017	0	0	0	0.0792142	0.170149	0	0	0	0	0	0	0	0	0.0203995	2.28239	0	0	0	0	0.0203995	0.0203995	0.0792142	0	0
GABA.MGE.SST.CHODL	3	2.95504	1.61254	0.425715	0	0.366195	5.8303	0	2.50845	3.13343	0	0	0	0	0	0.0175348	0	0	0	0	0.262919	0	0	0.0175348	0.249226	0	0.48189	1.72893	0	0	0	0	0	0
GABA.MGE.SST.CHODL	3	3.32785	1.93501	0.304441	0	1.56193	6.39015	0.393033	1.54867	3.53285	0	0	0	0	0	0	0	0	0	0	0	0	0	0	2.7222	0	0	0	0	0	0	0	0	0
GABA.MGE.SST.CHODL	3	3.51242	2.11932	0.324332	0	0.180117	6.0431	0	1.96427	3.64698	0	0	0	0	0	0.0115424	0	0	0	0.404931	0	0	0	0	2.78766	0	0.412645	0	0	0	0	0	0.199323	0
GABA.MGE.SST.CHODL	3	3.18075	2.16116	0.299827	0	0.852511	5.5002	0.0715417	2.70067	3.41061	0	0	0	0	0	0	0	0	0	0	0.0516181	0	0	0	0.0209681	0	0	0	0	0	0	0.368094	0	0
GABA.MGE.SST.CHODL	3	2.96724	1.81809	0.12278	0	1.06914	5.53057	0	2.29272	3.6565	0	0	0	0	0	0	0	0	0.00928783	0.0276086	0	0	0	0	0	0	0	0	0	0.0719939	0.23212	0.51949	0	0
GABA.MGE.SST.CHODL	3	3.21592	1.17345	0.20528	0	0.288338	5.83062	0	2.41803	3.48611	0	0	0	0	0	0.20528	0	0	0.0150771	0	0	0	0	0	0.180225	0	0.0299302	0	0	0	0.154526	0.167458	0	0
GABA.MGE.SST.CHODL	3	2.00062	1.54904	0.844295	0	2.10533	6.20794	0.0658039	2.13793	2.75746	0	0	0	0	0	0.0334431	0	0	0	0.0334431	0	0	0	0	0	0	0.518897	0	0	0	0.267029	0.213546	0.157041	0
GABA.MGE.SST.CHODL	3	3.06741	1.69662	0.145592	0	0.685682	5.65173	0	2.14274	3.70723	0	0	0	0	0	0.126047	0	0	0	0	0	0	0	0	0.566014	0	0.183573	0.164763	0	0	0	0.183573	0	0
GABA.MGE.SST.CHODL	3	2.92785	0.988928	0.25835	0	0.948237	6.19655	0.393653	0.850135	3.76169	0	0	0	0	0	0	0	0	0	0	0	0	0	0	3.06562	0	0.237435	0	0	0	0.298911	0.778942	0	0
GABA.MGE.SST.CHODL	3	3.01914	1.847	0.140765	0	1.25106	5.92128	0.391132	1.90863	3.16646	0	0	0	0	0	0	0	0	0.618713	0	0	0	0	0	2.14388	0	0.162413	0	0	0	0	0	0	0
GABA.MGE.SST.CHODL	3	3.32638	1.29455	0.295508	0	1.67676	6.22621	0.264946	2.17549	3.49327	0	0	0	0	0.0200223	0	0	0	0	0	0	0	0	0.0200223	2.8437	0	0	0	0	0	0	0	0	0
GABA.MGE.SST.CHODL	3	2.58565	1.32401	0.360751	0	1.49856	6.21804	0	2.7159	3.00464	0	0	0	0	0	0	0	0	0.461497	0	0	0	0	0	0	0	0	0	0	0	0	0	0.265501	0
GABA.MGE.SST.CHODL	3	2.92269	1.42904	0.196754	0	0.967301	5.88363	0.434125	1.96763	3.10502	0	0	0	0	0	0.0425699	0	0	0.122631	0	0.298556	0	0	0	1.53284	0	0.614123	0	0	0	0	0.376128	0	0
GABA.MGE.SST.CHODL	3	2.95174	1.96453	0.24506	0	0.788301	5.78665	0.236328	1.80257	3.53357	0	0	0	0	0	0.0952841	0	0	0.0952841	0	0	0	0	0	2.37413	0	0.53051	0	0	0	0	0.523954	0	0
GABA.MGE.SST.CHODL	3	3.50053	2.03316	0.365245	0	1.02556	5.91038	0.0248803	2.406	3.75963	0	0	0	0	0	0	0	0.0125175	0	0	0	0	0	0	0.842687	0	0.194032	0	0	0	0	0.0728574	0	0
GABA.MGE.SST.CHODL	3	3.3173	2.04641	0.279751	0	0.940926	5.98805	0.109937	1.97197	4.12728	0	0	0.407841	0.0380046	0.0128294	0.345845	0	0	0	0	0	0	0	0	3.24802	0	0.0625616	0	0.0625616	0	0.166165	0	0	0
GABA.MGE.SST.CHODL	3	3.66742	2.00831	0.239909	0	1.44511	5.82146	0	2.71387	3.549	0	0	0	0	0	0.166154	0	0	0	0	0	0	0	0.0112339	1.97281	0.0112339	0.403515	0.61372	0	0	0	0.503945	0.230981	0
GABA.MGE.SST.CHODL	3	3.82727	2.13883	0.305012	0	0.459698	5.80662	0.312947	2.10385	3.94205	0	0	0	0	0	0	0	0.0107493	0.0107493	0	0	0	0	0.0107493	3.29872	0	0.0628283	0.102623	0	0	0	0.58162	0	0
GABA.MGE.SST.CHODL	3	3.72085	1.69591	0.405143	0	1.14581	5.74688	0.174787	1.49348	3.66714	0	0	0	0	0	0	0	0.0145848	0	0	0	0	0	0	2.68535	0	0.334095	0	0	0	0	0.0145848	0	0
GABA.MGE.SST.CHODL	3	3.28267	1.46077	0.467774	0	0.990696	6.063	0.1597	2.71233	3.00289	0	0	0	0	0	0	0	0	0	0	0	0	0	0	0	0	0	0	0	0	0	0.282979	0.0190571	0
GABA.MGE.SST.CHODL	3	3.20239	1.00734	0.482933	0	0.52052	5.86877	0	2.52785	3.64575	0	0	0	0	0	0.0602312	0	0	0	0	0	0	0	0	2.83544	0	0	0	0	0	0	0	0	0
GABA.MGE.SST.CHODL	3	3.31971	1.13171	0.182398	0	0.779573	5.82042	0	2.17288	3.32404	0	0	0	0	0	0	0	0	0.24696	0	0	0	0	0	0	0.0198116	0	0	0	0	0.148483	0.076995	0	0
GABA.MGE.SST.CHODL	3	2.88964	1.30289	0.352087	0	1.05711	6.25657	0	1.94187	3.63791	0	0	0	0	0	0	0	0	0	0	0	0	0	0	0.528481	0	0	0	0	0	0.13777	0.0208821	0	0
GABA.MGE.SST.CHODL	3	2.98107	1.76968	0.148864	0	0.47399	5.97729	0	2.28708	3.08334	0	0	0	0	0	0.0176778	0	0	0	0	0	0	0	0	3.46118	0	0	0	0	0	0	0	0	0
GABA.MGE.SST.CHODL	3	3.31769	1.90644	0.14768	0	1.085	5.73031	0	1.93844	3.41088	0	0	0	0	0	0.214073	0	0	0	0	0	0	0	0	2.56612	0	0.139062	0	0	0	0	0	0	0
GABA.MGE.SST.CHODL	3	3.90414	1.82607	0.350739	0	0.941933	5.472	0.358108	1.79515	3.33081	0	0	0	0	0	0.0207883	0	0	0	0	0	0	0	0	2.83729	0	0	0	0	0	0.0411532	0.0104481	0	0
GABA.MGE.SST.CHODL	3	4.18556	1.7732	0.219336	0	1.22118	5.25583	0.23157	2.86704	2.80223	0	0	0	0	0	0.115669	0	0	0	0	0	0	0	0	0.429496	0	0.194409	0	0	0	0.0152118	0.56023	0.290591	0
GABA.MGE.SST.CHODL	3	3.52371	1.70291	0.4033	0	1.21466	5.80038	0.244542	2.33444	3.41803	0	0	0	0	0	0	0	0	0	0	0	0	0	0	0	0	0.428509	0	0	0	0	0	0	0
GABA.MGE.SST.CHODL	3	3.79772	2.3039	0.201623	0	0.858552	5.26573	0.278019	2.45985	2.83585	0	0	0	0	0	0	0	0	0	0	0	0	0	0	0.161118	0	0.255706	0	0	0	0.201623	0.43431	0	0
GABA.MGE.SST.CHODL	3	3.54385	2.04964	0.227365	0	1.24822	6.00054	0	2.78377	3.16883	0	0	0	0	0	0	0	0	0	0	0	0	0	0	1.67152	0	0	0	0	0	0	0.111385	0	0
GABA.MGE.SST.CHODL	3	3.45021	2.47411	0.474271	0	1.12513	5.51214	0	1.96783	3.39941	0	0	0	0	0	0.682904	0	0	0.0670542	0	0	0	0	0	2.9123	0	0	0	0	0	0	0.341781	0	0
GABA.MGE.SST.CHODL	3	3.56764	1.86172	0.398066	0	0.823636	5.66534	0	2.55021	3.11786	0	0	0	0	0	0	0	0	0	0	0	0	0	0	0.115323	0	0	0	0	0	0	0.0093588	0	0
GABA.MGE.SST.CHODL	3	3.29126	2.07672	0.498153	0	0.976665	6.04487	0.0563288	2.42093	3.62051	0	0	0	0	0	0	0	0	0	0	0	0	0	0	2.00579	0	0	0	0	0	0.0871471	0.298379	0	0
GABA.MGE.SST.CHODL	3	3.40681	1.89906	0.257116	0	0.502838	5.75871	0.0248204	2.02387	3.0742	0	0	0	0	0	0	0	0	0	0	0	0	0	0	0.110895	0	0.0569842	0	0	0	0	0.687374	0	0
GABA.MGE.SST.CHODL	3	4.04225	2.47641	0.426334	0	1.75167	5.38968	0.0101718	2.7492	2.89953	0	0	0	0	0	0	0	0	0	0	0	0	0	0	0	0	0.432987	0	0	0	0.0880231	0.805166	0.259659	0
GABA.MGE.SST.CHODL	3	3.63228	1.6628	0.340248	0	1.49798	5.65675	0.236752	2.58129	3.10649	0	0	0	0	0	0	0	0	0	0	0	0	0	0	2.80352	0	0	0	0	0	0	1.05106	0	0
GABA.MGE.SST.CHODL	3	3.27466	1.84878	0.477102	0	1.1184	5.91073	0	1.88084	3.32564	0	0	0	0	0	0.00936216	0	0	0.18026	0	0	0	0	0	1.56076	0	0	0	0.188084	0	0	0.785989	0	0
GABA.MGE.SST.CHODL	3	3.3324	2.12407	0.393218	0	0.807106	5.56367	0.162137	2.13508	3.41338	0	0	0	0	0	0	0	0	0	0	0	0	0	0	2.59562	0	0.0628338	0	0	0	0	0.533028	0	0
GABA.MGE.SST.CHODL	3	3.36165	2.15505	0.363463	0	1.19496	5.90597	0.209563	2.70353	3.27241	0	0	0	0	0	0	0	0	0	0	0	0	0	0	3.03845	0	0	0	0	0.147156	0.0805934	0.268303	0	0
GABA.MGE.SST.CHODL	3	3.18781	1.54605	0.45938	0	0.524201	6.19405	0	2.56748	3.33783	0	0	0	0	0	0	0	0	0.276153	0	0	0	0	0	0.413707	0	0	0	0	0	0	0.390064	0	0
GABA.MGE.SST.CHODL	3	3.82275	1.77861	0.398402	0	1.11164	5.54316	0.127475	2.53454	3.61535	0	0	0	0	0	0.0529553	0	0	0	0	0	0	0	0	2.57469	0	0.361207	0	0	0	0	0.73604	0.15113	0
GABA.MGE.SST.CHODL	3	3.77253	1.92459	0.35171	0	1.0119	6.22227	0.268512	2.24217	3.57038	0	0	0	0	0	0.150241	0	0	0	0	0	0	0	0	2.94841	0	0	0	0	0	0	0.191238	0	0
GABA.MGE.SST.CHODL	3	3.66131	1.86759	0.378453	0	1.04384	5.76525	0.147238	2.46563	3.66943	0	0	0	0	0	0	0	0	0	0	0	0	0	0	3.30575	0	0.0909165	0	0	0	0	0.287523	0	0
GABA.MGE.SST.CHODL	3	3.03774	1.87297	0.216215	0	0.50578	6.57206	0.39389	1.25943	3.3627	0	0	0	0	0	0	0	0	0	0	0	0	0	0	2.55838	0	0	0	0	0	0	0.664507	0	0
GABA.MGE.SST.CHODL	3	3.23902	2.20364	0.288839	0	0.716126	6.09804	0.0995276	2.28355	3.68816	0	0	0	0	0	0.118297	0	0	0	0	0	0	0	0	0.512676	0	0.0608969	0	0	0	0	0.447952	0	0
GABA.MGE.SST.CHODL	3	2.95331	1.63336	0.426025	0	1.06638	6.1018	0.0707038	2.65879	3.28524	0	0	0	0	0	0	0	0.152586	0	0	0.198679	0	0	0	0	0	0	1.39635	0	0	0	0.659646	0.198679	0
GABA.MGE.SST.CHODL	3	3.684	2.32927	0.441771	0	1.60238	5.86839	0.142567	2.33485	3.51623	0	0	0	0	0	0	0	0	0.338063	0	0	0	0	0	0.338063	0	0.0914562	1.47501	0	0	0.125818	0.489851	0	0
GABA.MGE.SST.CHODL	3	3.22296	1.92129	0.265851	0	0.361206	6.07137	0.160437	2.04684	3.85722	0	0	0	0	0	0	0	0	0	0	0	0	0	0	1.67721	0	0	0	0	0	0.0425861	0.502343	0	0
GABA.MGE.SST.CHODL	3	3.16288	1.89024	0.208471	0	1.17578	6.09027	0.109658	2.26131	3.37554	0	0	0	0	0	0.367604	0	0	0	0	0	0	0	0	0	0	0	0	0	0	0	0.254442	0	0
GABA.MGE.SST.CHODL	3	2.32653	1.64022	0.103798	0	0.814406	6.35847	0.324124	1.12433	3.42056	0	0	0	0	0	0	0	0	0	0	0	0	0	0	0	0	0.0532454	0	0	0	0	0	0.283772	0
GABA.MGE.SST.CHODL	3	2.93617	1.91629	0.479519	0	0.79333	6.15285	0.305475	1.75842	2.84122	0	0	0	0	0	0	0	0	0	0	0	0	0	0	0	0	0	0	0	0	0	1.04588	0	0
GABA.MGE.SST.CHODL	3	2.92382	1.51785	0.35964	0	0.596464	5.85902	0.312053	2.31967	3.72171	0	0	0	0	0	0	0	0	0	0	0.998648	0	0	0	3.0103	0	0	0	0	0	0	0.274815	0	0
GABA.MGE.SST.CHODL	3	2.89946	2.02885	0.0920581	0	0.571786	6.30635	0.047088	1.99336	3.35097	0	0	0	0	0	0	0	0	0	0	0	0	0	0	2.58917	0	0.393489	0	0	0	0	0.0238211	0	0
GABA.MGE.SST.CHODL	3	2.57348	1.51893	0.301828	0	0.104453	6.9213	0	0	3.55597	0	0	0	0	0	0.991615	0	0	0	0	0	0	0	0	1.85552	0	0.466595	0	0.710479	0	0.0430989	0	0	0
GABA.MGE.SST.CHODL	3	1.0786	1.0786	0.391658	0.148257	2.1003	6.35412	0	2.81993	3.42656	0	0	0	0	0	0	0	0	0	0	0.422055	0	0	0	0	0	0	0	0	0	0	0	0.0225734	0
GABA.MGE.SST.CHODL	3	2.589	0.804614	0.224228	0	1.08821	6.08361	0.02073	2.58742	3.39876	0	0	0	0	0	0	0	0	0	0	0.289037	0	0	0	0	0	0	0	0	0	0	0.868132	0	0
GABA.MGE.SST.CHODL	3	2.62213	1.60031	0.40321	0	0.859132	6.00459	0.229131	2.36444	3.12255	0	0	0	0	0	0	0	0	0	0	0.378323	0	0	0	0	0	0	0	0	0	0	0.214397	0	0
GABA.MGE.SST.CHODL	3	3.63404	1.91535	0.426805	0	1.27961	5.4552	0.0644237	2.51601	3.32805	0	0	0	0	0	0.0644237	0	0	0	0	0.658359	0	0	0	1.56716	0	0	0.382408	0	0	0.0644237	0.549269	0.658359	0
GABA.MGE.SST.CHODL	3	2.0933	2.08032	0.561326	0.487043	1.19417	6.90333	0.223942	1.29648	3.02625	0	0	0	0.154721	0	0	0	1.24964	0	0	0	0	0	0	2.1938	0	0	0	0	0	0	0.705526	0	0
GABA.MGE.SST.CHODL	3	2.47493	1.23513	0.0773322	0	0.715502	6.01341	0	1.99128	3.03907	0	0	0	0	0	0	0	0	0	0	0.298922	0	0	0	1.85843	0	0.0522135	0	0	0	0	0	0	0
GABA.MGE.SST.CHODL	3	2.70375	0.857367	0.373159	0	1.28861	6.25891	0.0213101	2.57298	3.67713	0	0	0	0	0	0	0	0.0626146	0	0	0	0	0	0	2.23383	0	0	0	0	0	0	0.312004	0	0
GABA.MGE.SST.CHODL	3	3.526	2.65561	0.362586	0	1.52251	5.83735	0.0511159	2.56705	3.18772	0	0	0	0	0	0.0173306	0	0	0	0	0	0	0	0	2.98884	0	0.477387	0	0	0	0	0.0997456	0	0
GABA.MGE.SST.CHODL	3	2.60455	1.98274	0.578198	0	1.81438	6.22289	0	2.42255	2.76003	0	0	0	0	0	0	0	0	0	0	0	0	0	0	0.430607	0	0	0	0	0	0	0.398282	0	0
GABA.MGE.SST.CHODL	3	3.11097	2.22951	0.381051	0	0.736301	5.66778	0	1.9348	3.38645	0	0	0	0	0	0.0350569	0	0	0	0	0	0	0	0	2.9226	0	0.0689263	0	0	0	0.356375	0.528115	0	0
GABA.MGE.SST.CHODL	3	2.69236	1.20639	0.514059	0	1.28736	6.18289	0	1.62874	3.00393	0	0	0	0	0	0	0	0	0	0	0	0	0	0	0	0	0	0	0	0	0	0	0	0
GABA.MGE.SST.CHODL	3	2.83112	2.22412	0.489536	0	1.12171	5.81032	0.19105	1.98037	2.80386	0	0	0	0	0	0.131332	0	0	0	0	0	0	0	0	0.629763	0	0	0	0	0	0	0	0	0
GABA.MGE.SST.CHODL	3	3.27633	2.68195	0.518338	0	0.807749	5.59011	0	1.84573	3.17534	0	0	0	0	0	0	0	0	0	0	0	0	0	0	0.184257	0	0	0	0	0	0	0.500975	0	0
GABA.MGE.SST.CHODL	3	2.96043	2.29451	0.427774	0	1.06916	5.70628	0	1.85013	2.95	0	0	0	0	0	0	0	0	0	0	0	0	0	0	0	0	0.0852352	0	0	0	0	0.550447	0.352502	0
GABA.MGE.SST.CHODL	3	2.84777	2.56398	0.57651	0	0.866377	6.00536	0.086798	1.73676	3.58103	0	0	0	0	0	0	0	0	0	0	0	0	0	0	0.626202	0	0.103289	0	0	0	0	0	0	0
GABA.MGE.SST.CHODL	3	2.99262	2.37535	0.509127	0	0.891307	5.79956	0	2.13414	3.25614	0	0	0	0	0	0.0881938	0	0	0	0	0	0	0	0	1.05167	0	0	0	0	0	0.0538439	0.53105	0	0
GABA.MGE.SST.CHODL	3	3.23871	2.10143	0.567722	0	0.847446	5.50883	0.177985	2.18236	3.06034	0	0	0	0	0	0	0	0	0	0.126515	0	0	0	0	0.250539	0.0439743	0.0439743	0	0	0	0	0.086096	0	0
GABA.MGE.SST.CHODL	3	3.71666	2.66471	0.331496	0	1.12248	5.15605	0.657017	2.80166	2.94866	0	0	0	0	0	0	0	0	0	0	0	0	0	0	2.49129	0	0	0	0	0	0.381524	0.49663	0	0
GABA.MGE.SST.CHODL	3	3.48114	2.45765	0.589469	0	0.8621	5.16235	0.485249	2.08182	3.13976	0	0	0	0	0	0	0	0	0.112406	0	0	0	0	0	2.3754	0	0.0854671	0	0	0	0	0	0	0
GABA.MGE.SST.CHODL	3	3.46981	1.95454	0.453614	0	1.59605	5.37431	0.303449	2.66753	3.10633	0	0	0	0	0	0	0	0	0	0	0.875973	0	0	0	0	0	0	0	0	0	0.328071	0.593514	0	0
GABA.MGE.SST.CHODL	3	3.04926	1.39257	0.368404	0	1.14242	5.89624	0.138435	2.68763	3.32302	0	0	0	0	0	0.274224	0	0	0	0	0.138435	0	0	0	0	0	0	0	0	0	0	0.138435	0	0
GABA.MGE.SST.CHODL	3	3.8253	1.96147	0.0610828	0	0.869498	5.74471	0.0610828	2.64627	3.19328	0	0	0	0	0	0	0	0	0	0	0	0	0	0	1.90684	0	0.697035	1.22186	0	0	0.17308	0	0	0
GABA.MGE.SST.CHODL	3	3.66548	1.92624	0.341982	0	1.20295	5.52715	0.341982	2.2996	3.20236	0	0	0	0	0	0	0	0	0	0	0	0	0	0	0	0	0.110195	0	0	0	0	0.0192299	0	0
GABA.MGE.SST.CHODL	3	3.5593	1.44803	0.397574	0	1.90955	5.50471	0.347753	2.56265	3.36697	0	0	0	0	0	0	0	0	0	0	0	0	0	0	0	0	0	0	0	0	0	0	0	0
GABA.MGE.SST.CHODL	3	3.76969	1.70959	0.368107	0	0.848007	5.4711	0	2.04989	3.12022	0	0	0	0	0	0.0152282	0	0	0	0	0	0	0	0	3.14827	0	0	0	0	0	0	0	0	0
GABA.MGE.SST.CHODL	3	3.72298	1.85482	0.653213	0	1.42459	5.54323	0.330042	1.18672	3.15095	0	0	0	0	0	0	0	0	0.37902	0	0	0	0	0	1.91009	0	0.0932687	0	0	0	0	0.0410418	0	0
GABA.MGE.SST.CHODL	3	3.49303	1.95078	0.379551	0	1.48823	5.43966	0	2.38955	3.05693	0.0943283	0	0	0	0	0.0638636	0	0	0	0	0	0	0	0	0	0	0	0	0	0	0	0.592138	0	0
GABA.MGE.SST.CHODL	3	3.25736	1.89157	0.363901	0	1.33641	5.51406	0	2.56671	3.41221	0	0	0	0	0	0.3233	0	0	0	0	0	0	0	0	0	0	0	0	0	0	0	0.350549	0	0
GABA.MGE.SST.CHODL	3	3.19225	2.07143	0.414617	0	0.627778	5.6353	0	2.3616	3.06567	0.255532	0	0	0	0	0	0	0	0.158083	0	0	0	0	0	2.01825	0	0	0	0	0	0.39173	0.39173	0.186908	0
GABA.MGE.SST.CHODL	3	3.41699	2.49024	0.446123	0	1.1659	5.47575	0.0772577	2.55936	2.9915	0	0	0	0	0	0.199573	0	0	0	0	0	0	0	0	0	0	0	0	0	0	0.148972	0.674905	0	0
GABA.MGE.SST.CHODL	3	3.68346	2.1037	0.324977	0	1.49425	5.91908	0.51189	2.32256	3.13309	0	0	0	0	0	0	0	0	0	0	0	0	0	0	0.450366	0	0	0	0	0	0.0949057	0.485985	0.250325	0
GABA.MGE.SST.CHODL	3	2.53662	0.922397	0.395871	0	1.73043	6.03818	0	2.31557	2.7688	0	0.421687	0	0	0	0	0	0	0	0	0	0	0	0	0.0748369	0	0	0	0	0	0.0381184	0.36937	0	0
GABA.MGE.SST.CHODL	3	2.82835	1.57122	0.60199	0	1.94463	5.70481	0	2.01498	3.36201	0	0	0	0	0	0	0	0	0	0	0	0	0	0	0	0	0	0	0	0	0	0.934555	0	0
GABA.MGE.SST.CHODL	3	3.08017	1.38934	0.519226	0	1.30992	5.76162	0	2.32139	3.28393	0	0	0	0	0	0	0	0	0	0	0	0	0	0	0	0	0	0	0	0	0	0.18583	0.26722	0
GABA.MGE.SST.CHODL	3	3.6907	1.58637	0.354777	0	1.28817	6.12082	0.379361	1.13513	3.37645	0	0	0	0	0	0.0175887	0	0	0.277175	0	0	0	0	0	1.81866	0	0	0	0	0	0.207563	0.460938	0.178303	0
GABA.CGE.VIP.CALB2	4	3.60372	2.56477	0.825418	0	0	0	0.373095	0	1.53986	0	0.0091867	2.55335	0	0.200077	0.0538954	0.0091867	0.251614	0.145738	0	0	0.86505	0	6.25849	3.2705	0.709833	2.74906	0	3.46315	0	0	0.0966904	0	0
GABA.CGE.VIP.CALB2	4	3.05557	2.93327	0.66028	0	0	0	0.282532	0	2.75314	0	0	0.912781	0.994367	0	0.220796	0	0	0	0.608825	0	1.10548	0.780427	5.0124	0	1.84803	1.9074	0	2.46063	0	0.608825	1.07884	0	0
GABA.CGE.VIP.CALB2	4	3.37925	2.6534	0.4446	0	0	0	0.28166	0	2.25647	0	0	2.75223	0	0	0	0	0.0371308	0.580448	0.545988	0	1.51143	2.32904	6.07829	0.228915	1.93061	2.19268	0	2.92427	0	0.293012	0.642025	0	0
GABA.CGE.VIP.CALB2	4	3.72174	1.86888	0.216726	0	0	0.00651935	0.0571984	0	0.639783	0	0	1.64974	0.367946	0	0	0	1.20055	1.84126	1.06811	0	1.36703	2.02808	6.46636	3.15169	3.96432	2.60746	0	2.35544	0	0	1.37367	0	0
GABA.CGE.VIP.CALB2	4	2.75585	2.02238	0.579982	0	0	0	0.317936	0	1.12202	0	0	2.86611	0	0	0	0	0	0.722941	1.52999	0	1.96548	0.637663	5.81306	4.23033	0.00621876	1.36595	0	0	0	0	0	0	0
GABA.CGE.VIP.CALB2	4	2.84582	3.30225	0.511055	0	0	0	0	0	1.52892	0	0	1.9498	0	0	0.548455	0	1.08299	0	0	0	0.194257	0.864493	5.97743	0	2.43525	2.80294	0	2.81442	0	0	0	0	0
GABA.CGE.VIP.CALB2	4	3.10055	1.19913	0.551447	0	0	0	0	0	1.7801	0	0	0.974229	0	0	0.0414156	0	0	1.03912	1.00874	0	0.990065	0	5.49208	3.5103	0.00842148	1.89705	0	0	0	0	1.33481	0	0
GABA.CGE.VIP.CALB2	4	3.39136	2.57558	0.676315	0	0	0	0.386669	0	1.41152	0	0	1.85904	0	0	0	0.0861024	0.0861024	0	0	0	0.460248	1.4752	6.24035	0	3.19094	2.56353	0	2.94712	0	0	0	0.0222305	0
GABA.CGE.VIP.CALB2	4	3.34924	2.96481	0.533751	0	0	0	0.365787	0	1.74161	0	0	1.80429	0	0	0	0	0	0	0.0130974	0	0.269884	1.80212	6.18339	0.650372	0.00657012	2.89403	0	1.2428	0	0	0	0	0
GABA.CGE.VIP.CALB2	4	3.80591	2.85184	0.466332	0	0	0	0.371835	0	2.05951	0	0	2.19207	0	0	0	0	0	2.15389	0	0	1.87336	0	5.83857	3.67421	0	2.37985	0	2.39917	0	0	0.774315	0	0
GABA.CGE.VIP.CALB2	4	2.58441	2.17473	0.194014	0	0	0	0	0	0.737621	0	0	1.92609	0	0	0	0	0	0.0101442	0.0101442	0	0.742485	0	5.31109	3.0772	0	0.508461	0	0	0	0	0.573735	0	0
GABA.CGE.VIP.CALB2	4	3.49284	2.88568	0.0450133	0	0	0	0.0450133	0	2.06532	0	0	1.71028	0	0	0	0	0	0	0.0361713	0	1.30031	0	5.57182	0	0	2.51024	0	2.1913	0	0	0	0	0
GABA.CGE.VIP.CALB2	4	3.56047	2.94107	0.898773	0	0	0	0.603362	0	1.00876	0	0	1.97771	0	0	0	0	0	1.70183	0.731483	0	1.03192	0.807539	5.89239	3.12702	0	0.530471	0	0	0	0	0.351549	0	0
GABA.CGE.VIP.CALB2	4	2.86825	2.54086	0.420492	0	0	0	0	0	2.63959	0	0	2.40807	0	0	0	0	0	0	0	0	1.84968	0	5.26766	3.85268	0.0100019	1.80274	0	0	0	0	0.308864	0	0
GABA.CGE.VIP.CALB2	4	3.13749	2.49479	0.361209	0	0	0	0.0083318	0	1.18398	0	0	2.18959	0	0	0	0	0	0	1.07592	0	1.48089	0	5.53293	0	0	1.57524	0	1.24603	0	0	0	0	0
GABA.CGE.VIP.CALB2	4	2.68008	1.70316	0.892805	0	0	0	1.31156	0	0.948129	0	0	2.70604	0.245148	0	0	0.00659276	0	2.04984	0.699142	0	1.82759	0	5.76195	4.22017	0	1.80282	0	0	0	0	0.546733	0	0
GABA.CGE.VIP.CALB2	4	2.91174	2.56545	0.630059	0	0	0	0.298456	0	1.70557	0	0	0.976851	0	0	0	0	0	0	0.35808	0	2.58187	0	5.07879	1.15356	0	1.78089	0	0	0	0	0.138933	0	0
GABA.CGE.VIP.CALB2	4	2.78773	2.45468	0.923918	0	0	0	0.639577	0	0.851653	0	0	0.226859	0	0	0	0.0174099	0	0	0	0	1.88076	0	5.25525	1.87134	0	1.66491	0	2.83162	0	0	0	0	0
GABA.CGE.VIP.CALB2	4	3.16567	1.611	0.135284	0	0	0	0	0	1.7661	0	0	2.03774	0.704921	0	0	0	0	0	0.625493	0	1.60131	1.59349	5.89318	0	2.97406	2.386	0	3.29396	0	0	0	0	0
GABA.CGE.VIP.CALB2	4	3.23925	2.6024	0.396156	0	0	0	0.712582	0	0.320014	0	0	1.52325	0.3905	0	0	0.434874	0	0	0.626809	0	2.06443	0.791576	5.73712	2.73754	0	1.92791	0	0.871818	0	0	0	0	0
GABA.CGE.VIP.CALB2	4	3.24361	1.64969	0.782578	0	0	0	0.770962	0	0.659863	0	0	1.95649	0	0	0	0	0	0.0125497	0.66637	0	0.646721	0	5.25465	2.56862	0	1.61262	0	0.400467	0	0	1.39399	0	0
GABA.CGE.VIP.CALB2	4	3.4332	0	0.161659	0	0	0	0.687185	0	0.0712758	0	0	2.55248	0	0	0.0273272	0	0	0	0.0091923	0	0.903535	0.27306	5.99013	3.0251	0.0091923	2.40052	0	0.682529	0	0	1.04624	0	0
GABA.CGE.VIP.CALB2	4	4.09456	3.29878	0.563056	0	0	0.0140325	0.474774	0	2.24458	0	0	2.40794	0	0	0	0	0.443526	0.0140325	0.582975	0	1.23479	0.420592	5.33351	1.30234	0	2.57181	0	1.25916	0	0	0	0	0
GABA.CGE.VIP.CALB2	4	3.21202	3.12973	0.213857	0	0	0	0.990358	0	2.62795	0	0	1.30829	0	0	0	0	0	1.0213	1.03232	0	1.25052	0.102273	6.2391	2.42202	0	0.738234	0	0	0	0	0	0	0
GABA.CGE.VIP.CALB2	4	2.61351	2.86678	0.792488	0	0	0	0.246058	0	2.75969	0	0	1.53183	0	0	0	0	0	0.484302	0	0	1.51767	0	5.90357	2.74784	0	1.49707	0	0	0	0	0.381825	0	0
GABA.CGE.VIP.CALB2	4	3.27038	2.259	0.130792	0	0	0.019765	0.130792	0	1.90642	0	0	1.16495	0	0	0	0	0	2.05501	0	0	1.47784	2.12057	5.86687	3.28131	0.214739	2.6989	0	0	0.00993131	0	1.51143	0	0
GABA.CGE.VIP.CALB2	4	3.08379	3.23101	0	0	0	0.0091956	0.714857	0	3.22442	0	0	1.84827	0.4047	0	0	0	0	0.0091956	0	0	1.93464	0.429054	5.73246	0	0	2.31431	0	0.0091956	0	0	0	0	0
GABA.CGE.VIP.CALB2	4	2.60455	2.60684	0.293282	0	0	0.00771609	0.917375	0	3.03712	0	0	2.38799	0.208946	0	0	0	0	1.21269	0	0.00771609	1.39151	0	6.27071	2.1579	0	2.20511	0	0	0	0	0	0	0
GABA.CGE.VIP.CALB2	4	3.85159	3.14355	0.00861565	0	0	0.00861565	0.872595	0	2.54354	0	0	2.61441	0	0	0	0	0	0.959134	0.09879	0	0.406709	0.478935	5.83132	2.46064	0	2.52639	0	0.462724	0	0	0	0	0
GABA.CGE.VIP.CALB2	4	3.71946	2.61498	0.213268	0	0	0	0.388952	0	2.3318	0	0	2.63527	0	0	0.0814867	0	0	0.600768	0.553091	0	1.46903	0	4.91301	2.5968	0	1.90162	0	0.104692	0	0	0	0.0657119	0
GABA.CGE.VIP.CALB2	4	2.74532	1.18255	0.19592	0	0	0	0.211965	0	1.56806	0	0.00978961	2.51068	0.419629	0	0	0	0	0	0	0	2.39834	0	5.83471	3.10187	0	1.06425	0	0	0	0	1.79789	0	0
GABA.CGE.VIP.CALB2	4	3.65124	2.97185	0	0	0	0	0.228994	0	1.79876	0	0	1.44095	0	0	0.0159554	0.0159554	0	0.715603	0.0994308	0	1.45231	1.47464	6.20072	3.12892	0.00800953	2.6592	0	1.87928	0	0	0.254255	0	0
GABA.CGE.VIP.CALB2	4	2.66866	2.43813	0.664449	0	0	0	0.0799592	0	2.94827	0	0	2.74221	0	0	0	0	0	0	0.113543	0	1.67309	0	4.9336	3.54125	0	1.46976	0	0	0	0	0	0	0
GABA.CGE.VIP.CALB2	4	3.07359	3.32408	0.708514	0	0	0.0105725	0.300654	0	2.7393	0	0	1.05082	0	0	0	0	0	0	0	0	0.120041	0	4.22469	1.52903	0	2.23921	0	0	0	0	0	0	0
GABA.CGE.VIP.CALB2	4	4.28304	2.03317	0.270027	0	0	0	0.333264	0	0	0	0	2.37182	0.219827	0	0	0	0.0820564	1.53583	0.12069	0	0.893268	1.61116	6.26544	2.04845	4.78238	2.52931	0	2.18961	0	0	1.18035	0	0
GABA.CGE.VIP.CALB2	4	3.08863	2.72917	0.366185	0	0	0	0.0129227	0	2.2347	0	0	1.51244	0	0	0	0	0	0	0	0	2.08157	1.31678	5.74606	3.30208	0	1.99961	0	0	0	0	0	0	0
GABA.CGE.VIP.CALB2	4	2.91713	2.30684	0.412669	0	0	0	0.421413	0	0.136239	0	0	2.34571	1.49436	0	0	0	0.335086	1.09093	0.170386	0.197976	1.35395	0.301304	5.75987	3.80398	2.24905	2.80283	0	0	0	0	0	0	0
GABA.CGE.VIP.CALB2	4	3.97935	2.5422	0.576898	0	0	0.00893133	0	0	0.279878	0	0	1.81929	0	0	0	0	0	1.2814	1.14554	0	0.591901	1.14269	6.22697	2.42789	0	2.28156	0	1.69722	0	0	0.53049	0	0
GABA.CGE.VIP.CALB2	4	2.81781	3.04577	0.634867	0	0	0	0.865563	0	3.20691	0	0	1.69435	0.321159	0	0	0.0091948	0	0.293994	0	0	0.498715	0.177293	5.97606	2.89274	0	2.38558	0	0	0	0	0.797197	0	0
GABA.CGE.VIP.CALB2	4	2.5311	2.20419	0.791234	0	0	0	0.820923	0	2.94127	0	0	1.97165	0	0	0	0.00945217	0.00945217	0.570559	0	0	0.829246	0	5.67287	2.83168	0.00945217	2.34473	0	0	0	0	0	0	0
GABA.CGE.VIP.CALB2	4	2.83971	0.623836	0.603672	0	0	0.700656	1.07422	0	0.618833	0	0	2.68269	0.927138	0	0	0.562082	0.178619	0	0	0	1.37189	1.75395	5.84165	3.62175	3.0398	3.22513	0	0	0	0	0	0	0
GABA.CGE.VIP.CALB2	4	2.29014	2.02035	0.964271	0	0	0.00984693	0.408576	0	1.60105	0	0	0.478422	0	0	0	0	0	1.96782	0	0	0.791752	0.994006	6.14906	3.45775	1.80115	2.34093	0	0	0	0	1.16525	0	0
GABA.CGE.VIP.CALB2	4	2.30005	2.56919	0.470537	0	0	0.0282104	0.158432	0	2.67383	0	0	1.35836	0	0	0	0	0	0.806413	0.00949218	0	1.09638	0.956387	5.92593	2.72325	0.00949218	1.68932	0	0	0	0	0	0	0
GABA.CGE.VIP.CALB2	4	2.96398	2.35862	0.123264	0	0	0.0093266	1.05898	0	3.32499	0	0	1.39756	0	0	0	0.0093266	0	0.919727	0	0	1.02257	0	6.04517	1.2823	0	2.22619	0	0	0	0	0	0	0
GABA.CGE.VIP.CALB2	4	3.90487	2.77202	0.569836	0	0	0	1.21582	0	1.35581	0	0	0	0	0	0	0.00765043	0	1.58637	0.0523632	0	1.06364	1.42465	5.81108	0.587062	2.80183	3.28252	0	0	0	0	1.06629	0	0
GABA.CGE.VIP.CALB2	4	3.2577	2.53625	0.183403	0	0	0.0142761	0.31761	0	2.89051	0.00716351	0	2.23963	0	0	0	0	0	0	0	0	1.61462	0.574609	5.82634	2.40961	0	1.02866	0	0	0	0.00716351	0.0353152	0.0827505	0
GABA.CGE.VIP.CALB2	4	3.23951	2.51877	0.217897	0	0	0.00969126	0.110522	0	2.27776	0	0	1.76972	0.161515	0	0	0	0	0.96928	0	0	1.35398	0.416163	5.9199	3.0054	0	2.10965	0	0.43525	0	0	1.01971	0	0
GABA.CGE.VIP.CALB2	4	2.97707	2.15529	0.470093	0	0	0.00853693	1.00498	0	2.07032	0	0	1.99743	0.0501615	0	0	0	0	1.02055	0.136059	0	1.19062	1.09782	6.17008	2.91861	0.0170016	1.85247	0	0	0	0	0.28201	0	0
GABA.CGE.VIP.CALB2	4	2.53305	1.9504	0.837937	0	0	0	0.0273328	0	2.25686	0	0	1.31996	0	0	0	0	0	0	0.62004	0	1.12435	0.00919418	5.16187	1.4341	0.00919418	2.65901	0	2.63678	0	0	0.307651	0	0
GABA.CGE.VIP.CALB2	4	3.32783	2.82907	0.00970168	0	0	0	1.51696	0	1.16417	0	0	0.645346	0	0	0	0	0	0	0	0	1.33702	0.848268	5.5085	0	0	1.44147	0	2.02943	0	0	0	0	0
GABA.CGE.VIP.CALB2	4	3.56349	0.833584	0.159208	0	0	0	0.516377	0	1.2798	0	0	0.524922	0	0	0	0	0	0	0.00716517	0	0.0627101	2.26852	5.6601	0.0627101	0.00716517	1.77566	0	2.14766	0	0	0	0	0
GABA.CGE.VIP.CALB2	4	3.99603	2.17217	0.436529	0	0	0	1.1087	0	0.854697	0	0	0	0	0	0	0.0261389	0	1.50902	0.497396	0	1.52452	2.03436	5.2307	3.24753	0	2.53087	0	2.95828	0	0	0	0	0
GABA.CGE.VIP.CALB2	4	2.78442	2.56868	0.966047	0	0	0	0.754598	0	0.425653	0	0	0.95234	0	0	0	0	0	0	1.26066	0	1.9179	0	4.85822	2.40901	0.0118528	1.11931	0	0.0118528	0	0	1.90557	0.365451	0
GABA.CGE.VIP.CALB2	4	3.98472	1.57077	1.35857	0	0	0	0.175307	0	0.97582	0	0	0.508281	0	0	0.254763	0	0	0.30443	0.31647	0	1.0796	1.89459	5.73302	2.75884	2.81941	2.32962	0	2.14524	0	0	1.25487	0	0
GABA.CGE.VIP.CALB2	4	3.63861	2.71444	0.207563	0	0	0	1.0566	0	1.90742	0	0	1.69244	0.617412	0	0	0	0	0.212616	0	0	1.26867	0	5.40691	2.66491	0	1.82849	0	0.540558	0	0	0	0	0
GABA.CGE.VIP.CALB2	4	3.45252	2.78324	0.309481	0	0	0.00695112	0.00695112	0	1.82738	0	0	1.70964	0	0	0	0	0.0138543	0	0	0	1.37738	0	4.81013	0.00695112	0	2.86718	0	2.05156	0	0	0	0	0
GABA.CGE.VIP.CALB2	4	3.35135	2.51113	0.281761	0	0	0.00720646	0.745061	0	1.96475	0	0	2.04181	0	0	0	0	0	0	1.09007	0	1.51379	0	6.01026	3.28048	0	1.68053	0	0	0	0	0	0	0
GABA.CGE.VIP.CALB2	4	3.59645	2.73315	0.110011	0	0	0.038031	0.482559	0	2.25829	0	0	1.96356	0	0	0	0	0.038031	1.81103	0	0	1.24728	0.529299	5.86935	3.49472	0	2.77992	0	2.22534	0	0.482559	1.34279	0	0
GABA.CGE.VIP.CALB2	4	3.0836	1.13681	0.702821	0	0	0.0192925	0.538981	0	0.873822	0	0	1.72111	0	0	0	0	0	0	0.583431	0	2.13082	1.26564	4.82724	2.75989	0	1.15334	0	0.139192	0	0	1.70117	0	0
GABA.CGE.VIP.CALB2	4	3.33985	2.93911	0.463493	0	0	0.0412527	1.06885	0	2.10435	0	0	2.46725	0.357379	0	0	0	0	1.17053	0.0412527	0	0.706861	0	5.46492	0	0	1.79791	0	2.11151	0	0	1.86534	0	0
GABA.CGE.VIP.CALB2	4	3.82829	2.58906	0.413283	0	0	0	0.73857	0	1.17493	0.755012	0	1.4207	0	0	0	0	1.32168	0	0	0	1.25965	0.401742	5.96222	3.68101	0	1.73918	0	2.13941	0	0.00863672	0.506356	0	0
GABA.CGE.VIP.CALB2	4	3.71669	3.14259	0.328557	0	0	0	0.538304	0	1.88767	0	0	2.33624	0	0	0	0	0	0	0.634443	0	0.805993	0.626775	5.7598	0.0213789	0	2.09391	0	1.01172	0	0	0.0213789	0	0
GABA.CGE.VIP.CALB2	4	3.97831	2.08968	0.434889	0	0	0.0148155	0.707977	0	1.68973	0	0.00743519	1.39375	0	0	0.00743519	0.00743519	0	0	0	0	1.80537	0.886002	5.66615	3.47874	0	2.43259	0	3.23195	0	0	0.996581	0	0
GABA.CGE.VIP.CALB2	4	4.16837	3.15372	0.496609	0	0	0.00865353	0.71863	0	2.61596	0	0	2.22157	0	0	0	0	0.0833395	0.348663	0	0	1.61075	0.00865353	4.92035	2.12362	0	1.86801	0	0	0	0	1.16007	0.0341737	0
GABA.CGE.VIP.CALB2	4	3.31107	1.90183	0.718067	0	0	0.0121407	0.574158	0	0.59795	0	0.00608879	3.18188	0	0	0.0241358	0.0121407	0	0.173389	0.303231	0	1.6537	2.08617	5.53434	4.21741	0	1.76736	0	0	0	0	0	0	0
GABA.CGE.VIP.CALB2	4	4.26398	2.64869	0.211631	0	0	0.00573212	0.746439	0	1.33941	0	0	0.615612	0	0	0.670014	0	0.5968	0	0.544833	0	2.15639	0.514369	5.00025	0	0	2.32442	0	2.98354	0	0	1.08528	0	0
GABA.CGE.VIP.CALB2	4	2.7779	1.81195	0.344125	0	0	0	0.827959	0	1.12687	0	0	1.4516	0	0	0	0.00802176	0	0.447107	0.297377	0	1.98653	0.242033	4.38747	0	0	2.30544	0	2.41127	0	0	1.78798	0	0
GABA.CGE.VIP.CALB2	4	2.3439	1.21717	0.223985	0	0	0	0	0	1.50571	0	0.303378	2.51178	0	0	0	0	0.734976	0	0.07124	0	1.35004	0	5.34352	3.68021	0	1.27038	0	0.00735677	0	0	0	0	0
GABA.CGE.VIP.CALB2	4	2.54001	1.67206	0.768234	0	0	0.0263763	0.554851	0	1.30093	0	0.674057	1.59918	0	0	0	0	0	0.660342	0.165861	0	2.16457	0	5.61862	3.28008	0.10759	1.2175	0	0	0	0	0	0	0
GABA.CGE.VIP.CALB2	4	2.70936	2.64401	0.394363	0	0	0.0165329	0.72605	0	2.70436	0	0	1.98004	0	0	0	0	0	0	0.454335	0	1.43326	0	5.13729	3.46725	0.00830061	0	0	0	0	0	0	0	0
GABA.CGE.VIP.CALB2	4	4.36553	2.10609	0.349597	0	0	0	0.275251	0.494514	0.490861	0	0	2.37165	0.43827	0	0.336873	0.00596072	0.554653	0.204722	0	0	1.49147	1.28112	6.01147	0	3.15075	2.23687	0	3.44397	0	0.744803	0.60487	0	0
GABA.CGE.VIP.CALB2	4	3.56342	2.69536	0.699763	0	0	0	0.642683	0	2.93514	0	0	2.09198	0	0	0	0	0	0	0	0	0.591022	0	5.78339	2.71562	0	2.39473	0	0.300887	0.00794689	0	0	0	0
GABA.CGE.VIP.CALB2	4	2.59143	1.83949	0.32773	0	0	0	0.543021	0	2.59092	0	0	1.46331	0	0	0	0	0	1.91144	0.389514	0	1.4116	0	5.97015	4.03866	0	1.87455	0	0	0	0	0.157084	0.185743	0
GABA.CGE.VIP.CALB2	4	3.46954	1.38795	0.238763	0	0	0.017067	0.183007	0	1.29967	0	0	1.55868	0	0	0	0	0	1.0137	0.103475	0	1.04243	1.08984	5.95125	3.19993	0.333546	2.44087	0	0	0	0	1.2839	0	0
GABA.CGE.VIP.CALB2	4	3.18943	1.57206	0.425959	0	0	0.00705582	0.885104	0	0.674466	1.62363	0	2.65264	1.64845	0	0	0	0.670853	0.750832	0.00705582	0	1.04913	1.39566	6.24225	3.43813	2.74957	3.10708	0	0.126223	0	0	0.397818	0	0
GABA.CGE.VIP.CALB2	4	3.97283	2.06922	0.45063	0	0	0.0329397	0.188657	0	1.21917	0	0	2.64098	0	0	0	0	0	0.869792	0	0	1.43703	0.247876	6.71921	3.05558	0	2.53744	0	2.78813	0	0	0.026438	0	0
GABA.CGE.VIP.CALB2	4	2.98701	1.33709	0.78321	0	0	0	0.906569	0	1.03741	0.682855	0	2.40065	0	0	0.189764	0	0.00650891	1.33538	0.0129757	0	0.871678	0.00650891	6.15304	3.95576	0	2.06633	0	0	0	0	0.044697	0	0
GABA.CGE.VIP.CALB2	4	3.96532	2.40367	0.342103	0	0	0	0.586423	0	2.71752	0	0	1.99882	0	0	0	0	0	0	0	0	1.45288	0	5.79598	1.97967	0.00606968	2.15859	0	0	0	0	0.958303	0.890686	0
GABA.CGE.VIP.CALB2	4	4.0202	1.90164	0.486845	0	0	0	0.00867304	0	1.30134	0	0	2.3779	0.408942	0	0	0	0	0.298941	0.167991	0	1.43226	1.43226	5.85456	1.63149	0	1.99827	0	2.32906	0	0	0.00867304	0.0509446	0
GABA.CGE.VIP.CALB2	4	2.65068	0.626753	0.9045	0	0	0	0.587174	0	1.67682	0	0	2.16315	0	0	0	0.00903741	0	0	1.6683	0	1.22547	0	5.20662	2.98023	0.00903741	1.15078	0	0	0	0	0	0	0
GABA.CGE.VIP.CALB2	4	4.56002	2.14291	0.193356	0	0	0	0.546507	0	1.01342	0	0	2.39671	0	0	0	0	0	1.24488	0	0	1.2079	0	6.64782	2.98032	0	3.34096	0	2.63646	0	0	0.995663	0	0
GABA.CGE.VIP.CALB2	4	3.41541	2.31896	0.200331	0	0	0.00883316	0.0434056	0	3.28178	0	0	0.947505	0	0	0	0	0	0	0	0	2.26332	1.58639	5.73721	0.63511	0.00883316	2.89917	0	0	0	0	0	0	0
GABA.CGE.VIP.CALB2	4	3.82388	2.66317	0.608825	0	0	0	0.574647	0	2.08571	0	0	2.85566	0.554579	0	0	0	0.651119	1.06372	0	0	1.44001	0.850678	5.52798	1.09077	0	2.02586	0	0.377644	0	0	0.0174939	0	0
GABA.CGE.VIP.CALB2	4	3.61845	1.443	0.787475	0	0	0	0.569421	0	1.77777	0	0	2.05857	0	0	0	0.406169	0.578242	2.32383	0	0	1.04374	1.84555	6.86564	2.37827	2.5542	3.05062	0	0	0	0	1.02706	0	0
GABA.CGE.VIP.CALB2	4	3.27894	2.73272	0.247299	0	0	0.016369	0.46114	0	2.89533	0	0	1.46643	0	0	0	0	0	0	0.0404307	0	1.39542	0.253723	6.19995	2.7203	0	2.46684	0	0	0	0	1.52018	0.00821797	0
GABA.CGE.VIP.CALB2	4	4.37554	2.51532	0.564197	0	0	0.0384596	0.486946	0	2.20141	0	0	2.26785	0.0754946	0	0	0.00651353	0.950867	0.567907	0.494946	0	0.920098	1.22327	5.91341	1.58682	0	2.31863	0	1.62999	0	0	1.59349	0.454294	0
GABA.CGE.VIP.CALB2	4	3.8635	1.4471	0.534776	0	0	0.0170985	1.03958	0	1.38215	0	0	0	0	0	0	0	0.364477	1.76576	1.0023	0	0.859677	1.9123	5.86939	3.12555	3.99511	3.19503	0	0	0	0	1.02422	0	0
GABA.CGE.VIP.CALB2	4	4.17899	2.83043	0.380011	0	0	0.00667766	0.847284	0.0199007	0.0329511	0	0	2.65741	0	0	0	0	0	0	0.750897	0	0.288931	1.36811	6.07022	2.26762	0	2.79626	0	2.91743	0	0	1.01113	0	0
GABA.CGE.VIP.CALB2	4	3.33254	2.1485	0.386871	0	0	0	0.0070255	0	1.03887	0	0	0.840875	0.168312	0	0	0.0070255	1.00073	0.574097	0.0481725	0	0.686643	0	5.01654	0.0070255	2.36308	2.34432	0	2.13275	0	0	0.908481	0	0
GABA.CGE.VIP.CALB2	4	3.68785	1.74811	0	0	0	0	0	0	0.87255	0	0	1.54374	0	0	0	0	0	1.24191	0	0	2.01867	2.28568	6.1997	2.42952	3.06611	3.4558	0	1.74285	0	0	0.595101	0	0
GABA.CGE.VIP.CALB2	4	3.9182	3.03882	0.241729	0	0	0	0.0849718	0	2.49569	0	0	2.53979	0	0	0	0	0.680847	0	0	0	0.00736335	0	5.50715	0	0	1.79478	0	0.735444	0	0	0.777072	0.0643961	0
GABA.CGE.VIP.CALB2	4	2.91048	1.57141	0.917271	0	0	0.00601581	0.445427	0	0.268294	0	0	2.62102	0	0	0	0	0	0	0.263669	0	1.50802	0.936377	5.96147	3.96871	0	1.57642	0	0	0	0	0	0	0
GABA.CGE.VIP.CALB2	4	3.58403	2.00771	0.00775519	0	0	0.00775519	0	0	0.977678	0	0	2.06659	0	0	0	0	0	0	1.18104	0	2.06065	0	4.7739	1.24581	0	2.04062	0	0	0	0	1.44792	0	0
GABA.CGE.VIP.CALB2	4	3.39584	2.93672	0.304325	0	0	0.00681728	0.0597443	0	0	0	0	1.67208	1.53601	0	0	0	0	1.21397	0	0	1.37501	2.91248	5.31487	3.65862	0	2.69999	0	0.466955	0	0	0	0	0
GABA.CGE.VIP.CALB2	4	3.44875	2.96397	0.548317	0	0	0	0.494607	0	1.37301	0	0	2.13058	0	0	0	0	0.18262	0	0.177221	0	1.18435	0.478716	5.50994	0	0	2.324	0	1.19419	0	0	0	0	0
GABA.CGE.VIP.CALB2	4	3.9865	2.86688	0.122447	0	0	0	0.505498	0	2.07309	0	0	2.96288	0.241804	0	0	0	0	0.334536	0.0129418	0	1.34198	1.38854	6.28909	2.34101	0	2.0053	0	2.00002	0	0.0257183	1.1513	0	0
GABA.CGE.VIP.CALB2	4	2.84456	2.77466	0	0	0	0	0	0	1.38515	0	0	2.01274	0	0	0.150359	0	0	0	0.548198	0	0.935164	0	5.56565	3.20407	0	2.21716	0	0.2128	0	0	0	0	0
GABA.CGE.VIP.CALB2	4	3.5673	2.53897	0.368733	0	0	0	0.159596	0	2.9971	0	0.0132227	2.50694	0.316775	0	0	0	1.11726	1.23037	0	0	0.587025	0.391486	5.76778	0.583318	0	2.25675	0	2.28356	0	0.0327345	0.702232	0	0
GABA.CGE.VIP.CALB2	4	3.53373	2.54734	0.516905	0	0	0.018457	0.160301	0	2.43641	0	0	2.63168	0.524284	0	0.0602429	0	0	0.598643	0	0	1.41667	1.8806	6.0358	0	0	2.78544	0	0.360929	0	0	0	0	0
GABA.CGE.VIP.CALB2	4	2.26953	2.84047	0.694098	0	0	0	0.222279	0	2.77747	0	0	2.6479	0	0	0	0.00620372	0.00620372	0.921154	0.335237	0.00620372	1.25323	0	5.70452	3.77169	0	0.908692	0	0	0	0	0.0245872	0	0
GABA.CGE.VIP.CALB2	4	2.41812	2.44841	0.311457	0	0	0.013443	0.475626	0	2.61602	0	0	2.45714	0	0	0	0	0	0.00674411	0.0200974	0	1.56924	1.74573	6.27462	0.00674411	0	1.65686	0	0	0	0	0	0	0
GABA.CGE.VIP.CALB2	4	4.25361	3.21831	0.540088	0	0	0.00541078	0.265302	0	1.59494	0	0	2.04409	0.0782395	0	0	0	0.112757	0.364269	0.589433	0.00541078	1.69242	0.00541078	5.53249	0	2.34775	2.28791	0	2.2172	0.0267658	0.819583	1.54181	0.00541078	0
GABA.CGE.VIP.CALB2	4	2.85202	2.23006	0.622103	0	0	0	0	0	2.40992	0	0	1.4996	0	0	0	0	0.00710561	0.00710561	0	0	0.114422	0.0554795	5.3694	0	1.16645	2.82108	0	2.38001	0	0	0.335995	0	0
GABA.CGE.VIP.CALB2	4	4.09032	0.937124	0.710539	0	0	0	0.462549	0	1.18303	0	0	2.4267	0	0	0	0	0.979969	1.2873	0.698912	0.00586395	1.11597	0	6.56713	2.93492	2.60512	2.45032	0	1.85797	0	0	0.984374	0	0
GABA.CGE.VIP.CALB2	4	2.81872	2.47326	0.00621548	0	0	0.00621548	0.139446	0	1.797	0	0	2.99997	0	0	0	0	0	0	0.884405	0	2.06553	0.00621548	5.15329	3.78988	0.00621548	1.34303	0	0.00621548	0	0	0	0	0
GABA.CGE.VIP.CALB2	4	3.62943	2.15983	0.417481	0	0	0	0	0	2.19748	0	0	1.78679	0	0	0	0.00637633	0	0	0	0	1.44077	0	5.96797	1.81842	0	2.94916	0	1.86309	0	0	0.00637633	0	0
GABA.CGE.VIP.CALB2	4	4.39743	1.84346	0.419636	0	0	0	0.374271	0	1.40594	0	0.14798	1.28798	0	0	0	0	0	0.42366	0.179229	0	1.68721	0.778301	6.19948	2.77055	0	3.16972	0	2.58816	0	0	1.78858	0	0
GABA.CGE.VIP.CALB2	4	3.80072	2.72068	0.355972	0	0	0	0.0114896	0	2.4965	0	0	2.40067	0.306184	0	0	0	0.0284803	0.114522	0.00576132	0	0.654651	0	5.95287	0	0	1.87986	0	2.3307	0	0	1.16178	0	0
GABA.CGE.VIP.CALB2	4	3.86082	2.3973	0.789876	0	0	0.0107806	0.68902	0	0.936081	0	0.301781	1.94194	0	0	0	0	0.975668	0	0.683564	0	1.11289	0	4.85431	1.81179	0	1.39229	0	0.00540484	0	0	0	0	0
GABA.CGE.VIP.CALB2	4	3.19944	2.30926	0.215221	0	0	0.00725048	0.167141	0	0.654488	0	0	1.3785	0	0	0	0	0	0	0	0	1.23057	1.64701	5.79817	0	0	1.20473	0	1.55302	0	0.215221	0	0	0
GABA.CGE.VIP.CALB2	4	3.74954	3.17257	0.489385	0	0	0.0175455	0.829479	0	2.40597	0	0	1.55742	0	0	0	0.00588278	0	0	0.0347885	0	1.02734	1.66682	5.80592	0	0	2.36025	0.35817	0.811297	0	0	0	0	0
GABA.CGE.VIP.CALB2	4	3.34022	2.43318	0.0605417	0	0	0.00691073	0.538987	0	2.25149	0	0	2.815	0	0	0	0	0	0.749754	0.0474012	0	1.33177	0	5.7652	0	0	1.91857	0	0	0	0	0.0670478	0	0
GABA.CGE.VIP.CALB2	4	3.36793	3.58008	0.511297	0	0	0.0145627	0	0	1.87082	0	0	1.30214	0	0	0.595615	0.00730788	0.717281	0	0.0145627	0	1.69601	0	5.40274	0	1.316	1.60597	0	2.31928	0	0	0.710095	0	0
GABA.CGE.VIP.CALB2	4	3.11825	1.90904	0.4475	0	0	0.00568478	0.776753	0	0	0	0	2.01402	0	0	0	0.0113374	0	0.832832	0	0	1.54512	1.03219	5.52281	3.44873	0	2.2264	0	0.00568478	0	0.0445983	1.75986	0	0
GABA.CGE.VIP.CALB2	4	3.60999	2.06777	0.436793	0	0	0	0	0	0.0687184	0	0	2.82849	0.597763	0	0.0753375	0.0211158	0.114158	0.512024	0	0	0.299037	2.00847	6.0789	2.51678	0.00708827	1.52283	0	2.56224	0	0	0.524731	0	0
GABA.CGE.VIP.CALB2	4	2.83083	2.89253	0.271404	0	0	0	1.27021	0	2.25535	0	0	1.5853	0	0	0	0	0	0.794637	0.303785	0	1.08909	0.547626	5.72477	2.80505	0.00954825	2.46915	0	0	0	0	0.978235	0	0
GABA.CGE.VIP.CALB2	4	3.41928	2.7533	0.405373	0	0	0.015744	0.696969	0	1.96254	0	0	2.04283	0	0	0	0.007903	0	0.415898	0.373118	0	0.986591	0	5.91276	2.63083	0	1.69873	0	0	0	0	0	0	0
GABA.CGE.VIP.CALB2	4	3.31478	2.35163	0.413642	0	0	0.0325181	1.10126	0	1.80666	0.0082292	0	2.54814	0	0	0	0	0	0	0.787619	0	1.04184	0	5.55966	0.456425	0	2.13065	0	0.285574	0	0	0.517351	0	0
GABA.CGE.VIP.CALB2	4	2.64111	1.96742	0.222945	0	0	0.0165131	0.249242	0	2.00287	0	0	2.25128	0	0	0	0	0	0.416177	0.0566407	0	1.33865	1.25443	5.59922	3.61781	0	1.72195	0	0	0	0	0	0.00829061	0
GABA.CGE.VIP.CALB2	4	3.42119	2.21438	0.266261	0	0	0.00675659	0	0	2.66082	0.00675659	0	1.50368	0	0	0	0	0	0	0.40206	0	1.15141	1.05471	5.63871	0.812795	0	1.35091	0	0	0	0	0	0.996367	0
GABA.CGE.VIP.CALB2	4	3.3239	1.91617	0.967467	0	0	0	0.238457	0	1.51113	0	0	0.758055	0	0	0	0	0	1.1763	0.434219	0	0.805446	1.54373	5.9619	2.98874	3.49049	2.47051	0	0	0	0	1.8565	0	0
GABA.CGE.VIP.CALB2	4	3.49832	2.04913	0.500769	0	0	0.0126644	0.531199	0	1.27203	0	0	1.76743	0	0.00635224	0	0	0	0	0.0126644	0	0.445183	0	4.53901	2.66155	0	1.0194	0	0	0	0	0	0	0
GABA.CGE.VIP.CALB2	4	3.20408	2.12454	0.32206	0	0	0.0114484	0.0171238	0	1.64917	0	0	1.62679	0.129422	0	0	0	0.362932	0	0.603781	0	1.81874	0	4.85236	3.70398	0	0.964509	0	0.00574058	0	0	0	0	0
GABA.CGE.VIP.CALB2	4	3.45878	2.39895	0.735009	0	0	0	0.702454	0	0.746949	0	0	1.60602	0	0	0	0	0	0	0	0	0.607045	0	4.94654	0	0	1.61437	0	1.99756	0	0	0.876635	0	0
GABA.CGE.VIP.CALB2	4	2.78859	1.58072	0.0301044	0	0	0	0.12212	0	1.15129	0	0.212573	2.25492	0	0	0	0.0076115	0.0076115	0	0.763643	0	1.06557	0	5.22464	3.33608	0	0.0076115	0	0	0	0	1.21449	0	0
GABA.CGE.VIP.CALB2	4	2.97696	0	0.285543	0	0	0	0.0624909	0	1.12743	0	0	0	0	0	0	0	0	0.00802829	0.267201	0	1.48379	0	5.33876	1.87634	0	2.4468	0	2.19679	0	0	0.156382	0	0
GABA.CGE.VIP.CALB2	4	3.88524	3.18607	0.150687	0	0	0.0781793	0.0527926	0	0.281613	0	0	2.1988	0	0	0.196261	0.0089946	0.54919	0.288408	0.232714	0	1.04809	0	5.7736	2.91097	0.0089946	2.92707	0	2.46401	0	0	0	0	0
GABA.CGE.VIP.CALB2	4	4.01504	2.66306	0.278676	0	0	0.0223023	0	0	0.410413	0	0	2.96019	0.376171	0	0	0.00562239	0	0.0167732	0.11693	0	1.52912	0	5.85077	2.79544	0	2.58584	0	2.79475	0	0	1.12326	0	0.00562239
GABA.CGE.VIP.CALB2	4	2.92267	0.908796	0.22559	0	0	0	0	0	0.969126	0	0	1.64095	0	0.00615326	0	0	0	0	1.46055	0	2.17635	0	5.05134	2.82693	0.00615326	1.44612	0	0	0	0	0	0	0
GABA.CGE.VIP.CALB2	4	3.59721	2.92257	0.23541	0	0	0.00880866	0.132397	0	1.74168	0	0	2.06588	0	0	0	0.00880866	0	0	0	0	2.01412	0	4.94847	0	0	1.57505	0	2.46759	0	0	1.41663	0	0
GABA.CGE.VIP.CALB2	4	3.47139	2.34172	0.82269	0	0	0.00794719	0.252499	0	0.0767652	0	0	0.981172	0	0	0	0	0	0	1.61845	0	1.73899	0	5.35331	0	0	2.32937	0	1.23127	0	0	0	0	0
GABA.CGE.VIP.CALB2	4	2.14807	2.4119	0.270347	0	0	0	0.544827	0	2.48533	0	0	1.64828	0	0	0	0	1.28343	0.00736374	0.00736374	0	1.59424	0	4.61416	2.52929	0	0.80392	0	0.0219305	0	0	0	0	0
GABA.CGE.VIP.CALB2	4	3.42947	2.79849	1.06627	0	0	0	0.0465143	0	0.581666	0	0	2.20464	0.526969	0	0.686259	0	0.0465143	0.00677884	0.949662	0	1.39129	0	5.86053	0	0.13945	1.68655	0	2.87233	0	0	0	0	0
GABA.CGE.VIP.CALB2	4	3.1074	2.81548	0.939482	0	0	0.00571399	0.233962	0	2.13139	0	0	2.44615	0	0	0	0	0	0.00571399	0	0	1.30029	0	5.48553	0.536823	0	1.62192	0	1.02938	0	0.265213	1.00451	0	0
GABA.CGE.VIP.CALB2	4	4.58106	2.27113	0.493584	0	0	0	0.12467	0	0	0	0	2.04881	0.143399	0	0.957874	0	0.291447	0.255609	0.294642	0	1.42264	0.917632	6.04888	1.5495	0	2.72288	0	3.27768	0	0.245609	1.28326	0	0
GABA.CGE.VIP.CALB2	4	3.87913	2.39092	0.780196	0	0	0	0.159415	0	2.03992	0	0	2.02237	0	0	0	0	0.0542514	0	0.561115	0	1.03583	0	5.96589	1.36926	0	2.78863	0	1.94333	0	0	0	0	0
GABA.CGE.VIP.CALB2	4	3.03599	1.69155	0.504038	0	0	0	0.41312	0	1.76122	0	0	0	0	0	0	0	0.00796082	0	0.380879	0	2.2114	0.449465	5.15029	1.60067	0	1.29131	0	0.00796082	0	0	0.301344	0.688678	0
GABA.CGE.VIP.CALB2	4	2.64022	2.20574	0.433099	0	0	0	0.345182	0	2.60643	0	0	1.67738	0.81858	0	0	0.00760522	0	0	0	0	1.33546	1.08844	5.56837	0	0.00760522	1.74494	0	1.00818	0	0	0.677802	0	0
GABA.CGE.VIP.CALB2	4	3.44478	2.41421	0.361403	0	0	0	0	0	1.92431	0	0	1.63399	0	0	0	0	0	0	0	0	0.148755	0	5.28	0	0	2.66432	0	2.27911	0	0	0	0	0
GABA.CGE.VIP.CALB2	4	2.96463	0.23355	0.147756	0	0	0.00689918	0.526091	0	1.42975	0	0	3.10499	0	0.0137511	0	0	0	1.29704	0.919973	0	1.87452	0.986674	6.04929	3.30437	0	1.24857	0	0	0	0	0	0	0
GABA.CGE.VIP.CALB2	4	3.44492	2.10058	0.0874503	0	0	0	0.00607405	0	2.24347	0	0	1.06711	0	0	0	0.00607405	0	0	0	0	1.49391	0	5.43242	1.6714	0	0.737434	0	0	0	0.11498	0	0.731588	0
GABA.CGE.VIP.CALB2	4	3.44088	2.14616	0.37034	0	0	0	0	0	0.831665	0	0	2.12692	0	0	0	0	0	0	1.45717	0	2.23718	0	5.44954	3.98216	0	1.63626	0	0	0	0	0	0	0
GABA.CGE.VIP.CALB2	4	3.19682	2.37825	0.40551	0	0	0.00692137	0.0927937	0	2.49939	0	0	1.37417	0	0	0	0	0.87381	0	0.0137952	0	1.46162	1.38292	5.45227	0	0	2.34619	0	2.90391	0	0	0	0	0
GABA.CGE.VIP.CALB2	4	2.92634	2.04707	0.296368	0	0	0.00731288	0.466569	0	2.63843	0	0	3.2589	0	0	0	0	0	0.0844112	1.22811	0	0.963964	0	5.59477	0	0	1.75915	0	0.192974	0	0	0	0	0
GABA.CGE.VIP.CALB2	4	2.80483	1.88753	0.450677	0	0	0	0.0395184	0	0.36	0	0	0.975576	0	0	0	0	1.14308	0.00502606	0.58	0	1.31397	0	5.58088	0	1.53644	2.33911	0	2.71991	0	0	0.50382	0	0
GABA.CGE.VIP.CALB2	4	2.56058	1.76829	0.243524	0	0	0	0	0	2.74767	0	0	2.77013	0	0	0.0975047	0	0	0.320745	0.832867	0	2.3708	0.0156336	5.03952	2.81312	0.00784733	0.44931	0	0	0	0	0	0	0
GABA.CGE.VIP.CALB2	4	3.33878	2.04487	0.32852	0	0	0.0154367	0.710251	0	0.55327	0	0	2.2207	0.137835	0	0	0	0.0306386	0	0.8459	0.00774811	1.54973	0	5.44619	0	0	2.13527	0	0	0	0	0.0381538	0	0
GABA.CGE.VIP.CALB2	4	3.11464	1.69321	0.411549	0	0	0.0313263	0	0	2.09141	0	0	1.16181	0	0	0	0	0	0	0.0269108	0	0.559669	0.528002	5.20181	0	1.16039	2.21237	0	2.15714	0.00453572	0	0	0	0
GABA.CGE.VIP.CALB2	4	3.63123	2.66651	0.401034	0	0	0.00622575	0.421728	0	2.43565	0	0	2.18957	0	0	0.27175	0	0.515502	0.720487	0.9478	0	0.983465	1.22139	5.6439	0.555708	0	2.67472	0	2.03322	0	0	0.938071	0.0427876	0
GABA.CGE.VIP.CALB2	4	3.36477	1.98502	0.575376	0	0	0.0279914	0	0	1.49076	0	0.40141	1.83646	0	0	0	0	0.0921371	0.00566131	0.0389721	0	0.745306	1.07122	5.55861	3.30284	0.00566131	2.06733	0	0.0712091	0.0112907	0	0.00566131	0	0
GABA.CGE.VIP.CALB2	4	3.00885	1.44407	0.603852	0	0	0.00603395	0.51027	0	1.58627	0	0	2.05369	0.327389	0	0	0	0	0.806788	0.884703	0	1.33716	0.671028	5.47594	3.90884	0	2.51788	0	0	0	0	0	0	0
GABA.CGE.VIP.CALB2	4	3.80727	1.838	0.344349	0	0	0	0.255553	0	1.45994	0	0	1.82566	0	0	0.526906	0	0	0.105559	0.929386	0	0.91577	0	5.82021	1.79199	0.0253675	2.41512	0	2.69208	0	0	0	0	0
GABA.CGE.VIP.CALB2	4	3.74439	2.26752	0.786796	0	0.00902243	0	0	0	0.96406	0	0	2.98737	0	0	0	0	0.0268267	0	0.586434	0	0.960598	0	5.71055	0	0.0179642	2.53521	0	1.03734	0	0	0	0	0
GABA.CGE.VIP.CALB2	4	3.60776	1.84621	0.625116	0	0	0	0.304008	0	1.55123	0	0	0.0698729	1.3664	0	0.249129	0	0	0	0.332719	0	0.81969	1.27142	4.50278	0	1.90175	2.84097	0	2.89224	0	0	0.201875	0.460934	0
GABA.CGE.VIP.CALB2	4	3.35646	1.91501	0.403718	0	0	0	0.813281	0	0.12594	0	0	0.419412	0	0	0	0	0	0	1.39418	0	1.74831	0	6.02954	0.450079	0	1.69467	0	0.928859	0	0	0	0	0
GABA.CGE.VIP.CALB2	4	3.42569	2.66216	0.61305	0	0	0.0154046	0.0230189	0	2.71338	0	0	1.87706	0	0	0	0	0	0.899855	0.851354	0	1.58852	0.0455198	5.66567	0	0	1.98824	0	2.52225	0	0	0.157656	0	0
GABA.CGE.VIP.CALB2	4	3.53813	2.06506	0.237842	0	0	0	0.639234	0	1.90364	0	0	2.08824	0	0	0	0	0	0.00594913	0.0118631	0	0.642378	1.30753	6.07773	2.56719	0	2.36709	0	2.08528	0	0	1.31396	0	0
GABA.CGE.VIP.CALB2	4	3.14703	2.25511	0.294511	0	0	0.0250517	0.397659	0	2.54368	0	0	1.47422	0	0	0	0	0.221013	0.510374	0.0188474	0	1.50566	1.3375	5.60366	0	0	2.02088	0	0	0.00632201	0	0	0	0
GABA.CGE.VIP.CALB2	4	3.77967	1.7399	0.389183	0	0	0.0121255	0.0534432	0	2.52312	0	0	1.93746	0	0	0	0.00608115	0	0.409638	0	0	0.758251	0.213406	5.9707	0	0	1.45005	0	0	0	0	0.104175	0.289292	0
GABA.CGE.VIP.CALB2	4	2.13085	2.90971	0.250428	0	0	0	0.374169	0	2.87387	0	0	1.49366	0	0	0.83283	0.0076618	0	0.469951	0	0	1.5669	0.539579	5.83508	0	0.0076618	1.7417	0	0.226187	0.0076618	0	0	0	0
GABA.CGE.VIP.CALB2	4	3.49341	2.31809	0.737553	0	0	0	0.522294	0	0.0163924	0	0	0.0640164	0	0	0.00822978	0	0	2.26632	0.729617	0	1.37584	1.48079	3.97518	0	4.55977	3.50167	0	1.12304	0	0	1.18556	0	0
GABA.CGE.VIP.CALB2	4	2.80525	0.360352	1.15347	0	0	0.019098	0.759688	0	0.598542	0	0	1.48888	0	0	0	0	0	0	0.019098	0	1.89454	0	4.59198	0.660187	0	2.71945	0	0	0	0	1.08093	0	0
GABA.CGE.VIP.CALB2	4	3.03426	0.882278	0.0500959	0	0	0.00731205	0.143335	0	2.16987	0	0	1.14048	0	0	0	0	0	0	0.944106	0	1.1263	0	5.10181	2.51925	0.00731205	1.83917	0	0	0	0	1.11914	0	0
GABA.CGE.VIP.CALB2	4	2.19489	0.905004	0.0609321	0	0	0.592095	0.470842	0	1.23584	0	0.266325	1.85257	0.561854	0	0.0776805	0	0.0265696	0	0.0177913	0	1.48401	0	5.4122	1.73942	0	2.00744	0	0.149759	0	0	0.465221	0	0
GABA.CGE.VIP.CALB2	4	3.69882	1.76259	0.757903	0	0	0.0175605	1.013	0	1.18946	0	0	0.698029	0	0	0	0	0	0	0	0	0.745371	1.17315	5.69707	0.303293	4.44565	2.51984	0	2.86029	0	0	0.576324	0	0
GABA.CGE.VIP.CALB2	4	4.09266	2.95631	0.532458	0	0	0.0354222	0.402651	0	0	0	0	0	0	0	0.754611	0	0.637853	0.384406	0.466837	0	1.7303	0	4.88597	0	4.54109	3.02558	0	2.47336	0	0	1.19896	0	0
GABA.CGE.VIP.CALB2	4	3.45241	2.6439	0.779378	0	0	0	0.0263199	0	2.07451	0	0	1.44464	1.05089	0	0	0	0	1.10753	0	0	0.788511	0.538482	4.99094	2.22074	0.00664519	1.40454	0	2.02296	0	0	1.32626	0	0
GABA.CGE.VIP.CALB2	4	2.78787	2.19998	0.546239	0	0	0.0151841	0.16856	0	1.66033	0	0	0.356554	0.81297	0	0.115469	0	0	0	0.0521652	0	0.86905	0.101744	5.16246	0	3.01179	1.93347	0	2.67851	0	0.0594001	0.122261	0	0
GABA.CGE.VIP.CALB2	4	3.77094	1.71563	0.629974	0	0	0.0232341	0.302022	0	0.942767	0	0	2.22808	0.172312	0	0	0	0	1.17101	0.784347	0	0.987533	0.740485	5.36192	0.886259	2.60482	2.26047	0	2.92685	0	0	0.363796	0	0
GABA.CGE.VIP.CALB2	4	3.45947	1.09351	0.937371	0	0	0	0.0884284	0	2.08813	0	0	2.39487	0.528568	0	0.036315	0	0	0.273343	0	0	0.602095	0.602095	5.23566	0	1.37589	1.90966	0	3.09271	0	0	0.180018	0	0
GABA.CGE.VIP.CALB2	4	2.7861	2.23528	0.88616	0	0	0.02705	0.686671	0	2.18568	0	0	1.18026	0	0	0	0	0	0.908515	0.908515	0	0.690115	0	5.44197	1.44834	0	1.1284	0	0	0	0.513883	1.47848	0	0
GABA.CGE.VIP.CALB2	4	1.86405	2.13297	0.418954	0	0	0	0	0	3.10868	0	0	1.86514	0	0	0	0	0	0.137736	0.119183	0	1.15464	0	4.44072	2.86964	0	2.07199	0	0.00700741	0	0	0	0	0
GABA.CGE.VIP.CALB2	4	3.23941	2.57548	0.592551	0	0	0.0172397	0.496767	0	2.6568	0	0	1.26133	0	0	0	0	0	1.33948	1.048	0	1.2004	0.727275	4.93078	0	0	1.94829	0	0	0	0	0.0172397	0	0
GABA.CGE.VIP.CALB2	4	3.30598	2.86834	0.711962	0	0	0.00875803	0.00875803	0	2.36471	0	0	1.46443	0	0	0	0	0	0.108275	0	0	1.70863	0	5.15419	0	0	1.84262	0	0	0	0	0	0	0
GABA.CGE.VIP.CALB2	4	3.57834	2.60059	0.735295	0	0	0.0146687	0.816877	0	2.09463	0	0	2.22573	0.956775	0	0	0	0	0	0	0	1.10672	0.206234	5.35898	0.590747	0.00736126	2.86337	0	2.22892	0	0	1.54947	0	0
GABA.CGE.VIP.CALB2	4	3.08307	2.85966	0.657039	0	0	0.00784266	0.502894	0	3.15139	0	0	1.84411	0	0	0	0	0	1.46386	0	0	1.08801	1.28481	5.01763	2.25743	0	1.9714	0	0	0	0	0	0	0
GABA.CGE.VIP.CALB2	4	3.27735	2.80446	0.579982	0	0	0	0.096178	0	2.50723	0	0	2.09133	0.790387	0	0	0	0	0.495784	0.201751	0	0.780524	0	5.35166	0.0071852	0	2.10108	0	2.59387	0	0	1.35883	0	0
GABA.CGE.VIP.CALB2	4	3.17438	2.20223	0.400215	0	0	0	0.692127	0	2.3854	0	0	1.21749	0.18653	0	0	0	0	0.58764	0	0	0.0913887	2.30485	4.9221	0.98892	0	2.23714	0	2.18393	0	0	0.418372	0	0
GABA.CGE.VIP.CALB2	4	2.65002	1.96839	1.04487	0	0	0.00587098	1.34805	0	1.52428	0	0	0.902668	0	0	0	0	0	1.59123	0	0	1.53829	0.645422	5.28489	3.41425	0.930917	2.57039	0	0	0	0	0.239694	0	0
GABA.CGE.VIP.CALB2	4	3.21745	3.06389	0.498034	0	0	0.0147297	0.965019	0	2.54163	0	0	1.94198	0	0	0.05766	0	0.320914	0.05766	0.170151	0	0.930511	0	5.02855	0.363074	0.0147297	2.42594	0	1.57605	0	0	0.451897	0.00739196	0
GABA.CGE.VIP.CALB2	4	3.19243	2.1062	0.779456	0	0	0	0.50917	0	1.72464	0	0	1.52121	0	0	0	0	0	0	0.115956	0	0.60089	0.587315	4.87156	0	0	1.75059	0	0.627498	0.0480075	0	0	0	0
GABA.CGE.VIP.CALB2	4	2.08035	1.85463	0.43637	0	0	0	0.0230132	0	0.939915	0	0	0	0	0	0	0	0	0	0	0	1.05976	0	4.52786	0	0	1.21971	0	2.12304	0	0	0.150969	0	0
GABA.CGE.VIP.CALB2	4	3.40097	2.24146	0.887028	0	0	0	0.115268	0	0.0374685	0	0	0.605576	0	0	0	0	0.685631	1.79455	0	0	0.745359	2.05848	5.04608	0.00760684	4.39747	3.5174	0.609735	2.19834	0	0	0.0592937	0	0
GABA.CGE.VIP.CALB2	4	2.35891	0.224814	0.441217	0	0	0	0.374154	0	1.12074	0	0	1.32787	0	0	0	0	0	0	0	0	1.67447	0	4.53922	0	0	2.0019	0	0.504063	0	0.0960698	1.79032	0	0
GABA.CGE.VIP.CALB2	4	2.83407	1.19091	1.09698	0	0	0.0159615	0.135236	0	1.24176	0	0	0.610864	0	0	0	0	0.18102	0	0	0	1.24794	0	5.02145	0	0.00534887	2.29715	0	2.26482	0	0	0.167503	0	0
GABA.CGE.VIP.CALB2	4	3.22441	1.08997	0.116347	0	0	0.0221858	0.592009	0	0.585784	0	0	0.323079	0	0	0	0	0	0.592009	0.116347	0	2.11381	0	4.98315	0	0	2.94931	0	3.02727	0	0	0.494307	0	0
GABA.CGE.VIP.CALB2	4	2.22657	0.0987039	0.0103205	0	0	0.0205356	1.02772	0	1.9498	0	0	1.03512	0	0	0.0306474	0	0	0	0.0797271	0	1.78834	2.22208	4.53155	0	2.01964	2.78616	0	0.761335	0	0	0	0	0
GABA.CGE.VIP.CALB2	4	2.81179	2.44802	0.546151	0	0	0	0.011841	0	0.784422	0	0	1.83495	0	0	0	0	0	0	0.06903	0	1.35649	0	4.22964	0.693426	0.011841	1.31579	0	0	0	0	1.2767	0	0
GABA.CGE.VIP.CALB2	4	1.94619	1.26432	0.439755	0	0	0.0121992	0.267618	0	0	0	0	0	0	0	0	0	0	0.639744	0.515852	0	2.59225	0	4.73582	3.21525	0	1.84092	0	0	0	0	1.57727	0	0
GABA.CGE.VIP.CALB2	4	2.00294	0.487184	0.909267	0	0	0	0	0	0.226148	0	0	0.588538	0	0	0	0	0.66694	0	0.101515	0	1.18902	0.543032	4.3172	0	0	1.04959	0	0.171414	0	0.0392857	0	0	0
GABA.CGE.VIP.CALB2	4	3.0291	1.29357	0.380703	0	0	0.0240924	0.302754	0	2.60158	0	0	0.623617	0	0	0	0	0	0.505849	0.0240924	0	1.93345	0	4.29906	0	0	2.77238	0	2.30847	0	0	0.093071	0	0
GABA.CGE.VIP.CALB2	4	2.57235	2.10532	0.731847	0	0	0	0	0	0.737934	0	0	0	0.483638	1.13775	0.0967139	0	0	0.836119	0.265924	0	2.2729	0.322659	4.67508	0	2.15948	2.87738	0	3.16528	0	0	0.0126133	0	0
GABA.CGE.VIP.CALB2	4	2.97622	1.72424	0.722134	0	0	0	0.0119602	0	1.57655	0	0	1.10572	0	0	0	0	0	0	0.0697055	0	0.290352	0	4.45945	0	1.82031	2.7068	0	2.86403	0	0	0	0	0
GABA.CGE.VIP.CALB2	4	3.42978	2.41847	0.346557	0	0	0	0.0917074	0	2.59404	0	0	1.03419	0	0	0	0	0	0	0.320759	0	1.22762	1.42201	5.16617	0	0	2.15727	0	2.25381	0	0	1.01262	0	0
GABA.CGE.VIP.CALB2	4	3.4614	0.883073	0.159863	0	0	0	0.940067	0	0.26192	0	0	1.90673	0.799289	0	0	0	0.00523929	1.25738	0	0	0.539071	1.15192	5.25588	3.17752	0	2.77897	0	0	0	0	0	0	0
GABA.CGE.VIP.CALB2	4	2.88785	2.90342	0.900095	0	0	0	0.306423	0	1.39816	0	0	0	0	0	0	0	0	0.784321	0.0376972	0	2.41302	0	4.59461	0	0	1.71076	0	0	0	0	0	0	0
GABA.CGE.VIP.CALB2	4	1.46091	1.67197	1.20424	0	0	0.0244006	1.43772	0	1.96025	0	0	0.575531	0	0	0	0	0	1.15099	0.82612	0	2.08746	0	4.39817	2.17957	0.0122747	0.417865	0	0	0	0	0.148898	0	0
GABA.CGE.VIP.CALB2	4	3.70289	2.42683	0.699155	0	0	0	0.893579	0	1.66857	0	0	1.68872	0.555132	0	0	0	0	0	0	0	0.482874	0	4.98955	2.84213	0	2.52115	0	1.6217	0	0	0.395943	0	0
GABA.CGE.VIP.CALB2	4	2.91888	0.0113128	0.785993	0	0	0	0	0	0.943916	0	0	2.70611	0	0	0	0	0	1.11444	0.0553259	0	1.77939	0	4.80723	2.68227	0	2.45619	0	0.157563	0	0	0.573032	0	0
GABA.CGE.VIP.CALB2	4	3.50314	1.72295	0.730846	0	0	0	0.888592	0	0.956672	0	0	2.10802	0.228706	0	0.339193	0	0	0.356476	0.321605	0	1.16014	0.147625	5.27251	0	2.95471	2.90102	0	3.16648	0	0	0.810109	0	0
GABA.CGE.VIP.CALB2	4	2.25335	1.87769	1.36141	0	0	0.0131627	0	0	1.55528	0	0	1.44289	0	0	0	0	0	0	0	0	2.06893	0	4.57301	0	0	2.14775	0	0.266006	0	0	0	0	0
GABA.CGE.VIP.CALB2	4	3.26882	2.14715	0.517189	0	0	0	0.542113	0	1.16881	0	0	2.73114	0	0	0	0	0	0	0.932506	0	2.60555	0	4.69093	3.28829	0	2.1322	0	0	0	0	0	0	0
GABA.CGE.VIP.CALB2	4	3.06641	1.92197	0.404891	0	0	0	0.278894	0	0	0	0	0.777374	0	0	0.311913	0	0.516774	0.725048	0.227228	0	1.515	0	3.2543	0	3.82454	2.61985	0	0.404891	0.0110309	0	0.574611	0	0
GABA.CGE.VIP.CALB2	4	2.96178	2.91312	1.00257	0	0	0	0.492026	0	2.18604	0	0	1.99143	0	0	0	0	0.0100388	1.36502	0	0	0.8423	0.897255	5.1505	0.510362	0.0199777	2.16079	0	1.80749	0	0	0.0395642	0	0
GABA.CGE.VIP.CALB2	4	3.11824	1.7133	0.413673	0	0	0	0.358269	0	1.43977	0	0	1.89514	0	0	0.553559	0	0	1.18856	0	0	1.74735	1.19386	5.09535	3.30899	0	1.63585	0	0	0	0	1.47768	0.586483	0
GABA.CGE.VIP.CALB2	4	3.26048	1.44973	0.359965	0	0	0	0	0	2.70523	0	0	1.8948	0.11671	0	0	0	0	0.718936	0.555472	0	1.80529	0	4.76541	3.66701	0	1.68656	0	0	0	0	0.206216	0	0
GABA.CGE.VIP.CALB2	4	3.12484	1.98004	0.351626	0	0	0	1.26551	0	2.622	0	0	0	0	0	0	0	0.240337	0.240337	0.158607	0	1.46863	1.05378	4.43378	0	0	2.34903	0	3.03198	0	0	0.555581	0	0
GABA.CGE.VIP.CALB2	4	3.17713	2.19277	0.999094	0	0	0	0.185169	0	0.892671	0	0	0	0.309411	0	0	0	0	1.17211	0.206978	0	1.4249	0.132353	4.82703	2.30295	4.33828	2.96326	0	0	0	0	0.719052	0	0
GABA.CGE.VIP.CALB2	4	3.37688	2.70791	0.249569	0	0	0.00565344	0.741877	0	1.71732	0	0	1.77372	0	0	0	0	0	0.512222	0.0816185	0	1.41817	0.948478	5.06488	2.74829	0	2.10899	0	0	0	0	2.15734	0	0
GABA.CGE.VIP.CALB2	4	2.78754	2.08074	0.529042	0	0	0	0.953139	0	2.65667	0	0	1.25712	0	0	0	0	0	0.923913	0.271017	0	0.87322	0	4.26081	2.81775	0	1.17214	0	0	0.222373	0	0.171242	0	0
GABA.CGE.VIP.CALB2	4	3.34881	1.79382	0.318728	0	0	0.0146134	0.682553	0	1.50649	0	0	0.345134	0	0	0	0	0	1.67709	0	0	1.01491	1.69211	5.15497	2.94848	2.54299	2.85174	0	0	0	0	1.07697	0	0
GABA.CGE.VIP.CALB2	4	3.35216	2.81646	0.419677	0	0	0	0.771625	0	2.0262	0	0	1.20995	0	0	0	0	0	0	0	0	0.0771704	0.515955	4.75449	0	0	2.45588	0	0	0	0	0	0	0
GABA.CGE.VIP.CALB2	4	3.18945	1.59002	0.56619	0	0	0.014679	0.800808	0	1.49021	0	0	1.30397	0	0	0	0	0	0.813999	0.014679	0	1.06985	1.08745	5.152	3.10959	0	2.41949	0	0	0	0	1.32777	0	0
GABA.CGE.VIP.CALB2	4	3.24503	1.7437	0.455382	0	0	0.00692508	0.924995	0	1.5184	0	0	0.891369	0	0	0	0	0	1.65214	0.442073	0	1.11741	0	5.29617	2.73788	0	2.17991	0	0	0	0	1.16405	0	0
GABA.CGE.VIP.CALB2	4	3.44789	3.10877	0.242445	0	0	0.00666945	0.0198764	0	1.36889	0	0	1.02965	0	0	0	0	0	0	0.520315	0	0.944901	0.585738	5.0466	0	1.0079	3.07936	0	2.02701	0	0.589457	0	0	0
GABA.CGE.VIP.CALB2	4	2.75727	1.57379	0.539779	0	0	0	1.16775	0	2.10707	0	0	0.0122629	0	0	0	0	0	1.47298	0.244994	0	1.52667	1.22372	5.3786	2.42284	0	2.71079	0	0	0	0	0	0	0
GABA.CGE.VIP.CALB2	4	3.91483	3.03272	0.128364	0	0	0.0151039	0.148243	0	1.83386	0	0	1.67899	0	0	0	0	0	0.205614	0.699147	0	1.33305	0	5.07134	0	0	2.29589	0	1.96261	0	0	0	0	0
GABA.CGE.VIP.CALB2	4	3.05453	2.10073	0.391687	0	0	0.0132308	0.641335	0	1.94211	0	0	1.30753	0	0	0	0	0	0.894079	0.0391786	0	0.734998	1.69777	5.29064	3.32182	2.4761	2.90441	0	0	0	0	0	0	0
GABA.CGE.VIP.CALB2	4	2.66563	2.40494	0.822797	0	0	0.00853301	0.702985	0	1.24851	0	0	1.91337	2.1469	0	0.0978835	0	0	2.03917	0	0	1.11171	0.715633	5.61665	2.70479	2.42334	3.16947	0	0.00853301	0	0	0.0337037	0	0
GABA.CGE.VIP.CALB2	4	2.83324	1.75394	0.494709	0	0	0	0.233384	0	1.34698	0	0	0	0.27764	0	0	0	0	0	0	0	1.46196	0	4.88305	0	0	2.47873	0	1.70322	0	0	0.294808	0	0
GABA.CGE.VIP.CALB2	4	3.1743	1.78858	0.316061	0	0	0	1.68844	0	2.21543	0	0	1.25711	0	0	0	0	0	0	0	0	1.61727	0	5.28975	1.10923	0	2.8286	0	0	0	0	0.800501	0	0
GABA.CGE.VIP.CALB2	4	2.3729	2.71213	0.596087	0	0	0	0.796311	0	2.89332	0	0	2.17467	0	0	0	0	0	1.49888	0.543576	0	0.947178	0	5.24304	2.8956	0	2.57742	0	0	0	0	0	0	0
GABA.CGE.VIP.CALB2	4	2.75743	2.04509	1.22501	0	0	0	0.586843	0	1.87962	0	0	2.7372	0.193508	0	0	0	0	0.252904	0.138475	0	1.63344	0.517381	5.46111	3.89239	0	2.15957	0	0.00923977	0	0	0	0	0
GABA.CGE.VIP.CALB2	4	2.93303	2.809	0.786992	0	0	0.00876134	0.241215	0	3.20565	0	0	1.31586	0	0	0	0	0	0.774901	0	0	1.44001	0.703484	5.28038	0	3.69592	2.80847	0	3.12741	0	0	0	0	0
GABA.CGE.VIP.CALB2	4	3.40616	2.50244	0.504542	0	0	0	0.934252	0	3.05376	0	0	1.67647	0.0812799	0	0	0	0	0.48301	0.452064	0	1.12315	0.52144	5.17405	1.50248	0	2.26632	0	0	0	0.100608	0.144305	0.357974	0
GABA.CGE.VIP.CALB2	4	3.39421	2.39459	0.390864	0	0	0	0.175048	0	2.05912	0	0	0.493279	0	0	0	0	0	0.586172	0	0	0.531478	0	4.8048	0	3.37476	2.37994	0	2.88025	0	0	0	0	0
GABA.CGE.VIP.CALB2	4	3.29839	2.06421	0.708462	0	0	0	0.801601	0	2.14397	0	0	0	0	0	0	0	0.305157	0	0	0	2.2455	0	4.28804	0	0	2.45493	0	2.6837	0	0	0.0196304	0	0
GABA.CGE.VIP.CALB2	4	2.62171	2.87658	0.356239	0	0	0	0.213295	0	2.73794	0	0	0.973955	0	0	0	0	0	0	0	0	1.45787	0.250992	4.65524	0.0157257	1.87179	2.92196	0	2.7451	0	0	0.0762662	0	0
GABA.CGE.VIP.CALB2	4	2.95374	2.92814	0.395236	0	0	0	0.793822	0	2.35835	0	0	1.8066	0	0	0	0	0	0.945999	0	0	1.24826	0.820848	5.07815	0	0	2.57862	0	0.897802	0	0	0.167018	0	0
GABA.CGE.VIP.CALB2	4	3.03819	1.29567	0.999507	0	0	0	0.780146	0	1.46895	0	0	1.05537	0	0	0	0	0	0	0.022053	0	2.22224	0.164144	4.4136	3.12415	0	1.65141	0	0	0	0	0.80038	0	0
GABA.CGE.VIP.CALB2	4	3.31108	1.39382	0.579258	0	0	0	1.30622	0	1.69205	0	0.0355771	1.58665	0	0	0	0	0	0.786264	0	0	1.5817	0.509218	4.6746	3.82826	0	1.90364	0	0	0	0	0	0	0
GABA.CGE.VIP.CALB2	4	3.46075	2.91647	0.4907	0	0	0	1.1391	0	2.93116	0	0	1.27981	0	0	0	0	0	1.19327	0	0	0.231775	2.11067	5.18148	0.241578	0	2.75958	0	2.08629	0	0.427939	0.625646	0	0
GABA.CGE.VIP.CALB2	4	2.92106	2.64535	0.614883	0	0	0	0.817793	0	2.99832	0	0	2.22668	0.452395	0	0	0	0.0340836	0	0	0	1.6138	0.258282	5.34759	0	0	2.53762	0	0	0	0.310455	0	0	0
GABA.CGE.VIP.CALB2	4	3.1335	2.46131	0.488947	0	0	0.0230869	0.805511	0	3.08876	0	0	1.75979	0.282903	0	0	0	0	0	1.12449	0	1.72295	0	4.20159	1.97258	0	0.784417	0	0	0	0	0	0.995084	0
GABA.CGE.VIP.CALB2	4	3.06329	1.69583	0.0972093	0	0	0	0.342429	0	1.48384	0	0	0	0	0	0	0	0	1.01377	0	0	1.41186	1.55099	5.20539	2.0382	3.81122	2.83248	0	0	0	0	0.713601	0	0
GABA.CGE.VIP.CALB2	4	2.74906	2.82869	0.493309	0	0	0	0.230379	0	2.91224	0	0	2.44084	0	0	0	0	0	0	0.363557	0	1.83438	0	4.97375	2.32699	0	1.23874	0	0	0	0	0	0	0
GABA.CGE.VIP.CALB2	4	2.98182	3.08149	0.455156	0	0	0	0.951705	0	1.77992	0	0	2.12989	0.649363	0	0	0	0	0	0.880138	0	0.562644	0	4.81333	0	1.60847	2.93436	0	1.35124	0	0	0	0	0
GABA.CGE.VIP.CALB2	4	2.31828	1.68309	0.0712564	0	0	0	1.40545	0	1.06321	0	0	0.277666	0	0	0	0	0	0	0.757279	0	0.673013	0.0712564	3.84569	1.61201	0	1.77063	0	0	0	0	1.31713	0	0
GABA.CGE.VIP.CALB2	4	3.10028	1.26437	0.751036	0	0	0	0.394725	0	1.55832	0	0	0	0	0	0	0	0	0	0.114216	0	0.309675	0.896874	4.58596	0	0	2.26707	0	2.57257	0	0	0	0	0
GABA.CGE.VIP.CALB2	4	3.46541	1.84309	0.330374	0	0	0	0	0	0.813985	0	0	1.5047	1.65719	0	0.442328	0	0	0	0.134734	0	1.22693	0.170116	4.70775	2.79929	0	2.59709	0	2.02457	0	0	0.45548	0	0
GABA.CGE.VIP.CALB2	4	3.17033	2.70245	0.889301	0	0	0	0.417148	0	1.36269	0	0	2.09523	0	0	0.0197132	0	1.17241	0	0	0	1.69005	1.26085	5.45775	1.51813	0	1.70101	0	2.98537	0	0	1.33688	0	0
GABA.CGE.VIP.CALB2	4	2.31412	0.237534	0.869314	0	0	0	0.850402	0	0.539401	0	0	1.8219	0.512999	0	0	0	0	0.728741	0.105904	0	1.44976	0	4.7817	2.27355	0	1.99408	0	0	0	0	1.07972	0	0
GABA.CGE.VIP.CALB2	4	3.20373	2.21089	0.894608	0	0	0	0.377079	0	1.95654	0	0	1.57545	1.24788	0	0.471663	0	0	1.44226	0	0	0.790869	0.598624	4.94196	2.47418	0	1.93588	0	2.76161	0	0	0.823136	0	0
GABA.CGE.VIP.CALB2	4	3.27123	1.64471	0.795467	0	0	0	0.481438	0	0.569661	0	0.0519379	2.10894	0.434224	0	0	0	0	0.14836	0.520205	0	1.39063	1.73706	4.98626	2.99838	0	2.77335	0	0	0	0	0.766166	0	0
GABA.CGE.VIP.CALB2	4	3.28168	1.21324	0.0865817	0	0	0	0.327577	0	1.85437	0	0	1.6001	0	0	0.299246	0	0	0	0.166261	0	1.0555	0.630508	5.55123	1.75	2.06514	2.42913	0	0.783283	0	0	0.722437	0.559252	0
GABA.CGE.VIP.CALB2	4	2.71022	2.15985	0.18761	0	0	0	0.556868	0	2.74544	0	0	1.77805	0	0	0	0	0	0	0.589186	0	1.71818	0	4.26481	3.11385	0	1.47752	0	0	0	0	0.790174	0	0
GABA.CGE.VIP.CALB2	4	2.72989	1.18948	0.123043	0	0	0	0.756491	0	1.12591	0	0	1.81323	0	0	0	0.405416	0	1.68496	0.068983	0	1.444	1.24925	5.37486	3.35767	2.21284	2.12013	0	0	0	0	0.882303	0	0
GABA.CGE.VIP.CALB2	4	3.62566	1.42109	0.669052	0	0	0	0.458264	0	1.5706	0	0.269429	1.90975	0	0	0	0	0	0.230907	0.754029	0	0.934555	2.10546	5.24607	0	0	2.49888	0	2.40518	0	0.230907	0.810589	0.127562	0
GABA.CGE.VIP.CALB2	4	2.46345	2.41714	0.926293	0	0	0	1.13231	0	2.17595	0	0	1.15441	0.592653	0	0	0	0	0	1.32786	0	0.724146	0	5.06695	0	0.0228451	2.56974	0	1.21791	0	0	0	0	0
GABA.CGE.VIP.CALB2	4	3.19899	2.75796	0.40485	0	0	0.0127157	0.772196	0	2.9332	0	0	1.46787	0	0	0	0	0.0252717	0	0.0739762	0	1.62826	0	5.0978	0	2.31997	3.04946	0	2.90137	0	0	0.795569	0	0
GABA.CGE.VIP.CALB2	4	2.4592	1.74982	0.878705	0	0	0	0.799735	0	1.21692	0	0	1.86098	0	0	0	0	0	1.39045	0.731737	0	1.60289	0	5.41805	2.99278	0	1.01347	0	0	0	0	0.0874743	0	0
GABA.CGE.VIP.CALB2	4	2.76594	0.690162	0.989492	0	0	0	0	0	2.15612	0	0	0.0795841	0	0	0	0	0	0	0.310774	0	1.0317	2.02951	4.83444	0	2.23004	3.17786	0	2.96218	0	0	0	0	0
GABA.CGE.VIP.CALB2	4	3.76787	3.00282	0.662428	0	0	0	0.468666	0	1.85161	0	0	1.47803	0	0	0	0	0.261541	0	0.0917445	0	1.16958	0	5.26842	0.392328	3.22695	2.99109	0	3.04129	0	0.694922	1.46825	0.48194	0
GABA.CGE.VIP.CALB2	4	2.90558	1.47743	0.348245	0	0	0	0.238664	0	1.33974	0	0	1.82374	0	0	0	0	0	0.810814	0	0	1.30047	0.67074	5.04303	2.37745	0	2.41318	0	0	0	0	0	0	0
GABA.CGE.VIP.CALB2	4	3.50465	2.28343	1.12266	0	0	0	0.44006	0	0.631818	0	0	2.18739	0	0	0	0	0.472891	1.5358	0.658997	0	2.07683	1.56512	5.6817	1.90993	4.18896	2.39495	0	2.29568	0	0	0.711234	0	0
GABA.CGE.VIP.CALB2	4	2.1626	2.63107	0.780997	0	0	0	0.267636	0	0	0	0	1.11855	0	0	0	0	0	0	0	0	1.48601	0.300631	4.60088	0.569384	0.0216826	1.56237	0	2.57425	0	0	0	0	0
GABA.CGE.VIP.CALB2	4	3.92069	2.45118	0.643984	0	0	0	0	0	0.848239	0	0	0.979933	0.203767	0	0	0	0.134379	1.78022	0.0598148	0	0.932556	0.505306	4.85298	0	4.58098	3.33945	0	2.6082	0	0	0.44132	0	0
GABA.CGE.VIP.CALB2	4	3.66216	1.68415	0.891561	0	0	0	0	0	0	0	0	1.01476	0.472498	0	0.975355	0	0.0349126	1.0711	0	0	1.35986	1.40445	4.87805	1.79336	2.99347	3.06642	0	1.59452	0	0	2.04317	0	0
GABA.CGE.VIP.CALB2	4	3.0039	0.0307099	0.0605047	0	0	0	0.394329	0	1.95966	0	0	1.60468	1.57284	0	0	0	0	0.425377	0.0750757	0	0.816712	0.558742	4.9112	3.26451	0	2.21603	0	0	0	0	0.317898	0	0
GABA.CGE.VIP.CALB2	4	3.36571	0	0.583381	0	0	0	0.883419	0	0.966292	0	0	0.788063	0	0	0	0	0	0	0.731463	0	0.817637	0.60764	4.89145	2.26092	0	2.01072	0	0	0	0	1.34503	0	0
GABA.CGE.VIP.CALB2	4	1.81845	1.0604	0	0	0	0	0.646923	0	1.31613	0	0	0	0	0	0	0	0	0	0	0	2.01847	0	4.52092	0	0	2.6995	0	1.5096	0	0	0	0	0
GABA.CGE.VIP.CALB2	4	2.93533	1.40232	0.464455	0	0	0	0.434686	0	1.31437	0	0	0.502818	0	0	0	0	0.0154367	0	1.16111	0	1.74828	0	4.50014	0	0	0.317257	0	0	0	0	0	0	0
GABA.CGE.VIP.CALB2	4	2.55434	1.25089	0.826148	0	0	0	0.173026	0	0	0	0	2.06859	0.460951	0	0	0	0	0.604943	0	0	2.01212	1.01405	5.4784	3.17127	3.32724	2.98258	0	0	0	0	0	0	0
GABA.CGE.VIP.CALB2	4	2.91513	1.78546	0.123348	0	0	0	0.176086	0	1.5311	0	0	2.01292	0	0	0	0	0	0.115581	0.642612	0	0.730673	0.240046	5.56452	2.72789	0	1.58095	0	0	0	0	0.494016	0	0
GABA.CGE.VIP.CALB2	4	3.19335	2.24162	0.0247659	0	0	0.00832363	0.63001	0	1.20857	0	0	2.27051	0	0	0.450036	0.0165785	0	0.602937	1.48203	0	1.84704	0	5.62971	3.07478	0	1.21107	0	0	0	0	2.18684	0	0
GABA.CGE.VIP.CALB2	4	3.69232	2.53138	1.03439	0	0	0.00828395	0.00828395	0	1.94793	0	0	2.24352	0	0	0	0.00828395	0	0	0	0	1.22983	0	5.8854	3.53486	0	0.764506	0	0	0	0	1.07779	0.202611	0
GABA.CGE.VIP.CALB2	4	3.23173	2.6106	0.626162	0	0	0.0137216	0.159311	0	2.27611	0	0	2.00292	0.147459	0	0	0	0	0.861961	0.135466	0	0.0339573	1.22901	6.46796	2.45134	0	1.75447	0	0	0	0	1.17502	0	0
GABA.CGE.VIP.CALB2	4	1.30382	2.6559	0	0	0	0.0498477	0.0973282	0	2.60622	0	0	1.92829	0	0	0	0.0252344	0	0	0.0498477	0	0	0.9883	6.10283	2.55196	0	1.22443	0	0	0	0	0	0	0
GABA.CGE.VIP.CALB2	4	3.39755	2.18209	0.481898	0	0	0.00833202	1.1633	0	1.41808	0	0	1.26276	0	0	0	0	0.715815	1.24364	0.331633	0	0.97074	1.21674	6.17509	3.12473	1.70195	2.09949	0	1.60763	0	0	0.38427	0	0
GABA.CGE.VIP.CALB2	4	2.47888	1.73421	0.645194	0	0	0.00734174	0.280828	0	0.0779386	0	0	1.40794	0	0	0	0	0.00734174	0	0.376285	0	1.16647	1.2352	4.86961	2.49116	0.00734174	2.03619	0	1.87475	0	0	0.258318	0	0
GABA.CGE.VIP.CALB2	4	3.99311	2.13568	0.912362	0	0	0	0	0	2.31081	0	0.00587283	1.5672	0.121848	0	0	0	0	0	0.106081	0	0.895666	0.987521	5.27482	3.17883	0	1.63145	0	2.97678	0	0	0.828523	0.22576	0
GABA.CGE.VIP.CALB2	4	3.16791	0.546801	0.162473	0	0	0	0.149897	0	1.54073	0	0	1.81811	0	0	0.476301	0	0	0	1.15556	0	1.65377	0.0073238	5.55737	2.46857	0	1.14158	0	0.77076	0	0	0	0	0
GABA.CGE.VIP.CALB2	4	2.97012	2.02492	0.387094	0	0	0	0.458961	0	2.36933	0	0	2.33724	0	0	0	0	0	0	0.141446	0	1.66544	0	5.37266	0	0	2.40881	0	1.77424	0	0	0.198413	0	0
GABA.CGE.VIP.CALB2	4	3.49875	2.33378	0.161496	0	0	0.00918233	0.509328	0	0	0	0	0.327456	0	0	0.568515	0	0.0182811	1.99924	0	0	1.08058	1.64989	4.85163	0	4.07526	3.40557	0	1.86721	0	0	0.718623	0	0
GABA.CGE.VIP.CALB2	4	3.07541	1.44506	0.169223	0	0.00765332	0	0	0	2.39536	0	0	1.99727	0	0	0	0	0	0	0.595735	0	0.507246	0	5.37032	3.26807	0	0.430345	0	0	0.00765332	0	0	0	0
GABA.CGE.VIP.CALB2	4	2.24863	2.09171	0.444309	0	0	0.00640944	1.44322	0	1.83619	0	0	1.4417	0	0	0	0	0	0	0	0.00640944	1.29977	0.982755	5.89565	2.8979	0	2.20777	0	0	0	0	0.857277	0	0
GABA.CGE.VIP.CALB2	4	3.50955	2.28223	0.391083	0	0	0	0.46312	0	1.8123	0	0	0.667727	0	0	0	0	0	0	0.744039	0	1.34792	0.425347	5.50896	0	0	2.62067	0	3.06384	0	0.593276	0.30263	0	0
GABA.CGE.VIP.CALB2	4	3.83225	1.0895	0.3969	0	0	0	0.454296	0	1.11339	0	0	2.01082	0	0	0.246505	0	0	0.469394	0.271166	0	1.69685	0.0768407	5.99136	2.34876	0	2.81985	0	3.20961	0	0	0.380657	0	0
GABA.CGE.VIP.CALB2	4	2.69866	1.26788	0.283636	0	0	0	0.015496	0	2.09062	0	0	1.34605	0	0	0	0	0	0.007778	1.05298	0	2.15147	0	5.1169	0	0	1.45929	0	1.38784	0	0	0	0	0
GABA.CGE.VIP.CALB2	4	3.34719	1.80275	0.667206	0	0	0	0	0	2.63887	0	0	1.48139	0	0	0.0361834	0	0.902041	0	0.643288	0	1.47929	0.753209	5.55781	2.02997	0.0182554	2.98245	0	3.52786	0	0	0	0	0
GABA.CGE.VIP.CALB2	4	2.58507	2.28442	0.389849	0	0	0	0.123561	0	1.12748	0	0	0.599933	0	0	0	0	0	0	0.0789956	0	1.28934	0	5.61995	0	0	1.36979	0	1.04425	0	0	0	0	0
GABA.CGE.VIP.CALB2	4	2.38852	1.46823	0.300153	0	0	0	0.110368	0	1.85123	0	0	1.59862	0	0	0	0	0	0	0.081455	0	0.119822	0.0716287	5.79603	3.26634	0	0.83499	0	0	0	0	0	0	0
GABA.CGE.VIP.CALB2	4	3.07697	2.31304	0.696567	0	0	0	0	0	2.3827	0	0	2.83353	0.0990821	0	0	0.0086423	0	0	0.930712	0	0.610817	0	5.67362	0	0	1.9999	0	2.11622	0	0	0.271912	0	0
GABA.CGE.VIP.CALB2	4	2.51215	1.76217	0.478085	0	0	0	1.1062	0	1.52586	0	0	2.33213	0.444969	0	0	0	0.14637	0.561382	0.0919645	0	1.1922	0.800191	5.97804	4.29093	0	2.33383	0	0	0	0.161386	0	0	0
GABA.CGE.VIP.CALB2	4	3.43232	2.29559	0.51885	0	0	0.00806376	0.422823	0	2.36183	0	0	1.82812	0.76908	0	0	0	0.121812	0.016063	0.016063	0	0.798655	0	5.82793	0.243163	0	1.80041	0	2.21585	0	0.157024	0.016063	0	0
GABA.CGE.VIP.CALB2	4	3.75521	2.51428	0.381383	0	0	0	0	0.745359	0.706476	0	0	2.70093	0.872517	0	0.0772954	0	1.49815	0	0.679688	0	1.07149	0	4.86187	0	2.60207	2.44239	0	2.21204	0	0.381383	0.00888939	0	0
GABA.CGE.VIP.CALB2	4	3.5929	2.29439	0.0364863	0	0	0	0.528716	0	2.54859	0	0	2.59542	0.478184	0	0	0	0	1.10699	0	0	0.394122	0.122271	5.73395	3.15464	0	1.70746	0	2.84879	0	0	0.97242	0	0
GABA.CGE.VIP.CALB2	4	2.87683	1.20605	0.747455	0	0	0	0.526926	0	0.887573	0	0	2.66825	1.61181	0	0	0.00832331	0.838205	0.598336	0.00832331	0.366708	0.743489	1.02854	5.86545	3.66538	0	2.82118	0	0	0	0	0	0	0
GABA.CGE.VIP.CALB2	4	2.63107	2.312	0.271812	0	0	0	0.49095	0	2.14823	0	0	1.71992	0	0	0	0	0	0	0.00914455	0	1.73947	0.968957	5.91227	1.19846	0	1.39642	0	0	0	0	0.0536535	0	0
GABA.CGE.VIP.CALB2	4	3.34543	1.92827	0.319068	0	0	0	0.656284	0	2.33526	0	0	1.83702	0	0	0	0	0	2.13735	0.716652	0	0.664547	1.10366	6.41896	2.00651	0	2.56025	0	0	0	0	0.574183	0	0
GABA.CGE.VIP.CALB2	4	3.24069	2.38695	0.436528	0	0	0	0.507453	0	2.60765	0	0	2.26996	0	0	0	0	0	0	0	0	0.789035	1.0341	5.9402	1.52997	0	0.769471	0	0	0	0.216462	0.511723	0	0
GABA.CGE.VIP.CALB2	4	3.00016	2.16114	0.225606	0	0	0	0.0731803	0	2.00615	0	0	2.40162	0	0	0	0.371026	0	0	0.650981	0	1.51362	0	5.01018	2.93308	0	1.01024	0	0	0	0	0.617427	0.450715	0
GABA.CGE.VIP.CALB2	4	2.33268	1.94061	0.949307	0	0	0.0115792	0.341905	0	1.6495	0	0	0.282243	0	0	0.0455333	0	0	0	0.0343429	0	1.07215	0.834822	3.74089	0	0	2.85302	0	2.42749	0	0	0.0115792	0	0
GABA.CGE.VIP.CALB2	4	2.04648	1.53093	0.488884	0	0	0.0338126	0	0	1.95179	0	0	0.800476	0	0	0.197052	0	0	0	0.921553	0	2.37328	0	3.97351	2.01641	0	0.889103	0	0	0	0	0	0	0
GABA.CGE.VIP.CALB2	4	3.46658	2.35557	0.405381	0	0	0	1.1439	0	1.98319	0	0	0.614442	0	0	0	0	0	1.32929	0	0	1.93232	0	4.9328	0	0	3.2242	0	1.07094	0	0	0.966032	0	0
GABA.CGE.VIP.CALB2	4	1.9957	0.935149	0.872013	0	0	0	0.245566	0	1.27621	0	0	1.05448	0	0	0	0	0	0.716167	1.49073	0	1.67979	0	4.588	2.81399	0	2.03865	0	0	0	0	0.92637	0	0
GABA.CGE.VIP.CALB2	4	2.91286	1.69143	0.42002	0	0	0.00962008	0.0744877	0	0.550808	0.413648	0.00962008	1.18233	0	0	0.00962008	0	0	0.818154	0.00962008	0	1.54805	1.03921	5.58367	1.52517	0	2.16381	0	2.66371	0	0	0.81388	0	0
GABA.CGE.VIP.CALB2	4	2.7671	0.38037	0.302326	0	0	0.00781389	0.145735	0	2.03396	0	0	0.0459929	0	0	0	0	0	0	0.547855	0	1.86316	0	4.88164	0	0	2.65506	0	2.17713	0	0	0	0	0
GABA.CGE.VIP.CALB2	4	3.05541	1.23244	0.748769	0	0	0	0.148966	0	1.45932	0	0	0.589545	0	0	0	0	0	0.852416	1.01412	0	1.43332	1.26979	5.10884	0	0	3.0866	0	2.35876	0	0	1.16587	0	0
GABA.CGE.VIP.CALB2	4	2.59087	2.21827	1.15568	0	0	0.00720387	0.303258	0	0.531392	0	0.355268	1.63618	1.47125	0	0	0	0.612965	0	0.677426	0	0.71349	1.45451	5.1071	1.80305	0	2.18712	0	1.5151	0	0	0.920699	0	0
GABA.CGE.VIP.CALB2	4	3.19246	2.58818	0.546089	0	0	0	0.377234	0	1.19465	0	0	1.22466	0	0	0	0	0	0	0.571654	0	1.50618	0	4.7052	2.27281	0	2.06068	0	0	0	0	0	0	0
GABA.CGE.VIP.CALB2	4	2.37854	1.20168	0.504058	0	0	0.0105159	0.941789	0	0.0105159	0	0	2.26229	1.78118	0	0	0	0.147187	0.618576	0.100491	0	0.352666	0.0713897	4.94257	3.24258	0	2.66018	0	0	0	0	0.299257	0	0
GABA.CGE.VIP.CALB2	4	2.35216	0.908714	0.450862	0	0	0	0.483322	0	0.13541	0	0	1.72439	0	0	0.079606	0	0	0.270581	0.107897	0	0.685098	0.0103043	4.95741	2.8254	0	1.46914	0	0	0	0	0	0	0
GABA.CGE.VIP.CALB2	4	2.65892	1.88369	0.808309	0	0	0	0.483694	0	3.02352	0	0	2.01497	0	0	0	0.0205231	0	0	1.96973	0	1.13622	0.0603474	4.65541	1.98977	0	1.83856	0	0	0	0	0.19698	0	0
GABA.CGE.VIP.CALB2	4	3.18504	1.14831	0.611296	0	0	0	0.544487	0	0.59627	0	0	2.49196	1.03782	0	0	0	0.669239	0.51208	0.601304	0	0.213649	1.53996	4.94609	3.53623	0	2.46818	0	0	0	0	0	0.0447872	0
GABA.CGE.VIP.CALB2	4	3.09306	2.24119	0.691718	0	0	0	0.0094518	0	0.0820126	0	0	0.931554	0	0	0	0	0	2.10626	0.279815	0	1.70154	0	5.17023	1.55438	3.71888	2.68356	0	1.17594	0	0	2.1051	0	0
GABA.CGE.VIP.CALB2	4	2.74862	2.22524	0.814321	0	0	0.00768598	0.508948	0	2.59977	0	0	1.5694	0.239053	0	0.280699	0	0	0.905706	0	0	1.6241	1.24608	5.42	2.67484	2.03985	1.87673	0	3.15234	0	0	0.0671354	0	0
GABA.CGE.VIP.CALB2	4	2.38229	0	0.486039	0	0	0	0.915155	0	0.73233	0	0	1.95303	1.03975	0	0	0	0	2.05552	0	0	1.6362	0.558805	4.48713	3.29644	0.761403	2.43741	0	0	0	0	1.16975	0	0
GABA.CGE.VIP.CALB2	4	3.1367	2.68838	0.841494	0	0	0	1.08056	0	2.07841	0	0	1.43094	0	0	0	0	0	2.07317	0.132787	0	0.132787	1.05762	5.60654	2.37786	0	2.56717	0	2.94584	0	0	1.03414	0	0
GABA.CGE.VIP.CALB2	4	2.52534	2.8588	0.751455	0	0	0.0280787	0.575693	0	2.49839	0	0	0	0.00944746	0	0	0	0	0	1.48979	0	1.68016	0.520839	4.43274	0	2.82953	2.63393	0	3.10376	0	0.0188065	0.124773	0	0
GABA.CGE.VIP.CALB2	4	2.72631	1.91346	1.25569	0	0	0.0191987	0.517868	0	0.973674	0	0.00964542	0	0	0	0	0	0	1.36788	0	0	1.61387	1.12616	5.04809	1.85909	3.95477	3.19405	0	0	0	0	1.47319	0	0
GABA.CGE.VIP.CALB2	4	3.53375	2.994	0.549346	0	0	0.00694837	0.212743	0	2.60849	0	0	1.90056	0	0	0	0	0	0.218364	0	0	1.28115	0.634202	5.30282	0	0	1.91504	0	0	0	0	0.304245	0.0342689	0
GABA.CGE.VIP.CALB2	4	2.54872	1.88953	0.584228	0	0	0.00868313	1.18401	0	1.65767	0.00868313	0	1.9838	0	0	0	0	0	1.17866	0.00868313	0	1.18134	1.18667	5.48772	2.45889	0.115196	2.57363	0	0	0	0	0.793992	0.00868313	0
GABA.CGE.VIP.CALB2	4	2.31982	2.52167	0.373989	0	0	0	0.562963	0	2.61961	0	0	1.21522	0.540046	0	0	0	0	2.57881	0.373989	0	0.865619	1.20812	5.47157	1.73807	0.422079	2.72511	0	0	0	0	0	0	0
GABA.CGE.VIP.CALB2	4	2.76055	2.45204	0.879047	0	0	0	0.402992	0	2.15911	0	0	1.38621	0	0	0	0	0	2.04027	0.526711	0	0.422315	1.32021	5.74336	2.30831	3.18944	3.41726	0	1.78679	0	0	0.316431	0	0
GABA.CGE.VIP.CALB2	4	3.10347	2.45605	0.322129	0	0	0.00841037	0.309814	0	2.59954	0	0	1.16451	0	0	0.00841037	0	0.704061	1.95143	0.0732621	0	1.06773	0.415545	5.38096	0	0.0250218	2.63227	0	2.05073	0	0	0.674385	0.0250218	0
GABA.CGE.VIP.CALB2	4	2.6757	1.93995	0.448232	0	0	0.0100483	1.01055	0	1.87241	0	0	0	0.479977	0	0	0	0	2.01271	0	0	1.55958	1.03596	5.62524	3.01257	3.53061	2.8348	0	0	0	0	0	0	0
GABA.CGE.VIP.CALB2	4	2.70202	2.55716	0.252508	0	0	0	0.00866686	0	2.66515	0	0	1.64277	0	0	0	0	0	0	1.74054	0	1.41494	0.925565	5.26851	3.141	0	1.23468	0	0	0	0	0	0	0
GABA.CGE.VIP.CALB2	4	3.62308	0.0318189	0.43278	0	0	0	0.384441	0	1.57843	0	0	1.62565	0	0	0	0	0	0	0.0702196	0	1.13967	0	6.14641	2.1655	0.00805015	2.08944	0	1.93741	0	0	0.596827	0	0
GABA.CGE.VIP.CALB2	4	4.00388	2.17777	0.473451	0	0	0	0.026752	0	0.88332	0	0	1.41097	0	0	0	0	0	0.676526	0.916394	0	1.15912	1.80784	6.14562	1.37278	4.14225	2.81261	0	3.53815	0	0	0.0089971	0	0
GABA.CGE.VIP.CALB2	4	3.25793	0.528479	0.499421	0	0	0.00806448	0.268262	0	0.484569	0	0	2.81785	0.268262	0	0.157037	0	0.64121	1.63974	0.114628	0	1.39936	1.51079	6.01359	3.73891	0	2.50395	0	0	0	0	0.464418	0	0
GABA.CGE.VIP.CALB2	4	3.45978	2.07366	0.873655	0	0	0.00808151	0	0	1.85186	0	0	1.57986	0	0	0.796217	0	0.0397699	0.211325	0.274943	0	0.825075	0.00808151	5.00658	0	2.66474	2.55688	0	2.69643	0	0.3463	1.03876	0	0
GABA.CGE.VIP.CALB2	4	3.19318	2.80212	0.295089	0	0	0	1.09331	0	2.77326	0	0	1.77169	0	0	0	0.0248054	0	0	0.0248054	0	1.13722	0.3614	6.25509	2.92663	0	1.88719	0	0	0	0	0.133063	0.0490103	0
GABA.CGE.VIP.CALB2	4	3.28566	1.3333	0.709218	0	0	0	0.101	0	2.18632	0	0	1.95842	0	0	0.147916	0	0	0.731381	0	0	1.54367	1.26713	6.02927	2.31121	2.84268	2.78627	0	3.79047	0.00756252	0	0.0225181	0	0
GABA.CGE.VIP.CALB2	4	3.58878	1.92041	0.420686	0	0	0	0.382855	0	1.68567	0	0	1.71535	0	0	0	0	0.353511	0.0347282	1.37301	0	1.79593	0.749853	5.71088	0	0.00704279	2.1515	0	0	0	0	0	0	0
GABA.CGE.VIP.CALB2	4	2.98305	2.56697	0.304701	0	0	0	0.443121	0	1.37382	0	0.462813	2.25889	0.321686	0	0	0	0.0379887	0.00771408	0.515049	0	0.321686	0	5.31359	3.61242	0	1.19859	0	0	0	0	0	0	0
GABA.CGE.VIP.CALB2	4	2.62552	1.3627	0.621105	0	0	0	0.543002	0	1.73699	0	0	1.45957	0	0	0	0.00733189	0	0.274924	0.65225	0	1.38506	0	5.2496	2.74443	0	1.62613	0	0	0	0	0.0913614	0	0
GABA.CGE.VIP.CALB2	4	2.3642	1.21738	0.180161	0	0	0	0	0	1.34029	0	0	2.67603	0.476875	0	0	0	0	0	0.00935658	0	2.28705	0.00935658	5.6429	3.736	0	0.549992	0	0	0	0	0.0186264	0.0725104	0
GABA.CGE.VIP.CALB2	4	2.71547	2.4002	0.376278	0	0	0.00842463	0.4382	0	1.53972	0	0	0.580427	0	0	0	0	0	0.475697	1.54515	0	1.14705	1.61146	4.13146	1.46829	0.777475	2.71266	0	3.24235	0	0	0	0.111938	0
GABA.CGE.VIP.CALB2	4	4.28741	2.8403	0.408654	0	0	0	0.0807796	0	0	0	0	1.55207	0.155519	0	0	0	0.00645083	0	0	0	0.934811	2.29174	5.82809	2.66788	0	2.95348	0	3.56241	0	0	0.798924	0	0
GABA.CGE.VIP.CALB2	4	3.08379	0.733334	0.258583	0	0	0	0.428437	0	1.32615	0	0	1.72689	0	0	0	0	0	0.253825	1.18622	0	1.46463	0.263319	5.71751	3.02376	0	0.762434	0	0.391722	0	0	0.888892	0	0
GABA.CGE.VIP.CALB2	4	3.54378	2.32684	0.1684	0	0	0	0	0	2.12163	0	0	2.31291	0	0	0	0	0	0.597192	0	0	0.769562	0	4.93117	0	0	1.96163	0	1.29731	0	0	0.490786	0	0
GABA.CGE.VIP.CALB2	4	3.81823	2.67902	0.30373	0	0	0	0.0413822	0.880109	2.50114	0	0	1.6931	0.163352	0	0.0167589	0	0.95763	0.469976	0	0	0.937979	0.0413822	5.57713	2.6436	0	2.23974	0	2.24423	0	0	1.00203	0	0
GABA.CGE.VIP.CALB2	4	3.7212	2.29928	0.877478	0	0	0	0.540787	0.119588	2.25795	0	0	0.826483	0	0	0	0	0	0.0221699	0	0	0.958041	0	5.42277	0	0.0294519	2.44549	0	2.78125	0.0221699	0	0	0	0
GABA.CGE.VIP.CALB2	4	3.60195	2.24123	0.41376	0	0	0.00729467	0	0	1.79062	0	0	2.82352	0.268114	0	1.11992	0	0	0.343586	0	0	1.11513	0	6.05304	0.987275	2.1819	2.03919	0	2.54502	0	0	0.778745	0	0
GABA.CGE.VIP.CALB2	4	2.05406	0.728215	0.744375	0	0	0	0.699292	0	0.94027	0	0	2.92711	0	0	0.297047	0	0	2.14102	0	0	1.30134	0	5.83452	3.58636	0.431723	1.58872	0	0	0	0	0.0249932	0	0
GABA.CGE.VIP.CALB2	4	3.43222	2.64621	0.222363	0	0	0	0.109409	0	2.69243	0	0	1.87124	0	0	0	0	0.47851	0.330256	0	0	1.70479	0.450566	5.88268	2.33587	0	1.8685	0	1.01558	0	0	0	0	0
GABA.CGE.VIP.CALB2	4	3.3358	3.10884	0.608639	0	0	0	0.711691	0	2.96293	0	0	1.33318	0	0	0	0	0	0.787111	0.522539	0	1.53278	0.52726	5.94874	0.459043	2.82853	2.53269	0	2.17256	0	0	1.21021	0.358328	0
GABA.CGE.VIP.CALB2	4	3.45486	1.0508	0.503928	0	0	0	0.296556	0	1.82899	0	0	0.952519	0	0	0.125628	0	0	0	0.00702057	0	1.4006	0	6.04973	2.601	0	2.68997	0	3.10733	0.00702057	0	0.460431	0	0
GABA.CGE.VIP.CALB2	4	3.17057	2.0645	0.312544	0	0	0	0.0399574	0	2.45305	0	0.00812023	2.40859	0.909829	0	0	0	0	0	0.430559	0	0.859339	0	5.56658	0.244679	0	1.53569	0	2.53257	0	0	0	0	0
GABA.CGE.VIP.CALB2	4	3.12668	2.72398	0.791033	0	0	0	0.89264	0	0.00869882	0	0.312578	1.87244	0.368507	0	0	0	0	0	0	0	1.24739	1.87914	5.70282	2.97422	0	2.05264	0	0	0	0	0	0	0
GABA.CGE.VIP.CALB2	4	2.83659	1.70642	0.667687	0	0	0	0.391266	0	2.02712	0	0	1.94157	0	0	0.753913	0	0	0	0.916451	0	2.15336	0.454015	4.35291	3.13771	0	1.49419	0	0	0	0	0.65533	0	0
GABA.CGE.VIP.CALB2	4	3.23341	2.8519	1.09679	0	0	0	0.734083	0	2.76521	0	0	2.15558	0.191414	0	0	0	0	0.647609	0.887388	0	1.25901	0.207127	5.58571	1.59565	2.08661	2.8118	0	3.18817	0	0	0.963388	0	0
GABA.CGE.VIP.CALB2	4	3.66684	2.54708	0.594108	0	0	0	0.120551	0	2.09369	0	0	1.65074	0	0	0	0	0.57025	0.937856	0.00850493	0	0.964253	0.790414	5.33579	1.31726	3.61141	3.34429	0	2.34464	0	0	1.93428	0	0
GABA.CGE.VIP.CALB2	4	3.13374	3.14018	0.875104	0	0	0	0.720905	0	2.62034	0	0	1.77992	0	0	0	0	0.185521	0.39327	0.386997	0	0.237998	0.859535	4.58613	0	0.00922307	2.67799	0	2.57904	0	0.00922307	1.08038	0	0
GABA.CGE.VIP.CALB2	4	3.20075	2.55672	0.0724503	0	0	0	0.0420406	0	1.66854	0	0	1.48223	0.246148	0	0	0	0	0	0	0	1.57528	1.6766	4.80355	0	2.96464	2.01126	0	3.00692	0.010677	0	0.010677	0	0
GABA.CGE.VIP.CALB2	4	3.58492	2.47414	0.526377	0	0	0	0.432125	0	0.616624	0	0	1.27984	0.489735	0	0.211884	0	0.381443	1.73194	0.114943	0	0.211884	1.37277	5.18467	0.236223	4.17221	3.27642	0	1.58413	0	0	0.699396	0	0
GABA.CGE.VIP.CALB2	4	3.29051	2.67158	0.609145	0	0	0	0.433593	0	1.20959	0	0.0559727	1.74264	1.45812	0	0	0	0.622473	1.14629	0	0	0.846857	1.91421	4.91548	0.18698	3.83422	3.80334	0.200531	0.220519	0	0	0	0	0
GABA.CGE.VIP.CALB2	4	4.00667	3.22463	0.541057	0	0	0	0.574891	0	2.36501	0	0	1.75145	0	0	0	0	0	0	0	0	1.1485	0.291025	5.11902	0	2.14689	2.16159	0	2.59315	0	0.252414	0.833137	0	0
GABA.CGE.VIP.CALB2	4	2.77621	0.852815	1.28584	0	0	0	0.685494	0	1.66545	0	0	1.16901	0	0	0	0.0367134	0	1.3842	0.445285	0	1.20327	0.786938	5.23878	2.48443	3.54439	2.24484	0	0	0.139399	0	0.261722	0.0123882	0
GABA.CGE.VIP.CALB2	4	3.26679	2.5624	0.923845	0	0	0	0.535418	0	2.72427	0	0	2.11591	2.0267	0	0	0	0	0	0.211924	0	1.10587	0	5.32031	0	3.00631	2.98476	0	2.73098	0	0.160821	1.17477	0.343965	0
GABA.CGE.VIP.CALB2	4	3.27149	3.15715	0.208427	0	0	0	0.117023	0	2.27708	0	0	2.41634	0	0	0	0	0	0.102189	0.612041	0	0.985856	1.01926	5.21821	0	0	2.532	0	1.27135	0	0	0.146048	0	0
GABA.CGE.VIP.CALB2	4	3.23002	2.3	0.588036	0	0	0	0.70072	0	1.99314	0	0	0	0	0	0	0	0	1.7527	0.00648663	0	0.953351	1.75044	5.3575	2.28752	2.8779	2.93827	0.18917	0	0	0.281703	0.598821	0	0
GABA.CGE.VIP.CALB2	4	3.59424	2.96348	1.2238	0	0	0.0105175	0.444923	0	2.96458	0	0	1.86496	0	0	0	0	0	0	0.0515151	0	1.67823	1.35749	5.04572	0.360115	0.0105175	2.91996	0	0.504119	0	0	0.674038	0.100506	0
GABA.CGE.VIP.CALB2	4	3.20844	3.13789	0.435371	0	0	0	0.514127	0	2.76294	0	0	1.78972	0	0	0	0.00969456	0	0.390246	0	0	1.52702	0	5.32416	0.525711	0.019296	1.88137	0	0	0	0	0	0.27875	0
GABA.CGE.VIP.CALB2	4	3.11528	2.32265	0.569219	0	0	0	0.688261	0	1.7015	0	0	0.343237	0	0	0	0	0	1.36194	0.0787192	0	0.955812	1.19412	5.53571	2.32265	1.85715	2.89439	0	0	0.374439	0.409652	1.38457	0	0
GABA.CGE.VIP.CALB2	4	2.56432	1.55655	0.74515	0	0	0	0.0446286	0	1.98136	0	0	0.950102	0	0	0	0	0	0	1.0306	0	1.85224	0	4.21562	0	0	0.862546	0	1.70393	0	0	0.500995	0	0
GABA.CGE.VIP.CALB2	4	3.41367	3.16452	0.710954	0	0	0	0.695415	0	2.4206	0	0	1.88712	0	0	0.0549666	0	0.359915	1.33339	0.0430103	0	1.44003	0.4439	5.33217	0.931456	0.00625875	2.87111	0	2.49322	0	0.282525	0.161944	0.19864	0
GABA.CGE.VIP.CALB2	4	3.87597	2.19775	0.247176	0	0	0	0.291626	1.2259	0.869682	0	0	2.16915	0	0	0.337964	0	0.0515545	0.345482	0.619008	0	1.15012	0	6.21277	1.90418	3.36614	2.61838	0	3.54632	0.0157473	0.124221	0	0	0
GABA.CGE.VIP.CALB2	4	3.63143	0.921334	0.910428	0	0	0	0.0400686	0	1.62425	0	0	2.30063	0	0	0	0.00679058	0	0.888251	0.0400686	0	1.20918	0.00679058	5.89167	3.15288	0.0135354	1.93359	0	1.91669	0	0	0.219371	0	0
GABA.CGE.VIP.CALB2	4	3.1978	0.966962	0.636079	0	0	0	0.218727	0	2.03994	0	0	2.10971	0	0	0	0	0	0	1.17479	0	1.1839	0	5.74322	3.1899	0	1.59014	0	0.131701	0	0	0.506448	0	0
GABA.CGE.VIP.CALB2	4	3.03548	1.94432	0.634864	0	0	0	0.753547	0	1.81807	0	0	2.39543	0.380257	0	0	0.0802297	0	0.648395	0.243974	0	1.0938	1.59195	5.9961	3.87438	0	1.97866	0	0	0.00640528	0	0	0	0
GABA.CGE.VIP.CALB2	4	3.44062	2.00237	0.724363	0	0	0.00650283	0.592762	0	1.60142	0	0	1.38165	0.257414	0	0	0	0.803364	0	0.216231	0	1.72732	0	5.62184	0.436975	0.00650283	1.47841	0	0	0.00650283	0	0	0	0
GABA.CGE.VIP.CALB2	4	2.17858	1.50582	0.349843	0	0	0.0321983	0.0385154	0	1.05034	0	0	0.939062	0	0	0	0	0	0	0	0	1.97466	0	5.38164	0.889222	0.00652313	1.31615	0	0	0	0	0.897258	0	0
GABA.CGE.VIP.CALB2	4	3.02349	2.11946	0.287711	0	0	0.00754807	0.681775	0	2.85971	0	0	1.61256	0	0	0	0	0.0150396	1.84712	0.487881	0	1.00059	0.0298564	6.11935	2.81851	0	2.00689	0	0	0	0	0.321236	0	0
GABA.CGE.VIP.CALB2	4	4.08454	2.42563	0.531276	0	0	0.02362	0.629343	0	0	0	0	2.21379	0	0	0	0.0079355	0.502773	1.49642	0.666845	0	0.804194	0	6.30102	1.85531	2.0587	3.2433	0	3.03678	0	0	1.10909	0	0
GABA.CGE.VIP.CALB2	4	3.13849	2.22187	0	0	0	0.0936036	0.0264094	0	0.0689318	0	0	1.39228	0	0	0	0	0	0	0	0	1.39228	0	5.17746	0.479649	0.00888084	2.33857	0	3.16783	0	0	0.141193	0	0
GABA.CGE.VIP.CALB2	4	2.70172	0.317215	0.222236	0	0	0	0.209703	0	1.5773	0	0	0.0154344	0	0	0	0	0.00774696	0	0.626489	0	1.2224	0	5.11104	3.4431	0	1.64709	0	0	0	0	1.46524	0.0154344	0
GABA.CGE.VIP.CALB2	4	3.94719	3.07343	0.835776	0	0	0.0251026	0.431075	0	1.97161	0	0	2.08902	0	0	0	0	0	0.308196	0.46677	0	1.782	1.09796	5.57189	0.743479	0.00507118	2.32608	0	2.49644	0	0	1.02407	0	0
GABA.CGE.VIP.CALB2	4	3.08768	2.15295	0.618126	0	0	0	0.114269	0	1.03525	0	0	0.0239223	0	0	0	0	0	0	0.107044	0	2.68477	0	4.80075	0.00803787	0	2.60514	0	3.5565	0	0	1.83447	0	0
GABA.CGE.VIP.CALB2	4	3.79463	2.28202	0.450315	0	0	0.0158957	0.0237498	0	0.552185	0	0	2.84718	0.370622	0	0	0	0.301955	0	0	0	0.934599	0.319569	5.73644	3.00901	0.752166	3.00545	0	2.76991	0	0	0.556787	0	0
GABA.CGE.VIP.CALB2	4	3.53815	2.46315	0.388358	0	0	0.00556751	0	0	1.86911	0	0	2.37212	0.788618	0	0	0	0	0	0	0	1.19229	0.00556751	5.35236	0	0	1.55145	0	0.183146	0	0	0.333894	0	0
GABA.CGE.VIP.CALB2	4	3.70004	2.57032	0.370896	0	0	0.0119031	0.446471	0	2.36117	0	0	2.25461	0	0	0	0	0.0410553	0.387288	0.0352924	0	0.650254	0.306916	5.59969	1.6686	0	2.36399	0	2.54245	0	0	0	0	0
GABA.CGE.VIP.CALB2	4	3.37054	2.45187	0.562131	0	0	0.0119983	0.166411	0	2.02928	0	0	2.27614	0.108558	0	0	0	0	0.00601712	0.309039	0	1.4056	0	5.69438	0	0	2.27117	0	0.00601712	0	0.356627	0.259073	0	0
GABA.CGE.VIP.CALB2	4	3.52726	1.45336	0.639493	0	0	0.00607349	0.901004	0	0.00607349	0	0.311534	3.34581	1.47729	0	0	0	0.329222	0	0.847645	0	1.48145	1.098	5.30005	3.9521	0	2.58131	0	0	0	0	0	0	0
GABA.CGE.VIP.CALB2	4	3.51066	1.73098	0.838816	0	0.00439846	0	0.677928	0	0.00439846	0	0	2.50657	1.26262	0	0	0	0.938473	0.827319	0.915798	0	0.675688	1.1658	5.50736	3.71549	0.00439846	2.55806	0	0.00439846	0	0	0.486096	0	0
GABA.CGE.VIP.CALB2	4	3.00542	3.16416	0.869795	0	0	0.0158102	0	0	1.50892	0	0	2.23797	0	0	0	0	0	0	0.181653	0	0.918664	0	5.2964	0	0	2.56001	0	0.786269	0	0	0	0	0
GABA.CGE.VIP.CALB2	4	3.55739	1.63006	0.685787	0	0	0.0161553	0	0	2.69811	0	0	0.630991	0	0	0	0	0	0.0320538	0.941376	0	0.335772	1.40164	6.15483	2.57826	0	2.83138	0	3.59967	0	0	1.16782	0	0
GABA.CGE.VIP.CALB2	4	3.14146	2.22533	0.379068	0	0	0.0263694	0.569965	0	2.63135	0	0	2.48674	0	0	0	0	0	0.414995	0.0263694	0	1.01651	1.10439	6.16607	3.2715	0	1.71002	0	0	0	0	0.22087	0	0
GABA.CGE.VIP.CALB2	4	3.27577	2.38655	0.196869	0	0.00602583	0	0.616378	0	2.19277	0	0	2.27992	0	0	0	0	0	0	0.108708	0	0.361283	0	5.36966	2.37425	0	0.697812	0	0.130162	0	0	0.930265	0.6796	0
GABA.CGE.VIP.CALB2	4	3.33643	2.58627	0.495683	0	0	0.00808896	0.184855	0	2.39918	0	0	1.85136	0	0.00808896	0	0	0.00808896	0.369283	0.402412	0	1.14296	0	5.75018	0.24384	0	2.94817	0	1.21537	0	0	0	0	0
GABA.CGE.VIP.CALB2	4	3.18759	2.18048	0.521438	0	0	0.0404045	0.1384	0	2.53652	0	0	2.20077	0	0	0	0	0	1.85651	0	0	1.01694	0	5.41344	2.15309	0	1.04343	0	0	0	0	0	0	0
GABA.CGE.VIP.CALB2	4	2.6618	2.92216	0.296196	0	0	0.0666739	0.647957	0.00763157	2.89161	0	0	1.13603	0.623618	0	0	0	0	0	0	0	0	0	5.79646	0.698742	0	1.17463	0	0	0	0	0	0	0
GABA.CGE.VIP.CALB2	4	2.42262	1.44616	0.651464	0	0	0.0630497	0.744959	0	1.60048	0	0	1.31924	0	0	0	0	0	0.461037	1.16486	0	0.96584	0	6.21411	3.27675	0.00720506	0.833602	0	0	0	0	1.70434	0	0
GABA.CGE.VIP.CALB2	4	2.96221	2.42311	0.469631	0	0	0.0106468	0.821423	0	2.77266	0	0	2.62129	0	0	0	0	0	1.1359	0	0	0.957643	1.85797	6.19322	3.33925	0	2.92471	0	0	0	0	0.0821597	0	0
GABA.CGE.VIP.CALB2	4	3.43987	2.34875	0.157084	0	0	0.00584817	0.944646	0	2.61899	0	0	1.30939	0.229582	0	0	0	0	1.76655	0.0231902	0	0.131701	2.00214	5.8046	2.48908	0	2.2923	0	0	0.0289047	0.0950467	0.596238	0	0
GABA.CGE.VIP.CALB2	4	2.68845	2.51527	0.32692	0	0	0	0.653922	0	0.429427	0	0	1.06549	0	0	0	0.00621758	0	0.837143	0	0	2.23484	0	5.19652	2.13675	0.00621758	1.28806	0	0.00621758	0	0	0.0779608	0.2809	0
GABA.CGE.VIP.CALB2	4	3.29187	2.22566	0.570438	0	0	0	0.877493	0	2.13324	0	0	1.49869	0	0	0.465891	0.00603718	0.361856	0.67438	0.610693	0	2.01214	0	5.30423	2.20718	0	1.73069	0	0.864823	0	0	0.255155	0.207101	0
GABA.CGE.VIP.CALB2	4	2.82662	2.64981	0.442712	0	0	0.0765541	0.41683	0	1.87997	0	0	0.721811	0	0	0	0	0	0	1.21282	0	1.73803	1.65034	5.65321	0	0	2.70504	0	1.08961	0	0	0	0	0
GABA.CGE.VIP.CALB2	4	3.37556	2.53323	0.593558	0	0	0	0.667388	0	2.11902	0	0	0.86706	0.0906758	0	0	0	0.393305	0.417641	0.732636	0	1.78831	0	4.86823	0	0	2.34777	0	1.20924	0	0	0	0	0
GABA.CGE.VIP.CALB2	4	3.05986	0.724272	0.49581	0	0	0	0.328574	0	1.92581	0	0	0.915329	0.00646217	0	0	0	0	0.21501	0.183135	0	1.49994	0	5.30841	0.347072	0	2.78878	0	2.5392	0	0	0	0	0
GABA.CGE.VIP.CALB2	4	3.08863	2.09681	1.11487	0	0	0.00906616	0.942532	0	0	0	0	0	0.37526	0	0	0.343471	0	1.6726	0.0180509	0.00906616	1.8982	0.684912	4.08791	1.47678	0.297197	1.83628	0	2.50384	0.283573	0	0	0.00906616	0
GABA.CGE.VIP.CALB2	4	3.67153	2.93269	0.190358	0	0	0	0.797802	0	0.401626	0	0	0.641139	0	0	0	0	0	0	0.0295148	0	0.993226	1.15191	4.66562	3.10985	0.00746078	2.63694	0	2.98362	0	0	0.0148663	0	0
GABA.CGE.VIP.CALB2	4	3.54855	2.59493	0.460651	0	0	0	0.53103	0	2.3904	0	0	1.23592	0	0	0	0.00719757	0	0.00719757	0.0354807	0	1.89226	0.00719757	5.78466	0.53103	0.00719757	2.18715	0	2.23773	0	0	0.109371	0	0
GABA.CGE.VIP.CALB2	4	3.4195	0.37894	0.162048	0	0	0.00834211	1.00884	0	1.75207	0	0	1.78634	0	0	0	0	0	0.197048	0.716436	0	0.532783	0.878521	6.4359	2.73165	0	1.59169	0	2.52385	0	0.0410316	1.81403	0	0
GABA.CGE.VIP.CALB2	4	2.76222	2.32326	0.0795858	0	0	0	0.0859407	0	0.00687949	0	0.232953	1.38702	0	0	0	0	0	0.00687949	1.20188	0	2.24231	1.97203	5.82497	1.17879	0	2.29792	0	1.61159	0	0	0.876032	0	0
GABA.CGE.VIP.CALB2	4	2.57254	0.909695	0.63771	0	0	0.0198499	0.231609	0	1.34203	0	0.64825	0.855798	0	0	0	0	0	0	1.21957	0	1.64675	1.12655	5.31249	3.16609	0	2.10625	0	0	0	0	0.860049	0	0
GABA.CGE.VIP.CALB2	4	4.16282	3.45662	0.465991	0	0	0	0.0173079	0	2.14296	0	0	1.03521	0	0	0	0.0343214	1.41709	0.923821	0.14594	0	1.89298	0	2.42176	0.498329	0.0343214	3.15271	0	2.73231	0	0	0	0	0
GABA.CGE.VIP.CALB2	4	3.40085	1.67603	0.0945003	0	0	0	0.159941	0.579204	1.5872	0	0	1.08988	0	0	0	0.0082252	0	0	1.02684	0	0.413477	1.19522	5.24198	0.745134	0	3.24725	0	2.98264	0	0.440421	0	0	0
GABA.CGE.VIP.CALB2	4	3.20824	2.02475	0.366151	0	0	0	0.416906	0	0.883061	0	0.422389	2.43026	0.511284	0	0	0.00830828	0	0	0.139912	0	1.58332	0.785286	4.83656	2.77782	0	1.55905	0	0	0	0	0	0	0
GABA.CGE.VIP.CALB2	4	3.84654	2.4855	0.290025	0	0	0	0.134703	0	0.106298	0	0	2.40205	0	0	0	0	0	0	0.495231	0	1.62484	0	6.04715	2.80634	0	3.00896	0	3.02853	0	0.905843	0	0	0
GABA.CGE.VIP.CALB2	4	3.19923	2.10392	0.384636	0	0	0.00849256	0	0	1.6043	0	0	2.06142	0	0	0	0	0	0.41325	0	0	2.02494	0	5.40496	2.69689	0	2.64194	0	1.50903	0	0	1.41207	0	0
GABA.CGE.VIP.CALB2	4	3.42722	2.64631	0.840347	0	0	0.00497688	0.699539	0	2.6205	0	0	1.72723	0.342966	0	0	0	0	0.963753	0.342966	0	0.6142	0.401416	6.07147	2.35844	0	2.09675	0	0.121971	0	0	0.374335	0.053429	0
GABA.CGE.VIP.CALB2	4	3.2099	2.58444	1.15642	0	0	0	0.581403	0	2.34844	0	0	0.840045	0	0	0	0	0	2.03896	0.0263794	0	0.142974	0	5.80528	1.41279	0	2.85795	0	0	0	0	0	0	0
GABA.CGE.VIP.CALB2	4	3.5294	2.56802	0.312006	0	0	0.00618698	0.251135	0	1.16221	0	0	2.31113	0	0	0.0365604	0.00618698	0.325543	0.689634	0.0245215	0	0.598404	0.974876	5.76856	0.842391	0	2.41285	0	2.36094	0	0	0.0184473	0.196566	0
GABA.CGE.VIP.CALB2	4	2.84738	3.1068	0.396332	0	0	0.0397304	0.615799	0	1.89369	0	0	1.82423	0	0	0	0	0	0	0.0299448	0	1.58114	0	5.33787	0	0	2.68296	0	1.79098	0	0	0.0494212	0	0
GABA.CGE.VIP.CALB2	4	3.66777	1.38632	0.953895	0	0	0	0.592519	0	1.07229	0	0	2.66163	0.00706741	0	0	0	0.576708	0	0.0140852	0	1.43983	0.354555	6.20044	3.02684	0	2.28183	0	3.16739	0	0.0348479	0.544316	0	0
GABA.CGE.VIP.CALB2	4	3.33171	1.40968	0.550934	0	0	0.0161986	0.15826	0	1.45261	0	0	0.59242	0	0	0.0081321	0	0	0.342357	0.172104	0	0.359601	1.09058	5.79157	2.34163	0	3.03852	0	3.84429	0	0.404185	0.754621	0	0
GABA.CGE.VIP.CALB2	4	3.32175	2.38114	0.869055	0	0	0	0.566014	0	1.43566	0.539586	0	0.978429	0.421986	0	0	0.00654091	0.480486	1.50794	0	0	1.41675	2.26142	6.28735	3.03866	4.00903	3.27892	0	0	0	0.0449126	0.476419	0	0
GABA.CGE.VIP.CALB2	4	3.46739	2.78101	0.496715	0	0	0	0.0508457	0	1.97748	0	0	2.14137	0	0	0	0	0	0	0.278886	0	1.46346	0	5.35288	3.03847	0	1.06004	0	0	0	0	0.0172374	0	0
GABA.CGE.VIP.CALB2	4	4.03574	2.96132	0.622192	0	0	0	0	0	0.690235	0	0	0.984953	0	0	0	0	1.3007	0	0.073199	0	1.26042	0.275802	2.51925	0	0.804611	2.23727	0	2.06999	0	0	0	0	0
GABA.CGE.VIP.CALB2	4	3.35613	1.84511	0.492422	0	0	0	0.147617	0	0.716473	0	0	0.788294	0	0	0	0	0	0	0.412338	0	1.34634	0	5.00225	0	0.0131686	2.69278	0	2.97101	0.00660599	0.192347	0.872067	0	0
GABA.CGE.VIP.CALB2	4	3.96959	1.81625	0.144223	0	0	0	0.905776	0	0	0.368824	0	2.11291	0.00964968	0	0	0	0.408269	1.35329	0	0.00964968	1.77439	1.11381	6.03114	0.177248	3.94569	3.31701	0	3.93058	0	0	0	0	0
GABA.CGE.VIP.CALB2	4	3.20337	0.818986	0.900303	0	0	0	0	0	1.18104	0	0	0	0.0095617	0	0.0095617	0.126197	0.0377102	0.548222	0.0284151	0.065088	0.892463	0	5.5743	1.32116	0	1.58937	0	1.14807	0	0	0.222981	0	0
GABA.CGE.VIP.CALB2	4	2.81667	1.13864	0.822035	0	0	0	1.091	0	2.68809	0	0	0.66487	0	0	0	0	0	0	0.00803802	0	1.54676	0	5.49803	0	0.00803802	2.20056	0	2.74464	0	0	0	0	0
GABA.CGE.VIP.CALB2	4	3.25803	0.479893	1.07164	0	0	0	0.32238	0	1.63337	0	0	1.61192	0	0	0	0	0	0.921311	1.63514	0	2.0509	0	5.95361	0.0090166	0	2.24223	0	2.35836	0.0090166	0	0.127391	0	0
GABA.CGE.VIP.CALB2	4	3.47696	0	0.629066	0	0	0.00545918	0.320425	0	0.843606	0	0	1.74661	0	0	0	0	0	0.834143	0	0	1.35709	0.590391	5.80585	3.19399	0	2.06584	0	0.922801	0	0	1.48891	0.617325	0
GABA.CGE.VIP.CALB2	4	4.19072	1.68338	0.749355	0	0	0	0.708405	0	0.723223	0	0	2.06992	0	0	0	0	0	0	0.0180262	0	0.665706	1.64082	6.32489	2.79695	0	3.12238	0	3.1945	0	0	0.0925898	0	0
GABA.CGE.VIP.CALB2	4	4.39612	2.24529	0.480264	0	0	0	0.143343	0	0.318949	0	0	2.48496	0	0	0.722518	0	1.44944	0	0.489163	0	1.60896	0.600817	5.63364	0.265003	3.45037	3.16017	0	2.87484	0	0	1.60703	0	0
GABA.CGE.VIP.CALB2	4	3.85101	2.17804	0.327494	0	0	0	0.0924623	0	2.58731	0	0	2.90765	0	0	0	0.00876798	0	0	0	0	1.45918	0	5.54653	2.08727	0.00876798	0.996383	0	0.0346199	0	0	0	0	0
GABA.CGE.VIP.CALB2	4	3.36598	1.72657	0.438177	0	0	0	0.763865	0	0.0116316	0	0	1.80461	0	0	0	0	0	1.61668	0.0568507	0	1.23698	1.0631	6.55697	2.24818	4.54752	2.71379	0	3.28787	0	0	0	0	0
GABA.CGE.VIP.CALB2	4	3.33933	1.90814	0.783427	0	0	0	0.261644	0	2.36421	0	0	1.84448	0	0	0	0	0	0	0.155094	0	0.998477	0.486925	5.67115	0.00726776	0	1.43038	0	0	0	0	0	0	0
GABA.CGE.VIP.CALB2	4	3.5043	2.28055	0.782651	0	0	0	0.173716	0	1.87865	0	0	1.5494	0.00610126	0.00610126	0	0	0.585333	0	0	0	1.21444	0.0934162	5.65693	3.77226	0	1.97994	0	2.50289	0	0	0.442704	0	0
GABA.CGE.VIP.CALB2	4	3.08906	2.70447	0.639487	0	0	0.00731342	0.947071	0	2.79188	0	0	2.61192	0	0	0	0	0	0	0.932734	0	1.74905	0.475761	5.37685	2.44968	0.00731342	1.17519	0	0.819718	0	0	0	0	0
GABA.CGE.VIP.CALB2	4	2.38894	1.54628	0.415978	0	0	0.00591182	0.6268	0	0.101408	0	0	2.78189	0.682258	0.00591182	0	0	0.657989	0	0	0	1.61345	1.85191	5.56822	3.89865	0.0117889	2.01154	0	0	0	0	0	0	0
GABA.CGE.VIP.CALB2	4	3.50304	2.41192	0.227193	0	0	0.00591437	0	0	1.69759	0	0	0.969719	0.895019	0	0	0	1.04341	0	0	0	1.38816	1.05999	4.85103	0	1.61379	3.15724	0	1.99108	0	0	0	0	0
GABA.CGE.VIP.CALB2	4	3.63364	2.30404	0.469901	0	0	0	0.283834	0	2.43121	0	0	2.20492	0	0	0	0	0.0333893	0.14708	0.668179	0	0.662361	0.353759	5.84387	0.00564288	0.00564288	2.34228	0	2.21608	0	0	0.544838	0	0
GABA.CGE.VIP.CALB2	4	4.32469	2.6118	0.210738	0	0	0.00881346	0.00441644	0	2.00331	0	0	1.98219	0	0	0.0684241	0	0.800233	0	0	0	0.0305131	0	5.41748	0	1.21433	2.62471	0	2.77868	0	0	0	0	0
GABA.CGE.VIP.CALB2	4	4.21287	2.6163	0.640207	0	0	0	0.437364	0	2.18928	0	0	2.34848	0.170632	0	0	0	0	0.810885	0	0	0.178644	0.473664	5.66197	2.82508	0	0.958467	0	0.930642	0	0	0.336994	0	0
GABA.CGE.VIP.CALB2	4	2.36238	2.70626	0.533696	0	0	0	0.11357	0	2.81774	0	0	2.03297	0	0	0	0	0.0583965	0	0.987229	0	1.24287	0.06354	5.81144	2.67021	0	1.04077	0	0	0	0	1.03302	0	0
GABA.CGE.VIP.CALB2	4	2.73171	1.36576	0.532291	0	0	0	1.42265	0	1.65844	0	0	1.93306	0	0	0	0	0	1.18763	0.353909	0	1.5454	1.86209	5.78567	3.93275	0.00971418	1.46187	0	0	0	0	0.889923	0	0
GABA.CGE.VIP.CALB2	4	2.79356	1.04733	0.760098	0	0	0	0.397381	0	1.51683	0	0	2.05678	0	0	0	0.0201262	0	2.24464	1.24125	0	1.1062	1.18692	6.46192	1.64635	4.05032	2.84391	0	0.218301	0	0	1.64242	0	0
GABA.CGE.VIP.CALB2	4	2.73634	2.15746	0.505476	0	0	0.00675829	1.66501	0	0.929225	0	0	1.27827	0.150786	0	0	0	0	0.942524	0.942524	0	1.45602	1.78912	5.73628	3.44767	2.41035	2.83701	0	0.00675829	0	0	0.978848	0	0
GABA.CGE.VIP.CALB2	4	3.09972	1.22577	0.873771	0	0	0	0.630459	0	0.417035	0	0.171029	2.35602	0.124315	0	0	0	0	0.29488	0.46352	0	1.1506	2.20682	5.77745	3.36967	0.0059989	2.36962	0	0	0	0	0.196068	0	0
GABA.CGE.VIP.CALB2	4	2.58247	2.24807	0	0	0	0	0.178237	0	0.990989	0	0	2.7071	0	0	0	0	0	0	1.81399	0	2.42291	1.15181	5.37827	0	0.00882947	2.22054	0	0	0	0	0	0	0
GABA.CGE.VIP.CALB2	4	2.40873	1.98551	0.956913	0	0	0	0.802089	0	1.62937	0	0	2.25453	0	0	0	0.00729591	0	1.33234	0.610905	0.00729591	1.61491	1.04824	6.05678	3.64739	0	3.06616	0	0.00729591	0	0	0.02173	0	0
GABA.CGE.VIP.CALB2	4	2.67967	2.10271	0.581964	0	0	0	0	0	2.93436	0	0	1.93713	0	0	0	0	0	0	0.623299	0	1.67248	0.747746	5.566	2.2137	0	1.62225	0	0	0.00684218	0	0.00684218	0	0
GABA.CGE.VIP.CALB2	4	2.90169	0.815273	0.847171	0	0	0	0.962673	0	0.470378	0	0	2.02322	0	0	0	0	0.0217352	0	0	0	1.07374	0.871976	5.77757	2.45339	0	2.30859	0	0	0.00729768	0	0.136703	0	0
GABA.CGE.VIP.CALB2	4	2.89195	2.01832	0.285776	0	0	0	0.402923	0	1.93936	0	0	2.35236	0.437492	0	0	0.751506	0	1.16637	0.382619	0.00748994	0.923722	0.285776	5.78715	4.05293	0	1.84059	0	0.00748994	0	0	0	0	0
GABA.CGE.VIP.CALB2	4	3.09223	1.39779	0.474287	0	0	0	0.592861	0	0.00593205	0	0	2.20012	1.49041	0	0	0	0.331229	0.991643	0.335492	0	0.11243	1.89852	5.8665	1.72154	0	2.69525	0	0	0	0.107099	0.0118291	0	0
GABA.CGE.VIP.CALB2	4	3.24749	1.57152	0.404406	0	0	0	1.39739	0	0.935863	0	0	2.97903	0	0	0	0	0	0	0.632896	0	0.621322	2.05954	6.36635	0	0	1.79182	0	2.1205	0	0	1.41597	0	0
GABA.CGE.VIP.CALB2	4	2.75691	2.16255	0.26496	0	0	0.00570781	0.533019	0	0.80743	0	0	1.09976	0	0	0	0	1.05891	0.93658	0.34915	0	0.670866	1.32416	5.95096	0.055663	2.94094	2.78522	0	1.61652	0	0	1.4738	0	0
GABA.CGE.VIP.CALB2	4	3.87409	2.56943	0.242989	0	0	0	0.272742	0	1.42759	0	0	2.49376	0	0	0.604678	0	0.0163685	0.053551	0.00548601	0	1.25675	1.15812	6.13849	2.56943	1.56082	2.54469	0	3.31753	0	0	1.50501	0	0
GABA.CGE.VIP.CALB2	4	2.49087	1.99129	0.777432	0	0	0	1.05397	0	0.617377	0	0	2.97128	1.05397	0	0	0	0	0.320284	0.180689	0.00616975	1.04531	1.1814	5.8612	2.70634	0	2.61101	0	0	0.00616975	0	0	0	0
GABA.CGE.VIP.CALB2	4	2.66026	2.84562	0.918551	0	0	0	1.1441	0	1.15872	0	0	0.393443	0	0	0	0	0	0	0	0	1.66503	0.304984	5.28501	0	0.00658205	0.561231	0	1.31037	0	0	0	0	0
GABA.CGE.VIP.CALB2	4	3.46225	0.573457	0.272495	0	0	0	0.167818	0	1.87566	0	0	1.70762	0	0	0	0	0	0	1.7186	0	2.07125	0.231929	5.83168	0.391066	0.050889	2.82969	0	2.26593	0	0	1.21134	0	0
GABA.CGE.VIP.CALB2	4	2.47653	0.143625	0.739969	0	0	0	0.00732792	0	0.130802	0	0	1.6372	0.00732792	0	0.0361142	0	0	0	0.280365	0	1.90758	0.434544	5.29511	2.62395	0.00732792	1.5568	0	0.00732792	0	0	0.490122	0	0
GABA.CGE.VIP.CALB2	4	2.72284	2.21665	0.467515	0	0	0	0	0	1.09354	0	0	0.922709	0	0	0	0	0	0	0	0	2.10748	1.59751	5.15871	0	0	2.09403	0	0.534133	0	0	0.795339	0	0
GABA.CGE.VIP.CALB2	4	3.61697	2.42598	0.456111	0	0	0	0.213755	0	0.840151	0	0	2.32347	0.237527	0	0.00594031	0	0	0.616262	0	0	1.82764	1.89613	5.84314	2.65847	0	1.90504	0	3.19763	0	0	0.994727	0	0
GABA.CGE.VIP.CALB2	4	2.57406	1.32221	0.120728	0	0	0	0.139505	0	2.15911	0	0.558772	1.32031	0	0	0	0	0	0	1.33917	0	1.49458	0.205486	4.77891	0.0071035	0	1.52761	0	0.495666	0	0	0.0141569	0	0
GABA.CGE.VIP.CALB2	4	3.00349	1.42851	0.239498	0	0	0	0.600674	0	1.15394	0	0.504632	0.894118	0	0	0	0	0.848347	0	0.845878	0	1.52574	0.747272	5.25803	0.760815	0.00574117	1.54558	0	0.00574117	0	0	0	0	0
GABA.CGE.VIP.CALB2	4	3.12421	1.2052	0.352777	0	0	0	0.936505	0	0.742375	0	0	1.75685	0	0	0	0	0	0.178345	0.404758	0	1.04327	0.767862	5.70205	2.93467	0	1.73221	0	0	0	0	1.91175	0	0
GABA.CGE.VIP.CALB2	4	2.46379	1.90329	0.0926458	0	0	0	0.429922	0	0.901204	0	0	1.10067	0	0	0	0	0	0.225054	0.934797	0	1.60673	0.138757	5.35232	0	0.00645069	0.979523	0	0.225054	0	0.0504766	0.00645069	0	0
GABA.CGE.VIP.CALB2	4	3.16929	2.38636	0.318736	0	0	0	1.31491	0	0.537056	0	0	1.88657	0.0553183	0	0	0	0.0113112	0.855977	0	0.00567159	1.03272	1.36116	5.73073	2.98327	2.25759	2.86997	0	0.00567159	0.0113112	0	0.499804	0	0
GABA.CGE.VIP.CALB2	4	3.2949	0.27941	0.199306	0	0	0	0.775021	0	1.60796	0	0	1.8774	0	0	0	0	0	0.97932	0.171112	0	1.76585	0.576852	5.77066	3.00314	0	1.48133	0	0	0	0.257795	0	0	0
GABA.CGE.VIP.CALB2	4	2.41994	1.80442	0.600806	0	0	0	0.175378	0	1.82637	0	0	2.74391	0.844872	0	0	0	0	1.85009	0.0751991	0	0.506992	1.59024	5.36217	3.51101	0.00707481	0.738782	0	0	0	0	0	0	0
GABA.CGE.VIP.CALB2	4	2.85259	2.40891	0.505545	0	0	0	0	0	2.64385	0	0	1.82499	0	0	0	0	0.304616	0.72088	1.40269	0	0.595984	0	5.75519	0.00601753	0.00601753	0.985039	0	0.00601753	0	0	0	0	0
GABA.CGE.VIP.CALB2	4	2.86271	2.19118	0.545983	0	0	0.0144216	0.781102	0	2.66927	0	0	1.57134	0	0	0	0	0	1.12167	0.0426555	0	1.07815	0.976812	5.82637	0.0072368	0.0144216	2.83495	0	0.260659	0	0	0.885237	0	0
GABA.CGE.VIP.CALB2	4	2.95532	0.0378242	0.335283	0	0	0	0.253956	0	2.04801	0	0	1.63282	0	0	0	0	0	0.00640422	0.126562	0	2.04302	0.970141	5.29142	2.25937	0.00640422	1.77313	0	0	0	0	0.00640422	0	0
GABA.CGE.VIP.CALB2	4	2.59469	3.09056	0.261177	0	0.00646726	0	0.69598	0	2.02282	0	0	1.38406	0	0.00646726	0	0	0	0	0.031926	0	0.256168	0.144721	5.60119	0.383323	0	0.873369	0	0.256168	0	0	0	0	0
GABA.CGE.VIP.CALB2	4	2.89081	2.25429	0.326928	0	0.00700634	2.20204	0.588635	0	2.91282	0	0	1.43319	0	0	0.342024	0	0	0.572901	0.0139639	0.00700634	0.274895	1.52907	5.75972	2.96636	0	1.83853	0	0	0	0	1.28912	0	0
GABA.CGE.VIP.CALB2	4	3.87654	1.78443	0.212589	0	0	0	1.17172	0	1.25691	0	0	1.17595	0	0	0.933837	0	0	0.00454498	0.958594	0	0.799928	0	5.78985	3.03373	2.83552	2.63325	0	2.87098	0.00454498	0	1.0955	0	0
GABA.CGE.VIP.CALB2	4	3.1732	1.93593	0.796752	0	0	0	0.62261	0	0.0502836	0	0	1.40007	0	0	0	0	0.0317223	0.00642548	0.00642548	0	0.676471	0.00642548	5.37208	0	0.0191539	0.779163	0	1.57331	0	0.576605	0	0	0
GABA.CGE.VIP.CALB2	4	3.46369	1.52738	0.869202	0	0	0	0	0	0.810879	0	0	1.71263	0	0	0	0	0	0	1.03821	0	2.38545	1.46886	5.77973	2.31125	0.00840971	2.83392	0	3.95869	0	0	1.29753	0	0
GABA.CGE.VIP.CALB2	4	3.22645	2.52234	0.468307	0	0	0.00725761	0.407195	0	1.71031	0	0.00725761	1.14005	0	0	0	0	0	0	0	0	1.66999	0.00725761	5.3371	0	0.0144629	2.51117	0	1.63795	0	0.0703094	0	0	0
GABA.CGE.VIP.CALB2	4	3.18544	2.31421	0.507015	0	0	0.00553363	0.53014	0	2.05522	0	0	2.2473	0	0	0	0	1.05044	0	0.00553363	0	1.64877	0.359644	5.03422	0	1.52995	2.64979	0	2.29315	0	0	0.186738	0.00553363	0
GABA.CGE.VIP.CALB2	4	3.63789	1.74023	0.292855	0	0	0	0.0371083	0	0.0107436	0	0	1.09443	0.374088	0	0	0.00538623	0	0	0	0	1.42018	0	6.06421	0	0	2.50595	0	1.65728	0	0	0	0	0
GABA.CGE.VIP.CALB2	4	2.34087	1.36246	1.02031	0	0	0.0301287	0.500762	0	1.97748	0	0	0.945942	0	0	0	0	0	0.0665563	0.0151778	0	0.576598	0	5.67476	3.56051	0.705407	2.28019	0	0	0.0877924	0	0	0	0
GABA.CGE.VIP.CALB2	4	2.82872	2.45086	0.737769	0	0	0.0173096	0.455009	0	2.58387	0	0	1.70084	0	0	0	0	0	1.1713	0	0	1.27651	0	5.76471	2.5924	0	1.55898	0	0	0	0	0.11531	0	0
GABA.CGE.VIP.CALB2	4	2.99699	2.14732	0.929612	0	0	0	1.0012	0	0.377268	0	0	2.33566	0	0	0	0	0	1.31698	0.152306	0	0.381289	0	5.78206	2.68035	0.00585838	1.71126	0	0	0	0	0.0116826	0	0
GABA.CGE.VIP.CALB2	4	3.48198	2.71826	0.284387	0	0	0	0.0957752	0	2.87709	0	0	2.17979	0	0	0	0.0181099	0	1.05701	0	0	1.17657	0.474766	5.93894	2.11635	0.013613	1.69811	0	0	0.0045583	0	0	0	0
GABA.CGE.VIP.CALB2	4	3.32179	1.65179	0.116773	0	0	0	0.894753	0	0.870154	0	0	2.60894	0.205313	0	0	0	0	0	0.0899656	0	0.450932	0.4446	5.50183	4.05491	0	0.944138	0	0	0	0.0147543	0.920737	0	0
GABA.CGE.VIP.CALB2	4	3.93456	2.45246	0.527116	0	0	0	0.759859	0	2.14703	0	0	2.47007	0.267258	0	0.655127	0.00623314	0	0	0	0	0.981871	1.48193	6.07691	1.89309	0.00623314	2.44381	0	3.26902	0.00623314	0	0.0124277	0	0
GABA.CGE.VIP.CALB2	4	3.7084	2.0121	0.325953	0	0	0.00512484	0.805698	0	2.40242	0	0	3.06832	0	0	0	0.00512484	0	0	0	0	0.675972	1.03451	5.65077	0	0.0102236	1.48657	0	2.04521	0	0	0	0	0
GABA.CGE.VIP.CALB2	4	3.37242	2.3857	0.0942097	0	0	0	0.589269	0	2.34215	0	0	2.12713	0	0	0	0	0	0.121919	0.50349	0	0.388948	1.14502	6.14164	3.06542	0	1.10902	0	0	0.0061554	0	0	0	0
GABA.CGE.VIP.CALB2	4	3.19149	2.50832	0.370421	0	0	0	0.217591	0	0.528758	0	0	2.80026	0	0	0	0	0	0.884039	0.879566	0	1.1593	0.879566	5.46215	3.84047	0.0160753	1.61751	0	0	0.0053872	0	0	0	0
GABA.CGE.VIP.CALB2	4	3.78591	2.02575	0.293299	0	0	0	0.436011	0	0	0	0	2.43324	0.884652	0	0	0.00585941	0.782566	0	0	0	1.34811	0.732991	5.95722	2.89953	0.0116847	0.229977	0	1.82563	0	0.373286	0.0844783	0	0
GABA.CGE.VIP.CALB2	4	2.89418	1.60054	0.414707	0	0	0	0.288805	0	1.55554	0	0	1.94754	0	0	0	0	0	0	0.544746	0	0.942015	0	5.30259	2.88813	0.0154535	0.00775662	0	0	0.00775662	0	0	0	0
GABA.CGE.VIP.CALB2	4	3.47569	2.2515	0.612919	0	0	0	0	0	2.38407	0	0	2.01117	0	0	0	0	0	0.00624573	0	0	1.12292	1.08554	6.18741	2.86343	0.00624573	1.53204	0	0	0	0	0	0	0
GABA.CGE.VIP.CALB2	4	3.75426	3.12075	0.386155	0	0	0	0.181276	0	2.24957	0	0	2.82123	0	0	0	0	0	1.06354	0	0	0.569052	0	5.68839	2.67242	0	1.30606	0	0	0	0	1.30452	0	0
GABA.CGE.VIP.CALB2	4	3.47596	1.90023	0.475843	0	0	0	0.238103	0	2.0133	0	0	0.594704	0	0	0	0	1.02899	0.00595645	0.0294337	0	1.28556	0.951327	5.8088	1.4299	0.00595645	2.24068	0	2.57107	0.00595645	0	0	0	0
GABA.CGE.VIP.CALB2	4	3.43648	1.88369	0.522436	0	0	0	0.354785	0	0.61293	0	0.00589749	1.42375	0.259086	0	0	0	0	0.00589749	0.00589749	0	0.193044	0	5.77403	1.85819	0	2.81884	0	2.33541	0	0	0	0	0
GABA.CGE.VIP.CALB2	4	3.73205	2.55372	0.0863949	0	0	0	0.121966	0	0.553203	0	0	0	0	0	0	0.00562396	0	0.457994	0.235128	0	1.20105	2.15401	5.14955	0	0.794149	2.11123	0	3.21493	0	0	0.0112165	0	0
GABA.CGE.VIP.CALB2	4	3.50003	1.59612	0.151982	0	0	0	0.674447	0	0	0	0	3.24362	2.0127	0	0	0	0	1.22915	0	0	1.1664	0.611166	5.98293	3.43643	0.00545638	2.64255	0	0	0	0	0.671656	0	0
GABA.CGE.VIP.CALB2	4	3.2174	2.24836	0.175108	0	0	0	0.278148	0	2.0792	0	0	1.80572	0	0	0	0	0	1.22831	0.700007	0	0.619823	1.02775	5.61023	2.4606	0.00515895	2.59819	0.225893	0.225893	0	0	1.5361	0	0
GABA.CGE.VIP.CALB2	4	3.93954	1.77538	0.791907	0	0	0	0.290014	0	2.22451	0	0	2.40581	0	0	0	0	0	0.600534	0	0	0.721445	0	5.86409	3.14076	0	2.23806	0	1.13424	0	0	0	0	0
GABA.CGE.VIP.CALB2	4	3.75368	2.62317	0.400243	0	0	0	0.737088	0	2.06567	0	0	0.92794	0	0	0	0	0	0	0.0174254	0	0.948575	1.39214	5.80231	0	0.0345523	2.91152	0	1.8721	0	0	0	0	0
GABA.CGE.VIP.CALB2	4	3.39205	2.18661	0.355901	0	0	0	0	0	1.31197	0	0	2.61287	0	0	0	0	0	0	0.00617604	0	0.640957	0	4.51606	0	0	1.88619	0	0.306984	0	0	0	0	0
GABA.CGE.VIP.CALB2	4	3.03374	1.20113	0.142768	0	0	0	0.193715	0	1.7037	0	0	1.01499	0	0	0	0	0	0	0.0109019	0	1.54746	0	5.36508	2.00465	0.00546583	0.885834	0	0	0.00546583	0	0.0376479	0	0
GABA.CGE.VIP.CALB2	4	3.51185	2.332	0.522146	0	0	0	0.286129	0	1.41399	0	0	1.61217	0	0	0	0	0	0.00767431	0.226519	0	0.201643	0	5.3684	0	0	2.75702	0	2.3305	0	0	0.3369	0	0
GABA.CGE.VIP.CALB2	4	3.36218	2.48145	0.560678	0	0	0	0.901705	0	1.14712	0	0	1.29968	0	0	0	0.0066316	0.0066316	0	0.297129	0	0.0327268	0	5.27545	0	2.05242	2.48422	0	2.94679	0.0066316	0	0.0197643	0	0
GABA.CGE.VIP.CALB2	4	3.29372	1.89286	0.212918	0	0	0	0.745419	0	2.58473	0	0	2.44747	0	0	0	0.00563371	0	0.384526	0	0	0.698771	0.812801	5.67033	0.745419	0	2.12969	0	0	0	0	0.500597	0.646887	0
GABA.CGE.VIP.CALB2	4	3.04881	0.935188	0.672573	0	0	0	0.868997	0	0.267407	0	0	3.16155	0.806976	0	0	0	0.0292366	1.48429	0.0435405	0	0.490371	1.20562	5.77825	4.05553	0.00493252	2.24659	0	0	0.00493252	0	0.580095	0	0
GABA.CGE.VIP.CALB2	4	2.57164	2.5089	0.414634	0	0	0	0	0	2.45281	0	0	3.22533	0	0	0	0	0	1.43704	0.892488	0	1.33854	0.542672	6.36561	1.80838	0.00624651	2.19951	0	0	0	0	0.755132	0	0
GABA.CGE.VIP.CALB2	4	3.1478	2.46974	0.375427	0	0	0	0.0560708	0	2.56508	0	0	2.22182	0	0	0	0	0	0.00575069	0.00575069	0	0.297164	1.26345	5.78508	2.18098	0	1.5119	0	0	0.00575069	0	0	0	0
GABA.CGE.VIP.CALB2	4	3.44479	1.03513	0.686912	0	0	0.0291392	0.111784	0	0.817799	0	0	2.64061	0	0	0	0	0	0.17827	0	0	1.26493	0.168325	5.95849	2.66313	0.0117578	2.305	0	2.42441	0	0	0	0	0
GABA.CGE.VIP.CALB2	4	2.61385	2.28239	0.518977	0	0	0	0.00547136	0	0.515707	0	0	0.888689	0.267915	0	0	0	0	0	1.31258	0	1.45671	0	4.68335	0	0	2.34794	0	1.82825	0	0	0.612424	0	0
GABA.CGE.VIP.CALB2	4	3.53382	1.58143	0.152151	0	0	0	0.876605	0.829082	1.16527	0	0	1.62628	0	0	0	0.01167	0	0.00585201	0.839277	0	1.56316	0.757411	6.07319	2.65735	1.6997	1.92362	0	2.46505	0.00585201	0	1.52685	0	0
GABA.CGE.VIP.CALB2	4	3.19529	2.75588	0.443022	0	0	0	0.0415366	0	2.89177	0	0	2.29501	0.287606	0	0	0	0	0.624013	0	0	0.212116	0	5.86944	2.19291	0	1.60434	0	0	0	0	0.0530941	0	0
GABA.CGE.VIP.CALB2	4	2.89217	3.0119	0.135085	0	0	0	0.571761	0	2.61339	0	0	1.63558	0	0	0	0	0	2.07309	1.02876	0	1.53841	0	5.84017	2.60426	0.00686375	1.8953	0	0	0	0	0	0	0
GABA.CGE.VIP.CALB2	4	3.44437	0.632458	0.668623	0	0	0	0.591453	0	1.68028	0	0	0.764025	0	0	0.224795	0	0	0	0.507825	0	1.07657	0.908616	5.81426	3.08025	0.665389	2.26718	0	2.39853	0	0	0.566733	0	0
GABA.CGE.VIP.CALB2	4	2.78954	0.273085	0.3152	0	0	0	0.234099	0	0.657248	0	0	2.76611	0	0	0	0	0	0	0.167315	0	2.06393	0	5.85213	2.63141	0.0248106	1.63435	0	0.411248	0	0	0.943928	0	0
GABA.CGE.VIP.CALB2	4	3.3055	1.63212	0.157256	0	0	0	0.207118	0	2.15537	0	0	1.34181	0	0	0	0	0.268783	0.349835	0	0	1.45433	0.894128	5.50763	0	0.0137132	2.0772	0	2.51996	0	0	0	0	0
GABA.CGE.VIP.CALB2	4	2.96392	0.63289	0.335734	0	0	0	0.0105829	0	1.52287	0	0	2.37942	0	0	0	0	0	0.00530545	0.120153	0	1.85286	0.787047	5.61737	3.26774	0.0105829	2.02274	0	0	0	0	0.745012	0.0158327	0
GABA.CGE.VIP.CALB2	4	3.75641	2.47582	0.638689	0	0	0	0.519626	0	0.810185	0	0	0.752805	0	0	0	0	0	0	0.16079	0	1.08417	1.41935	5.32407	0.232426	0.00543639	2.07868	0	2.03619	0	0.315308	0	0	0
GABA.CGE.VIP.CALB2	4	2.95622	2.46831	0.534686	0	0	0	0.999063	0	1.75932	0	0	0.795255	1.17285	0	0	0	0	0.01462	0	0	0.928869	0	4.99727	0	0.00733669	1.74656	0	2.43791	0	0	0.0218505	0	0
GABA.CGE.VIP.CALB2	4	3.30652	1.91831	0.645196	0	0	0	0.0108608	0	1.02047	0	0	2.43421	0	0	0	0	0	0.595281	0.224071	0	1.76431	0.815923	5.34775	3.2914	0	1.94286	0	0.00544515	0	0	1.40596	0	0
GABA.CGE.VIP.CALB2	4	3.17792	1.55495	0.673225	0	0	0	0	0	2.00781	0	0	1.67512	0.31694	0	0	0	0	0	0.490317	0	1.64067	0	5.03727	2.21103	0.0056344	1.46642	0	0	0	0	1.13384	0	0
GABA.CGE.VIP.CALB2	4	3.93227	1.71197	0.301934	0	0	0	0.332729	0	2.53285	0	0	0.995459	0	0	0	0	0.0746843	0	0.654135	0	1.69658	0.797307	5.9464	1.50487	0.00702472	2.8563	0	3.86779	0	0	0.761745	0	0
GABA.CGE.VIP.CALB2	4	3.17199	3.13321	0.339429	0	0	0	0.173702	0	0	0	0	1.90077	0	0	0	0	0	0.00821404	0.521512	0	1.78871	0.0483017	4.93188	0.0561299	0	1.92753	0	0.22768	0	0	0	0	0
GABA.CGE.VIP.CALB2	4	3.27895	1.1064	0.71423	0	0	0	0	0	0.348574	0	0	2.19477	0	0	0	0	0	0	1.46881	0	1.47766	0	4.66536	3.54104	0.00769339	1.07526	0	0	0	0	0	0	0
GABA.CGE.VIP.CALB2	4	2.91204	0.940598	0.725807	0	0	0	0.45535	0	0.949058	0	0	3.35687	0	0	0	0	0	1.71451	0.751797	0	1.40864	0	5.63037	3.56524	0	0.19243	0	0	0	0	1.69472	0.0215298	0
GABA.CGE.VIP.CALB2	4	2.75049	2.05151	0.21417	0	0	0	0	0	0.866563	0	0	1.07025	0	0.00541336	0	0.00541336	0	0.740252	1.00883	0	2.01455	0	5.28277	1.19273	0.0107976	1.43698	0	3.15558	0	0	0	0.648103	0
GABA.CGE.VIP.CALB2	4	3.81194	0.865678	0.0822465	0	0	0.0199695	0.118728	0	2.09185	0	0	0	0	0	0.00502988	0	0.921384	0.0100346	0.915345	0	0.719737	1.31993	5.80725	0	2.0388	2.61461	0	3.6432	0	0	0	0	0
GABA.CGE.VIP.CALB2	4	3.42507	0.00500008	0.0393177	0	0	0.00500008	0.126932	0	1.31825	0	0	1.46287	0	0	0.0536722	0	0	0.00500008	1.19719	0.00500008	0.337192	1.04367	5.73175	3.10205	0	1.30066	0	0.949332	0	0.52279	0.879021	0.919802	0
GABA.CGE.VIP.CALB2	4	3.99568	1.71246	0.47308	0	0	0	0.206729	0	2.20326	0	0	2.01455	0	0	0	0.00558557	0.735551	0	0.0221575	0	0.916739	1.3966	5.86452	3.34918	0	2.4357	0	3.00822	0	0.396965	0	0	0
GABA.CGE.VIP.CALB2	4	3.89919	2.6749	0.208375	0	0	0	0	0	1.99039	0	0	1.8681	0	0	0	0.00525153	1.02234	0.0104756	0	0	0	0.719336	5.87142	0.00525153	0.00525153	2.47293	0	0.802939	0	0	0	0	0
GABA.CGE.VIP.CALB2	4	4.11001	1.79089	0.485105	0	0	0.00498233	0.00498233	0	0.00498233	0	0	1.95496	0	0	0	0	0	0	0	0	1.0845	1.45198	5.98253	3.36023	0.156852	2.24666	0	3.42406	0.00498233	0	1.04136	0	0
GABA.CGE.VIP.CALB2	4	4.27594	1.32389	0.91338	0	0	0	0.0485594	0	1.45655	0	0	2.50223	0	0	0	0.00708311	0.708379	0	0	0	1.19054	1.56626	6.01606	3.06043	0.498865	2.71535	0	2.69203	0	0	0.860687	0	0
GABA.CGE.VIP.CALB2	4	3.56314	1.3099	0.544479	0	0	0	0.280695	0	1.37206	0	0	2.06167	0.0053863	0	0.0053863	0	0.140825	0	0.835948	0	0.473057	0.995716	5.66803	0	0	2.09611	0	1.66855	0	0	0.35534	0	0
GABA.CGE.VIP.CALB2	4	3.12552	1.7343	0.292266	0	0	0	0.515081	0	1.48388	0	0	1.27591	0	0	0	0.00513013	0	0.467892	0.0153121	0	0.925219	0	5.60169	1.08157	0	1.84749	0	2.03273	0	0	0	0	0
GABA.CGE.VIP.CALB2	4	4.32988	1.27971	0.684295	0	0	0	0	0	0.434479	0	0	2.73365	0.343109	0	0	0	0.117965	0	0.406011	0	1.19009	1.06046	6.04439	3.1742	0.00958504	1.45942	0	3.00376	0	0	1.27703	0	0
GABA.CGE.VIP.CALB2	4	3.63981	0.806229	0.210544	0	0	0.0155025	0.0458046	0	1.12086	0	0	0.669377	0	0.00519425	0	0	0	0.0155025	0	0	0.279812	1.1526	5.40821	0	2.14364	2.41237	0	3.25277	0.00519425	0	0.856124	0	0
GABA.CGE.VIP.CALB2	4	3.35137	1.05873	0.552869	0	0	0	0.215315	0	0.878203	0	0.186734	2.08734	0	0	0	0	0.948294	0	0	0	0.392384	1.50869	6.03581	2.20139	0.24993	1.94993	0	2.6431	0	0.953358	0	0.00435872	0
GABA.CGE.VIP.CALB2	4	3.21421	1.62127	0.815428	0	0	0	0.0494985	0	2.25569	0	0	2.15114	0	0	0	0	0	0	0.00842177	0	1.66542	0	5.15941	2.42714	0.00842177	2.04318	0	0	0	0	0	0	0
GABA.CGE.VIP.CALB2	4	3.27945	1.85119	0.333578	0	0	0	0.849059	0	2.11875	0	0	0	0.301555	0	0	0.0430547	0.640536	0	0.00876051	0	1.58341	1.64131	5.47766	0	0	2.83094	0	3.15658	0	0	0	0	0
GABA.CGE.VIP.CALB2	4	3.09975	2.57892	0.492055	0	0	0	0.231331	0	2.58573	0	0	2.36464	0.227351	0.00499282	0.492055	0.0149043	0	0	0.770678	0.00996084	0.0440626	0	5.87645	1.92734	0	2.44765	0	0	0.00499282	0	1.05674	0	0
GABA.CGE.VIP.CALB2	4	3.63214	2.10028	0.228966	0	0	0.00596587	1.00842	0	2.10685	0	0	1.81871	0	0	0	0	0.00596587	0.97738	0.118367	0	1.3031	1.1525	5.90381	3.11376	0	1.61839	0	0	0.00596587	0.204882	0.627872	0	0
GABA.CGE.VIP.CALB2	4	3.99871	2.7376	0.631672	0	0	0	0	0	0.490443	0	0	1.98676	0.0109492	0	0	0	2.1075	0	0	0	1.47072	0	4.95956	0	0	1.4631	0	2.69427	0	0	0	0	0
GABA.CGE.VIP.CALB2	4	3.59062	2.63324	0.168409	0	0	0.00986581	0	0	1.06936	0	0	1.53869	0	0	0	0.00494507	0	0	0	0	0.570066	0.917118	5.7619	3.37543	0.00494507	1.50184	0	1.49631	0.00494507	0.33403	0	0	0
GABA.CGE.VIP.CALB2	4	3.90898	2.06565	0.607074	0	0.00949822	0.0511579	0.357294	0	2.15359	0	0.0328564	0.971338	0.564578	0	0.0235785	0	0.270151	0.16259	0	0	1.1435	0	5.37843	0	0.00476039	2.35957	0	3.24699	0	0	0.913709	0	0
GABA.CGE.VIP.CALB2	4	3.55025	1.09789	0.114293	0	0	0	0.244887	0	1.86308	0	0	0.974455	0	0	0	0	0	0.690078	0	0	1.78495	1.63744	5.68031	1.38295	0.149661	2.55849	0	3.45214	0.0100395	0	0	0.0961285	0
GABA.CGE.VIP.CALB2	4	3.54651	1.96968	0.265329	0	0	0	0.644745	0	0.0120811	0	0	0.436283	0.29291	0	0	0.0120811	0.0060588	0	0	0	0.750568	0.741924	5.48573	2.49346	0.0060588	1.50822	0	2.33314	0	0	0	0	0
GABA.CGE.VIP.CALB2	4	2.90403	2.07207	0.494201	0	0	0	0.454761	0	2.23103	0	0.00526864	1.92161	0	0	0	0	0	0.00526864	0.310785	0	1.46144	0	5.26806	3.33142	0	0.310785	0	0	0	0	0	0	0
GABA.CGE.VIP.CALB2	4	3.3842	1.58469	0.910212	0	0	0.0242466	0.0182399	0	0	0	0	0.6034	0.281559	0	0	0	0	0	1.13089	0	2.02519	2.36397	5.34516	1.08842	0	1.31816	0	1.60091	0	0	0.6034	0	0
GABA.CGE.VIP.CALB2	4	3.93437	2.39203	0.596633	0	0	0.0203203	0.303145	0	1.23481	0	0	2.42253	0.035294	0.00511891	0	0	0	0	0	0	0.706264	0.955971	5.5492	0.0102118	2.03217	2.02542	0	2.47701	0	0	1.77427	0	0
GABA.CGE.VIP.CALB2	4	4.01098	2.3697	0.369889	0	0	0	0	0	2.03531	0	0	2.5819	0	0	0.00490634	0	1.09593	0.373281	0.583255	0	1.56388	0.988429	4.21586	0	0.00490634	2.56917	0	1.83774	0	0	0	0	0
GABA.CGE.VIP.CALB2	4	3.32667	0.0516406	0.312006	0	0	0	0.422096	0	1.6005	0	0	2.161	0	0.00480636	0	0	0	0.00480636	0	0	1.04226	0.192263	5.77915	0.32253	0	2.19965	0	1.33985	0	0	1.16521	0	0
GABA.CGE.VIP.CALB2	4	3.79084	1.25504	0.321125	0	0	0	0.216808	0	0.00618864	0	0.907235	2.673	1.10238	0	0	0	0	0	0.591678	0	1.33656	0.338975	5.80066	3.67412	0	1.8398	0	0.674073	0	0	0.741359	0	0
GABA.CGE.VIP.CALB2	4	3.40796	1.38479	0.47977	0	0	0	0.156163	0	1.22094	0	0	2.22415	0	0	0	0	0	0	0.295702	0	0.971489	0	5.66955	1.55402	0	1.88641	0	0.186674	0	0	0	0	0
GABA.CGE.VIP.CALB2	4	3.93078	1.95119	0.316897	0	0	0.0163159	0	0	1.24342	0	0	1.1747	0.678305	0	0.0533819	0	0.569653	1.48152	0.554022	0	0.606201	0.505606	4.49184	0	2.25061	2.08381	0	2.75125	0	0	0	0	0
GABA.CGE.VIP.CALB2	4	3.37732	1.24736	0.457973	0	0	0.00826384	0.00826384	0	1.81426	0	0	2.11653	0	0.00414046	0	0	0	0.00414046	0	0	1.32969	0.709567	5.80676	1.9785	0	2.63154	0	2.29292	0	0	1.14583	0	0
GABA.CGE.VIP.CALB2	4	3.4098	0.172012	0.435926	0	0	0.00416227	1.09651	0	0.910215	0	0	2.64595	0.608874	0	0	0	0	0.00416227	0.712247	0	1.2863	1.23304	5.93198	3.53602	0	1.66697	0	0.921897	0	0	0	0	0
GABA.CGE.VIP.CALB2	4	4.02372	2.07714	0.195076	0	0	0	0.401564	0	1.08439	0	0.0063154	4.06783	0	0	0.919415	0	0	0.388763	0	0	1.00414	1.49211	6.11142	2.78101	2.87607	2.96419	0	2.73398	0	0	0.891233	0	0
GABA.CGE.VIP.CALB2	4	3.42422	2.22974	0.434319	0	0	0.0165132	0	0	1.11993	0	0	0.0110391	0	0.00553477	0	0	0	0.375081	0	0	1.49339	1.30461	0.0696674	3.35363	0.00553477	2.17703	0	2.50734	0	0	0	0	0
GABA.CGE.VIP.CALB2	4	4.0053	1.87776	0.408181	0	0	0	0.673022	0	1.38941	0	0.0119304	2.23509	0	0.00598301	0	0	0	0	0	0.00598301	0.638765	1.01025	6.05504	0.909159	0.00598301	1.0425	0	0.185676	0	0	0	0	0
GABA.CGE.VIP.CALB2	4	2.76609	2.34737	0.268816	0	0	0.00512707	0.826392	0	2.07247	0	0	2.325	0	0	0	0	0	0.714648	0.00512707	0	1.33942	0.780358	5.90671	2.05682	0	2.12968	0	0	0	0	0.0646851	0	0
GABA.CGE.VIP.CALB2	4	3.91963	1.88444	0.336124	0	0	0.0310533	0.635725	0	2.23906	0	0.00524298	2.17068	0	0.00524298	0	0	0	0.0904087	0	0	0.489077	0	5.88669	2.47719	0	1.40363	0	0.00524298	0	0	0	0	0
GABA.CGE.VIP.CALB2	4	4.21064	2.12097	0.531789	0	0	0.0134092	1.07053	0	1.73613	0	0	2.59403	0	0	0	0	0.895659	0	0.231898	0	1.01828	1.32758	5.88463	2.32039	0.180648	2.76682	0	2.33966	0	0	1.71934	0	0
GABA.CGE.VIP.CALB2	4	3.12023	0.915418	0.50624	0	0	0	0.457864	0	0.434262	0	0	2.77267	0.0881698	0.00459809	0	0	0	0.638735	0	0	0.624028	1.90568	6.02684	4.28357	0	2.32364	0	0	0	0	0	0	0
GABA.CGE.VIP.CALB2	4	4.24445	2.16502	0.241524	0	0	0	0.295811	0	1.99529	0	0	2.68843	0.0686196	0	0	0	1.28266	0	0.219833	0	0.40724	0	5.81375	3.14577	0	2.13188	0	0.92166	0	0	0	0	0
GABA.CGE.VIP.CALB2	4	3.33605	0.92629	0.36657	0	0	0	0.187831	0	1.18267	0	0	2.92305	0.613128	0	0	0	0	0.00490769	0.5327	0	0.947495	0.644605	5.85459	4.16917	0	2.34621	0	0	0	0	0	0	0
GABA.CGE.VIP.CALB2	4	3.8619	1.86597	0.312198	0	0	0	0.21856	0	0.787087	0	0	1.82112	0	0	0	0	0	0	0.674207	0	0.684116	0	5.77143	0	0	2.25807	0	2.04289	0	0	0	0	0
GABA.CGE.VIP.CALB2	4	3.90969	1.27201	0.578607	0	0	0	0.00504244	0	2.17592	0	0	2.54737	0	0	0	0.00504244	0.92289	0.00504244	0.00504244	0	0	0	5.35974	1.40947	0	1.33913	0	0.821499	0	0	0	0	0
GABA.CGE.VIP.CALB2	4	4.44763	2.1922	0.427282	0	0	0.00516223	0.0651158	0	2.42108	0	0	2.25817	0	0.010298	0	0	0	0	0.0255487	0	1.34314	0.614534	5.97812	0.305361	0.00516223	2.74596	0	2.86455	0	0	0	0	0
GABA.CGE.VIP.CALB2	4	3.52702	2.36439	0.170474	0	0	0	0.0601122	0	2.35725	0	0	0.9857	0	0	0	0	0	0	0	0	1.12011	0.709313	5.67781	0.316076	0	2.76178	0	0	0	0	0	0	0
GABA.CGE.VIP.CALB2	4	3.15501	1.99662	0.452384	0	0	0.069066	0.577218	0	2.86825	0	0.00548546	1.22001	0	0.00548546	0	0	0	0.699178	0	0	0.657308	0.903669	5.59355	2.00554	0	1.82866	0	0	0	0	0	0	0
GABA.CGE.VIP.CALB2	4	2.8677	2.28968	0.326396	0	0	0.0320961	0.657301	0	2.66458	0	0	1.40532	0	0	0	0	0	0.979623	0.112967	0	0.578186	0	5.87638	3.75204	0	1.29252	0	0	0	0	0	0	0
GABA.CGE.VIP.CALB2	4	3.47013	0.988911	0.523558	0	0	0.0414681	0.774561	0	0.975034	0	0	1.7742	0	0	0	0	0	0.0105293	0.00527853	0	1.4811	0	5.86483	3.82257	2.22359	2.02742	0	0	0	0	0.946689	0.00527853	0
GABA.CGE.VIP.CALB2	4	3.24369	1.74181	0.252827	0	0	0.0110031	0.436744	0	3.03143	0	0	1.24972	0	0	0	0.286618	0	0	0	0	0.307172	1.7103	5.81341	2.28814	0	2.20631	0	0	0	0.485574	0.726418	0	0
GABA.CGE.VIP.CALB2	4	3.33146	1.53087	0.366613	0	0	0.0279917	0.50938	0	2.90964	0.00566137	0	1.64234	0	0	0.00566137	0.591223	0	0.0279917	0	0	0.0973025	1.16758	5.60595	0.594361	0	2.05432	0	0.00566137	0	0	0	0	0
GABA.CGE.VIP.CALB2	4	3.66724	2.23091	0.303325	0	0	0.0672897	0	0	3.02699	0	0	1.98387	0	0	0	0	0	0.769172	0	0	0.405393	0	5.95051	1.65019	0.00630782	2.23023	0	0	0	0	0	0	0
GABA.CGE.VIP.CALB2	4	3.59238	1.9122	0.349037	0	0	0.0182603	0.374702	0	1.87992	0	0	2.25015	0	0	0	0.00612388	0.115873	0	0	0	0.399725	0	5.46331	0	0	2.02859	0	1.78562	0	0.00612388	0.630421	0	0
GABA.CGE.VIP.CALB2	4	3.50052	2.5551	0.180945	0	0	0	0.0763496	0	1.69225	0	0	1.82859	0.587267	0	0	0	0.703139	0	0.473985	0	1.36428	0	5.65395	0	1.67223	2.43155	0	2.23331	0	0	0.548734	0	0
GABA.CGE.VIP.CALB2	4	3.9354	0.872025	0.272626	0	0	0	0.525061	0	1.68412	0	0	2.56739	0	0	0	0	0.147869	0.00529796	0.00529796	0	0.898328	0.591904	5.95453	2.50473	0	1.79241	0	2.20134	0.00529796	0.00529796	1.08164	0	0
GABA.CGE.VIP.CALB2	4	3.31606	0.860142	0.477233	0	0	0	0.803991	0	0.423595	0	0.339325	2.8231	0.59222	0	0	0	0	0	0.0221962	0	1.53264	0.9245	5.66752	4.00797	0.00559541	1.77374	0	0.00559541	0	0	0.315053	0	0
GABA.CGE.VIP.CALB2	4	4.38654	1.09968	0.476727	0	0	0	0.305394	0	0.492667	0	0	2.28498	0	0	0	0	0.597651	0.684854	0.0795683	0	0.845992	1.17916	6.18411	3.2031	0	2.23474	0	3.17516	0	0	0.666417	0	0
GABA.CGE.VIP.CALB2	4	3.58101	1.95701	0.472135	0	0	0.00626588	0.53665	0	1.40454	0	0	1.55203	0	0	0	0.00626588	0.00626588	0.390488	0	0	1.63012	0	5.46145	0	0	2.28939	0	2.89885	0	0.368991	0.982811	0	0
GABA.CGE.VIP.CALB2	4	3.70302	1.83536	0.805798	0	0	0.0152992	0.649576	0	2.07742	0	0	0.828496	0	0	0	0.00512577	0	0	0.414685	0	0.942884	0.48037	5.45052	0	1.55193	2.70589	0	3.23271	0	0.355246	0.61684	0	0
GABA.CGE.VIP.CALB2	4	3.64322	1.66016	0.348121	0	0	0.00532431	0.33293	0	0.573284	0	0.313611	2.02371	0.143942	0	0	0	0.968346	0	0	0	0.52394	1.64893	5.53886	1.32015	0	2.10368	0	0	0	0	0	0	0
GABA.CGE.VIP.CALB2	4	3.91614	2.06535	0.406176	0	0	0.0312206	0.384823	0	2.04587	0	0	2.15673	0.00632259	0	0	0	0.00632259	0	0	0	0.849421	0.819129	5.14156	0.00632259	0.611703	1.58938	0	3.02338	0.0126055	0	1.18693	0.371788	0
GABA.CGE.VIP.CALB2	4	3.13338	1.67821	0.62894	0	0	0.016489	0	0	1.90167	0	0	1.49224	0	0	0	0	0.00552661	0	0	0	1.38306	1.16838	5.8226	0	0	1.13153	0	0	0	0	0	0	0
GABA.CGE.VIP.CALB2	4	3.09355	0.771398	0.0839015	0	0	0.00623209	0	0	1.50009	0	0.645256	1.18075	0	0	0	0	0	0	0.0839015	0	1.7982	0.972353	5.21348	0.552553	0	1.98035	0	0.835763	0	0	0	0	0
GABA.CGE.VIP.CALB2	4	3.6206	1.72021	0.414226	0	0	0.0431995	0.597024	0	2.3293	0	0.0055031	2.22401	0	0	0	0	0	0	0.44652	0	0.265057	0	6.06633	0.997194	0	1.5929	0	0.0109761	0	0	0	0	0
GABA.CGE.VIP.CALB2	4	3.4361	1.98136	0.405755	0	0	0.00560712	0.323788	0	2.51204	0	0	1.66693	0.174942	0	0	0	0	0.363659	0	0	0.402	0.63871	5.75012	2.67689	0	2.10654	0	0	0	0	0.202871	0	0
GABA.CGE.VIP.CALB2	4	3.47809	1.82434	0.516588	0	0	0	0.502456	0	0.990911	0	0	2.37823	0.275787	0	0	0.00586364	0.00586364	0	0	0	1.30017	0.480876	5.6386	0	1.10431	2.2929	0	2.55151	0	0	0.393548	0.0899264	0
GABA.CGE.VIP.CALB2	4	4.44721	1.95281	0.803114	0	0	0	0.107892	0	0.27844	0.00516513	0	2.48007	0	0	0.00516513	0.00516513	0.196797	0.403554	0.0748082	0	0.848462	1.2139	6.10095	3.46617	0	2.6415	0	3.57373	0	0	1.2246	0	0
GABA.CGE.VIP.CALB2	4	4.42557	1.79838	0.515957	0	0	0.0289356	0.940352	0	1.0625	0.00488112	0	2.19069	0	0	0	0	0.57273	0.915199	0.699557	0	1.16983	0.909304	6.14767	2.61971	3.80259	3.12239	0	3.4504	0	0	0.518873	0	0
GABA.CGE.VIP.CALB2	4	3.68303	1.84959	0.242554	0	0	0.00881588	0.351083	0	1.67998	0	0	1.41295	0	0	0	0	0	0	0	0	0.581143	0.0642992	5.40584	0.00441765	0	2.33019	0	1.72199	0	0	0	0	0
GABA.CGE.VIP.CALB2	4	3.33066	1.46036	0.0562457	0	0	0.00480988	0.0191022	0	1.04444	0	0	2.31139	0	0	0	0.00480988	0.425504	0	0.665266	0	1.87792	0	5.37899	3.74366	0	0.637619	0	0.00480988	0	0	1.10372	0	0
GABA.CGE.VIP.CALB2	4	3.7254	1.79975	0.706772	0	0	0	0.686293	0	2.20635	0.00682622	0	1.72938	0	0	0	0	0	0.492872	0	0	0.636812	1.16702	5.2743	2.19192	0	2.67324	0	3.46919	0	0	0	0	0
GABA.CGE.VIP.CALB2	4	3.31491	2.14218	0.220038	0	0	0.00557815	1.13064	0	1.52779	0	0.125971	1.88016	0	0	0	0	0.0491174	0.00557815	0.106048	0	1.47161	0.523562	5.58292	0.00557815	0	1.49822	0	0.00557815	0	0	0	0	0
GABA.CGE.VIP.CALB2	4	4.20617	2.02544	0.171695	0	0	0.0116392	0.545719	0	2.01301	0	0	2.23446	0	0	0	0	0.146736	0	0	0	0.761486	1.04928	5.57185	0.636445	1.97962	2.83033	0	3.5374	0	0	0	0	0
GABA.CGE.VIP.CALB2	4	3.18253	1.78011	0.410891	0	0	0.0136406	0	0	1.40354	0	0.0980387	1.8353	0.00684356	0	0.619705	0	0.264016	0.00684356	0.875833	0	1.73026	0	5.51851	0.0791849	0.00684356	1.58653	0	0	0	0	0	0	0
GABA.CGE.VIP.CALB2	4	3.14058	1.06384	0.653015	0	0	0.00546909	0.0841069	0	1.168	0	0	2.21368	0	0	0	0	0	0	0.830402	0	0.618163	0	5.74811	4.44664	0	0.737801	0	0	0	0	1.05242	0.412122	0
GABA.CGE.VIP.CALB2	4	3.68927	1.22363	0.285905	0	0	0.00634456	0.647185	0	1.60757	0	0.0853574	0.00634456	0	0	0	0	0	0	0.0126491	0	1.4217	0.727198	5.4641	0.00634456	0.00634456	2.32832	0	2.82651	0.00634456	0	0	0	0
GABA.CGE.VIP.CALB2	4	3.8863	1.91932	0.507011	0	0	0.0163733	0.803167	0	1.31327	0	0	1.11956	0	0	0	0	0	0	1.89066	0	1.25539	0.812978	5.52547	0.0054876	0	1.62482	0	2.43072	0	0	0	0	0
GABA.CGE.VIP.CALB2	4	3.90151	1.55277	0.798459	0	0.00580272	0	0	0	1.39282	0	0	1.7945	0	0	0	0.00580272	0	0.011572	0.246345	0	1.03728	0.130739	5.99803	2.3517	0.00580272	2.00405	0	3.13059	0	0	0.083692	0	0
GABA.CGE.VIP.CALB2	4	2.59008	0.909476	0.212298	0	0	0	0.74473	0	2.33347	0	0	0	0	0	0	0	0	0.738641	0	0	2.43252	0	4.61918	0	0.547385	2.1775	0	3.10139	0	0	1.27249	0	0
GABA.CGE.VIP.CALB2	4	2.62073	1.06231	0.842765	0	0	0	0.0952587	0	0.152389	0	0	1.28216	0	0	0	0	0	0	0.681033	0	1.87764	0.00586181	4.99135	1.48384	0	2.79782	0	1.32993	0	0	0.230061	0	0
GABA.CGE.VIP.CALB2	4	3.30695	1.71354	0.739856	0	0	0.749317	0.493146	0	2.10954	0	0	1.82657	0.112903	0	0	0	0	0	1.07805	0	0.00661826	0.0888923	5.35968	1.63902	0	1.69542	0	0.286689	0	0	1.02468	0	0
GABA.CGE.VIP.CALB2	4	3.16381	0.953155	0.517169	0	0	0.010133	1.07673	0	1.58103	0	0	1.43823	0	0	0.218677	0.00507935	0	2.12143	0	0.00507935	0.849838	1.0048	5.99463	3.71158	2.04537	2.37554	0	0.010133	0	0	0.838894	0	0
GABA.CGE.VIP.CALB2	4	3.70894	2.38072	0.285517	0	0	0.00558521	0.451894	0	2.23786	0	0	2.86124	0	0	0	0	0	0	0	0	1.49544	0	5.36953	0.00558521	0	1.29143	0	0.842341	0	0	0	0	0
GABA.CGE.VIP.CALB2	4	3.78063	2.28752	0.236126	0	0	0.00510873	0.228004	0	2.39489	0	0	2.16487	0	0	0	0	0	0	0	0.00510873	0.833317	0.575778	5.22825	0	0.00510873	1.8656	0	0.0152486	0	0.58438	0	0.543587	0
GABA.CGE.VIP.CALB2	4	4.10933	2.77304	0.361522	0	0	0.0152541	0.106808	0	1.47976	0	0	2.80051	0	0	0	0	0.546711	0.156218	0.182174	0	0.0692755	0.787975	5.35013	0.00511059	0.00511059	1.63704	0	0.879216	0	0	0	0	0
GABA.CGE.VIP.CALB2	4	4.11745	1.93322	0.326494	0	0	0.00630955	0.270138	0	1.10286	0	0	2.56598	0.146899	0	0	0	0	0.00630955	0.00630955	0	0.965721	0.00630955	6.3381	2.38579	0	2.32269	0	3.80742	0	0.478692	0	0.812369	0
GABA.CGE.VIP.CALB2	4	3.39765	2.45441	0.205378	0	0	0.00505365	0.0200631	0	2.52903	0	0	1.59668	0	0	0	0.00505365	0	0	0	0	0.119258	2.04291	5.95388	2.39984	0.00505365	2.40214	0	3.37208	0	0.00505365	0	0	0
GABA.CGE.VIP.CALB2	4	4.034	1.69816	0.386889	0	0	0	0	0	2.36855	0	0	1.6181	0.152453	0	0.0831249	0	0.313627	0.0086304	0	0	1.08775	1.00401	5.81471	1.13063	1.62239	2.77554	0	3.64096	0	0	0.642615	0.00432451	0
GABA.CGE.VIP.CALB2	4	3.29264	1.6353	0.378824	0	0	0	0.719166	0	0.902715	0	0.401098	1.84223	0	0	0	0	0.730549	0.00468864	1.13467	0	1.28714	0.16032	5.26556	0	0	1.78001	0	0.00468864	0	0	0	0	0
GABA.CGE.VIP.CALB2	4	2.89709	0.162645	0.750748	0	0	0.0106473	0.790373	0	1.37887	0	0	2.61155	0	0	0	0	0	0.874173	0	0	1.0271	0.91143	5.81545	3.29546	0.00533781	1.77628	0	0.0264086	0	0	1.26627	0	0
GABA.CGE.VIP.CALB2	4	3.47074	2.24433	0.645766	0	0	0	0.0288522	0	2.27414	0	0	1.50365	0	0	0	0	0	0	0	0	1.4476	1.21197	5.84559	0.0109174	0.00365238	1.32705	0	0.00729147	0	0	0	0	0
GABA.CGE.VIP.CALB2	4	4.02831	1.94324	0.0429636	0	0	0.00547248	0.716917	0	0.557498	0	0	2.09871	0	0	0	0	0.444508	0.597536	0	0	1.25498	2.24493	6.45956	1.52243	4.39312	3.03278	0	4.10853	0	0	0.576177	0	0
GABA.CGE.VIP.CALB2	4	3.63915	1.14233	0.248092	0	0	0.0147112	0.804237	0	1.93414	0	0	0.978262	0	0	0.878751	0	0	0	0.371244	0	1.37225	1.53381	5.77462	0	0.0049278	2.27662	0	1.98902	0	0	0	0	0
GABA.CGE.VIP.CALB2	4	3.15995	1.15599	0.359008	0	0	0.00439754	0.579131	0	1.12786	0	0.398241	3.2026	0	0	0	0	0	0	0.0346505	0	0.63438	0.00439754	5.50704	2.80657	0	1.47511	0	0.00439754	0	0	0	0	0
GABA.CGE.VIP.CALB2	4	4.12592	2.78358	0.294137	0	0	0.0214799	0	0	1.4612	0	0	1.79615	0	0	0	0	0.257054	1.07211	0.589648	0	1.21552	1.20256	5.74184	1.03037	0	2.77346	0	3.58397	0	0.0214799	0	0	0
GABA.CGE.VIP.CALB2	4	3.36928	1.74645	0.423047	0	0	0	0.056311	0	1.39978	0	0	0.981832	0	0	0	0.258433	1.02621	0	0.384364	0	1.41012	2.9579	5.52214	0.00525224	0	1.15527	0	0.993599	0	0	0	0	0
GABA.CGE.VIP.CALB2	4	2.95477	2.66983	0.453844	0	0	0	0.798691	0	0	0	0.00567054	0	0	0	0	0	0.0553084	0.0113091	0	0	1.39119	1.05066	5.94147	0	0	1.69297	0	1.53091	0	0	0	0	0
GABA.CGE.VIP.CALB2	4	4.04239	1.86929	0.475798	0	0	0	0.585108	0	1.32508	0	0	2.41758	0	0	0	0.00515025	0	0.356676	0	0.00515025	1.12355	1.62515	5.68952	1.25252	0	2.01295	0	3.37003	0	0	0.183469	0	0
GABA.CGE.VIP.CALB2	4	3.91397	0.783944	0.0919991	0	0	0.00959025	0.283401	0	0.779535	0	0	2.04024	0	0	0	0	0.350081	0.00480662	0	0	0.366914	2.08075	5.88487	2.75919	0.00959025	2.91671	0	4.01392	0	0	1.45872	0	0
GABA.CGE.VIP.CALB2	4	3.33494	2.16732	0.381883	0	0	0.231899	0.00944587	0	2.66761	0	0	2.37638	0	0	0	0.103587	0	0.26884	0.141369	0.00944587	0.9497	0.958837	5.68855	1.5767	0.0949933	1.04922	0	0.00473409	0.0992993	0	0	0.0141356	0
GABA.CGE.VIP.CALB2	4	3.0504	1.32199	0.2281	0	0	0	0.696573	0	0.895012	0	0	1.76721	0	0	0	0	0	0.731782	0.0396574	0	0.790564	0.916812	5.84489	3.99371	2.24559	2.41381	0	0	0	0	0.810747	0	0
GABA.CGE.VIP.CALB2	4	3.07121	2.22598	0.400263	0	0	0	0.133975	0	2.87151	0	0	1.88501	0.240898	0.00476742	0	0.00476742	0	0	0	0	0.849323	0	5.76141	2.0356	0	1.35871	0	0	0	0	1.17153	0	0.00476742
GABA.CGE.VIP.CALB2	4	3.52898	2.51867	0.246407	0	0	0.0145993	0.34485	0	2.00837	0	0	1.4165	0	0	0	0.00489014	0.745682	0	0.702919	0	1.05863	1.56332	5.44939	0	0	2.44493	0	1.93961	0	0.797789	0.261617	0	0
GABA.CGE.VIP.CALB2	4	3.14431	1.90616	0.461797	0	0	0	0.616259	0	2.0936	0	0	1.74876	0.132779	0	0	0	0	0.798038	0	0	0.867987	1.31034	5.99939	3.97189	0.00942198	1.40294	0	0	0	0	0	0.00472209	0
GABA.CGE.VIP.CALB2	4	3.66934	2.14024	0.811423	0	0	0	0.934442	0	2.3807	0	0	2.28493	0	0	0	0	0	0	0	0	0.673759	1.24896	5.88214	1.34771	0	1.6949	0	0	0	0	1.54461	0	0
GABA.CGE.VIP.CALB2	4	3.77976	0.887469	0.570667	0	0	0	0.193967	0	1.20861	0	0	1.41964	0	0	0	0	0	0	0	0	0.810765	1.2722	5.46613	0.784712	0	1.48725	0	3.07757	0	0	1.37531	0	0
GABA.CGE.VIP.CALB2	4	2.61845	1.23706	0.817762	0	0	0	0.344841	0	1.56679	0	0	0.667352	0	0	0	0	0	0.00500896	0.348391	0	1.10481	0.00500896	5.26704	2.72564	0.00999296	1.45842	0	0.00500896	0	0	0.79987	0	0
GABA.CGE.VIP.CALB2	4	3.16697	0.815846	0.215869	0	0	0	0.147486	0	0.827119	0	0	2.07785	0	0	0	0	0	0	0.423971	0	1.68611	0	5.50345	3.68287	0.00511328	1.1929	0	0.0102005	0	0	1.33474	0.653755	0
GABA.CGE.VIP.CALB2	4	3.58155	1.27866	0.262105	0	0	0	0.439552	0	1.2654	0	0	0.881369	0	0	0	0	0	0.00524348	0.495541	0	1.26392	0.0411977	5.09202	2.37902	0	3.05244	0	3.85474	0	0	0.0259467	0	0
GABA.CGE.VIP.CALB2	4	3.9726	2.53269	0.206444	0	0.0050826	0	0.451522	0	0.387902	0	0	2.40872	0	0	0	0	0.742241	0.0050826	0	0	0.884452	0.0399554	5.8744	2.41648	0	2.05771	0	3.32219	0.231011	0	1.38151	0	0
GABA.CGE.VIP.CALB2	4	3.31083	2.21734	0.308715	0	0	0	0.447959	0	2.14195	0	0	1.86897	0	0	0	0	0.721134	0	0	0	0.800341	0.537689	5.47693	0.521047	0	2.20121	0	2.43345	0	0	1.30867	0	0
GABA.CGE.VIP.CALB2	4	4.00338	2.00077	0.413659	0	0	0.00630527	1.04625	0	0.683301	0	0	2.22783	0	0	0.0672634	0	0.774801	0	0	0	0.084849	0	5.9092	2.86017	1.85657	2.16597	0	2.62253	0	0	1.39997	0	0
GABA.CGE.VIP.CALB2	4	3.77455	1.36917	0.201335	0	0	0	0.178845	0	0.0161879	0	0	1.43606	0	0	0	0	0.00542513	1.2719	0.699038	0	0.448363	1.85658	5.13317	0	2.26633	2.52833	0	3.80879	0	0	0.468994	0	0
GABA.CGE.VIP.CALB2	4	3.18724	1.20365	0.87613	0	0	0	0.560331	0	0	0	0	0.9907	0	0	0.106274	0	0	0	1.47335	0	0.224971	0	5.06798	0.00559069	0.00559069	2.08532	0	1.68033	0.00559069	0	0	0	0
GABA.CGE.VIP.CALB2	4	3.79474	2.33707	0.802662	0	0	0.00520454	0.315165	0	2.13988	0	0	2.56668	0	0.00520454	0	0	1.1016	0	0	0	1.05364	0.719817	5.24645	0	0	2.23861	0	2.27681	0	0.495809	0.892079	0	0
GABA.CGE.VIP.CALB2	4	3.39779	1.29526	0.326232	0	0	0	0.245756	0	1.63939	0	0	0	0	0	0	0	0.0470907	1.90056	0.00534315	0	1.69991	1.32702	5.89525	2.68887	3.70264	2.73651	0.185303	0.00534315	0	0	1.42702	0	0
GABA.CGE.VIP.CALB2	4	3.00863	1.6518	0.511379	0	0	0	0.625065	0	2.08721	0	0	0.697593	0	0	0	0	0	0.980752	0	0	1.07585	1.62448	6.00382	3.13682	3.13376	2.59661	0	0	0	0.14027	0.526317	0	0
GABA.CGE.VIP.CALB2	4	3.41232	2.08253	0.494643	0	0	0.00950561	0.0824629	0	2.59753	0	0	2.15759	0	0	0	0	0	0.479976	0	0	0.0189217	0	5.66416	0.327008	0.00950561	1.54064	0	0.0047641	0	0	0	0	0
GABA.CGE.VIP.CALB2	4	3.00248	1.56539	0.711944	0	0	0.0053087	0.592812	0	1.53259	0	0.305003	0.7898	0	0	0	0	0	0	0.335908	0	1.92188	0	4.87112	2.6178	0.0053087	0.649991	0	0	0	0	0	0	0
GABA.CGE.VIP.CALB2	4	4.14055	1.94325	0.380149	0	0	0	0.163721	0	2.44887	0	0	1.90956	0.182423	0	0	0.00443728	0	0.377104	0	0	0.706699	0.851447	5.50115	2.79595	0	1.33778	0	2.13088	0	0	0.49764	0	0
GABA.CGE.VIP.CALB2	4	3.0612	0.875181	0.250273	0	0	0	0.0905643	0	1.763	0	0	2.08912	0.344132	0	0	0	0	0	0.798978	0	1.46168	0	5.28825	3.50547	0	1.08334	0	0	0	0	0.00450374	0	0
GABA.CGE.VIP.CALB2	4	4.10583	2.58246	0.48976	0	0	0	0.626413	0	2.19041	0	0	1.7469	0	0	0.227051	0	0	1.1775	0	0	0.898135	1.02207	5.35728	1.80358	0	1.93915	0	2.8682	0	0.0158053	1.01824	0	0
GABA.CGE.VIP.CALB2	4	3.73218	1.55438	0.273418	0	0	0	0	0	1.67144	0	0	1.12911	0.269489	0	0	0	0	0.366948	0	0	0.733584	0	4.82067	3.75657	0	1.20607	0	0	0	0	1.72336	0	0
GABA.CGE.VIP.CALB2	4	4.58015	2.37677	0.335673	0	0	0	0.0869887	0	1.31412	0	0	2.52467	0	0	0	0.00503642	0.600488	0	0.328428	0	1.50499	0.0635743	6.10722	2.62756	0	2.35353	0	3.5069	0	0	0	0	0
GABA.CGE.VIP.CALB2	4	3.61695	1.41732	0.464228	0	0	0	0	0	2.16852	0	0	1.71287	0	0	0	0.0184364	0	0.0138591	0.285391	0	0.690893	0	5.69994	0	1.40026	2.65665	0	3.32032	0	0.13877	0	0	0
GABA.CGE.VIP.CALB2	4	4.04285	2.25901	0.21035	0	0	0.0103511	0.738367	0	1.92693	0	0	2.42626	0	0	0	0	0	0.0103511	0.0103511	0	1.21868	0	5.68479	1.50204	0.00518897	2.14518	0	1.19849	0	0	0.630854	0	0
GABA.CGE.VIP.CALB2	4	3.30736	2.05519	0.29822	0	0	0.00468439	0.734592	0	2.02031	0	0.00468439	1.53852	0.273525	0	0	0.00468439	0	0.291226	0.237154	0	0.697889	0.502384	5.87103	2.88682	0.00468439	1.34443	0	0	0	0	0.422573	0.524859	0
GABA.CGE.VIP.CALB2	4	3.96259	2.61272	0.0733329	0	0	0.00542019	0.38719	0	2.23633	0	0	2.29825	0	0	0	0	0	0	0	0	0.112943	0	5.93611	1.82474	0	1.97274	0	2.06302	0	0	0	0	0
GABA.CGE.VIP.CALB2	4	3.29699	0.830102	0.296773	0	0	0.00420468	0	0	0.779228	0	0.0125614	0	0	0	0	0.0167137	0.17716	0	0.061286	0	1.46526	1.45745	5.18241	0	0	2.38117	0	2.38583	0	0	1.89277	0.484647	0
GABA.CGE.VIP.CALB2	4	3.47757	1.30591	0.166759	0	0.00441632	0.0131909	0.742935	0	1.42344	0	0	0	0	0	0	0	0	0	0.994749	0	1.57821	2.22942	5.42429	0	0.00441632	2.42515	0	2.04824	0	0	0	0	0
GABA.CGE.VIP.CALB2	4	3.38485	1.50555	0.32414	0	0	0.0161598	0.5546	0	0.43551	0	0.0399202	3.03543	1.57029	0.0040645	0.370186	0.0040645	0.0201593	0.800163	0.499302	0	0.0745346	1.66556	5.82073	3.56725	0	2.51108	0	1.3462	0	0.364545	1.07656	0	0
GABA.CGE.VIP.CALB2	4	3.94032	2.63495	0.295557	0	0	0.00991805	0.230439	0	2.60851	0	0	3.12166	0.177614	0	0	0	0.549625	0.610985	0.00991805	0	0.610985	0.523396	5.84762	0	0.181778	1.64217	0	2.251	0	0	0.276841	0.121842	0
GABA.CGE.VIP.CALB2	4	3.59851	3.07404	0.39777	0	0	0.00507565	0.110679	0	1.80557	0	0	3.32874	0.254679	0	0	0	0	0.418074	0.912663	0	1.26533	0.770197	5.77637	2.06365	0	1.74079	0	0.185269	0	0	0.242775	0	0
GABA.CGE.VIP.CALB2	4	3.88786	3.06839	0.0982638	0	0	0.00571993	0	0	2.46968	0	0	2.29744	0	0	0	0	0.592676	1.09736	0	0	0.86572	0.960081	5.8627	2.65963	0	1.47413	0	2.39983	0.00571993	0	0.0114073	0	0
GABA.CGE.VIP.CALB2	4	4.35569	2.93018	0.742721	0	0	0.00992027	0	0	0.160816	0	0	1.31418	0	0	0.433952	0.575282	0.837684	1.428	0.945929	0	0.414383	0.202383	4.38183	0	2.64122	2.4817	0	0.564002	0	0.210493	0.73079	0	0
GABA.CGE.VIP.CALB2	4	3.88197	2.40384	0.53542	0	0	0.0472857	0.0644569	0	2.265	0	0	2.16738	0.583836	0	0.119654	0	0.765473	0	0	0	1.22107	0	5.33525	0	3.1669	2.13713	0	3.05903	0	0.499343	0	0	0
GABA.CGE.VIP.CALB2	4	3.89707	2.0201	0.354116	0	0	0	0.555959	0	2.45906	0	0	2.74845	0	0	0	0	0	0.42602	0	0	0.00588433	0.510959	5.9006	0.448883	0	2.01618	0	1.31549	0	0	0.307486	0	0
GABA.CGE.VIP.CALB2	4	3.48675	1.53224	0.942739	0	0	0.0235532	1.26865	0	1.55263	0	0	0.672571	0	0	0	0	0	1.89795	0.035125	0	0.0964815	2.00858	6.00946	3.66237	3.45055	2.79303	0	0	0	0	0.256154	0	0
GABA.CGE.VIP.CALB2	4	3.51101	1.93744	0.499163	0	0	0	0.433684	0	2.234	0	0	1.43139	0.0802224	0	0	0	0	0.18097	0.0409154	0	0.800573	0.595754	5.8108	2.7845	0	1.55779	0	0	0	0	1.18347	0.473484	0
GABA.CGE.VIP.CALB2	4	3.65357	2.46044	0.334629	0	0	0.0251567	0.532469	0	2.06024	0	0	1.58148	0	0	0	0	0	0	0	0	1.42036	1.24007	5.82766	0.349108	0.0101387	2.50512	0	0.976793	0	0	0.366917	0	0
GABA.CGE.VIP.CALB2	4	3.78043	3.20405	0.610588	0	0	0.0125749	1.33077	0	1.93839	0	0	2.89464	0	0	0	0	0	0	1.33411	0	0.923672	0.520776	5.67876	2.80919	0.00630723	2.08705	0	0.955809	0	0	0.664103	0	0
GABA.CGE.VIP.CALB2	4	2.49078	2.48061	1.11195	0	0	0	0.17125	0	1.71852	0	0	1.24661	0	0	0	0	0	1.45971	0.00715843	0	1.46636	1.39062	5.90717	3.46572	3.48792	3.24365	0	0	0.00715843	0	0.0693779	0	0
GABA.CGE.VIP.CALB2	4	3.74697	2.83822	0.399805	0	0	0.0178772	0.84793	0	1.19797	0	0	2.02602	0	0	0	0	0	0.184758	0.277763	0	1.55854	0	6.2539	3.16741	0	2.90286	0	3.01176	0	0	1.18564	0	0
GABA.CGE.VIP.CALB2	4	3.8379	1.07228	0.647818	0	0	0	0	0	0.939944	0	0	2.38199	0	0	0.597678	0	0.0622825	0.958037	0	0	2.27502	0	5.80554	2.09091	0.0116164	2.96811	0	3.04078	0	0	0	0	0
GABA.CGE.VIP.CALB2	4	4.05427	2.48423	0.276348	0	0	0	0.473627	0	0.619163	0	0	2.84805	0	0	0.111614	0	1.09422	0	0.0353071	0	0.0353071	1.97434	6.02999	3.42943	0	2.25634	0	2.18906	0	0	1.70613	0	0
GABA.CGE.VIP.CALB2	4	3.88101	1.84147	0.520595	0	0	0	0.37023	0	0.546237	0	0	1.91173	0.622376	0	0	0	0	0.00544936	0.307955	0	1.49244	0.494279	5.79916	1.01504	0.00544936	2.22118	0	2.03613	0	0.351182	0.319931	0	0
GABA.CGE.VIP.CALB2	4	3.37139	1.48531	0.429684	0	0	0	0.82681	0	0.679504	0	0	2.50323	0.418709	0	0	0	0	1.46226	0.468926	0	0.699148	1.13576	6.27259	3.02165	0	1.53109	0	1.61235	0	0.0329978	0.644903	0	0
GABA.CGE.VIP.CALB2	4	4.14149	1.0209	0.089692	0	0	0	0.0492927	0	1.08633	0	0	1.93635	0	0	0	0.00719233	0	0	0	0	1.22698	0.999876	6.0836	2.85771	0	2.86883	0	3.17433	0.0143333	0	0.819962	0	0
GABA.CGE.VIP.CALB2	4	3.13476	2.09073	0.771128	0	0	0	0.423299	0	1.20271	0	0	2.49513	0	0	0.00469424	0	0	0.623674	0	0	1.09223	0.0414754	5.56885	4.04548	0	1.50319	0	0	0	0	0	0	0
GABA.CGE.VIP.CALB2	4	3.13296	0.403104	0.101726	0	0	0	0.403104	0	1.00887	0	0	2.67091	0	0	0	0	0	0	0.25622	0	2.00286	0.967189	5.29201	2.93591	0	1.27798	0	0.00485548	0	0	0.562144	0	0
GABA.CGE.VIP.CALB2	4	3.0284	2.49155	0.249771	0	0	0	0.464683	0	1.61254	0	0	2.39464	0	0	0	0	0	0	0.67141	0	1.14576	0.9542	5.1098	3.81481	0.00479749	1.12879	0	0	0	0	0	0	0.00479749
GABA.CGE.VIP.CALB2	4	2.71911	1.20727	0.355351	0	0	0	0.0189951	0	0.959673	0	0.00954267	1.75021	0	0.00478272	0	0	0.00478272	0	0.375313	0	0.619585	0.617002	5.49745	3.26971	0	1.19719	0	0.155118	0	0.00954267	0.908823	0	0
GABA.CGE.VIP.CALB2	4	3.07395	1.28257	0.238152	0	0	0	0	0	1.16776	0	0	1.86505	0	0	0	0	0	0	0.119663	0	0.815981	0	5.03106	3.02032	0	1.09359	0	0	0	0	1.07207	0.486005	0
GABA.CGE.VIP.CALB2	4	4.00945	1.25865	0.172658	0	0	0	0.561808	0	1.0057	0	0	1.51048	0	0	0.156674	0	0	0.00470044	0	0	1.41904	0	6.07842	2.4862	2.83156	1.75315	0	2.74794	0	0	1.78685	0	0
GABA.CGE.VIP.CALB2	4	2.92441	1.88979	0.0621345	0	0	0	0.470166	0	1.87112	0	0	1.76722	0	0	0.436841	0	0	0.00581086	0.855284	0	1.55264	0	5.37979	2.60014	0	1.3837	0	0	0	0	1.54273	0	0
GABA.CGE.VIP.CALB2	4	3.1091	0.306702	0.623248	0	0	0	0.239547	0	1.11632	0	0	3.06259	0	0	0	0	0	0	0.783265	0.00586695	1.40547	0.00586695	5.5498	3.29679	0	1.16337	0	0	0	0	0.81762	0.137241	0.00586695
GABA.CGE.VIP.CALB2	4	3.39021	2.39277	0.387952	0	0.00468169	0	0.28404	0	1.98109	0	0	2.25556	0	0	0	0	0.876762	0	0.135817	0	1.33169	0.00468169	5.30846	0.933693	0	0.328938	0	1.02697	0	0	0.786924	0	0
GABA.CGE.VIP.CALB2	4	3.72082	2.67971	0.501843	0	0	0	0.0200082	0	1.02914	0	0	2.58149	0.894043	0.00503971	0.00503971	0.0100541	0.357294	0	0.507942	0	0.851836	0.546704	5.65483	0	0	1.74025	0	2.4751	0	0	0.940476	0	0
GABA.CGE.VIP.CALB2	4	3.58882	1.16851	0.126339	0	0	0	0.576131	0	0.916519	0	0.00479799	2.78875	0.00479799	0.00479799	0	0	0	0.238492	0.0143255	0	1.00306	0.937455	5.55177	2.88161	0	1.21238	0	0	0	0	1.63912	0	0
GABA.CGE.VIP.CALB2	4	3.49769	1.26919	0.527578	0	0	0	0.606383	0	0.487299	0	0.00513363	2.88492	0	0	0.035394	0	0	0	0.245241	0.00513363	1.44272	0	5.68126	3.24045	0.010241	1.15597	0	0	0	0	0.742614	0	0
GABA.CGE.VIP.CALB2	4	3.17962	1.58193	0.32602	0	0	0	0.568686	0	1.13781	0	0	2.48449	0	0	0	0.00492941	0	0	0.0147159	0.00983463	0.474875	1.6276	5.66322	3.68848	0	1.83146	0	0	0	0	1.60601	0.297071	0
GABA.CGE.VIP.CALB2	4	2.8825	2.19506	0.199272	0	0	0	0	0	2.12796	0	0	1.29079	0	0	0	0	0.0207839	0	0.0709287	0	1.11952	0	5.26223	2.7647	0	0.954011	0	0.0104459	0	0	0	0	0
GABA.CGE.VIP.CALB2	4	3.16555	2.25252	0.498073	0	0	0	0.134054	0	2.26934	0	0	2.11605	0	0	0	0	0	0	0.794525	0	1.20511	0	5.00441	2.42945	0.00595949	1.93319	0	0.00595949	0	0	0	0.214378	0.00595949
GABA.CGE.VIP.CALB2	4	3.46593	2.95311	0.32981	0	0	0	0.781745	0	2.49664	0	0	1.97754	0	0	0	0	0	1.15882	0.0130838	0	0.757343	1.08597	5.48722	0.139116	0	1.94543	0	0.824991	0	0	0.923829	0	0
GABA.CGE.VIP.CALB2	4	2.97244	2.54881	0.314414	0	0	0	0.26053	0	2.88523	0	0	1.53098	0	0	0	0	0	0.957859	0	0	0.134249	1.00215	5.60927	2.91516	0	2.07419	0	0	0	0	0.913575	0	0
GABA.CGE.VIP.CALB2	4	4.09536	2.42445	0.361687	0	0	0	0.145332	0	1.97034	0	0	2.32358	1.22114	0	0	0	0.00557099	0.482491	0.00557099	0	1.04112	1.59593	5.21747	1.85402	1.85925	1.7824	0	1.747	0	0	0.915166	0.0437224	0
GABA.CGE.VIP.CALB2	4	3.51377	3.1034	0.0973075	0	0	0	0.85446	0	2.64295	0	0	1.79841	0.216764	0	0	0	0	0.717297	0.612202	0	1.01483	0.346547	5.46999	0.0625492	0	1.77771	0	0	0	0	0.638109	0	0
GABA.CGE.VIP.CALB2	4	2.82457	2.84835	0.336718	0	0	0	0.193522	0	2.44556	0	0	1.01191	0	0	0	0	0	0.903379	0.623123	0	0.420758	0.665165	5.39621	2.51569	0	1.70278	0	0.00532372	0	0	0.812888	0	0
GABA.CGE.VIP.CALB2	4	3.64161	2.82968	0.118495	0	0	0	0.553358	0	2.32231	0	0	1.9173	0	0	0	0	0	0.31256	0	0	0.0949398	1.22552	5.06226	0.203262	0	2.21213	0	0	0	0	1.1587	0	0
GABA.CGE.VIP.CALB2	4	2.97269	2.49815	0.392872	0	0	0	0.671274	0	3.1786	0	0	1.67032	0.0611121	0	0.529997	0	0	1.26515	1.11733	0	0.333106	0.29118	5.27025	2.71424	0	2.05855	0	0.118704	0	0	0	0	0
GABA.CGE.VIP.CALB2	4	3.19508	2.52114	0.323116	0	0	0	0.218822	0	2.65562	0	0	1.91573	0.0603319	0	0	0	0	0	0.658988	0	0.721352	0.626284	4.67846	0.178028	0	1.69612	0	0.00413736	0	0	0.167564	0	0.00413736
GABA.CGE.VIP.CALB2	4	3.90105	2.50211	0.334972	0	0	0	0.305765	0	2.2128	0	0	2.70134	0	0	0	0	0.0774001	0.219853	0.529124	0	0.999449	0.00446083	5.36903	0.00446083	0	1.87715	0	1.07547	0	0	0.491553	0	0
GABA.CGE.VIP.CALB2	4	2.81044	1.96477	0.116497	0	0	0	0.982249	0	2.38551	0	0	0.651932	0	0	0	0.00493	0	1.79118	0.107661	0	0.903337	1.60214	5.23182	2.91752	0	2.42301	0	0	0	0.300767	1.43804	0	0
GABA.CGE.VIP.CALB2	4	3.0329	0.860314	0.282595	0	0	0	0.880426	0	1.43013	0	0	1.37217	0	0	0	0	0	2.7423	0.59422	0	0.923299	1.26698	5.36985	2.26837	1.06698	2.49546	0	0.868407	0	0	1.83704	0	0
GABA.CGE.VIP.CALB2	4	3.67075	2.81062	0.328386	0	0	0	0.422388	0	1.78053	0	0	2.27379	0.263229	0	0	0	0	1.44485	0	0	1.23282	0.363253	5.32934	0.657909	0	2.02492	0	1.21023	0	0	1.17196	0.38584	0
GABA.CGE.VIP.CALB2	4	3.36764	0.994743	0.111111	0	0	0	0.00366575	0	1.02022	0	0	1.13516	0	0	0	0.00366575	0	0.915639	0.635909	0	1.71251	0	4.75855	3.16515	0	1.37903	0	0.00366575	0	0	2.18393	0.496331	0
GABA.CGE.VIP.CALB2	4	3.61289	2.51407	0.309353	0	0	0	0.406787	0	2.96559	0	0	1.57676	0.0888895	0.00463723	0	0	0	1.67197	0.443249	0	0.635395	0.419089	4.79261	0	0.00463723	1.22875	0	0	0	0	0.416027	0	0
GABA.CGE.VIP.CALB2	4	3.41026	3.05793	0.284526	0	0	0.00490039	0.68435	0	2.61226	0	0	1.96027	0.00490039	0	0.499829	0.00490039	0	1.22586	0	0	1.40852	0.133184	5.93265	2.94128	0	1.82808	0	0	0	0	0.158656	0	0
GABA.CGE.VIP.CALB2	4	3.19003	2.23442	0.210401	0	0.00556006	0.0165883	0.36109	0	2.44659	0	0	1.36365	0	0	0	0	0	0	0.561157	0	1.18456	0	6.15907	3.06056	0	1.28815	0	0.135373	0	0	0	0	0
GABA.CGE.VIP.CALB2	4	3.26242	2.68113	0.373332	0	0	0.0290881	0.714357	0	2.52935	0	0	1.51008	0	0	0	0	0	0.675067	0	0	0.943605	0.817237	6.23604	2.71492	0	1.06938	0	0	0	0	0	0	0
GABA.CGE.VIP.CALB2	4	3.55673	2.89679	0.105486	0	0	0.0110636	0.73195	0	2.33382	0	0.00554712	2.78619	0	0.00554712	0	0	0	0	0	0	1.37042	0.662723	5.90838	0	0.00554712	2.09912	0	0.903614	0	0.360382	0	0	0
GABA.CGE.VIP.CALB2	4	3.04751	2.0561	0.317118	0	0	0.0205194	0.753619	0	0.977765	0	0	1.76486	0	0.81969	0	0	0.153451	1.00659	0	0	1.34282	1.18164	6.03909	3.31738	3.64113	2.82214	0	0	0	0	1.20831	0	0
GABA.CGE.VIP.CALB2	4	3.8719	2.8339	0.56019	0	0	0.00489652	0.6765	0	2.08306	0	0	1.66118	0	0.00976918	0.00489652	0.00489652	0.942278	0.145893	0	0	1.33831	0.415677	5.84092	0.999891	1.2607	2.34744	0	2.0928	0	0	0.36587	0	0
GABA.CGE.VIP.CALB2	4	3.19837	2.31958	0.354897	0	0	0.0185536	0.0722341	0	2.39662	0	0	2.01091	0.00467076	0	0	0	0	0.742031	1.24336	0	0.512513	0.867561	6.21435	3.04742	0	2.05923	0	0	0	0	0.755317	0	0
GABA.CGE.VIP.CALB2	4	4.12068	2.66581	0.210055	0	0	0.0276633	0.236234	0	0.175357	0	0	0	0	0	0	0.018527	1.22188	0.9956	0.0231056	0	1.49712	0.660099	4.43175	0	0.00466403	2.65667	0	2.96313	0	0	0	0	0
GABA.CGE.VIP.CALB2	4	3.50348	2.38725	0.821412	0	0	0	0.245918	0	1.98302	0	0	2.49161	0	0	0	0	0	0	0	0	0.170471	1.00936	5.97015	1.79299	0	2.46036	0	4.11723	0	0	0	0	0
GABA.CGE.VIP.CALB2	4	4.03322	2.32141	0.45753	0	0	0.0193137	0.714579	1.00458	0.252816	0	0	1.96134	0.278974	0	0.00970347	0	0.448231	0.582108	0.00486351	0	0.406905	1.43582	5.8719	2.02381	2.26583	2.61314	0	3.88929	0	0.363797	0.951413	0	0
GABA.CGE.VIP.CALB2	4	3.15316	2.01828	0.802225	0	0	0.139024	0	0.599019	2.05238	0	0	1.78495	0	0	0	0	0.46788	0.170957	0	0	1.57705	1.54575	5.6789	0	2.78354	2.05238	0	3.8	0	0	0	0	0
GABA.CGE.VIP.CALB2	4	2.82561	2.08301	0.0115982	0	0	0.00581591	0.616049	0	2.80076	0	0	2.44481	0	0	0	0	0	0.209705	0.398749	0	1.70529	0.810144	5.98384	1.82877	0	1.84642	0	0	0	0.983587	1.15368	0	0
GABA.CGE.VIP.CALB2	4	3.46602	2.32046	0.0585283	0	0	0	0.0138138	0	2.5219	0	0	0.869755	0	0.00462582	0	0	0.591534	0.00462582	0	0.00462582	0.634235	1.34363	6.05238	1.38973	0	2.8723	0	3.64982	0	0.11382	0.122061	0	0
GABA.CGE.VIP.CALB2	4	3.76317	1.9218	0.0996282	0	0.00475052	0.00475052	0.993241	0	1.88489	0	0	1.80436	0	0	0.00947858	0	0	0.0953086	0.944451	0	2.07286	0.0327893	6.51313	2.80334	0.571779	3.15435	0	3.41677	0	0.0188682	0.81409	0	0
GABA.CGE.VIP.CALB2	4	3.11592	2.56717	0.855636	0	0	0	0.0478113	0	1.58912	0	0	1.02074	0	0	0.434908	0	0	1.78173	0	0	1.94316	0.645004	5.60905	0.886379	2.30307	1.96998	0	3.69819	0	0	0.365167	0	0
GABA.CGE.VIP.CALB2	4	3.86159	2.12243	0.674417	0	0	0.00833809	0.378787	0	0.310585	0	0	0.820963	0	0	0	0.00417774	0	0.00833809	0	0	1.21353	2.08671	5.69521	0	2.9717	2.5197	0	3.55566	0	0.349704	0.70384	0	0
GABA.CGE.VIP.CALB2	4	2.88588	0.565605	0.406423	0	0	0.600589	0.937839	0	2.72425	0	0	1.49232	0.575055	0.00416994	0	0.00832256	0	0.00416994	0	0	0.511975	0	5.03989	0	0.00416994	0.717274	0	1.54716	0	0	0	0	0
GABA.CGE.VIP.CALB2	4	3.61127	1.39045	0.372815	0	0	0	0	0	2.72506	0	0	1.81686	0.00455341	0	0	0	0.0358597	0.00455341	0.263295	0.00455341	0.0358597	2.11815	5.58408	0	0	1.80192	0	0.485656	0	0	0.00455341	0	0
GABA.CGE.VIP.CALB2	4	4.32303	1.68702	0.50906	0	0	0.00985762	0.193086	0	1.15669	0	0	2.52544	0.675935	0.00494096	0.00494096	0	0.771958	1.14099	0.569704	0	0.24481	0.564084	5.77511	3.00733	2.17658	2.23178	0	2.66505	0	0	1.92348	0	0
GABA.CGE.VIP.CALB2	4	3.41131	1.35997	0.429145	0	0	0.0242872	0.797234	0	1.987	0	0.00490486	2.41702	0	0	0	0	0	0.00490486	0	0	0.207904	0	5.87669	2.71546	0.00490486	1.64658	0	0.572084	0	0	1.52695	0	0
GABA.CGE.VIP.CALB2	4	2.77879	0.901192	0.2557	0	0	0.00569678	0.103051	0	2.62942	0	0	0	0	0	0	0	0	0	0.0169939	0	1.15942	0	5.36645	0	0.00569678	1.97864	0	3.09291	0	0	0.00569678	0	0
GABA.CGE.VIP.CALB2	4	3.85355	1.83453	0.614805	0	0	0.0170689	0.00572208	0	1.95524	0	0	2.29373	0.423921	0	0	0	0.0448853	0	0.361948	0	0.944818	0	5.21328	0	0	2.10785	0	3.12628	0	0	1.51685	0	0
GABA.CGE.VIP.CALB2	4	2.93806	1.64223	0.431476	0	0	0.0367109	0.772201	0	1.15504	0	0	1.70727	0.962634	0	0	0.00532765	0	1.31058	0.980827	0	0.742139	0	6.40599	3.73815	3.77288	3.01404	0	0.00532765	0	0	0.692611	0	0
GABA.CGE.VIP.CALB2	4	2.74641	1.24952	0.59802	0	0	0.0187484	1.11315	0	0.661036	0	0	2.87738	1.55356	0	0	0.00472015	0.00472015	1.53232	0	0	1.54046	1.42336	6.0283	4.43173	0	1.88807	0	0.00472015	0	0	0	0	0
GABA.CGE.VIP.CALB2	4	3.0862	2.52803	0.323841	0	0	0.00928428	0.649246	0	2.38501	0	0	2.51416	0	0	0	0.00465291	0.194359	0	0.0230511	0	1.34553	0.594152	5.82441	1.87588	0	0.933621	0	0	0	0	0	0	0
GABA.CGE.VIP.CALB2	4	3.19933	1.74408	0.445322	0	0	0.0123895	0.880818	0	1.66396	0	0.113784	2.26499	0.527075	0	0	0	0	0.314694	0.0164854	0	0.0526129	2.21591	5.63782	3.60831	0	1.91708	0	0	0	0	0	0	0
GABA.CGE.VIP.CALB2	4	4.23232	2.89495	0.309351	0	0	0	0	0	0.0171165	0	0	2.28724	0.54277	0	0.727722	0	0.774555	0.560174	0.355771	0	0.638377	1.22114	5.76155	2.49824	0.00430668	1.90745	0	2.63471	0	0	0.932479	0	0
GABA.CGE.VIP.CALB2	4	3.4818	2.70666	0.569419	0	0	0	0.525034	0	1.91245	0	0	2.10747	0.231795	0	0	0.0152282	0.0152282	0	0	0.0152282	0.7071	0.699505	5.90395	0.21955	0.0152282	1.96971	0	1.43311	0	0	0.0739231	0	0
GABA.CGE.VIP.CALB2	4	3.78634	2.6775	0.298454	0	0	0.00481856	0.377661	0	2.93202	0	0	2.44326	0.432419	0	0	0	0	0.200643	0.668622	0	1.02849	0.00481856	5.61472	2.31827	0	1.40057	0	0	0	0	0	0	0
GABA.CGE.VIP.CALB2	4	3.80986	2.72194	0.19508	0	0	0	0	0	2.28999	0	0	2.71531	0.0693421	0	0.134186	0	0	0	0.00715462	0	0.0421795	0	5.38164	0	0	1.79731	0	0.498485	0	0	0	0	0
GABA.CGE.VIP.CALB2	4	3.12803	1.8313	0.45143	0	0	0.0151671	0.345456	0	0.852235	0	0	2.19189	0	0	0	0	0	0	0.454668	0.00508132	1.62941	0.828047	5.14446	3.66076	0	1.49492	0	0	0	0	1.06652	0	0
GABA.CGE.VIP.CALB2	4	4.05513	3.0091	0.270178	0	0	0.0259484	0.29397	0	2.73338	0	0	1.79961	0	0	0.00524382	0.0104603	0	0.442956	0.00524382	0	1.07843	0.38385	5.83686	0.82312	0	1.53547	0	0	0	0	0	0	0
GABA.CGE.VIP.CALB2	4	3.14496	2.286	0.132394	0	0	0	0.276498	0	2.58627	0	0	1.49698	0	0	0.0461065	0	0	1.29102	0	0	1.07859	0	5.93398	2.42934	0.00588091	1.20645	0	0.00588091	0	0	1.25132	0	0
GABA.CGE.VIP.CALB2	4	3.5407	2.40727	0.368788	0	0	0.0262003	0.346511	0	2.60373	0	0	1.49314	0	0	0	0.031359	0	0.609151	0	0	1.1642	0	5.28325	0.466649	0	1.71953	0	0.00529526	0	0	0.731304	0	0
GABA.CGE.VIP.CALB2	4	3.39541	2.44314	0.581549	0	0	0.60233	0.1436	0	2.98642	0	0	2.46679	0	0	0.0041649	0	0.0328434	0	0	0	0.918953	0.96928	5.2282	0	1.89916	2.26238	0	0.428021	0	0.369198	0.704349	0	0
GABA.CGE.VIP.CALB2	4	3.35036	1.69696	0.66086	0	0	0.0104089	0.176948	0	1.04618	0	0	0.0410007	0.649995	0	0	0	0.399964	1.64985	0	0	1.55174	0.893605	5.78239	3.63256	3.44483	2.44051	0	0	0	0	0.713484	0	0
GABA.CGE.VIP.CALB2	4	3.7754	2.42583	0.297106	0	0	0.0102742	0.744316	0	2.09057	0	0	1.98569	0.323606	0	0.00515027	0	0.883758	0.475799	0	0	1.22863	1.02667	5.54377	0.951803	0	2.61	0	2.4639	0	0	0.65723	0	0
GABA.CGE.VIP.CALB2	4	2.32109	1.88424	0.023342	0	0	0.023342	0.512305	0	2.77875	0	0	1.32316	0.205625	0	0	0	0	0	0.118631	0	1.13454	0	5.68447	1.63413	0.00784134	2.11974	0	0	0	0	0	0	0
GABA.CGE.VIP.CALB2	4	2.92974	2.2925	0.351311	0	0	0.00545173	0.54007	0	2.9639	0	0	1.57754	0	0	0	0	0	0	0	0	0.823819	0	5.69972	1.40687	0	1.26623	0	0.00545173	0	0	0	0	0
GABA.CGE.VIP.CALB2	4	3.90128	2.11016	0.597451	0	0	0	0.215763	0	0.326826	0	0	2.2254	0	0	0	0.0125945	0.147062	0.00631706	0.200323	0	0.289578	0.758154	6.01847	3.46299	0	2.73505	0	3.51068	0	0	0.832516	0	0
GABA.CGE.VIP.CALB2	4	4.25438	2.66621	0.310471	0	0	0.00771628	0.275805	0	0.00771628	0	0	1.65281	0.542551	0	0	0	0	0.876322	0	0	0.321765	0.0153735	5.20717	1.50263	0.321765	2.8141	0	2.46531	0	0	0.360316	0	0
GABA.CGE.VIP.CALB2	4	3.35495	2.1297	0.228895	0.0288094	0	0.0231135	0.752533	0	1.31796	0	0	0.77702	0	0	0	0	0	2.00792	0	0	0.774328	0	6.07521	3.48562	0	2.46337	0	0	0	0	1.01718	0	0
GABA.CGE.VIP.CALB2	4	2.67231	2.28713	0.141958	0	0	0	0.0188865	0	1.76846	0	0	2.05252	0	0	0	0	0.6398	0	0	0	0.495847	0.381131	5.78516	0.666261	0	2.28971	0	2.50492	0	0	0.0251036	0	0
GABA.CGE.VIP.CALB2	4	2.98282	2.09843	0.439632	0	0	0.00487426	0	0	2.1326	0	0	1.8907	0	0	0.732292	0	0	0	0.0288954	0	0.476712	1.57095	5.43665	2.55364	1.36033	1.63106	0	3.1089	0	0.591234	1.07834	0	0
GABA.CGE.VIP.CALB2	4	3.95393	1.77968	0.157105	0	0	0	0.579273	0	1.30386	0	0	2.02548	0	0	0.0323957	0	0	0	0.708867	0	1.18872	2.46389	6.15169	1.5308	3.5316	2.50551	0	4.44465	0	0.0217133	0.356303	0	0
GABA.CGE.VIP.CALB2	4	4.06069	1.87287	0.342833	0	0	0	0.852258	0	0.622351	0	0	2.31399	0.269242	0	0	0	0	0.674609	0.0268972	0	0.283031	0.919689	6.18453	3.37753	0	1.91659	0	2.58741	0	0	1.24728	0	0
GABA.CGE.VIP.CALB2	4	2.93783	1.63072	0.330581	0	0	0.00610284	0.0121687	0	0.554288	0	0.262328	2.17878	0	0	0	0	0	0.115496	0.343689	0	0.823909	2.29815	5.43802	0	0	1.79197	0	0.751527	0	0	0	0	0
GABA.CGE.VIP.CALB2	4	4.19953	2.12696	0.540818	0	0	0.00596062	0.53733	0	0.402934	0	0	1.97982	0.139293	0	0	0	0.508987	0.00596062	0.302122	0	0.778292	1.06716	6.13206	2.38879	0	2.11765	0	3.74547	0	0	1.03158	0	0
GABA.CGE.VIP.CALB2	4	2.85206	2.63048	0.425451	0	0	0.0152535	1.36226	0	0.0152535	0	0	2.09106	0	0	0	0	0	0	0.98982	0	1.60098	0	5.83396	0	0	2.30329	0	0	0	0	0	0	0
GABA.CGE.VIP.CALB2	4	2.85629	2.38437	0.374729	0	0	0	0.856946	0	1.99346	0	0	1.75052	0	0	0	0	0	0	0.70644	0	0.496346	0.987736	5.61325	0	0	2.36541	0	3.00931	0	0	0	0	0
GABA.CGE.VIP.CALB2	4	3.20065	2.07078	0.273327	0	0	0.00522516	0.269333	0	2.97006	0	0	1.24795	0	0	0	0	0	1.44523	0.731983	0	0.0658859	0.0460717	5.79471	2.812	0	2.48939	0	1.99249	0.00522516	0.428114	0.181551	0	0
GABA.CGE.VIP.CALB2	4	3.9754	2.24117	0.739119	0	0	0	0.3462	0	1.9913	0	0	2.65323	1.43782	0	0	0	0	0.0984157	0	0	0.155926	0	5.39995	0	0.88405	1.61285	0	2.50606	0	0	0	0	0
GABA.CGE.VIP.CALB2	4	3.58484	1.67579	0.185652	0	0	0.0312407	0.193154	0	1.73108	0	0	2.19738	0	0	0.513388	0	0.00452315	0.37074	0.00452315	0	0.689548	0.488667	5.3641	3.28805	0.00452315	1.82671	0	0	0	0	0.0312407	0	0
GABA.CGE.VIP.CALB2	4	3.43759	1.53735	0.225455	0	0	0.0116938	0.547699	0	1.41084	0	0	0.982177	0	0	0	0	0	0	0	0	1.62214	0	5.67803	3.18884	0	0.704745	0	0	0	0	1.90106	0	0
GABA.CGE.VIP.CALB2	4	3.27994	2.43181	0.386678	0	0	0	0.795173	0	1.08861	0	0	1.46696	1.79767	0	0	0	0	0.0062747	0.930525	0	0.882215	0	4.93388	0	1.14024	2.52421	0	2.42125	0	0	1.35332	0.601345	0
GABA.CGE.VIP.CALB2	4	3.72309	1.48762	0.483102	0	0	0.00524972	0.844325	0	0.355115	0	0	0	0	0	0	0	0	2.05013	0.515055	0	0.377015	1.81694	5.97187	2.87095	3.53291	3.00887	0	0.20831	0	0	1.3529	0	0
GABA.CGE.VIP.CALB2	4	3.90229	0.287548	0.283075	0	0	0.0118281	0.572895	0	0.810632	0	0	2.08712	0	0	0	0	0	0.78654	1.14477	0	1.27091	1.62671	6.26409	2.93417	3.33041	3.52916	0	3.41134	0	0	0.218265	0	0
GABA.CGE.VIP.CALB2	4	2.55124	2.37009	0.228097	0	0	0	1.15912	0	2.56383	0	0	1.60177	0	0	0	0.0124204	0	2.65396	0	0	0.654845	0.182293	6.06078	2.65	0.0124204	2.61175	0	0	0	0	0.371511	0	0
GABA.CGE.VIP.CALB2	4	3.93367	1.24092	0.0561712	0	0.00639934	0.0377958	0.371143	0	0.99134	0	0	0	0	0.00639934	0	0.00639934	0	0.00639934	0	0	0.012758	0	6.01652	2.92368	3.66173	3.09944	0	3.4288	0	0	0.706645	0	0
GABA.CGE.VIP.CALB2	4	3.99433	2.90642	0.299301	0	0	0.00497212	0.156553	0	0.508586	0	0	1.58982	0	0	0	0	0.656025	2.08543	0.181805	0	1.41107	1.81548	5.94006	0.00497212	4.69831	2.7389	0	1.88972	0	0	0	0	0
GABA.CGE.VIP.CALB2	4	2.19272	1.98116	0.735529	0	0	0.0194468	0	0	0.657256	0	0	1.973	0.483562	0	0	0	0	0	0.713326	0	1.77097	0	5.27776	2.9062	0	1.22252	0	0.206282	0	0.0510406	0.959443	0	0
GABA.CGE.VIP.CALB2	4	3.33962	1.95921	0.534567	0	0	0.0327918	1.27727	0	1.80834	0	0	3.02048	0.33649	0	0	0.013246	0	1.80725	0.686488	0	1.06475	1.70601	5.96062	3.75862	1.83848	2.7668	0	0	0	0	0	0	0
GABA.CGE.VIP.CALB2	4	3.09759	2.61357	0.47432	0	0.638131	0.0207123	0.0674352	0	2.82185	0	0	2.5249	0.160759	0	0	0	0	0	0.411616	0	0.834877	0.0476778	5.68086	0.709248	0.00695188	1.96165	0	0	0	0	0	0	0
GABA.CGE.VIP.CALB2	4	2.82176	1.92103	0.149886	0	0	0.0839629	0	0	1.55874	0	0	2.62623	0	0	0	0	0	0	0	0	1.30516	0	5.54751	3.41098	0.00671498	1.14931	0	0	0	0.0962767	0.0777486	0	0
GABA.CGE.VIP.CALB2	4	2.94127	1.9903	0.0595998	0	0	0	1.02279	0	1.83269	0	0	0	0	0	0	0	0	0	0.534289	0	1.40379	0	5.10845	0	0	2.94208	0	2.36766	0	0	1.33146	0	0
GABA.CGE.VIP.CALB2	4	3.67233	1.64603	0.476062	0	0	0.00626613	0.77434	0	1.58738	0	0	0	0	0	0	0	0.0430601	1.85622	0.037021	0	1.10867	1.5346	5.9954	2.74295	2.29006	2.6786	0	0	0	0	2.07817	0	0
GABA.CGE.VIP.CALB2	4	4.20275	1.49547	0.336039	0	0	0	0.825447	0	0.386629	0	0	1.78035	0	0	0	0	0.524647	0.0239174	0	0	1.72907	0.610389	5.6605	2.98638	0.00603319	1.35907	0	2.70137	0	0	0.820132	0	0
GABA.CGE.VIP.CALB2	4	3.57647	1.09681	0.238905	0	0	0	0.866521	0	0.935602	0	0	2.10677	0	0	0	0	0	0	0.512091	0	1.2407	1.069	5.398	2.36339	0	1.55539	0	2.11671	0	0	1.15021	0	0
GABA.CGE.VIP.CALB2	4	3.99835	1.90364	0.330928	0	0	0.00640989	1.08127	0	1.60423	0	0	1.49072	0	0	0	0	0	0.228902	0.60406	0	1.57004	1.36922	5.63113	2.03291	0	2.55745	0	3.24472	0	0	0.989993	0	0
GABA.CGE.VIP.CALB2	4	4.43068	2.78006	0.515159	0	0	0.0121783	0.271893	0	1.46621	0	0	2.28025	0.0990747	0	1.02345	0	0.137179	0.64216	0.0652168	0	1.24561	0.496689	5.39799	2.60887	0.00610771	1.64564	0	2.53591	0	0.199302	1.25089	0.0879156	0
GABA.CGE.VIP.CALB2	4	3.14429	1.15695	0.470904	0	0	0	0.801078	0	0.196542	0	0	1.09464	0	0	0	0	0	0	0.00831865	0	1.18288	1.10852	5.48573	3.46676	0	2.97568	0	2.08984	0	0	0.275681	0	0
GABA.CGE.VIP.CALB2	4	2.66395	1.29755	0.409737	0	0	0	0.581366	0	1.6472	0	0	2.05923	0	0	0	0	0	1.6222	0	0	0.0438952	1.03009	6.21335	3.29467	0	1.87281	0	0	0	0	0	0	0
GABA.CGE.VIP.CALB2	4	3.26105	1.4182	0.0387553	0	0	0	0.225463	0	1.47944	0	0	1.7142	0	0	0	0	0	0	0.518601	0	0.774577	0.292549	5.73233	2.79314	0	2.40341	0	0.186881	0	0	0	0	0
GABA.CGE.VIP.CALB2	4	3.41662	2.10605	0.575461	0	0	0.00562148	0.689223	0	2.57887	0	0	2.36672	0.492875	0	0	0	0.00562148	0	0.831422	0	0.728075	0.0277966	5.57773	0	0.989985	1.79836	0	2.96818	0	0	1.09526	0	0
GABA.CGE.VIP.CALB2	4	3.77655	2.44803	0.359609	0	0	0.00743384	0.300618	0	0.936878	0	0	2.30914	0.139093	0	0	0	0	0	0	0	0.570154	1.29031	6.30342	3.53125	0	2.10327	0	3.40378	0.00743384	0.504777	0.56168	0	0
GABA.CGE.VIP.CALB2	4	3.68672	2.36034	0.234097	0	0	0	0.379526	0	1.29812	0	0	2.06884	0	0	0	0	0	0	0.0638587	0.00820893	1.12133	0.368183	5.2477	0.899739	0	1.38432	0	0.116574	0	0	0	0	0
GABA.CGE.VIP.CALB2	4	3.27495	2.71189	0.407534	0	0	0.00583303	0.351505	0	2.42291	0	0	1.70558	0	0	0	0	0	0.585345	0.00583303	0	0.558935	0.806572	5.92301	3.35097	0	1.53065	0	0	0	0	0.205511	0	0
GABA.CGE.VIP.CALB2	4	2.93203	2.4861	0.48559	0	0	0.00593601	0.0350987	0	1.74106	0	0	2.54058	0	0	0	0	0	0	0.803081	0	1.54061	0	5.09137	3.50623	0.011837	1.72209	0	0	0.011837	0	0	0	0
GABA.CGE.VIP.CALB2	4	2.53334	1.61526	0.349865	0	0	0.00662682	0.107086	0	1.74641	0	0	1.82766	0	0	0	0	0	0	0	0	0.225265	1.16131	5.80617	3.41513	3.01918	2.67395	0	0	0	0	0	0	0
GABA.CGE.VIP.CALB2	4	2.50237	2.76368	0.759423	0	0	0.0232923	0.452009	0	1.8028	0	0	1.2639	0	0	0.565309	0	0	0	0.034738	0	0.111388	0.657956	5.08862	0	2.44631	1.97049	0	2.42673	0	0	1.2639	0	0
GABA.CGE.VIP.CALB2	4	3.15113	1.88177	0.277697	0	0	0.0144446	0	0	0.467829	0	0	1.62839	0.277697	0	1.35416	0	0	0.639106	0	0	0.744673	2.16377	5.91993	0	2.3693	2.02599	0	3.17208	0	0	0.687812	0	0
GABA.CGE.VIP.CALB2	4	3.61313	2.26463	0.346114	0	0	0.00634235	0.394438	0	2.13045	0	0	1.5643	0.66681	0	0.58518	0	0	0.705256	0	0	0.727018	1.77588	5.75854	2.03372	1.9098	2.29008	0	2.80215	0.0126447	0.174689	1.0786	0	0
GABA.CGE.VIP.CALB2	4	2.11271	1.79159	0.232791	0	0	0.0062215	0.0837643	0	1.61326	0	0	1.11621	0	0	0	0	0	0	0.0062215	0	0.840199	0	4.78901	2.41459	0	0.631254	0	0	0	0	0.0185496	0	0
GABA.CGE.VIP.CALB2	4	2.9255	1.77353	0.348766	0	0	0.0052686	0.487732	0	1.55938	0	0.147105	1.60178	0	0	0.0052686	0	0	0.0105096	0.250958	0	0.299101	0.0157233	5.6486	1.19808	0.0413915	1.26587	0	0.100434	0	0	0.0105096	0	0
GABA.CGE.VIP.CALB2	4	3.08151	0.305013	0.368665	0	0	0.00555708	0.380162	0	1.45837	0	0	1.06287	0	0	0	0.00555708	0	0	0.573566	0	0.888774	0.697454	5.68573	3.21063	0.0110834	2.20364	0	0	0	0	0.564101	0	0
GABA.CGE.VIP.CALB2	4	3.76889	2.6741	0.338434	0	0	0	0.637529	0	2.18407	0	0	2.01989	0.0491173	0	0	0	0.524981	0.44069	0	0	1.09118	0.373694	5.79006	0	0.0142814	2.69714	0	2.38642	0	0	0.685768	0	0
GABA.CGE.VIP.CALB2	4	3.20743	1.82683	0.285077	0	0	0	0.49261	0	2.01553	0	0	1.63097	0	0	0	0	0	0	0.384415	0	1.39294	0	5.20856	3.14537	0.00577042	0.861098	0	0	0	0	0	0	0
GABA.CGE.VIP.CALB2	4	2.63251	2.73358	0.344782	0	0	0.00695343	0.329843	0	2.68575	0	0	2.02089	0.20154	0	0	0	0	0	0	0	1.31781	1.1018	5.65639	0	0	2.43455	0	2.1976	0	0	0	0	0
GABA.CGE.VIP.CALB2	4	2.79751	1.4594	0.327295	0	0	0.0120277	0.768061	0	2.09892	0	0	1.62607	0.673952	0	1.22966	0	0	0	0	0	1.2082	0	5.56073	3.38118	0.00603194	0.918884	0	0	0.00603194	0	0	0	0
GABA.CGE.VIP.CALB2	4	3.81164	2.43757	0.317315	0	0	0	0.893764	0	1.26488	0	0	1.1307	0	0	0.496236	0	0.408949	1.17576	0	0	0.915983	2.07555	5.76611	2.85668	0.915983	2.27878	0	2.54657	0	0	1.11101	0	0
GABA.CGE.VIP.CALB2	4	2.46841	1.25597	0.0641417	0	0	0	0.70793	0	1.45865	0	0	2.15035	0	0	0	0.00600408	0	0.866709	0	0	2.04391	0.00600408	5.83195	3.44257	0.00600408	1.3319	0	0	0	0	0.662406	0	0
GABA.CGE.VIP.CALB2	4	2.97054	0.853959	0.224475	0	0	0.0100163	0.553826	0	1.86112	0	0	1.61775	0	0	0	0	0	0	0	0	0.359676	0	5.7976	2.48304	0	2.57415	0	0.00502069	0	0	1.53885	0	0
GABA.CGE.VIP.CALB2	4	2.36849	0.0658424	0.484811	0	0	0	0.0112792	0	1.44017	0	0	2.28434	0	0	0	0	0	0.452873	0.254059	0	0.555591	0	5.77057	3.7647	0	1.63156	0	0	0	0	0.555591	0	0
GABA.CGE.VIP.CALB2	4	3.1664	2.50822	0.222622	0	0	0	0.388875	0	2.79759	0	0	1.09165	0	0	0	0	0	0	0.0382208	0	0.0964891	0.465118	5.5489	0	1.99053	2.4386	0	2.91065	0	0.0750344	0.367522	0	0
GABA.CGE.VIP.CALB2	4	3.02611	2.3153	0.697088	0	0	0.00567818	0.379286	0	1.938	0	0	1.4132	0	0	0	0	0	0	0	0	1.83897	0.281093	5.43633	0.147938	0	1.43784	0	0	0	0	0.181739	0	0
GABA.CGE.VIP.CALB2	4	3.82259	1.98428	0.493703	0	0	0	0.284917	0	2.09709	0	0	0.929459	0	0	0	0	0	0	0.444611	0	1.43564	0.904359	5.1339	0	2.23045	2.58829	0	3.22375	0.00521892	0.567558	0.692856	0	0
GABA.CGE.VIP.CALB2	4	3.84145	2.3507	0.325985	0	0	0	0.695171	0	1.87988	0	0	0.75651	0	0	0.0348813	0	0	0.413545	0.0100909	0	1.05825	1.87133	5.56745	0	2.74593	2.37032	0	3.6961	0	0.481598	0.253902	0	0
GABA.CGE.VIP.CALB2	4	3.48909	1.77858	0.610977	0	0	0.00506084	1.02458	0	1.19956	0	0	2.28319	0.0780519	0	0.539639	0	0	0.638145	0	0	0.548473	2.20745	6.34867	2.28215	3.8848	2.88935	0	3.01338	0	0.664595	0.941058	0	0
GABA.CGE.VIP.CALB2	4	2.73536	1.89478	0.878668	0	0	0	0.544733	0	0	0	0	0.492357	0.5209	0	0	0.00674494	0.823782	0.730477	0.17353	0	1.75523	1.0997	5.52016	0	0	2.00453	0	0.276179	0	0	0	0	0
GABA.CGE.VIP.CALB2	4	3.44636	2.46213	0.549031	0	0	0.00639681	0.0377811	0	1.35619	0	0	0.620534	0.952235	0	0	0	0.0621981	2.01671	0.0377811	0	0.0621981	0.603131	5.05181	0	1.89613	2.99067	0	3.04067	0.00639681	0	1.06896	0	0
GABA.CGE.VIP.CALB2	4	2.51352	1.49365	0.564205	0	0	0.0111678	0.632114	0	1.49491	0	0	2.35092	0	0	0.00559947	0	0	1.55003	0.32341	0	0.394003	0.027689	5.85288	4.21297	0.00559947	1.75317	0	0	0	0	0	0	0
GABA.CGE.VIP.CALB2	4	3.58957	2.513	0.347048	0	0	0	0.551825	0	0.84485	0	0	1.38568	0	0	0	0	0	0	0.175535	0	0.427985	1.07827	5.9818	1.81472	0.00517265	1.91587	0	1.92876	0	0	0	0	0
GABA.CGE.VIP.CALB2	4	3.34131	2.22175	0.728326	0	0	0.00580708	0.199925	0	2.71237	0	0	2.10678	0.627859	0	0	0	0	0	0	0	0.341941	1.58608	5.31041	0.386446	0.017321	2.30239	0	1.72501	0	0	0	0	0
GABA.CGE.VIP.CALB2	4	2.03	0.747752	0	0	0	0.00538473	0.145466	0	1.69741	0	0	2.67141	0.150124	0	0.608071	0	0	1.80601	0	0	0.973342	0	5.90824	4.39646	0	0.388749	0	0	0	0	0	0	0
GABA.CGE.VIP.CALB2	4	2.60975	1.11008	0.513039	0	0	0	0.657051	0	0.77752	0	0	1.6529	0.262285	0.0116921	0.594148	0	0.0736634	1.87242	0	0	1.06042	1.36973	5.36967	2.96525	3.99343	2.77006	0	0	0	0	0.4772	0	0
GABA.CGE.VIP.CALB2	4	3.50227	1.47207	0.336875	0	0	0.0239866	0.438428	0	0.696879	0	0	0	0	0	0	0	0	0	0.0120652	0	1.61137	0	4.72337	1.26782	0.00403793	1.85337	0	1.28251	0	0	2.04231	0	0
GABA.CGE.VIP.CALB2	4	3.35248	1.94357	0.300314	0	0	0.00820818	0	0	1.76015	0	0.00411251	1.4881	0	0	0	0.098056	0	0	0.734202	0	1.29693	0	5.40806	3.6135	0	1.35279	0	0	0	0	0	0	0
GABA.CGE.VIP.CALB2	4	3.74038	1.43687	0.360284	0	0	0.0264217	0.0772588	0	0.733168	0	0	0.635991	0	0	0	0.00534049	0	0	1.03696	0	1.47434	1.97568	5.53485	0.691139	0	1.46696	0	0.00534049	0	0	0	0	0
GABA.CGE.VIP.CALB2	4	3.07668	2.26299	0.240196	0	0	0.0141883	0.129387	0	2.38594	0	0	1.21411	0	0	0.00475183	0.00475183	0	0.00948119	0	0	1.46323	0	5.3294	0	1.00394	2.87891	0	2.15971	0	0.661831	0	0	0
GABA.CGE.VIP.CALB2	4	2.5237	1.05605	0.430453	0	0	0.0754255	1.07406	0	1.32934	0	0	2.13822	0	0	0.420213	0	0	0	1.67722	0	1.42673	0	5.57283	3.95917	0.00520927	0.704918	0	0	0	0	0	0	0
GABA.CGE.VIP.CALB2	4	3.56241	2.8324	0.527594	0	0	0.00465258	0.59412	0	2.21087	0	0	1.37185	0.209589	0	0	0	0.444436	0.253969	0	0	1.00946	1.59181	5.27189	3.1763	0.00465258	2.09158	0	0	0	0	1.34061	0	0
GABA.CGE.VIP.CALB2	4	3.40189	2.79896	0.303226	0	0	0.00630545	0.771897	0	1.50362	0	0	2.08994	1.50643	0	0.157674	0	0	0	1.09399	0.00630545	0.478443	0.989122	5.50559	0	2.71715	1.93814	0	2.97632	0	0	0	0	0
GABA.CGE.VIP.CALB2	4	2.62994	2.65517	0.578368	0	0	0	0.65249	0	3.03005	0	0	1.47666	0	0	0.798983	0.0170034	0	0.889856	0	0	0.3844	1.11771	6.29726	2.62416	0.0170034	2.3294	0	0	0	0	0.558946	0	0
GABA.CGE.VIP.CALB2	4	3.56753	1.66027	0.725989	0	0	0	0.130762	0	2.41061	0	0	2.42475	0	0	0.00632977	0	0.372142	0.622499	0	0	0.697949	0	6.07753	0	0.00632977	2.71152	0	1.85191	0	0	0	0	0
GABA.CGE.VIP.CALB2	4	4.48152	2.42366	0.107686	0	0	0	0.51715	0	1.40966	0	0	2.46317	0	0	0	0.00493119	0	0	0	0	1.44173	1.36143	5.55999	2.02154	0	1.79385	0	0.963718	0	0	0.806827	0	0
GABA.CGE.VIP.CALB2	4	3.379	2.20207	0.432913	0	0	0	0.172635	0	2.31813	0	0	2.70391	0	0	0	0	0	0.393971	0.987349	0	0.253507	1.00259	5.56529	1.61731	0.00587123	1.29306	0	1.89151	0	0	0.177577	0	0
GABA.CGE.VIP.CALB2	4	3.36748	2.17018	0.0998567	0	0	0	0.11475	0	2.52232	0	0	2.60243	0	0	0	0	0	0	0.235305	0	1.18528	0	5.62152	0.66532	0.00551176	1.10621	0	0.158145	0	0	0	0	0
GABA.CGE.VIP.CALB2	4	2.81912	1.61689	0.501108	0	0	0.00988306	1.19671	0	0.217798	0	0	2.63594	0.355629	0	0	0.00495374	0.413103	0.80493	0.0437243	0	0.875644	1.7625	5.43565	3.96953	0.00495374	2.29345	0	0.00495374	0	0.108153	0	0	0
GABA.CGE.VIP.CALB2	4	3.34809	1.96488	0.398303	0	0	0.0235877	0.620173	1.04304	1.28799	0	0	1.82314	0	0	0	0.0118634	0	0.989044	0.564069	0	0.112739	1.08826	5.3148	0.00594928	2.18206	2.63151	0	3.30304	0.00594928	0	0.851252	0	0
GABA.CGE.VIP.CALB2	4	3.25349	0	0.140478	0	0	0	0.26776	0	0.712756	0	0	0.81318	0	0	0	0.0053721	0	1.01769	0.786553	0	0.549607	0.9345	5.55687	2.92911	0.246939	2.34383	0	2.22951	0	0.116797	0.0676822	0	0
GABA.CGE.VIP.CALB2	4	2.65244	1.37259	0.211263	0	0	0	0.290812	0	1.01863	0	0	1.44266	0	0	0	0	0	0.00510081	0	0	1.21727	0	4.65089	2.98172	0.0101757	1.14995	0	0.0101757	0.020249	0	0	0.00510081	0
GABA.CGE.VIP.CALB2	4	4.52559	2.30034	0.79188	0	0	0	0.689915	0	0.0101387	0	0	2.71794	0.411786	0	0	0	0.561943	0.725071	0.198105	0	0.505171	0.935668	5.91001	3.31677	1.81581	2.36557	0	3.50886	0	0	1.29737	0	0
GABA.CGE.VIP.CALB2	4	4.57614	2.4194	0.653941	0	0	0.0279226	0.365845	0.430487	0.38914	0	0	2.54073	0	0	0.494662	0	0	0.994965	0.770553	0	0.971663	1.99218	6.08845	2.5771	1.83436	2.62418	0	3.31844	0	0	1.86903	0	0
GABA.CGE.VIP.CALB2	4	2.59931	1.87375	0.687353	0	0	0	0	0	1.88753	0	0	2.34059	0	0	0	0.00563236	0	0	0	0	1.10594	0	4.98017	3.56105	0.0168028	0.903629	0	0	0.00563236	0	0	0	0
GABA.CGE.VIP.CALB2	4	3.02033	1.88791	0.277871	0	0	0	0	0	2.89738	0	0	1.31167	0	0	0	0	0.0794231	0.744604	0.707106	0	1.07928	1.33641	5.43482	0.00515309	0	2.35736	0	3.04669	0	0	0.567939	0	0
GABA.CGE.VIP.CALB2	4	4.05935	2.39053	0.358563	0	0	0	0.46736	0	0	0	0	2.1312	0	0	0	0.00443624	0	0.37703	0.327006	0	0.920948	1.61328	6.17297	2.4722	3.43219	2.64888	0	2.59924	0	0.207987	0.677652	0	0
GABA.CGE.VIP.CALB2	4	2.68052	1.96324	0.0493153	0	0	0	0.00560112	0	2.31413	0	0	1.56916	0.3071	0	0	0.00560112	0.401645	0	1.16196	0	1.59456	0	5.30257	3.32152	0.00560112	1.67135	0	0	0	0	0	0	0
GABA.CGE.VIP.CALB2	4	2.79712	2.47116	0.340064	0	0	0	0.501734	0	3.3481	0	0.0116718	1.44602	0.105739	0.00585295	0	0.00585295	0	0.811079	0.505282	0	1.24115	0.762987	5.48737	2.10015	0.0116718	0.985388	0	0	0	0	0	0	0
GABA.CGE.VIP.CALB2	4	3.11511	2.35799	0.434978	0	0	0.0165439	0.209889	0	2.27063	0	0	0.409461	0.588183	0	0	0	0	0	0	0	1.38557	0.0055451	5.05571	0	1.36164	2.30782	0	3.38751	0	0.10545	1.50724	0	0
GABA.CGE.VIP.CALB2	4	2.88557	1.87591	0.0177089	0	0	0	0.795221	0	0	0	0	0.0910179	0	0	0.0177089	0	0	0.641478	0.256053	0	0.00593787	1.13598	5.92008	0	4.0336	2.80674	0	1.7041	0.00593787	0	0.762423	0	0
GABA.CGE.VIP.CALB2	4	3.61489	3.02074	0.261851	0	0	0.0110254	0.270347	0	2.47962	0	0	2.18408	0.6408	0	0.0273389	0	0.72747	0.363193	0.401019	0	0.826814	1.22872	6.05408	2.41389	2.84957	2.52413	0	2.82094	0.0055279	0	0.821952	0	0
GABA.CGE.VIP.CALB2	4	2.60902	2.62937	0.552069	0	0	0	0.304935	0	2.69288	0	0	1.90456	0	0	0	0	0	0	0.112297	0	0.517257	0.677319	5.77524	0	0.0292786	1.78438	0	0	0	0	0	0.322305	0
GABA.CGE.VIP.CALB2	4	3.28872	3.12552	0.151005	0	0	0	0.187698	0	1.7433	0	0	1.65802	0	0	0	0	0	0	0	0	1.32446	0	5.27853	0	1.44288	2.80312	0	1.7452	0	0	0.768864	0	0
GABA.CGE.VIP.CALB2	4	2.41957	1.70325	0.742682	0	0	0.00501737	0	0	2.15937	0	0	1.13868	0	0	0	0	0	0	0	0	0.812025	0.259875	5.2952	3.71721	0.0149772	1.7524	0	0.00501737	0	0.0248388	0	0	0
GABA.CGE.VIP.CALB2	4	3.22455	2.25926	0.249832	0	0	0.00615081	0.571669	0	1.53342	0	0	0	0.332798	0	0	0	0	0	0	0	0.629199	0.367572	5.05666	0.00615081	2.30152	2.3138	0	3.59225	0	0	0.0771527	1.21284	0
GABA.CGE.VIP.CALB2	4	3.49569	1.50745	0.224011	0	0	0.0187725	0.593384	0	0.598604	0	0	2.55395	0.111931	0	0	0	0.83618	0.970459	1.01264	0	1.08723	1.32619	5.2991	4.02038	0	2.09438	0	0.00472626	0	0	0	0	0
GABA.CGE.VIP.CALB2	4	3.90258	2.94381	0.662325	0	0	0.0100493	0	0	2.29438	0	0	2.2862	0	0	0	0	0.0823627	0.00503727	0.127821	0	1.16843	0	5.6107	0.00503727	0	2.85631	0	1.98126	0	0	0.0150363	0	0
GABA.CGE.VIP.CALB2	4	3.40011	2.15264	1.18283	0	0	0.0366891	0.746895	0	2.02796	1.21025	0	0.67615	0	0	0	0.0106207	0	2.13575	0.530252	0	1.25993	1.7859	5.68835	3.80669	2.59139	1.70386	0	0.00532443	0.00532443	0.0106207	0	0	0
GABA.CGE.VIP.CALB2	4	3.42316	2.63205	0.740128	0	0	0.0271479	0.490391	0	2.04433	0	0	2.23316	0	0	0	0	0.0271479	0	1.8203	0	1.55176	0	5.22792	3.27617	0	1.38161	0	0	0	0	0.0448455	0	0
GABA.CGE.VIP.CALB2	4	3.01109	2.25271	0.011579	0	0	0.011579	0.566922	0	2.65003	0	0	1.41332	0	0	0	0	0	0	0	0	0.74498	0	5.26396	0	0	3.06387	0	2.77225	0.00580626	0	0	0	0
GABA.CGE.VIP.CALB2	4	3.99852	1.975	0.379782	0	0	0.0108111	0.690436	0	0.634399	0	0	2.31878	0	0	0	0	0	1.76887	0.0161732	0	1.00567	1.72434	6.31529	2.44661	2.96372	2.96708	0	4.10365	0	0	0.0215066	0	0
GABA.CGE.VIP.CALB2	4	3.74237	0.215533	0.306256	0	0	0.00976937	1.18411	0	1.49748	0	0	2.8368	0	0	0.348706	0.00489662	0.00489662	0.638358	1.06965	0	1.58066	0.864751	6.12888	2.2556	2.77509	2.45798	0	3.25506	0	0	1.20639	0	0
GABA.CGE.VIP.CALB2	4	2.78752	1.72697	0.235192	0	0	0	0.560337	0	0	0	0	0.410921	0	0	0	0	0.00550879	0.00550879	0.00550879	0	0.306793	1.37227	5.35332	0.00550879	2.24795	2.46664	0	3.32413	0	0	0.706784	0	0
GABA.CGE.VIP.CALB2	4	3.51345	2.11961	0.535524	0	0	0.00497593	0.630178	0	2.47061	0	0	0.728751	0.31418	0	0	0	0	0.437426	0.0581368	0	0.965536	1.09705	5.23324	0.288345	0	1.92952	0	2.72436	0	0	0.4342	0	0
GABA.CGE.VIP.CALB2	4	3.35688	2.47914	0.374683	0	0	0.0176677	0.779732	0	2.94904	0	0	1.69593	0	0	0	0.00444628	0	1.30483	0	0.00444628	0.791918	0.468207	5.62658	0.271501	0	2.77922	0	0	0	0	0	0	0
GABA.CGE.VIP.CALB2	4	3.87961	2.6822	0.515401	0	0	0.00965554	0.408474	0	2.24712	0	0	2.35631	0	0	0	0	0	0	0	0	0.240327	0.884341	5.85538	0.723871	0	1.17595	0	0.477007	0.0144486	0	0	0	0
GABA.CGE.VIP.CALB2	4	3.82925	2.86749	0.137701	0	0	0.0260214	0.274866	0	2.74726	0	0	0.348213	0	0	0.00525873	0.00525873	0	0.876513	0.00525873	0	1.16273	0	5.86455	0.661925	0	2.26172	0	0	0	0	1.07312	0	0
GABA.CGE.VIP.CALB2	4	3.45085	3.34101	0.0374884	0	0.00544231	0.0108552	0	0	1.87778	0	0	2.98953	0	0.00544231	0	0	0	0.254044	0	0.00544231	1.54639	0	5.70699	0	0	1.7507	0	0.912202	0	0	0	0	0
GABA.CGE.VIP.CALB2	4	2.73756	2.35192	0.273563	0	0	0	0.728026	0	1.15061	0	0	0.524603	0.353157	0	0	0.0120289	0.365828	2.24376	0.140865	0	0.98886	2.31497	6.20693	3.26072	4.0828	3.13631	0	0	0	0	1.25592	0	0
GABA.CGE.VIP.CALB2	4	3.50652	2.20989	0.221953	0	0	0	0.494106	0	1.48691	0.00505887	0	1.15873	0.00505887	1.15395	0	0	0	0	0.382943	0	0.858327	0.97774	5.66212	0	1.96739	2.44485	0	3.64432	0	0	1.13619	0	0
GABA.CGE.VIP.CALB2	4	2.6167	1.73475	0.0275332	0	0	0.00556762	0.0436964	0	1.84207	0	0	1.24189	0	0	0	0.00556762	0.00556762	0.00556762	0.850132	0	1.45071	0	5.54478	1.64622	0.0436964	2.45936	0	0.692839	0	0	0	0	0
GABA.CGE.VIP.CALB2	4	3.72207	2.48876	0.30503	0	0	0.00515576	0.116945	0	2.65737	0	0	1.82373	0	1.44114	0	0	0	0	1.22787	0	1.0292	0	5.3266	0	1.57704	2.05511	0	3.19035	0	0	0	0	0
GABA.CGE.VIP.CALB2	4	3.14352	2.58542	0.0794	0	0	0	0.314163	0	0	0	0	0	0.842514	0	0	0.00549403	0	0	0.734914	0	0.608347	0.0640164	5.33494	3.16282	0	2.36057	0	2.53344	0	0	0	0	0
GABA.CGE.VIP.CALB2	4	3.47498	2.49513	0.0563656	0	0	0.0238729	0	0	1.48857	0	0	2.22287	1.89296	0	0.0517879	0	0.4815	0	0.00482039	0	1.30208	0.0238729	5.30228	0	2.49832	2.22496	0	2.70342	0	0	0.0878356	0.46038	0
GABA.CGE.VIP.CALB2	4	3.7462	3.10012	0.337315	0	0	0.0095066	0.589098	0	2.44752	0	0.150472	2.17953	0	0.0047646	0	0	1.67369	0.0095066	0	0	0.879174	0	5.2033	0	0.0095066	2.43421	0	1.44749	0	0	0.443908	0	0
GABA.CGE.VIP.CALB2	4	3.05079	3.40331	0.129079	0	0	0.0160794	0.691583	0	1.95017	0	0	0.993985	0	0	0	0	0	0	0.557115	0	1.9864	0.191216	5.02152	0	0.876347	2.48136	0	2.54567	0	0	0	0	0
GABA.CGE.VIP.CALB2	4	2.9273	2.42565	0.0099069	0	0	0.00496572	0.265177	0	1.92993	0	0	1.49732	0	0	0	0.00496572	0	1.09068	0.043828	0.0099069	1.14915	0	6.37746	3.65928	0	2.26198	0	0	0	0	1.22507	0	0
GABA.CGE.VIP.CALB2	4	3.79496	2.67151	0.532892	0	0	0.00979596	0.0386209	0	1.6662	0	0	1.74401	0	0	0	0	0	0.78442	0	0	0.503579	1.25709	5.95061	2.89587	0.00979596	2.55276	0	3.47337	0	0	1.14143	0	0
GABA.CGE.VIP.CALB2	4	3.60865	1.87173	0.383688	0	0	0.00561897	0	0	0.893025	0	0.00561897	0	0	0	0	0	0.189369	0.0112066	0	0	1.45645	0	5.03879	0.00561897	0	2.13006	0	1.34839	0	0	0	0	0
GABA.CGE.VIP.CALB2	4	3.19365	1.979	0.317303	0	0	0	0.0960042	0	2.26305	0	0	1.20458	0	0	0	0.0234324	0	0.768171	1.03452	0.00590978	0.0292057	1.5832	6.19505	0	0	2.08242	0	2.74377	0	0	0.0575826	0	0
GABA.CGE.VIP.CALB2	4	3.52392	1.60068	0.992942	0	0	0.00415597	0.0447925	0	1.51383	0	0	2.80265	0	0	0	0.00415597	0	0.00415597	0.206245	0.00415597	2.02717	0	5.54532	2.96266	0	0.682433	0	0	0	0	1.49346	0	0
GABA.CGE.VIP.CALB2	4	4.62295	2.48975	0.797478	0	0	0.0120656	0.540102	0	0.135984	0	0	2.11496	0	0	0.435826	0	0.416005	0.135984	0.69083	0	0.403921	1.61663	6.17904	1.61904	2.66393	2.47862	0	3.765	0	0	1.66256	0	0
GABA.CGE.VIP.CALB2	4	2.78229	2.39052	0	0	0	0.0057571	0.543319	0	2.03337	0	0	1.25441	0	0	0.129772	0.0057571	0	0	0.809649	0	1.25112	0	5.21451	1.29159	0	2.21843	0	1.04241	0	0	0.52641	0	0
GABA.CGE.VIP.CALB2	4	2.99855	2.14926	1.37881	0	0	0	0.0674935	0	0	0	0	0.862726	0	0	0	0	0	0.893966	1.42378	0	1.84329	0.687264	5.66194	0	0	1.67216	0	2.23902	0	0.659879	0	0	0
GABA.CGE.VIP.CALB2	4	2.94534	2.25741	0.181044	0	0	0.0144176	0.46104	0	1.30075	0	0	2.14723	0	0	0	0	0.511634	0	0.557021	0	0.454916	0	5.27602	0	1.76733	2.48595	0	3.15264	0	0	0.933808	0	0
GABA.CGE.VIP.CALB2	4	2.19501	2.2618	0.287875	0	0	0	0.341149	0	2.09882	0	0.547964	1.56857	0	0	0	0	0.00519881	0	1.41891	0	1.14329	0	5.02543	0	0.00519881	2.46898	0	0.239837	0	0	0.355863	0	0
GABA.CGE.VIP.CALB2	4	3.94721	2.44518	0.194537	0	0	0.00993875	0.614648	0	1.89362	0	0	2.49337	0	0	0	0.00498172	0.862214	1.0217	0	0	1.05876	0	6.36573	2.80529	0	2.64544	0	3.88894	0	0	0.962451	0	0
GABA.CGE.VIP.CALB2	4	3.85515	2.42086	0.686888	0	0	0.00611494	0.295267	0	0	0	0	2.98443	0.466852	0	0	0	0	0.163713	0.25331	0	1.39984	1.02861	5.67387	2.57508	2.48215	2.92105	0	2.31882	0	0	0.586329	0	0
GABA.CGE.VIP.CALB2	4	3.80911	3.00439	0.189521	0	0	0.0141273	0.526152	0	1.85286	0	0	2.26059	0	0	0	0	0	0.268701	0	0	1.31432	0	5.82235	0	0	2.43862	0	1.49454	0	0	0	0	0
GABA.CGE.VIP.CALB2	4	3.297	2.5848	0.194012	0	0	0.0222878	0.011206	0	2.38926	0	0	1.72136	0	0	0	0	0	0.0222878	0	0	0.0167622	0.00561868	4.75636	1.09304	0	0.546299	0	0	0	0	0	0	0
GABA.CGE.VIP.CALB2	4	3.47844	2.38648	0.520464	0	0	0.00425847	0.621676	0	2.3166	0	0	2.11028	0.00425847	0	0	0.00425847	0	0.0700375	0.355403	0	0.00849889	0.851978	5.72925	0.510268	0	1.94776	0	0.0169262	0	0	0	0	0
GABA.CGE.VIP.CALB2	4	2.47294	2.52777	0.0125312	0	0	0.0611424	0.994124	0	2.32291	0	0.0125312	2.17252	0	0	0	0.0125312	0	0.129897	0	0	1.32819	0	1.41762	0.740543	0	0.465413	0	0	0	0	0	0	0
GABA.CGE.VIP.CALB2	4	2.91491	1.99011	0.30701	0	0	0.00459653	1.05288	0	1.66131	0	0	1.53463	0	0	0	0	0	2.32152	0.0754051	0	1.81882	2.00697	6.06473	3.19211	2.86419	2.82563	0	0	0	0	0.596338	0	0
GABA.CGE.VIP.CALB2	4	3.67275	2.81988	0.618518	0	0	0.0166484	0	0	1.07902	0	0	1.73663	0	0	0	0.0111297	0	0	0	0	1.47063	0.3184	5.27162	0.48658	0	2.78388	0	2.84459	0	0	0	0	0
GABA.CGE.VIP.CALB2	4	3.58696	1.7638	0.370137	0	0	0.0153279	0.273127	0	0	0	0	2.66665	0	0.00513544	0	0	0.764606	0.853967	0.0743927	0.00513544	0.862696	1.78476	6.36401	2.51054	4.09637	2.52177	0	3.57549	0	0	0.0254175	0	0
GABA.CGE.VIP.CALB2	4	3.02583	1.28643	0.2453	0	0	0.00470089	1.08046	0	1.84963	0	0	1.2493	0	0	0	0.00470089	0	0	1.4461	0	0.90427	0	5.45398	2.39864	0	2.40674	0	2.56033	0	0	1.21774	0	0
GABA.CGE.VIP.CALB2	4	3.71926	2.46305	1.10268	0	0	0.0308776	0	0	1.62672	0	0	0.873587	0	0	0	0.00521294	0	0.457518	0	0	0.74327	0.512223	5.11382	0	2.25222	1.94218	0	2.82075	0	0.323197	0	0	0
GABA.CGE.VIP.CALB2	4	3.3393	2.42309	0.0723273	0	0	0.0139659	1.08978	0	1.71669	0	0	1.0882	0	0.00467699	0	0.00467699	0	0.00467699	0.00933221	0	1.77158	0	4.90867	0	0	2.02514	0	2.71292	0	0	1.08504	0	0
GABA.CGE.VIP.CALB2	4	4.20067	2.64251	0.0616845	0	0	0.00974113	0.137002	0	0	0	0	2.14559	0	0	1.1313	0	0.00488242	0.433906	0	0	1.34387	0.917318	6.66665	2.76066	2.3703	2.75133	0	4.04496	0	0	0	0	0
GABA.CGE.VIP.CALB2	4	2.93589	1.30197	0.609766	0	0	0.0155309	0	0	1.30197	0	0	1.02026	0	0.00520383	0	0	0	0	0	0	1.47486	1.23142	5.4154	2.26916	0	1.98106	0	3.06631	0	0	1.25846	0	0
GABA.CGE.VIP.CALB2	4	3.31687	2.83133	0	0	0	0.040594	0.415353	0.699157	1.1692	0	0	2.76574	0.00590101	0	0	0.00590101	0	0.0175996	0	0.00590101	0.0574993	1.72569	5.28741	0.00590101	1.80273	2.16127	0	3.12925	0	0	0	0	0
GABA.CGE.VIP.CALB2	4	2.34313	1.87807	0.433287	0	0	0.0101804	0	0	1.38454	0	0	2.27766	0	0.00510317	0	0	0.00510317	0	0.00510317	0	1.19617	0.00510317	5.23056	1.29057	0.00510317	1.69676	0	0.436598	0	0.106661	0	0	0
GABA.CGE.VIP.CALB2	4	3.30538	1.8304	0.109057	0	0	0.0315058	0.835471	0	0.405008	0	0	2.54878	0	0	0	0	0	0	0.0127217	0	0.0560147	0	6.09443	3.05626	0.00638106	2.86675	0	2.40823	0	0	0.0799372	0	0
GABA.CGE.VIP.CALB2	4	3.42958	0.594045	0.501949	0	0	0.00961199	0.683259	0	1.08541	0	0	1.4016	0.243152	0.00481754	0	0	0	0.00961199	0	0	1.2337	1.12224	5.45842	0	0.00481754	0.899514	0	1.49571	0	0	0	0	0
GABA.CGE.VIP.CALB2	4	3.55875	2.72924	0.106993	0	0	0.0102138	0	0	2.95767	0	0	2.10183	0	0.00511992	0	0	0	0.624592	0	0	1.00424	0	5.27989	0	0.00511992	2.48577	0	0	0	0	0	0	0
GABA.CGE.VIP.CALB2	4	4.02367	2.09268	0.353342	0	0	0	0.0302493	0	0.0881339	0	0	2.28007	0.258379	0	0	0.0061235	0.0061235	0.8285	1.11564	0	1.04906	2.01225	6.14444	1.603	3.90803	2.55895	0	4.00134	0	0.126748	1.33685	0	0
GABA.CGE.VIP.CALB2	4	3.32961	2.50015	0.0517578	0	0	0.00481753	0.542059	0	1.99671	0	0	1.90905	0	0	0	0	0.00481753	0	0.0238589	0	1.51924	0.298399	5.33443	0	0	1.55862	0	1.01793	0	0	0	0	0
GABA.CGE.VIP.CALB2	4	3.16878	2.18249	0.15479	0	0	0.005218	0.0657983	0.658158	2.59205	0	0	1.86429	0	0	0	0.005218	0	0	0	0.005218	0.639013	0.132128	5.67532	1.6668	0	2.53896	0	3.36367	0	0	0.912691	0	0
GABA.CGE.VIP.CALB2	4	3.29798	2.07632	0.313675	0	0	0	0.22134	0	1.8372	0	0	0.0374066	0	0	0	0	0	0.00633241	1.55235	0	1.17828	0	5.21108	0	0	1.59964	0	1.61366	0	0	0	0	0
GABA.CGE.VIP.CALB2	4	3.07437	0	0	0	0	0.00655676	0.342067	0	0	0	0	0.652827	0	0	0.0575184	0.00655676	0.00655676	0.00655676	0.117772	0	1.48779	0	5.27701	1.90653	0.00655676	2.35379	0	3.23781	0	0	1.23372	0	0
GABA.CGE.VIP.CALB2	4	3.92464	1.58367	0.589366	0	0	0.00455124	1.06861	0	0.574068	0	0	1.7402	0.00455124	0	0	0	0	0.88698	0.190483	0	0.00455124	1.16843	6.36235	2.76535	3.60833	2.9162	0	2.25543	0	0	1.53278	0	0
GABA.CGE.VIP.CALB2	4	4.03933	3.03649	0.23129	0	0	0	0	0	1.69724	0	0	2.06254	0	0	0	0	0.00995887	0.00499183	0	0	0.850645	0.718282	4.35852	0	0.00499183	2.39	0	1.77482	0	0	0	0	0
GABA.CGE.VIP.CALB2	4	3.59698	0.0509815	0.108915	0	0	0.00521671	0.0308997	0	1.7804	0	0	1.45137	0	0	0.198584	0	0.785051	0	0.00521671	0	1.37369	0.865242	5.79655	2.2589	0	2.11896	0	3.05694	0	0	1.65467	0	0
GABA.CGE.VIP.CALB2	4	3.30768	2.57056	0.151931	0	0.00527893	0.00527893	0.00527893	0	2.10328	0	0	0	0	0	0	0.00527893	0	0	0	0	0.481974	0.17441	4.95013	2.15429	0	1.3308	0	0.0157539	0	0	1.39184	0	0
GABA.CGE.VIP.CALB2	4	3.68422	2.91971	0.740301	0	0	0.00909655	0.179374	0	2.33902	0	0	1.56319	0	0	0	0.00455862	0	0	0	0	1.00491	0.921218	5.11913	0	0.148348	2.2626	0	0.538111	0	0	0.670353	0	0
GABA.CGE.VIP.CALB2	4	3.94549	2.65895	0.64654	0	0	0	0.180913	0.640752	0	0	0	0	0	0	0	0	0.872834	1.16595	0	0.010957	1.26864	1.15386	4.54969	0	2.96635	2.6292	0	3.34328	0	0	0.65516	0	0
GABA.CGE.VIP.CALB2	4	3.06733	0.899277	0.284809	0	0	0.0391634	0.0628839	0	1.8926	0	0	2.0725	0	0	0	0.00498013	0.00498013	0	1.62608	0	0.726778	0	5.62951	3.45266	0	1.73484	0	0	0	0	1.06373	0	0
GABA.CGE.VIP.CALB2	4	3.07449	1.76625	0	0	0	0	0	0	1.62981	0	0	2.21306	0	0	0	0	0	0	0	0	2.12052	0	5.82267	3.45466	0.0603094	0.171004	0	0	0	0	1.13578	0	0
GABA.CGE.VIP.CALB2	4	3.37799	1.98744	0.407066	0	0	0.0095241	0.613514	0	2.51401	0	0	1.05294	0	0	0	0	0.00477339	0	1.07114	0.00477339	0.444571	2.23839	6.20712	0	0.25979	2.33323	0	3.29213	0	0.0095241	0.0421618	0	0
GABA.CGE.VIP.CALB2	4	4.84712	3.34155	0.683989	0	0	0	0.54471	0	0	0	0	2.48448	0	0	0.54471	0	0.967119	0.196945	0.28088	0	1.67277	1.6819	5.57542	0.780093	2.42615	2.93436	0	3.35311	0	0	0.985526	0	0
GABA.CGE.VIP.CALB2	4	2.71725	2.48308	0.0383433	0	0	0.0275373	0	0	0	0	0	0	2.14392	0	0	0.00556845	0	0	0	0	0	2.94076	4.47459	3.86068	0	0.105872	0	0.954364	0	0	0	0	0
GABA.CGE.VIP.CALB2	4	2.18225	1.74577	0.0459938	0	0	0.0289931	0.604082	0	3.17061	0	0	1.73338	0	0	0	0.00586625	0	0	1.14847	0	1.40104	0	5.98889	3.75494	0	1.66006	0	0.0116983	0	0	0.868201	0	0
GABA.CGE.VIP.CALB2	4	2.54468	2.78813	0.222752	0	0	0.0120978	0.801686	0	2.51166	0	0	2.32313	0.260976	0	0	0	0	0.0704842	1.3268	0.00606719	1.01257	1.18104	6.11731	2.48868	0	2.0034	0	0.00606719	0	0	0	0.00606719	0
GABA.CGE.VIP.CALB2	4	1.93587	2.37246	0.798957	0	0	0	0.194089	0	2.17172	0	0	0.478981	0	0	0	0.00562113	0	1.01885	0	0.00562113	1.45412	1.58363	5.9971	2.8973	0.00562113	2.93244	0	0.291339	0	0	1.52035	0	0
GABA.CGE.VIP.CALB2	4	3.39063	1.79661	0.574909	0	0	0	0.225827	0	2.91679	0	0	2.43142	0	0	0	0.00421377	0	0	0.229191	0	0.453799	0.746953	5.74748	1.97099	0	1.20578	0	0.00840985	0	0	0.208839	0	0
GABA.CGE.VIP.CALB2	4	3.13382	2.75174	0.0267649	0	0	0.0107921	0.713757	0	2.21065	0	0	0.763013	0	0	0	0	0.76048	0.00541059	0	0	0.583381	0.436932	4.75592	0	0.0161447	2.30588	0	1.77294	0	0	0.0882208	0	0
GABA.CGE.VIP.CALB2	4	3.32961	0.0903018	0	0	0	0.00628054	0.229771	0	1.25131	0	0	0.775582	0	0	0	0.00628054	0	0	0.544957	0.00628054	0.46117	0	5.45668	2.63527	0.0125219	2.80022	0	1.05253	0	0	1.79844	0	0
GABA.CGE.VIP.CALB2	4	4.60561	2.95881	0.448591	0	0	0.00482683	0.347914	0	0.266069	0	0	1.91854	0	0.251125	0.00482683	0	0.743449	0.00482683	0.0745656	0	0.641833	1.40424	6.2009	1.21804	0.13554	3.35927	0	4.05831	0	0.247354	0.715454	0	0
GABA.CGE.VIP.CALB2	4	3.27134	2.16474	0.443176	0	0	0.00524703	1.20629	0	1.58673	0	0	1.27622	0.132818	0	0	0	0	1.96857	0.128201	0.00524703	1.1157	1.83767	6.01738	3.30046	2.84327	2.36935	0	0.00524703	0	0	1.65536	0	0
GABA.CGE.VIP.CALB2	4	4.04851	3.02868	0.308158	0	0	0.00461646	0.3383	0	2.31908	0	0	3.31954	0.779288	0	0	0	1.57319	0.00461646	0.462252	0	0.058413	1.1435	5.61467	1.75996	0.00461646	2.18328	0	2.69074	0	0.598288	0.833007	0	0
GABA.CGE.VIP.CALB2	4	3.42774	1.9964	0.236988	0	0	0.0110811	0.254418	0	1.10605	0	0	1.02547	0.236988	0	0	0	0	0	0	0	1.01946	0.940001	5.54764	1.01946	0	1.48884	0	0.666358	0	0	0.0274759	0	0
GABA.CGE.VIP.CALB2	4	3.83675	3.58152	0.391356	0	0	0	0.067625	0	1.40834	0	0	2.2757	0.447946	0	0	0	0.0212989	0.00536742	0	0	1.69477	0	5.3802	0	2.1843	2.78624	0	2.72677	0	0.36928	0	0	0
GABA.CGE.VIP.CALB2	4	3.59993	2.9736	0.575464	0	0	0	0.0478013	0	1.58269	0	0	1.0586	0.376366	0	0.270099	0	0.717824	0.867866	0	0	0.60263	0	3.90854	0.0054255	2.84813	2.64926	0	2.56462	0	0	0.89268	0	0
GABA.CGE.VIP.CALB2	4	2.61643	2.39545	0.484476	0	0	0.0106896	0.163245	0	0.563984	0	0	0.885408	0	0	0	0.0053591	0	0.185809	1.58287	0	1.16748	2.80546	5.49269	0	0.0106896	1.8513	0	2.15092	0	0	0	0	0
GABA.CGE.VIP.CALB2	4	4.00422	2.37032	0.229596	0	0	0	0.567046	0	1.87673	0	0	2.15985	0	0	0	0	0	0.44537	0	0.005595	0.987011	0	5.80612	3.21267	0.005595	2.6636	0	3.04515	0	0	1.54103	0	0
GABA.CGE.VIP.CALB2	4	4.0706	2.05671	0.35345	0	0	0	0.108991	0	1.3874	0	0	2.75983	0	0.00522056	0.0948101	0.00522056	0.288924	0.642004	0.0707184	0	0.8434	1.52517	5.92367	3.6563	0.0155806	2.3241	0	2.51728	0	0	1.13611	0	0
GABA.CGE.VIP.CALB2	4	4.04465	2.67543	0.274551	0	0	0.0120783	0	0	0.0646948	0	0	3.2598	0	0	0.172565	0	1.11433	0.0358058	0	0	0.463325	0	6.42774	3.31604	0.0120783	2.18109	0	3.21324	0	0	0.843512	0	0
GABA.CGE.VIP.CALB2	4	3.39562	1.95041	0.235975	0	0	0	0.10494	0	1.01246	0	0	0.662159	1.44564	0	0	0	0	0	0.0029859	0.0029859	0.865237	3.19371	5.68581	2.55154	0.00596292	1.81538	0	2.20574	0	0.362275	0	0	0
GABA.CGE.VIP.CALB2	4	3.93985	2.65043	0	0	0	0.0144368	0.771645	0	1.25585	0	0	1.68123	0	0	0	0.00483547	0.00483547	0.00483547	0.378766	0	1.10728	0	6.21821	2.43549	0	3.01759	0	3.71461	0	0.00483547	0.181266	0	0
GABA.CGE.VIP.CALB2	4	2.77314	1.74345	0.41857	0	0.2615	0.572775	0.967299	0	1.08812	0	0.256485	1.96023	0.388186	0.0129109	0.527809	0	0	0.863285	0.0750777	0	1.46629	2.78404	5.80601	3.0537	0.0129109	3.19711	0	0	0	0	0.546791	0	0
GABA.CGE.VIP.CALB2	4	2.85116	1.49241	0.27143	0	0	0.00438249	0.307597	0	1.51968	0	0.00438249	2.13975	0	0.00438249	0	0.597149	0	1.41226	0.135352	0	1.26374	0.986629	5.80755	2.93415	0	1.77299	0	0	0	0	1.48149	0	0
GABA.CGE.VIP.CALB2	4	2.83967	2.17542	0.19625	0	0	0.00918455	1.05377	0	2.55277	0	0	1.01774	0	0.00460282	0.00460282	0	0	1.91882	1.21393	0	0.964672	1.41777	6.02246	3.23966	0	2.30543	0	0	0	0	0.97168	0	0
GABA.CGE.VIP.CALB2	4	2.95102	2.59384	0.503924	0	0	0	0.687357	0	2.57638	0	0	2.1057	0.524192	0	0	0.00563241	0	0	0.0278501	0	1.2038	0.283374	5.76842	2.7198	0	2.06213	0	0	0	0.248745	0	0	0
GABA.CGE.VIP.CALB2	4	3.0587	2.60723	0.226645	0	0	0	0.736573	0	2.51905	0	0	0.181004	0	0	0	0	0	1.59384	0.00507479	0	0.950637	0.673746	6.12515	2.58332	2.78952	3.16101	0	0	0	0	1.27521	0	0
GABA.CGE.VIP.CALB2	4	3.09876	2.3858	0.310603	0	0	0.00550372	0.756766	0	2.32293	0	0.00550372	1.62065	0.00550372	0.00550372	0	0.00550372	0	1.03325	0	0	0.508182	0.722525	5.71193	0.0484759	0.00550372	1.30948	0	0	0	0	0.878513	0	0
GABA.CGE.VIP.CALB2	4	3.90352	2.68021	0.386742	0	0	0	0.293428	0	0.532402	0	0.216187	1.40858	1.5304	0.0104381	0	0	0	1.44634	0.155194	0	0.372384	0.216187	5.6083	0	2.8756	3.09847	0	2.58955	0	0	0.203427	0	0
GABA.CGE.VIP.CALB2	4	3.07473	2.35812	0.26421	0	0	0.00502737	0.65091	0	2.27255	0	0	1.22053	0	0	0	0	0	1.59559	0.0443615	0	1.04898	1.79339	5.99209	2.92801	0	1.86693	0	0	0	0	1.27831	0	0
GABA.CGE.VIP.CALB2	4	3.25113	2.18973	0.366866	0	0.00559451	0	0.347238	0	2.25477	0	0.00559451	1.81007	0.00559451	0.0111579	0	0	0	0.193251	0.065153	0	0.917702	0.121363	5.93664	0	0.00559451	2.6068	0	0	0	0.389922	0.0111579	0	0
GABA.CGE.VIP.CALB2	4	2.77688	0.739889	0.332671	0	0	0	0.258158	0	1.52077	0	0	2.12036	0.202004	0	0	0	0	2.00194	0.933506	0	0.759375	1.43198	5.84973	3.12969	1.82576	2.42612	0	0	0	0	0	0	0
GABA.CGE.VIP.CALB2	4	2.51599	1.36667	0.334508	0	0	0.0108248	0.746749	0	1.48802	0	0	0.103311	0.169761	0.00542706	0	0	0	1.43762	0.183443	0	1.2317	0	6.10516	3.57308	3.04368	2.36438	0	0	0	0	0.784703	0.462296	0
GABA.CGE.VIP.CALB2	4	2.32224	0.91114	0.791346	0	0	0	0.800729	0	0.694931	0	0.00518638	1.42087	0	0	0	0	0	0.894273	1.06758	0	0.96803	0.752909	5.54646	3.96761	2.1765	2.63456	0	0	0	0	0.347827	0	0
GABA.CGE.VIP.CALB2	4	2.85248	2.51462	0.484123	0	0	0	0.909872	0	2.56632	0	0	0.729119	0	0	0	0.5474	0	0.153258	0	0	0.446688	0	5.45996	0	3.08869	2.39462	0	2.94235	0	0	0	0	0
GABA.CGE.VIP.CALB2	4	3.70084	1.86336	0.644018	0	0	0	0.308694	0	1.69435	0	0.00515308	2.16308	0.250098	0	0.0936371	0.00515308	0.316254	0.585351	0.822461	0	1.08802	1.8988	6.21163	2.7853	0.0102797	1.97904	0	3.30317	0	0	0.81334	0	0
GABA.CGE.VIP.CALB2	4	2.53518	0.941036	0.159164	0	0.00491734	0	0.292768	0	1.52894	0	0	0.785237	0	0.00491734	0.00491734	0	0	0	0.539279	0	1.60207	1.07075	5.68489	2.21895	0	2.01779	0	0	0	0	1.28579	0	0
GABA.CGE.VIP.CALB2	4	3.45635	2.47475	0.128505	0	0	0.0151214	0.226289	0	1.66227	0	0	2.73228	0	0	0	0.00506592	0	0.801581	0	0	0.469563	0	4.1214	0	0.0250768	2.16501	0	1.14525	0.00506592	0	0	0	0
GABA.CGE.VIP.CALB2	4	2.51306	1.49718	0.0871172	0	0	0	0.845855	0	2.15652	0	0	1.2094	0	0	0	0	0	0	0.900751	0	1.33141	0	5.94869	2.95464	0	1.28912	0	0	0.00504418	0	1.32201	0	0
GABA.CGE.VIP.CALB2	4	2.43933	1.52071	0.298662	0	0	0	0.455812	0	0.767747	0	0	1.99389	2.35441	0	0	0	0	0.634435	0.23819	0	1.36581	2.53028	5.71363	3.23363	2.55639	2.83615	0	0	0.00787919	0	0	0	0
GABA.CGE.VIP.CALB2	4	3.32517	1.62306	0.88724	0	0	0.0044126	0.214149	0	2.15712	0	0	2.02674	0.235341	0	0.425713	0.0044126	0.945599	0.0044126	0	0	0.136223	1.54411	6.04578	0.659133	2.70754	2.7729	0	2.16019	0	0.0765927	0.628942	0	0
GABA.CGE.VIP.CALB2	4	2.90196	1.79052	0.58251	0	0	0	0.265723	0	2.29198	0	0	2.08584	0	0	0	0	0	0	0.892632	0	1.41376	0	4.95025	3.06858	0.0291625	1.49471	0	0	0.0042185	0	0	0.0042185	0
GABA.CGE.VIP.CALB2	4	3.20125	1.83196	0.502434	0	0	0.00402116	0.315315	0	1.54302	0	0.16663	1.71217	0	0	0	0	0	0.229422	0.0278144	0	0.487699	0	5.19666	2.29138	0.00802622	0.935008	0	0	0.00402116	0	0.43955	0	0
GABA.CGE.VIP.CALB2	4	2.2567	1.79581	0.371971	0	0	0	0.118646	0	2.33474	0	0	1.76311	0	0	0	0	0	0	0.571186	0	1.33894	0	5.52667	3.47519	0	0.968043	0	0	0.00483337	0	0	0	0
GABA.CGE.VIP.CALB2	4	2.63115	1.08639	0.254882	0	0	0	0.699847	0	0	0	0	0.00526448	0	0	0	0	0	0	0	0	1.05564	1.06478	5.82522	0	0.00526448	2.40577	0	2.08983	0	0	0	0	0
GABA.CGE.VIP.CALB2	4	3.34592	1.4481	0.177054	0	0	0.0140734	0.862908	0	1.33415	0	0	1.28572	0	0	0	0.00940421	0	0.144881	1.08857	0	0.418494	1.38627	5.27139	1.03968	0.00471316	2.13698	0	1.72134	0	0.45512	1.43018	0.648039	0
GABA.CGE.VIP.CALB2	4	2.66349	2.53876	0.322377	0	0	0.00534351	0.948005	0	3.27179	0	0	1.88202	0.432522	0	0	0.00534351	0	1.71743	0.153658	0	0.135109	0.00534351	5.87156	1.40233	0.0106586	2.10163	0	0	0	0	0.483356	0	0
GABA.CGE.VIP.CALB2	4	2.41685	1.68549	0.348102	0	0	0	0.31151	0	2.11128	0	0	0.774949	0.125897	0	0	0	0	0	0	0	1.05237	0	5.59129	0	0.00461574	2.11909	0	0.294425	0.00921027	0	0	0	0
GABA.CGE.VIP.CALB2	4	3.12896	2.9001	0.07923	0	0.0051401	0	0.40881	0	2.71569	0	0	2.48939	1.07057	0	0	0.0051401	0	0.779376	0	0	0.733425	0.546165	5.74272	0.0153417	0.0153417	1.29157	0	0	0	0.334188	0	0	0
GABA.CGE.VIP.CALB2	4	3.01155	2.1837	0.0944422	0	0	0	0.869886	0	3.15143	0	0	0.541208	0	0	0	0.00494006	0	1.21555	0	0	0.286534	1.08389	5.72953	3.05285	0	2.18314	0	0	0	0	0.425199	0	0
GABA.CGE.VIP.CALB2	4	3.8352	2.31484	0.445955	0	0.00505011	0.00505011	0	0	1.1153	0	0	1.56908	0.110151	0	0	0	0	0.17596	0	0	0.804396	2.26143	6.28852	2.99856	0	2.36174	0	3.03159	0	0	0	0	0
GABA.CGE.VIP.CALB2	4	3.60023	2.57879	0.50027	0	0	0.00462618	0.591569	0	0.295003	0	0.00462618	0.00462618	0	0.00923106	0	0	0	0.00462618	0.177937	0	0.900415	1.74403	5.95729	1.90607	0.00462618	1.87881	0	1.96691	0	0	0	0	0
GABA.CGE.VIP.CALB2	4	2.54228	2.51336	0.527901	0	0	0.0193985	0.371923	0	2.07056	0	0.00488503	3.18136	0.124179	0	0	0.657741	0.474509	0.73344	0.616306	0	0.545084	0.0934353	5.98603	0.969107	0	1.51735	0	0	0	0	0	0	0
GABA.CGE.VIP.CALB2	4	2.45288	2.50593	0.178291	0	0	0.00863694	0.796942	0	3.24582	0	0	0.947297	0	0	0.0171999	0	0	0.381225	0	0	0.884838	0.60581	5.84864	2.94782	0	2.2099	0	0	0	0	0.911338	0	0
GABA.CGE.VIP.CALB2	4	4.01745	2.16889	0.576759	0	0	0.0242403	0.223361	0	0.807165	0	0	2.80942	0	0	0	0	0	0	0.587725	0	1.27159	0.627807	6.01974	1.72506	0	2.3425	0	3.08649	0	0	2.04801	0	0
GABA.CGE.VIP.CALB2	4	2.88427	2.00499	0.412675	0	0	0.0369507	1.14086	0	2.28978	0	0.005363	1.11651	0	0	0	0	0	0.0160035	0.72239	0	0.0923908	0.833489	5.83611	0	0.005363	2.94661	0	3.29384	0	0	1.13742	0	0
GABA.CGE.VIP.CALB2	4	2.88595	1.4145	0.455116	0	0.00527374	0.0209301	0	0	1.49117	0	0	1.92783	0	0	0	0	0	0.671447	0	0.00527374	1.74983	0	5.85511	1.6514	0.00527374	1.47678	0	0.0105198	0	0	0	0	0
GABA.CGE.VIP.CALB2	4	3.96427	2.39477	0.403598	0	0	0.0107507	0.0213871	0	0.336418	0	0	2.43581	0.673953	0	0	0	0.701126	0.191257	0.0213871	0	1.35458	0	5.55421	0.00538982	2.23419	2.81052	0	3.00951	0	0	0.204559	0	0
GABA.CGE.VIP.CALB2	4	4.09802	2.12566	0.576246	0	0	0.0137397	0.0317706	0	0.416399	0	0	2.16875	1.57815	0	0.498113	0.00460092	0	1.3635	0.188567	0	0.244272	0.492492	4.7187	0.466802	2.35267	1.90757	0	1.51329	0	0	0.419435	0	0
GABA.CGE.VIP.CALB2	4	3.85207	2.54612	0.324326	0	0	0.0225474	0.445304	0	1.91307	0	0.00455033	1.78388	0.163705	0.00455033	0	0	1.44304	0.824857	0	0	1.69165	0.739347	5.60879	0.850511	0.00455033	2.70235	0	2.76631	0	0	1.47901	0	0
GABA.CGE.VIP.CALB2	4	3.87532	2.34743	0.410683	0	0	0.0135114	0.211707	0.640696	1.69528	0	0	2.43536	0.477561	0	0.00902782	0	1.24058	0	0	0	1.07246	1.22071	6.32578	2.59469	0	2.47277	0	3.73322	0	0.548139	0.948753	0	0
GABA.CGE.VIP.CALB2	4	4.2997	2.00318	0.622267	0	0	0.0231842	0.10246	0	0.00933829	0	0	2.25328	1.38333	0	0.642209	0	0.567944	0	0	0	0.0277573	1.69163	5.37686	1.34863	0	2.16039	0	2.77006	0	0	0.818269	0	0
GABA.CGE.VIP.CALB2	4	3.02552	1.23954	0.92358	0	0	0.0404534	0.77458	0	1.10316	0	0.104439	2.32747	0	0	0	0.00457649	0	0.780902	0.0316041	0	0.594373	1.04681	5.79862	3.90064	2.04618	2.06787	0	0	0	0.438537	0	0	0
GABA.CGE.VIP.CALB2	4	2.86011	2.43105	0.195712	0	0	0.0225004	0.765071	0	2.69854	0	0	2.25777	0	0	0.00567273	0	0	0.310485	0.656111	0	0.673666	0.716252	5.80698	0	0	2.43004	0	0	0	0.496426	0	0	0
GABA.CGE.VIP.CALB2	4	2.77745	2.75924	0.451048	0	0	0.00516804	0.166658	0	2.93155	0	0.00516804	1.82239	1.46595	0	0	0.0103095	0	1.78048	0.0306151	0	1.09862	0.9678	5.70664	0	0.0205138	2.33773	0	1.9628	0	0	1.26965	0	0
GABA.CGE.VIP.CALB2	4	3.63307	1.86695	0.301091	0	0	0.010132	0.642508	0	1.55655	0	0	1.75373	0.304852	0	0	0	1.15825	0.246897	0.359631	0	1.582	2.23923	6.34622	2.30839	3.57972	2.88221	0	2.49825	0.00507885	0	1.53923	0	0
GABA.CGE.VIP.CALB2	4	3.17954	2.17707	0.325139	0	0	0.0117529	0.142965	0	1.48938	0	0.00589372	1.97172	0	0	0	0	0	0	0.0795094	0	1.52731	0.00589372	6.3559	0.511599	4.12163	2.62321	0	2.10049	0.0117529	0	1.09596	0	0
GABA.CGE.VIP.CALB2	4	3.00042	1.81727	0.322499	0	0	0.0038368	0.271078	0	1.84377	0	0	1.7561	0	0	0	0	0	0.00765894	0.149674	0	1.81226	0	5.38425	1.18537	0.0038368	1.94492	0	0.808934	0	0	0.837621	0.126233	0
GABA.CGE.VIP.CALB2	4	3.29024	1.29776	0.343856	0	0	0	0.246254	0	0.906848	0	0	0	0	0	0	0	0	0	0.319566	0	1.26726	2.03865	5.43333	0	0.00422175	1.96137	0	0.38211	0	0	0.771697	0	0
GABA.CGE.VIP.CALB2	4	3.11119	1.04632	0.47021	0	0	0	0.397061	0	0.0051179	0	0	2.29069	0.680515	0.0051179	0.0051179	0	0	1.0318	0	0	0.865046	1.50507	6.04958	2.6759	0.0051179	2.7527	0	0	0	0	0.648841	0	0
GABA.CGE.VIP.CALB2	4	3.45399	2.36458	0.303716	0	0	0.00442623	0.382391	0	0.360978	0	0	0	0	0	0	0	0	0	0.667477	0	1.35786	0	6.05055	0	0.00442623	1.44938	0	0.444007	0	0	0	0	0
GABA.CGE.VIP.CALB2	4	3.08986	2.31445	0.225449	0	0	0	0.139472	0	0.531737	0	0	1.16592	0	0	0	0	0	0.768277	0	0	0.82187	1.45931	6.04842	1.99301	3.43217	2.60725	0	1.97312	0	0	1.1929	0	0
GABA.CGE.VIP.CALB2	4	2.52484	2.19466	0.751331	0	0	0	1.08307	0	0.721672	0	0	2.43048	0.0822925	0	0.619357	0	0.353541	0.479155	0.12944	0	1.42535	1.88621	5.54635	3.35391	0	2.42627	0	0	0	0	0	0	0
GABA.CGE.VIP.CALB2	4	2.78496	1.94454	0.28434	0	0	0	0.36497	0	2.10988	0	0	0.787585	0	0	0	0.00585577	0	0	0.0459133	0	1.38949	0.619205	5.63666	0	0	2.06992	0	0.625509	0	0	0	0	0
GABA.CGE.VIP.CALB2	4	2.89026	2.00052	0.608598	0	0	0	0.617921	0	2.49404	0	0	0	0	0	0	0	0.00572231	0.00572231	0.793385	0	0.775049	1.2385	5.33633	0.0114121	0.00572231	1.9512	0	2.58243	0	0	0.471605	0	0
GABA.CGE.VIP.CALB2	4	2.58414	1.76323	0.155644	0	0	0.00524902	0.71909	0	2.10344	0	0	0	0	0	0	0	0.246023	0	0.859962	0	1.37699	0.00524902	5.19858	0.25013	0.658307	2.05744	0	0.0953043	0	0	0.711368	0	0
GABA.CGE.VIP.CALB2	4	3.01922	0.905854	0.341442	0	0	0	0.00987727	0	1.25033	0	0	2.252	0	0	0	0.00495083	0.393002	0.467233	0.419451	0	1.13918	1.18422	5.85686	3.00383	0	1.798	0	0	0.00495083	0	0	0	0
GABA.CGE.VIP.CALB2	4	2.67246	1.50118	0.57127	0	0	0.00560844	1.02752	0	0.351934	0	0.17969	1.91422	0	0	0.650628	0.00560844	0.0222475	0.311574	0.958783	0	1.12158	0.984327	5.66217	3.57865	0.00560844	2.31309	0	0	0	0.273802	0	0	0
GABA.CGE.VIP.CALB2	4	2.85803	2.28106	0.394985	0	0	0.00455905	0.508365	0	2.37672	0	0	1.72628	0	0	0	0	0	0.00455905	0.707113	0	1.0713	0.29128	5.10444	3.1848	0.0136153	1.15964	0	0.00455905	0.00455905	0	0	0	0
GABA.CGE.VIP.CALB2	4	2.78045	2.19927	0.382981	0	0	0.00567473	0.318888	0	3.14783	0	0	0.390712	0	0	0	0.00567473	0	0.741145	0.0445209	0	1.05114	0	5.73926	0	2.79551	2.47828	0	3.10002	0	0.237023	0.741145	0	0
GABA.CGE.VIP.CALB2	4	3.53207	2.4406	0.137154	0	0	0.00943946	0	0.00473087	1.76987	0	0	2.02952	0.705218	0	0.0463307	0	0.00473087	0	0.784021	0	0.999392	1.22363	5.96082	3.40349	1.30143	2.62699	0	2.05171	0	0	0	0	0
GABA.CGE.VIP.CALB2	4	3.62662	2.47148	0.273707	0	0	0	0.227232	0	1.2123	0	0	2.61514	0.684351	0	0.155525	0.00541342	1.40421	1.1778	0.461363	0	0.485035	1.24566	6.10098	3.09897	2.32085	1.96712	0	2.57338	0.00541342	0	0.740258	0	0
GABA.CGE.VIP.CALB2	4	2.39843	2.1615	0.418569	0	0	0.0129109	0.727496	0	1.3824	0	0	1.2313	0.137387	0	0	0.0129109	0.00432219	0	0.083082	0	0.37785	0	5.24594	0	0	1.54369	0	0	0	0	0	0	0
GABA.CGE.VIP.CALB2	4	3.19264	0.543631	0.281956	0	0	0	0.415114	0	0	0	0.357376	2.63063	0.184806	0	0	0	0.296099	1.03917	0.0506232	0	1.17628	0.929874	5.66777	3.0851	0.00470948	1.55676	0	0.184806	0	0	0.00470948	0	0
GABA.CGE.VIP.CALB2	4	3.91306	2.01606	0.343647	0	0	0.00524367	0.199517	0	0.00524367	0	0	2.19801	0.0807677	0	0.578498	0.00524367	0.630203	2.03273	1.33004	0	0.53327	1.61382	6.01812	0.436171	4.0694	3.05346	0	3.2399	0.00524367	0	1.00611	0	0
GABA.CGE.VIP.CALB2	4	3.0867	1.86346	0.364412	0	0	0.0288898	0.415993	0	2.85661	0	0	1.57079	0	0	0	0	0	0.0116563	0.372523	0	0.95566	1.54612	6.31522	0.00584511	0	2.75605	0	3.6461	0.00584511	0.0624906	0.00584511	0	0
GABA.CGE.VIP.CALB2	4	3.58631	2.4535	0.576922	0	0	0	0	0	0.833308	0	0	0.818541	1.20502	0	0	0	0	0.00959029	0.172196	0	1.3195	1.20646	5.96099	0	0	2.15548	0	2.9862	0	0.250194	1.27473	0	0
GABA.CGE.VIP.CALB2	4	2.72448	2.1859	0.269836	0	0	0	0.623278	0	0	0	0	0	0.402022	0	0	0.00377032	0.00752647	0.6131	0.993194	0	0.12083	0	6.07629	0	0.00752647	2.21724	0	3.18967	0	0	0	0	0
GABA.CGE.VIP.CALB2	4	2.89967	1.26854	0.21418	0	0	0.0189274	0.377465	0	1.16233	0	0.229486	2.36908	0	0	0.49476	0	0.344167	0.811618	0.292043	0	0.459184	1.07496	6.23471	2.1098	0.00476553	1.97015	0	1.61291	0	0	0.531924	0	0
GABA.CGE.VIP.CALB2	4	3.17643	1.41255	0.740906	0	0	0.00979789	0.795698	0	1.39928	0	0	1.87694	0	0	0.0894178	0.00491094	0.00491094	0.397016	0.102833	0	1.79533	0.353034	5.59145	3.09647	0.00491094	1.584	0	0	0.00491094	0	0.48867	0	0
GABA.CGE.VIP.CALB2	4	3.54878	1.87465	0.892126	0	0	0.0104965	0.0761626	0	0.600503	0	0	0.470909	0.506507	0	0	0	0	0	0.457644	0	0.519143	1.75074	5.37284	0	0.005262	2.22193	0	2.22364	0	0	0	0	0
GABA.CGE.VIP.CALB2	4	2.05122	1.44505	0.332671	0	0	0	0	0	1.23589	0	0	0.513404	0	0	0	0	0	0	0	0	0.303963	0	5.19897	0.755033	0.00562257	1.87054	0	0	0	0	1.01698	0	0
GABA.CGE.VIP.CALB2	4	2.78877	2.41942	0.209732	0	0	0.0184957	0.819521	0	2.4609	0	0	2.62308	0	0	0	0	0	0	0.186767	0	1.28983	0.755842	5.55394	1.18136	0	1.75261	0	0	0	0	0.815399	0	0
GABA.CGE.VIP.CALB2	4	3.56228	2.37434	0.354708	0	0	0	0.256155	0	1.80179	0	0	1.72895	0	0	0	0	0	0.311111	0.0240381	0	0.346139	1.25446	6.11014	2.94783	0	2.62447	0	3.09363	0	0	0.562019	0	0
GABA.CGE.VIP.CALB2	4	3.54607	1.62987	0.325158	0	0	0	0.634005	0	0.542596	0	0	0	0.387606	0	0	0	0.51017	1.43121	0.215237	0	0.585531	2.06024	5.71242	2.7583	3.62077	3.03177	0	0	0	0	1.83134	0	0
GABA.CGE.VIP.CALB2	4	3.59315	1.6679	0.489079	0	0	0	1.3496	0	1.30706	0	0	1.59382	0	0	0	0	0.445966	1.00918	0.278496	0	0.608277	1.40457	5.56995	0.747885	2.62465	2.77914	0	1.21274	0	0	1.10479	0	0
GABA.CGE.VIP.CALB2	4	2.58792	1.64727	0.129347	0	0	0	0.532379	0	2.30891	0	0	1.41725	0	0	0	0	0	2.18135	1.57718	0	0.750111	0.390027	6.10964	2.66333	0.0124751	2.78822	0	0	0.0124751	0	0.463734	0	0
GABA.CGE.VIP.CALB2	4	3.12117	2.22504	0.686087	0	0	0	1.22616	0	1.86862	0	0	1.52301	0	0	0	0	0	0.569738	0.608462	0	0.107441	0.677261	6.30208	1.57491	0.175591	2.53404	0	3.12578	0	0	0.806009	0	0
GABA.CGE.VIP.CALB2	4	2.83111	1.91267	0.376513	0	0	0	0.555036	0	3.01612	0	0.411884	1.02382	0	0	0	0	0.0222359	0.00746703	1.09148	0	1.29766	0.645475	5.69522	0	0	1.96759	0	0.912886	0	0	0.971309	0.0148787	0
GABA.CGE.VIP.CALB2	4	2.72591	1.51239	0.373344	0	0	0	0	0	0	0	0	0.584632	0	0	0	0	0	1.4537	0.113394	0	0.903646	1.33221	5.29349	0	0	1.61667	0	2.76505	0	0	0	0	0
GABA.CGE.VIP.CALB2	4	3.33496	2.79313	0.957451	0	0	0	1.05688	0	2.98875	0	0	1.85636	0.609868	0	0	0	0	0	0.0172338	0	1.03654	0.656018	5.13563	0.438557	0	1.89803	0	0	0	0.302663	0.774943	0.272237	0
GABA.CGE.VIP.CALB2	4	3.60075	2.76951	0.415618	0	0	0.00693947	0.363745	0	3.21623	0	0	1.38139	1.10045	0	0	0	0.0274736	0	0.0342256	0	0.848874	0.644623	5.95733	0	0.00693947	2.14983	0	0	0	0	0	0	0
GABA.CGE.VIP.CALB2	4	3.25723	2.12076	0.576002	0	0	0	0.463164	0	1.20891	0	0.117218	1.35752	0.0258451	0	0	0	0.253092	0.253092	0.0936563	0	0.910605	1.51461	5.18158	0	0	1.86038	0	0	0	0.151551	0.307486	0	0
GABA.CGE.VIP.CALB2	4	2.90281	1.63498	0.283906	0	0	0	0.289383	0	0.373173	0	0	1.7453	1.00129	0	0	0	0	0	0.310998	0	1.44783	0.878828	5.59705	0.00726924	0	1.74403	0	0	0	0	0	0	0
GABA.CGE.VIP.CALB2	4	3.17424	2.14201	0.745559	0	0	0	0.0877042	0	2.2769	0	0	1.9121	0	0	0	0	0	0	0	0	1.08626	0.638551	5.47375	1.93	0	2.41093	0	1.65477	0	0.712396	1.08109	0	0
GABA.CGE.VIP.CALB2	4	2.16133	1.84035	0.378959	0	0	0	0.0863146	0	2.33848	0	0	0.315258	0	0	0	0	0	0	0.525405	0	1.29043	0.761689	4.86579	0	0.00996674	2.78347	0	2.14505	0	0	0	0	0
GABA.CGE.VIP.CALB2	4	3.23604	2.06449	0.249186	0	0	0	0.0602646	0	2.31222	0	0	2.06098	0	0	0	0	0	0	0.0667419	0	1.47118	0	5.2434	0.0731775	0	1.22838	0	0.0859257	0	0	0.153276	0	0
GABA.CGE.VIP.CALB2	4	3.27394	0.624144	0.382641	0	0	0.00654406	0.682218	0	1.28456	0	0	2.1258	0.253776	0	0	0	0	0	0.0195051	0	1.3255	2.01225	5.33107	3.517	0	2.16799	0	0	0	0	0.0574097	0	0
GABA.CGE.VIP.CALB2	4	2.73233	1.31196	0.470709	0	0	0	0.0488797	0	1.45227	0	0.306755	2.0504	0.22352	0	0	0	0	0	0.394905	0	1.63238	0.168627	5.32837	2.48663	0	0.819361	0	0.00831435	0	0	0	0.318967	0
GABA.CGE.VIP.CALB2	4	2.39961	1.85209	0.504992	0	0	0.0116634	1.28216	0	1.91279	0	0	0.9447	0	0	0	0	0	0	0	0	0.96278	1.92997	5.07333	0	1.76562	2.38567	0	2.57851	0	0	0.539781	0	0
GABA.CGE.VIP.CALB2	4	3.34416	1.82262	0.289948	0	0	0	0.0101411	0	0.0301198	0	0	0	0	0	0	0	0.398271	1.62071	0.185527	0	0.808039	1.51895	5.24381	0	4.22558	3.06604	0	2.66036	0	0	0.0783871	0	0
GABA.CGE.VIP.CALB2	4	3.3132	2.48459	0.1622	0	0	0	0	0	2.0299	0	0	1.06736	0	0	0	0	0	0	0	0	0.102208	0	5.4255	0	0.687173	2.66266	0	2.41799	0	0.672301	0	0	0
GABA.CGE.VIP.CALB2	4	3.05653	2.79175	0.207435	0	0	0	0.187865	0	1.54845	0	0	1.83198	0	0	0.0235667	0	0	0.207435	0.799365	0	1.79702	0	4.82253	2.46562	0.0764876	1.74147	0	0	0	0	0	0.957691	0
GABA.CGE.VIP.CALB2	4	3.06738	0.0225189	1.43774	0	0	0	0.343546	0	1.78397	0	0	1.04145	0	0	0.107842	0	0	0	0	0	1.45384	0	5.82444	0.540807	0.0225189	2.30672	0	2.5139	0	0	0.118013	0	0
GABA.CGE.VIP.CALB2	4	2.24643	1.84745	0.596537	0	0	0	0	0	2.58304	0	0	0.585242	0	0	0	0	0	0.177106	0.982989	0	1.56087	1.68362	5.3463	0	0	2.48264	0	2.85811	0	0	0	0	0
GABA.CGE.VIP.CALB2	4	3.23077	0.951636	0.106606	0	0	0	0.805339	0	0.703079	0	0	0.974537	0	0	0	0	0.340027	0.244897	0.524714	0	1.34414	1.09942	5.2403	0.329294	0.133214	1.98887	0	1.50959	0	0	1.26056	0	0
GABA.CGE.VIP.CALB2	4	2.52134	2.01861	0.703087	0	0	0.0106794	0.262845	0	0.631486	0	0	0	0	0	0	0	0	1.61893	0.82785	0.0106794	0.841827	1.4726	5.04381	0	3.97972	2.62297	0.220694	0.823148	0	0	0.140034	0	0
GABA.CGE.VIP.CALB2	4	3.45198	1.82437	0.466774	0	0	0	0.503393	0	1.81473	0	0	1.19274	0	0	0	0	0	0.278551	1.09419	0	1.30204	0.32259	5.49943	0	2.32668	2.63503	0	2.97344	0	0	1.48487	0	0
GABA.CGE.VIP.CALB2	4	2.9905	0.0584363	0.0198606	0	0	0.00997962	1.44446	0	0.51401	0	0	2.06691	0	0	0	0	0	0.525935	0	0	1.14942	0	5.84713	2.27271	2.05284	1.56258	0	0	0	0	0	0	0
GABA.CGE.VIP.CALB2	4	2.80892	1.60438	0.122501	0	0	0	1.46614	0	0.973662	0	0	2.63335	0.201639	0	0	0	0	1.12357	0	0	1.23514	0	6.18624	3.03671	0	2.71178	0	0	0	0	0.00926555	0	0
GABA.CGE.VIP.CALB2	4	3.40383	1.97095	0.22082	0	0	0	0	0	2.33757	0	0	2.06782	0	0	0.36328	0	0	0	0	0	0.174743	1.60237	5.51559	0	2.66328	2.80675	0	3.35485	0	0	0	0	0
GABA.CGE.VIP.CALB2	4	3.38609	2.50369	0.010192	0	0	0	0.010192	0	2.78262	0	0	1.5384	0	0	0	0	0	1.22293	0.194848	0	1.58566	1.4463	5.36576	0	0.313926	2.10931	0	2.31323	0	0	0.219825	0	0
GABA.CGE.VIP.CALB2	4	3.26205	1.44153	0.747154	0	0	0	0.480704	0	1.41189	0	0	1.95783	0	0	0.017481	0	0	0.41304	0.574322	0	0.811846	0.700119	5.76105	1.18358	0	1.99089	0	1.22328	0	0	1.23103	0	0
GABA.CGE.VIP.CALB2	4	2.48492	1.6049	0.491073	0	0	0	0.721143	0	0.00956125	0	0	1.61259	0.744229	0	0	0	0	1.02494	0.019032	0	0.0560425	1.84712	6.34939	0.55374	3.64381	2.44156	0	1.78622	0	0.411564	1.27924	0	0
GABA.CGE.VIP.CALB2	4	3.15899	0.288709	0.205555	0	0	0	0.526046	0	1.2	0	0	1.30845	0	0	0	0	0	0.872156	0	0	0.698989	1.22712	5.98064	3.03609	3.36864	2.79474	0	0	0	0	1.17212	0	0
GABA.CGE.VIP.CALB2	4	2.73167	1.7158	0.0511803	0	0	0	0.184443	0	2.74958	0	0	1.86815	0	0	0	0	0	0	0.0222559	0	1.38835	0	5.24861	1.71983	0	1.40136	0	0	0	0	0	0	0
GABA.CGE.VIP.CALB2	4	3.20222	1.17074	0.0662021	0	0	0.00851894	1.29766	0	1.72479	0	0	1.98977	0	0	0	0	0	0.313262	0	0	0.627351	1.64714	5.8836	3.74995	0	1.85605	0	0	0	0	0	0	0
GABA.CGE.VIP.CALB2	4	3.82105	1.85007	0.104943	0	0	0	0.954833	0	1.7654	0	0	2.8572	0	0	0.0596553	0.0711709	0	0	0.158812	0	0.573535	0.745014	6.38554	1.60609	0	1.852	0	3.09821	0	0	0.93089	0	0
GABA.CGE.VIP.CALB2	4	2.48045	0.252901	0.113238	0	0	0	0.214947	0	0.881615	0	0	0.825451	0.541969	0.415786	0	0	0.708589	0.582957	0	0	0.0119185	0.731927	5.85023	0	0	2.75057	0	0.95806	0	0	1.29137	0	0
GABA.CGE.VIP.CALB2	4	3.48775	2.20305	0.128085	0	0	0	0.775317	0	1.87107	0	0	1.6253	0.543654	0	0	0	0	0	0	0	0.865525	1.0924	5.92836	3.25271	0	2.05203	0	0.836351	0	0	0.836351	0	0
GABA.CGE.VIP.CALB2	4	3.13885	0.766626	0.651487	0	0	0.0178475	0.142424	0	0.632535	0	0	1.71649	0	0	0	0	0	1.31833	1.1927	0	0.578484	0	5.65384	2.64558	0	1.44913	0	0	0	0	1.78526	0	0
GABA.CGE.VIP.CALB2	4	3.77976	2.21584	0.688953	0	0	0	0.521586	0	0.402671	0	0	2.1424	0	0	0.729607	0	0	0.595839	0.920703	0	0.763185	2.27581	6.00647	1.78278	0	2.51036	0	3.42355	0	0	0	0	0
GABA.CGE.VIP.CALB2	4	3.06534	1.80083	0.165958	0	0	0	0.165958	0	1.1823	0	0	1.44928	0	0	0	0	0	0	0	0	1.59515	1.96392	5.60216	0	0	1.53978	0	0.28457	0	0	0	0	0
GABA.CGE.VIP.CALB2	4	3.68054	2.63195	0.869216	0	0	0	0.361546	0	0	0	0	0	0.167994	0	0.481486	0	0.330736	1.71798	0.0342505	0	0.539003	1.67486	5.09154	0	3.54531	3.12844	0	1.0431	0	0	1.76827	0	0
GABA.CGE.VIP.CALB2	4	2.84033	0	0.342085	0	0	0	0.712997	0	0.97143	0	0	2.91932	0	0	0	0	0	0.349302	0.882687	0	0.1856	0	5.92697	2.28964	0	2.02916	0	0.640452	0	0	1.1703	0	0
GABA.CGE.VIP.CALB2	4	3.77331	2.6794	0.851247	0	0	0	0.480253	0	0.152202	0	0.116268	1.61768	0.103997	0	0	0	0	0.334534	0	0	0.391696	2.52744	5.47722	0	0	2.0482	0	1.98059	0	0.569385	0.561603	0	0
GABA.CGE.VIP.CALB2	4	3.58366	2.10551	0.336551	0	0	0	0.349755	0	1.26156	0	0	1.81422	0.216664	0	0	0	0	0.962811	0.246193	0	1.13533	1.30539	6.06236	2.65415	2.9174	2.00923	0	1.05116	0	0.329883	1.54232	0	0
GABA.CGE.VIP.CALB2	4	3.06375	2.61704	0.420107	0	0	0.0293993	0.0857254	0	2.19012	0	0	1.40805	0	0	0.189669	0	0.565774	0.548685	0	0	0.306034	1.35176	6.28095	3.15366	0	2.93449	0	2.62787	0	0	0.0719385	0	0
GABA.CGE.VIP.CALB2	4	4.23645	2.93206	0.745512	0	0	0.0151606	0.0593105	0	0	0	0	0	0.0806753	0	0.301105	0.646544	0.85524	0.443133	0.14216	0	0.670267	1.19132	5.04642	0.0946691	2.11834	2.71418	0	2.18236	0	0	1.57099	0	0
GABA.CGE.VIP.CALB2	4	3.6352	2.86613	0.0525879	0	0	0	0	0	2.54657	0	0	2.2031	0	0	0	0	0	0.663234	0	0	0.936264	1.71537	5.31288	1.83675	2.57634	2.46802	0	3.02643	0	0	1.76939	0	0
GABA.CGE.VIP.CALB2	4	2.58836	2.14822	0.609835	0	0	0.0248915	0.0806697	0	1.6126	0	0	1.40277	0.302216	0	0	0	0.0411481	0	0.0330528	0	1.02585	2.08759	5.67771	0	0	1.594	0	1.52513	0	0	0	0	0
GABA.CGE.VIP.CALB2	4	2.74138	0.541764	0.217966	0	0	0	0.281206	0	1.14598	0	0	1.23077	0	0	0	0	0	0.541764	0.822292	0	0.867137	0	5.40986	2.14592	0	0.357047	0	0.0115306	0	0	0.876835	0	0
GABA.CGE.VIP.CALB2	4	2.15496	2.12174	0.494741	0	0	0.00759104	0	0	2.37665	0	0	3.25901	0	0	0	0	0	0	0.69985	0	1.00977	0	5.24689	2.62533	0.00759104	1.31176	0	0	0	0	0.882654	0	0
GABA.CGE.VIP.CALB2	4	3.3266	1.98027	0.17432	0	0	0.00790354	0.00790354	0	0	0	0	2.05007	1.16746	0	0	0	0	0	0.140425	0	1.17484	1.8765	5.81794	2.27014	0	2.47941	0	0.491514	0	0	0	0	0
GABA.CGE.VIP.CALB2	4	2.93416	1.59801	0.30001	0	0	0	0.0094116	0	2.394	0	0	0.479113	0	0	0	0	0	0	0	0	1.12196	2.39227	5.29677	2.95111	1.48255	2.44857	0	3.17556	0	0	1.10644	0	0
GABA.CGE.VIP.CALB2	4	3.54674	1.94691	0.49727	0	0	0	0.486624	0	0.719496	0	0	1.75582	0.265975	0	0.816398	0	0.816398	0.985896	0.773146	0	0.773146	0.804786	6.02906	0.00866809	3.31325	2.7644	0	2.10939	0	0	1.92556	0	0
GABA.CGE.VIP.CALB2	4	2.79073	0.69608	0.374304	0	0	0	0.617641	0	1.2326	0	0	1.93177	0	0	0.0176465	0	0.156259	1.14022	0.0263543	0	1.05408	1.69902	5.88813	3.46781	0	1.69902	0	0	0	0	0.805277	0	0
GABA.CGE.VIP.CALB2	4	2.95432	0.964407	0.349687	0	0	0	0.458024	0	1.28252	0	0	1.90314	0	0	0.0580833	0	0	0.300309	0.00850704	0	1.27539	1.25368	5.74983	2.44751	0	1.72363	0	0	0	0	1.91076	0	0
GABA.CGE.VIP.CALB2	4	3.70903	2.93679	0.18329	0	0	0	0.834443	0	2.09348	0	0	2.54347	0.40472	0	0	0	0	0.683941	0.303097	0	0.715908	1.79792	5.99896	3.22604	0	1.56651	0	1.71602	0	0.355199	1.12885	0	0
GABA.CGE.VIP.CALB2	4	2.55903	2.19651	0.733866	0	0	0	0.406317	0	1.43831	0	0	1.32601	0.12599	0	0	0	0.0264999	0	0.0437843	0	0.873975	0.60567	5.4256	0	0	1.69211	0	0	0	0	0.565807	0	0
GABA.CGE.VIP.CALB2	4	2.42173	1.29268	0.251871	0	0	0.00919727	0.65439	0	1.31029	0	0	1.77602	0.280196	0	0	0	0	0	0.417013	0	1.19693	0	5.28822	0	0.464577	2.33972	0	3.52757	0	0	0.857913	0	0
GABA.CGE.VIP.CALB2	4	2.74977	2.22758	0.542607	0	0	0	0.503794	0	2.59126	0	0	0.991317	0	0	0	0	0	0.307664	0.447839	0	1.65808	0	5.43587	0	0.00815401	2.23549	0	2.30972	0	0	0.659258	0.624793	0
GABA.CGE.VIP.CALB2	4	3.32013	2.91997	0.27814	0	0	0	0.714019	0	2.65124	0	0	1.67016	0	0	0.134795	0	0	0.30804	0.259762	0	0.547848	0	5.23281	2.12435	0.0771165	1.57692	0	0	0.0469797	0.30804	0.987132	0.00798483	0
GABA.CGE.VIP.CALB2	4	2.64392	1.98403	0.354005	0	0	0.0089969	0.662636	0	1.94475	0	0.119138	1.57524	0.16615	0	0	0	0	0	0.295222	0	1.1953	0	5.82641	0	0	1.48527	0	0	0	0	0	0	0
GABA.CGE.VIP.CALB2	4	2.98471	1.81321	0.639977	0	0	0.00883645	0.00883645	0	2.85148	0	0.625837	0.94083	0	0	0	0	0	0	0.00883645	0	1.04284	0.323279	5.57218	0	0	2.32104	0	0.178367	0	0	0	0	0
GABA.CGE.VIP.CALB2	4	3.13002	2.14945	0.490106	0	0	0	0.119114	0	1.77567	0	0	2.13575	0	0	0	0	0	0.484127	0	0	0.586624	2.52195	6.23772	0.732414	3.60335	1.87146	0	3.86058	0.00968356	0	0	0	0
GABA.CGE.VIP.CALB2	4	3.85739	2.33607	0.155159	0	0	0	0.807389	0	0	0	0	0.604768	0	0	0	0	0	2.73933	0.270417	0	1.2064	0.572155	4.53219	0	3.95622	3.40243	0	2.40505	0	0	0	0	0
GABA.CGE.VIP.CALB2	4	2.77691	2.71991	0.761767	0	0	0	0.334196	0	3.127	0	0	1.38879	0	0	0	0	0	1.27922	0.775231	0	0.00963192	0.42678	6.00905	2.75438	0	1.5366	0	0	0	0	0.594977	0	0
GABA.CGE.VIP.CALB2	4	2.23212	1.04812	0.132147	0	0	0.00781806	0.40177	0	2.34659	0	0	1.33759	0	0	0	0	0	2.16777	0.125247	0	1.41677	1.15006	5.62081	3.93067	0	2.13119	0	0	0	0	0	0	0
GABA.CGE.VIP.CALB2	4	2.88602	0	0.337672	0	0	0	0	0	2.4307	0	0	1.84306	0	0	0	0	0	1.45438	0	0	0.928143	0.0085101	6.15709	0.893776	0.0169484	1.98182	0	1.79455	0	0	0.0336143	0	0
GABA.CGE.VIP.CALB2	4	2.57934	2.11908	0.172539	0	0	0	0.145772	0	2.18593	0	0	1.10845	0	0	0	0	0	0	0	0	0.927219	2.1741	5.74145	0	0	2.58881	0	2.95621	0	0	0.288772	0	0
GABA.CGE.VIP.CALB2	4	2.79234	0.362865	0.153775	0	0	0	0.0998328	0	1.95857	0	0	1.64349	0	0	0	0	0	0	1.13413	0	1.86822	0	5.82389	0	0	2.76682	0	0.0428145	0	0	0.0428145	0	0
GABA.CGE.VIP.CALB2	4	2.53615	2.3522	0.233228	0	0	0.0207958	0.394277	0	2.65003	0	0	2.80575	0	0	0	0	0	0	0.670961	0	0.738457	0	5.79734	1.3084	0	1.39276	0	0	0	0	0	0	0
GABA.CGE.VIP.CALB2	4	3.97014	3.01884	0.249596	0	0	0	0.402886	0	1.91287	0	0	2.02496	0	0	0	0	0.0902996	1.33801	0	0	1.00523	1.10655	5.72984	1.75172	1.2958	2.54921	0	2.30351	0	0	0.970035	0	0
GABA.CGE.VIP.CALB2	4	2.93191	2.25057	0.219805	0	0	0	0.436433	0	3.24874	0	0	1.02399	0.257286	0	0	0	0	0.583898	0.232456	0	0.389206	0.618668	6.00955	1.07669	0	2.7131	0	0	0	0	0	0	0
GABA.CGE.VIP.CALB2	4	3.40911	2.98652	0.533784	0	0	0	0.539592	0	2.72305	0	0	2.1177	0	0	0	0.479929	0.138912	1.09758	0	0	0.719347	0.985438	6.06389	2.3874	0	2.0849	0	1.09758	0	0	1.27065	0	0
GABA.CGE.VIP.CALB2	4	3.0659	1.64549	0.533073	0	0	0	0.334788	0	2.24513	0	0	0.690198	0	0	0	0	0	0	0.677656	0	0.82232	0.710757	5.49887	0	0.00825012	2.57539	0	2.55242	0	0	1.26505	0	0
GABA.CGE.VIP.CALB2	4	2.40137	1.76694	0.592676	0	0	0	0	0	2.68748	0	0	1.86083	0	0	0.311617	0	0	0	0.892149	0	0.397103	0	5.07306	3.24723	0	1.11869	0	0	0	0	0	0	0
GABA.CGE.VIP.CALB2	4	2.77249	1.5327	0.585822	0	0	0	0.820783	0	2.61981	0	0	1.20528	0	0	0	0	0.117005	0	1.10084	0	1.19906	1.45371	5.43059	0	0	1.73977	0	2.3724	0	0	0	0	0
GABA.CGE.VIP.CALB2	4	3.27455	2.85997	0.297611	0	0	0	0	0	1.9583	0	0	0	0	0	0.737471	0	0.0811613	0	0.491088	0	1.62268	0.617298	5.40808	0	2.38335	2.45917	0	3.36852	0	0.0414038	0	0	0
GABA.CGE.VIP.CALB2	4	2.27483	2.57996	0.395618	0	0	0	0.413944	0	1.38025	0	0	2.72323	0	0	0	0	0	0	0.0181476	0	0.68759	0	5.63316	0.973878	0	0.370649	0	0	0	0	0	0	0
GABA.CGE.VIP.CALB2	4	2.77823	1.19994	0.277911	0	0	0	0.566596	0	1.8972	0	0	2.28511	0	0	0.208632	0	0	0.717588	0.66786	0	1.70607	0.862828	5.9961	0.597458	0	2.17216	0	2.59157	0	0	1.22296	0	0
GABA.CGE.VIP.CALB2	4	3.67006	1.52019	0.48647	0	0	0.00843144	0.47073	0	0.376532	0	0	2.4237	0	0	0	0	0.0167924	0.476004	0.266061	0	1.39617	0.7543	5.73605	2.56804	0	1.93542	0	0	0	0	1.41896	0	0.12705
GABA.CGE.VIP.CALB2	4	3.12711	1.9237	0.253451	0	0	0	0	0	0.405468	0	0	0	0.304372	0	0	0	0	0	0	0	1.11136	1.76744	5.76902	0	0	2.03018	0	2.17345	0	0.159632	0	0	0
GABA.CGE.VIP.CALB2	4	2.77267	1.56358	0.564511	0	0	0	0	0	1.50667	0	0	0.725339	0	0	0.785399	0	0.171864	0	0	0	1.24713	2.01762	5.86609	0	2.81695	2.76572	0	4.05861	0	0.24118	0.0417341	0	0
GABA.CGE.VIP.CALB2	4	3.44894	2.11654	0.45416	0	0	0	0.798208	0	0.640908	0	0	0.280169	0	0	0	0	0	0.118448	0.069392	0	0.853268	1.75569	5.44569	0.195212	0	2.03545	0	2.68585	0	0	0.0439309	0	0
GABA.CGE.VIP.CALB2	4	3.13824	0.916652	0.0953649	0	0	0	0.322249	0	1.74796	0	0	0.542576	0	0	0	0	0	0.488813	0.0770057	0	0.343765	0	5.81102	0	0.300261	2.18208	0	2.43767	0	0	1.03001	0	0
GABA.CGE.VIP.CALB2	4	3.7176	2.47083	0.508335	0	0	0	0.221899	0	2.23514	0	0	2.20272	0	0	0	0	0.0325892	0.677494	0	0	0.386653	0	5.69509	0	0	1.74982	0	0	0	0.208543	0	0	0
GABA.CGE.VIP.CALB2	4	3.04782	0.654868	0.146615	0	0	0	1.01507	0	1.49491	0	0	1.40682	0	0	0	0	0	1.70139	0.0074913	0	1.54266	0.917843	5.5349	2.59914	0.0074913	2.48624	0	0	0.0149269	0	0.862272	0	0
GABA.CGE.VIP.CALB2	4	2.7599	2.29059	0.218874	0	0	0.0090212	1.20265	0	2.61842	0	0	1.33026	0.354814	0	0	0	0	1.68044	0	0	1.00461	0.616174	5.6234	1.7038	0	2.07666	0	0	0	0	0	0	0
GABA.CGE.VIP.CALB2	4	4.17812	2.32199	0.707738	0	0	0	0.128615	0	1.73912	0	0	1.50406	0	0	0	0	0	0	0.0170111	0	1.30194	1.32044	5.69616	1.62932	0	2.0311	0	3.10497	0	0.350894	0	0	0
GABA.CGE.VIP.CALB2	4	3.23706	2.66046	0.372214	0	0	0	0.462593	0	2.72611	0	0	1.88224	0	0	0	0	0	0.145701	0	0	0.817399	0.980778	6.24092	2.2867	2.44398	2.20691	0	3.20299	0	0.358609	0.492989	0	0
GABA.CGE.VIP.CALB2	4	3.40413	1.15331	0.534422	0	0	0	0.599642	0	1.16875	0	0	0.78066	0	0	0	0	0	0.271673	0.39519	0	0.652348	1.46106	5.63236	1.11634	0.422479	2.4876	0	2.44363	0	0	1.26366	0	0
GABA.CGE.VIP.CALB2	4	2.20297	0.180794	0.517569	0	0	0	0.419693	0	2.14851	0	0	1.98353	0	0	0	0	0	0	0	0	0.937682	0.953885	5.36471	3.11427	0	1.25664	0	0	0	0	0.154332	0	0
GABA.CGE.VIP.CALB2	4	3.40253	0.670156	0.688765	0	0	0	0.76847	0	0.720521	0	0	1.84135	0	0	0.235997	0	0	0.0181901	0.865731	0	1.49107	0.957893	5.68769	0.345731	0	1.30542	0	1.6942	0	0	0	0	0
GABA.CGE.VIP.CALB2	4	3.18794	1.67927	0.465274	0	0	0.0101628	0.818288	0	1.30189	0	0	1.56858	0	0	0	0.0202234	0	0	0.202714	0	1.27371	1.05762	5.46036	0	0	2.48074	0	2.18789	0	0	0.151376	0	0
GABA.CGE.VIP.CALB2	4	3.33933	1.95605	0.466331	0	0	0	0.460491	0	0.932573	0	0	1.61706	0	0	1.2196	0	0.267238	0.975479	0	0	1.07215	0	5.51018	1.14268	3.46999	2.688	0	2.47095	0	0	0.712821	0	0
GABA.CGE.VIP.CALB2	4	3.49453	2.13099	0.458206	0	0	0	0.473837	0	0.848799	0	0.215754	1.32796	0.299171	0	0	0	0.00826907	0	0.0643136	0	1.00324	2.11809	5.13876	0.195474	0	1.99611	0	0	0	0.387499	0	0	0
GABA.CGE.VIP.CALB2	4	3.69636	2.89008	0.113144	0	0	0	0.418122	0	2.44874	0	0	1.49829	0	0	0	0	0.407552	0.00795452	0	0	0.655655	1.8372	5.91226	0	2.83582	2.81976	0	3.14457	0	0	0.98175	0	0
GABA.CGE.VIP.CALB2	4	2.70859	1.74726	0	0	0	0	0	0	2.60334	0	0	2.32132	0.00798644	0	0	0	0	0	0	0	0.0845273	0	5.91547	0	0	0.953843	0	0.786065	0	0	0	0	0
GABA.CGE.VIP.CALB2	4	2.77747	1.40385	0.26613	0	0	0	0	0	2.67084	0	0	0.951605	0	0	0.116372	0	0	0.26613	0	0	1.13311	0	6.22773	3.3363	0	1.38585	0	2.12361	0	0	0.780848	0	0
GABA.CGE.VIP.CALB2	4	3.73317	0.189046	0.147672	0	0	0	0.142378	0	0.0121667	0	0	2.06037	0	0	0	0.00610185	0	0	0.628732	0	0.688899	0.67653	6.11918	0	2.43243	2.45054	0	3.67314	0	0	0	0	0
GABA.CGE.VIP.CALB2	4	2.76968	1.71417	0.154358	0	0	0	0	0	3.12362	0	0	1.90402	0	0	0	0	0	0	0	0	0.929218	0	5.982	0	0.00755814	1.92858	0	2.33154	0	0	1.64487	0	0
GABA.CGE.VIP.CALB2	4	2.12583	1.80907	0	0	0	0	0.11871	0	1.77974	0	0	0.507859	0	0	0	0	0	0	0	0	0.11871	1.49513	5.90063	2.19133	0	2.07729	0	2.26595	0	0	0	0	0
GABA.CGE.VIP.CALB2	4	2.68345	0.725262	0.044643	0	0	0	0.283065	0	0	0	0	0.960547	0	0	0.00758028	0	0	2.36897	0	0	0.161276	1.46972	6.8159	0	4.48991	3.0641	0	3.10517	0	0	0	0	0
GABA.CGE.VIP.CALB2	4	1.47599	1.22176	0.329133	0	0	0	0.0307048	0	3.18436	0	0	1.3689	0	0	0	0	0	0.792207	0.0457107	0	1.87712	0	5.74759	2.68494	0	0.853811	0	0	0	0	0	0	0
GABA.CGE.VIP.CALB2	4	2.94648	1.18678	0.0369978	0	0	0	0	0	0.0726755	0	0	0	0	0	0	0	0	0	0.0223625	0	0.30883	0.31435	5.61217	0	0.00750988	1.56688	0	1.0302	0	0	0	0	0
GABA.CGE.VIP.CALB2	4	3.11238	1.44928	0.16505	0	0	0	0	0	0.874732	0	0.440389	0.514586	0.370619	0	0	0.0221836	1.07725	1.62728	0.391055	0	1.52693	3.43201	5.10977	0	0	1.83481	0	1.2304	0	0	0	0	0
GABA.CGE.VIP.CALB2	4	2.6546	1.78997	0.83871	0	0	0	0.234464	0	0.642639	0	0	0.955868	1.04171	0	0	0.00774144	0	0.350418	0.137724	0	0.658855	2.01967	6.0665	0	0.00774144	1.56217	0	2.4121	0	0.222093	0.424261	0	0
GABA.CGE.VIP.CALB2	4	3.0428	2.17043	0.6555	0	0	0	0.00950218	0	2.49823	0	0	0	0	0	0	0	0	0	0.640517	0	1.34681	1.58242	5.30131	0	2.03406	2.31241	0	3.1836	0.00950218	0	0.0189149	0	0
GABA.CGE.VIP.CALB2	4	2.49887	0	0.0204718	0	0	0.0204718	0.625231	0	1.48682	0	0	2.50733	0	0	0	0	0	1.47506	0.262288	0	1.76999	0.0698895	5.71795	3.43733	0	1.81981	0	0	0	0	0.0698895	0	0
GABA.CGE.VIP.CALB2	4	2.94004	1.8506	0.11486	0	0	0	0.150391	0	2.0224	0	0	1.00668	0	0	0	0.00808168	0	0	0	0	1.58986	0	5.46511	0	0	2.0468	0	1.99409	0	0	0.224381	0	0
GABA.CGE.VIP.CALB2	4	2.93576	2.43823	0.0170044	0	0	0	0.120999	0	1.78876	0	0	1.25631	0	0	0	0	0	0	0	0	1.04507	0	5.67145	0	0	2.24562	0	1.42445	0	1.02681	0	0	0
GABA.CGE.VIP.CALB2	4	2.97696	1.15032	0.502794	0	0	0	0.839253	0	1.26234	0	0.127027	2.49178	0	0	0	0	0.357846	1.20908	0	0	1.28463	0	5.81986	3.35894	0	2.25227	0	0	0	0	0	0	0
GABA.CGE.VIP.CALB2	4	2.86677	1.46945	0.357322	0	0	0.00807104	0.494814	0	0.566306	0	0.879645	1.84437	0.00807104	0	0	0	0.580012	0	0.454486	0	1.33175	0	5.75694	1.62774	0.00807104	1.42367	0	0	0	0	0	0	0
GABA.CGE.VIP.CALB2	4	2.9191	1.1224	0.164247	0	0	0	0.955045	0	1.26353	0	0	2.56544	0	0	0	0	0	1.17169	0.565648	0	1.67348	1.86141	6.42639	3.1701	3.77792	2.58787	0	0.164247	0	0	0.556792	0	0
GABA.CGE.VIP.CALB2	4	2.96977	2.42663	0.327626	0	0	0.00857798	0.455649	0	2.51401	0	0	1.86458	0.0826382	0	0	0	0.450172	0.508831	0.106154	0	1.05711	1.10674	5.46067	0	0	2.209	0	1.06308	0	0	0	0	0
GABA.CGE.VIP.CALB2	4	2.753	2.4148	0.584715	0	0	0.0484616	0.960801	0	2.73436	0	0	1.65737	0.174243	0	0	0.228371	0	0.761771	0.814447	0	1.62856	0.273443	5.68619	0	0.00824178	1.90734	0	0	0	0.780904	0.241457	0	0
GABA.CGE.VIP.CALB2	4	3.59042	2.2736	0.467204	0	0	0.00751005	0.3886	0	1.65278	0	0	0.667741	0	0	0	0	0.072677	0.531254	0	0	0.557495	0.907254	5.89473	3.27381	0.0149641	2.14103	0	0.738625	0	0	1.44669	0	0
GABA.CGE.VIP.CALB2	4	2.8036	1.41549	0.42629	0	0	0	0.818412	0	1.99981	0	0.54608	1.29444	0.132563	0	0	0	0.591229	0	0.758001	0	1.36475	1.43678	5.56285	0	0	2.28573	0	2.83061	0	0.535764	0	0	0
GABA.CGE.VIP.CALB2	4	3.44211	1.59358	0.369552	0	0	0	0.282167	0	0.719066	0	0	0.33684	0.130778	0	0	0.00927118	0.0184572	1.74763	0.00927118	0	0.303021	1.14495	5.54949	0	2.87465	2.93829	0	1.29598	0	0	0.114298	0	0
GABA.CGE.VIP.CALB2	4	2.58915	2.47732	0.31035	0	0	0	0.381552	0	1.3678	0	0	2.06767	0	0	0	0	0	1.26837	0.501005	0	1.22611	0	5.55793	3.18718	0	2.55244	0	0	0	0	0	0	0
GABA.CGE.VIP.CALB2	4	2.68925	1.86848	0.527676	0	0	0.00541491	0.468287	0	2.32323	0	0	1.683	0	0	0	0	0	0.920054	0.294209	0	1.16113	0	5.35404	3.51741	0	1.79277	0	0	0	0	0	0	0
GABA.CGE.VIP.CALB2	4	2.89801	1.70147	0.802319	0	0	0.0182021	0.137106	0	2.57998	0	0	1.47492	0	0	0	0	0	0.46235	0.250538	0	1.15584	0.755972	5.67328	2.12416	0	1.44506	0	0	0	0.698275	0	0	0
GABA.CGE.VIP.CALB2	4	3.36918	2.27926	0.571568	0	0	0	0.0454018	0	1.39568	0	0	0.627663	0.05424	0	0	0.0184088	0.0364849	1.44506	0	0	1.16367	1.50663	5.73295	1.06622	3.06989	2.85358	0	0.528699	0	0	1.16076	0	0
GABA.CGE.VIP.CALB2	4	2.88989	1.85068	0.325895	0	0	0.00983025	0.220715	0	3.02718	0	0	2.30352	0.196662	0	0	0	0	0.00983025	0.0575822	0	1.37716	0	5.85679	0.212761	0	1.03592	0	0	0	0.0482125	0	0	0
GABA.CGE.VIP.CALB2	4	2.66711	2.03982	0.84923	0	0	0	0.466622	0	3.20176	0	0	0.987568	0	0	0	0	0	1.5573	0	0	0.80148	0	5.56588	0.497223	0	1.69007	0	0	0	0.668525	0.0196261	0	0
GABA.CGE.VIP.CALB2	4	3.66966	2.51187	0.176202	0	0	0.00799624	0.419919	0	3.26334	0	0	1.17057	0	0	0	0	0	0	0	0	0.510635	0.674675	6.00966	0	0	1.81058	0	0	0	0	0	0	0
GABA.CGE.VIP.CALB2	4	3.4937	2.92702	0.15638	0	0	0	1.13651	0	2.30226	0	0	1.48597	0	0	0	0	0	0.777686	0.3764	0	0.561473	0.852584	5.61787	0	0	3.42145	0	0.86335	0	0	0.111979	0	0
GABA.CGE.VIP.CALB2	4	3.37374	2.81916	0.980212	0	0	0	0.11137	0	1.71898	0	0	1.0595	0	0	0	0	0.39672	0	0.33124	0	0.0460466	0.39672	5.48954	0	1.87507	2.16926	0	2.58947	0	0	0.46313	0.443162	0
GABA.CGE.VIP.CALB2	4	3.63749	2.45539	0.795374	0	0	0.00864304	0.0257082	0	1.39794	0	0	0.947731	0.0589889	0	0	0	0.160084	1.94193	0	0	0.920445	1.62528	5.78486	1.56542	2.27904	2.87657	0	1.21998	0	0	1.34509	0	0
GABA.CGE.VIP.CALB2	4	3.07389	1.7912	0.770788	0	0	0	0.253416	0	1.36292	0	0	1.57431	0	0	0.0457098	0	0.271403	0	0.664339	0	1.12028	0.847138	5.48478	3.16116	0	1.02428	0	0	0	0	0	0	0
GABA.CGE.VIP.CALB2	4	3.25944	2.27721	0.39083	0	0	0.00881671	0.329052	0	2.79566	0	0	0.976827	0.745247	0	0	0	0	0	0.0848529	0	0.449013	0	5.36418	0	2.29699	2.33629	0	3.09572	0	0.0601444	0.525169	0	0
GABA.CGE.VIP.CALB2	4	2.39772	1.68501	0.3654	0	0	0	0.65655	0	1.79618	0	0.0794621	1.80226	0	0	0	0	0	0.716664	0.850856	0	0.278865	0.716664	6.03499	4.15374	0.566858	1.80529	0	0	0	0	0	0	0
GABA.CGE.VIP.CALB2	4	3.13509	2.31541	0.743649	0	0	0.00808194	0.936056	0	1.53896	0	0	0.34056	0	0	0	0.00808194	0	1.18046	0.157353	0	0.825105	1.28452	5.29627	2.05725	1.65398	2.37526	0	0	0	0	1.53372	0	0
GABA.CGE.VIP.CALB2	4	3.38439	2.69879	0.403246	0	0	0.00898993	0.196168	0.366373	2.15009	0	0	1.3396	0.965265	0	0	0	0	0	0	0	0.99241	0.427094	5.72079	0	0	2.40984	0	2.9362	0	0	0.624292	0	0
GABA.CGE.VIP.CALB2	4	3.00139	2.48772	0.092315	0	0	0.00875342	0.146913	0	2.97526	0	0	2.6499	0.463139	0	0	0	0	0	0	0	1.2443	0.837241	5.78595	1.90952	0	0.844824	0	0	0	0	0.301344	0	0
GABA.CGE.VIP.CALB2	4	2.97037	2.10081	0.616746	0	0	0	0.17912	0	1.28602	0	0	1.22529	0.721532	0	0	0	0	0	0.777942	0	1.84539	1.05058	5.73335	0	0	2.23535	0	2.38973	0	0	0.00849273	0	0
GABA.CGE.VIP.CALB2	4	3.3079	2.24535	1.27216	0	0	0.00735376	0.891698	0	1.62563	0	0	0	0	0	0.468659	0	0	0.181724	0.150469	0	1.92684	1.59015	4.88444	0	1.46528	2.44325	0	3.77596	0	0.657514	1.24914	0	0
GABA.CGE.VIP.CALB2	4	3.23446	2.3839	0.31507	0	0	0.00723562	0.220663	0	2.93842	0	0	0.767622	0.376721	0.00723562	0.00723562	0	0	0.282758	0	0	0.537465	1.56212	5.63326	1.67978	1.87361	2.90678	0	2.80844	0	0.320355	0.784333	0	0
GABA.CGE.VIP.CALB2	4	2.04942	0.0217913	0.152917	0	0	0	0.6777	0	0.793751	0	0	1.23704	0	0	0	0.0217913	0	0	1.53364	0	0.906662	0	5.62413	1.87128	0	0.884167	0	0	0	0	0.431618	0	0
GABA.CGE.VIP.CALB2	4	2.45287	0.790248	0.367111	0	0	0.0311912	0	0	1.85659	0	0	2.12893	0	0	0	0	0	0	0.772115	0	2.08658	0	5.04287	2.97096	0	1.2536	0	0	0	0	0	0	0
GABA.CGE.VIP.CALB2	4	2.76991	2.45527	0.588575	0	0	0.00767642	0.421342	0	2.3953	0	0	1.68642	0	0	0	0	0	0	0.658774	0	1.60158	1.24297	5.92417	2.02563	0	1.86737	0	0.320337	0	0	1.09207	0	0
GABA.CGE.VIP.CALB2	4	3.10635	2.43697	0.905259	0	0	0.00649467	0.776037	0	2.4799	0	0	1.25892	0	0	0	0.00649467	0	1.0007	0.0129474	0	0.770022	0	5.65886	0.733148	0	2.14156	0	0	0	0	1.30767	0	0
GABA.CGE.VIP.CALB2	4	2.73406	2.3819	0.461667	0	0	0.00822967	0.451197	0	1.03603	0	0	0	0	0	0	0	0	2.61022	0	0	1.34186	1.82019	5.55407	2.28162	3.84068	3.16896	0	0	0	0	0.917881	0	0
GABA.CGE.VIP.CALB2	4	2.75597	1.54167	0.0832391	0	0	0.0198332	0.226121	0	1.58775	0	1.00162	1.31844	0.355806	0	0	0	0.423624	0.00665486	0.457996	0	1.09519	0.487133	4.96932	1.96518	0.00665486	1.49036	0	0	0.00665486	0	0.199132	0	0
GABA.CGE.VIP.CALB2	4	2.57347	1.88028	0	0	0	0.0074391	0.651502	0	2.17677	0	0	0.84227	0	0	0	0	0	0	0	0	0.751428	0	4.88115	2.64542	0.0074391	0.553435	0	0	0	0	0	0	0
GABA.CGE.VIP.CALB2	4	2.56213	1.66707	0.280866	0	0	0	0.76386	0	1.39196	0	0	2.04644	0	0	0	0	0	0.561205	0.0886061	0	0.994158	0.208335	5.91903	2.45273	0	2.22418	0	0	0	0	0.932286	0	0
GABA.CGE.VIP.CALB2	4	3.56276	1.34082	0.630214	0	0	0	0.245092	0	1.17275	0	0	1.77811	0.259018	0	0.149512	0	0	0	1.26791	0	0	1.88156	5.84917	2.49325	2.66682	1.67453	0	3.03582	0	0	1.18652	0	0
GABA.CGE.VIP.CALB2	4	2.94247	2.08961	0.917164	0	0	0.0157711	0.602456	0	0.0312973	0	0	0.80643	0	0	0.00791664	0	0	0	0.251638	0	1.43582	1.05907	5.66102	0	0	2.41426	0	1.66919	0	0	0	0	0
GABA.CGE.VIP.CALB2	4	3.28712	1.70172	0.615712	0	0	0.0156359	0.58546	0	2.58001	0	0	2.20914	0	0	0	0	0	0	0	0	0.940053	0	5.85926	0	0	1.86325	0	0.0078485	0	0	0.558782	0	0
GABA.CGE.VIP.CALB2	4	3.14911	2.27775	0.503359	0	0	0	0.228755	0	1.71497	0	1.04591	1.66908	0	0	0	0.00775874	0.651852	0.00775874	0.306227	0.00775874	1.10952	0.647786	4.90707	1.96211	0.0306802	1.71076	0	0	0	0	0	0.679867	0
GABA.CGE.VIP.CALB2	4	3.34986	1.94936	0.815347	0	0	0	0.615441	0	1.67208	0	0.0758007	1.70554	0	0	0	0	0.199255	0	0.478859	0	1.59043	0.598273	5.69197	0	0.0156268	1.84425	0	1.60478	0	0	0.26178	0	0
GABA.CGE.VIP.CALB2	4	3.26798	2.48735	0.550882	0	0	0	0.243372	0	2.34025	0	0	1.85329	0	0	0	0	0	1.19277	0	0	0.362055	1.04273	5.70428	3.00018	0	1.58526	0	0.231299	0	0	0.413974	0	0
GABA.CGE.VIP.CALB2	4	3.38857	1.22939	0.0466411	0	0	0	0.93052	0	2.42667	0	0	2.06778	0	0	0.239458	0	0	0.678457	0	0	0.0313345	0	5.9509	2.11495	2.1655	2.79327	0	3.50628	0	0	1.05433	0	0
GABA.CGE.VIP.CALB2	4	3.3709	2.2093	1.17668	0	0	0	0.553017	0	2.18507	0	0	0.854578	0	0	0	0	0.58878	0.0139685	0.0613765	0	1.00951	0.634558	5.5498	0	0.00700862	1.38709	0	0	0	0	0	0	0
GABA.CGE.VIP.CALB2	4	2.89875	2.00301	0.327332	0	0	0.151442	0.935719	0	0.553942	0	0	2.65151	0.548984	0	0	0	0	0.988328	0	0	0.345771	1.81304	6.23907	2.94462	3.83256	2.98195	0	2.14763	0	0.033844	0.0170652	0	0
GABA.CGE.VIP.CALB2	4	3.36747	1.82982	0.304031	0	0	0	0.221255	0	1.96984	0	0	1.67707	0	0	0	0	0	0.824735	0	0.0107095	1.67304	0	5.35872	2.57851	0.0107095	1.37919	0	0.0213055	0	0	0.632811	0	0
GABA.CGE.VIP.CALB2	4	2.87764	1.18732	0.354532	0	0	0	1.05757	0	1.30936	0	0	1.71338	0	0	1.22448	0	0	0	0.770709	0	1.34924	0	6.1183	0.980803	2.73299	2.09414	0	2.65759	0	0.0767609	1.13172	0	0
GABA.CGE.VIP.CALB2	4	3.38207	1.51236	0.204989	0	0	0	0.354639	0	1.6965	0	0	0.969495	0	0	0.385058	0	0	1.41028	0	0	0.558807	1.80719	6.15977	2.912	0	0.879254	0	3.29075	0	0	0.607945	0	0
GABA.CGE.VIP.CALB2	4	2.16912	1.97906	0.476123	0	0	0	0.0290805	0	2.68927	0	0	1.54928	0	0	0	0	0	0	0.00978775	0	1.16416	0.0757441	5.01471	0	0.00978775	1.69845	0	2.92349	0	0	0	0	0
GABA.CGE.VIP.CALB2	4	3.22164	1.97786	0.20622	0	0	0.0215773	0	0	0.597705	0	0	0	0	0	0	0	0	0.585635	0	0	0.585635	0	4.74246	0	1.73671	0.783327	0	3.54168	0	0	0.20622	0	0
GABA.CGE.VIP.CALB2	4	3.27801	2.15448	0.348026	0	0	0.008129	0.178892	0	1.9925	0	0	1.5862	0	0	0	0	0.008129	0	0.158204	0	1.03679	0	5.75546	2.50598	0.008129	1.08206	0	0	0	0	0.282533	0	0
GABA.CGE.VIP.CALB2	4	2.73516	1.32937	0.900031	0	0	0	0.067982	0	2.1287	0	0	0.506513	0.45207	0	0	0	0	1.70833	0.621511	0	0.568158	1.73194	5.93157	3.43464	3.92366	2.67216	0	0	0	0	0.339674	0	0
GABA.CGE.VIP.CALB2	4	3.6128	1.72603	0.181383	0	0	0	0.866001	0	0.0073387	0	0.0218565	1.55018	0.539105	0.0146239	0	0	0	1.17759	0.495193	0	1.3191	0.637238	5.59052	0.712245	3.599	3.08599	0	1.73386	0	0	1.30322	0	0
GABA.CGE.VIP.CALB2	4	2.6566	2.13884	0.0471888	0	0	0	0.0548416	0	2.90594	0	0	2.14263	0	0	0	0	0	1.44206	0.00802106	0	0.0159783	1.35039	5.75607	0	0.00802106	1.44206	0	0.121202	0	0	0	0	0
GABA.CGE.VIP.CALB2	4	2.32071	0.935706	0.437036	0	0	0.00791227	0	0	2.52592	0	0	0.780977	0	0	0	0	0.00791227	0	0.610867	0	0.482182	0.73253	5.06439	0	0.0157624	2.48837	0	2.26949	0	0	0.334458	0	0
GABA.CGE.VIP.CALB2	4	3.45362	1.87431	0.718196	0	0	0	0.918072	0	0.161372	0	0.0765914	2.14734	1.11113	0	0	0	0.22055	0.817863	0.512013	0	1.30144	2.42624	5.66826	2.6975	2.4975	2.9535	0	0	0	0	0.77845	0	0
GABA.CGE.VIP.CALB2	4	3.76566	1.71617	0.341801	0	0	0	0.284863	0	1.56719	0	0	1.6022	0	0	0	0	0	0	0	0	1.31869	1.81262	5.95561	0.709848	2.12401	2.59445	0	2.75323	0	0.180443	0.42352	0	0
GABA.CGE.VIP.CALB2	4	3.21625	2.03728	0.519609	0	0	0	0.847562	0	1.74593	0	0	2.07172	0	0	0.855752	0	0	0	0.296753	0	0.352245	0	6.07936	1.90075	0	2.23014	0	2.75197	0	0	1.72392	0	0
GABA.CGE.VIP.CALB2	4	2.33835	1.79155	0.315013	0	0	0.00969697	0.429135	0	1.35944	0	0	2.28724	0	0	0	0	0	0	0	0	2.07776	0	5.46511	2.49711	0	0.778885	0	0	0	0	0	0	0
GABA.CGE.VIP.CALB2	4	3.46011	1.62451	0.698706	0	0	0	0.889708	0	2.42477	0	0	0	0.325035	0	0	0	0.55655	0	0.325035	0	1.62142	2.0636	4.96394	0	0	2.37061	0	3.49947	0	0.422106	0.702595	0	0
GABA.CGE.VIP.CALB2	4	3.01084	1.25163	0.798169	0	0	0	0.576	0	0.540549	0	0	2.07072	0	0	0	0	0	0.769882	0.0262072	0	0.132448	2.54171	6.0264	0	0	2.25564	0	2.67768	0	0	1.42973	0.00881228	0
GABA.CGE.VIP.CALB2	4	3.18037	0.921312	0.286049	0	0	0	0.244871	0	1.80709	0	0.629739	1.02284	0.15705	0	0.44142	0	0.0089104	0	0	0	1.55061	0	5.00623	2.44766	0	1.42538	0	0	0	0	0	0	0
GABA.CGE.VIP.CALB2	4	3.87009	1.52444	0.357925	0	0	0	0.574655	0	0.0276802	0	0	1.37296	0.833097	0	0.503737	0	0.837156	0	0.261887	0	0.311059	1.14202	5.56274	1.27596	0	2.24681	0	3.28851	0	0	0.761454	0	0
GABA.CGE.VIP.CALB2	4	3.28836	2.11615	0.400168	0	0	0.011648	0.0457993	0	2.17242	0	0	1.74833	0.171814	0	0	0	0.229327	0.802086	0.0569288	0	0.843254	1.16397	5.64082	0.301202	0	2.40159	0	2.80338	0	0.011648	0	0	0
GABA.CGE.VIP.CALB2	4	3.66289	2.03416	0.341728	0	0	0	0.672197	0	2.23679	0	0	1.53867	0.474414	0	0	0	0.423432	1.29088	0	0	0.508615	1.66117	5.7158	1.36903	0.672197	2.55551	0	1.50909	0	0	1.51262	0.0842177	0
GABA.CGE.VIP.CALB2	4	3.2124	2.015	0.494675	0	0	0	0.831505	0	2.79633	0	0	1.94647	0	0	0	0	0	0.509962	0.016701	0	0.915837	0.25177	5.70585	1.11666	0	1.74319	0	0	0	0.258295	0.681474	0.0492887	0
GABA.CGE.VIP.CALB2	4	3.58116	1.86717	0.601845	0	0	0.0179799	0.428663	0	1.00193	0	0	1.83584	0.862789	0	0	0	0.723355	1.64866	0.486072	0	0.611735	0.513586	5.39255	0.32935	1.19516	2.26455	0	2.35718	0	0	1.27431	0.398674	0
GABA.CGE.VIP.CALB2	4	3.35517	1.74913	0.673204	0	0	0.0298037	0.0868718	0	0	0	0	2.67154	0	0.00753461	0	0	0.862432	0.0224356	0.0224356	0	0.0515876	0.890761	6.4433	1.78021	3.11023	2.38877	0	3.22421	0	0	1.72112	0	0
GABA.CGE.VIP.CALB2	4	2.80282	1.24882	0.544159	0	0	0	0.112909	0	0.288695	0	0.0748242	2.00723	0	0	0	0	0.946936	0	0	0	1.13261	0	5.6359	3.30654	0	2.61653	0	0.0118821	0	0	0	0	0
GABA.CGE.VIP.CALB2	4	3.63179	2.15744	0.738881	0	0	0	0.19577	0	0.866176	0	0.00615947	0.175241	0.170042	0.619936	0	0	0.0657534	0	0.185558	0	0.442159	0.19577	5.27267	0.00615947	1.9062	2.38914	0	3.13341	0	0	1.22841	0	0
GABA.CGE.VIP.CALB2	4	3.12314	1.4788	0.191324	0	0	0	0.463975	0	0.432552	0.290699	0	0	0	0	0	0	0	2.52841	0.197111	0	1.15429	0.536415	6.21987	0	4.42895	3.71935	0	2.1233	0	0	0	0	0
GABA.CGE.VIP.CALB2	4	3.40039	1.20238	0.479897	0	0	0.0112377	0.112133	0	1.07585	0	0	2.07745	0.64103	0	0.101979	0	0.0168095	0.0112377	0.0278609	0	2.25942	1.37789	6.2556	2.40519	2.58061	2.64763	0	3.0649	0	0	1.17309	0	0
GABA.CGE.VIP.CALB2	4	2.70079	2.00955	0.995416	0	0	0.0147245	0.921483	0.00738937	2.24812	0	0	1.46388	0	0	0.182532	0	0	0.00738937	0	0	1.20929	0	5.1381	0	1.94168	1.86887	0	2.97445	0	0.809156	0	0	0
GABA.CGE.VIP.CALB2	4	3.20077	1.09016	0.53459	0	0	0.0798706	0.593704	0	0.287123	0	0	2.53527	1.31455	0	0	0	0	0.0205736	0.458708	0	0.971594	1.58234	6.2633	2.95431	0	2.86009	0	0	0	0	0.255428	0	0
GABA.CGE.VIP.CALB2	4	3.62393	1.07316	0.384406	0	0	0.0109688	0.649939	0	0.226077	0	0.00549946	2.96879	0	0	0.099644	0	0	0	0.21724	0	1.40675	1.65119	5.75081	2.94152	0	1.75556	0	0.0164085	0	0.289973	0.326438	0	0
GABA.CGE.VIP.CALB2	4	2.6048	0.546579	0.379112	0	0	0.0401593	0.808555	0	1.51052	0	0	1.0771	0	0	0	0	0	0.494854	0.0692545	0	1.25993	1.05416	5.76892	3.51687	0.005109	2.66433	0	0.005109	0	0	0	0	0
GABA.CGE.VIP.CALB2	4	2.87991	2.65549	0.272554	0	0	0.0166454	1.06549	0	2.46224	0	0.0166454	3.06151	0.493365	0.00557931	0	0	0	0.807399	0.0221329	0	1.12171	1.21723	6.18685	0	0	2.30783	0	0.797367	0	0	1.37476	0	0
GABA.CGE.VIP.CALB2	4	2.56701	0.744913	0.379418	0	0	0	0.886126	0	1.01199	0	0.00589839	0.415202	0.434542	0	0	0.497634	0.00589839	2.37319	0.426851	0	0.876323	0.812775	5.58487	3.66909	3.19978	2.55789	0	0.00589839	0	0	1.05822	0	0
GABA.CGE.VIP.CALB2	4	2.49692	2.17809	0.69355	0	0	0.00678513	0.394325	0	1.74006	0	0	1.47789	0.327912	0	0	0	0.690141	0	0.0202188	0	0.256774	0	5.67525	0.00678513	1.97061	2.58795	0	2.23358	0	0	0	0	0
GABA.CGE.VIP.CALB2	4	1.97353	0.588709	0.318169	0	0	0	0.584542	0	1.20299	0	0.00746423	2.19657	0	0	0	0	0	1.33357	0.781049	0	1.16399	0	5.39555	3.38972	0	2.49657	0	0	0	0	0.739007	0	0
GABA.CGE.VIP.CALB2	4	2.77346	1.90392	0.773836	0	0	0.0141442	0.5378	0	1.53615	0	0.256204	1.82674	0.525243	0	0	0	0.163868	0	0.858819	0	0.157804	0	5.33458	0	0	1.18976	0	0	0	0	0	0	0
GABA.CGE.VIP.CALB2	4	2.65734	1.89707	0.320737	0	0	0.011568	0.608533	0	0.642763	0	0	1.22797	0	0	0	0	0	0	1.11059	0	0.981947	0	5.53912	0	0	0.476761	0	0.00580074	0	0.651898	0	0	0
GABA.CGE.VIP.CALB2	4	2.31254	1.35421	0.736456	0	0	0.0123635	0.733473	0.00620085	3.0782	0	0.00620085	2.41988	0.724472	0	0	0	0	1.08916	0.0777585	0	0.361449	1.02654	5.53224	0.49889	0	1.3827	0	0	0	0	0.326168	0.0426196	0
GABA.CGE.VIP.CALB2	4	3.12935	1.85483	0.389904	0	0	0.0510125	0.678604	0	1.9028	0	0	1.64949	0	0	0.378021	0	0	0.432306	0.0674543	0	0.494491	0.125529	5.93359	3.44611	0	2.17321	0	2.86769	0	0	0.542949	0	0
GABA.CGE.VIP.CALB2	4	3.48601	1.80222	0.249224	0	0	0.00626985	0.21937	0	2.09508	0	0	1.79598	0.209218	0	0.432367	0	0	0.573019	0.0125006	0	0.944834	1.8518	6.02246	2.8494	0	2.34148	0	2.98565	0	0	0.727173	0	0
GABA.CGE.VIP.CALB2	4	3.13786	1.47162	0.520084	0	0	0.0401147	0.663406	0	2.35616	0	0	1.74288	0.308624	0	0	0.00679853	0	0.883318	0	0	0.627636	1.10726	6.07328	0.0335397	0	2.00774	0	2.21471	0	0	1.31055	0	0
GABA.CGE.VIP.CALB2	4	3.12905	1.43261	0.680453	0	0	0	0.132691	0	1.23278	0	0	2.16113	0.384498	0	0	0	0.0941377	0	0.0828438	0	0.803743	1.02794	6.2467	2.26435	0	2.60811	0	3.28543	0	0	1.35135	0	0
GABA.CGE.VIP.CALB2	4	3.42715	1.86498	0.137703	0	0	0.00668826	0.48495	0	1.93618	0	0.00668826	1.69053	0.459845	0	0	0	0	0.641449	0.210969	0	1.85242	0	5.51137	1.68805	0.00668826	2.51293	0	3.10608	0	0.468284	0	0	0
GABA.CGE.VIP.CALB2	4	3.36917	1.85177	0.0421124	0	0	0	0	0	1.1527	0	0	0.229579	0	0	0	0	0	0.819272	0.121363	0	1.28898	1.08237	4.90422	0.75568	0	1.55306	0	2.97099	0	0	0.632197	0	0
GABA.CGE.VIP.CALB2	4	2.69527	0.922499	0.270519	0	0	0	0.67063	0	1.50029	0	0.222709	1.49185	0	0	0.0046957	0	0.715347	0	0.696762	0	0.928097	0.0186519	5.16343	1.45848	0.0046957	1.7081	0	0.0046957	0	0	0	0	0
GABA.CGE.VIP.CALB2	4	3.53548	1.09912	0.240717	0	0	0	0.20441	0	1.33973	0	0	1.5075	0	0	0	0	0	0	0.683558	0	0.714558	1.70511	6.07386	1.03877	2.63956	2.3929	0	3.86335	0.00565401	0	0.0605025	0	0
GABA.CGE.VIP.CALB2	4	2.87969	1.45454	0.15682	0	0	0.0124982	0.745145	0	1.31786	0	0	2.44303	0	0	0	0	0	0.10723	0	0	0.742156	0	4.97324	0	0.0248422	0.468372	0	0.0248422	0	0	0.342697	0	0
GABA.CGE.VIP.CALB2	4	3.36815	2.17029	0.607934	0	0	0	0.862129	0	2.39519	0	0.00461164	2.16128	0	0	0	0	0	0.935491	0.036311	0	1.2289	0.222826	5.46831	2.84926	0	1.65429	0	1.2084	0	0	1.72509	0	0
GABA.CGE.VIP.CALB2	4	2.54782	2.01529	0.105216	0	0	0.00614499	0	0	2.64562	0	0	1.74424	0	0.00614499	0	0	0.00614499	0	0.0713592	0	0.625463	1.03615	4.58919	3.3832	0.00614499	1.25525	0	0	0	0	0	0	0
GABA.CGE.VIP.CALB2	4	3.24733	2.23919	0.17348	0	0	0.0125501	0.489473	0	2.81036	0	0	0.830509	0	0	0	0	0	0.00629471	0.429662	0	0.669622	1.13229	5.90384	0	0	2.20428	0	3.15291	0	0.904742	0	0	0
GABA.CGE.VIP.CALB2	4	3.26008	1.64169	0.39057	0	0	0.107748	0.205008	0	1.29182	0	0	2.4194	0.0224985	0	0.0660316	0	0	2.49351	0.682288	0	0.167232	2.3261	6.27788	1.51001	3.27137	2.76368	0	2.18041	0	0.0224985	0.978704	0	0
GABA.CGE.VIP.CALB2	4	2.93151	0.902044	0.722996	0	0	0	1.16558	0	0.690976	0	0	2.27225	0	0	0	0.0143268	0.646623	0	0.184002	0	1.34992	0.00718905	5.90766	3.03137	0.00718905	2.255	0	0	0	0	0.627546	0	0
GABA.CGE.VIP.CALB2	4	2.88976	1.62001	0.328012	0	0	0.0130737	0.337447	0	1.91062	0	0	1.4251	0.418579	0	0	0	0.100095	0.174636	0.0941244	0	1.01407	0.00655821	5.88242	2.06297	3.24112	1.72028	0	3.04746	0	0	0.0259787	0	0
GABA.CGE.VIP.CALB2	4	3.1593	1.04972	0.283024	0	0	0	0.385243	0	1.47222	0	0.113147	1.93917	0	0	0.00917292	0	0.346904	0.00459698	0.366257	0	1.00012	0.428189	5.23763	3.30062	0	1.41233	0	0	0	0	0.573276	0	0
GABA.CGE.VIP.CALB2	4	2.76716	2.10942	0.507604	0	0	0.00616141	0.250214	0	2.82342	0	0	1.17474	0	0	0	0	0	0.240542	0.730152	0	1.3903	0.0942978	5.72874	3.18231	0	1.7593	0	0.00616141	0	0	0	0	0
GABA.CGE.VIP.CALB2	4	3.04568	1.77723	0.0319795	0	0	0.00647825	0	0	0.690338	0	0	1.51482	0	0	0.093025	0	0	0.846877	0.116437	0	0.194313	0.0129148	5.92314	0.520236	2.81943	3.03198	0	3.70249	0	0	0	0	0
GABA.CGE.VIP.CALB2	4	2.85316	0.994981	0.146662	0	0	0	1.50295	0	2.15657	0	0.0637421	1.7015	0	0	0	0.0130776	0	0.00656018	0	0	0.0881432	1.02613	6.02829	1.20295	0.00656018	2.58191	0	0.328097	0	0	0.489713	0	0
GABA.CGE.VIP.CALB2	4	3.01586	0.508281	0.429212	0	0	0.0172822	0.905448	0	1.5345	0	0.00434864	1.91123	0	0	0	0	0.00434864	1.11172	0.373797	0	0.373797	0.965299	5.43842	3.503	0	0.900147	0	0.00434864	0	0	1.12737	0	0
GABA.CGE.VIP.CALB2	4	3.36715	1.40097	0.216029	0	0	0.00471706	0.403103	0	1.00449	0	0	0.581998	1.05019	0	0	0	0.107487	0.406258	0.77156	0	0.61321	2.10311	5.36448	0	0.00471706	2.21184	0	1.92131	0	0	0	0.303517	0
GABA.CGE.VIP.CALB2	4	3.94081	1.0301	0.514785	0	0	0.00444888	0.445844	0	0	0	0	1.88913	0	0	1.02211	0	0.522747	0.0976278	0.121602	0	0.606387	2.10316	5.66364	1.65468	2.94257	2.66776	0	3.72782	0	0	0.964319	0	0
GABA.CGE.VIP.CALB2	4	2.92544	1.74386	0.209865	0	0	0.00612624	0	0	2.13898	0	0	0.823372	0	0	0	0.00612624	0	0	1.36267	0	0.898687	0.163993	5.18255	0	0	1.19525	0	0	0	0.0242829	0.115915	0	0
GABA.CGE.VIP.CALB2	4	2.5911	1.34331	0.317456	0	0	0	0.718845	0	2.62728	0	0.00490413	1.36489	0.00490413	0	0	0.00978432	0	0.00978432	0.247033	0	1.59294	0.869769	5.32006	3.20584	0.00490413	0.869769	0	0.00978432	0	0	0	0	0
GABA.CGE.VIP.CALB2	4	3.4867	1.30597	0.35957	0	0	0	0.467689	0	2.48907	0	0	1.51195	0	0	0	0	0.0104987	0.246611	0.406341	0	0.691822	0.427211	5.19793	0	1.3074	2.27773	0	2.7878	0	0	0.930432	0	0
GABA.CGE.VIP.CALB2	4	2.27572	0.272072	0.248751	0	0	0	0.356749	0	1.77102	0	0	1.28018	0	0	0	0	0	0.42826	0.298611	0	0.935418	1.2941	5.66843	2.50276	0	1.87136	0	0.00503058	0	0	0.637981	0.624569	0
GABA.CGE.VIP.CALB2	4	4.36149	2.62696	0.443966	0	0	0.0112272	0.547101	0	0.00562936	0	0	0.560082	0.112033	0	0	0	0.792123	0.500291	0.610385	0	0.619541	0.631621	5.32687	0	2.65552	2.93022	0	2.34065	0	0	1.64323	0	0
GABA.CGE.VIP.CALB2	4	3.17509	0.837107	0.291624	0	0	0	0.901382	0	2.12266	0	0	0.942045	0	0	0.24772	0	0.237696	0.744429	0	0	0.726053	0.597599	5.63932	2.43927	0	1.67124	0	2.02133	0	0.0314437	0	0	0
GABA.CGE.VIP.CALB2	4	2.8403	1.1082	0.483687	0	0	0.0172901	0.856347	0	1.10243	0	0	2.2068	0.185211	0	0	0	0	0	0	0	1.4591	0.345544	5.89867	3.50433	0.00579666	2.62561	0	0	0	0	0.135699	0	0
GABA.CGE.VIP.CALB2	4	2.95055	1.20959	0	0	0	0.00567906	0.259399	0	2.07652	0	0	2.42049	0	0	0	0.0113261	0	0	0.181765	0	1.04965	0	5.45793	0.975169	0.00567906	1.09829	0	0	0	0	0.167417	0	0
GABA.CGE.VIP.CALB2	4	3.86288	1.62696	0.749322	0	0	0.0301871	0.0766676	0	0.575738	0	0	2.70065	1.23534	0	0.0594896	0.00611077	0	0.791864	0	0.00611077	0.626145	1.07944	6.18346	0.276671	2.8997	2.44711	0	3.51679	0	0	0.0991221	0	0
GABA.CGE.VIP.CALB2	4	2.83716	1.57384	0.383002	0	0	0	0	0	2.40772	0	0	1.13411	0	0	0	0.00829906	1.28096	0.427455	0	0	1.76789	0.672109	5.4454	0	2.04772	2.35061	0	2.67991	0	0.780869	0.00829906	0	0
GABA.CGE.VIP.CALB2	4	3.15173	2.14293	0.659796	0	0	0	0.743977	0	2.55629	0	0	2.12973	0	0	0	0	0	0	0	0	0.617304	1.14185	5.45891	0	0.00446084	1.96862	0	0.292506	0	0	1.08307	0	0
GABA.CGE.VIP.CALB2	4	1.97498	2.14731	0.941521	0	0	0.00611412	0.626401	0	3.27461	0	0	2.09285	0	0	0	0.00611412	0	1.41028	0.671272	0	0.696037	0.909931	5.64705	2.83685	0.00611412	2.52024	0	0	0	0	0.219388	0	0
GABA.CGE.VIP.CALB2	4	2.68079	1.99729	0.0727002	0	0	0.0172522	0.683251	0	2.25412	0	0	1.71234	0	0	0	0	0	0.962554	0	0	1.53031	0	5.894	1.68151	0	2.41362	0	1.42025	0	0	0	0	0
GABA.CGE.VIP.CALB2	4	2.70733	1.49539	0.460925	0	0	0.00578069	1.35169	0	0.937548	0	0	1.34113	0	0	0	0	0	1.77574	0	0	0.482627	1.11018	5.57841	3.50913	0	2.44025	0	0	0	0	0.0672559	0	0
GABA.CGE.VIP.CALB2	4	3.22316	1.78719	0.313331	0	0	0.00989613	0.0485294	0	2.08952	0	0	1.95959	0	0	0.0049603	0	0	0.0049603	0.542924	0	0.647099	0.680384	4.89191	2.46053	0	0.534218	0	0	0	0	1.18098	0	0
GABA.CGE.VIP.CALB2	4	2.92696	1.47767	0.292937	0	0	0.00692207	0.0474775	0	2.28032	0	0	0	0.261349	0	0	0	0	0	0	0	1.91896	1.47609	4.97855	0	2.00112	2.32069	0	3.68162	0	0	0.245174	0	0
GABA.CGE.VIP.CALB2	4	3.24399	1.61153	0.352174	0	0	0	0.675456	0	1.18035	0	0	2.2605	0	0	0	0	0.0921167	0	0.0471187	0	1.41095	1.99885	6.03521	0	3.73832	2.65716	1.17664	3.2293	0.0179307	0	0.74653	0	0
GABA.CGE.VIP.CALB2	4	2.63222	1.95118	0.244412	0	0	0	0.355815	0	2.20047	0	0	1.07981	0	0	0	0	0	0.00600087	0.674487	0	1.56567	0	4.64632	2.42092	0	0.588073	0	0	0	0	0	0	0
GABA.CGE.VIP.CALB2	4	3.42337	2.23131	0.360052	0	0	0.00514631	0.125882	0	2.98471	0	0	1.07136	0.0697443	0	0	0	0	0.217125	0.107518	0	1.04993	1.02617	5.08453	0	1.50367	2.16073	0	3.27514	0	0	0.488253	0	0
GABA.CGE.VIP.CALB2	4	3.19827	2.07476	0.404171	0	0	0	0.380136	0	1.87788	0	0	0.895451	0.330262	0	0	0	0	0.383606	0.146305	0	0.6861	1.12449	5.75417	0	1.97624	2.04628	0	3.83246	0	0.193471	0.531422	0	0
GABA.CGE.VIP.CALB2	4	2.89486	1.30778	0.231979	0	0	0.0136482	0.209944	0	1.16987	0	0	1.60093	0.761069	0	0.087655	0.00911944	0.338677	0.29531	0.657446	0	0.833293	1.22653	6.1316	2.08447	2.30221	2.66328	0	3.0737	0	0.417133	1.21844	0	0
GABA.CGE.VIP.CALB2	4	3.57895	2.14206	0.142408	0	0	0.0232728	0.397819	0	0.00586918	0	0	1.78347	0.126975	0	0.172579	0	0	0	0.83074	0	0.591359	0.702283	5.91013	0	0.00586918	2.49092	0	3.44504	0	0	0.0117041	0	0
GABA.CGE.VIP.CALB2	4	2.33253	1.71143	0.090572	0	0	0	1.07032	0	0	0	0	2.45718	0.91217	0	0	0	0	1.64703	0.853359	0	0.766001	2.47728	5.70961	2.72794	0	2.86502	0	0	0	0	0	0	0
GABA.CGE.VIP.CALB2	4	3.00514	2.79865	0.418911	0	0	0.00563956	0.557628	0	1.98945	0	0	2.09087	0	0	0	0	0	0.00563956	0	0	0.544591	0	5.53316	0	0	2.53005	0	2.47828	0	0	0.373244	0	0
GABA.CGE.VIP.CALB2	4	2.90036	2.95738	0.522453	0	0	0.0053463	0.705015	0	1.83911	0	0	1.88083	0.418697	0	0	0	0	0.0053463	0.493423	0	1.19869	0	5.49999	0	0	2.20472	0	0	0	0	0.55375	0	0
GABA.CGE.VIP.CALB2	4	3.37333	1.9184	0.326733	0	0	0.00675661	0.296954	0	1.36486	0	0.00675661	1.54646	0	0	0	0	0	0.185138	0.0201344	0	0.91288	0	6.00066	2.95365	0	1.4415	0	3.00767	0	0	0	0	0
GABA.CGE.VIP.CALB2	4	3.18198	2.54113	0.116883	0	0	0.0446673	0.122673	0	1.44226	0	0	1.73446	0	0	0.00650451	0	0	0.829464	0.012967	0	0.111061	1.88792	5.95718	2.96136	2.05074	2.31093	0	2.64319	0	0	0.631788	0	0
GABA.CGE.VIP.CALB2	4	2.73476	1.74885	0.098614	0	0	0.0128718	0.71436	0	1.96308	0	0	2.14398	0	0	0	0	0	0.155648	0.177581	0	0.596728	0.733206	5.85168	3.43932	0	2.71694	0	0	0	0	0.0808494	0	0
GABA.CGE.VIP.CALB2	4	2.70616	2.51791	0.232909	0	0	0.069085	0.593682	0	2.29666	0	0	1.18873	0	0	0	0	0	1.66613	0.149227	0	1.46877	1.18873	5.98001	1.82801	0	2.30144	0	1.12307	0	0	0.035139	0.666668	0
GABA.CGE.VIP.CALB2	4	3.92689	3.045	0.80177	0	0	0.016778	0.666542	0	0.533553	0	0	0.951825	0.0495123	0	0	0	0.414243	0.816834	0.0387195	0	1.27306	1.51705	5.37228	1.87768	1.89817	2.78393	0	1.80153	0	0	2.3072	0	0
GABA.CGE.VIP.CALB2	4	2.84044	2.25167	0.369201	0	0	0.0138591	0.0846952	0	3.17606	0	0	1.74263	0	0.00464107	0	0.521067	0	0.501539	1.24954	0	1.4796	0.919167	5.03098	3.00236	0	1.48066	0	0.0092607	0	0	0	0	0
GABA.CGE.VIP.CALB2	4	3.01777	1.74472	0.0131282	0	0	0.0260863	0	0	2.95543	0	0	0	0	0	0	0.00658566	0	0	0	0	0.980228	0.124117	5.05507	0	0	2.05653	0	2.54017	0	0	1.07478	0	0
GABA.CGE.VIP.CALB2	4	2.85691	1.27967	0.401483	0	0	0.0069342	0.40613	0	0.979465	0	0	0	0	0	0	0.02066	0	1.4033	0.673069	0	0.424503	1.9808	5.17069	0	2.38444	2.42711	0	3.97852	0	0	1.41182	0	0
GABA.CGE.VIP.CALB2	4	2.16188	1.06641	0.330402	0	0	0	0.88813	0	1.81279	0	0	1.89869	0	0	0.00750116	0	0.00750116	0.51739	0.239849	0	1.13405	0	5.50321	3.93585	0	1.41699	0	0	0	0	0	0	0
GABA.CGE.VIP.CALB2	4	2.73005	2.6852	0.0411746	0	0	0.0411746	0.54962	0	2.85781	0	0	2.52086	1.27762	0.00598691	0	0	0	1.12222	0.0119382	0	1.61647	0.632715	5.97302	0.875108	0	1.95429	0	0	0	0	0	0	0
GABA.CGE.VIP.CALB2	4	3.14986	0.804287	0.427448	0	0	0.022208	0.42378	0	1.95808	0	0.0055984	0.913628	0.155655	0	0	0	0.234173	0.277635	0.207159	0	0.752746	2.02325	5.44958	0	0.0055984	2.29123	0	2.83322	0	0	0.723223	0	0
GABA.CGE.VIP.CALB2	4	3.25184	1.91357	0.303334	0	0	0.0159793	0	0	1.78256	0	0	0.777422	0.194553	0	0	0	0.971906	0	0.765007	0	0.315157	2.696	5.61572	0	0	2.55082	0	2.08163	0	0	0	0	0
GABA.CGE.VIP.CALB2	4	1.97541	1.97038	0.196243	0	0	0.0119737	0.267861	0	1.19414	0	0	1.56115	0	0	0	0	0	0.00600479	0.0119737	0	1.83289	0	5.12225	0	0.0119737	1.83578	0	0.425275	0	0	0.0179073	0	0
GABA.CGE.VIP.CALB2	4	2.8385	2.26193	0.283478	0	0	0	0.0304505	0	0.551508	0	0	1.11207	0	0	0	0	0.774143	0.507819	0	0	0.0658079	0	5.66836	0	0	1.11815	0	0.788299	0	0	0.0122917	0	0
GABA.CGE.VIP.CALB2	4	2.85569	1.26439	0.0381545	0	0	0	0.618217	0	2.28065	0	0	0	0	0	0	0	0.672602	1.24405	1.16233	0	0.086863	0.0255974	5.97647	0	0	3.07836	0	2.54465	0	0.00646103	1.02103	0	0
GABA.CGE.VIP.CALB2	4	3.46298	2.39293	0.0979451	0	0	0	0.0403363	0	1.19388	0	0	0	0.165581	0	0	1.16702	0.620164	3.01463	0.545494	0	0.284643	0.00513192	3.18632	0	3.81363	3.63565	0	2.88	0	0	0	0	0
GABA.CGE.VIP.CALB2	4	2.81623	2.50862	0.245036	0	0	0.0551193	0.0919713	0	3.56566	0	0	1.86867	0.615186	0	0	0	0	1.91314	0	0	1.17681	0	5.77705	0.969895	0	2.30302	0.00565067	0.00565067	0	0	1.06998	0	0.00565067
GABA.CGE.VIP.CALB2	4	3.35724	2.14344	0.647641	0	0	0	0.706872	0	3.14885	0	0	2.37098	0.283651	0	0	0	0	0.673987	0.0144712	0.00726178	0.869099	0.735222	5.72317	0	0.0144712	1.78317	0	0	0	0	1.22313	0	0
GABA.CGE.VIP.CALB2	4	2.98336	2.49502	0.403492	0	0	0	0.228361	0	2.16779	0	0	0.956805	1.02428	0	0	0	0	1.09287	0	0	0.0571268	0.511667	5.78941	2.11698	2.1474	3.05563	0	1.86098	0	0.407056	0.290209	0	0
GABA.CGE.VIP.CALB2	4	2.83028	2.23457	0.420937	0	0	0	0.010518	0	2.23117	0	0	1.97574	0	0	0	0	0	0	0	0	1.08029	0.671363	4.91306	2.89985	0	1.37372	0	0.00527283	0	0	0.690097	0	0
GABA.CGE.VIP.CALB2	4	3.3742	0	0.229288	0	0	0	1.32716	0	1.95803	0	0	0.556082	0	0	0	0	0	1.59415	1.08983	0	1.36076	0	5.69269	0	0.0174181	2.27308	0	2.10534	0	0	0.464707	0	0
GABA.CGE.VIP.CALB2	4	3.41702	1.21527	0.505811	0	0	0.00607715	0.413456	0	1.58575	0	0.213279	2.11877	0.397199	0	0	0	0.610418	0	0.0476135	0	1.75949	0	5.57515	3.68	0.00607715	1.27664	0	0.00607715	0	0	0	0	0
GABA.CGE.VIP.CALB2	4	2.69991	1.21763	0.430575	0	0	0.0483765	0.773959	0	0.479973	0	0.323795	2.09212	0.656269	0.00705586	0	0	0.780469	0	0	0	0.855451	2.02339	5.83396	3.72062	0.00705586	1.99779	0	0	0	0	0	0	0
GABA.CGE.VIP.CALB2	4	2.77873	1.66752	0.254697	0	0	0.0786401	0.525738	0	1.71815	0	0.243099	2.41233	0	0	0	0	0.0365138	0.471537	0.00741019	0	1.36686	0.516906	5.38849	3.45875	0	0.419131	0	0.00741019	0.00741019	0	0.00741019	0	0
GABA.CGE.VIP.CALB2	4	3.20737	1.97471	0.0394626	0	0	0	0.139332	0	2.14054	0	0	1.00671	0.439559	0	0	0	0	1.53097	0	0	1.01716	1.51971	5.3413	2.2279	0	2.28099	0	2.93431	0	0	0	0	0
GABA.CGE.VIP.CALB2	4	3.02905	1.38546	0.235547	0	0	0.0396221	0.529831	0	2.03415	0	0.109283	1.52544	0	0	0	0	0	0.30174	0.718256	0	1.28685	0.992338	5.49	1.0051	0	2.29753	0	1.53916	0	0	0.812237	0	0
GABA.CGE.VIP.CALB2	4	3.08291	2.96824	0.334784	0	0	0	0.11592	0	2.31705	0	0	1.31911	0	0.00720379	0	0	0	0.709936	0.45181	0	1.3589	1.21317	5.50131	0.00720379	0	2.70543	0	2.51664	0	0	0	0	0
GABA.CGE.VIP.CALB2	4	3.21737	0.971721	0.247835	0	0	0.0111871	0.690954	0	0.756412	0	0	0	0.0056092	0	0	0	0	2.34498	0.0440166	0	1.06901	2.53136	6.01421	2.72186	4.04644	2.67492	0	1.28681	0	0	0.405879	0	0
GABA.CGE.VIP.CALB2	4	2.82741	2.20774	0.373169	0	0	0	0.164982	0	2.37113	0	0.00776853	0.517897	0.889937	0.0154772	0.0531534	0.00776853	0	1.20118	0	0	1.35525	0.0231268	5.71579	0.536311	1.12567	2.76703	0	2.57111	0	0	0.00776853	0	0
GABA.CGE.VIP.CALB2	4	2.61155	1.72061	0.485894	0	0	0.0395697	1.19209	0	1.7526	0	0	1.3677	0.404004	0.00670464	0	0	0	2.12501	0	0	1.44832	0	5.90807	3.80716	0	2.37344	0	0	0	0	0.843829	0	0
GABA.CGE.VIP.CALB2	4	3.08652	2.38815	0.218112	0	0	0	0.177298	0	2.46671	0	0	0	0	0	0	0.00496168	0	0	0.363053	0	0.907161	1.23178	5.78391	0	3.86464	3.1486	0	3.41596	0	0.00496168	0.599227	0	0
GABA.CGE.VIP.CALB2	4	3.77494	2.39547	0.771147	0	0	0.00683351	0.312505	0	1.28629	0	0	2.04067	0.459219	0.00342259	0.215105	0.00683351	0.137519	0.0370192	0.74545	0	1.02099	1.00355	6.24081	3.18594	2.15981	3.03574	0	3.28092	0	0	1.66628	0	0
GABA.CGE.VIP.CALB2	4	3.02076	1.92285	0.217457	0	0	0.0052668	0	0	1.92594	0	0	1.16708	0	0.010506	0	0	0	1.89626	0	0	1.46849	0	6.01248	2.17471	0	2.33002	0	0	0	0	0.806906	0	0
GABA.CGE.VIP.CALB2	4	2.86851	1.07934	0.583435	0	0	0.0490733	0.472232	0	1.95278	0	0	1.57851	0.951911	0	0	0	0	0.97114	0	0	0.145985	1.04897	5.77671	4.1418	1.92657	2.41291	0	0	0	0	1.16919	0	0
GABA.CGE.VIP.CALB2	4	2.63221	1.65355	0.260875	0	0	0.0058274	0.978256	0	2.22991	0	0	2.02793	0	0	0	0.503544	0	0	0.437851	0	0.0456952	0	5.93621	3.93889	0	2.28255	0	0.0058274	0	0	1.19827	0	0
GABA.CGE.VIP.CALB2	4	2.69271	2.39613	0.301873	0	0	0.0113033	0.740485	0	2.09733	0	0	1.47486	0.0056676	0.0056676	0	0	0	0.390304	0	0	0.995142	0	5.82598	0.0056676	0	2.94714	0	2.62711	0	0.236757	0.276333	0	0
GABA.CGE.VIP.CALB2	4	3.32292	2.42633	0.374068	0	0	0.039904	0.155857	0	2.81662	0	0	1.81691	0.953024	0	0	0.0172971	0	0.798105	0	0	1.35704	0.005799	5.80077	0.345662	2.03057	2.65706	0	2.63728	0	0.366034	0	0	0
GABA.CGE.VIP.CALB2	4	2.38703	1.10687	0.349634	0	0	0.0168258	1.01283	0	0.55767	0	0	2.27202	0.862368	0	0	0	0	0.518035	0.782883	0	0.511274	2.14735	5.63087	3.80045	2.19255	3.34232	0	0	0	0	0	0	0
GABA.CGE.VIP.CALB2	4	3.08138	1.48554	0.339518	0	0	0.0125543	0.102001	0	1.86527	0	0	2.11575	0	0.00629687	0.00629687	0	0	0.00629687	0.49347	0	1.42056	0.830703	5.56615	0	2.29384	2.83434	0	3.45669	0	0	0	0	0
GABA.CGE.VIP.CALB2	4	3.34788	2.52854	0.105316	0	0	0.0150312	0	0	1.1	0	0	0	0.364085	0.0100459	1.00671	0	0.0150312	1.49471	0.100762	0	1.18993	0.00503554	5.31199	0	3.17952	2.83694	0	3.3049	0	0	0.649055	0	0
GABA.CGE.VIP.CALB2	4	2.89132	1.82118	0.0432238	0	0	0.0484977	0	0	2.3341	0	0.0109824	1.16755	0.138961	0	0	0	0.738716	0.403416	1.31724	0	0.641852	2.24695	5.4612	0.3026	0	2.39934	0	2.11684	0	0	0.208558	0	0
GABA.CGE.VIP.CALB2	4	3.33103	2.49668	0.36281	0	0	0	0.193383	0	2.24473	0	0	0.979871	0	0	0	0.0106109	0	0.0867948	0.639779	0.00531952	1.62432	1.61799	5.48504	0.00531952	2.41383	2.63013	0	3.39797	0	0	0.434401	0	0
GABA.CGE.VIP.CALB2	4	3.62116	1.73618	0.828313	0	0	0	0.851702	0	1.41996	0	0	0	0	0	0	0	0	0	0.954846	0	1.40012	0	5.54532	0.923069	0.00540325	2.54649	0	3.45299	0	0	0	0	0
GABA.CGE.VIP.CALB2	4	3.57238	2.54001	0.763983	0	0	0	0.770838	0	1.22144	0	0	1.26544	0.0573847	0	0	0	0	0	0.00490986	0	0.212085	0	5.32128	0	0.00490986	2.6241	0	3.02022	0	0	0.623937	0.547223	0
GABA.CGE.VIP.CALB2	4	2.90192	1.92749	0.391015	0	0	0.00542256	0.605356	0	0.278238	0	0.0983134	2.06548	1.02758	0	0	0	0.525045	0.709554	0.587387	0	1.39341	2.24769	5.43138	3.34538	0.0108159	2.70812	0	0	0.286437	0	0	0	0
GABA.CGE.VIP.CALB2	4	3.67547	2.00773	0.68411	0	0	0.0105039	0.238434	0	1.00299	0	0	1.71017	0	0	0.169562	0.21316	0.295036	0.367062	0.0564519	0	0.991307	1.22598	6.07509	2.77782	0	1.77576	0	2.34564	0	0	1.08832	0	0
GABA.CGE.VIP.CALB2	4	3.25625	2.19899	0.52928	0	0	0.0153857	0.378417	0	2.2317	0	0	0.829448	0.16188	0	0	0	0	0	0.616674	0	1.3779	0	5.0845	1.50038	0.0153857	1.10893	0	0	0.00515491	0	0	0.170633	0
GABA.CGE.VIP.CALB2	4	2.73089	2.16943	0.700289	0	0	0.0125995	0.255898	0	0.966708	0	0	0.668311	0.832743	0	0	0	0.832743	0	0	0	1.16706	1.24303	5.86085	0	0.00631958	1.88482	0	0.00631958	0	0.455463	0	0	0
GABA.CGE.VIP.CALB2	4	3.5491	2.4745	0.0334048	0	0	0.0112594	0.0388653	0	1.88523	0	0	1.49496	0.746524	0	0.0970423	0	0.746524	0.53845	0	0	0.296655	0.71379	6.20091	2.49339	0.0334048	2.02159	0	3.05161	0	0	0.702637	0	0
GABA.CGE.VIP.CALB2	4	3.42325	2.88891	0.247295	0	0	0.00635604	0.550011	0	2.37544	0.00635604	0	2.7648	0	0	0	0	0.0558003	1.0908	0.0126719	0	0.211817	0.865955	6.07393	0	0	2.19818	0	1.20026	0	0.0189482	0.0313837	0	0
GABA.CGE.VIP.CALB2	4	3.74036	2.84073	0.356657	0	0	0.040003	0.451964	0	1.96986	0	0	2.10872	0.0721583	0	0	0.0135129	0.185707	1.1031	0	0	0.864605	1.14075	5.8059	2.34319	0.0135129	2.63462	0	2.03327	0	0	1.17914	0	0
GABA.CGE.VIP.CALB2	4	3.04637	3.19318	0.166857	0	0	0.0288672	0.868104	0	3.43275	0	0	1.22769	0.528893	0	0	0	0	1.08398	0.034542	0	0.0174201	0.576084	5.76038	0	0.0116471	1.01424	0	0	0	0.116012	0	0	0
GABA.CGE.VIP.CALB2	4	1.15812	0.927449	0.257005	0	0	0.0207162	0.549639	0	2.03007	0	0	0	0	0	0	0	0	0.705905	1.44727	0	1.28744	0.919135	5.58216	0	0.0207162	1.58073	0	0	0	0	0	0	0
GABA.CGE.VIP.CALB2	4	4.21212	2.40982	0.526433	0	0	0.0112947	0.390059	0	0.280449	0	0	1.89562	0	0	0.122771	0	0.0921683	0.485342	0	0	0.800541	1.63489	5.85708	2.87438	0.00566331	2.60229	0	2.56673	0	0	0.938501	0	0
GABA.CGE.VIP.CALB2	4	3.22157	2.62672	0.51712	0	0	0.00544635	0.0269399	0	2.48254	0	0	1.08169	0	0	0	0	0	0.930036	0.00544635	0	0.630876	0	5.39417	0.358678	0.0216097	1.93441	0	0.00544635	0	0	0	0.351018	0
GABA.CGE.VIP.CALB2	4	2.87709	2.62877	0.603039	0	0	0.00463902	0.197654	0	2.57181	0	0	1.0922	0.727285	0	0	0	0	0.577268	0	0	0.662306	0	5.66454	0.00463902	1.03605	2.87105	0	0.455255	0.00463902	0	0.302609	0.00463902	0
GABA.CGE.VIP.CALB2	4	3.89532	2.57404	0.569335	0	0.00343397	0.0136657	0.727452	0	2.07515	0	0	2.17572	0.651516	0	0	0.00685619	0	0.282761	0	0	0.769755	0	5.77533	0.313398	0.0170531	1.56597	0	0.714068	0	0	0.539701	0	0
GABA.CGE.VIP.CALB2	4	2.95756	2.35641	0.0778473	0	0	0.0200373	0.357735	0	1.80502	0	0	0	0	0	0	0.00504709	0	1.27268	0.792678	0	1.22923	1.55801	5.85839	2.13454	2.13334	2.94353	0	0	0	0	0.752965	0	0
GABA.CGE.VIP.CALB2	4	2.94814	2.21999	0.262413	0	0	0	0.45961	0	1.43657	0	0.320529	0.786043	0.139789	0.0110521	0	0	0.431134	0	0.134946	0	1.43524	0	5.55922	0.880211	0	1.15982	0	0.00554134	0	0	0	0	0
GABA.CGE.VIP.CALB2	4	3.91416	3.06533	1.0526	0	0	0	0	0	0.103573	0	0.00494806	2.00933	1.0316	0.00494806	0	0	0	1.10816	0	0	0.661399	0	4.92112	0	1.93192	3.01065	0	2.02974	0	0	0.435435	0.00494806	0
GABA.CGE.VIP.CALB2	4	3.03431	2.66735	0.245588	0	0	0.00879843	0.545027	0	2.63111	0	0.00879843	1.98376	0	0.00440889	0	0	0	0.478832	0.00879843	0	0.17766	0.64259	5.70269	1.38966	0	2.36143	0	0.286229	0	0.3567	0.00440889	0	0
GABA.CGE.VIP.CALB2	4	2.60143	2.39966	0.168481	0	0	0	0.35533	0	1.49392	0	0	1.30394	0.00457716	0.0136691	0	0	0	0	0.342384	0	1.00077	0	5.47835	0	1.54901	1.81078	0	2.68901	0	0.49608	0.217645	0	0
GABA.CGE.VIP.CALB2	4	2.45563	1.67261	0.265031	0	0	0.012831	0.104149	0	1.79565	0	0.0191853	1.57729	0.0191853	0	0	0	0	0.00643607	0	0	1.06413	0.623376	5.86218	0.670702	0	2.21006	0	2.68574	0	0	0.322774	0.00643607	0
GABA.CGE.VIP.CALB2	4	3.12751	0.980627	0.621376	0	0	0	0.930168	0	0.164916	0	0.0043635	2.28758	1.13392	0.0043635	0	0	0.595195	0	0	0	0.290222	2.3984	5.49696	1.18467	0.0043635	3.01118	0	0.0043635	0	0	0.687283	0	0
GABA.CGE.VIP.CALB2	4	2.93347	1.88274	0.401421	0	0.00529719	0.0105665	0.161499	0	2.17982	0	0.00529719	1.70739	0.00529719	0.00529719	0	0	0	1.11519	0	0	0.932267	0.00529719	5.82685	2.06543	0	2.1864	0	0	0	0	0	0	0
GABA.CGE.VIP.CALB2	4	2.98948	1.17269	0.735649	0	0	0.00710152	0.610288	0	1.26231	0	0	2.01533	0.0106335	0	0	0	0	0	0.940307	0.00355706	0.779088	0.825413	5.21221	3.36142	0.00355706	0.936124	0	0.00355706	0	0.328159	1.1148	0	0
GABA.CGE.VIP.CALB2	4	2.71148	2.20361	0.147844	0	0	0.00755857	0.474355	0	0.0150604	0	1.20503	1.6227	0.0150604	0	0.0150604	0	0.967459	0.497688	0.0445175	0	1.04777	1.73317	5.36301	0.564587	0.00755857	2.50133	0	0.00755857	0	0	0.369938	0.00755857	0
GABA.CGE.VIP.CALB2	4	3.84083	2.39687	0.414196	0	0	0	0.450465	0	0.691057	0	0.0101102	1.28973	0.472879	0.00506787	0.0151272	0	0.0151272	0	0.0151272	0	0.685952	1.21118	5.64563	1.63721	0.00506787	1.39077	0	3.03053	0	0	0.0543822	0	0
GABA.CGE.VIP.CALB2	4	2.89089	1.50022	0.650497	0	0	0	0.705474	0	0.88915	0	0.545147	2.11206	0.00829724	0.00415722	0.0327837	0	0	0	0.0368071	0	1.39548	0	5.62932	2.1201	0.00415722	1.37568	0	0.00415722	0	0	0.154124	0	0
GABA.CGE.VIP.CALB2	4	2.98718	2.23771	0.0610939	0	0	0	0.417387	0	2.45743	0	0.00697547	2.27293	0	0	0	0	0	0	0	0	1.37117	0	5.1394	2.10277	0	0.289675	0	0	0	0	0	0	0
GABA.CGE.VIP.CALB2	4	2.95743	1.92883	0.238332	0	0	0	0.717969	0	1.93074	0	0	0.278876	0.217426	0	0	0	0.0130429	0.849761	0	0	0.821297	1.81157	5.539	0.00654271	2.08076	1.80727	0	3.24704	0	0	0.212131	0	0
GABA.CGE.VIP.CALB2	4	3.63422	2.28035	0.703622	0	0	0	0.824268	0	0.470774	0	0.0356386	1.90153	0.153457	0.0154295	0	0	0	0	0.396899	0	1.61487	0.758507	5.34102	0.461016	0	1.72507	0	0	0	0	0	0	0
GABA.CGE.VIP.CALB2	4	2.81698	1.73305	0.460064	0	0	0.0102863	0.297412	0	1.96449	0	0.53849	0.346122	0.15309	0.0102863	0.0454773	0	0.673742	0	0.809105	0	1.49017	0.766789	5.38513	0	0	2.08714	0	0.907666	0	0	0.367828	0	0
GABA.CGE.VIP.CALB2	4	2.48611	2.47246	0.376355	0	0	0	0.0411608	0	3.29193	0	0	1.58439	0	0	0	0	0	0.748355	1.42851	0	1.8455	1.35946	5.50523	0.324566	0.0104501	1.86927	0	0	0.00523871	0	0.662786	0	0
GABA.CGE.VIP.CALB2	4	3.30109	2.53479	0.321076	0	0	0.0135919	0.382046	0	0.842796	0	0	1.29104	0	0	0	0	0	0	0.294248	0	1.80676	0.892594	5.82021	0	0.0270015	1.58273	0	1.85999	0	0	0	0	0
GABA.CGE.VIP.CALB2	4	2.15943	0.743391	0.883029	0	0	0	0.790946	0	1.65761	0	0.00784809	1.61309	0.00784809	0	0	0	0	0.758266	0.567731	0	1.31537	0.00784809	5.78907	3.38833	0.0156351	1.3848	0	0	0.00784809	0	0.826047	0	0
GABA.CGE.VIP.CALB2	4	3.46868	2.43325	0.542045	0	0	0	0.467165	0	2.00332	0	0	1.61207	0.494016	0	0.251013	0	0	0	0	0	1.08521	1.43965	5.73534	0.974535	2.31125	2.53412	0	3.22475	0	0	0.828628	0	0
GABA.CGE.VIP.CALB2	4	2.72722	1.36497	0.235512	0	0	0	0.257135	0	1.24979	0	0	1.42794	0	0	0	0	0	0	0	0	0.639881	0.6658	5.15126	3.22855	0.0218884	0.478778	0	0	0	0	0	0	0
GABA.CGE.VIP.CALB2	4	3.2944	2.52398	0.768788	0	0	0.00620197	0.0366476	0	0.517671	0	0	1.47235	0	0	0.706313	0.0184917	0.693957	0.99035	0.00620197	0	1.4166	1.69528	5.87696	2.32373	1.47662	1.84457	0	2.89156	0	0	1.05954	0	0
GABA.CGE.VIP.CALB2	4	3.40511	2.6439	0.380266	0	0	0.0102291	0.524059	0	2.7158	0	0	2.29707	0.276669	0	0	0.0102291	0.511808	0.780419	0	0	0.554044	1.15679	5.73788	1.42713	0.0598617	1.93325	0	2.49694	0	0	0.900158	0	0
GABA.CGE.VIP.CALB2	4	2.63987	1.60917	0.467914	0	0	0	0.761264	0	1.88393	0	0	0.775825	0.86783	0	0	0	0	1.07007	0	0	0.579462	0	5.57067	3.06542	0.0104133	1.83669	0	0.736514	0	0	1.37948	0	0
GABA.CGE.VIP.CALB2	4	3.77393	2.01174	0.329647	0	0	0	0.24601	0	0.288703	0	0	0.592689	0.24601	0	0.803253	0.00556275	0	1.80254	0.672668	0	1.08639	1.27144	4.95548	0	3.33792	2.35453	0	1.26359	0	0	0.722642	0	0
GABA.CGE.VIP.CALB2	4	3.73544	2.40249	0.505454	0	0	0.00575305	0.257932	0	1.74389	0	0	1.07202	0.595268	0	0.119499	0	0.35149	0	0	0	1.30994	0.847062	5.22427	0.00575305	0.0988071	2.67421	0	3.26384	0.00575305	0	1.16079	0	0
GABA.CGE.VIP.CALB2	4	3.81086	1.45646	0.836833	0	0	0	0.612936	0.507156	1.90141	0	0	1.32417	0	0	0	0.00401973	0	0.110474	0.163159	0	1.24039	2.19625	5.63368	2.05554	0	2.16346	0	3.47868	0	0	1.33058	0.0472021	0
GABA.CGE.VIP.CALB2	4	3.95952	2.62235	0.857029	0	0	0	0.0712076	0	0.184786	0	0	1.33377	0	0	0.455267	0.00460215	0.0137434	1.03746	0.0538754	0	1.08221	1.81835	5.77826	3.06436	0	2.94438	0	3.33445	0	0	1.72422	0	0
GABA.CGE.VIP.CALB2	4	2.93657	1.49487	0.486821	0	0	0	0.289485	0	2.60585	0	0	0	0	0	0	0	0	0.0125898	0.525014	0	0.667934	1.03154	5.62389	0	0.0250231	2.03572	0	2.77144	0	0	0.904076	0	0
GABA.CGE.VIP.CALB2	4	3.8122	1.1628	0.532619	0	0	0.018832	0.58692	0	1.6718	0	0	0.558327	0	0	0	0.00631683	0	0.463309	0.113685	0	1.14884	1.60279	5.848	0	0.012594	2.38451	0	2.75537	0	0	0.611285	0	0
GABA.CGE.VIP.CALB2	4	3.27058	0.993457	0.638194	0	0	0	0.54964	0	0.274226	0	0.638194	1.76008	0.202615	0	0.306229	0	0.482628	0	0.583027	0	0.957162	1.18889	4.94398	3.05618	0.00533341	1.43967	0	0	0	0	0.290355	0	0
GABA.CGE.VIP.CALB2	4	3.59747	2.73059	0.796235	0	0	0.00939125	0.263852	0	2.56872	0	0	3.18838	0.00470665	0.00470665	0.00470665	0	0	0.454614	0.475357	0	0.594129	0	5.96517	0.0460984	0.674178	2.32235	0	1.96738	0	0	1.13576	0.09875	0
GABA.CGE.VIP.CALB2	4	2.99094	2.16099	0.588999	0	0	0	0.106223	0	0.272022	0	0	0	0	0	0.0347786	0	0.182776	1.7365	1.20647	0	0.87706	1.6973	5.60676	1.52819	4.30117	3.45319	0.345636	0.496479	0	0	0.859734	0	0
GABA.CGE.VIP.CALB2	4	3.84499	2.72896	0.565798	0	0	0.026438	0.21601	0	2.14212	0	0	1.19675	0	0	0	0.00534381	0.653156	0	0.00534381	0	0.422057	1.80404	5.74614	0	3.15695	2.54261	0	3.34908	0	0.80546	0.717933	0	0
GABA.CGE.VIP.CALB2	4	3.46444	2.28189	0.288446	0	0	0.0497448	0.755055	0	0.0657913	0	0	0	0.65131	0	0.430719	0	0	1.35261	0.0497448	0	1.71798	0	2.14508	0	2.44095	2.75727	0	3.78614	0	0	0.508645	0	0
GABA.CGE.VIP.CALB2	4	2.866	0.796347	0.666232	0	0	0.0235906	0.645585	0	0.83506	0	0	2.147	0	0	0	0	0	0	1.44327	0	1.35081	0.490164	5.64824	3.66057	0	0.917841	0	0	0.072871	0	0.836785	0	0
GABA.CGE.VIP.CALB2	4	2.67943	1.80033	0.152796	0	0	0.0196167	0	0	2.6528	0	0.0131205	1.72676	0	0	0	0.0131205	0.00658176	0	0	0	1.10548	0	5.43204	0	0.00658176	1.8101	0	0.466443	0	0	0.347849	0	0
GABA.CGE.VIP.CALB2	4	3.07052	1.16332	0.602068	0	0	0.0219294	0.095103	0	0.646598	0	0	1.58629	0	0	0	0	0	0	0	0	1.61976	0	5.47147	2.84598	0.00552759	1.29914	0	0	0	0	0.901512	0.583686	0
GABA.CGE.VIP.CALB2	4	3.82366	1.82505	0.29751	0	0	0	0.516552	0	1.12461	0	0	2.14924	0	0	0	0	0.904153	1.43962	0.0166272	0	0.425875	1.02947	5.97741	2.93772	3.61401	2.58108	0	3.10403	0.00557318	0	1.04137	0	0
GABA.CGE.VIP.CALB2	4	2.57299	2.13678	0.147447	0	0	0.0101976	0.842525	0	2.78662	0	0	3.33961	0	0	0	0.826956	0	0.347212	0.264185	0	1.17544	0	5.63273	3.45383	0.00511181	0.896229	0	0	0	0	0	0.040181	0
GABA.CGE.VIP.CALB2	4	3.02232	0.597794	0.504067	0	0	0.0142507	0.210607	0	1.73593	0	0	2.40948	0	0	0	0	0	0.538159	0.0142507	0	1.0727	0	5.53066	3.38568	0.00952298	1.1253	0	0	0	0	0.0142507	0	0
GABA.CGE.VIP.CALB2	4	2.82848	2.472	0.252365	0	0	0.0185486	0	0	2.04072	0	0	1.3106	0	0	0	0	0	0.86149	0.0124039	0	0.171612	0	5.56335	0	2.9291	1.43691	0	3.35609	0	0	1.28848	0	0
GABA.CGE.VIP.CALB2	4	3.49863	1.95417	0.148135	0	0	0.00468515	0.291267	0.00468515	1.79901	0	0.00468515	1.68906	0.711894	0	0.375367	0.00468515	0	0.218492	0	0.00468515	0.734678	1.65105	5.85542	3.419	1.86442	1.85932	0	2.83706	0	0.403992	1.4848	0	0
GABA.CGE.VIP.CALB2	4	3.76979	2.20254	0.728873	0	0	0	0.532882	0	1.34284	0	0	2.00835	0	0	0.424673	0	0	0.638239	0.0520178	0	0.680904	1.55962	5.98185	3.0326	2.1923	1.93889	0	3.18142	0	0	1.539	0	0
GABA.CGE.VIP.CALB2	4	2.57115	1.46026	0.739229	0	0	0.023818	0.38035	0	2.04008	0	0	1.86369	0	0	0	0.00480921	0	0.160032	0.759734	0	1.82326	1.76144	5.58188	4.13314	0	1.45689	0	0	0	0	0.20815	0	0
GABA.CGE.VIP.CALB2	4	3.00255	1.48937	0.14871	0	0.0051588	0.030561	0.565486	0	0.0153972	0	0	0.644546	0	0	0	0	0	0	0.230005	0	0.153157	1.19909	5.6519	0	0.0102911	1.90591	0	1.3991	0	0	0	0	0
GABA.CGE.VIP.CALB2	4	2.30529	1.94712	0.08235	0	0	0	0.170567	0	0.972741	0	0	2.46271	0.00712752	0	1.22478	0	0	0	0.200278	0	1.77734	0	4.68947	2.74447	0	1.07788	0	0	0.268177	0	0	0	0
GABA.CGE.VIP.CALB2	4	2.45724	2.04964	0.252111	0	0	0.0240094	1.03762	0	2.25233	0	0	0.536235	0.197784	0	0.555939	0.00484821	0	1.0748	0	0	1.16364	1.48095	6.04464	2.99001	0	2.48394	0	0	0	0	0.729506	0	0
GABA.CGE.VIP.CALB2	4	2.71965	1.29156	0.596614	0	0	0	0.474682	0	1.17171	0	0	1.93099	0	0	0	0	0	0.421417	1.13219	0	1.30619	1.0206	6.12474	2.74484	3.50212	3.27906	0	1.22908	0.00593824	0	0.00593824	0	0
GABA.CGE.VIP.CALB2	4	3.20237	2.96218	0.377604	0	0	0	0.63618	0	2.73974	0	0	1.31338	0	0	0	0	0.52867	0	0	0	0.702861	0.683034	5.76647	0.5016	0	1.45118	0	0	0	0	1.06187	0	0
GABA.CGE.VIP.CALB2	4	2.9939	2.4588	0.318864	0	0	0	0.681832	0	0.892212	0	0	0.257158	0.0932624	0	0	0	0.00513153	0	0.0353798	0	0.655471	0.411664	5.6867	0	0.00513153	2.62654	0	0.917194	0.00513153	0.333714	0	0	0
GABA.CGE.VIP.CALB2	4	2.75247	1.15236	0.449609	0	0	0	0.317151	0	0.476079	0	0.173309	3.18817	0.492274	0	0.18211	0.0052427	0.818373	0	0.0156464	0	0.601726	2.00888	5.69231	3.80132	0.0052427	1.89788	0	0	0	0	0	0	0
GABA.CGE.VIP.CALB2	4	3.7078	2.11265	0.428839	0	0	0	0.0153283	0	0.249344	0	0	1.15785	1.58137	0	0	0	0.42211	0	0.0647893	0	0.500016	0.292535	5.15964	1.53586	0	2.47956	0	2.61152	0	0	1.18655	0	0
GABA.CGE.VIP.CALB2	4	3.35229	1.66489	0.219702	0	0	0	0.35938	0	1.27671	0	0	0.499964	0	0	0	0	0	2.03004	1.48841	0	0.0847583	1.22032	5.67329	1.39791	0.00978023	2.92645	0	3.33634	0	0	1.0937	0	0
GABA.CGE.VIP.CALB2	4	2.71193	0.122762	0.24293	0	0	0.00685096	0.531333	0	1.78909	0	0	1.23959	0	0	0	0	0	0	0	0	1.02015	0	6.01851	0.473096	0	0.71536	0	0	0	0	0.040419	0	0
GABA.CGE.VIP.CALB2	4	2.74845	1.73189	0.375204	0	0	0	1.13076	0	2.57886	0	0.01223	1.54838	0	0	0.00613369	0	0	0.00613369	0.50951	0	0.718856	1.7598	5.71204	4.10703	0.00613369	0.964803	0	0	0.00613369	0	0	0	0
GABA.CGE.VIP.CALB2	4	3.28427	1.41923	0.128159	0	0	0.0162749	0.457268	0	1.58693	0	0	0	0	0	0	0.0162749	0	1.59916	0.60505	0	0.784961	0.960676	6.03016	1.36765	0.693594	3.11716	0	0.0938988	0	0	0.324151	0	0
GABA.CGE.VIP.CALB2	4	2.49308	0.0510272	0.128765	0	0	0.00652261	0	0	1.05713	0	0	1.58927	0	0	0.601325	0	0	0.00652261	0	0	1.07068	1.724	5.70885	3.19463	0	1.32483	0	0.00652261	0	0	0.0385124	0	0
GABA.CGE.VIP.CALB2	4	2.78382	1.53236	0.498096	0	0	0.00624826	1.10051	0	1.59913	0	0	2.14111	0	0.00624826	0.00624826	0	0	0.585569	0.00624826	0	1.39622	1.23858	5.7438	3.67097	0	1.7688	0	0	0	0	0	0	0
GABA.CGE.VIP.CALB2	4	2.48474	0.827582	0.696828	0	0	0	0.531222	0	1.39439	0	0	2.41531	0	0	0	0.00517922	0.00517922	0.00517922	0.271217	0	0.441871	0	5.73686	3.45972	0	1.30134	0	0	0	0	0	0	0
GABA.CGE.VIP.CALB2	4	3.12444	1.68298	0.593692	0	0	0.00667733	0.00667733	0	2.00304	0	0	1.51972	1.19534	0	0.0394111	0	0	0	0.651208	0	0.619263	0	5.28947	0.199743	0.318586	1.99031	0	2.50104	0	0	0	0	0
GABA.CGE.VIP.CALB2	4	3.06081	2.24167	0.277337	0	0	0	0.353688	0	2.01523	0	0	1.82575	0	0	0	0.0054954	0	0.0109608	0	0	0.735044	0.391648	5.53028	0.0054954	0	1.41426	0	0.47727	0	0.234681	0	0	0
GABA.CGE.VIP.CALB2	4	2.99699	1.64315	0.133104	0	0	0.00473441	0.161769	0	0.784428	0	0	2.43881	0	0	0	0.00473441	0	0	0.650191	0	1.43134	0	5.64715	2.55074	0.00473441	0.953406	0	0.00473441	0	0	0	0	0
GABA.CGE.VIP.CALB2	4	3.4325	1.47093	0.0463873	0	0	0	0.32626	0	1.55333	0	0	2.16032	0	0	0	0.00591746	0	0.473354	0.236711	0	1.0887	0.00591746	5.26265	0	0	0.912156	0	0.32626	0	0	1.03325	0	0
GABA.CGE.VIP.CALB2	4	3.12227	1.54589	0.433704	0	0	0	0.135221	0	1.77969	0	0.0889986	2.06072	0.148681	0	0	0	0	0	0.353489	0	0.305131	0	5.18071	2.65845	0	1.33163	0	0	0	0.403077	0	0	0
GABA.CGE.VIP.CALB2	4	2.4961	2.31232	0.206781	0	0	0	0.691865	0	3.08196	0	0	2.61302	0.211684	0	0	0	0.140741	0	0.151189	0	0.845832	0	5.92688	0	0	1.61463	0	0	0	0.0700305	0	0	0
GABA.CGE.VIP.CALB2	4	3.4679	2.32922	0.263673	0	0	0.0058983	0.647639	0	2.18044	0	0.0058983	2.25014	0	0	0.011762	0.0058983	0	0.532962	0.0058983	0	1.28992	1.4095	6.15959	0.764375	0	2.28506	0	1.68225	0	0	0.600092	0	0
GABA.CGE.VIP.CALB2	4	2.64541	1.24136	0.165534	0	0	0	0.0930461	0	1.01622	0	0	1.1648	0	0	0	0	0	0.407173	0	0	1.94172	0.695707	5.78236	0	0.00747295	2.42801	0	2.24321	0	0	0	0	0
GABA.CGE.VIP.CALB2	4	2.72985	0.622512	0.356663	0	0	0.0129029	0.712421	0	1.5588	0	0	2.11997	0	0.314895	0.133527	0	0	0	0.144826	0	1.26929	0.161539	5.9448	2.41018	0	1.63505	0	0	0	0	0.601384	0	0
GABA.CGE.VIP.CALB2	4	2.19843	0.407947	0.603612	0	0	0	0.367519	0	1.63458	0	0	1.20106	0	0	0	0	0	1.47454	1.49661	0	0.883397	0	5.7519	3.07263	3.34969	2.9574	0	0	0	0	0	0	0
GABA.CGE.VIP.CALB2	4	3.30017	1.20161	0.318175	0	0.00704339	0.0140375	0.434542	0	0.0550051	0	0	0.872316	0	0	0	0.00704339	0	0.144534	0.434542	0	1.23093	1.03802	6.31572	0	3.63055	3.03487	0	4.06879	0	0.434542	0	0	0
GABA.CGE.VIP.CALB2	4	2.41805	1.404	0.285478	0	0	0.0121627	0.521925	0	2.33689	0	0	1.46662	0.00609983	0	0	0.00609983	0	0.00609983	0	0	0.839613	0.0121627	5.34185	1.69415	0	0.820943	0	0.00609983	0	0	0	0	0
GABA.CGE.VIP.CALB2	4	3.17104	1.52093	0.341779	0	0	0	0.325565	0	0.841755	0	0	1.67778	0	0	0	0	0	0.00751702	0.14055	0.00751702	1.71649	0	6.12234	0	2.55481	2.78292	0	3.59485	0	0	0	0	0
GABA.CGE.VIP.CALB2	4	3.43533	1.70985	0.142971	0	0	0	0.0849576	0	0.371057	0	0.168268	1.4569	0.111745	0	0	0	0.426591	0.00589399	0.430442	0	1.11749	2.31872	5.45134	0	0	1.49341	0	0	0	0	0.0685337	0	0
GABA.CGE.VIP.CALB2	4	2.88989	1.29147	0.164544	0	0	0	0.201772	0	2.68258	0	0.300296	2.47802	0.145397	0	0	0	0	0	1.03616	0	1.45023	0	5.34526	3.42902	0	1.82001	0	0.00742469	0	0	0	0	0
GABA.CGE.VIP.CALB2	4	3.91926	1.5947	0.458289	0	0	0	0.431188	0	1.67308	0	0	2.03315	0	0	0	0	0	0	0.568913	0	1.44576	0.797898	5.8816	2.25225	0.00527123	2.07649	0	3.0086	0	0	1.07649	0.454941	0
GABA.CGE.VIP.CALB2	4	3.12143	1.84392	0.268794	0	0	0.0130374	0.308129	0	2.23706	0	0	1.2713	0.278773	0	0	0	0.547146	0.846709	0	0	1.25647	0.955887	5.92963	0.00653995	0.217344	2.07463	0	2.49823	0	0	0.0998292	0	0
GABA.CGE.VIP.CALB2	4	3.96466	2.25662	0.538461	0	0	0	0	0	0.00484111	0	0	0	0	0	0.452753	0.622621	1.23998	2.04271	0.558094	0	0.79882	0	3.94504	0	3.30857	3.32302	0	1.38848	0.00484111	0	0.529928	0	0
GABA.CGE.VIP.CALB2	4	2.72108	1.32157	0.0988294	0	0	0.0205627	0.538419	0	1.0898	0	0	1.70122	0	0	0	0	0	0	1.14198	0	1.55303	1.45293	6.15402	0	2.71605	2.36004	0	2.23334	0	0	0.833751	0	0
GABA.CGE.VIP.CALB2	4	3.37945	2.10094	0.616266	0	0	0	0.200096	0	2.08694	0	0	1.60463	0.00566393	0	0	0.00566393	0	0.167005	0.00566393	0	0.977784	0.122784	6.17195	1.83866	0	2.45384	0	0	0	0	0.798047	0	0
GABA.CGE.VIP.CALB2	4	3.06097	0.204275	0.267172	0	0	0	0.0419833	0	2.27191	0	0	1.25949	0	0	0	0	0	0.648499	1.16665	0	1.18742	0.0301668	5.05472	0	0.00610661	2.12084	0	2.78444	0	0	1.7162	0	0
GABA.CGE.VIP.CALB2	4	3.17834	2.44726	0.972432	0	0	0.00709325	0.468723	0	2.56014	0	0	1.99659	0.776821	0	0	0	0	0.00709325	0	0	0.0349736	0.277883	5.48795	1.28439	0	2.27347	0	2.72466	0.00709325	0	0.723023	0	0
GABA.CGE.VIP.CALB2	4	3.01302	1.98208	0.161566	0	0	0	0	0	3.25487	0	0	1.78768	0	0	0.00546472	0.00546472	0	0.635364	0	0	0.614835	0	5.70392	0	0	1.86783	0	0.426267	0	0.0840423	0.729488	0	0
GABA.CGE.VIP.CALB2	4	2.47439	1.88785	0.44576	0	0	0.0115144	0.285222	0	2.70891	0	0	1.15964	0	0	0	0	0	1.54388	0	0	1.30945	1.09785	5.81977	0.00577378	0	2.04567	0	0	0	0	0.236148	0	0
GABA.CGE.VIP.CALB2	4	2.42397	2.8308	0.465864	0	0.00777744	0.0154949	0.204103	0	3.57443	0	0	0.78243	0.50902	0	0	0	0	1.33988	0.0154949	0	0.712181	0.00777744	4.62023	2.26463	0	2.19146	0	0	0	0	1.21133	0	0
GABA.CGE.VIP.CALB2	4	2.24732	1.28955	0.321549	0	0	0	0.837947	0	1.03578	0	0.286573	2.09616	0	0	0	1.06616	1.18649	0	0.0311161	0	1.75172	0.0156791	5.17576	3.41291	0	2.50112	0	0	0	0	0	0	0
GABA.CGE.VIP.CALB2	4	2.19883	0.666157	0.458164	0	0	0.00933002	0.421946	0	2.42826	0	0	1.23464	0	0	0	0	0	0	0.521337	0	1.75936	0	4.59362	3.09686	0	1.75125	0	0	0	0	0	1.10371	0
GABA.CGE.VIP.CALB2	4	2.83161	2.65576	0.484361	0	0	0.00785688	0.577116	0	3.34369	0	0	0.747722	0	0	0	0	0	1.66302	0.297928	0	1.74205	0	5.31518	2.50279	0	2.29705	0	0	0	0.32108	1.09187	0	0
GABA.CGE.VIP.CALB2	4	2.48979	3.36739	0.289561	0	0	0.0237055	0.532783	0	2.54211	0	0	1.95574	0	0	0	0	0	0.83438	0.062007	0	1.07401	0	5.13227	0.00796443	0	1.29821	0	0	0	0	1.10626	0	0
GABA.CGE.VIP.CALB2	4	2.54145	2.09449	0.603362	0	0	0	1.44969	0	0.983421	0	0	1.76935	1.45966	0.00850246	0	0	1.2261	1.74877	0.00850246	0	1.62393	1.74281	5.26358	2.51556	3.13494	3.24059	0	0	0	0	0	0	0
GABA.CGE.VIP.CALB2	4	3.1503	2.02835	1.00653	0	0	0.0216476	0.278358	0	1.36739	0	0.00726805	1.57929	0	0	0.155099	0	0	0	0	0	0.422129	0.504711	5.51967	1.32371	3.70955	3.51211	0	2.60128	0	0	0.851088	0	0
GABA.CGE.VIP.CALB2	4	2.44036	2.17876	0.210609	0	0	0	0	0	1.0308	0	0	0.225112	0	0	0	0	0.0354309	1.78794	0	0	2.08691	0	3.72401	0	2.91734	2.70038	0	3.229	1.12876	0	0	0.203278	0
GABA.CGE.VIP.CALB2	4	2.8471	2.12949	0.431555	0	0	0.037822	0.595696	0	2.55095	0	0	1.26255	0	0	0	0	0	1.42107	0.078729	0	0.649967	1.2987	5.71034	1.11125	0	1.84591	0	0	0	0	0	0	0
GABA.CGE.VIP.CALB2	4	2.93423	1.80574	0.374298	0	0	0.0551947	0.456673	0	2.22534	0	0	1.55834	0	0	0	0	0	0.817771	0	0	1.00873	0	5.87961	0	0.0056586	2.05608	0	0	0	0	0	0	0
GABA.CGE.VIP.CALB2	4	3.50037	1.58685	0.282842	0	0	0	0	0	0.968686	0	0	0.573365	0	0	0.0282716	0	0	1.77067	0.566879	0	1.04414	1.90562	5.48272	0	3.92682	3.45122	0	1.5607	0	0	0.706344	0	0
GABA.CGE.VIP.CALB2	4	3.55375	1.70641	0.0892306	0	0	0.0115991	0.242291	0	2.27606	0	0	1.88883	0	0	0	0	0.717836	0.756901	0.584073	0	0.870592	1.87908	5.9342	1.84832	0.219134	2.48017	0	1.94376	0	0.278261	1.17557	0.495709	0
GABA.CGE.VIP.CALB2	4	2.48266	1.42667	0.383179	0	0	0	0.749277	0	1.55372	0	0	1.33884	0	0	0	0	0	1.63026	0.0567277	0	1.29007	1.16269	6.01592	3.32354	1.5914	1.75659	0	0	0	0	0.0128872	0	0
GABA.CGE.VIP.CALB2	4	2.86125	1.29552	0.0513229	0	0	0.0323841	0.851389	0	1.9567	0	0	0.732168	0	0	0.533192	0	0	1.02387	0	0	1.40143	2.19629	6.04521	1.99055	0	1.44737	0	0	0	0	0.318615	0	0
GABA.CGE.VIP.CALB2	4	3.22691	2.78886	0.408598	0	0	0	0.620024	0	2.38966	0	0	3.22691	0	0	0	0	0	0	0.0334064	0	0.165141	0.424596	5.3372	2.6419	0	1.05375	0	0	0	0	0	0.480155	0
GABA.CGE.VIP.CALB2	4	3.40447	2.00034	0.472929	0	0	0.0112392	0.337358	0	0.563763	0	0	0.866644	0	0	0	0.00563538	0.592295	1.24241	0.664627	0	0.873745	0	6.15632	2.05899	0.0168117	2.67616	0	3.98685	0	0.524407	0	0	0
GABA.CGE.VIP.CALB2	4	2.99714	1.47624	0.288984	0	0	0.012805	0	0	1.62254	0	0	2.54224	0	0	0.0254481	0.00642298	0	0	0	0	1.19013	0	5.28753	1.73775	0.00642298	1.39819	0	0	0	0	0	0	0
GABA.CGE.VIP.CALB2	4	3.56931	2.01281	0.566938	0	0	0.00543422	0.245218	0	1.35929	0	0	1.66138	0	0	0	0	0	0.922203	0.882421	0	1.16188	0	5.75155	2.4873	0.0268805	2.10391	0	2.63095	0	0	0.17912	0	0
GABA.CGE.VIP.CALB2	4	3.43081	2.8865	0.267148	0	0	0.0162723	0.184264	0	1.75241	0	0	1.73713	0	0	0	0	0	0	0	0	0.774843	0	5.64122	0.61093	0.355252	2.44799	0	2.21652	0	0	0.682518	0	0
GABA.CGE.VIP.CALB2	4	2.84592	1.00906	0.099846	0	0.0052363	0.0052363	0.0052363	0	1.69019	0	0	2.59882	0.164243	0	0	0.0052363	0	0	0.765355	0	0.127954	0	5.69931	0.789483	0.0052363	2.06402	0	0.241378	0	0	0	0	0
GABA.CGE.VIP.CALB2	4	3.10388	2.42212	0.272756	0	0	0.0166594	0.694315	0	2.96731	0	0	2.53033	0.671688	0	0	0	0	0.00558403	0	0	1.13676	0	6.10611	3.13846	0	1.72229	0	0	0.011137	0	0.255558	0	0
GABA.CGE.VIP.CALB2	4	3.33091	2.3781	0.782494	0	0	0.0254753	0.54076	0	2.69388	0	0	2.85202	0.261834	0	0	0	0	0	0.187658	0	0.391994	0.798877	5.92013	2.78837	0.0102681	1.59894	0	0	0	0	0.610398	0	0
GABA.CGE.VIP.CALB2	4	3.0196	2.12916	0.218195	0	0	0.0619038	0.397203	0	2.47383	0	0	1.75001	0	0	0	0.00578867	0.00578867	0	0	0	1.37351	0.521792	6.28546	2.5141	0.00578867	2.47481	0	0	0	0	0.93839	0	0
GABA.CGE.VIP.CALB2	4	3.66733	2.56593	0.684604	0	0	0.0137499	0.501205	0	2.34187	0	0	2.11413	0	0.00460434	0	0	0	0.914387	0	0	1.39884	0	5.95969	1.05559	0	1.25708	0	0.509557	0	0	0.0228126	0	0
GABA.CGE.VIP.CALB2	4	3.64909	2.64288	0.408179	0	0	0.0281331	0.535651	0	1.56157	0	0	1.82953	0	0.00474416	0	0	0	0	0.0554964	0	0.765847	0	5.88154	0.00946592	1.27199	2.07944	0	0.469494	0.112333	0	0	0	0
GABA.CGE.VIP.CALB2	4	3.23582	2.15985	0.257499	0	0	0.0223402	0.849532	0	1.95687	0	0	0.908158	0	0	0.00563201	0	0	1.96482	0	0	1.178	1.25977	6.46371	3.17704	2.21436	2.44769	0	0	0	0	1.46217	0	0
GABA.CGE.VIP.CALB2	4	4.59195	2.56836	0.294154	0	0	0.0159037	0.337022	0	0	0	0	1.91739	0.171451	0	0	0	0.120665	0.772376	0	0	0.72693	0.713931	5.85788	3.68453	0	2.04687	0	2.78021	0	0	1.05067	0	0
GABA.CGE.VIP.CALB2	4	2.82056	1.48289	0.274309	0	0	0.0201581	0	0	1.75443	0	0	2.22649	0	0.0101299	0	0	0	0.00507776	0.825424	0	1.35223	0	5.37273	2.86736	0	0.338016	0	0	0	0	0.193763	0.00507776	0
GABA.CGE.VIP.CALB2	4	3.34374	2.0368	0.494213	0	0	0.015986	0	0	0.015986	0	0.22511	1.67526	1.95887	0	0.605726	0	1.14011	0	0.874047	0	0.894018	0.149407	5.35404	0	2.83961	2.53389	0	2.84149	0	0	0.510465	0	0
GABA.CGE.VIP.CALB2	4	3.68009	1.56446	0.381601	0	0	0.0226853	0.460639	0	0.872916	0	0	1.80348	0	0	0	0	0	0	0	0	1.21292	0.0503368	6.66143	0.777446	0	1.87986	0	2.98844	0	0	0.0982608	0	0
GABA.CGE.VIP.CALB2	4	2.89598	2.45302	0.932068	0	0	0.0357956	0.070354	0	3.04011	0	0	2.68867	0	0	0	0.0180579	0	1.21727	0.95687	0	1.43025	0.356426	6.22938	2.62209	0.00906973	2.66104	0	0	0.00906973	0	0	0	0
GABA.CGE.VIP.CALB2	4	3.30279	2.43329	0.376885	0	0	0	0.229107	0	2.44179	0	0	2.83477	0	0	0	0	0	0.0226289	0.0226289	0	1.05067	0.445152	6.03732	3.17811	0.993011	1.53079	0	0	0.182538	0	0.673581	0	0
GABA.CGE.VIP.CALB2	4	3.1405	2.34455	0.574628	0	0	0.00920123	0.237494	0	2.6745	0	0	1.86395	0	0	0	0	0	0.259127	0.579818	0	0.523932	0	6.30833	3.64214	0.00920123	2.10085	0	0	0	0	0	0	0
GABA.CGE.VIP.CALB2	4	2.9077	2.55499	0.530645	0	0	0.00974299	0.913514	0	1.40948	0	0	0	0	0	0	0	0	1.98118	0	0	0.87753	1.34017	6.14778	2.80179	4.33959	3.50377	0	0	0	0.0336931	0.521969	0	0
GABA.CGE.VIP.CALB2	4	3.62546	2.30197	0.258567	0	0	0	0.320411	0	0	0	0	2.34756	0.555943	0	1.09487	0.00588411	0	0	0	0	0.406547	1.28491	6.07028	0	3.75461	2.47007	0	3.4004	0	0	0.874904	0	0
GABA.CGE.VIP.CALB2	4	3.33806	2.41287	0.636476	0	0	0	0.161435	0	1.83131	0	0	2.22092	0.240602	0	0	0	0	0.00459982	0.576141	0	1.461	0.606764	5.28373	3.22648	0.0182737	0.766678	0	0	0	0	0	0	0
GABA.CGE.VIP.CALB2	4	2.57163	1.55247	0.011408	0	0	0	0	0	1.97904	0	0	1.48333	0	0	0	0	1.13682	0	0.979693	0	1.88952	0	4.79061	3.3931	0.0170636	0.00572029	0	0	0	0	0	0	0
GABA.CGE.VIP.CALB2	4	2.73759	2.69137	0.810232	0	0	0	0.0252864	0	1.98345	0	0	1.56253	1.34281	0	0	0	0	0	0	0	0.296928	0	6.06384	2.85219	0.0127231	2.20037	0	0	0	0	0	0	0
GABA.CGE.VIP.CALB2	4	2.51876	2.39307	0.0873302	0	0	0	0.960195	0	1.87643	0	0	2.65037	0	0	0	0	0	0	0	0	0.974072	0	4.88943	3.3309	0.00606536	0	0	0	0	0	1.37542	0	0
GABA.CGE.VIP.CALB2	4	3.05131	2.39698	0.791698	0	0	0	0.398361	0	1.50206	0	0	1.34165	0	0	0	0	0	0	0	0	1.76501	0	5.38565	1.25437	0	1.81085	0	0.733888	0	0	0.42003	0	0
GABA.CGE.VIP.CALB2	4	3.51342	0.844656	0.699199	0	0	0	0.50494	0	0.932822	0	0	1.92937	0	0	0	0	0	0	0	0	0.57523	0	5.52881	2.21237	0	0.455176	0	2.10155	0	0	2.03022	0	0
GABA.CGE.VIP.CALB2	4	3.9431	1.95396	0.813389	0	0	0	0.871745	0	1.29965	0	0	2.11255	0	0.00710842	0	0	0	0	0.188037	0	1.6226	2.0138	5.50505	1.77993	0.0141667	3.04229	0	2.73503	0.00710842	0	1.20379	0	0
GABA.CGE.VIP.CALB2	4	2.74193	2.26008	0.386127	0	0	0	0.539602	0	1.98254	0	0	1.8814	0	0	0	0	0	0.606031	0.225115	0	1.62396	0	4.96282	3.10609	0	0.714679	0	0	0	0	0	0	0
GABA.CGE.VIP.CALB2	4	3.14946	2.45307	0.933863	0	0	0	1.037	0	2.0765	0	0	0	0	0	0	0.0119464	0	2.01434	0	0	1.26124	1.04548	6.17297	3.08123	0.102703	1.24753	0	0	0	0	0.459243	0	0
GABA.CGE.VIP.CALB2	4	4.08809	1.53301	0.409629	0	0	0.0117047	0	0	1.27984	0	0	3.24354	0	0	0	0	0	0	0.0290088	0	1.70322	1.24316	6.0846	3.13902	0.0347109	2.8726	0	2.45725	0	0.106023	0.0900123	0	0
GABA.CGE.VIP.CALB2	4	2.8833	1.27449	0.466378	0	0	0.00586602	0.12691	0	2.56961	0	0	2.93275	0	0	0	0	0	0.00586602	0	0	0.791212	0	5.6229	3.90805	0.00586602	0.401587	0	0	0	0	0.079149	0	0
GABA.CGE.VIP.CALB2	4	4.3744	2.11667	0.304914	0	0	0.0147453	0.398909	0.00493928	0.361675	0	0	2.15642	0	0	0.637249	0	0.910454	0.0716437	0.618752	0	1.31992	2.11906	5.91807	1.74376	2.89304	2.66301	0	3.96525	0	0.256299	0.49393	0	0
GABA.CGE.VIP.CALB2	4	3.70977	0.664572	0.3407	0	0	0	0.600158	0	1.42753	0	0	1.48646	0	0	0	0.00525799	0	0.0156917	0.623036	0	1.80013	0.570803	5.82621	2.62007	0.00525799	1.92681	0	2.14399	0	0	1.38885	0	0
GABA.CGE.VIP.CALB2	4	3.45418	1.98654	0.594483	0	0	0	0.719287	0	1.69106	0	0	0.995757	0	0	0	0.00685857	0	0	0	0	0.0793524	0	4.9707	1.81386	0.0136704	2.01813	0	2.56831	0	0	0.456222	0	0
GABA.CGE.VIP.CALB2	4	3.41985	0.780616	0.439772	0	0	0.00556382	0.0542924	0	0.923297	0	0	2.83625	0.698064	0	0	0.00556382	0.085507	0	0	0	0.130575	1.6283	5.84745	4.2079	0.201448	1.99536	0	0	0	0	0.669911	0	0
GABA.CGE.VIP.CALB2	4	3.69143	2.49811	0.304067	0	0	0	0.989362	0	2.48677	0	0	1.78341	0	0	0.0123917	0	0	0.27608	0	0	0.313225	0.946742	5.72971	2.99865	0.00621503	1.91662	0	0	0	0	1.18076	0.441386	0
GABA.CGE.VIP.CALB2	4	2.51954	2.66256	0.0315973	0	0	0	0.508887	0	1.81248	0	0	2.06235	0	0	0	0	0	1.00362	0.410969	0	1.30885	0	5.9142	3.04399	0.00533604	1.8849	0	0	0.00533604	0	0.763123	0	0
GABA.CGE.VIP.CALB2	4	3.23192	2.41515	0.0595487	0	0	0.00611699	0.0767431	0	2.86529	0	0	2.04045	0	0	0	0	0.900286	0	0.623336	0	1.33445	0	5.85781	1.39098	0.00611699	1.21989	0	0	0	0	0.17927	0	0
GABA.CGE.VIP.CALB2	4	3.15001	2.82163	0.586977	0	0	0.00572848	0	0	2.38704	0	0	2.70231	0	0	0	0	0.229938	0.00572848	0	0	0.139212	0	5.58058	0.450277	0	2.36785	0	0	0	0	0	0	0
GABA.CGE.VIP.CALB2	4	2.67214	2.19894	0.259388	0	0	0.0195501	0	0	2.24738	0	0	1.69415	0.435805	0	0	0.00655925	0	0.501684	0	0	1.69898	1.05624	6.16411	3.35455	0	1.64458	0	0	0	0	0.693288	0	0
GABA.CGE.VIP.CALB2	4	3.91812	3.19905	0.604938	0	0	0	0.580759	0	2.02803	0	0	1.82444	0.177078	0	0	0.00622972	0	0.313862	0	0	0.955429	0	5.54739	2.03295	0	1.87265	0	0	0	0	0.584249	0	0
GABA.CGE.VIP.CALB2	4	2.98616	2.41333	0.674291	0	0	0	0.742875	0	2.02637	0	0	0.924243	0.742875	0	0	0	0.853975	0.524915	0.0125868	0	1.29744	0	5.27305	0	0	2.70654	0	2.76285	0.0063132	0	1.3163	0	0
GABA.CGE.VIP.CALB2	4	2.67485	2.41664	0.879627	0	0	0	0.663923	0	1.92929	0	0	1.64195	0	0.00716813	0	0.0142852	0	0	1.30966	0	1.1105	0.931963	5.97271	0	0	2.55321	0	2.76939	0	0	0.177506	0	0
GABA.CGE.VIP.CALB2	4	3.26176	1.66515	0.329074	0	0	0.0306984	0.465189	0	2.11751	0	0.015467	0.455351	0	0	0.0306984	0	0	0.015467	1.07063	0	1.3365	0.715077	5.83609	0.015467	2.32966	2.07341	0	3.10003	0.015467	0	0.836956	0	0
GABA.CGE.VIP.CALB2	4	2.35861	0.914988	0.511895	0	0	0	0.0215631	0	1.95542	0	0	2.29844	0	0	0.498744	0	0.13568	0.00723948	0	0	1.49481	0.0701392	5.9022	3.25619	0	1.64578	0	0	0	0	0	0	0
GABA.CGE.VIP.CALB2	4	2.96889	0.156233	0.561477	0	0	0	0.194923	0	0.201228	0	0	2.5045	0.00765694	0	0	0.00765694	0.00765694	0.00765694	0.00765694	0.0227971	1.95617	0	5.90064	3.91064	0	1.02085	0	0.00765694	0.00765694	0	0	0	0
GABA.CGE.VIP.CALB2	4	3.20127	2.5456	0.468496	0	0	0	0	0	2.40994	0	0	0.882403	0.377406	0.00513841	0	0	0.307937	1.94098	0	0	0.995173	0.518803	5.8268	0	0	2.7198	0	2.59756	0	0	0.802558	0	0
GABA.CGE.VIP.CALB2	4	2.85604	1.50036	0.74109	0	0	0.00671496	0	0	2.70133	0	0	0.238625	0	0	0	0	0	0	0.0962764	0	1.40752	0.114467	5.55506	0	0	2.49849	0	2.53546	0	0	0.925325	0	0
GABA.CGE.VIP.CALB2	4	3.51019	2.52209	0.469787	0	0	0.00610026	0.592053	0	1.50544	0	0	1.09277	0	0	0	0.00610026	0.0708563	0	0.00610026	0	1.64347	0.896162	6.26929	0.751303	3.87119	3.34425	0	3.90614	0.00610026	0	0.0536073	0	0
GABA.CGE.VIP.CALB2	4	3.6546	2.1566	0.398791	0	0	0.00440489	0.835828	0	0.473	0	0.170092	1.89472	0.0389625	0	0	0	0.644479	0.00440489	0	0	1.38898	0.220915	5.42983	1.5807	0.0131569	1.61201	0	0	0	0	0	0	0
GABA.CGE.VIP.CALB2	4	2.83351	2.01629	0.62754	0	0	0	0.0608736	0	2.60828	0	0	0.874609	0	0	0	0	0	0	0.0500777	0	0.75601	0.934638	5.87681	0	2.45163	2.08456	0	2.94934	0.00568965	0	0.618359	0	0
GABA.CGE.VIP.CALB2	4	2.98464	1.09225	0.558606	0	0	0.00611434	0.613218	0	2.01341	0	0	2.18736	0	0	0	0	0	0.00611434	0	0	1.35964	0	5.60802	3.10129	0	1.1808	0	0	0	0	0.147954	0	0
GABA.CGE.VIP.CALB2	4	3.56556	1.08774	0.171938	0	0	0.0136338	0.36731	0	1.81905	0	0	1.93918	0	0	0	0	0	0.00910983	0.883137	0	1.84252	0	5.61325	1.28193	0	1.2109	0	0.00456529	0	0	1.58425	0	0
GABA.CGE.VIP.CALB2	4	3.12749	2.02759	0.758351	0	0	0.00544072	0.174746	0	2.66942	0	0	2.03546	0	0	0	0	0.496983	0	0	0	1.00408	0.70319	5.92838	0.327391	0.156253	2.75244	0	2.74861	0.00544072	0	0.0374777	0	0
GABA.CGE.VIP.CALB2	4	2.2547	0.301946	0	0	0	0	0	0	0	0	0	2.57916	0.479616	0	0	0.0111279	0	0	0	0	1.61955	0	6.10027	3.28354	0	0.0166458	0	0	0.00557945	0.00557945	0.0221334	0	0
GABA.CGE.VIP.CALB2	4	3.39935	1.75482	0.516235	0	0	0	0.0729956	0	0.0729956	0	0	0.462684	0	0	0	0.00580816	0.195178	0.896268	0.0115828	0	0.023033	0.00580816	5.28999	0.36652	4.34546	2.54043	0	2.02197	0	0	0.785789	0	0
GABA.CGE.VIP.CALB2	4	2.7507	1.25883	0.271676	0	0	0.0295739	0	0	1.79685	0	0	1.06781	0	0	0	0.00598517	0	0	1.39564	0	0.570074	0.00598517	4.91661	0	0	1.6198	0	3.62447	0	0	1.21528	0	0
GABA.CGE.VIP.CALB2	4	2.26405	2.12264	0.744684	0	0	0.020178	0.629391	0	0.00508281	0	0.262863	1.57842	0	0	0	0	0	0	0	0	1.57526	1.02371	5.66629	0	0.0101399	1.59199	0	0.083079	0	0	0	0	0
GABA.CGE.VIP.CALB2	4	3.56072	2.71208	0.182729	0	0	0.00526215	0.00526215	0	2.40822	0	0	0.648543	0	0	0	0	0	0	0	0	1.15988	0	5.82994	0	0.0104968	2.38371	0	0.283006	0	0	0.961058	0	0
GABA.CGE.VIP.CALB2	4	3.30331	2.64822	0.506177	0	0	0	0.583239	0	1.82626	0	0	0.740214	0	0	0	0	0	0	0.0591272	0	0.651903	0	5.75817	0	3.11259	2.18126	0	3.20297	0	0.573925	0.918745	0	0
GABA.CGE.VIP.CALB2	4	2.30708	1.25185	0.592618	0	0	0	0.273125	0	0.810222	0	0	2.91614	0.675874	0	0	0.635112	0.432926	0.21785	0	0	0.319819	1.26966	5.86421	3.9891	0.00782096	2.53594	0	0	0	0	0	0	0
GABA.CGE.VIP.CALB2	4	2.74554	1.92102	0.216714	0	0	0	0.635143	0	1.17092	0	0	2.40358	0	0	0	0.00669942	0	0	0.700623	0	0.541885	0	5.88761	3.46893	0.00669942	0.85774	0	0	0	0	0	0	0
GABA.CGE.VIP.CALB2	4	2.4866	1.17678	0.950927	0	0	0.006409	0	0	2.1113	0	0	2.05773	0	0	0	0	0	0.006409	0.771845	0	1.43094	0	5.46198	2.84019	0.0253932	0.675206	0	0	0.006409	0	0.546121	0	0
GABA.CGE.VIP.CALB2	4	2.93101	2.01461	0.2214	0	0	0	1.05563	0	1.903	0	0	0.616411	0	0	0	0.00602627	0	1.33781	0.0923161	0	1.1247	1.99753	5.71861	3.30974	1.63479	2.60448	0	0	0	0	0.95154	0	0
GABA.CGE.VIP.CALB2	4	2.75869	2.13523	0.426727	0	0	0	0.292219	0	2.12146	0	0	1.68436	0.0525875	0	0.00768395	0.00768395	0.0228769	0	0.201873	0	0.87064	1.27218	6.02869	0	2.82672	1.99761	0	3.61422	0	0.00768395	1.06652	0	0
GABA.CGE.VIP.CALB2	4	2.5539	1.58675	0.51509	0	0	0	0.569128	0	0.708059	0	0.202611	2.05807	1.01733	0	0.0527945	0	0.299002	0.00771487	0.0153707	0	1.19398	0.97149	6.0953	0.360261	0.00771487	2.22693	0	0.91728	0	0	0.397377	0	0
GABA.CGE.VIP.CALB2	4	2.56268	1.81684	0.115542	0	0	0	1.45834	0	1.71494	0	0	1.44688	0	0	0	0	0	1.30908	0	0	1.08233	0.137131	5.81044	3.24714	0.792307	2.04066	0	0	0.00813228	0	0.920524	0	0
GABA.CGE.VIP.CALB2	4	2.61347	2.07808	0.152526	0	0	0	0.140667	0	3.07254	0	0	0.85256	0	0	0	0	0	0.8642	0	0	0.27966	0	5.77988	1.81408	0.0136376	2.28044	0	0	0	0	0	0	0
GABA.CGE.VIP.CALB2	4	1.77221	1.29589	0.214211	0	0	0.00880863	0.624364	0	1.79157	0	0	1.03137	0.59552	0	0	0	0	1.49104	0	0	0.443014	1.0776	5.46007	3.75333	0	0.999316	0	0	0	0	0.921449	0	0
GABA.CGE.VIP.CALB2	4	3.03631	2.30079	0.615618	0	0	0	0.266394	0	1.46747	0	0	0.905952	0	0	0	0	0	0	0	0	0	0	5.35903	0	2.41735	2.55457	0	3.20755	0	0	0.0256469	0	0
GABA.CGE.VIP.CALB2	4	2.66438	1.0939	0.545358	0	0	0	1.07558	0	1.68114	0	0	3.25614	0.127123	0	0	0.0201295	0	1.27602	0.533502	0	0.691315	1.05926	5.95056	3.78846	0.0201295	1.90415	0	0	0	0	0	0	0
GABA.CGE.VIP.CALB2	4	3.65165	2.80454	0.260241	0	0	0.0170033	0	0	2.77112	0	0	0.889852	0	0	0	0.00569993	1.28435	0.00569993	0	0	1.14354	0.816816	5.49347	0	0	2.39038	0	0	0	0	0	0	0
GABA.CGE.VIP.CALB2	4	2.72963	2.3556	0.52191	0	0	0.0138877	0.470838	0	1.11013	0	0	1.97535	0	0	0.137008	0	0	1.03602	0	0	0.928737	1.62462	6.0377	2.5627	3.18839	2.5409	0	1.66511	0	0	0.38423	0	0
GABA.CGE.VIP.CALB2	4	2.44936	2.29734	0.201458	0	0	0	0.49106	0	2.41687	0	0	0.150415	0	0	0	0	0	1.50519	0	0	1.56951	1.26018	5.79835	2.59502	0.981634	2.59237	0	0	0	0	0	0	0
GABA.CGE.VIP.CALB2	4	3.59215	3.28857	0.436127	0	0	0	0.355871	0	1.85745	0	0	1.66472	0	0	0	0	0.379952	0	0	0	1.55235	0	5.35679	0	1.71157	2.52459	0	0.934399	0	0	0	0.452065	0
GABA.CGE.VIP.CALB2	4	3.274	3.15025	0.264024	0	0	0	0.0406359	0	1.80556	0	0	2.14223	0	0	0	0.0117797	0	0.00590721	0	0	1.01724	1.47503	6.39442	2.109	1.35262	2.56202	0	3.07023	0	0	0.245657	0	0
GABA.CGE.VIP.CALB2	4	3.18397	2.10588	0.161108	0	0	0	0.443437	0	1.91431	0	0.132075	1.8077	0.102174	0	0	0	0	0.00670102	1.04223	0.00670102	1.40429	0.489813	5.94831	0	0	1.98971	0	1.27211	0	0	0	0	0
GABA.CGE.VIP.CALB2	4	3.28128	2.57412	0.298163	0	0	0.0127839	0.881806	0	1.6351	0	0	1.94711	0	0	0	0	0	0.564799	0	0	1.46014	0	6.15977	1.99724	0	2.21382	0	0	0	0	0.999753	0	0
GABA.CGE.VIP.CALB2	4	2.93685	1.09916	0.0324967	0	0	0	0.428591	0	2.69865	0	0	0	0	0	0	0	0	0.804393	0	0	0.861818	0.553818	5.20132	0	0	2.03846	0	2.59177	0	0	0	0	0
GABA.CGE.VIP.CALB2	4	2.71609	0	0.323433	0	0	0	0	0	0.963544	0	0	0.576227	0	0	0	0	0	0	0.498852	0	0.015466	0	5.47235	0.440389	0	1.96038	0	2.71867	0	0	0	0	0
GABA.CGE.VIP.CALB2	4	3.04778	1.09797	0.62322	0	0	0	0.739477	0	2.64032	0	0	1.06644	0	0	0	0	0	0	0	0	1.31243	0.749876	5.25653	0	0	2.60979	0	3.1009	0	0	0.715678	0	0
GABA.CGE.VIP.CALB2	4	3.09732	2.03137	0.926524	0	0	0	0.503548	0	2.81718	0	0	0.277562	0.0803518	0	0	0	0.129102	0	0.175586	0	1.41951	0.331986	4.966	0	0	2.52549	0	3.34895	0	0	0.284992	0	0
GABA.CGE.VIP.CALB2	4	1.66454	1.30028	0.351804	0	0	0	0.802642	0	2.23132	0	0	2.03677	0	0	0	0	0	0	0.0132963	0	1.44279	0	5.32719	3.00274	0	1.97463	0	0	0	0	1.25362	0	0
GABA.CGE.VIP.CALB2	4	3.04894	1.80549	0.14969	0	0	0	0.0937534	0	2.36191	0	0	0	0	0	0.179466	0	0	0.670291	0.0678515	0	1.46668	0	4.86052	0	0.0069961	2.15133	0	2.86492	0	0	0.788697	0	0
GABA.CGE.VIP.CALB2	4	3.33687	0.00721844	0	0	0	0	0.0563392	0	1.57534	0	0	1.81306	0	0	0.0355822	0	0.862561	0.745937	1.20162	0	0.23175	0	6.17009	0.783037	3.17932	2.32173	0	2.82527	0	0.0143851	0.728608	0	0
GABA.CGE.VIP.CALB2	4	3.44355	2.13749	0.458229	0	0	0	0.0571174	0	1.53566	0	0	1.18765	0	0	0	0	0	0.00650989	0	0	0.105287	0	5.66856	0	0.200537	3.08318	0	2.81858	0	0	0	0	0
GABA.CGE.VIP.CALB2	4	2.74987	2.37456	0.36236	0	0	0	0.704362	0	2.81288	0	0	2.26797	0	0	0	0	0	1.11877	0.720037	0	1.37249	0.647477	5.69573	2.81862	0	0.976944	0	0	0	0	0.0105953	0	0
GABA.CGE.VIP.CALB2	4	2.91994	0.193128	0.476675	0	0	0	0.216275	0	2.09814	0	0	0.814004	0	0	0	0	0	0.329714	1.01306	0	1.32694	0.904204	5.4711	1.16137	0.00707618	2.07879	0	2.67607	0	0	0.369755	0.204769	0
GABA.CGE.VIP.CALB2	4	3.04498	1.91618	0.543873	0	0	0	0.495217	0	2.44995	0	0	1.9878	0.412983	0	0	0	0.186088	1.57091	0.333196	0	0.924388	1.30458	5.92545	0.0135431	0.00679446	2.63132	0	1.85623	0	0	0	0	0
GABA.CGE.VIP.CALB2	4	2.62683	1.02794	0.422291	0	0	0	0.613326	0	1.75317	0	0	2.26373	0	0	0	0	0	1.10576	0.123423	0	1.36774	0.714717	6.08601	3.52167	0.221647	2.03926	0	0.116952	0.136242	0	0	0	0
GABA.CGE.VIP.CALB2	4	2.55508	1.87612	0.44007	0	0	0.019551	0	0	2.76671	0	0	0.70963	0	0	0	0	0	1.41252	0.401179	0	0.201927	1.32024	5.82381	0	0	2.47529	0	3.06192	0	0	0	0	0
GABA.CGE.VIP.CALB2	4	3.31262	2.21506	0.332347	0	0	0	0.429127	0	1.07434	0	0	0.777742	0	0	0	0	0	0	0	0	0.912568	1.05093	5.54673	0	0.00614106	2.31966	0	2.02698	0	0	0	0	0
GABA.CGE.VIP.CALB2	4	2.46144	2.65549	0.122082	0	0	0	0.603521	0	2.73641	0	0	1.8325	0	0	0	0	0	0	0.00616414	0	0.690891	1.66953	6.14894	1.12011	0	2.42326	0.306473	0	0	0	0	0	0
GABA.CGE.VIP.CALB2	4	2.66525	1.87693	0.550175	0	0	0.0228413	0.556816	0	2.41544	0	0	1.72956	0	0	0.481213	0	0.221838	1.19358	0.0396362	0	0.729644	1.10388	6.04536	3.98331	0.00575941	2.8887	0	0	0	0	0	0	0
GABA.CGE.VIP.CALB2	4	3.25371	2.63732	0.443161	0	0	0.00624589	0.571346	0	2.94579	0	0	2.02534	0	0	0	0	0	0	0.59926	0	1.54684	0.592354	5.98157	0.00624589	0	1.81138	0	0	0	0	0.0429235	0	0
GABA.CGE.VIP.CALB2	4	3.18318	2.71972	0.488686	0	0	0.0112905	0.745293	0	2.9034	0	0	1.12608	0.0712074	0	0	0	0	0.985988	0	0	0.0389712	0.862135	5.89349	0	0	1.6937	0	0	0.00566117	0	0	0	0
GABA.CGE.VIP.CALB2	4	2.75801	2.1432	0.37411	0	0	0	0.693377	0	0.86893	0	0.241676	2.17608	0.0995732	0	0	0	0.345702	0.259783	0.699176	0	1.1124	2.1774	5.39975	0	0.00579978	2.69207	0	0	0	0	0	0	0
GABA.CGE.VIP.CALB2	4	3.14844	2.55444	0.0868156	0	0	0	0.381729	0	1.96795	0	0	3.37845	0	0	0	0	0	0	0.0112732	0	0.908045	0	5.28991	2.36747	0	1.06825	0	0	0	0	0.065808	0	0
GABA.CGE.VIP.CALB2	4	2.59566	1.09148	0.589475	0	0	0	0.0562092	0	0.492259	0	0	2.59757	0	0	0	0	0	0.00640378	0	0	2.2492	0	5.32566	3.13815	0.00640378	2.14426	0	0	0	0	1.73301	0	0
GABA.CGE.VIP.CALB2	4	3.04611	1.19032	0.270703	0	0	0	0.612809	0	1.04615	0	0	2.17723	0.00619846	0	0	0	0	0.945104	0.0123587	0	1.91251	1.02852	5.82646	3.05641	0	1.46906	0	0	0	0	1.09099	0	0
GABA.CGE.VIP.CALB2	4	2.85532	2.51391	0.47553	0	0	0	0.437909	0	1.33482	0	0	2.3231	0	0	0	0	0	0	0.0988971	0	1.75472	0	5.56819	3.06982	0.219161	0.96833	0	0	0.0785127	0.15767	1.55024	0	0
GABA.CGE.VIP.CALB2	4	2.65443	2.38446	0.412582	0	0	0	0	0	0.092451	0	0	2.21705	0	0	0	0	0	0	0.00876686	0.00876686	1.3692	0	4.84055	2.64697	0	0.904421	0	0	0	0	1.47734	0	0
GABA.CGE.VIP.CALB2	4	2.64753	0.482028	0.824587	0	0	0	1.17282	0	1.46697	0	0	2.05397	0	0	0.00701347	0	0	1.26633	1.67833	0	0.490683	0.577305	5.73887	3.27525	0.00701347	1.54049	0	0	0.0208945	0	0.824587	0	0
GABA.CGE.VIP.CALB2	4	2.68759	1.92464	0.769448	0	0	0	0.720387	0	1.3339	0	0	2.96477	0	0	0	0	0	1.79336	0.942552	0	1.63692	0.94889	5.70621	3.30346	0	1.72306	0	0	0	0	1.16406	0	0
GABA.CGE.VIP.CALB2	4	3.10329	1.0682	0.70481	0	0	0	0.622244	0	0.498438	0	0	2.5821	0	0.00470533	0.00938862	0	0	0	0.877754	0	0.783233	0.681225	5.7692	3.48922	0	1.19726	0	0	0.0460857	0	1.00291	0	0
GABA.CGE.VIP.CALB2	4	2.78544	2.72616	1.07471	0	0	0.0140339	0.144499	0	2.44425	0	0	3.14335	0.673471	0	0.0140339	0	0	0	0.49655	0	0.739694	0	5.61898	0.666238	0	0.889734	0	0	0	0	0.691327	0	0
GABA.CGE.VIP.CALB2	4	3.48743	2.46678	0.380642	0	0	0	0.350514	0	1.09541	0	0.0072118	1.26631	0	0	0	0	0.329911	0	0	0	0.824659	1.07586	5.5193	2.01389	0.0072118	1.77985	0	2.5946	0	0	0	0	0
GABA.CGE.VIP.CALB2	4	3.83152	2.25221	0.259292	0	0	0	0	0	1.94171	0	0	2.0381	0.129763	0	0	0	0	0	0.703245	0	1.2707	0.373951	5.32032	3.38841	0	0.885162	0	0	0	0	1.12645	0	0
GABA.CGE.VIP.CALB2	4	3.30612	2.55387	0.597686	0	0	0.00586698	0.777877	0	2.45887	0	0	1.72408	0.234906	0	0	0	0	0.385765	0	0	1.22918	0.94433	5.62817	2.06863	3.38888	2.08119	0	3.08032	0.00586698	0.440264	1.23945	0.234906	0
GABA.CGE.VIP.CALB2	4	3.11638	2.12943	0.235141	0	0	0.0122542	1.04061	0	2.44491	0	0	1.75614	0	0	0	0.345745	0	0.786626	0.00614589	0	0.843907	0.598793	5.18995	2.31002	0.00614589	1.31998	0	0	0	0	0.553758	0	0
GABA.CGE.VIP.CALB2	4	3.55919	1.93657	0.210866	0	0	0	0	0	1.76463	0	0	2.24992	0	0	0	0	0.00600111	0	0	0	1.14894	0	5.05486	0	0	1.03167	0	0	0	0	0	0	0
GABA.CGE.VIP.CALB2	4	3.08974	0.485822	0.161161	0	0	0.0067034	0.646055	0	1.01114	0	0.299918	2.66428	0	0	0	0.0067034	0	0.697581	0.0067034	0.238258	1.53299	1.53878	6.02572	3.0469	0	1.02572	0	0.149645	0	0	0	0	0
GABA.CGE.VIP.CALB2	4	3.05895	1.80599	0.450708	0	0	0	0	0	1.65476	0	0.00644986	2.21268	0	0	0	0	0	0	0.351077	0	2.34324	0.801748	5.895	3.26317	0.0128584	1.75248	0	0.230181	0.00644986	0	0.989115	0	0
GABA.CGE.VIP.CALB2	4	3.11362	1.07458	0.645622	0	0	0	0.498133	0	1.08844	0	0.404489	2.29172	0.387992	0.457592	0	0.151394	0	1.12359	0.71594	0	1.57885	0	5.46607	2.77087	0	0.623963	0	0	0	0	1.04628	0	0
GABA.CGE.VIP.CALB2	4	3.03189	2.58957	0.558431	0	0	0	0.219608	0	1.09801	0	0	3.00571	0	0	0.164336	0.154819	0	0	0.0855397	0	1.55831	0	5.79431	3.6055	0.210605	0.499235	0	0	0.105828	0	0	0	0
GABA.CGE.VIP.CALB2	4	3.36973	1.48363	0.177107	0	0	0.00603669	0.282896	0	1.23727	0	0	2.28401	0	0	0	0	0	0	0.0120372	0	1.61594	0	5.50213	3.23719	0.00603669	0.804335	0	0	0	0	0.323142	0	0
GABA.CGE.VIP.CALB2	4	2.15658	1.48827	0.645152	0	0	0	1.01188	0	1.26228	0	0	2.60668	0	0	0	0	0	1.54477	0	0	1.38294	0	5.99455	3.3545	0	2.2411	0	0	0	0.134689	0.0304282	0	0
GABA.CGE.VIP.CALB2	4	3.24914	1.60288	0.318725	0	0	0	0.0807826	0	1.21646	0	0.434145	2.66791	0	0	0	0	0	0.351133	0.7664	0	1.85085	0	5.43604	3.02546	0	0.726519	0	0	0	0	0.280353	0	0
GABA.CGE.VIP.CALB2	4	3.57472	0.829816	0.496562	0	0	0	0.775212	0	1.68889	0	0	2.37593	0	0	0	0	0	0.00674628	0	0	1.23259	0.624035	5.85179	2.7147	0.00674628	1.19026	0	1.17992	0	0	0.914677	0	0
GABA.CGE.VIP.CALB2	4	2.95625	0.664786	0.189788	0	0	0.00718083	0.686784	0	1.05561	0	0	3.14772	0	0	0	0	0	0.00718083	0	0	0.847255	0.746606	5.50837	3.37908	0.00718083	0.825397	0	0	0	0	1.25912	0	0
GABA.CGE.VIP.CALB2	4	2.46391	0	0.100121	0	0	0	0.0648623	0	0.524295	0	0	2.07319	0	0	0	0.733217	0	0	0.303216	0	1.73211	0	5.52367	2.93926	0	0.616272	0	0	0.259875	0	0.00952762	0	0
GABA.CGE.VIP.CALB2	4	2.86144	1.68378	0.0370493	0	0	0	0.448628	0	1.22836	0	0	2.58242	0	0	0	0	0	0	1.32919	0	1.47403	1.31713	5.90505	2.75639	0	1.28632	0	0	0	0	0.828923	0	0
GABA.CGE.VIP.CALB2	4	3.56588	0.824883	0.502264	0	0	0	0	0	1.66976	0	0	1.95534	0	0	0	0	0	0.946538	1.40889	0	0.0748046	0	5.88649	2.86783	0.00773735	0.835044	0	0	0	0	0.698014	0	0
GABA.CGE.VIP.CALB2	4	2.86848	2.58217	0.896186	0	0	0	0.0652755	0	2.25827	0	0	2.33461	0.647426	0	0	0	0	0	0.170161	0	1.08957	2.19271	5.41638	0	0	1.96546	0	1.54967	0	0	0	0	0
GABA.CGE.VIP.CALB2	4	3.10051	1.50509	0.466945	0	0	0	0.994246	0	1.08203	0	0	2.60616	0	0	0	0	0	1.53403	0	0	0.721724	0.721724	5.40328	4.1773	0.0163958	1.81501	0	0	0	0	0	0	0
GABA.CGE.VIP.CALB2	4	2.96644	2.29873	0.575842	0	0	0	0.365152	0	2.13049	0	0	2.6903	0	0	0	0	0	0.0145842	1.55735	0	0.783891	0	5.65581	0.462251	0	2.24884	0	0	0	0	0	0	0
GABA.CGE.VIP.CALB2	4	3.38339	1.93042	0.523104	0	0	0	1.19001	0	0.806171	0	0	0.282716	0.475235	0	0.424958	0	0.0965808	1.24987	0	0	0.568787	2.28344	5.9194	3.52635	3.73979	3.05031	0	0	0	0.0222829	0.193973	0.0862989	0
GABA.CGE.VIP.CALB2	4	2.61672	2.62757	0.486784	0	0	0	0.284026	0	2.10733	0	0	2.34096	0	0	0	0	0	0	0.0294235	0	0.189814	1.01045	5.32719	3.36967	0	1.47232	0	0	0	0	0.0438169	0	0
GABA.CGE.VIP.CALB2	4	2.25469	0.853954	0.647162	0	0	0	0.490926	0	1.60578	0	0	1.87823	0.927305	0	0	0	0	0	0	0	1.8194	1.19628	5.74659	4.0891	2.06364	2.31265	0	0	0	0	0	0	0
GABA.CGE.VIP.CALB2	4	3.57536	2.72301	0.317325	0	0	0	0.885325	0	2.03497	0	0	1.01603	0	0	0	0	1.42053	1.10491	0.350748	0	1.27837	0	5.79689	0	0	2.68791	0	0.317325	0	0	0.141251	0	0
GABA.CGE.VIP.CALB2	4	2.86552	1.91031	0.142334	0	0	0	0.690269	0	0.965165	0	0	2.37503	0	0	0	0	0	1.37233	0.0557759	0	0.252161	0.546136	6.01083	3.70513	0	2.33327	0	0	0	0	0	0	0
GABA.CGE.VIP.CALB2	4	1.84462	1.92273	0.294601	0	0	0	0.683629	0	1.22323	0	0	1.28109	0	0	0	0	0	1.1271	1.11696	0	1.01511	0	4.88523	0	0	1.4258	0	0.435044	0	0	1.62223	0	0
GABA.CGE.VIP.CALB2	4	3.19079	1.45358	0.0321001	0	0	0	0.151092	0	2.0116	0	0	1.2421	0	0	0	0	0	0	0.0321001	0	1.3407	0	5.34975	0	0	2.11711	0	0.657361	0	0.81355	0.0161788	0	0
GABA.CGE.VIP.CALB2	4	2.47599	2.08475	0.202747	0	0	0	0.460195	0	2.60688	0	0	2.04095	0	0	0	0	0	0	0.724587	0	0.524298	0	5.74726	0	0	1.37798	0	0	0	0	0	0	0
GABA.CGE.VIP.CALB2	4	3.23872	2.03038	0.762431	0	0	0	0	0	1.60835	0	0	2.54592	0	0	0	0	0.0300372	0	0.513328	0	0.447322	0	5.12628	1.39854	0	1.26586	0	0	0	0	0	0	0
GABA.CGE.VIP.CALB2	4	3.37341	1.97717	0.357417	0	0	0	0.0714594	0	1.98126	0	0	0.788461	1.31532	0	0	0	0.150972	0	0.282112	0	0.112006	1.23677	5.37532	0	3.09206	2.21194	0	3.53828	0	0	1.86207	0	0
GABA.CGE.VIP.CALB2	4	2.21549	0.417702	0.247514	0	0	0	0.971467	0	1.7829	0	0	1.17096	0	0	0	0	0	0.840607	1.79732	0	1.16424	1.16424	5.53585	1.92173	0.0213728	1.38699	0	0	0	0	0.388836	0	0
GABA.CGE.VIP.CALB2	4	2.47765	2.21354	0.0810593	0	0	0	0	0	1.80272	0	0	0.907297	0	0	0	0	0	0	0	0	1.25617	0	4.89647	0	0	2.06719	0	2.96017	0	0	0	0	0
GABA.CGE.VIP.CALB2	4	3.23238	2.43433	0.219994	0	0	0.0155845	0.0948326	0	2.2105	0	0	0.224187	0	0	0	0	0	0.982127	0.516041	0	0.716426	0.986041	6.03892	2.49055	0.0155845	1.97537	0	0	0	0	1.31016	0	0
GABA.CGE.VIP.CALB2	4	3.01037	2.97808	0.659945	0	0	0	0.497733	0	2.56057	0	0	1.30395	0	0	0.016265	0	0	0.0216284	0	0	0.921908	1.27229	5.69577	0.4254	0.0269632	2.47371	0	0.941286	0	0.103747	0.00545111	0	0
GABA.CGE.VIP.CALB2	4	2.78183	2.81678	0.595171	0	0	0	0.683648	0	3.14892	0	0	1.4284	0	0	0	0.0050705	0	1.15872	0	0	1.48524	0.802081	5.68931	0.453888	0.0050705	1.69056	0	0	0.0050705	0	0	0	0
GABA.CGE.VIP.CALB2	4	2.68606	0.49542	0.836047	0	0	0.0148013	0.348907	0	1.20033	0	0	1.97796	0	0	0	0	0.0245484	1.18979	0	0	0.961415	0.741208	5.5334	3.25067	0.00989181	1.02937	0	0	0	0	0.173009	0	0
GABA.CGE.VIP.CALB2	4	2.86292	2.13983	0.239476	0	0	0	0.655278	0	2.53591	0	0	1.16101	0	0	0.107894	0	0	1.06512	0.550097	0	1.08457	1.48405	5.25651	0.00709537	3.23372	2.03012	0	3.41354	0	0	0	0	0
GABA.CGE.VIP.CALB2	4	2.58837	2.19089	0.749816	0	0	0	0.316418	0	0.961532	0	0.877226	1.83579	0.104332	0	0	0.0167768	0.0812036	0.0250608	0	0	0.635631	0.845048	5.44814	0.00842359	0.0332768	1.31476	0	0.00842359	0	0	0	0.00842359	0
GABA.CGE.VIP.CALB2	4	2.62143	1.77656	0.117739	0	0	0	0	0	0.974705	0	0	1.05034	0.817628	0	0	0	0.00519275	0	0	0	0.523086	2.32692	5.09639	0	0.0103587	1.5633	0	2.33097	0.00519275	0	0	0	0
GABA.CGE.VIP.CALB2	4	2.5932	1.6984	0.122217	0	0	0	0.480005	0	0.83536	0	0.203826	0.978975	0	0	0	0	1.16274	0	0	0	1.71684	2.42514	5.15244	0.465917	0	1.82089	0	0	0	0.0278687	0	0	0
GABA.CGE.VIP.CALB2	4	3.04278	1.585	0.418449	0	0	0.00588722	0	0	1.623	0	0	1.16206	0.857836	0	0	0	0	0	0.0405007	0	0.358397	0.97802	5.45494	0	2.97158	2.27551	0	3.28299	0	0	0	0	0
GABA.CGE.VIP.CALB2	4	2.4125	1.97055	0.722268	0	0	0	0.649055	0	2.57736	0	0	2.06705	0	0	0	0	0	0	0.0406939	0	1.33045	1.2465	5.4142	0	0.00689836	1.7405	0	0	0	0	0	0.00689836	0
GABA.CGE.VIP.CALB2	4	2.89249	2.33078	0.174742	0	0	0	0.432428	0	1.57648	0	0	0	0	0.567446	0	0	0	1.03458	0.136615	0	1.81422	1.23849	4.86674	0	1.43845	2.26361	0	3.12866	0	0	1.22175	0	0
GABA.CGE.VIP.CALB2	4	2.91109	1.35071	0.238881	0	0	0	0.657212	0	1.38281	0	0	1.97824	0.0237016	0	0	0	0	0	0.599647	0	1.246	1.24081	5.46584	3.15486	0.00597826	2.14864	0	0	0	0	0	0.0237016	0
GABA.CGE.VIP.CALB2	4	2.96242	2.36624	0.252761	0	0	0	0.154604	0	2.38427	0	0	1.9703	1.34955	0	0	0	0	1.07138	0	0	0.131418	0	5.85641	1.40357	2.01319	1.59583	0	2.26529	0	0	0	0	0
GABA.CGE.VIP.CALB2	4	2.80013	2.56815	0.773229	0	0	0.0250478	0.367329	0	0.414507	0	0	0	0.236118	0	0	0	0.912341	0.174148	0.00632102	0	1.09564	1.01395	5.35873	0	0	1.98568	0	0.467537	0	0.184746	0	0	0
GABA.CGE.VIP.CALB2	4	3.07441	3.13817	0.64012	0	0	0.043555	0.190511	0	2.40342	0	0	1.19266	0.211319	0	0	0	0.623213	0.653443	0	0	1.09333	0.0313031	5.5885	0	0.0188992	2.59772	0	0.961397	0	0	0	0	0
GABA.CGE.VIP.CALB2	4	2.25645	2.26078	0.573825	0	0	0.00589893	0.399486	0	2.65777	0	0	1.45892	0	0	0	0	0	0.259142	0.772662	0	1.49936	0.764432	5.62698	3.3478	0.00589893	1.93986	0	0	0.00589893	0	0	0	0
GABA.CGE.VIP.CALB2	4	2.41406	2.93564	0.600981	0	0	0	0.225132	0	2.8437	0	0	1.5618	0	0	0	0	0	0	1.14618	0	0.597331	0	5.69495	0	0.0132013	1.36699	0	0	0.00662243	0.0580799	0	0.53705	0
GABA.CGE.VIP.CALB2	4	2.3283	1.31425	0.452041	0	0	0.0144255	0.945498	0	2.01939	0	0	1.28387	0	0	0.0380151	0	0	0.173021	0.0519063	0	1.1985	0.337899	5.50522	0.823583	0.00964012	1.69136	0	0	0	0	1.01631	0	0
GABA.CGE.VIP.CALB2	4	2.90982	2.04633	0.657847	0	0	0.0180832	1.36289	0	1.81874	0	0	1.7535	0	0	0	0	0	1.83731	0.00606413	0	1.22096	1.35036	5.46864	3.68434	0.00606413	1.7279	0	0	0	0	0.844148	0	0
GABA.CGE.VIP.CALB2	4	3.44507	2.06804	0.608401	0	0	0	0.23381	0	1.9694	0	0	0.0841586	1.61046	0	0.17887	0	0.0653565	0.305983	0.184501	0	0.349773	0.470692	4.98204	0	2.87447	2.49517	0	3.09769	0	0	0.0526225	0	0
GABA.CGE.VIP.CALB2	4	3.61681	2.72309	0.750154	0	0	0	0.49576	0	2.65618	0	0	1.29866	0.58262	0	0	0	0	0.694511	0	0	0.536789	0	5.40747	0.192276	0	1.22402	0	0	0	0	0.665483	0	0
GABA.CGE.VIP.CALB2	4	3.52009	2.52215	0.78473	0	0.00631944	0.0125992	0.651919	0	2.76976	0	0	1.74114	0.317746	0	0	0	0	0.48711	0.0494714	0	0.275335	0.700277	5.4041	0.414422	0.0125992	1.49687	0	0	0.0674099	0	0.157999	0	0
GABA.CGE.VIP.CALB2	4	2.97002	1.3623	0.151976	0	0	0.00545617	0.026988	0	1.66569	0	0	0.937578	0	0	0	0.00545617	0	0.696481	0.224479	0	1.35102	0	5.47163	0.488074	0.00545617	1.99719	0	0.00545617	0	0	0.0108827	0.0108827	0
GABA.CGE.VIP.CALB2	4	3.28514	1.99122	0.118234	0	0	0	0.414057	0	0.839453	0	0	0.71138	0.506985	0	0	0.00544201	0	0.373574	0.576798	0	0.26665	0.975851	5.53318	1.63739	0	2.18192	0	2.9859	0	0	0.0887125	0	0
GABA.CGE.VIP.CALB2	4	2.71317	1.60747	0.0911729	0	0	0.025137	0.131033	0	0.917042	0	0	0	0	0	0	0	0.061696	0.96908	0	0	0.174723	1.69765	5.28479	0	0.00634373	2.55825	0	3.14156	0	0	0.971492	0	0
GABA.CGE.VIP.CALB2	4	2.66444	2.85607	0.439584	0	0	0	0	0	2.8063	0	0	2.49264	0	0	0.500463	0	0	0	0.0444607	0	0.993862	0.826794	5.14505	2.48076	0	0.161575	0	0	0	0	0	0	0
GABA.CGE.VIP.CALB2	4	2.85502	2.08861	0.346511	0	0	0	0.202003	0	0.206565	0	0	0.42999	0	0	0.627552	0	0	1.50107	0.654087	0	1.48978	0.490039	5.90406	0.503659	3.77066	2.92528	0	1.30003	0	0	0.448029	0	0
GABA.CGE.VIP.CALB2	4	3.516	2.88687	0.107868	0	0	0	0.147955	0	1.74118	0	0	1.89368	0.191212	0	0	0	0.0390911	0.00567887	0.331429	0.00567887	1.26412	0	5.43546	0	0.0113257	2.00241	0	1.52217	0.00567887	0.276814	0	0	0
GABA.CGE.VIP.CALB2	4	2.79007	1.59026	0.47845	0	0	0.0103458	1.22292	0	0.821515	0	0	1.95853	0	0	0	0	0	0.883575	0	0	1.51658	0.812326	5.77051	3.36768	0.0103458	2.52588	0	0	0	0.00518629	0	0	0
GABA.CGE.VIP.CALB2	4	1.93643	0	0.143167	0	0	0	0	0	0.288468	0	0	2.02291	0	0	0	0	0	0.00529362	0	0	0.0617458	0	5.786	3.10195	0.00529362	0	0	0	0	0	0	0.705262	0
GABA.CGE.VIP.CALB2	4	2.77505	1.60118	0.554611	0	0	0.0163383	0.19855	0	0.852394	0	1.7052	1.93111	0	0	0	0	0.233933	0.00547582	0.180378	0	1.32346	0	5.02275	0	0	0.738444	0	0	0	0	0	0	0
GABA.CGE.VIP.CALB2	4	3.12427	1.81278	0.630912	0	0	0.00569365	0.63697	0	0.0446666	0	0.521877	0.469715	1.88901	0	0	0	0	1.17504	0	0	1.11883	0.836193	4.70335	0.00569365	1.44398	2.54381	0	3.3335	0	0	0.853366	0	0
GABA.CGE.VIP.CALB2	4	3.80064	1.90902	0.148864	0	0	0	0.314216	0	0.360043	0.828321	0	1.43372	0.627078	0	0.652475	0	0	0	0.274354	0	1.13229	0.306369	5.97902	0	3.15855	2.90651	0	3.34771	0	0	1.27954	0	0
GABA.CGE.VIP.CALB2	4	2.61067	0.424773	0.365362	0	0	0.00549781	0.338218	0	1.38329	0	0	0.661245	0	0	0	0.00549781	0.00549781	0.587441	0.877884	0	1.49315	0.909461	5.43326	0.68097	0	2.0222	0	0	0	0	0	0	0
GABA.CGE.VIP.CALB2	4	2.69446	1.40216	0	0	0	0.00640286	0.109411	0	1.95315	0	0	1.01988	0	0	0	0.00640286	0	0	0.418905	0	0.564155	0.176221	5.93083	1.26697	0	2.26119	0	0.694172	0	0	1.16416	0.0501105	0
GABA.CGE.VIP.CALB2	4	3.11233	1.53553	0.320318	0	0	0	0.0750243	0	0.612494	0	0	0.407743	0.57611	0	0	0	0.77134	0.407743	0	0	2.02873	1.24045	5.68778	0	0	0.660068	0	0.0236896	0	0	0	0	0
GABA.CGE.VIP.CALB2	4	2.43472	0	0.721385	0	0	0.0127341	0	0	1.5792	0	0	0.0560683	0	0	0	0.0190409	0	2.05477	0.191823	0	1.92148	0	5.81806	0	0	2.54618	0	2.8302	0	0	0.00638732	0	0
GABA.CGE.VIP.CALB2	4	2.36522	1.2635	0.190879	0	0	0	0.458606	0	2.61351	0	0	0	0	0	0	0.00698599	0	0.00698599	0.690887	0.00698599	1.58448	1.06948	5.43167	0	0	2.37895	0	3.25699	0	0	0	0	0
GABA.CGE.VIP.CALB2	4	3.20353	2.93461	0.0510318	0	0	0.00652322	0.222097	0	2.75485	0	0	2.45288	0.134513	0	0	0	0	0.772388	0.0321987	0	0.297777	1.28768	5.6022	1.12318	0.00652322	1.58399	0	0.00652322	0	0.349847	0	0	0
GABA.CGE.VIP.CALB2	4	3.77799	1.86046	0.504624	0	0	0	0.576294	0	1.47336	0	0	2.15119	0	0.00584328	0.326989	0	0	0.0513996	0.582859	0	0.830796	0.916394	6.11517	1.17154	1.3198	2.16876	0	2.134	0	0	1.26674	0	0
GABA.CGE.VIP.CALB2	4	1.9417	1.71967	0.233336	0	0	0	0.842533	0	1.91665	0	0	1.35228	0	0	0	0	0.00817915	1.03496	0	0	1.08059	0	5.32814	3.0929	0	0.769177	0	0	0	0	0.0162919	0.856581	0
GABA.CGE.VIP.CALB2	4	3.87567	2.64176	0.706994	0	0	0.00673965	0.382951	0	2.49799	0	0	1.79695	0.167703	0	0	0	0	1.41688	0	0	0.571496	0.126851	5.8585	3.00091	0	2.79592	0	2.95055	0	0	1.16457	0	0
GABA.CGE.VIP.CALB2	4	2.94491	1.30028	0.326418	0	0	0	0.509475	0	0	0	0.168481	2.43164	0	0	0	0	0	0.303326	0.99873	0	1.51649	0.528306	5.57531	3.86385	0	1.89472	0	0	0	0	0	0	0
GABA.CGE.VIP.CALB2	4	3.73482	2.18974	0.212834	0	0	0.0395773	0.768077	0	0.638272	0	0	0.619437	0	0	0	0	1.04092	1.96803	0.136578	0	1.1742	1.62977	6.15928	2.01352	3.7156	2.87148	0	1.25506	0	0	1.5801	0	0
GABA.CGE.VIP.CALB2	4	3.40017	2.42254	0.691302	0	0	0.0472956	0.29194	0	1.92474	0	0	2.7129	1.16321	0	0	0	0.0668999	0.701646	0.0137428	0	0.177081	0	5.62297	2.74453	0	1.96238	0	1.17396	0	0	0	0	0
GABA.CGE.VIP.CALB2	4	3.08138	2.35829	0.388187	0	0	0.0172038	0	0	1.83845	0	0	0.537346	0	0	0	0.0228733	0	0.00576755	0.0832038	0	1.08743	0.784608	5.26392	0	0.011502	2.04473	0	3.0313	0	0	0.896838	0	0
GABA.CGE.VIP.CALB2	4	2.92507	2.28938	0.547135	0	0	0.0910199	0.477838	0	1.85591	0	0	2.24784	0	0	0	0	0.0202138	0.145441	0.00678343	0	0.73344	1.16481	5.96236	0	0.00678343	2.19469	0	3.02211	0.00678343	0	0.486244	0	0
GABA.CGE.VIP.CALB2	4	4.22715	2.26647	0.293009	0	0	0.0220794	0.567941	0	0.206063	0	0	1.62088	0.329797	0	0.313614	0	0	0	0.0436818	0	0.725622	1.33694	6.20418	1.73151	2.68646	2.61923	0	3.61885	0	0.154811	1.19207	0	0
GABA.CGE.VIP.CALB2	4	3.13745	1.61024	0.611533	0	0	0.0448696	0.803495	0	0.00572004	0	0	1.93524	0.349783	0	0.321072	0	0.520361	0	0.566986	0	1.68318	1.30573	5.6031	3.18224	0	2.62991	0	0	0	0	0.753461	0	0
GABA.CGE.VIP.CALB2	4	3.65842	1.34538	0.439071	0	0	0.0253171	0.895547	0	0.50696	0	0.50696	2.10317	0.680229	0	0	0	0.570532	0.388214	0.479562	0	1.2097	2.0746	5.60197	3.02756	0.00638961	3.07604	0	0	0.00638961	0	0.401173	0	0
GABA.CGE.VIP.CALB2	4	3.32618	2.67452	0.631535	0	0.00659844	0.0886368	0.712646	0	2.21226	0	0	2.1602	0.385289	0	0	0	0	0.135968	0.429339	0	0.725548	1.1521	5.43866	1.3794	0	1.37773	0	0.00659844	0	0	0.890602	0.147459	0
GABA.CGE.VIP.CALB2	4	1.23032	1.98673	0.158808	0	0	0.037534	0.125633	0	1.1549	0	0	0.779	0.00635432	0	0	0.0313754	0	0	0.00635432	0	2.1022	0	5.04122	2.42039	0.0313754	1.38371	0	0	0.00635432	0	1.56313	0	0
GABA.CGE.VIP.CALB2	4	3.18992	2.53073	0.279207	0	0	0.0624265	1.1741	0	0.512781	0	0	0.481436	0	0	0	0	0.288905	0.012801	0.234366	0	1.32363	0.858315	4.92084	0	2.22202	2.78356	0	4.00897	0	0	0	0	0
GABA.CGE.VIP.CALB2	4	3.51938	2.50306	0.448527	0	0	0.0290532	0.510566	0	1.1021	0	0	1.11185	0	0	0.697236	0.00587856	0.0117228	0.0460884	0.132344	0	0.773521	1.09424	5.85456	0	2.77511	2.51457	0	3.92481	0	0	0.565636	0	0
GABA.CGE.VIP.CALB2	4	2.14136	2.09929	0.132421	0	0.00671972	0.28038	0.654251	0	0.96761	0	0.00671972	1.56777	0	0	0.00671972	0	0	0	0.00671972	0	1.18339	0	5.69535	3.13551	0.00671972	0.377394	0	0.00671972	0	0	1.38806	0	0
GABA.CGE.VIP.CALB2	4	3.06893	2.09173	0.180437	0	0	0.185925	0.30449	0	0.234008	0	0	0.436371	0	0	0	0.00656972	0.444855	1.29465	0.309339	0	1.55686	0	4.50888	0	0	1.25411	0	2.60199	0.00656972	0	0.264824	0	0
GABA.CGE.VIP.CALB2	4	2.85489	2.11896	0.370236	0	0.0117225	0.298509	0.517608	0	1.61595	0	0	0.0404412	0	0.00587842	0.0117225	0	0	1.90755	0	0	0.920007	1.54433	6.16403	2.60086	4.16259	3.25119	0.167857	0.0233092	0	0	1.17569	0	0
GABA.CGE.VIP.CALB2	4	3.96686	2.86927	0.351314	0	0	0.0532248	0.241638	0	1.77556	0	0	1.04652	0.00545178	0	0.010874	0	0	1.03688	0.400118	0	0.58065	1.05417	5.67128	2.80191	0.0988192	1.48539	0	2.79057	0	0.010874	1.20261	0.312082	0
GABA.CGE.VIP.CALB2	4	3.47214	2.43927	0.48722	0	0	0.0143834	0.504863	0	0.821929	0	0.00481748	0.721528	0	0.00961187	0	0.00961187	0	0.00481748	0.00481748	0	1.79306	1.00564	5.07217	0	1.40633	2.0226	0	3.46326	0.00481748	0.216284	0.993195	0.5752	0
GABA.CGE.VIP.CALB2	4	3.05001	1.89513	0.613026	0	0	0.0113677	0	0	1.38941	0	0.0057	1.35018	0	0	0.0057	0	0	1.15262	1.01338	0	1.01959	0.311771	5.66727	2.84457	0	1.38941	0	0	0	0.415062	0.0609813	0	0
GABA.CGE.VIP.CALB2	4	2.53459	2.00628	0.252965	0	0	0.0267924	0.0477212	0	2.66558	0	0	1.0817	0	0	0.00541621	0.00541621	0	0	0.662454	0	0.962567	0	5.31493	0	0	1.97513	0	1.90893	0	0	0.642659	0	0
GABA.CGE.VIP.CALB2	4	2.82963	2.69431	0.298614	0	0.00619487	0.0366063	0.0485166	0	1.90649	0	0.00619487	1.86115	0	0	0	0	0	0.00619487	0	0.00619487	0.585231	0.0184707	5.18525	0	0	2.07985	0	2.53679	0	0.139012	0.632549	0	0
GABA.CGE.VIP.CALB2	4	2.7302	2.20032	0.318552	0	0	0.0451363	0.827242	0	2.87336	0	0.00575472	1.18245	0.00575472	0.0228228	0	0	0.00575472	1.06428	0	0	0.305881	1.2138	5.65381	1.48276	0	2.42955	0	0	0	0	0	0	0
GABA.CGE.VIP.CALB2	4	3.04145	2.45055	0.310843	0	0	0.0109871	0.807755	0	2.53458	0	0	1.86011	0	0	0	0	0.00550865	0.26952	0	0	1.06478	0.78534	5.87836	2.04842	0.0272447	2.20013	0	1.6126	0	0	0.322914	0	0
GABA.CGE.VIP.CALB2	4	3.20765	2.20403	0.429868	0	0	0.0168174	0.373118	0	2.29349	0	0	0.94672	0	0	0	0	0	0.253334	0.00563728	0	1.04085	1.71191	5.28528	1.11768	0.0168174	2.47886	0	3.36594	0.00563728	0.180538	0.611029	0	0
GABA.CGE.VIP.CALB2	4	1.96692	2.01297	0.253697	0	0	0.00599826	0.745263	0	3.11201	0	0	2.14034	0	0	0	0.00599826	0	0	0.00599826	0	1.22215	0	5.10356	3.54978	0.00599826	0.750958	0	0.160819	0.0119607	0	0	0	0
GABA.CGE.VIP.CALB2	4	3.24296	3.02899	0.252504	0	0	0.0124116	0.145062	0	1.97158	0	0	0	0	0	0	0	0	0	0	0	0.753302	0	5.2511	0	0.00622503	3.13573	0	2.06609	0	0.212923	0	0	0
GABA.CGE.VIP.CALB2	4	3.34124	0.623276	0.149688	0	0	0.0669128	0.244364	0.0114677	1.00854	0	0	2.52011	0	0	0	0	0.0114677	0.0114677	0	0	1.30803	0	5.40821	2.64797	0	1.90691	0	0	0	0	1.72105	0	0
GABA.CGE.VIP.CALB2	4	3.30752	1.92351	0.479823	0	0	0.0298352	0.732442	0	1.39339	0	0	2.06108	0	0	0	0	0	0	0	0	0.779831	0	5.24477	3.83024	0	1.13457	0	0	0	0	0.937902	0	0
GABA.CGE.VIP.CALB2	4	3.92845	2.33788	0.966104	0	0	0.0259143	0.422034	0	1.43264	0	0	1.83687	0	0	0	0	0	0	0.893602	0.0130411	0.263832	0	5.94452	2.55462	0	1.36122	0	3.0516	0.0130411	0	1.30943	0	0
GABA.CGE.VIP.CALB2	4	3.54017	2.72591	0.368545	0	0	0.0684953	0.0493992	0	2.20183	0	0	2.73186	0	0	0.010077	0.010077	0	0	0	0	1.26186	0.615589	5.18068	2.64944	0	1.21789	0	0.010077	0	0	0	0	0
GABA.CGE.VIP.CALB2	4	3.75771	2.92379	0.298788	0	0	0.0413425	0	0	0	0	0	0	0	0	0	1.80081	2.1478	0.395686	1.97912	0	0.146939	1.51878	3.29156	0	4.16606	3.82554	0	1.79029	0	0	0	0	0
GABA.CGE.VIP.CALB2	4	3.14556	2.90378	0.425629	0	0	0.0125531	0.947412	0	2.09022	0	0	2.31331	0	0	0.0125531	0	0	0	1.79215	0	1.74032	1.1898	5.75817	2.6718	0	0.527548	0	0	0	0	0.592477	0	0
GABA.CGE.VIP.CALB2	4	3.01615	1.42404	0.31265	0	0	0	0	0	0.977758	0	0	1.81902	0	0	0	0	0	0	1.48127	0.0135026	2.18126	0	5.242	2.21298	0	1.37714	0	0	0	0	0.566037	0.361174	0
GABA.CGE.VIP.CALB2	4	2.74293	1.13852	0.749964	0	0	0.0123339	0.307409	0	1.54719	0	0	1.92355	0	0	0	0	0	0	0.88673	0	1.39637	0	5.26493	2.31834	0	0.988721	0	0	0	0	0	0	0
GABA.CGE.VIP.CALB2	4	3.75726	1.76331	0.186465	0	0	0.0145354	0.582576	0.0145354	1.20238	0	0	1.45389	0	0.0145354	0	0	0	0	1.50718	0	1.44702	0	5.7294	2.06266	0	1.09569	0	0.514925	0	0	0.871691	0	0
GABA.CGE.VIP.CALB2	4	2.47562	2.20655	0.264265	0	0	0	0.893482	0	0.498466	0	0	3.3445	0.754901	0.0271263	0	0	0	0	0	0	1.19272	1.8611	5.78768	3.75934	0	2.8676	0	0	0.0136551	0	0	0	0
GABA.CGE.VIP.CALB2	4	3.50338	1.87929	0.314755	0	0	0.0291644	0	0	2.08116	0	0	2.20108	0	0	0	0	0	0.0146885	0	0	1.53472	0	5.83324	3.16291	0	0.536641	0	3.56846	0	0	0	0	0
GABA.CGE.VIP.CALB2	4	1.98394	2.2747	0.452515	0	0	0	0.178966	0	2.17831	0	0	3.10244	0	0	0.230075	0.00780864	0	1.25966	0.278697	0	1.22342	0.0899051	5.51887	3.53746	0	1.30531	0	0	0	0	1.16158	0	0
GABA.CGE.VIP.CALB2	4	2.22023	1.35662	0.427463	0	0	0	0.128344	0	1.40375	0	0	3.14475	0	0	0	0.00718175	0	0.729446	0	0	1.12356	1.16488	5.92674	3.60648	0.00718175	1.41432	0	0	0	0	1.18711	0	0
GABA.CGE.VIP.CALB2	4	3.53802	0.283349	0.789963	0	0	0	0.0132816	0	1.71305	0	0	1.76473	0	0	0	0.406385	0	0	0.990034	0	1.32289	1.5077	5.83338	2.91351	0.00666284	1.64574	0	1.80401	0.00666284	0	0.589014	0	0
GABA.CGE.VIP.CALB2	4	2.59926	1.06988	0.0710686	0	0	0	0.5519	0	1.34275	0	0.286266	3.32739	0	0	0	0	0	0	0.234226	0	0.905472	0	5.7171	3.22789	0	1.30519	0	0	0	0	0.882882	0	0
GABA.CGE.VIP.CALB2	4	2.71511	1.9428	0.420504	0	0	0	0.726363	0	0.712016	0	0	3.19025	0	0	0	0.0218468	0	0.834275	1.27859	0	0.143763	1.95329	5.37877	3.55365	0.117926	1.07213	0	0.00733542	0.0981003	0	0	0	0
GABA.CGE.VIP.CALB2	4	2.77273	1.28454	0.272743	0	0	0	0.0803042	0	1.01629	0	0	2.06224	0	0	0.794097	0	0	0	0.324431	0	0.75557	0	5.58831	3.33944	0.00694389	1.53263	0	0	0	0	1.18101	0	0
GABA.CGE.VIP.CALB2	4	4.064	3.23087	0.298721	0	0	0	0.229292	0	1.65477	0	0	0.271525	0.170055	0	0.0442199	0	0.546916	0.0485362	0.473649	0	0.881758	0	5.23354	0	0	2.54664	0	3.28105	0	0	0.913086	0	0
GABA.CGE.VIP.CALB2	4	3.40362	2.62305	0.362996	0	0	0	0.0107477	0	2.36754	0	0	1.39535	0.332469	0	0.519244	0	0.251809	0	0.0160786	0	1.80301	0.547765	5.63493	0	3.02536	2.65508	0	3.1074	0	0.32469	0.758277	0	0
GABA.CGE.VIP.CALB2	4	2.95268	1.91597	0.541984	0	0	0	0.42006	0	1.96444	0.00634632	0	0.901906	1.771	0	0	0	0	0	0.0126526	0	0.599539	0	5.72021	0	0	2.3366	0	2.16226	0.0736203	0	0	0	0
GABA.CGE.VIP.CALB2	4	2.71269	2.74943	0.526622	0	0	0.00585742	0.498474	0	2.09722	0	0	1.48459	0	0	0	0	0	1.77684	0	0	1.17321	0.570739	5.87825	2.25444	0.0116807	2.36077	0	1.96062	0.00585742	0	0.985868	0.229907	0
GABA.CGE.VIP.CALB2	4	2.80518	1.11939	0.402512	0	0	0.00574598	0.212093	0	1.35764	0	0	2.00099	0	0	0.644332	0	0	0.00574598	0.129536	0	1.19369	0.367219	5.36244	2.22234	0.00574598	0.390885	0	0	0.00574598	0	1.06726	0	0
GABA.CGE.VIP.CALB2	4	3.4338	2.1552	0.449793	0	0	0	0.25422	0	0.504025	0	0	1.59246	0	0	0.980479	0	0.228479	0	0.053175	0	1.52823	1.43257	6.16255	0.197585	2.82721	2.53932	0	3.12804	0.0108636	0	0.392451	0	0
GABA.CGE.VIP.CALB2	4	2.73345	2.55545	0.405524	0	0	0.0246969	0.709766	0	2.48229	0	0	1.52074	0.71793	0	0	0	0	0	0.0165322	0	1.23123	0.745991	5.65681	0	0.00830026	2.26712	0	2.36806	0	0.00830026	0	0	0
GABA.CGE.VIP.CALB2	4	2.89249	1.89558	0.389311	0	0	0.0204829	0.421503	0	1.65148	0	0	1.61236	0	0	0	0.00687435	0	0.682855	0.0339087	0	1.7043	0	5.39688	3.6154	0.00687435	1.40015	0	0	0	0	0.966199	0	0
GABA.CGE.VIP.CALB2	4	3.27214	0.969197	0.534043	0	0	0	0.458221	0	0	0	0	0.00826941	0.415303	0.529163	0	0	0	0.66182	0	0	0.514379	0.917478	6.09613	0	4.06638	2.9911	0	3.83363	0	0	0	0	0
GABA.CGE.VIP.CALB2	4	3.61225	1.86808	0.472799	0	0	0.00590877	0.584514	0	0.844787	0	0	1.85147	0	0	0	0	0	0.805846	0	0	0.831975	2.05227	6.07253	3.1869	0	1.24622	0	2.34114	0	0	0.392061	0	0
GABA.CGE.VIP.CALB2	4	2.37892	2.14194	0.224029	0	0	0.025645	0.365756	0	2.22764	0	0.00862162	1.31109	0.457517	0	0.0171695	0	0	1.4503	0	0	0.181617	0.890922	6.10624	2.4701	0	2.49683	0	2.65053	0	0	0.637564	0	0
GABA.CGE.VIP.CALB2	4	3.39723	0.449512	0.155248	0	0.0057746	0.0341577	0.950428	0	1.43708	0	0	1.06055	0	0	0	0	0	0.272109	0.356664	0	0.821578	0.380697	5.30136	1.33579	0	1.27941	0	0	0	0	0.873677	0	0
GABA.CGE.VIP.CALB2	4	3.37545	2.72769	0.229113	0	0	0.0142033	0.362065	0	2.68616	0	0	2.14375	0	0	0	0.0142033	0	0.268155	0.0351371	0	0.420104	0.410662	5.568	0	0.00712688	2.12428	0	0.443327	0	0	0	0.0142033	0
GABA.CGE.VIP.CALB2	4	3.49141	2.82699	0.549813	0	0	0.0213277	0.472244	0	2.38164	0.00715988	0	2.06572	0.252642	0	0	0	0	0.0213277	0	0	0.899621	1.01018	5.37694	0	0.00715988	2.2253	0	0.578425	0	0.258208	0	0.0958537	0
GABA.CGE.VIP.CALB2	4	3.21045	0.0601949	0.321471	0	0	0.0204702	0.689489	0	1.87092	0	0	1.14767	0	0	0	0.00687007	0	0	0.11082	0	0.968432	0.628877	5.83325	0	0.00687007	1.89712	0	2.94586	0	0	0.0921343	0	0
GABA.CGE.VIP.CALB2	4	3.15778	2.43016	0.297354	0	0	0.00931573	0	0	2.21601	0	0	1.6012	0.600821	0	0.00931573	0	0	1.07112	1.06145	0	1.67573	0.0276908	5.35426	0.00931573	0	1.4013	0	1.18037	0	0	1.09957	0	0
GABA.CGE.VIP.CALB2	4	2.72648	0.756597	0.510006	0	0	0.0246427	0.0721778	0	1.10278	0	0	1.99066	0.404782	0	0	0	0	0.399219	0.479585	0	0.609735	1.62923	6.00277	3.75063	0	1.85717	0	0	0	0	0.905019	0	0
GABA.CGE.VIP.CALB2	4	3.28812	1.99687	0.318067	0	0	0.0151688	0	0	0.881205	0	0	1.50919	1.19401	0.00761314	0	0	0	0	0	0	1.72287	0.589136	5.81889	0.890658	0	2.18628	0	3.2801	0	0	0	0	0
GABA.CGE.VIP.CALB2	4	2.76969	2.13053	0.0827514	0	0	0.00954009	0.245286	0	2.17942	0	0	0	0	0	0	0	0	0.729288	0.738491	0	1.75497	0.351904	5.51275	0	0	2.67326	0	3.3879	0.00954009	0	0	0	0
GABA.CGE.VIP.CALB2	4	3.8505	1.2733	0.293664	0	0	0.00630109	0.578747	0	0.686159	0	0	0.542668	0.0847948	0	0	0	0	0.549989	0	0	0.509046	1.36939	6.1916	3.11846	0	2.46617	0	3.84186	0	0	1.73985	0	0
GABA.CGE.VIP.CALB2	4	3.04904	2.58859	0.166694	0	0	0.0156502	0	0	1.93711	0	0	1.5689	0.780698	0	0	0	0	0	0	0	0.758783	0.0386756	5.36303	0	1.25728	2.07789	0	3.09793	0	0	0.0078557	0.424225	0
GABA.CGE.VIP.CALB2	4	3.53002	2.65465	0.834214	0	0	0.00676355	0.429267	0	2.08244	0	0	2.22194	0	0	0	0	0	0.741656	0.0782914	0	1.0144	0	5.35366	0	0	0.764032	0	0	0	0	0.834214	0.698724	0
GABA.CGE.VIP.CALB2	4	2.85659	2.39287	0	0	0	0.00770343	0.143809	0	2.88074	0	0.00770343	1.96248	0.829181	0	0	0	0	1.13995	0	0	0.196002	0.54185	5.48918	0	0.00770343	1.66764	0	0.00770343	0	0	0	0	0
GABA.CGE.VIP.CALB2	4	3.35993	2.60069	0.556818	0	0	0.0120428	0.407329	0	2.35872	0	0	1.7944	0.296614	0.00603954	0	0	0	1.02281	0.161844	0	1.00301	0.895197	5.5312	2.042	0	1.32182	0	0	0	0	0.570608	0	0
GABA.CGE.VIP.CALB2	4	2.86515	2.19938	0.110541	0	0.00647244	0.056797	0.797852	0	2.95531	0.00647244	0	2.19866	0	0	0	0	0	1.33636	0	0	0.0444513	0	5.7464	0.426875	0	0.931748	0	0	0	0	0	0	0
GABA.CGE.VIP.CALB2	4	2.88768	2.33628	0.690272	0	0	0	0.00818342	0	2.31135	0	0	1.97004	1.08093	0	0	0.00818342	0	0	0	0	1.28226	0	5.37982	0	0.00818342	2.36448	0	2.51944	0	0	1.01466	0.702557	0
GABA.CGE.VIP.CALB2	4	2.57158	0.836144	0.040578	0	0	0.101192	0	0.00589865	1.16339	0	0	0	0	0	0	0	0	1.70298	0.0175926	0	0.739303	0	5.12986	3.09516	0.713552	0.79158	0	2.67091	0.0117627	0	0	0	0
GABA.CGE.VIP.CALB2	4	2.782	2.54259	0.0137983	0	0	0.0206267	0.986251	0	0.00692294	0	0	2.08063	0	0	0	0	0	0	0.386889	0	0.63983	0	5.55292	2.82946	0.333594	1.74829	0	2.18278	0	0	0	0	0
GABA.CGE.VIP.CALB2	4	3.04961	1.8995	0.0515114	0	0	0.0452157	0.0452157	0	1.69869	0	0	1.01915	0.164163	0	0.118268	0	0	1.56987	0	0	0.118268	1.08602	5.87653	3.12322	0.0260874	1.46563	0	2.80745	0	0	0.343359	0	0
GABA.CGE.VIP.CALB2	4	3.10192	2.36089	0.409902	0	0	0	0.600218	0	2.70734	0	0	0.473356	0	0	0	0.0130744	0	1.28435	0	0	0.709552	1.00932	5.61743	0.191087	0	2.22407	0	0	0.00655858	0	0.0195481	0.473356	0
GABA.CGE.VIP.CALB2	4	2.7543	2.34635	0.278679	0	0	0.0264296	0.991012	0	2.88962	0	0	2.63493	0.143231	0	0	0.6439	0	1.01798	0.844024	0	0.273599	0	5.70311	0.0648087	0.0133021	0.705278	0	0	0.00667317	0	0	0	0
GABA.CGE.VIP.CALB2	4	3.09464	0.418244	0.822218	0	0	0.0298015	1.37611	0	0.758174	0	0	1.72061	0.349571	0	0.005029	0.005029	0.0248958	1.089	0.588689	0	0.876128	1.371	5.80217	3.30992	0.005029	2.06584	0	0	0	0	0.236816	0	0
GABA.CGE.VIP.CALB2	4	2.23124	1.90555	0.299401	0	0	0.0130857	0.586057	0	1.84706	0	0	2.31335	0	0	0	0	0	0	0	0	1.26659	0	5.46312	4.01718	0.00656427	1.13381	0	0	0	0	0	0	0
GABA.CGE.VIP.CALB2	4	2.25968	2.72061	0.0305772	0	0	0.00516156	0.495725	0	2.47248	0	0	1.75379	0	0	0	0	0	0.00516156	0.35007	0	1.42472	0.532854	5.1247	2.0995	0	0.807358	0	0.112456	0	0	0.413642	0	0
GABA.CGE.VIP.CALB2	4	2.79235	2.87001	0.658042	0	0.00602731	0.0120185	0.30949	0	2.41039	0	0	1.14618	0	0	0.340072	0.00602731	0	0.361358	0.0238943	0	1.46999	0.773244	5.23933	0.398565	0	2.62148	0	2.5443	0	0	0.0238943	0	0
GABA.CGE.VIP.CALB2	4	3.32958	2.58278	0.503306	0	0	0.00749119	0.184836	0	2.40273	0	0	2.40613	0.45201	0	0	0.00749119	0.00749119	0.52578	0	0	0.268722	0.865433	5.60987	0	2.34605	1.79432	0	2.8235	0	0	0.00749119	0	0
GABA.CGE.VIP.CALB2	4	3.32893	2.30291	0.442362	0	0	0.0493423	0.547168	0	0.794764	0	0	0.915156	0	0	0	0	0.0100652	0.22546	1.12619	0	1.53509	1.36182	4.77215	0	0.598504	1.82449	0	3.19285	0	0.974146	1.68835	0	0
GABA.CGE.VIP.CALB2	4	2.55457	0	0.320712	0	0	0	0.543395	0	1.25541	0	0	2.04426	0	0	0	0.00685117	0	0.612798	0.81451	0	0.515049	1.85792	5.94843	3.04576	0	1.87704	0	0	0	0	0.320712	0	0
GABA.CGE.VIP.CALB2	4	3.06682	2.6246	0.286269	0	0	0.0126675	0.190904	0	2.34503	0	0	1.41665	0	0.00635381	0.00635381	0	0	0	0	0	0.0189416	0	5.34046	0	0.00635381	1.47955	0	1.7567	0	0	0	0	0
GABA.CGE.VIP.CALB2	4	2.54706	2.84721	0.273371	0	0	0.0113674	0.628379	0	2.55108	0	0	0	0	0	0	0.00569986	0	0.676015	0.0337218	0	0.915341	1.05602	5.16292	0.00569986	3.02671	2.9302	0	3.01304	0	0	1.37649	0	0
GABA.CGE.VIP.CALB2	4	3.63723	1.28213	0.207743	0	0	0.0106821	0.0212513	0	1.18685	0	0	1.81375	0.55138	0	0.0264943	0	0.673543	0.163138	0.203371	0	1.05197	0.930482	5.37	0	0	1.38402	0	2.97474	0	0	0.225042	0.0624453	0
GABA.CGE.VIP.CALB2	4	3.71796	1.68347	0.410356	0	0	0.0218191	0.0896123	0	1.58223	0	0	0.933785	0	0	0.00549956	0.00549956	0	0	0.758949	0	0.91187	1.71671	5.78542	2.83764	0	1.44128	0	2.72386	0	0	0.338309	0	0
GABA.CGE.VIP.CALB2	4	2.67405	2.45615	0.541421	0	0	0.0116144	0.110486	0	3.13105	0	0	1.07016	0	0.0116144	0.00582404	0	0	0	1.15831	0.00582404	0.765786	0.00582404	5.10193	0	0	0	0	0	0.067745	0	0	0	0
GABA.CGE.VIP.CALB2	4	3.34672	1.98006	0.456338	0	0	0.0111662	0.452774	0	0.515054	0	0.0055987	2.22071	0	0	0.0055987	0	0.197999	0.0055987	0.613982	0	0.610939	0.881628	5.93252	1.75597	0.0111662	1.71943	0	3.00352	0	0.0331314	1.33689	0.281892	0
GABA.CGE.VIP.CALB2	4	2.61576	0.590742	0.356156	0	0	0	0.14063	0	1.28573	0	0.00627191	0.930255	0	0	0	0.00627191	0	0.0125047	0.53705	0	0.522232	0	5.30813	0	0	1.51202	0	1.94172	0	0	0	1.06473	0
GABA.CGE.VIP.CALB2	4	2.98458	2.56263	0	0	0	0.00524769	0.336381	0	2.55203	0	0	1.55845	0	0.00524769	0	0	0	1.21734	0.142006	0	0.203956	1.34579	6.14067	0	0	2.1128	0	0.896973	0.00524769	0.00524769	0	0.837295	0
GABA.CGE.VIP.CALB2	4	3.213	2.88033	0.437697	0	0	0.0223163	0.0864243	0	2.9928	0	0	0.843265	0	0	0	0	0	1.07611	0	0	0.38792	0	5.70431	0	0	1.98012	0	0	0	0	0	0	0
GABA.CGE.VIP.CALB2	4	3.128	2.03034	0.368355	0	0	0.0341145	0.348144	0	2.37827	0	0	1.37512	0	0	0	0.297902	0	1.30392	0.45273	0	0.547406	1.35443	5.84091	2.8076	0	1.7439	0	0.00576718	0	0	1.34242	0	0
GABA.CGE.VIP.CALB2	4	3.56943	1.72524	0.230876	0	0	0.0109906	0.481726	0	2.29159	0	0	1.68814	0	0	0	0.0272532	0.0164409	1.81733	0	0	0.338875	1.61065	6.05487	2.63245	0.00551037	2.50011	0	1.9938	0	0	0.265365	0	0
GABA.CGE.VIP.CALB2	4	2.59835	0.468248	0.444602	0	0	0.0062015	0.0719943	0	1.31331	0	0	0.261284	0	0	0	0	0	1.7122	0.561165	0	0.0123648	0.241937	5.91595	2.97395	2.99564	2.25169	0	0	0	0	0.256483	0	0
GABA.CGE.VIP.CALB2	4	3.34271	2.41873	0.425278	0	0	0	0.508334	0	2.77126	0	0	1.20739	0.235078	0.00574451	0	0	0	0.429036	0	0	1.23792	0	5.22434	0.0171355	0	1.69304	0	0.00574451	0	0	0	0	0
GABA.CGE.VIP.CALB2	4	2.92611	1.33535	0.648182	0	0	0	0.745504	0	0.0161556	0	0	1.37112	0	0	0.81635	0	0	0.0399099	0.669253	0	0.855183	1.15765	5.62353	0	3.15145	2.92217	0	3.47138	0	0	0.630999	0	0
GABA.CGE.VIP.CALB2	4	2.84464	1.15051	0.170651	0	0	0	0	0	2.20984	0	0.0132036	0	0	0	0	0	0	0.00662361	0.13064	0	1.88741	1.55213	4.79342	0	0	2.0086	0	2.5651	0	0	1.03469	0.836893	0
GABA.CGE.VIP.CALB2	4	2.65419	1.37933	0.571567	0	0	0	0.317059	0	2.72877	0	0	1.43415	0	0.0123594	0	0	0	0	0.407905	0	1.18846	0	5.51491	0	0.00619882	2.16879	0	2.32752	0	0	0	0	0
GABA.CGE.VIP.CALB2	4	3.0392	1.47821	0.698003	0	0	0	0.0946902	0	1.8724	0	0.00824245	0	0.00824245	0.547158	0	0	0	1.2455	0	0	0.363709	0	4.85548	0	2.22927	2.33962	0	2.75991	0	0	1.64633	0	0
GABA.CGE.VIP.CALB2	4	2.44579	0.448041	0.0983945	0	0	0	0	0	1.1498	0	0	0.647052	0	0	0	0.00686955	0	0.182241	0.316439	0	2.09186	0	5.14231	0.452435	0	2.35126	0	1.82636	0	0	0.270175	0.434741	0
GABA.CGE.VIP.CALB2	4	3.00452	2.0628	0.415851	0	0	0	0.896018	0	0	0	0	0	0	0	0	0	0	0	0	0	0.726915	0.655806	6.18926	0	0	2.53002	0	2.48185	0	0	0.00744556	0	0
GABA.CGE.VIP.CALB2	4	3.58249	2.08312	0.232614	0	0	0.00593449	0	0.599602	1.62476	0	0	1.34215	0	0.011834	0.559598	0.00593449	0	0.849822	0	0	1.34059	1.46355	5.40617	0.606117	2.04304	2.9444	0	3.74567	0	0.348294	0.00593449	0	0
GABA.CGE.VIP.CALB2	4	2.58476	0.91691	0.264126	0	0	0	1.26335	0	1.01495	0	0	0.197248	0	0	0	0	0	1.30587	0	0	1.06059	0.621799	5.91715	3.10054	2.025	2.23168	0	0	0	0	0	0.00494336	0
GABA.CGE.VIP.CALB2	4	3.5065	1.7332	0.532103	0	0	0	0.275297	0	0	0	0.565661	1.90594	0.705427	0	0	0	0.0157218	0	0	0	0.775929	0.3996	5.02337	1.72759	0.00526812	2.3631	0	0	0	0	0	0	0
GABA.CGE.VIP.CALB2	4	3.13681	0.147571	0.296047	0	0	0	0.310722	0	1.61642	0	0	1.76303	0	0	0	0	0	0	0	0	1.35468	0	5.38703	2.48202	0	2.1494	0	2.13227	0	0	0.0887057	0.00660379	0
GABA.CGE.VIP.CALB2	4	3.21815	0.00722352	0.049502	0	0	0	0.271351	0	2.45466	0	0	0	0	0	0	0	0	1.12514	0	0.00722352	0.78342	0.936654	5.30743	0	0	2.76665	0	2.49494	0	0	0	0	0
GABA.CGE.VIP.CALB2	4	2.69923	0.993071	0.801177	0	0	0.0197204	0.687717	0	1.70373	0	0	1.74978	0	0.00661678	0	0.00661678	0.00661678	0.0131901	0.0704826	0	1.73349	0	6.08849	0	0	2.71693	0	2.05302	0	0	1.18695	0	0
GABA.CGE.VIP.CALB2	4	2.85479	0.382641	0.390182	0	0	0	0.888611	0	1.3771	0	0	2.12792	0	0	0	0	0.00553408	0.0165112	0.209512	0	1.46805	0	6.05304	3.4721	0.00553408	1.2032	0.00553408	0	0.00553408	0	0.546371	0	0
GABA.CGE.VIP.CALB2	4	2.54403	0.833251	0.232179	0	0	0	0.972779	0	1.84684	0	0	1.85151	0	0	0	0.00592209	0.0350176	0.986161	0.255451	0	0.183944	1.2961	6.27924	0.454983	0.250839	2.2006	0	2.5547	0	0	0.0688504	0	0
GABA.CGE.VIP.CALB2	4	3.04715	1.4468	0.47681	0	0	0	0.555374	0	1.20391	0	0.521564	1.89715	0.306109	0	0	0.0052528	0	0.0052528	0.94574	0	1.17505	0	5.35029	3.25974	0.0052528	1.05968	0	0.0052528	0	0	0	0	0
GABA.CGE.VIP.CALB2	4	3.22083	1.32434	0.625124	0	0	0	0	0	1.16308	0	0	1.63195	0.681599	0	0	0	0.0225974	0.0056974	0	0	0.737791	0	6.3441	1.27449	3.5788	2.89407	0	2.96576	0.0056974	0	0.618989	0	0
GABA.CGE.VIP.CALB2	4	2.6803	1.42799	0.325303	0	0	0	0.292577	0	0	0	0.275803	2.66102	2.13344	0	0	0	0	0.592167	0.292577	0	0.168786	1.64026	5.44346	3.98461	1.59268	2.60744	0	0	0.043609	0	0.0220422	0	0
GABA.CGE.VIP.CALB2	4	2.77057	0.678021	0.352401	0	0	0	0.273611	0	1.2808	0	0	0.968455	0.302696	0	0	0	0	2.02703	0	0.00430174	0.958585	1.9274	5.68517	3.79039	2.77569	2.11087	0	0	0	0	0.0586029	0	0
GABA.CGE.VIP.CALB2	4	3.09227	0	0.209298	0	0	0	0.227554	0	1.57544	0	0	1.69386	0	0	0.071221	0.00566229	0	0.195384	0.342767	0	0.800441	0.546286	5.76517	0.597562	0	1.83388	0	1.81926	0	0	0.185999	0	0
GABA.CGE.VIP.CALB2	4	3.49931	2.5623	0.184975	0	0	0.0655345	0.388053	0	1.21507	0	0	2.03307	0	0	0.151587	0	0.00562827	0.295868	0	0	0.988647	0	5.9465	3.01576	1.36846	2.42585	0	3.12715	0	0	0.0495491	0	0
GABA.CGE.VIP.CALB2	4	3.13819	1.22904	0.582182	0	0	0	0.632423	0	0.419552	0	0	2.29515	0.584419	0	0	0	0.0119577	0.26601	0.0918827	0	1.30904	1.90241	5.05204	4.26109	0	2.23092	0	0	0.00400182	0	0.357012	0	0
GABA.CGE.VIP.CALB2	4	3.05957	0.47956	0.291723	0	0	0.00562967	0	0	3.09444	0	0	0.451203	0	0	0	0	0	0.0112278	0	0	1.35126	0	5.70517	0	0	2.4814	0	3.00319	0	0.244225	0.640612	0	0
GABA.CGE.VIP.CALB2	4	2.81123	2.08028	0.225795	0	0	0	0	0	1.54471	0	0	0.524663	0.199654	0	0	0.00537528	0	0.718329	0.221485	0	1.40285	0.726181	4.94546	0	1.40814	2.27757	0	3.21393	0	0	0	0	0
GABA.CGE.VIP.CALB2	4	3.66806	2.10117	0.491919	0	0	0	0.479892	0	1.80238	0	0	2.32711	0.62074	0	0	0	0	0.874633	0	0	0.449175	2.27924	6.09412	3.47335	0.350922	1.49532	0	2.24876	0	0	0.771665	0.0193637	0
GABA.CGE.VIP.CALB2	4	3.4804	2.27578	0.252099	0	0	0	0	0.670771	0.337481	0	0	0	0	0	0	0	0.494909	0.841105	0.0999648	0	0.916499	0	5.20741	0	2.21975	2.57877	0	3.2125	0	0.0557608	1.49188	0	0
GABA.CGE.VIP.CALB2	4	3.19805	1.62166	0.211685	0	0	0.0521954	0.436015	0.0106593	0.890351	0.00534385	0	1.82153	0	0	0	0	0	0	1.28799	0	1.46001	0	5.45252	1.40895	0.00534385	1.06729	0	0	0	0	1.1298	0	0
GABA.CGE.VIP.CALB2	4	2.47426	1.14024	0.659055	0	0	0.0086815	0.239252	0	0.603405	0	0	1.91924	0	0	0.0426729	0.0258216	0	0.508422	0.153293	0	1.16229	0.793889	5.60534	2.30329	0.115175	1.66744	0	0	0.204329	0	0.460075	0	0
GABA.CGE.VIP.CALB2	4	3.17233	2.4075	0.453067	0	0.323594	0.0420866	0.225646	0	2.9211	0	0.663146	1.38375	0.865213	4.40605	0.354222	0	0.796561	0.210284	0	0	0.957342	0.732077	5.08693	2.22237	0	1.565	0	2.06946	0	0.330482	0.0142266	0	0
GABA.CGE.VIP.CALB2	4	3.91329	2.06051	0.254414	0	0	0	0.652649	0	1.12892	0	0	2.2236	0	0	0	0	0	0.882255	0.0254257	0	0.833109	0	5.1319	2.09596	1.75164	2.45406	0	4.00712	0	0	0	0	0
GABA.CGE.VIP.CALB2	4	3.08514	1.89711	0.591619	0	0	0	0.886139	0	2.13563	0	0	0	0	0	0	0.00604867	0.255584	0	0.738149	0	1.3017	0.431758	4.76369	0	0.00604867	2.27526	0	2.24936	0	0	0	0	0
GABA.CGE.VIP.CALB2	4	2.7453	0.0545675	0.0426961	0	0	0	0.155508	0	2.42872	0	0	1.13542	0	0	0	0	0.760978	0	0.00621219	0.00621219	1.34588	0	4.42005	1.27706	0.00621219	2.09235	0	3.32151	0	0	0.340072	0	0
GABA.CGE.VIP.CALB2	4	3.27218	2.40497	0.196297	0	0	0	0.248387	0	2.16327	0	0	1.3718	0	0	0	0	0.00720362	0	0.115918	0	0.581114	0	4.23967	0	0	1.4942	0	2.30484	0	0	0.00720362	0	0
GABA.CGE.VIP.CALB2	4	3.3578	1.06839	0.769181	0	0	0	0.598216	0	1.77017	0	0	1.86036	0	0	0.0562858	0	0.565865	0.0484363	0.0794711	0	0.938063	0.532433	5.3048	2.71433	2.30582	2.10568	0	3.46758	0	0	0.386263	0	0
GABA.CGE.VIP.CALB2	4	2.05933	1.11867	0.0513314	0	0	0	0.106095	0	1.77804	0	0	2.28602	0	0	0	0	0.207371	0	0	0	0.970554	0	4.24793	3.12007	0	1.51774	0	0	0	0	0	0	0
GABA.CGE.VIP.CALB2	4	3.71572	2.38888	0.809986	0	0	0	0.282789	0.433231	2.03346	0	0.00370704	1.40672	0	0	0	0	0	0	0.0785397	0	0.827997	0.873982	5.2235	2.94529	0	2.09656	0	3.72651	0	0	0.75741	0	0
GABA.CGE.VIP.CALB2	4	3.19872	1.94161	0.199909	0	0	0	0.303113	0	2.27609	0	0	1.59617	0	0	0	0	0.529627	0	0.0242906	0	1.35374	0.526727	4.99985	0	0.080288	1.8654	0	2.42458	0	0.262344	0.25093	0	0
GABA.CGE.VIP.CALB2	4	3.70418	2.66085	0.476302	0	0	0	0	0	2.04701	0	0	1.29242	0.149203	0	0	0.0133199	0	0	0.0458635	0	0.974298	0.679126	4.97784	0	0	1.87248	0	1.33917	0	0	0	0	0
GABA.CGE.VIP.CALB2	4	3.13214	2.05013	0.203647	0	0	0	0.778745	0	2.41962	0	0	2.02901	0	0	0	0.00703351	0	0	0	0	0.745813	0	4.72289	1.72187	0	1.44617	0	3.20373	0	0	0.977838	0.209389	0
GABA.CGE.VIP.CALB2	4	3.29651	2.49461	0.41092	0	0	0	0	0	0.762422	0	0	2.21567	0.480638	0	0.78337	0	0.508312	0.329469	0.855346	0	0.159076	0.626585	4.53088	0	2.03497	2.67815	0	2.67503	0.309691	0	1.04459	0	0
GABA.CGE.VIP.CALB2	4	4.00802	2.01552	0.286982	0	0	0	0	0	1.81945	0	0	2.95579	0	0	0.0991956	0.00649649	0	0	0.513612	0	0.856825	0.548108	5.71223	0.84849	2.00767	2.17863	0	3.79736	0.362336	0	0	0	0
GABA.CGE.VIP.CALB2	4	2.89308	0.778003	0.752291	0	0	0	0.904225	0	1.01027	0	0.24398	2.99544	0.248301	0	0.195179	0	0.0379552	0.775461	0.162836	0	0.932896	1.2725	5.23818	3.90062	0	2.15419	0	0	0	0	0.825105	0	0
GABA.CGE.VIP.CALB2	4	2.9249	2.98276	0.332588	0	0	0	0.15221	0	2.96087	0	0	2.79707	0.116274	0	0	0	0	0	0	0	1.29163	0	5.03211	0	0	1.83565	0	0.1869	0	0	0	0	0
GABA.CGE.VIP.CALB2	4	3.74392	1.75458	0.521173	0	0	0	0.388396	0	1.05935	0	0	1.43096	0	0	0	0	0.118346	1.5592	0.671007	0	1.09733	1.58528	5.46609	3.40353	3.18434	2.81899	0	0	0	0	1.23427	0	0
GABA.CGE.VIP.CALB2	4	3.2288	2.4569	0.369442	0	0	0	0.57578	0	2.17634	0	0	1.80177	0	0	0.128359	0	0.0829634	0.486824	0.521651	0	1.20248	0.898582	5.16371	3.16211	0	1.73919	0	0	0	0	0.603757	0	0
GABA.CGE.VIP.CALB2	4	3.75445	2.99189	0.439573	0	0	0	0.299656	0	2.82509	0	0	1.79464	0.166942	0	0	0.364808	0	0	0.105986	0	0.393504	1.06013	4.95756	1.69713	0	1.16788	0	0	0	0	0.251928	0	0
GABA.CGE.VIP.CALB2	4	2.95572	1.96422	0.312735	0	0	0	0.23882	0	2.2682	0	0	1.56684	0	0	0	0	0	0	1.34739	0	0.875969	0	3.38426	1.80997	0	0.256369	0	0	0	0	0	0	0
GABA.CGE.VIP.CALB2	4	3.90131	2.96657	0.788066	0	0	0	0.861339	0	2.6094	0	0	2.31056	0	0	0	0	0	0.257753	0	0	0.694709	0.694709	4.7148	1.22835	0	1.49235	0	0	0	0	0.188588	0	0
GABA.CGE.VIP.CALB2	4	3.04815	2.65322	0.435954	0	0	0	0.4939	0	3.02946	0	0	2.16085	0.580943	0	0	0	0	0	0	0	0.66467	0.519552	5.32332	2.16249	0	1.55751	0	0	0	0	0.266321	0	0
GABA.CGE.VIP.CALB2	4	3.19896	2.5995	0.534891	0	0	0	0.421826	0	2.93686	0	0	1.98745	0	0	0	0	0	0.460952	0	0	0.875183	0.868824	5.35094	1.19753	0	2.42925	0	3.87022	0	0	0	0	0
GABA.CGE.VIP.CALB2	4	3.24769	2.79038	0.699585	0	0	0.383561	1.3198	0	2.04537	0	0	2.87782	0	0	0	0	0.737563	0	0	0	0.846888	0.989836	4.81606	0.558473	0	2.47855	0	1.25974	0	0	0	0	0
GABA.CGE.VIP.CALB2	4	2.79599	1.94335	0.4098	0	0	0	0	0	1.9077	0	0.754506	2.53002	0	0	0	0	0	0	0.594526	0	1.11014	0	4.76672	4.01942	0	0.579963	0	0	0	0	0	0	0
GABA.CGE.VIP.CALB2	4	3.02383	2.55452	0.108036	0	0	0	0.713932	0	2.97106	0	0	1.44817	0	0	0	0	0	0	0	0	0.789242	0	5.17529	1.90955	0	1.33673	0	0.333257	0	0	0	0	0
GABA.CGE.VIP.CALB2	4	3.67955	2.84685	0.466129	0	0	0	0.406312	0	2.24216	0	0.00768228	3.26438	0	0	0	0	0.593186	0	0	0	0.390781	0.150099	4.96197	0	0.00768228	1.85724	0	2.36097	0	0	0	0	0
GABA.CGE.VIP.CALB2	4	3.47775	2.69932	0.42123	0	0	0	0.122003	0	2.86101	0	0	1.9958	0.0873794	0	0	0	0	0.275496	0.00956575	0	0.564927	1.37634	5.33884	2.06213	0	1.40387	0	0	0	0.311332	0.648728	0	0
GABA.CGE.VIP.CALB2	4	3.55973	2.81939	0.300276	0	0	0	0.21322	0	3.09309	0	0	1.95004	0	0	0	0	0	0.677724	0.0185886	0	0.833283	0.446525	4.95304	2.03854	0	1.62239	0	0.00623466	0	0	0.267316	0	0
GABA.CGE.VIP.CALB2	4	3.50183	2.46541	0.317556	0	0	0	0.569207	0	2.53979	0	0	1.78	0	0	0	0	0	0.00642357	0.520631	0.00642357	1.19994	1.36425	4.62124	0	0.00642357	2.48815	0	3.90326	0	0	0	0	0.00642357
GABA.CGE.VIP.CALB2	4	3.31992	1.49381	0.144091	0	0	0	0.118199	0	1.37053	0	0	0	0	0	0	0	0	1.07877	0.440532	0	1.48549	0.822779	5.14115	0.891666	0.00735335	1.8131	0	2.89185	0	0	0.00735335	0	0
GABA.CGE.VIP.CALB2	4	3.8427	1.4992	0.4205	0	0	0	0.552259	0	1.2622	0	0	2.19293	0	0	0.0648657	0	0	0	0.731864	0	1.35627	0	5.10021	2.56566	0	1.04719	0	0.744676	0	0	0.672089	0.00667921	0
GABA.CGE.VIP.CALB2	4	3.96352	3.09216	0.696151	0	0	0	0.8036	0	2.51298	0	0	2.77299	0	0	0	0	0.621812	0.438844	0.0236704	0	0.710966	0	4.63545	0	0	1.97875	0	2.20915	0	0.403476	0.647211	0	0
GABA.CGE.VIP.CALB2	4	3.48673	2.2127	0.332882	0	0	0	0	0	0.296847	0	0.421723	1.53365	0	0	0	0	0	0.00615264	0.0828718	0	1.29914	0.429787	4.84073	0	0	1.48453	0	0.425763	0	0	0	0	0
GABA.CGE.VIP.CALB2	4	2.92482	1.67923	0.491271	0	0	0	0	0	2.61457	0	0	1.44566	0	0	0	0	0.634196	0	0.658433	0	1.88363	0.980309	5.32009	1.81395	1.44722	2.72224	0	3.76768	0	0	0	0	0
GABA.CGE.VIP.CALB2	4	3.76383	0.204578	0.166875	0	0	0	0	0	1.04451	0	0	1.99731	0	0	0	0	0	0	0.499922	0	1.24821	1.11287	4.64747	3.25071	0	1.33209	0	0.0128884	0	0.430699	1.51322	0	0
GABA.CGE.VIP.CALB2	4	3.40178	2.10318	0.145575	0	0	0	0.173219	0	2.48009	0	0	1.11625	0	0	0	0	0	0	0.953225	0	1.1303	0.727507	5.18639	1.97829	0	2.89992	0	3.76589	0	0	0.810144	0	0
GABA.CGE.VIP.CALB2	4	3.13092	1.11159	0.72253	0	0	0	0.676625	0	1.48036	0	0	2.4128	0	0	0	0	0	0.567541	0.542789	0	0.277901	1.50117	5.49318	3.25834	0	2.13905	0	1.95997	0	0	1.20629	0	0
GABA.CGE.VIP.CALB2	4	3.27129	2.82359	0.349316	0	0	0	0	0	2.02475	0	0	2.40687	0	0	0.0213952	0	0	1.1828	0.701317	0	1.03552	0	5.65235	2.55173	2.49806	2.63627	0	4.11976	0	0.323571	0.0143142	0	0
GABA.CGE.VIP.CALB2	4	2.27385	1.70887	0.324606	0	0	0	0.188105	0	1.71436	0	0.35494	2.71575	0	0	0	0.00606863	0	0	0	0	1.58088	0	3.74394	4.12937	0.00606863	0.10397	0	0.00606863	0	0	0	0	0
GABA.CGE.VIP.CALB2	4	3.55873	2.65759	0.542114	0	0	0	0.103667	0	2.36443	0	0	2.03976	0	0	0	0	0.511767	0	0.186987	0	1.18226	0	4.8501	0	2.35289	2.466	0	2.71238	0	0.0127688	1.17236	0	0
GABA.CGE.VIP.CALB2	4	3.16874	2.85363	0.148284	0	0	0	0	0	2.05753	0	0	2.22122	0	0	0	0	0.0132323	0	0	0	0.444333	0	4.89263	0	0	1.68065	0	1.38888	0	0	0	0	0
GABA.CGE.VIP.CALB2	4	3.40185	2.62135	0.275019	0	0	0	0.197794	0	2.55876	0	0	2.0404	0.211862	0	0	0	0	0	0.0283715	0	0.386592	0.00573905	5.08125	0.752516	0	1.45545	0	0	0	0.321987	0.625451	0	0
GABA.CGE.VIP.CALB2	4	3.18843	2.72202	0.0955813	0	0	0	0.0548838	0	2.76675	0.00624908	0	2.26703	0.892731	0	0.00624908	0	0	0	0	0	0.910542	0	5.00139	0.564465	0.0308621	2.06629	0	0.0124593	0	0	0.823651	0	0
GABA.CGE.VIP.CALB2	4	3.17977	2.77655	0.830089	0	0	0	0	0	2.59335	0	0	1.61738	0	0	0	0	0	0	0.153298	0	0.0497195	0	5.15873	3.35909	0.0189357	1.70913	0	0.00635181	0	0	0	0	0
GABA.CGE.VIP.CALB2	4	3.38957	2.84476	0.205494	0	0	0	0.352095	0	2.54095	0	0	2.30427	0	0	0	0	0.311162	0.599536	0	0.00568709	0.993097	1.2473	5.10531	0.753089	0.011342	2.07847	0	0	0	0.186744	0	0	0
GABA.CGE.VIP.CALB2	4	2.76795	3.03732	0.276295	0	0	0	0.128638	0	2.58062	0	0	1.62917	0.353692	0	0	0	0	0	0.0185468	0	0.657391	1.02411	5.21439	0.358063	0.00622056	2.25051	0	0	0	0	0	0	0
GABA.CGE.VIP.CALB2	4	3.03928	2.94384	0.195261	0	0	0	0.526281	0	2.82756	0	0	1.5486	0	0	0	0	0	1.20965	0.611347	0	1.64517	0	5.16519	2.07429	0	1.55828	0	0	0	0	0	0	0
[truncated: 25,896 more rows]
