# Supplementary material for: Activity-dependent tuning of intrinsic excitability in mouse and human neurogliaform cells
Source: eLife journal article supplement (doi:10.7554/elife.57571), 2020-06-04
Supplement: supp [file elife-57571-supp-v1.zip › elife_poa_e57571_Figure_6_source_data_1.xlsx]

## Sheet: Figure 6B
CGE NGFC Cluster IKA mrNA expression Levels					no of cells	3626
	KCNA4	KCNC3	KCNC4	KCND1	KCND2	KCND3			KCNA4	KCNC3	KCNC4	KCND1	KCND2	KCND3
	0.560856	0.060795	0.481793	0	0.682789	0.172308		MEDIAN	0.00492647	0.0233104	0.286972	0	0.339732	0.34302
	0.477882	0.0404724	0.321074	0	0.913799	0.833358
	0.094697	0.0416871	0.181197	0	1.19352	0.00706965
	0	0	0	0.653548	1.54742	1.15748
	0.181417	0.08725	0	0	1.4679	0.961718
	0	0.00781702	0.501596	0	0.302431	0.457884
	0.745072	0.067282	0.256429	0	0.625919	0.267143
	0.843958	0.0430362	0.11276	0	0.802594	0.0842965
	0.355874	0.0583699	0.0832572	0.267898	0	0
	0.019011	0.153869	0.821157	0	0.315586	0.792608
	0	0.0873723	0.796323	0	1.24933	0.0225691
	0	0.0898356	0	0	1.95005	0
	0.369372	0.161726	0	0	1.44632	0
	0.785704	0	0.303921	0	1.49027	0.799387
	0.920901	0	0.274292	0	0.381919	0
	0.0693833	0	0.550682	0	0.464201	1.47267
	0	0	0	0	0.907147	0
	0	0.0653707	0.0295824	0	0.0149006	1.39809
	0.115014	0	0.412381	0	0.544482	0.604517
	0.716592	0	0.137158	0	0.206772	0.874047
	0.156257	0.208182	0	0	0.439472	0.932142
	0.0812099	0.065487	0.322586	0.31644	0	0.859524
	0.188731	0.00939733	0.063999	0.124147	0.679295	0.405736
	0.0717394	0	0.433001	0	0	0
	0.0642245	0.0754711	0.317631	0	1.16535	0.263524
	0	0.0603725	0.483858	0.222286	0.222286	0.0381577
	0.0227852	0	0.497928	0	1.09105	0.00917647
	0.42388	0	0.359552	0	0	0.500187
	0	0	0.159078	0	1.30677	0.00715889
	0	0	0.685177	0	0.884392	1.26419
	0.5169	0.0424711	0.0751953	0	1.15897	0.577145
	0.223926	0	0.862456	0	0.167656	0.0662077
	0	0	0.0246706	0	1.32276	0
	0.167329	0.046819	0.0649496	0.558326	0.274865	0.800686
	0.0271619	0.152897	0.243214	0	1.5628	0.0271619
	0	0	1.01106	0	0	1.0644
	0	0.128399	0	0	0	0
	0.553307	0	0.144185	0	1.11005	0
	0.433411	0	0.0541492	0	0.0865614	0.811795
	0.400031	0	0.744102	0	0	0.456262
	0.643551	0.0413405	0.85468	0	0.0167418	1.11832
	0.359323	0.0926342	0.169993	0	0.747532	0.430642
	0.128524	0.0830719	0.0492932	0.122156	0.560019	0.236713
	0.0660434	0.04451	0.293688	0	0.270807	0.712591
	0	0.0280374	0.341855	0	0.632047	0.307606
	0.240266	0.0768487	0.564659	0	0.113166	0.754379
	0	0.015411	0	0	0.642254	0.735787
	0	0	0.43799	0	1.13585	0.0414069
	0	0.0169074	0	0	0.355068	0.777729
	0.804664	0	0.355216	0	0.857729	0.00866618
	0	0.309708	0.657654	0	0.729458	0.0371179
	0.745081	0.00533171	0.792171	0	0.893393	0.0211584
	0	0.0251978	0	0	1.19676	1.05625
	0	0.0565416	0.437265	0	0	0.431883
	0.147392	0	0.86168	0	0	0.704037
	0.0478752	0.0344288	0.384841	0	0.721665	0
	0.938015	0.0334222	0	0	0	0.659922
	0	0	0.779001	0	0.491645	0.858968
	0.34028	0.0228981	0.43458	0.169995	0.208333	0.0671791
	0.43513	0	0.615232	0	0	0
	0.688993	0	0.0376362	0.575504	0.229138	0.0890579
	0.0796291	0.188315	0.0985837	0	0.779837	0.760654
	0.418248	0.0385866	0.314667	0	0.166334	0.218262
	0.555426	0.0129454	0	0	1.38059	1.0451
	0.206977	0	0.211419	0	0	0.848409
	0.807333	0.171546	0	0.49346	0.0168695	0
	0.671019	0.0267656	0.346202	0	0.731551	0.25063
	0.756869	0.0911519	0.186068	0.00679368	1.54061	0.882898
	0.00497936	0	0.712111	0.332429	0	0.0439461
	0.452278	0.027648	0.419649	0	0.553938	0.0166804
	0.468128	0.0458861	0.352484	0.194458	0.205442	0.484789
	0	0.0519766	0.720357	0.241128	0.789985	0
	0.273221	0.106731	0.623533	0.0742404	0.188539	0.682158
	0.407317	0.0948109	0	0.334902	0.952127	0.0109895
	0.535495	0.00712902	0.321495	0	1.08046	1.52266
	0	0.0373086	0.349351	0	0.401573	0.512245
	0.0175823	0.0685473	0.460804	0	0.787231	0.0433895
	0.456735	0.0168834	0.305691	0	0.372397	0
	0	0	0	0	0.00494849	0.485541
	0.0967823	0.117074	0	0	0.802332	0.122084
	0	0.00483646	0.576926	0	0	0.652926
	0	0	0.0962387	0	0.640438	0.562294
	0	0.0823718	0.0936043	0	1.1751	0.861885
	0.0116584	0.0458397	0.257093	0	0.314365	0.283934
	0.400297	0	0	0	1.20856	0
	0	0	0.523936	0.287416	0.228968	0.0869228
	0.0630297	0.148152	0.00589698	0	1.20837	0
	0.227784	0	0.344864	0	0.900165	0
	0.706985	0.00628614	0.325456	0.20971	0.0787902	0.0846014
	0.296556	0	0.339719	0	0.431395	1.00287
	0	0	0.369435	0	0.582606	0.641194
	0.570092	0	0.486662	0	0.419179	0.0963181
	0.921071	0.00497762	0.295882	0	0.851141	0.269555
	0.0964181	0.0125731	0.215431	0	0.146828	0.950839
	0	0.00584311	0	0	0.799661	0.511664
	0.729276	0	0.140351	0	0.41114	0.554363
	0.79281	0.161029	0.0066975	0	0.998275	1.26227
	0.144417	0.07824	0.212485	0.169709	0.320138	0.725308
	0.446753	0	0	0	0.91792	0
	0	0.101999	0	0	0.223591	0.0739024
	0	0.0169927	0.395801	0	0.511852	0.0169927
	0	0.00747079	0.106593	0	0	0.0998297
	0	0.124779	0.270099	0	0.918757	0.766296
	0	0.053069	0.00543545	0.376943	0.0268865	0.516309
	0.409316	0.0235229	0.0578013	0	0.296488	0.405357
	0.0207972	0.0758551	0.320829	0	0.186393	0.529892
	0.0758338	0	0.813274	0	0.511045	0.763132
	0	0.0142697	0.289191	0	0	0.472266
	0	0.0861465	0.329198	0	0.546516	1.31613
	0	0.0658753	0.301449	0	0.587842	0.011285
	0.0106451	0.0264033	0	0	0.20273	1.21028
	0.884524	0.0220581	0.446707	0	0	1.20985
	0.729601	0	0.471116	0	0	0.0342214
	0	0.0804607	0	0	0.664025	0.693247
	0	0.0959989	0.67665	0	0.391096	0
	0.743776	0	0.117943	0	0.884802	0.743776
	1.19919	0	0.329435	0	1.03704	0.0175801
	0.43901	0.0779369	0.0779369	0	0.121941	0.489944
	0.0611769	0.0310562	0.194329	0	0.761681	0.297864
	0	0.0056046	0.0167204	0	0.707307	0.438766
	0.437024	0	0.00587617	0	0.311444	0.585349
	0.552426	0.0110286	0.638014	0	0.20032	0.908449
	0.965645	0.195134	0.424129	0.00692673	0.552034	0.760772
	0.152153	0.0346096	0.505223	0.0843766	0.443132	0.0789677
	0.231047	0.0809328	0.351706	0.351706	0.659747	0.093807
	0.0060706	0.0121046	0.0299911	0	0.306937	0.359298
	0.129863	0	0.055179	0	0.113117	0.395653
	0	0.182722	0.769004	0	0.240291	0.416979
	0.191258	0.00600401	0.393234	0.0809429	0.405353	1.52632
	0	0	0.519429	0	0	1.14277
	0.21763	0.0406711	0.255081	0	0.342997	0.617297
	0.18815	0.127384	0.377966	0	0.606787	0.624265
	0	0.0545384	0.441427	0.0545384	0.0755473	0.741289
	0.0993953	0	1.03985	0	0.00521154	0.40654
	0	0.0385064	1.27599	0	0.594056	0.377068
	0	0	0.888375	0	0	0.75961
	0	0.0486301	0	0	1.28837	0.0687688
	0.406376	0.0117278	0.552335	0	0	0.276507
	0	0.100952	0.348758	0	1.06362	0.502298
	0.548714	0.00989678	0.599132	0	0	0.548714
	0.680551	0.0160657	0.209624	0	0.36275	0.784807
	0.425967	0.137928	0.334057	0	0.42816	0.117218
	0.994922	0.00963815	0.801985	0	0.0144226	0.0968452
	0.493939	0	0.228534	0	1.42008	0.858207
	0.379248	0.0907087	0.704009	0	0.26462	0.41272
	0.126512	0.0148737	0.0343673	0	0.130904	0.943288
	0.311123	0	0	0	0.407495	0.545216
	0.112876	0.164871	0.46842	0	0	0.0720262
	0.00576867	0	0.29582	0	0.422955	0.745689
	0.706293	0.00741063	0	0	0.800788	1.41322
	0.766058	0	0	0	1.0138	1.64668
	0	0.0285624	0.099218	0.114838	0.179839	1.20109
	0.372699	0.101894	0	0	0.628644	0.937088
	0.329998	0.0417663	0.445691	0	0.839438	0.916245
	0.116012	0	0	0	0.437893	0.258682
	0	0	0.294561	0	1.51077	0.799014
	0.0184589	0.0425525	0.705407	0	0.0305783	0.708469
	0.399868	0.0159042	0.274052	0	0.716562	0.261789
	0.0214549	0.0320122	0.514193	0.159985	0.481235	0.329564
	0.987626	0.0668681	0.342625	0	0.717786	0.432212
	0.479312	0.0951881	0.956706	0	0.394445	0.82986
	0.449127	0.236745	0.697391	0.232433	0	0.800459
	0.291699	0.0909912	0	0	0.501344	0.0465301
	0	0.0199373	0.243111	0.26909	0.58711	0.166561
	0.57211	0.0386873	0.49272	0	0.568925	0.677642
	0.0674787	0.0126124	1.07474	0	0.349843	0.694491
	0	0	0.833011	0.119284	1.00075	0.719557
	0.656803	0.0302856	0	0	0.408316	0.926299
	0.192836	0.0754386	0.5138	0	0.272641	0.310275
	0	0.0351495	0.184588	0	0.793162	0.760256
	0.72674	0.18795	0	0	1.13765	0.79904
	0.467759	0.088603	0.125028	0	0.145261	0.95925
	0.242098	0.0270235	0.742488	0	0.254917	0.0216769
	0.735131	0	0.567198	0.123639	1.25479	1.23776
	0.053138	0.0239661	0.783228	0	0.818614	0.45108
	1.1037	0	0.031988	0	0.929894	0.0568615
	0.396382	0.0716849	0.466582	0	0.958563	0.190156
	0.0106576	0.026434	0.34157	0.349155	0.32235	0.220288
	0.287108	0.0224218	0.185712	0	0.216616	0.661263
	0.496811	0.105594	0.579854	0.0887508	0.329156	0.42664
	0.741451	0	0.861562	0	0.741451	0.340214
	0.525354	0	0	0	0.0941482	0.0575456
	0.914232	0.429006	0.137057	0	0.22361	0.0587269
	0.0187835	0	0.361933	0	0.759712	0
	0.099824	0.0573716	0	0	0.898757	0.76767
	0	0.195516	0.892469	0	0.352407	1.12479
	0.0966929	0	0.506753	0	0.785217	0.502923
	0	0	0.287046	0	0.281226	0.884894
	0	0.0525086	0.562333	0	1.28252	0.709663
	0.760732	0.126946	0.345851	0	0.633067	0.716487
	0.850844	0.121151	0.522899	0	1.42958	0.436565
	0.0877085	0.174776	0.345371	0	0.689686	0.763547
	0.0219324	0.0849831	0.30365	0	0	0.0219324
	0.0792494	0.0404095	0.468714	0	0.656398	0.22108
	0.103251	0.0230403	0.0891376	0	0.209513	0.424162
	0	0.380738	0.290956	0	0.185811	0.0972149
	0.371704	0.177173	0	0.0124281	0.545418	0.323114
	0.0230769	0.00775163	0.588631	0.222356	0.414488	0.4695
	0	0.107352	0.144168	0	1.08194	0
	0	0.236282	0.595989	0	0.758309	0.718277
	0.823094	0	0.659375	0	1.26045	0.535886
	0.0260654	0	0.576072	0	0	0.805035
	0.442267	0.00738905	0.293531	0	0	0
	0.171761	0.00746779	0.334524	0	1.27286	0
	0.0594221	0.0990118	0.414936	0.131741	0.65465	0.685968
	0	0.00881672	0.0684486	0	0.0348099	0
	0.721525	0	0	0	0.514285	0.218754
	0	0.0985849	0	0	1.18132	0.286341
	0.0924551	0.0564922	0.197164	0	0.732384	0.168934
	0.0151252	0.00759121	0.600467	0	0.98448	0.803997
	0.768707	0.0497117	0.564987	0	0.0924327	0.499134
	0.385198	0.286454	0.249454	0	0.233168	0
	0.0228041	0	0.379341	0	0.406589	0.109151
	1.02036	0.117733	0.559422	0	0.117733	0.00622774
	0.420148	0.108162	0.614403	0	1.19089	1.09008
	0.168749	0.269128	0.0777775	0	0.0709516	1.46916
	0.08699	0.0112967	0.147601	0	0.998965	0.204747
	0.341617	0.0204091	0.53124	0	0.233403	0.200204
	1.13897	0.363821	0.00780547	0	0.336213	0.905501
	0.200679	0	0.169907	0	0.0800464	0.287694
	0	0	0	0	0.993089	1.11932
	0.439527	0.0701117	0.50591	0	0.910857	0.0655875
	0.0557684	0.198017	0.260202	0	0.916931	0.252131
	0.198708	0.00534729	0.278916	0	1.12503	1.27506
	0.316014	0	0.0933106	0.0992323	0.31125	0.552033
	0	0.14794	0.615382	0	0.0372598	0.241637
	0.127454	0	0.0687822	0	0.8774	0.704449
	0	0	0.0605706	0	0.374406	1.37991
	0.0108918	0.00546071	0.292289	0	0.344067	0.540759
	0.890998	0.168022	0.833057	0	0.68647	0.597074
	0.198184	0	0	0.00752976	0	0.729123
	0.235743	0	0.311552	0	0	0.0141415
	0.00771447	0	0.665162	0	1.06647	0.00771447
	0.526659	0.036985	0.481135	0	0.0585367	0.866678
	0.0465805	0.0420189	0.244167	0	0.150246	0.823249
	0	0.0751346	1.00893	0	0.670829	0
	0.0144064	0	0.649286	0	0.919929	0.498181
	0	0.0979384	0.552978	0	1.05018	0.477052
	0.346899	0.016027	0.172682	0	0	0.788884
	0.56626	0.120411	0.372188	0	0.372188	0.397074
	0.236003	0.0723913	0.773385	0	0.834469	0.782789
	0	0.0981622	0.89964	0	0.402836	0.787733
	0.153652	0.206268	0.269464	0	0.423233	0.638386
	0.0561055	0.0561055	0.523368	0	0.58417	0.54869
	0.468988	0	0.510882	0	1.18247	0.152949
	1.38093	0	0.382639	0	1.59146	0.960028
	0.0182483	0.0361696	0.482426	0	0.523263	0.548407
	0.423123	0.0376876	0.207373	0	1.04311	0.87738
	0	0	0.0223689	0.191553	0	0.513475
	1.10719	0	0.45741	0	1.15721	0.482932
	0	0.259612	0	0	0.831904	0
	0.0578981	0.206943	0.293126	0	0.127729	0.112627
	0	0.164868	0.851979	0	0	0
	0.904956	0	0.309626	0	0.430257	1.13255
	0.651842	0.155985	0.304816	0	0.413883	0.981829
	0.0149997	0.0657945	0	0	0.775297	1.43421
	1.14122	0.0079185	0	0	1.09709	1.14122
	0.0137255	0.121322	0.296768	0	0.00459614	0.388313
	0	0.0375867	0.458003	0.049808	0.903507	0.314995
	0	0.119073	0.462783	0.0928262	0.356269	0.447356
	0.267582	0.162665	0	0	0.278197	0.365759
	0	0.0792845	0.769883	0	0.255389	0.755706
	0.887472	0	0.523347	0	0.214286	0.322382
	0.807954	0.00512451	0.638666	0	0.0694582	0.207985
	0	0.0247648	0.140148	0.475018	0.398066	0
	1.16398	0.0380244	0	0	1.11012	0.588325
	0.126819	0.283954	0.461163	0	0.21887	0.608148
	0.962995	0.269117	0	0	0.550591	0
	0	0.25856	0.512565	0	0.9446	0.966424
	0.480884	0.165796	0.589619	0	0.078783	0
	0	0.0104111	0.265052	0	0.240671	0.265052
	0.447896	0.0582705	0.314818	0	0.0392218	0.451086
	0	0.102267	0.215278	0	0.937294	0.498393
	0.0152664	0.12062	0.0788534	0	0.343752	0.495295
	0	0.105446	0.00462287	0	1.162	0.614074
	0.808979	0.0154502	0.930689	0	0.990269	0.135685
	0.370754	0.024629	0.529554	0	0.541232	0.735803
	0.254368	0	0	0	0	0.303482
	1.07639	0.122745	0.510077	0	0.374303	0
	0.353152	0.108381	0.730462	0.0113822	0.569263	0
	0	0	0	0	0.815458	0.858829
	0	0.00584529	0.737359	0.136766	0.400414	0
	0.172617	0.0826215	0.02656	0	1.62328	0.56476
	0	0.0408313	0.237377	0	0.669163	0.381441
	0	0.0342839	0.385846	0	0.138224	0.352697
	0	0	0	0	0.874349	0
	0.41482	0.173614	0.0972087	0	0.751109	0.457252
	0.0747319	0.155398	0.974143	0	0.648016	0
	0	0.120156	0	0.265423	0.0416768	0.682502
	0	0	0.104216	0	0.333198	1.14599
	0.265102	0.010595	0.902014	0	0.513443	0.688424
	0	0.138192	0.652242	0	0.0546893	0
	0	0.0453113	0.957429	0	0.0833414	0.527861
	0.427534	0.00526799	0.381723	0	0.500577	0.35985
	0.355556	0.101422	0.744368	0	0.689183	0
	0	0	0.52319	0	1.17374	0.134841
	0.322532	0.0615057	0.00702379	0	1.34009	0.0139986
	0.00829043	0	0.757147	0	0.860897	0.0799648
	0	0	0	0.720078	1.54661	0.124809
	0.054049	0.0347311	0.272332	0	0.92413	0.118866
	0.52438	0	0.869471	0	0.203148	0.338417
	0.050048	0	0.587314	0.123959	0.6581	0.724205
	0.944986	0.00554213	0.584851	0	1.17547	0
	0	0.0817779	0.00997535	0.293311	0	0.640412
	0.691039	0	0.488644	0	1.06525	0.0705862
	0	0.0325928	0.326793	0.260954	0.0272339	0.162707
	0.111622	0	0.59043	0	0.441773	0.103768
	0.567612	0.0477412	0.59832	0	0.48832	0.37316
	0	0	0.666116	0	0.474183	1.08032
	0.407457	0.0160953	0.12682	0	0	0
	0.650019	0.0941629	0.2525	0.165112	1.06573	0.752374
	0.107407	0.00594999	0.774577	0	0.673355	0
	0.617699	0	0.414592	0	0.00478994	0.665715
	0.278424	0	0.491414	0	1.41425	0.79615
	0	0.0244368	0.9297	0	0.372574	0
	0.643186	0.392209	0.498256	0	0.532867	0.322725
	0	0.0163243	0.300927	0	0.703303	0.321026
	0.315132	0.0272696	0.162907	0	0.75514	0.294754
	0.0558328	0	0.280389	0	0.010386	0.202503
	0.132685	0.0279828	0.800175	0	0.378247	0.374352
	0.32445	0.0843855	0.262672	0	0.715995	0.196825
	1.1015	0.00585614	0.898771	0	0.821765	0.385171
	0.00609626	0.0241652	0.615169	0	0.0535729	0.0821405
	0.00554398	0.130137	0.947349	0	0.26679	0.896495
	0	0.238016	0	0	1.13861	0.635758
	0	0	0.337626	0	0	0.251038
	1.09677	0	0.153755	0	0.0264543	0.636579
	1.03269	0.509831	0.457022	0	0.867268	0.0150008
	0.113839	0.127776	0.500797	0	0.484785	0.109149
	0.591247	0	0.820196	0	0.246816	0.588142
	0	0.162147	0.621954	0	0.348269	0.637583
	0	0.335879	0.483001	0	1.09934	0.883467
	0	0	0.801673	0	0.528234	0.0811677
	0	0.0402804	0.559033	0.140379	0.410076	0.477459
	0	0.038817	0	0	0.499639	0.337008
	0.381454	0.122449	0.231528	0	0.455958	0
	0.0404569	0.0404569	0	0	0.717194	1.69422
	0.662927	0.038126	0.0676136	0	0	0.288343
	0	0	0.19203	0	0.0075325	0.625675
	0.201553	0.277681	0.0436916	0	0.887531	0.577485
	0.0054555	0	0.646102	0.0737947	0.332084	0.457338
	0	0.305222	0	0	1.04801	0.269863
	0.183856	0.136081	1.23516	0.233899	0.483874	0.322995
	0	0.0839407	0.635158	0	0.399018	0.0999153
	0	0	0.122176	0	0	0.926453
	0.320917	0.070056	0	0	0.760973	0.672402
	0	0.0584957	0.0108933	0	0.850885	0.810317
	0.347872	0	0.545472	0.497991	0.795771	0.143828
	0	0.102971	0.747497	0	0	0
	0	0	0.923003	0	0.578038	0.393653
	0.184964	0.117039	0.0602306	0	0.101863	0.198938
	0	0	0.00653212	0	0	0.0817602
	0.38071	0.00577483	0.0671897	0	1.0941	0.0886192
	0.206002	0	0.145159	0	0.759965	0
	0.438184	0.298817	0	0	0.532178	0.66001
	0.517837	0	0.094433	0	0.469481	0.00493955
	0	0.0839497	0.189388	0	0.585845	0.321712
	0.321561	0	0.481243	0	0.883265	0
	0.119862	0	0.486182	0	0.041571	0.342563
	0	0	0.200238	0	0.978373	0.867823
	0	0.00545769	0.478054	0	0.474655	0.193453
	0	0	0.494695	0	0	0.251906
	0.237117	0	0.346426	0	0.866401	0.0347317
	0	0	0.526359	0	1.60315	0.00585366
	0	0	0.566884	0	1.28714	0.433165
	0.230244	0.0116998	0	0	0.506236	0.7223
	0	0.00896699	0	0	0.232073	0.0903678
	0	0	0.651419	0	0.184657	1.06807
	0	0.0529579	0.333274	0	0.969453	0.496362
	0	0.0680478	1.03701	0	0.136158	0.617916
	0.27405	0.00499197	0.0488325	0	0.751886	0.779806
	0.402941	0.0233546	0.396604	0.0989124	0.758098	0.568487
	0.0170019	0.00427764	0.740709	0	0.906103	0.509497
	0.0633683	0.140603	0.252188	0	0.345463	0.596208
	0	0	0.661072	0	0	0.40524
	0.553024	0	0.644801	0	0.754534	0.420604
	0.443188	0.0424597	0.752136	0	0.725498	0.159987
	0.381958	0.0738758	0.294514	0	0.388911	0.628114
	0.347305	0.123218	0.0583649	0.335655	0.539854	0.0737087
	0	0.0521949	0.1529	0.201515	1.02141	0
	0	0.0487882	0.859109	0	0.258072	0.0645359
	0.00627742	0.157024	0.32051	0	0.635465	0.315929
	0.220508	0.037659	0.255084	0	0	0.921538
	0.249979	0.180873	0.4867	0	0.407925	0.211696
	0.725607	0.0769137	0.0263007	0	0.69416	0.880635
	0	0.0270072	0.0747021	0.391411	0	0
	0	0.142675	0.516933	0	0.54492	1.00401
	0	0	0	0	0.341236	0.102962
	0	0.0272621	0	0	0	0
	0	0.0503432	0.485063	0	0.214615	0.22965
	0	0	0.62769	0	0.528251	1.11594
	0	0	0	0	0.725272	0
	0.100421	0.0139865	0.179975	0	0.041386	1.39856
	0	0	0.32308	0	0.00644318	0.450331
	0	0	0.541709	0	1.01855	0.85582
	0.00570401	0	0.28221	0	0.0928027	0.0447462
	0	0.383945	0.0949357	0	0	0
	0.709918	0.369433	0.296102	0	0	0.852765
	0.00535136	0.0159689	0.275035	0.203234	1.71091	0.463877
	0	0.0272559	0.222084	0	1.50916	1.01826
	0.435329	0.0202488	0	0	0.531977	0.704463
	0.226189	0	0	0	0.103258	0
	0.0606831	0.0557645	0	0	0.501799	0.412722
	0	0	0	0	0.961124	0.637716
	0	0	0.878366	0	0	0.898708
	0	0.0106992	0	0	0.380171	0
	0	0.0430848	0.0392438	0	0.256327	0.437176
	0.057703	0.00455884	0.516559	0	0.906591	0
	0	0.0507004	0.418761	0	0.871303	0.165229
	0.028924	0	0.141172	0.226606	0.316066	0.106605
	0	0	0.0353624	0	0.877054	0.417017
	0.304466	0.128934	0.283244	0.531987	0	0.401133
	0.815316	0.272912	0.848423	0	0.862569	0
	0.00444037	0.0176444	0.568401	0	0.422079	0.583412
	0	0	0	0	0.00475408	0
	0.661429	0	0	0.0254771	0.613695	0.65698
	0.051499	0.0284186	0.567524	0	0.271769	0.50283
	0	0	0.332951	0	0.99476	1.12342
	0	0	1.06766	0.427825	0	0.338207
	0.0877404	0.00960684	0	0.118219	0.670728	1.35745
	0.505909	0.0914672	0.361168	0	1.09576	1.11295
	0.0473942	0	0.612654	0	1.02086	0.19422
	0.690701	0	0.7582	0.0197068	0	0.862165
	0	0.00467725	0.84044	0	0	0.481712
	0	0	0.421433	0	0	1.11966
	0.0170603	0	1.2676	0	0.683491	0.639085
	0	0.153883	0	0.324903	0.742176	0.878638
	0	0	0.276661	0	0.83604	0.504354
	0	0.0977239	0.93395	0	0.647064	0.337401
	0.416521	0	0.29482	0.0323504	1.00548	0.284272
	0.354748	0.140468	0.458101	0.017587	0.460902	0.181991
	0	0.0649368	0	0	0.388524	0.26185
	0.464953	0.193007	0.193007	0	0.149253	0.838844
	0.0324871	0.081497	0.399173	0	0.0460934	0.192499
	0.37574	0	0.581958	0	0.24265	0
	0	0.0146146	0	0	0.671376	0
	0	0	0.696972	0	0.807719	1.05813
	0	0	1.13805	0	0	0
	0.24878	0.256616	0.571952	0	0.434859	0.876391
	0	0.196019	0.773973	0	0.10053	0.404511
	0	0.0281804	0.53077	0.086643	0.8677	0.182379
	0.109157	0.190375	0.304905	0	0.857742	0.0708277
	0.0104408	0.0104408	1.0126	0.228839	1.04818	0.249496
	0	0	0.518469	0	0	0.634946
	0.0700058	0.0458535	0	0	1.28149	0.370103
	0	0.0995401	0	0	0.00435147	0.352776
	0.312151	0.0717782	0.610572	0	0.133752	0.613676
	0	0	0.702	0	0.328071	0
	0	0.0459982	1.00283	0	0.0258153	0.345851
	0.100318	0.0142869	0.647801	0	0.314321	0.460693
	0.450601	0.0152681	0.453864	0	0.856075	0.236398
	0.462414	0	0.333059	0	0.0049282	0.216786
	1.05488	0.0224329	0.15713	0	0.532554	0.0112793
	0.375237	0.144199	0.869627	0	0.428787	0.0488253
	0.506682	0.104326	0.410733	0	0.558926	0.493983
	0.481284	0.443388	0.460792	0	0.574809	0.481284
	0.645887	0	0	0	1.1135	0.662938
	0.248841	0	0.537415	0	0.59098	0.64457
	0	0.101585	0.787746	0.197459	0.291618	0.416601
	0.0787044	0.177707	0.449848	0	0.485119	0.361173
	0.00533776	0	0.842408	0	0	0
	0	0.267106	0.279158	0	0.377935	0.797254
	0	0.0920965	0.286898	0	0.334042	0.0264447
	0.229407	0.048397	0	0.248926	0.283129	0.777129
	0.225167	0	0.885155	0	0.766613	0.435921
	0.378262	0.0435301	0.0482519	0	0	0
	0	0	0.0665101	0	0.349191	0.20926
	0.418648	0.00967094	0	0	0.213568	0.604795
	0.419649	0	0.369935	0	0.00490706	0.96256
	0	0.0426618	0	0	0.621658	0.725328
	0.0101499	0	0.643348	0.185676	0.418895	0.408779
	0.498239	0	0.697947	0.280899	0.935417	0.0468292
	0	0.0318547	0.635409	0	0.237589	0.241228
	0	0.485867	0.0404815	0	0.0290816	0.390717
	0.0679802	0.0472285	0.08831	0	0.540363	0.580524
	0.196025	0.0232661	0.0726224	0.0232661	0.531486	0
	0	0.0524893	0.398449	0	0.389363	0.134277
	0.399202	0	0	0	0.875142	0.546308
	0.300316	0	1.17557	0	0.658049	0.781394
	0	0	0.1122	0	0.574381	0.15305
	0.0411633	0.0411633	0.0237289	0	0.447438	0.0469079
	0.328729	0.114497	0.241334	0	0.48036	0
	0.426664	0.00525486	0.543377	0	0.109671	0.32161
	0.476429	0	0.106543	0	0.418251	1.13096
	0.330556	0.0498342	1.0924	0.157279	0.284645	0.734475
	0.590875	0.0946159	0.61641	0.375226	0.603724	0.902272
	0.0122778	0	1.33936	0	0.346309	0.732813
	0.412887	0.0531534	0.614454	0	0.567742	0.791169
	0	0.0361018	0.395583	0	0.534045	0.612756
	0.644898	0.0279128	0.596203	0	0.988439	0
	0.0905723	0	0.93003	0	0.304172	0.469021
	0.0702917	0.0239838	0	0	0.18758	0.379258
	0.516559	0	0.520322	0	0.653748	0.783069
	0	0	0.567401	0	0.98739	0.692634
	0.115936	0	0.243354	0	0.730754	0.578954
	0.0785901	0	0.374474	0	0.873164	0
	0.545287	0.0205055	0.389672	0	0.320698	0.476953
	0.405308	0.0816411	0	0	0.843223	0.42982
	0.17583	0	0.356858	0.200334	0.102954	0.292751
	0.754595	0.0904006	0	0	0	0.790347
	0.141917	0.408637	0.463038	0	0.0052442	1.22463
	0.364815	0	0.645539	0.110371	0.830393	0.514995
	0.108446	0	0.706307	0	0.574013	0.430143
	0.0663406	0.00526233	0.0955355	0	0.55008	0.204472
	0.710801	0.00478308	0.442226	0	0	0.469577
	0.585681	0.0113103	0.735374	0	0.58251	0.563268
	0	0.117137	0.330189	0	0.409656	0.180584
	0.222569	0	0.390835	0	0.567079	0.777115
	0	0	0	0	0.928138	0.0535338
	0.25966	0.0048487	0.743521	0	1.01328	0.152941
	0.354184	0.279469	0.715616	0	0.0336251	0.0241328
	0.663319	0.291258	0.768241	0	0	0.700287
	0.78978	0.0238677	0.905612	0	0	0.261995
	0	0	0.526657	0	0.941067	0.480362
	0.527491	0.0385678	0.312617	0	0.12702	0.0552429
	0	0	0.068165	0	0	0.268011
	0.250454	0.0971536	0.563703	0	0.44371	0.566754
	0.409246	0	0.892795	0	0.382284	0
	0.451428	0	0.61519	0	0	0.232689
	0	0.318867	0.797775	0	0.0982886	1.07482
	0	0.0352068	0.905962	0	0.815058	0.516246
	0.454904	0.451089	0.503211	0	0.836403	0.0295599
	0.765487	0.196734	0.616546	0	1.14053	0.307823
	0	0.351983	0.549059	0	0.0570827	0.533519
	0	0	0.657561	0	0.616324	0.182735
	0.281574	0.197767	0.511175	0	0.511175	0.351033
	0.047592	0.374959	0.0979441	0	0.415089	0.422216
	0.592145	0	1.01106	0	1.02307	0.0272907
	0.389012	0.00557878	0.330459	0	0.510264	0.314248
	0.13254	0.144481	0.216968	0.249552	0.772791	0.43736
	0.387143	0	0	0	0.936448	0.656606
	0	0.0698448	0.826566	0	0.618947	0.360503
	0.299108	0.090052	0.0047005	0.0232846	0.148586	0.429909
	0	0	0.6339	0	0.244158	0.244158
	0	0.0189879	0.717605	0	1.77944	0.587963
	0	0.0426432	0.351455	0	0.770917	0.739066
	0.394825	0.185726	0.00473509	0	0.486439	1.00865
	0	0	0.454463	0	0	0.26567
	0.0390418	0	0.345765	0	0.276504	0.90749
	1.07041	0.0267849	0.394211	0.368253	0.758343	0.298235
	0.11258	0.147456	0.89803	0	0.2946	0.536495
	0.441143	0.0755812	1.1267	0	0.916898	0.56005
	0	0.300145	1.27416	0	0	0
	0.415354	0	0.253751	0	0	0
	0.0124994	0.00418385	0.0248445	0	0.821784	0.429608
	0	0	0.0683392	0	0	0.105391
	0.303005	0.0146391	0.376481	0	0.879946	0.227621
	0.0659844	0.181807	0.0708842	0.104527	0.675713	0.257605
	0.00478235	0.159204	0.267584	0	0.679628	0.226396
	0.0184144	0.0930999	0.669102	0	0.14265	0.00463549
	0	0.0414198	0.404182	0	0.560652	0
	1.08135	0.148784	0.637508	0	0	1.31312
	0.285683	0.0771116	0.645447	0	0.785005	0.207394
	0	0.0138131	0.828069	0	0.728026	0.913443
	0	0	0.0349936	0	0.271259	0.314435
	0	0.0376288	0.65746	0	0.0915435	0.282121
	0	0	0	0	0.448638	1.43629
	0	0	1.09466	0	0.56797	0
	0.0761629	0.0275482	0.17858	0	0.362967	0.791043
	0.656404	0.131851	0	0	0	0.306175
	0.484262	0.0822533	0	0	0.494771	0.678853
	0	0	1.17149	0	1.3485	0.438911
	0.617054	0	0.106175	0	1.03636	0.517265
	0	0.148104	1.03474	0	0.524224	0.216237
	0	0.101491	0.420589	0	0.0386002	0.53555
	0.00433155	0.0341382	0.859956	0	0.345283	0.0951663
	0.632765	0	0.342956	0	1.04793	0
	0.681078	0.0789868	0.268662	0	0	0.393977
	0	0.0459453	0	0.292347	0.307826	0.892759
	0	0.0570407	0.245938	0.066239	0.687178	0
	0	0	0.871999	0	1.11711	0
	0	0	0.70551	0	0.873626	0.126806
	0	0	0.114209	0	0	0.205818
	0	0.121643	0.00496271	0	0.139111	0
	0	0.0047932	0.405258	0	0	0.0190365
	0.191878	0.163709	0.260866	0	0.902692	0.0829908
	0	0	0	0	0.258333	0.939784
	0	0	0.499224	0	0.0150605	0.0347946
	0.154907	0	1.09537	0	0	0.801416
	0.378683	0	0.645958	0.273135	0.046241	0.609208
	0	0	0.00385679	0	0.186317	1.12459
	0.813087	0.00400112	0.138316	0	0.612981	0.165863
	0	0	0.931295	0	0.28243	0.289858
	0	0.0397599	0.384101	0	0.810936	0.535307
	0.288387	0	0	0	1.24794	0.403219
	0.00439522	0.0763016	0.180837	0	0	0.801537
	0	0.0269184	0.33194	0.600164	0.703692	0.46772
	0	0.00421206	0.588886	0	0.812538	0.384258
	0.251382	0.0988746	0.580473	0	0.648715	0
	0.366825	0	0.743527	0	0.119216	0.0223576
	0	0	0.837977	0	0	0.00443654
	0.305066	0.0563483	0.71461	0	1.02693	0.419824
	0	0.0172734	0.908659	0	0.0215456	0.779526
	0.237037	0.00430504	0.887085	0	0.411507	0
	0	0	0.562734	0.303985	0.0652748	0.0309925
	0.572868	0	0.736922	0	0.014486	0.708591
	0	0	0.344898	0	0.472526	0
	0	0.0635513	0.99141	0.151893	0.245969	0.504491
	0.0151183	0.0781118	1.13863	0	0.456703	0.269829
	0.337937	0.0106643	0.547575	0	0	0
	0	0.405624	0.648094	0	0.446459	0.307151
	0.03247	0	0.483386	0	0.402155	0.49351
	0.0512956	0.119736	0.668752	0	0	0.237091
	0	0.0982963	0.401453	0	0.523011	0.0222059
	0.668175	0.10361	0.279869	0	0	0
	0.82033	0	0.422925	0	1.31719	1.00242
	0	0	0.286414	0	0.164652	0.776529
	0	0.220901	0.804689	0	0.304516	0.200882
	0	0	0.363828	0	0.10142	0.55801
	0.202853	0	0.950537	0	0.109445	0.567943
	0	0.0305938	0.4308	0	0.375448	0.0795912
	0.571409	0.0944895	0.251756	0	0.473496	0.301842
	0.127261	0	0	0	0.735106	0.0236671
	0.134997	0	0.649103	0.239345	0	0
	0.597825	0	0	0	0.338243	0
	0	0	0.105817	0	1.11638	0.626273
	0.0872781	0.0872781	0.199507	0	0.643117	0.764165
	0.0103628	0.0943628	1.11582	0	0.482298	0.355633
	0	0	0	0	0.391132	0.557848
	0.768581	0	0.6807	0	0	0.605199
	0	0	0.0821925	0	0	0.732701
	0.815707	0.00521779	0.315855	0	1.05712	1.07335
	0.0057197	0.0393674	0.772155	0.312699	0.123924	0
	0	0	0.954908	0	0.393437	0.242175
	0	0.117201	0.472479	0	0	0
	0	0.0712777	0	0	0.59771	0
	0.56162	0	0.692093	0	0.869128	0.226788
	0	0.00968576	0.886185	0	0	0.888189
	0.00474354	0	0.124988	0	0.860622	0.366168
	0.695923	0.102321	0.963391	0	0	0.296885
	0.146156	0.134261	0.284004	0.225677	0.400558	0.231123
	0.107429	0.365831	0.378175	0	0.639409	0.123385
	0	0.123284	0.42874	0	0.648775	0.320542
	0	0.00462051	1.00506	0.308392	0.532945	0.022892
	0.00653769	0.0448909	0.308037	0	0.359701	0.258634
	0	0.169606	0.48112	0	1.06694	1.24155
	0	0.0825837	0	0	0.727534	0.935941
	0	0	0.566581	0	0.177131	0
	0	0.0117032	0.753407	0	0	0.499234
	0.193353	0.269064	0	0	0.557664	0.869836
	0.548337	0	0.332749	0	0.652946	0.135194
	0.283613	0.46172	0.154296	0	0	0.044996
	0	0	0	0	0	0.497302
	0	0.0925001	0	0	0.119735	0.374512
	0.00552848	0	0	0	0.382318	0.419444
	0	0	0.531821	0	0.596875	0
	0	0	0.806526	0.422802	0.916766	0.524376
	0.053947	0	0.561802	0	0.363174	0.476057
	0	0	0	0	1.11859	0.561197
	0.71443	0.081183	0	0	0	0.964597
	0	0	0.683801	0	0.0444906	0.731831
	0.00571028	0	0.388868	0	0.148718	0.897948
	0.0444517	0.0100503	0.249067	0	0.586663	0.504746
	0.495573	0	0.0540233	0	0.468919	0.0828212
	0.0687678	0	0	0	0.701134	1.05215
	0.164695	0	0.726696	0	0.96895	0.169744
	0.0243784	0	0.60589	0	1.17352	1.20729
	0	0	0.349302	0	0	1.01939
	0	0.205887	0	0	0.518269	0.538094
	0	0	0.394048	0	0.339026	0.895646
	0.377862	0.018951	0.761519	0	0.546389	0
	0	0	0.51284	0	0.722257	0.398718
	0	0	0.361423	0	0.322272	0.342039
	0.0954348	0.0404055	0	0	0.235126	0.132229
	0.177931	0.153669	0	0	0	0.187474
	0.332025	0.101138	0.892865	0.0467816	0.550639	0.231708
	0	0.258734	0.492258	0.107573	0.467661	0.209307
	0	0.0688974	0.591411	0	0.437392	0.706064
	0	0	0.230206	0	1.07314	0.693982
	0	0	0.409134	0	0.136428	0.850115
	0.125111	0.255246	0.357753	0	0.982821	0
	0.201791	0	0.0793952	0	0.879463	0
	0.592281	0.05651	0	0	0.536069	0
	0.0427745	0.0108664	0.37015	0.021616	0.564934	0.165746
	0.402755	0.230936	0.212011	0.39642	0.735414	0
	0.0574421	0	0.583478	0	0.320918	0.367022
	0.378014	0	0.289601	0	0.571307	0.0147101
	0.477383	0.016853	0.430614	0	0.373784	0.253812
	0.319947	0.0219373	0.542812	0	0.100165	0.278847
	0.524845	0.174289	0.128261	0	0.0293159	0.753557
	0	0.0587964	0.221336	0	0.539822	0.143365
	0	0	0.15462	0.198415	0	0.272715
	0.526505	0.0600366	0.730748	0	0.402129	0.264815
	0.260762	0	0.714279	0	0.811087	0.0484597
	0.184692	0.319702	0.541545	0	0.0672359	0.104466
	0	0.321107	0.156095	0	0.413856	0.0455502
	0.385276	0.155177	0.164713	0	1.17674	0.2201
	0.14352	0.108243	0.246923	0	0.0927347	0
	0.224708	0.0737031	0.114649	0	0.590762	0.62023
	0	0.0253253	0.579334	0	0.858399	0.351106
	0	0.005158	0	0	0.83204	0.860875
	0	0.028835	0.555649	0	0	0.166683
	0	0.0990732	0.1549	0	0	0.465736
	0	0.0246613	0.0780214	0	0.145009	0.00622258
	0.583855	0.017996	0	0	0.240891	0.899658
	0.313753	0	0.00503596	0	0	0
	0.0504609	0.0984973	0	0	0.470233	0.832504
	0	0.0514192	0	0.589556	0	0.932906
	0.666614	0	0.244205	0	0.987773	0.339799
	0.621024	0	0.05072	0	0.658442	0.675436
	0	0.0519433	0	0	0.455899	0.790299
	0.663741	0.0515708	0.0615734	0	1.56639	0.650021
	0	0	0.711703	0	0.112482	0.671969
	0	0.362317	0.548543	0	0	0.58395
	0.116844	0	0.34018	0	0.70081	0
	0	0	0	0	0.00568023	0.990221
	0	0	0.854612	0	0	1.07839
	0	0.0492204	0.0100398	0	0.260567	0.6514
	0.401357	0	0.341967	0	0.02271	0.247938
	0.41133	0.00534174	0.469926	0	1.16189	0.449635
	0	0.2214	0.355921	0	0.231282	0.694987
	0.0864797	0.00529942	0.40511	0.192717	0.248121	0.304542
	0	0.0492291	0.58908	0.68001	0.212824	0.476593
	0.461344	0.0333503	0.258915	0	0.6824	0.408025
	0.385361	0.0153804	0.954135	0	0.808753	1.0544
	0.0346116	0	0.584955	0	0	0.271497
	0	0.0751974	0.853766	0.491758	0.644967	0.746203
	0	0	0.747502	0	0	0.0100558
	0	0.0319237	0.815576	0	0.471523	0.0138066
	0.0610263	0.101194	0.526027	0.122832	1.04869	0.448743
	0	0.0978676	0	0	0.500655	0.586596
	0.189416	0	1.09619	0	0	0.0397495
	0.430201	0	0.447112	0	0.653453	0.283512
	0	0.126755	0.506502	0	0.0423354	0.557307
	0	0	0.295815	0	0	1.08356
	0	0.225898	0	0	0	0.749705
	0.345667	0.217949	0.364228	0	0.0261257	0
	0	0.244562	1.19555	0	0.705375	0.385591
	0.151041	0	1.22703	0	0.285952	0.843339
	0.375842	0	0.382281	0	0.866284	0.372607
	0.322895	0.362171	0.132241	0	0	0.604238
	0.585547	0.0288786	0.622906	0	0.715407	0.360894
	0.534699	0.0320375	0.625786	0	0.736354	0.0184326
	0.102686	0.19156	0.352258	0.288729	0.936116	0.509411
	0.0483391	0	0	0	1.60283	0.0196169
	0.279857	0.0699894	0.52592	0	0.259729	0
	0.107036	0.235722	0	0	0	0.0132036
	0.473656	0.0598783	0.116373	0	0	0
	0.014572	0.0888943	0.881305	0	0.873165	0.569954
	0	0	0.351617	0	0.282587	0.457029
	0.624479	0.0106502	0.0419366	0	0.980186	0.0106502
	0.258289	0	0.373102	0	0.110529	0.00506839
	0.293149	0.252923	0.186944	0	0.763263	0
	0	0	1.24101	0	0	0
	0	0.0590412	0	0	0.192987	0.757923
	0.307331	0	0	0	0.17841	0.17841
	0	0	0.149836	0	0	0.851944
	0	0.184776	0.00482048	0	0.04719	0.445023
	0.327901	0.0368654	0.339854	0.0528237	0	0.048858
	0	0.00454967	0.259593	0	0	0
	0	0.080603	0.505331	0	0.147173	1.00945
	0	0	0.833509	0	0	0.568444
	0	0.0263258	0.49211	0	0.0728604	0.456138
	0	0	0.226388	0	0.848087	0
	0	0	0.127928	0	0.380509	1.04464
	0.120269	0.110366	0.54691	0.0110518	0.26667	0.304257
	0.391054	0	0.946259	0	0	0.0307319
	0.388599	0	0.557931	0	0.838407	0.036672
	0.415735	0.0221649	0.264337	0	0.408313	0.622121
	0.675542	0.0626663	0.531473	0.423515	0.38025	0.599293
	0	0.162579	0.36383	0	0.540143	0
	0.477659	0.0183844	0.384241	0	0.460246	0.181872
	0	0	0.617991	0	0	0
	0	0.0666026	0.66967	0	0.379055	0.554852
	0	0.0353984	0.730359	0	0.503034	0.692453
	0.765614	0.0210784	0.416455	0	0	0.964809
	0	0.398248	0	0	0	0.541826
	0	0.102896	0.326292	0	1.00101	0.963674
	0.26348	0.0192618	0	0	1.19091	0.61828
	0	0.422553	0.672221	0	0.2026	0.752789
	0	0	0.329485	0	0	0.222952
	0	0.142795	0.673162	0	0.546962	0.219608
	0	0	0.123629	0	0	0
	0.626341	0.0306245	0.342682	0	0.963767	0.734288
	0.379951	0	0	0	0.441922	0.555411
	0	0.0162789	0.343804	0	0.51782	0.553047
	0	0	0	0	0.469357	0.304531
	0	0.0337746	0.952282	0	0.495444	1.18218
	0.0052177	0.0258205	0	0	0.424199	0.676915
	0	0.00492311	0	0	0.656393	0.60653
	0.108288	0	0.151333	0	1.26199	1.3448
	0.913458	0.0586533	0.0985374	0	0.0463711	0.852807
	0.898807	0.0958654	0	0	0.441827	0.51762
	0	0.166356	0.748836	0	0.386306	0.298398
	0	0	0.141473	0	1.00628	0.84312
	0	0	0.293625	0	0.878706	0.795619
	0	0	0.0722914	0	0.250666	0.364515
	0.318386	0.13328	0.13328	0	0.263119	0.275222
	0	0.030121	0.252659	0	0.484779	0.0181812
	0.575923	0.037285	0	0	0.129017	0.239545
	0.0339252	0.0713378	0.0940293	0	0.363764	0.175846
	0.601192	0.104275	0.186334	0	0.202783	0.690216
	0	0.0296461	0.421617	0	0.627332	0.696075
	0.0860794	0	0	0	0.577775	0.317039
	0	0.0444523	0.602378	0.0082306	0	0.388802
	0.577694	0	0.746071	0	0.634967	0.354855
	0.00997257	0	0	0	0.470846	1.02389
	0.0924293	0.102762	0.428819	0	0	0.550899
	0	0.0411718	0.371379	0	0.468027	0.374274
	0.421645	0.251181	0	0	1.16583	0.0891444
	0.247189	0.0893594	0.665992	0	0.39927	0.551644
	0	0.126542	0.196223	0	0.370218	0.00480618
	0	0	0.663052	0	0	0.76928
	0.285361	0.00522826	0.734809	0	0	0.316399
	0	0.343445	0.060726	0	1.00855	0.976918
	0	0.181114	0	0	0.381788	1.28377
	0.184621	0.0100871	0	0	0	0.105728
	0.0290267	0.0194445	0.609431	0	0.966864	0.663959
	0.431999	0	0	0	0.480059	0.0094349
	0.0645458	0.190247	0.0235332	0	0.402324	0.681228
	0.0511381	0.0676191	0.00870669	0	0.204867	0.62365
	0.0492042	0.0150171	0.899172	0	0.0822611	0.664301
	0.130183	0	0.865413	0	0.00478293	0.138566
	0	0	0.600168	0	0	0.127688
	0.168392	0	0.15387	0	0.0127142	0.803176
	0	0.00433602	0	0	0.641593	0.860553
	0.746389	0	0	0	1.15978	0.00588356
	0	0	0.960266	0	0.228071	1.0503
	0	0	0.0825556	0	0	0.252208
	0.015617	0.015617	0.177411	0	0.532412	0.846992
	0	0	0	0	0.980023	0.00514008
	0	0	0	0	0.258506	0.746807
	0	0	0	0	0.771876	1.00903
	0	0	0.123015	0	0	0
	0.0368436	0.0212194	0.0623534	0	0.686386	0
	0.479961	0.409188	0.518756	0.588884	1.16756	0.294812
	0.102811	0.0369712	0.0460043	0	0.477491	0.429637
	0	0.0397854	0.407652	0	0.696426	0
	0	0	0.394194	0.0957328	1.08245	0.0512866
	0	0.0434155	0.393759	0.209411	0.901895	0.2139
	0.393765	0	0.250112	0	1.18253	0.713032
	0.303881	0	0	0.127316	0.575547	0.437175
	0	0.109228	0	0	0.757308	0.829087
	0.810156	0.0793005	0.429469	0	0.731426	0.0404361
	0.0263584	0.166887	0.0918058	0	0	0.754766
	0	0.225044	0.321044	0	0.0863015	0.706822
	0	0.0798051	0.57596	0.140262	0.103492	0
	0.143323	0.0378021	0.0691041	0	0.301759	0
	0.735337	0.100389	0.170637	0	0.174867	0.320015
	0	0.148118	0.0933539	0	0.0203907	0.484369
	0	0.0929842	0.405067	0	0.114939	0.855283
	0.391339	0.0436808	0.357851	0.22122	0.743861	0.0552699
	0.258723	0.0208718	0.246436	0	0.221398	0.336994
	0.00882765	0.0391248	0.938487	0	0.88322	0.388231
	0	0.00986037	0	0	0	0.392443
	0	0	0.34933	0	1.23023	0
	0	0.421358	0.0515328	0	0.937214	0.523241
	0.467721	0.00475947	0.531399	0	0.108406	0.302354
	0.30547	0.0587027	0.427322	0.171325	0.423731	0.671089
	0.531748	0.00593073	0.283041	0	0	0.107076
	0	0	0	0	0.042273	0
	0	0	0.397692	0	0.998547	0.558203
	0.605349	0.0101555	0.979747	0	0.568459	0.168671
	0	0.371867	0.0373587	0	0.00632418	0
	0	0	0.0552603	0	0.852131	0.42545
	0	0.0535631	0.187589	0	0.79115	0.0226676
	0.237558	0	0.0987584	0	0.859665	0.747408
	0.502871	0.22918	0.742805	0.312819	0.259072	0.336946
	0.397239	0.0201176	0.35183	0	0.678207	0.00506746
	0.0727932	0.0325009	0.599469	0	0.303022	0
	0.425152	0.0287474	0.352687	0	0.300086	0.014477
	0.174566	0.0351372	0.340251	0	0.137168	0.248516
	0.0623738	0.0449461	0.0666837	0	0.883982	0.250777
	0.146034	0	0.0267487	0	0.757615	0.11752
	0.607254	0.0861451	0.604917	0	0	0.442711
	0.0105481	0.0157808	0.303973	0	0.382929	0.23095
	0.372293	0.0901259	0.60339	0.289862	1.03551	0.0975922
	0	0.0693415	0.293461	0	0	0.611761
	0.566009	0.41958	0.251564	0	0	0.385653
	0.0324105	0	0.323619	0	0.948251	0.401539
	0	0.00974385	0.405042	0	0.401771	0.378573
	0.267712	0.0318017	0.304126	0	0.766624	0.841324
	0.0112632	0	0.107301	0	0	0.279763
	0	0.22903	0.384445	0.261398	0	0
	0.00911552	0.00456815	0.0136423	0	0.816997	0.28836
	0.048122	0.213117	0.616008	0	0.589021	0.871012
	0.00890302	0.0308198	0.312365	0	0.00446142	0
	0.404019	0.0636802	0.723394	0	0.576403	0.164216
	0.0714153	0.125905	0.635691	0.0273819	0.185296	0.493772
	0	0.0487819	0.559541	0.0246884	0.30006	0.325652
	0.133334	0	0.207343	0	0.732707	0.211792
	0.122018	0	0.0628691	0	0.274434	0.170595
	0	0.180374	0.143835	0	0.513028	0.151251
	0.213143	0.291228	0.494446	0	0	0.521929
	0.0578898	0	0.501577	0	0.790607	0.0168847
	0	0.00815393	0.421328	0	0.0401206	0.101143
	0.348885	0.0933521	0.645388	0	0.655599	0.167758
	0	0.0733571	0.51271	0	0.417117	0.417117
	0	0.083366	0.723028	0.114859	0.00865638	0
	0	0.0873007	0.958184	0	0.230826	0.0808493
	0	0.0100969	0.542622	0	0.0100969	0.423762
	0.289619	0.20208	0.1345	0	0.592113	0.712826
	0	0.118304	0.463286	0	0.380969	0.47537
	0	0	0.286418	0.0674912	0.0343149	0.0836756
	0	0.114439	0	0	0.546656	0.790176
	0.701094	0.0673993	0.31374	0	0.852136	0.763346
	0.00827941	0.00827941	0.453398	0	0.280837	0.235895
	0.0385758	0.0847928	0.623395	0	0.982642	0.162954
	0	0	0	0	0.580174	1.07766
	0.67106	0.0782455	0.0687932	0	0.417953	0.760541
	0	0	0.619345	0	0.33753	0.0619151
	0.093113	0.100495	0.0781838	0	0.767681	0.0161334
	0.339968	0	0.396009	0	0	0
	0	0	0.769389	0	0.447104	0.651822
	0.0956482	0.0704564	0.167626	0	0.743884	0.448354
	0	0.0161278	0.402719	0.293736	0.811778	0.205077
	0	0	0.0406063	0	0	0
	0	0.0626589	0.0712981	0	0.0273359	0
	0.081763	0.255491	0.364777	0.081763	0.260975	0.22194
	0.0109718	0.084578	0.439294	0	0	0.153136
	0	0.0107335	0.7525	0	0.150031	0.312549
	0.0807543	0.118811	0.874734	0	0.0807543	0.782977
	0	0	0.552095	0	0.417271	0
	0.220041	0	0.146281	0	0.146281	0.406865
	0.10297	0.00981158	0.576012	0	0.980699	0.939171
	0	0.278874	0.559898	0	0	0
	0.0218812	0.074577	0.0538307	0	0.181572	0.084791
	0.190981	0.167528	0	0	0.677021	0.888288
	0.337687	0.227636	0.436819	0	0.175399	0.344179
	0	0	0.533671	0.0541777	0.0541777	0.348924
	0.208029	0.0404646	0.363059	0.194523	0	0
	0	0.128815	0	0	0	0.638489
	0.305479	0.0312639	0.584416	0	0.809369	0.384191
	0	0	0	0	0.846834	0.0522582
	0.0554811	0.0554811	0.127066	0	0.0688834	0.371054
	0	0.0514932	0.368374	0	0.79882	0.336536
	0.381271	0.0572674	0.577142	0	0.10482	0.605688
	0.00825944	0.280243	0.22219	0	0.906753	0.0948771
	0.028096	0.028096	0.395014	0	0.961143	0.432687
	0.414988	0.0734366	0.376518	0	0.906798	0
	0	0.105295	0.105295	0	0	0.200552
	0.518905	0.365118	0	0	0	0.69131
	0	0	0.593712	0	0.578675	0.66568
	0	0.185901	0	0	0.622535	0.21628
	0	0.0783843	0.6205	0	0.320663	0.0852147
	0.714287	0.140026	0.140026	0	0.345952	0.505357
	0.331108	0.125776	0.518622	0	0.850269	0.00952787
	0.629039	0.192303	0.469526	0.0272815	0.258517	1.16707
	0	0.0398259	0	0	0	0.680625
	0	0.0301675	0.882322	0	0.0666404	1.09553
	0	0	0	0.207311	0.542988	0.688924
	0	0.411062	0.749777	0	0.541026	0.391036
	0.122947	0	0.0297436	0.140589	0.696315	1.04082
	0.317461	0.0334028	0.258032	0.249246	0.32567	0.589942
	0	0	0	0	0	0.506775
	0	0	0.710981	0	0	0
	0	0	0.91575	0	0.294105	0
	0.181536	0	0.223676	0	0.40143	1.0475
	0.0507769	0.0341361	0	0	1.0409	0.00864389
	0	0	0	0	0.789145	0.591518
	0	0.0393132	0.296266	0	1.1369	0.0918779
	0	0.0548034	0.501897	0	0	0
	0.253229	0	0.44956	0	0	0
	0	0.0722735	0	0	0.0367895	0.295291
	0.365454	0	0	0	0	0
	0.406007	0.0636135	0.427653	0	0.372634	0.246189
	0	0.116998	0.068522	0	0.207424	0.214602
	0.0101263	0.0592743	1.68202	0	1.01181	0.970253
	0.0484864	0.119526	0.417981	0.172005	0.350325	0.194978
	0	0.180398	0.363507	0	0.333172	0
	0.261737	0.28757	0	0	0	0.00677665
	0.346626	0.193605	0.115996	0	0	0.0381042
	0	0	0.457409	0	0.275329	0
	0.0907124	0.0078817	0.068794	0	0.112161	0.0539102
	0	0.0558607	0.394893	0.165988	0.689677	0.361152
	0.134694	0.0990623	0.175842	0.120593	0.657108	0.277946
	0	0.0216573	0.436536	0	0.496043	0.321712
	0.359237	0.259771	0.206063	0.253213	0.226543	0
	0	0.0493146	0.170041	0.103934	0.30916	0.177123
	0	0	0.0468677	0.336373	0.92087	0.454763
	0.160362	0.031135	0	0	0.321719	0
	0	0.0601344	0.123726	0	0.54262	0
	0.358123	0.0377293	0.0740868	0	0.566059	0.975825
	0	0.0166149	0.325942	0	0.325942	0.0329582
	0.192832	0	0.762278	0	0.72005	0.684935
	0.425541	0.0439697	0	0	0	0.44301
	0.134763	0	0	0	0.524294	0.155558
	0	0.104685	0	0	0.339791	0.659789
	0.139828	0.0440388	0	0	0.980522	0.49794
	0.0300634	0	0.161685	0	0.248662	0.41291
	0.0135771	0	0.309135	0	0.169355	0.998991
	0.585338	0	0	0	0	0.906792
	0	0	0.0412901	0	0.493682	0
	0.110023	0.0336351	0.116133	0	0	0.186681
	0	0	0.395788	0	0.116284	0.775416
	0	0.0242376	0.206185	0	0	0.371415
	0.833919	0	0.59297	0	0.580695	0.987654
	0.477092	0.0304866	0.0453882	0	0.737738	0
	0.517995	0.00912927	0.120796	0	0	0.144886
	0	0.116134	0.340506	0	0.831456	0.586024
	0	0	0.95102	0	0.0452244	0.00768086
	0	0	0.77118	0	0.491777	0
	0.257916	0.079724	0.683485	0	0.240274	0.801882
	0.0162757	0.0558423	0.378058	0.0322907	0.590025	0.552964
	0.381419	0.163822	0.202484	0	0.5905	0.376119
	0.0245707	0.0184844	0.0719718	0	0.479741	0.365706
	0	0.201627	0	0	0	0.879493
	0.49407	0	0.35668	0	0.826689	0.526809
	0	0.172012	0.530768	0	0.854391	0.964799
	0.465351	0.176885	0.300628	0	0.0643948	0.322765
	0.149715	0.0302989	0.839453	0	0.314191	0
	0.742233	0.129853	0.68274	0	0	0
	0.546558	0.139726	0.828394	0.479229	0.550889	0.515701
	0	0.00796832	0.0989418	0	0.19557	0.313355
	0.647055	0.0101718	0	0	0.0973415	0.177518
	0	0	0.322614	0	0.234959	0.117029
	0	0.223739	0.17232	0	0.442336	0
	0.587558	0.106108	0.652079	0.227827	0.0237045	0.6008
	0	0.0661993	1.24894	0	0.264113	0.379783
	0.653267	0	0.956354	0	0.645624	0.442126
	0.656517	0.0591815	0.778733	0	0.34107	0.306773
	0	0.0684575	0.320556	0	0	0.0974409
	0	0.168888	0.539707	0	0.913222	0.328164
	0	0.236404	0.333416	0	0	0.158759
	1.1328	0.206794	0	0	0.582366	0.346078
	0.0161145	0.122183	0.100382	0	0.0161145	0.386015
	0.582345	0.0693761	0	0	0.85695	0.482187
	0	0	0.205164	0	0.049367	0.943432
	0	0	0.334754	0.260977	0.564773	0.397406
	0.0257593	0.0913732	0	0	0.56839	0.938811
	0.500973	0.115056	0.530099	0	1.15899	0
	0	0.113535	0	0	0.0677848	0.495448
	0	0.0479085	0.864614	0	0.179232	0.425272
	0	0.0903355	0.367656	0	0	0.496452
	0.0352591	0.149709	0.358134	0	0.561699	0.66375
	0.505728	0.020572	0.188842	0	0.6201	0.0273363
	0.146488	0	0.130327	0	0.0364479	0.555267
	0.311078	0.0628532	1.12358	0	0.711933	0.311078
	0.124448	0.405893	0.0778737	0	0.893237	0.0502525
	0.281646	0.0781895	1.16946	0	0.668615	0.744816
	0.00927869	0.0805627	0.401497	0	0.186547	0.835108
	0.223207	0.0586122	0.874216	0.195226	0.0667119	0.230082
	0.191967	0.200663	0.882911	0	0.451969	0
	0	0	0.0313173	0	0.0616835	0.00792175
	1.18461	0.449388	0.260196	0	0.552999	0.910645
	0	0	0.0776088	0	0	0.68094
	0	0	0	0	0.161694	0
	0.236498	0	0.0254921	0	0.14403	0.932393
	0.780344	0.00956567	0.38592	0	0.207565	0.702516
	0	0	0.147221	0	0.249382	0.350081
	0	0.0771235	0.0771235	0	0.0113885	0.467243
	0	0	0.660712	0	0.123569	0.170322
	0	0.250879	0.957046	0	0.769386	0.777609
	0.115794	0.0988294	0.640341	0	0.524357	0.256769
	0	0.359391	0.0241839	0	0	0
	0.232665	0.202562	0	0	0	1.24412
	0.327285	0	0	0	0	0
	0.328904	0.0766452	0.276598	0	0.590805	0.935672
	0.339347	0.142403	0.012169	0	0.860834	0
	0	0.00575456	0.164587	0	0.257992	0.484452
	0.389778	0.0561687	0.986835	0	0.673214	0.0284787
	0.0246063	0.0148363	0.0813026	0	0.373898	0.317488
	0.165626	0.0674048	0	0	0.165626	0
	0.676125	0.0218452	0.342584	0	0.294404	1.00364
	0.291944	0.24883	0.629048	0	0.217504	0.300349
	0	0.0975201	0	0	0.0975201	0.0923447
	0.174934	0.0809701	0.382997	0	0.471012	0.00560682
	0.0495283	0.251234	0.340893	0	0	0.345397
	0.0585293	0.0421533	0.194968	0	1.23456	0.779182
	0	0	0	0	0.149912	1.01779
	0.102185	0	0.091333	0	0.123541	0
	1.0909	0	0.10153	0	0.745167	1.07018
	0	0	0.427389	0	0.0921167	0.296649
	0.327771	0.217581	0.258343	0	0	0.161979
	0	0.0250754	0.685733	0	0.300413	0.28143
	0	0.157575	0	0	0	0
	0	0.0491848	0.298102	0	0.370272	0.415645
	0	0	0.603509	0	0.243867	0.0707109
	0.222487	0.137361	0.321672	0	0.346006	0.508377
	0.0926554	0.0351429	0.374841	0	0.475022	0.275204
	0.343718	0.134531	0.0592974	0	0.49292	0.00868939
	0	0.333939	0.358784	0.406695	0.369246	1.07057
	0.135322	0.0191364	0.615245	0	0	0.246977
	0.480565	0.0245415	0.712634	0	0	0.736707
	0.35757	0.0704524	0.963967	0	0.415422	0.265543
	0.00492896	0.129581	0.289678	0	0.0714989	0.138225
	0	0.124637	0.664993	0	0.367528	0.0050923
	0.390848	0.0114578	0.235108	0	0.292632	0.668191
	0	0	0.546596	0	0.242287	0.829629
	0.0219663	0.111944	0.474403	0	0.662788	1.46589
	0.514602	0.0172548	0.446444	0.290044	0.0229408	0.294376
	0	0.0137371	0.569661	0.0538511	0.850873	0.973045
	0	0	0.594148	0	0	0.360202
	0.0118112	0.0176649	0.531212	0	0.388827	0.747112
	0.61262	0	0	0	0.0468435	0.87162
	0	0	0.246472	0	0.975716	1.27297
	0	0	0.959028	0	0	0
	0.167331	0.0189918	0.348555	0	0.282125	0.134355
	0.0542017	0.073205	0.0200513	0	0.24963	0.119191
	0.182109	0.0302673	0	0.0051086	0.0596454	0.138482
	0	0.0748015	0.0255606	0.0651454	0.523945	0.430817
	0.213414	0.0778739	0.835473	0.180156	0.325473	0.101016
	0.382357	0.0140145	0.35799	0	0.765572	0.654621
	0.0111339	0.0491544	0.665813	0	0.422792	0.229134
	0.247214	0	0.800647	0	0.274224	0.506957
	0	0.0184724	0.586137	0	0.257463	0.554517
	0	0.0199789	0.8807	0	0.495128	0.00503227
	0.272491	0.00529497	0.397721	0	0.394148	0.010562
	0	0.0575803	0.0575803	0	0.230027	0.102344
	0.498429	0.0682062	0.737818	0	0.196543	0.498429
	0	0	0.570077	0	0.164753	0.331364
	0.335301	0	0.3858	0	1.23678	0.59266
	0	0.0487781	0.19778	0	0.548737	0.458122
	0.140516	0.0442659	0.12732	0.104933	0	0.47217
	0.00693323	0	0.124153	0	1.37721	0.00693323
	0.514123	0.279296	0.0219773	0	0.15414	0.53386
	0.372532	0.170479	0.66746	0.208916	0.773964	0.192623
	0	0	0.589939	0	0	0.470001
	0.686158	0.0342106	0.423854	0	0.0172516	0
	0.693514	0	0.612442	0	0.149967	0.08056
	0	0	0.255843	0	0.798421	0.36494
	0	0.133826	0.171643	0	0.602193	0.264601
	0.626181	0.017972	0.231054	0	0.453784	0.562812
	0.186923	0.0391871	0	0	1.03921	0.564936
	0.172055	0.0180056	0	0	0.665145	0.269163
	0	0	0.32215	0	0.899371	0.247169
	0	0.138011	0.0243654	0	0.263063	0.952946
	0.596014	0	0.489696	0	0.774341	0
	0.499566	0.0422932	0	0	0.89621	0
	0	0.0718675	0.642046	0	0.0305748	0.24641
	0.104944	0	0.818422	0	0	0.400375
	0.233629	0	0.103191	0	0.452427	0.0875892
	0	0.0115953	0	0	0.406466	0.570836
	0	0.0155415	0.402789	0.176618	0.272511	0.227794
	0.452064	0	0.465568	0	1.3291	0.148634
	0	0.0500927	0.737238	0	0.336139	0.167752
	0	0.0130265	0	0	0	0.222441
	0.0053251	0.0315334	0.010622	0	0.010622	0.143962
	0.0758915	0	0.0531477	0	0.197491	0.141175
	0	0	0	0	0.747753	0
	0.254266	0.0802092	0.21013	0	0.776918	0
	0	0.0702799	0.289709	0.298058	0.903153	0.437522
	0	0	0	0	1.26054	1.27532
	0.668239	0	0.480114	0	0.0346089	0.637691
	0	0	0.391683	0	0.214897	0.345828
	0.79395	0.0114237	0	0	0.517523	0
	0	0	0	0	1.42182	0
	0.0612555	0.087905	0.666576	0	0	0.564203
	0.69021	0.0174935	0.421036	0	1.32412	0.147408
	0	0.263964	0	0	0.641961	0.476362
	0.380772	0.0917342	0.0603095	0	0.283508	1.25378
	0	0.297692	0.184211	0	0	0.737551
	0.368978	0.119306	0	0	0.626192	0
	0.647862	0	0.248808	0	0.395442	0.707402
	0	0.583296	0.293455	0	0.140018	0.184252
	0.0669016	0.0610012	0.263841	0	0.683725	0.0248488
	0	0	0.326362	0	0	0.840125
	0	0.0202019	0.0465181	0	0.693126	1.42463
	0	0	0.432397	0	0.518738	1.07688
	0	0.0403506	0.480966	0	0.911267	0.148037
	0.0374001	0	0.0734518	0	0.0426306	0.306975
	0	0.0051279	0	0	0.0646953	0.732188
	0.60613	0.0244987	0.0578189	0	0.00987163	0.708889
	0	0.0155061	0.295497	0	0	0
	0	0.0544978	0.423586	0.232207	0.0456186	0.485783
	0.374248	0	0.316487	0	0	0.388182
	0.840948	0.0921052	1.25649	0	0.418155	0.507768
	0.0732723	0.146604	0.146604	0	0.371766	0.0947786
	0	0.00494506	0.868397	0	0	0.147242
	0	0	0.114346	0	0.192267	0.459312
	0	0.093725	0.00576322	0	0.22197	0.820471
	0	0.0618454	0.0432202	0	1.03698	0.0337758
	1.21594	0.0227819	0.719905	0	0.539032	1.24622
	0.937392	0	0	0	0.0376362	0.867404
	0	0	0.704679	0	0	0.320263
	0.603235	0.0240618	0.363507	0.178003	0	0.511199
	0	0.0059162	0	0	0	0.227256
	0.128173	0	0	0	0.0145454	0
	0.268423	0.00479941	0.548852	0.126374	0.774294	0.234758
	0	0.111021	0.157223	0.147139	0.522891	0.297422
	0	0.0350754	0.413214	0	0.005932	0.237231
	0.038773	0.266188	0.64377	0	0.175653	0.146813
	0.0605677	0	0.176943	0.128716	0.366947	0.813165
	0.575909	0.0973177	0.692031	0	0.441384	0.425608
	0	0.249501	0.00487405	0	0.984279	0.22249
	0.0806396	0.120836	0.18032	0.129554	0.270958	0.534398
	0.0957531	0.0903674	0.634804	0	0.525669	0.329395
	0.393264	0.0293076	0.499781	0.2695	0	0.0118263
	0.394514	0.0982639	0.265687	0.192224	0.231788	0.0215048
	0	0	0.104086	0	0.579526	0.433538
	0	0.164858	0	0.33156	0.360195	0
	0.326084	0.0108015	0.437243	0	0.401545	0.0833115
	0.319144	0.0807445	0.200981	0	0.549341	0.709936
	0.00925496	0.220255	0	0	0.295667	0.305991
	0.475579	0	0.232628	0	0.729401	0.684192
	0	0.0057246	0.457325	0	0.341895	0
	0	0.0306854	0.737468	0	0.663236	1.45497
	0	0.0853355	1.11185	0	0	0.137138
	0	0	0.152446	0	0.803168	0.288444
	0.85151	0	0.13966	0	0.174152	0.235213
	0.702937	0.0891344	0.550527	0	0.872375	0.764474
	0.401933	0.0638772	0.62807	0	0.532738	0.0163559
	0.857271	0	0.0384935	0	0.116305	0.6011
	0	0	0.620821	0	0.174432	0.00575825
	0.231981	0.00565994	0.147495	0	0	0.565644
	0.0475598	0.144852	0.161568	0	0.982347	0
	0.00601439	0	0	0	0	0.405931
	0.326613	0.100157	0.385033	0	0.0841457	0.310654
	0.0517488	0.138641	0.44319	0	0.231306	0.166004
	0	0	0.381934	0	0.105326	0.935337
	0.464354	0.0920339	0.00834784	0	0	0.424035
	0.0181227	0.104115	0.251934	0	0	0.86099
	0.195302	0.00512206	0.299507	0	0	0.340522
	0	0.0792153	0.152613	0	0.341891	0.495415
	0	0	0.454631	0	0.00536494	0.28378
	0	0.0558105	0.0801845	0	0.227676	1.02782
	0	0.0150087	0	0	0.948857	0.00502797
	0.00539496	0	0.217873	0.321117	0	0.0475378
	0	0.106391	1.04382	0	0.333138	0.0383029
	0.274888	0.00464191	0.292406	0	0.55108	0.0410213
	0.258946	0.0444678	0.207945	0	0.00378212	0.00378212
	0	0.202949	0	0	0.572219	0.429804
	0.203434	0.0052329	0.159683	0	0.541619	0.324257
	0.163804	0.277912	0.445101	0	0.478742	0.093391
	0.00742729	0.0221184	0.909682	0	0.364533	0
	0	0.0443761	0	0.455472	0.360683	0.836991
	0	0.00402555	0.245549	0.0587452	0.0850217	0
	0.491563	0.056829	0	0	0.0124525	0.463057
	0	0.255036	0.620078	0	0.320386	0.631178
	0.105442	0	0.839065	0	0.204945	0.357425
	0.0108625	0	0	0	0.625014	0.093759
	0.00500452	0.0296582	0.830473	0	0.569629	0
	0	0	0.552367	0.275169	0.122056	0
	0.581885	0.00508003	0.363249	0	0.618217	0.146592
	0.0889773	0.0270015	0.220199	0.0839569	0.312435	0.590372
	0.00968401	0.0144911	0.481143	0	0.412692	0
	0	0	0.608367	0	0	0.205248
	0.463313	0.0521897	0	0	0.363494	0.689934
	0	0.069201	0.215551	0	0.0547701	0.45312
	0	0	0.445942	0	0.373155	0.416255
	0.101626	0.186178	1.1761	0	0.375543	0.542836
	0.416795	0.0640019	0.18089	0	0.426994	0
	0.686568	0.106412	0.556522	0	0.240462	0.245097
	0.130832	0.140999	0.321039	0	0	0.218821
	0.0485042	0.0602713	0.708661	0.399303	1.17641	0.661699
	0	0.21772	0.0779602	0	0.0685411	0.416657
	0.107063	0.0957174	0.870221	0	0.0369759	0.243912
	0	0.0349287	0.49459	0	0.169606	0.193323
	0.0627767	0.182127	0.863467	0	0.264169	0.230442
	0.137889	0.0224911	0.652955	0.142831	0.601328	0.450214
	0	0.050112	0.203847	0	0.407869	0.789593
	0	0	0	0	0	0.932136
	0.403421	0.0980552	0.462375	0	0.462375	0.264677
	0.169409	0.40442	0.272945	0	0.936361	0.52425
	0	0.174092	0	0	0	0.907029
	0	0.219616	0.123426	0	0.426037	0.459057
	0	0	0.344634	0	0.262467	0.78429
	0.236105	0.0285354	0	0	0.858866	0.179681
	0	0.0220883	0.687272	0	0.005568	0.173819
	0	0.0485167	0.170943	0	0.726982	1.13552
	0	0.0188331	0.525175	0	0.471274	0.693785
	0	0.0402336	0	0	0.343972	0.310143
	0.354751	0.144911	0	0.26227	0.118626	0.102517
	0.153472	0.148188	0.727051	0.313796	0.313796	0.09376
	0	0.0156561	0.0710516	0	0.343775	0.569807
	0	0	0.610784	0.250033	0.469457	0
	0.0367352	0.0520749	0.313961	0.0771295	0.518123	0.385535
	0.28733	0	0.265566	0	0.134073	0
	0.00512879	0.0253849	0.380336	0	0.568803	0.169836
	0.585646	0.182537	0.420437	0	0.391141	0
	0.410055	0	0.0500577	0	0.845099	1.01222
	0	0.0124446	0.0186094	0	1.10604	0
	0	0	0.0586865	0	0	0
	0.395013	0.0497324	0	0	1.29861	0.57884
	0.519262	0	0.289108	0	0.573023	0.570111
	0.190419	0	0.0898672	0	1.20702	0.254115
	0	0.0190664	0.991004	0.148774	0.223336	0.422747
	0.306186	0.170177	0.252987	0	0.120394	0.0620076
	0	0.117276	0.370147	0	0.479909	0.754284
	0	0.330383	0.0788933	0	0.992736	0.738318
	0.412305	0.20215	0.460566	0	0.867742	0.1392
	0.219583	0.00644125	0.403849	0	0.0317992	0.657797
	0	0.160221	0.848987	0	0	0.929686
	0.196152	0.0910769	0.0340863	0.0424294	0.025673	0.297686
	0.347138	0.0450809	0.203717	0	0.475417	0
	0	0.0191398	0.280415	0	0.32328	0.0471796
	0.398725	0.0435752	0.721633	0	0.398725	0.016564
	0.285271	0.0229022	0.376749	0	0.673664	0.165125
	0	0.0568926	0.351715	0	0.579118	0
	0	0	0.605842	0	0.0283125	0.401413
	0.194542	0.301555	0.482674	0.218799	0.746482	0.369773
	0.300895	0	0.3951	0	0.463094	0.0564066
	0.334583	0.0248382	0.456432	0.0490744	0.752197	0
	0	0	0.361453	0	0	0.730007
	0	0.00533763	0.274416	0	0.680085	0.00533763
	0	0.0862011	0.229581	0	0.521287	0.632468
	0.233194	0.215333	0.443902	0	0.384836	0.45814
	0.181571	0.053306	0	0	0.16904	0.741949
	0.574586	0.180574	0.209796	0	0.154829	0.18901
	0.0606408	0.00623226	0.123355	0	0.202991	0.970003
	0	0	0.103793	0.0921266	0.710892	0.625153
	0.479701	0.00529279	0.0105577	0	0.0863758	0.205544
	0.482655	0.0361909	0.286444	0	0.318221	0.0182592
	0.689775	0.00485714	0.74212	0.101759	0.157357	0.837139
	0.586742	0.0721567	0.408004	0	0.242439	0.558608
	0.158158	0.0491687	0.2044	0.220699	0.463515	0.305882
	0	0.100387	0	0	0.841563	1.0018
	0.567339	0.0955085	0.482672	0	0.202368	0.13797
	0.287545	0.0548473	0.0645042	0	0.58183	0.252331
	0	0	0	0.038729	0.151515	0.536959
	0	0.0186571	0.455855	0	0.47945	0.23896
	0.0051205	0.138783	0.410936	0	0	0.0152835
	0.307625	0.0517789	0	0.354272	0.56293	0.549387
	0	0	0.351424	0	0.908122	0.210211
	0	0.00623185	0.14521	0.0246977	1.45002	1.40809
	0	0.266491	0.956751	0	0	0.709798
	0.199968	0	0.728087	0	0.860307	0.294725
	0	0	0.00759081	0	0.0804888	0.344627
	0.431738	0.0228763	0.297954	0.303663	0	0
	0.020674	0	0.482248	0	0.499298	0.13038
	0.0121746	0.194215	0	0	0.00610583	1.11771
	0.60506	0.125313	0.207499	0	0.00605	0.172371
	0.154587	0.0557349	0.31668	0	0	0.0466588
	0.158012	0	0	0	0.212391	0.123016
	0	0.059883	0.853302	0	0.524208	0.035366
	1.0287	0	0.617574	0	0.439705	0.631524
	0	0	0	0	0.523539	0
	0	0.144932	0	0	0.448116	0.0614331
	0	0.00496383	0.534512	0	0.554718	0.516863
	0.147901	0.0238641	0.367681	0	0.934396	0
	0	0.124745	0	0	0	0.0188021
	0.218432	0.0644567	0.50026	0	0	0.405029
	0	0	0.06196	0	0.564772	0.402379
	0.616975	0.184474	0.366034	0	0.515983	1.05941
	0	0.234703	0.77129	0	0.655376	0.0138268
	0	0.332137	0.369126	0	0.430737	0.222742
	0.694511	0	0.313107	0	0.976257	0.428393
	0.748321	0.119275	0.0327932	0	0.867161	0.24166
	0	0	0.307651	0	0.174548	0.113396
	0.824372	0.0153093	0.314993	0	0.540788	0.102547
	0.0490949	0.0062703	0.258997	0.224423	0.204116	0.573051
	0.0146245	0.263906	0.111412	0	0.187515	0.765047
	0	0.486284	0	0	0	0.0647406
	0.561548	0.0563356	0	0	0.0766693	0
	0	0.0044972	0.44109	0	0.581535	0
	0.348733	0.025125	0.00507576	0	0	0
	0.164321	0.0235332	0.327107	0	0.123074	0.164321
	0.0160837	0.0474952	0.309032	0	0.891021	0.578669
	0.388422	0.120698	0.248597	0	0.357502	0.0561232
	0.598597	0.129802	0.347701	0.113797	0.176336	0.129802
	0	0	0	0	1.13075	0
	0.0641661	0	0.0773963	0	0.124462	0
	0.428878	0	0.548965	0	0.553982	0.292376
	0.293931	0	0.480537	0	0	0.410646
	0	0	0.71011	0	0.467065	0.21685
	0	0	0.326779	0	1.0007	0.178957
	0	0.0722753	0.00533938	0	0.79296	0.171748
	0.328299	0	0.43568	0	0	0
	0	0.0300283	0	0	0.491068	0.109606
	0	0	0.212717	0	1.12352	0.0438679
	0.53045	0.0791044	0	0	0.764863	0.560804
	0	0.0712602	0	0.271924	0.661378	1.27362
	0	0.00517505	0.336123	0	0	0
	0.367335	0	0.515634	0	1.15811	0.504976
	0	0	0.0847008	0	0.841558	0.970092
	0	0.203115	0.340311	0	0.612237	0.970185
	0	0.224749	0.0395297	0	0.563054	0.822053
	0	0.10056	0.385784	0.0261039	0.786378	0.510713
	0	0.107238	0.749442	0	0.406338	0.304368
	0.306788	0.0316479	0.400806	0	0.318548	0.29089
	0.0542636	0.0965702	0.340427	0	0.565542	0.277153
	0.659298	0	0.812587	0	0	0.168076
	0.29456	0.104637	1.0781	0	0.29456	0.268271
	0.0466756	0.0766246	0.0766246	0.239619	0.196942	0.192573
	0	0	0.256152	0	0.401745	0
	0	0.0691622	0	0	1.17447	0.395243
	0.00483083	0.156566	0.605906	0	0.417492	0.172993
	0.219675	0	0.280874	0	0.231439	0.963722
	0	0.0331188	0.207096	0	1.07137	0.582955
	0.153455	0.0226188	0.607041	0	0.682072	0.971306
	0.377022	0.157225	0.981089	0	0.385044	0.593435
	0	0.147635	0.460611	0	0.99276	0.588111
	0	0.102732	0	0	0.236891	1.08956
	0.864925	0.194863	0.481931	0	0.28167	0.220443
	0	0	0.354818	0	0	1.12271
	0.344572	0	0.68679	0	0.605985	0
	0.31024	0.236755	0.112754	0	0.673217	0.401776
	0	0	0.883753	0	0.620136	0.147979
	0	0.209438	0.0273587	0	0.14917	0.72785
	0	0.00574783	0.844068	0	0.149629	0.429239
	0.906566	0	0	0	0.134916	0.776736
	0	0	0.262357	0	0	0.485496
	0.619452	0.0266622	0.807795	0	0.508027	0.706453
	0.146251	0.0239399	0.00603893	0	1.15325	0.458368
	0	0.0910191	0.796423	0	0	0.511043
	0	0.0106642	0.528791	0.0316572	0.360614	0.425725
	0.105156	0.0303363	1.2653	0	0.448997	0.429142
	0.456678	0.135147	0.144136	0	0.761804	0.582612
	0	0.117599	0.436133	0	0.343615	0.920046
	0.29727	0.0220883	0.0804298	0	0.731223	0.237448
	0.553061	0.152513	0	0	0.52321	0.488962
	0.0102716	0	0	0	1.16931	1.15315
	0	0	0	0.0772562	0.211558	0.00534031
	0	0.133074	0.0884848	0	0	0.365503
	0	0.0362304	0	0	0.0421432	0.494397
	0.740983	0.020007	0.238581	0.0962576	0.791079	0.132308
	0	0.179813	0.384384	0	0.538394	0.12139
	0	0.102116	0	0	0.957803	0.553395
	0.200564	0.0651327	0.624964	0	1.19239	0.996741
	0.297644	0	0	0	0.22987	0.204507
	0.217174	0.169581	0.614625	0	0.271449	0.0723935
	0	0	0	0	0.048972	0.223907
	0.0251437	0.195921	0.0617123	0	1.29943	0.549304
	0	0.192836	0	0	0	2.0056
	0.190509	0.108381	0.714404	0	0.837279	0.987787
	0	0.197738	0.0895702	0	1.09829	0.992943
	0.0165406	0	0.371778	0	0.0903065	0.115386
	0	0.0518091	0.218817	0	0	0.36558
	0	0.059211	0	0	1.23546	0.466711
	0.31279	0	0.768781	0	0.589872	0.233727
	0.00636498	0.061897	0.061897	0	0.462126	0.805915
	0.0458193	0.0116531	0.442608	0	0	0
	0	0	0.572324	0	0.786783	0.575595
	0	0	0.00752846	0	0.641468	1.19995
	0	0.0226523	0.761255	0	0.796992	0
	0.32606	0.096186	0.332663	0	0.128989	0.390205
	0	0.102601	0.791431	0	0	1.69525
	0	0.26087	0	0	0.483682	0.652375
	0.286948	0.0149941	0	0	0.852084	0.721489
	0	0.0784029	0.0477754	0	0.842104	0
	0	0	0	0	0.512723	0.187394
	0	0.0919167	0.620353	0	0.915937	0.0136596
	0.920565	0.270457	0.59076	0	0.698457	0.7243
	0	0.00965145	0.327811	0	0.587842	0
	0	0.0142433	0	0	0.850697	0.212443
	0.122408	0.106573	0.395649	0	0.354985	0.0904822
	0.00623266	0.00623266	0.341025	0	0.409737	0.281496
	0	0.0394457	0.197549	0	0.548098	1.08518
	0.0119405	0.00598807	0.766936	0.0862608	0.052644	0.376008
	0.493277	0.0237782	0.113611	0	0.710356	0.507863
	0	0.017515	0.794479	0	0.0232858	0.0572282
	0	0.010449	0.289769	0	0.369084	0.0156328
	0	0.067734	0.181872	0	1.25468	0.966233
	0.637559	0	0.765412	0	0.0438957	0.351141
	0	0.0571813	0.843322	0.199407	0.695802	0.183207
	0.444226	0.0619583	0.13437	0	0	0.309102
	0	0.0161264	0	0	0.375142	0.107777
	0.589742	0.0174424	0.566714	0	0.005848	0.136826
	0.0983666	0.083464	0.489245	0	0.495894	0.634873
	0	0	0.838396	0	0.440156	0.167812
	0.58508	0.00508407	0.164154	0	0.289981	0.124447
	0	0	0.567271	0	0.918622	0.142098
	0.116576	0	0.0317453	0	0	0.0421071
	0	0	0	0	0	0.255156
	0	0	0.0106801	0	0.207707	0.729349
	0.989004	0	0.494993	0	1.37211	1.26667
	0.601116	0.336689	0.385905	0	0.651461	0.353365
	0.367786	0.0502558	0	0	0.0128027	0
	0	0	0	0	1.05047	0.770165
	0.390135	0.10487	0.409641	0	0.436325	0.0675009
	0.0197321	0.147924	0.497339	0	0.0197321	0.118859
	0.542434	0.00677125	0	0	0.327338	0.897705
	0	0	0	0	0.397006	0.019307
	0	0.205346	0	0	0	0
	0.639578	0.0590401	0.699023	0.204315	0.307027	0.849292
	0.799463	0	0.469203	0	0.945523	0.0133647
	0.347947	0	0.252318	0	1.55567	0.706084
	1.04015	0.263136	0.474935	0	0.13763	0.57609
	0.0683262	0.20399	0.00704657	0	1.01295	0.387835
	0.025499	0	0.437494	0	0.260061	0
	0.273494	0.0113733	0.210652	0	0.597643	0.269134
	0.0363941	0.00615841	0.658964	0	0.579156	0.453938
	0.115273	0.321182	0	0	1.03474	0.506679
	0.291209	0	0.465657	0	0.69724	0.865376
	0.146638	0.0905361	0.51513	0.104859	0.309872	0.0711134
	0.0688374	0.250796	0.451137	0	0.912032	0.464661
	0.640508	0	0.270328	0	0.604298	0.600604
	0	0	0.602024	0	0.754031	0
	0.362791	0.0335103	0.922859	0	0.734682	0.424097
	0	0	0.101766	0	0.469152	0.43711
	0.669704	0.0588699	0.835713	0	1.03447	0
	0.160177	0.239805	0.117852	0	0.70038	1.35858
	0.4254	0.0654932	0.239601	0	0.0278119	0.503374
	0.154917	0.0236553	0.750976	0	0.534239	0.707692
	0	0	0.708726	0	0.433031	0.5094
	1.07714	0.00603265	0.33168	0	0.542356	0.0120291
	0.0720985	0.0643395	0	0	0.687385	0.102546
	0	0.199436	0.0064706	0	0.0506291	0
	0.468838	0.0454103	0.817998	0.0564479	0.910928	1.07034
	0	0.106695	0.106695	0	0.171983	0.721317
	0	0	0.24801	0	0.195578	0.372712
	0.310604	0.190388	0.540847	0	0.265084	0.0997183
	0	0.100476	0.328881	0	0.0488542	0.390974
	0.335603	0.146989	0.714848	0	0.023187	0.0402311
	0.337876	0.0293406	0.372661	0	0.264451	0.241329
	0	0	0	0	0.553127	0.186988
	0	0	0.457295	0	0.631957	0.435029
	0	0.222573	0.467576	0	0.433034	0.453902
	0.010336	0.108213	0.239118	0	0.0702039	0.951504
	0.341974	0.034351	0.246534	0	0.884267	0
	0	0.0841882	0.465542	0	0.0109194	0.45166
	0.068718	0.143342	0.731823	0	0	0.011786
	0	0.0239701	0.560787	0	0	0.236539
	0	0.0224134	0.30109	0	0.30109	0.967739
	0	0	1.02427	0	0	0.775774
	0.812715	0	0.719918	0	0.344021	0
	0	0.0526155	0.247584	0	0.575461	0.459614
	0.113223	0.240951	0.257935	0	0.26632	0
	0.440392	0.0339977	0	0	0	0.169269
	0	0.0136148	0.314893	0	0.585036	0
	0	0	0.323703	0	0.741428	0.640936
	0.913079	0.145327	0.401	0	0.806167	0.0237792
	0.360478	0	0.879853	0	0.551245	0.774463
	0	0.0474757	0.453446	0	0.471813	0.73207
	0	0.380546	0.588202	0	0.709162	0.655531
	0	0	0	0.233745	0.0369273	0.140171
	0	0	0.257063	0	0.217196	0.864856
	0.0754745	0.00710161	0.590748	0	0.0621688	0.272758
	0	0	0.37999	0	0.436713	0.340304
	0	0.0278731	1.03533	0	0.186415	0
	0.367542	0.0343391	0.581402	0.190301	0.541553	0.35712
	0.31369	0.0264447	0.459224	0.12574	0.886641	0.221443
	0.0122762	0.254851	0.629666	0	0.200762	0.696481
	0.619171	0.394397	0.91968	0	0.805463	0.656639
	0	0.00640239	0.89148	0.159922	0.321324	0.268729
	0.416194	0.0564468	0.839954	0	0.56242	0.115641
	0	0	0.460946	0	0.0958967	0.344817
	0.470604	0.233008	0.111988	0	0.481123	0.163605
	0.392006	0.416187	0.309119	0	0.939056	0.439797
	0	0.0161671	0.988385	0	0.129744	0.0161671
	0	0.206179	0.059821	0	0.512407	0.340112
	0.0870754	0.0717971	0	0	0	0.187948
	0.355622	0.119889	0.664771	0	0.66091	0.133093
	0.00676484	0.0528791	0.145068	0	0.606988	0
	0.155244	0.0582496	0.535182	0	0.717665	0.107922
	0	0.00760021	0	0	0.811456	0.387307
	0.53808	0.0614266	0.399435	0	0.339234	0
	0	0.148439	0.777281	0	0.291556	0.46427
	0.150119	0	0	0	0.678966	0.68212
	0	0.0903652	0.53424	0	0.0431883	0.23492
	0.392858	0.100416	0.784487	0.10571	0.472777	0.100416
	0	0.0193584	0	0	0.714178	0
	0.286012	0	0.461428	0	0	0.176594
	0	0.158476	0.40126	0	0.434241	0.725671
	0	0.0171587	0	0	0	0.104008
	0.0281203	0.0446207	0.21935	0	0.143239	0.255338
	0	0.055125	0.531407	0	0.243949	0.588066
	0	0	0.163172	0	0.943475	0
	0.20772	0	0	0	0	0.570732
	0	0.0433104	0.18427	0	0.516754	0.564619
	0.179107	0.043858	0.412101	0	0	0.683472
	0.463716	0.191485	0.513729	0	0.382034	0.113251
	0.162794	0.0268358	0.0971236	0	0	0.53085
	0.955924	0.0953712	0.38158	0	0.996317	0
	0.484366	0.168615	0.595186	0	0	0
	0.17412	0	0.292709	0.0934732	0	0.275355
	0.0973012	0	0.103079	0	0.576173	0.60797
	0	0	0	0	0.227968	0.846931
	0	0.0539131	0.673874	0	0.267871	0.366824
	0.140186	0	0.242792	0	1.2875	0
	0	0	0	0	0.595812	0
	0	0	0.103787	0	0.928655	0.919353
	0	0	0	0	0.499854	0.562634
	0	0.0432476	0.425501	0.495213	0.534821	0
	0.591961	0	0.0470085	0	0.449083	0.232734
	0.155708	0.068856	0.0318871	0	0.360588	0.953249
	0.340888	0.0663988	0.128662	0	1.06253	0.407765
	0.115328	0	0	0	0.611647	0.604994
	0.0698124	0.0153755	0.704398	0	0.130545	0.582334
	0.0606388	0.171888	0.223192	0	0.770913	0
	0.608002	0.0136241	0.40592	0	0.897735	0.128546
	0.249604	0.212874	0.315035	0	0	0.396107
	0	0	0.585558	0	0.00645064	0.59631
	0.631361	0.0546594	0.362531	0	0.624698	0.753121
	0.401944	0.0761796	0	0	0.654142	0.428078
	0.427002	0	0.471147	0	0.0733374	0
	0.152001	0	0.182856	0	0.97139	0.20291
	0.464106	0.139068	0.498678	0	0.0485369	0.918071
	0.00687525	0.00687525	0.0405598	0	0.955724	1.11932
	0	0.0848637	0.0433318	0	1.17034	0.303266
	0.7265	0	0.343042	0.137208	0.652723	0.369902
	0	0.109586	0.0953311	0	0.88651	0.49927
	0	0.163102	0.524104	0	0.201378	0.0938734
	0	0.53153	0.397158	0	0.433288	0
	0.0197095	0.0580001	0.306227	0	0.136252	0.35392
	0.0743258	0	0.111817	0	0.650033	0.111817
	0	0.0825486	0.0226877	0	0.803527	0
	0.290313	0.0104714	0.282408	0	0.599419	0.233617
	0.570501	0	0	0	0.605827	0.376287
	0.697365	0.132281	0.258632	0.20999	1.21232	0.666271
	0	0.0207016	0.33837	0	0.983347	0.527979
	0.0267932	0.0528872	0.401609	0	0.534175	0.357013
	0.0692548	0.0409792	0.102163	0	0.89451	0.852093
	0	0.00619193	0.549805	0	0.858763	0.293872
	0	0	0	0	0.739748	0.315298
	0.443522	0.0638828	0.0827453	0	0.747303	0.568851
	0.355295	0.00531836	0.0106086	0	0.051952	0
	0.525752	0	0.207483	0	1.09163	1.02496
	0.391493	0.101755	0.464951	0	0.207938	0.73892
	0.102621	0	0.748979	0	0.991402	0.00567184
	0.0897465	0.119592	0	0	0.00550815	0.557128
	0.51771	0.312534	0.0852062	0	0.177778	0.320635
	0.144483	0.0057406	0.555416	0	0.736251	0.313682
	0.078897	0.0203155	0.078897	0	0.680494	1.14244
	0	0.0486009	0	0	0.772583	0.730303
	0.776994	0.0210426	0.0105767	0	0.0913891	0.955603
	0	0.00548267	0.759885	0	0.701651	0.387169
	0.544331	0.308754	0.973572	0	0.16809	0.0215568
	0	0	0.0323933	0	0	0
	0.197566	0	0.713028	0	1.14344	0.588299
	0	0	0	0	0.00526517	0
	0.435675	0	0.81986	0	1.45437	0.028332
	0.0242952	0.0146478	0	0.195909	0.652204	0.0526911
	0	0.00975676	0.622079	0	0.392326	0.421693
	0	0.0411923	0.0512306	0	0.336114	0.0208082
	0.0142568	0.0626132	0	0	0	1.21255
	0	0.0340557	0.717433	0.0340557	0	0.260003
	0.425739	0.182356	0.550918	0	0.417706	0.300913
	0.00475387	0	0.366837	0	1.21441	0.412027
	0	0.0191143	0.319408	0	0.83823	0.109561
	0	0	0.484721	0	0.487765	0.434713
	0.183569	0.0114483	0.458351	0.511517	0.758065	0
	0	0.0103634	0.158614	0	0.29548	0.650617
	0	0	0	0	0.299529	0.0192155
	0.339438	0	0.165197	0	0.805324	0.714335
	0.178843	0.00999265	0.922851	0	0.790786	0.815526
	0	0.0352049	0.983525	0	0.710008	1.36159
	0.280283	0.0459816	0.513145	0	0	0
	0.0730878	0	0.470968	0	0.445394	0.706144
	0	0.120428	0.524834	0.171765	0.0045603	0.857602
	0	0.128131	0.248825	0	0.560679	0.120081
	0	0.0404752	0	0	0.599671	0.751339
	0.186798	0	0	0.0928408	0.7884	1.21251
	0	0.0146452	0.141888	0	0.544006	0.0385871
	0.187958	0.0442405	0	0	0	0.741238
	0	0	0.113039	0	0	0.455689
	0.207129	0.0247075	0.0862282	0	0.590833	0.590833
	0.45105	0.241832	0.118131	0	0.432731	0.219202
	0.686951	0	0	0	1.32438	0.222519
	0	0	0.55785	0	0.925495	0.0429982
	0	0	0.489299	0	0.270138	0.640689
	0	0.0656638	0.210627	0	0.615958	0.717285
	0	0.267366	0	0	0.76351	0.96602
	0	0	1.02982	0	0	0
	0.265104	0	0.220812	0.226457	0.483199	0.328067
	0.708772	0.280472	0	0.227925	0.503823	0
	0.0710854	0	0.0862187	0.34888	0.724725	0.478679
	0.284958	0	0.520898	0	0.0698755	0.0623483
	0.952298	0.19759	0.145005	0	0.0382695	0.312403
	0.575701	0	1.06974	0	0.680674	0.973133
	0.849495	0.0658416	1.14664	0	0.419877	0.0224324
	0	0.0070993	0	0	0.93733	0.0621492
	0	0.0415969	0.0749863	0	0.930647	1.01106
	0.0867112	0.0112591	0.231447	0	0	0.0918889
	0	0.0890567	0	0	0	0.00663101
	0	0	0.433164	0	0	0.265633
	0	0.0466072	0.330947	0	0.251741	0.235118
	0.217621	0	0.989297	0	0	0
	0	0	0	0	0.932113	0
	0.438488	0.43458	0.947212	0	0.82777	1.21515
	0	0.129249	0.124387	0	0.871616	0.559945
	0.0344773	0	0.155615	0	0.543845	0.788314
	0	0	0.177392	0	0.599972	0
	0	0.0200628	0.217677	0.154599	0.621265	0.261529
	0.0931015	0.022966	0.576942	0	0.285096	0.267473
	0.458631	0.098145	0.589388	0	0.0676363	0.855115
	0.0830812	0	0.253686	0	0.410937	0.33952
	0	0	0	0	0.277999	0.114166
	0	0.0239383	0.436662	0	1.05274	0
	0.425021	0	0	0	0.813093	0.464771
	0.568621	0	0.995123	0	1.17845	0.227356
	0.00964334	0.0239362	0	0	0.982648	0.160774
	0.345996	0.0568152	0.802826	0	0.84675	0.345996
	0	0	0.166856	0	0	0.783024
	0.644899	0	0	0	0.91584	0.827941
	0.631796	0.357113	0.141915	0	1.19174	0.395867
	0	0.0562737	0.612039	0	0.00481233	0.593559
	0	0	0	0	0.302232	0.610565
	0.0103875	0.18098	0.288282	0	0.905138	0
	0	0	0.427254	0	0.572454	0.32448
	0	0	0.443878	0	0.62246	0.141833
	0	0.312175	0.138615	0	0.0416029	0.552791
	0.768725	0.0470829	0.0106561	0	0.717783	0.785959
	0.475287	0	0.223983	0	0.453896	0.0168771
	0.149592	0.202738	0.0934617	0	0.124468	0.619859
	0	0.0110768	0.144912	0	0.961289	0.474395
	0.00505941	0	0.132801	0	1.31746	1.13952
	0	0	0.910436	0	0.919219	0.332641
	0	0.131754	0	0	0.0557885	0.577946
	0	0.0599666	0	0	0.747834	0.322311
	0.00487784	0.0753265	0.90693	0	0.699218	0.682062
	0	0.0597532	0.0438078	0	0.0166536	0.276926
	0	0.0317549	0.193052	0	0.718727	0.317921
	0.481029	0.0399224	0.109215	0	0.250844	0.712271
	0.917274	0.0568164	0.561986	0	0	0
	0.00578216	0.0229307	0.213299	0	0.98428	0
	0.247514	0.0808898	0.51102	0	0	0.263825
	0	0.218767	0.450157	0	0.598404	0.223667
	0.39744	0	0.189916	0	0.715758	0.0069474
	0	0.154794	0	0	1.3966	0.858774
	0	0.0677641	0.269771	0	0	0.233429
	0	0.351755	0.0652722	0.0277163	0.592992	0.481368
	0.783338	0.28993	0.555179	0	0.837482	0.369155
	0.0355522	0.516158	0.705783	0	0.225813	0.00601383
	0.388808	0.0650411	0.0872816	0	0.1594	0.338768
	0.194762	0.0311312	0.0906288	0	0.326259	0
	0.355931	0.0730284	0.352133	0	0.497114	0.855639
	0.568845	0	0.509502	0	1.11424	0.674865
	0	0.101198	0.181046	0	0.341191	0.43632
	0	0.107793	0.147854	0	0.402958	0
	0	0.271924	0.610478	0	0	0.260874
	0	0	0.150451	0	0.116002	0.262453
	0	0	0.267787	0	0.460805	0.163414
	0.294234	0.00467533	0.580703	0	0.00467533	0.0502644
	0	0.00477101	0.330855	0	0.631252	0.930254
	0.215027	0.00443267	0.236297	0	0.539556	0.453038
	0	0.0109322	0	0	0.628012	0.929568
	0	0	0	0.201072	0.0435791	0.0244447
	0	0	0.27823	0	0.0344849	0.834303
	0	0.170764	0	0	0.680648	0.358531
	0	0.112331	0	0	0.341885	0.605507
	0	0	0	0	0.594392	0.17456
	0	0	0.389515	0	0.0465271	0
	0.565597	0.0162804	0.933298	0.220103	0.366841	0.498107
	0	0.024482	0.392591	0	0	0.581173
	0	0.0565298	0.255255	0	0	0.270162
	0.108042	0.0783455	0.112907	0	0.701109	0.248827
	0.315199	0.0756618	0.106414	0	0.00559843	0.0331299
	0.268578	0.0742033	0.667821	0.0253512	0.839225	0.0789598
	0.179708	0.368963	0.258744	0	0	0
	0	0	0.522204	0	0.0612457	0
	0.0327088	0.00827804	0.181903	0	0	0
	0.292526	0.0936422	0.28119	0	0.114061	0.160144
	0.522818	0.00472519	0	0	0	0.238996
	0.0869301	0.00566022	0.412682	0	0	0.640195
	0.10064	0.110169	0.255546	0	0.938607	0.00527997
	0.0834619	0.0960259	0.386533	0.253571	1.12786	0.405036
	0	0.103654	0	0	0	0.391597
	0.00503838	0.0150396	0.641377	0	0.944252	0.543664
	0	0	0.202248	0	0.361992	0.446868
	0.129401	0.00551063	0	0	0	0.204213
	0.313092	0.0943843	0.912059	0.18455	0.81886	0.0943843
	0	0.0105189	0.259347	0	0.465096	0
	0	0.0603979	0.164222	0	0.560335	0
	0.302879	0.0127051	0.494274	0	0.554802	0.033528
	0	0.0430043	0.136692	0	0.741251	0
	0.197223	0	0.391154	0	0.961708	0.0508207
	0	0.389087	0.244146	0	0.567144	0.707392
	0.273488	0.39113	0.475346	0	0.504668	0
	0	0	0.568926	0	0	0.0482597
	0.291354	0	0.483061	0	0	0.363286
	0	0.33468	0.736972	0	0.630825	0.595364
	0	0.291728	0	0	0.544867	0.276034
	0	0	0.384199	0	0	0.828295
	0	0	0.139453	0	0.52161	0.339031
	0	0	0.00454647	0	0.327381	0.120084
	0.0467332	0	0.0693055	0	0	0.229801
	0.00596903	0.00596903	0.229075	0	0.0294951	0.484052
	0	0	0.438279	0	1.04887	0.0155932
	0.781628	0.296864	0.0309376	0	1.43413	0.919571
	0	0	0.486989	0	1.11868	0.370762
	0	0	0.672863	0	0.396034	0.294119
	0	0.0137203	0.346738	0	0.301791	0.512836
	0	0.0586103	0.240298	0	0.0223833	0.620661
	0	0.00946221	0.258295	0	0.445275	0.426834
	0	0.208538	0	0	0.889296	0.75672
	0.0133138	0	0.582643	0	0.450833	0.682291
	0.122451	0.258973	0	0	0.594235	0.483203
	1.03968	0.0241487	0.0523777	0	0.0241487	0.0477279
	0.42522	0.0577797	0.706759	0	0	0.264528
	0	0.00612033	0.482456	0	0.54132	0.395407
	0	0.0641659	0	0	0.496986	1.31801
	0	0	0.0670868	0.00628822	0.549122	0.167997
	0.248005	0.072686	0.547426	0	0.919428	0.293998
	0.295721	0	0.331641	0	0	0
	0	0	0	0	0	0.214568
	0	0.120076	0.490172	0	1.05658	0.440097
	0.495517	0.303261	0.997044	0	0	0
	0	0	0	0	0.683326	0.309027
	0.347319	0.0597029	0	0	0.836089	0.203412
	0.428484	0.0760565	0	0	0.0872606	0
	0.0212415	0	0.796764	0	0	0.4939
	0	0.00475334	0.616738	0	0	0.336637
	0.0307191	0.355114	0	0	0.126793	0.0357484
	0.473987	0	0	0	0	0
	0	0	0.219808	0	0	0.0634974
	0	0.119388	0.0780316	0	0.234091	0.0100935
	0	0.150525	0.34443	0	0	0.242259
	0	0	0.142046	0	0.132189	0
	0	0.175835	0.138283	0	0.624778	0
	0.342575	0	0.487232	0	1.07611	0.173397
	0	0.22651	0.202376	0	0	0.31398
	0	0	0.0528993	0.220681	0	0.163636
	0	0.191687	0.228385	0	1.23982	0.23636
	0.0506776	0.0556069	0	0	0.442263	0.0154747
	0	0.104678	0.365623	0	0.741115	0.114099
	0	0.0757272	0.0351338	0	0.679366	0
	0.371362	0.0693039	0	0	0	0
	0	0.0519776	0.377024	0	0.62907	0.421752
	0.323904	0.0167348	0.802862	0	0	0
	0.133725	0.215247	0.524637	0	0.282949	0.62797
	0.164314	0.0624946	0.301738	0	0	0.201495
	0.171739	0.13967	0.0780648	0.106538	0.541303	0.638226
	0.308492	0.0370598	0.377377	0	0.772427	0.131233
	0.235046	0.0341596	0.707771	0	0.560452	0.110898
	0.475245	0.0128618	0	0	0.00645157	0.713959
	0	0	0	0	0.51811	0.0241687
	0	0.0758873	0.371922	0	0.230357	0.14642
	0.0870953	0.0280408	0	0	0.0444955	0.424575
	0	0	0.374661	0	0.0155508	0.150098
	0	0	0	0	0.118235	0.657964
	0	0	0	0	0.638884	0
	0.151499	0.205256	0.296156	0	0.779367	0.283037
	0.398032	0.182907	0.592197	0	0.808877	0.318944
	0	0.140593	0.244955	0.24876	0.39673	0.444685
	0	0	0	0	0	0.247253
	0.356715	0.0206932	0.676525	0	0.505989	0.0706268
	0.481381	0.0110791	0.0220367	0	0	0.317153
	0	0	0	0	0	0.00451046
	0	0	0.26781	0	0.558167	0.0992096
	0	0.0503424	0.381637	0	0.5735	0
	0.704167	0.00553985	0.0165283	0	0.717809	0.524047
	0	0	0.636411	0	0	0.0782651
	0	0	0.339217	0	0.471926	0.661103
	0.374708	0.0177381	0.470827	0	0.661537	0.217842
	0	0.101751	0.404167	0	0	0.0470732
	0.431384	0	0.217882	0	0	0.62271
	0.00622897	0.0664734	0.969674	0	0.489248	0.16123
	0.0124694	0.161833	0.0686883	0	0	0.161833
	0	0.0288632	0.593429	0	0.663699	0.233928
	0.171294	0.0279157	0	0	0.567779	0
	0	0	0	0	0.286814	0.797556
	0	0.155809	0.639589	0	0	0
	0	0	0.804846	0	1.96673	0.88154
	0.357803	0	0.280632	0	0.443176	0.152411
	0.0565613	0.0399263	0	0	0.299474	0.573207
	0	0.0350987	0.212413	0	0.848058	0
	0	0.0999381	0.144003	0	0.443854	0.40772
	0	0	0.0600295	0	0	0.637597
	0	0	0.911173	0	0.538757	0.864942
	0.453212	0.197389	0.474734	0	0.940693	0.604362
	0.140082	0	0.140082	0	1.27597	0.103357
	0	0	0.161405	0	0.467902	0.108809
	0.330697	0	0	0	0.640901	0.972278
	0	0	0.652707	0	0	0.463786
	0	0.00300845	0.794905	0	0.0296848	0.860727
	0	0.0112961	0.386247	0	0	0.41291
	0	0	0.613841	0	0	0.193394
	0	0.128347	0.217344	0	0.165957	0
	0.0587949	0.0587949	0.630253	0	0	0.119711
	0.389679	0.0900173	0.253184	0	0.270244	0.506428
	0	0.105521	0.110778	0	0.514973	0.229302
	0	0.00554665	0	0	0	0.594465
	0.254655	0.231124	0.680597	0.227147	0.371582	0.395434
	0	0.288453	0.0345907	0	1.05475	0
	0	0.107873	0	0	0.443108	0.375435
	0	0	0.196387	0	0	0
	0.439627	0.0453946	0.00514681	0	0	0.0453946
	0	0	0	0	0.282332	1.47068
	0.103663	0.0861331	0	0	0	0.115181
	0.0300116	0	0	0	0.00607481	0.783076
	0.560475	0.0203801	0	0	0	0.606424
	0	0	0.0314666	0	0.783523	0.969531
	0.858329	0.141262	1.24651	0	0.00630203	0
	0.340399	0.0316762	0	0	0	0
	0	0.104745	0	0	0.751437	0
	0.269038	0	0	0	0	0.0895791
	0.176156	0.0143434	0.443794	0	0.78804	0
	0	0.579818	0	0	0	1.05824
	0.8389	0.0462131	0	0	0.339793	0.208016
	0	0	0	0	0.0839308	0.744489
	0	0	0.847422	0	1.01545	0.0344935
	0	0	0.47059	0	1.08588	0.0694394
	0	0.00491539	0.0713084	0	1.11509	0.235929
	0.484421	0	0.086538	0	0.0327601	0.0141716
	0	0.0646602	0.588651	0	0	0.337028
	0.152867	0.0593758	0.00609876	0	0	0.588553
	0	0.00540818	0	0	0.297925	0
	0	0.0325435	0.0378659	0.460201	0.119384	0.480864
	0.42842	0	0	0.398637	0.790626	0.111743
	0	0	0.686563	0	0.366705	1.09921
	0	0	0.11513	0	0.105628	0
	0.140816	0	0.48131	0	0.40717	1.13829
	0	0	0.10507	0	0.0539145	0.282326
	0.367599	0.0547115	0.919135	0	0.278044	0.155898
	0	0	0	0	0.166139	0.374979
	0	0	0.481283	0	0.562763	1.02452
	0.00516068	0	0.486158	0	0	0.278229
	0.196093	0	0.163182	0	0.107278	0.262628
	0	0	0.282165	0	0.720446	0.0641991
	0	0	0.263967	0	0.174412	0.36569
	0	0.0350198	0.435984	0	0.343493	0.531172
	0.761396	0	0.668795	0	0	0.0197386
	0.0105827	0	0.44375	0	0.0568659	0
	0.365379	0	0.142085	0	0.257769	0.308878
	0.347659	0.246129	0.133114	0	0.223614	0.0607631
	0.439369	0	0	0	0.00579086	0.511554
	0	0.0151576	0.206279	0	1.26927	0.356027
	1.2936	0	0	0	1.0535	0.873467
	0	0	0	0	0	0.895308
	0	0	0.503765	0	0.574953	0
	0	0	0.555944	0	1.14883	0.771517
	0	0	1.41615	0	0.810789	0.422769
	0.920576	0	0	0	0	0.606895
	0	0	0	0	0	0
	0.319344	0	0	0	0.741144	1.12143
	0.412283	0.278437	0.0825004	0	0.282767	0.566748
	0	0	0	0	0.0172185	0.55779
	0	0	0	0	0.00559385	0
	0	0.169449	0.755951	0	0.755951	0.416036
	0	0	0.316049	0	0.670796	0
	0	0	0	0	0.360167	0
	0	0	0	0	0	0.287583
	0	0.00537171	0	0	0.131064	0
	0.0988438	0	0	0	0.874133	0
	0.495989	0.00538148	0.38121	0	0.259883	0.126544
	0	0.123758	0	0	0.101117	0
	0.71582	0.00579354	0.00579354	0	0	0.701518
	0	0.0265937	0.00537563	0	0.571423	0.145236
	0	0.0473079	0.46133	0	0.292008	0.344852
	0	0.340713	0.262589	0.348593	0.125278	0.283747
	0	0	0.203338	0	0	0.600642
	0	0	0.430115	0	0.226301	0
	0	0	0.269388	0	0	0.0771029
	0	0.0464423	0	0	0.650656	0.905702
	0	0	0.70907	0	0.282324	0.583028
	0.332202	0.121673	0.577841	0	0.357199	0.0681943
	0	0.136193	0.444856	0	0.0998905	0.641201
	0	0	0.0325214	0	1.39184	0.490288
	0	0.175803	0.00518124	0	0.180151	0.404591
	0.414256	0	0.00575023	0	1.31269	0.920641
	0.722714	0	0	0	0.423458	0.931101
	0.282509	0	0	0	0.474916	0.156025
	0	0	0.624053	0.127528	0	0.366942
	0	0.0305695	0.816406	0	0.00516024	0.628254
	0.0180386	0.0239798	0	0	0.481732	0.714711
	0.324493	0	0.0797855	0	0	0.0252342
	0.0107645	0.0978657	0.268839	0	0.725627	0.281169
	0	0	0.136015	0	0.410411	0.496577
	0	0	0.573867	0	0.0291555	0.504875
	0.36358	0.234263	0.149342	0	0.223587	0
	0.0766784	0.0225146	0.142972	0	0.335381	0.413647
	0	0.0369419	0.708132	0	0.305653	0.391919
	0	0.0534686	0.0992617	0	0	0.325315
	0	0	0.0498449	0.339481	0.437125	0.647445
	0.511211	0.0916815	0.163503	0	0.00955577	1.27481
	0.507562	0	0.908729	0	0.26218	0.324629
	0	0	0.284237	0	0.522913	0.434791
	0	0	0.417504	0.216571	0	0.224488
	1.01441	0	0.703722	0	0	0.656469
	0.571773	0.112779	0	0	0.384141	1.16297
	0.0527661	0.102887	0	0.0781405	0	0.632964
	0.394484	0	0.605898	0	0	0.385388
	0	0	0.0229167	0	0.0319383	0.185646
	0.207163	0	0	0	1.1391	0
	0	0.0518977	0.737137	0	0.255359	0.39441
	0.13235	0.017007	0.686255	0.054247	0.368775	0.524956
	0	0.15647	0.23501	0	0.453158	0.221181
	0	0.0912952	0	0	1.68392	0
	0	0.139843	0.117085	0	0	0
	0	0	0	0	0.617795	0.557789
	0	0.0276907	0	0	0	0.0722031
	0.0230113	0.0305656	0.602332	0	0.55224	0.31942
	0	0.0272454	0.269526	0	0.446893	0.358283
	0	0.096237	0.257305	0	0.41205	0.0237677
	0	0	0.587815	0	0	1.00803
	0.913035	0.00531398	0.0915816	0	0	0
	0	0.158262	0.988108	0	0.028178	0.0447114
	0	0.0360942	0	0	0.64692	0.548397
	0	0	0.334189	0	0.00514011	0
	0	0.00487754	0.0430643	0	0.479998	0.153786
	0	0.208766	0.00492735	0	0.0195654	1.01825
	0	0	0.13632	0	0.390328	0.58648
	0.596834	0	0.241738	0	1.12594	0
	0.160331	0.0517722	0	0	0	0.36435
	0.246932	0.0491868	0.27285	0	0.116218	0.466118
	0	0	0.0988024	0	0.788468	0.0988024
	0.00507725	0.0151551	0.246828	0	0.348819	0.00507725
	0.48727	0.274847	0	0	0.504781	0
	0	0	0	0	0	0
	0	0	0.169621	0	0	0
	0.530043	0.072849	0	0	0.128364	0
	0.172446	0.00391333	0.508412	0	0.302243	0.230148
	0.00492398	0.155146	0.28572	0.0528745	0.900605	0
	0	0	0.771491	0	0.928682	0
	0	0.189707	0.886431	0	0.927396	0
	0.117791	0	0	0	0.00888956	0
	0	0	0	0	0.122795	0
	0	0.00691653	0	0	0.617174	2.00604
	0	0	0	0	1.75364	0.750707
	0.00544501	0	1.25138	0	0	0.453166
	0.413566	0.00532125	0	0	0.297734	0
	0	0.0191125	0.815672	0	1.96789	0
	0.427223	0.089456	0.306044	0	0	0.756632
	0.399914	0	0.11808	0.13507	1.50616	0
	0	0	0	0	0	0.256359
	0	0.0975174	0	0	0	0.792837
	0	0	0	0	0.227586	0.244406
	0	0.144217	0.139575	0	0.228548	0
	0	0.0384749	0.199374	0	0.537047	0.250275
	0	0	0	0	0	0
	0	0	0.088595	0	0.0985202	0.448989
	0	0.0736529	0	0	0.798826	0.942691
	0	0	0	0.216764	0.0317636	0.10702
	0	0	0	0	0.736664	0.551457
	0	0.231608	0	0.153062	0.738417	1.60835
	0	0.0546707	1.07156	0	0.973926	0
	0	0	0.471079	0	0.333193	0
[truncated: 1,628 more rows]

## Sheet: Figure 6D
cell	IKA			IKDR
	base	Drug	%	base	Drug	%
18912c4	746	305	40.8847	818	659	80.5623	500nM AmmTx3
18913c1	1237	400	32.3363	1188	1090	91.7508	500nM AmmTx3
18913c2	1441	405	28.1055	937	902	96.2647	500nM AmmTx3
18914c2	1758	300	17.0648	1541	1221	79.2343	500nM AmmTx3
ave	1295.5	352.5	29.5978	1121	968	86.953
stde	160.423	21.849	3.7429	120.821	92.2548	3.16338
cell	IKA			IKDR
	base	Drug	%	base	Drug	%
18813c1	1359	1417	104.268	995	784	78.794	2mTEA
18813c2	1695	1677	98.9381	1474	1117	75.7802	2mMTEA
18813c3	1157	1271	109.853	1304	740	56.7485	3mMTEA
18813c5	903	933	103.322	743	349	46.9717	3mMTEA
18821c1	1767	1584	89.6435	1145	709	61.9214	2mTEA
19o18c4	729	869	119.204	429	144	33.5664	10mMTEA
19o18c6	834	650	77.9376	331	203	61.3293	10mMTEA
19o18c7	678	472	69.6165	189	35	18.5185	10mMTEA
ave	1140.25	1109.12	96.5979	826.25	510.125	54.2038
stde	158.175	126.193	3.76997	144.309	130.244	6.49949

## Sheet: Figure 6E
		CGE NGFC CLUSTER				CAx PC CLUSTER
		no of cells	3626			no of cells	2530
		KCND2	KCND3			KCND2	KCND3				MEDIAN	MEDIAN
		0.682789	0.172308			0	0				KCND2	KCND3
		0.913799	0.833358			0	0
		1.19352	0.00706965			0.661946	0			CGE NGFC CLUSTER	0.339732	0.34302
		1.54742	1.15748			0	0.0101533			CAx PC CLUSTER	0.589191	0.081256
		1.4679	0.961718			1.16457	0.0773078
		0.302431	0.457884			0.494883	0.53173
		0.625919	0.267143			0.5701	0.638193
		0.802594	0.0842965			0	0.919878
		0	0			0.493307	0.333488
		0.315586	0.792608			0.0196943	0
		1.24933	0.0225691			0.38173	0.881209
		1.95005	0			0.219671	0.347656
		1.44632	0			0.640066	0
		1.49027	0.799387			0.426619	0
		0.381919	0			0.399699	0.0596094
		0.464201	1.47267			0.326095	0
		0.907147	0			0.0733495	0.190036
		0.0149006	1.39809			0	0
		0.544482	0.604517			0.728842	0
		0.206772	0.874047			0.556231	0.668228
		0.439472	0.932142			0.0554122	0
		0	0.859524			0.291185	0.710576
		0.679295	0.405736			0.838806	0
		0	0			0.462148	0.715109
		1.16535	0.263524			0.556494	0
		0.222286	0.0381577			0.710385	0.161878
		1.09105	0.00917647			1.13766	0.374437
		0	0.500187			0.172904	0
		1.30677	0.00715889			0.590617	0.0162971
		0.884392	1.26419			0.343737	0
		1.15897	0.577145			0.605025	0.768528
		0.167656	0.0662077			0.725247	0.308292
		1.32276	0			0	0
		0.274865	0.800686			0.26617	0.0556045
		1.5628	0.0271619			0.105876	0
		0	1.0644			0.34749	0
		0	0			0.160952	0.226343
		1.11005	0			0.451994	0
		0.0865614	0.811795			0.657755	0
		0	0.456262			0.685124	0
		0.0167418	1.11832			0.837247	0
		0.747532	0.430642			0.175561	0.0376647
		0.560019	0.236713			0.333962	0.0178618
		0.270807	0.712591			0.796937	0
		0.632047	0.307606			0	0
		0.113166	0.754379			0.651446	0
		0.642254	0.735787			0.572026	0
		1.13585	0.0414069			0.888453	0
		0.355068	0.777729			0.635128	0
		0.857729	0.00866618			0.280607	0
		0.729458	0.0371179			0.246701	0.751031
		0.893393	0.0211584			0.79553	0
		1.19676	1.05625			0.785601	0
		0	0.431883			0.637578	0
		0	0.704037			0.729967	0.370129
		0.721665	0			0.490203	0
		0	0.659922			1.25803	0
		0.491645	0.858968			0.298711	0
		0.208333	0.0671791			0.590299	0
		0	0			0.229414	0
		0.229138	0.0890579			0.64683	0
		0.779837	0.760654			0.414826	0
		0.166334	0.218262			0.0380116	0
		1.38059	1.0451			0.372412	0.0647095
		0	0.848409			0.463673	0.57266
		0.0168695	0			0.462578	0
		0.731551	0.25063			0.415001	0.655377
		1.54061	0.882898			0.458096	0
		0	0.0439461			0.732517	0.160624
		0.553938	0.0166804			1.13426	0.0195173
		0.205442	0.484789			0.90906	0
		0.789985	0			0.573797	0
		0.188539	0.682158			0.763962	0
		0.952127	0.0109895			1.2642	0.227815
		1.08046	1.52266			0	0.212012
		0.401573	0.512245			0	0
		0.787231	0.0433895			0.213657	0
		0.372397	0			0.400713	0
		0.00494849	0.485541			0.124369	0.217363
		0.802332	0.122084			0.597473	0
		0	0.652926			0.902574	0
		0.640438	0.562294			0.935418	0
		1.1751	0.861885			0.965184	0
		0.314365	0.283934			0	0.625171
		1.20856	0			0.81114	0
		0.228968	0.0869228			0	0.538031
		1.20837	0			0.0199669	0
		0.900165	0			0.808025	0
		0.0787902	0.0846014			0.576113	0.373208
		0.431395	1.00287			0.308766	0.192924
		0.582606	0.641194			0.224625	0
		0.419179	0.0963181			0.39612	0
		0.851141	0.269555			0.694482	0
		0.146828	0.950839			0.542576	0.387591
		0.799661	0.511664			0.0185991	0
		0.41114	0.554363			1.4126	0
		0.998275	1.26227			0.946433	0
		0.320138	0.725308			0.201105	0
		0.91792	0			0.0216127	0
		0.223591	0.0739024			0.920899	0
		0.511852	0.0169927			1.15284	0
		0	0.0998297			0.302306	0.285866
		0.918757	0.766296			0.515277	0
		0.0268865	0.516309			1.14051	0
		0.296488	0.405357			0.858584	0.491387
		0.186393	0.529892			1.05257	0
		0.511045	0.763132			0.419122	0
		0	0.472266			0.64487	0
		0.546516	1.31613			0.547267	0
		0.587842	0.011285			0.658747	0
		0.20273	1.21028			0	0
		0	1.20985			0.655462	0
		0	0.0342214			0.893962	0
		0.664025	0.693247			1.43919	0
		0.391096	0			0.352092	0
		0.884802	0.743776			0.803107	0
		1.03704	0.0175801			0.606155	0.760309
		0.121941	0.489944			0.715976	0
		0.761681	0.297864			0.584455	0
		0.707307	0.438766			0.451438	0.424159
		0.311444	0.585349			0.0932944	0
		0.20032	0.908449			0.941839	0.429919
		0.552034	0.760772			1.4639	0
		0.443132	0.0789677			0	0
		0.659747	0.093807			0.986439	0
		0.306937	0.359298			0	0.101698
		0.113117	0.395653			0	0.625958
		0.240291	0.416979			0.574611	0
		0.405353	1.52632			0	0
		0	1.14277			0.140464	0.444778
		0.342997	0.617297			0.214648	0.434472
		0.606787	0.624265			0	0.168401
		0.0755473	0.741289			0.607978	0
		0.00521154	0.40654			0.0594536	0
		0.594056	0.377068			0.250803	0.115262
		0	0.75961			0.336181	0.0208131
		1.28837	0.0687688			0.604963	0.207733
		0	0.276507			0.377674	0.0197552
		1.06362	0.502298			0.550505	0
		0	0.548714			0.445005	0
		0.36275	0.784807			1.08227	0.242065
		0.42816	0.117218			0	0.10501
		0.0144226	0.0968452			0.448416	0
		1.42008	0.858207			0	0
		0.26462	0.41272			0.504177	0
		0.130904	0.943288			0	0.679912
		0.407495	0.545216			0.450225	0
		0	0.0720262			0.694697	0
		0.422955	0.745689			0.630656	0.145172
		0.800788	1.41322			0.0813637	0
		1.0138	1.64668			0.439428	0
		0.179839	1.20109			0.748451	0
		0.628644	0.937088			0	0
		0.839438	0.916245			0	0.931594
		0.437893	0.258682			0.887623	0
		1.51077	0.799014			0	0.667526
		0.0305783	0.708469			0.407333	0
		0.716562	0.261789			0.404089	0
		0.481235	0.329564			0.156588	0.963099
		0.717786	0.432212			0.0789822	0
		0.394445	0.82986			0.0724625	0
		0	0.800459			0.151547	0
		0.501344	0.0465301			0	0.0177167
		0.58711	0.166561			0.33562	0.373761
		0.568925	0.677642			0.179075	0
		0.349843	0.694491			0.627042	0.418109
		1.00075	0.719557			0	0
		0.408316	0.926299			0.31996	0
		0.272641	0.310275			0.647477	0
		0.793162	0.760256			0.802848	0
		1.13765	0.79904			0.32859	0
		0.145261	0.95925			0.398501	0
		0.254917	0.0216769			1.05106	0
		1.25479	1.23776			1.06686	0
		0.818614	0.45108			0.61225	0
		0.929894	0.0568615			0.452827	0
		0.958563	0.190156			0.54351	0
		0.32235	0.220288			0.0260962	0.288858
		0.216616	0.661263			0.387766	0.316402
		0.329156	0.42664			0.826387	0
		0.741451	0.340214			0.346875	0
		0.0941482	0.0575456			1.39728	0
		0.22361	0.0587269			0.156445	0.372659
		0.759712	0			0.92607	0
		0.898757	0.76767			0	0
		0.352407	1.12479			0.419951	0.705954
		0.785217	0.502923			0.74259	0.312709
		0.281226	0.884894			1.32292	0
		1.28252	0.709663			0.463029	0
		0.633067	0.716487			0.982774	0
		1.42958	0.436565			0.755026	0
		0.689686	0.763547			0.443379	0
		0	0.0219324			1.20827	0
		0.656398	0.22108			1.48748	0.616386
		0.209513	0.424162			0.665759	0
		0.185811	0.0972149			0.0176026	0
		0.545418	0.323114			0.708246	0.0556673
		0.414488	0.4695			0.588319	0
		1.08194	0			0.334414	0
		0.758309	0.718277			0.825773	0
		1.26045	0.535886			0.689834	0
		0	0.805035			0.0697498	0
		0	0			0.324952	0.218606
		1.27286	0			0.0619159	0.671971
		0.65465	0.685968			0.0379361	0.481585
		0.0348099	0			0.840402	0
		0.514285	0.218754			0.310205	0
		1.18132	0.286341			0.664226	0
		0.732384	0.168934			0.493093	0
		0.98448	0.803997			1.24764	0
		0.0924327	0.499134			0.589969	0
		0.233168	0			1.00925	0
		0.406589	0.109151			0.762609	0
		0.117733	0.00622774			0.940138	0
		1.19089	1.09008			0.0892763	0.0545162
		0.0709516	1.46916			0.614661	0.367286
		0.998965	0.204747			1.10832	0
		0.233403	0.200204			1.69404	0
		0.336213	0.905501			0.509942	0
		0.0800464	0.287694			0.398483	0.17527
		0.993089	1.11932			0	0
		0.910857	0.0655875			0.0277374	0
		0.916931	0.252131			0.401721	0.23249
		1.12503	1.27506			0.353504	0
		0.31125	0.552033			0.457584	0
		0.0372598	0.241637			0.600726	0.0232544
		0.8774	0.704449			0.387132	0
		0.374406	1.37991			0.414332	0
		0.344067	0.540759			0.788854	0
		0.68647	0.597074			1.28693	0
		0	0.729123			0.653519	0
		0	0.0141415			0	0.41931
		1.06647	0.00771447			0.912229	0.588078
		0.0585367	0.866678			0.484767	0
		0.150246	0.823249			0.38633	0
		0.670829	0			0	0.681465
		0.919929	0.498181			0.299786	0.232838
		1.05018	0.477052			0.0457276	0.0231251
		0	0.788884			0.451028	0.13861
		0.372188	0.397074			0.595816	0.0399181
		0.834469	0.782789			0.509018	0.147797
		0.402836	0.787733			0.143493	0.694617
		0.423233	0.638386			0.479162	0
		0.58417	0.54869			0.697988	0.202434
		1.18247	0.152949			0.559117	0.058203
		1.59146	0.960028			0	0.476936
		0.523263	0.548407			0.688105	0.765687
		1.04311	0.87738			0	0.629497
		0	0.513475			0.233835	0
		1.15721	0.482932			0	1.04044
		0.831904	0			0.369209	0
		0.127729	0.112627			0	0.868412
		0	0			0.166816	0.32859
		0.430257	1.13255			0.0721947	0.820968
		0.413883	0.981829			0.132126	0.284869
		0.775297	1.43421			0	0.23126
		1.09709	1.14122			0.259664	0.167595
		0.00459614	0.388313			0.405052	0.372818
		0.903507	0.314995			0.135042	0.425362
		0.356269	0.447356			0	0
		0.278197	0.365759			0	0.761029
		0.255389	0.755706			0.316115	0
		0.214286	0.322382			0.209185	0.509692
		0.0694582	0.207985			0.541785	0
		0.398066	0			0.961375	0.592025
		1.11012	0.588325			0.872816	0.74657
		0.21887	0.608148			0.0512619	0
		0.550591	0			0.565402	0.200253
		0.9446	0.966424			0.0821667	0.546914
		0.078783	0			0	0.589202
		0.240671	0.265052			0.434329	0.345054
		0.0392218	0.451086			0.235338	0.378379
		0.937294	0.498393			0.511908	0.236959
		0.343752	0.495295			0.017991	0.282746
		1.162	0.614074			0.126157	0.220348
		0.990269	0.135685			0.29586	0.389808
		0.541232	0.735803			0.163022	0.111579
		0	0.303482			0.780927	0.0897752
		0.374303	0			0	0.444693
		0.569263	0			0.466221	0.25383
		0.815458	0.858829			0.360727	0.25832
		0.400414	0			0.409815	0.0785338
		1.62328	0.56476			0	0.442141
		0.669163	0.381441			0.483642	0.329989
		0.138224	0.352697			0	0
		0.874349	0			0.0699125	0
		0.751109	0.457252			0.42301	0.312611
		0.648016	0			0.478548	0.444918
		0.0416768	0.682502			0.398409	0.858489
		0.333198	1.14599			0.376473	0.338866
		0.513443	0.688424			0.368044	0.200859
		0.0546893	0			0	0
		0.0833414	0.527861			0.231927	0.321849
		0.500577	0.35985			0.482113	0.245064
		0.689183	0			0.300887	0.263061
		1.17374	0.134841			0.218173	0.321538
		1.34009	0.0139986			0.0504617	0.289993
		0.860897	0.0799648			0.191858	0.100523
		1.54661	0.124809			0.453486	0
		0.92413	0.118866			0	0.231866
		0.203148	0.338417			0.284994	0.329095
		0.6581	0.724205			0.026083	0.295308
		1.17547	0			0.818102	0.0400329
		0	0.640412			0.0251764	0.477415
		1.06525	0.0705862			0.0565698	0.11011
		0.0272339	0.162707			0	0.478512
		0.441773	0.103768			0.072759	0.282953
		0.48832	0.37316			0.311513	0.0874359
		0.474183	1.08032			0.12806	0.151816
		0	0			0	0.291791
		1.06573	0.752374			0.528155	0.0833988
		0.673355	0			0.208114	0.0687662
		0.00478994	0.665715			0.36099	0.14082
		1.41425	0.79615			0.634267	0.960238
		0.372574	0			0	0.483428
		0.532867	0.322725			0.196193	0.807123
		0.703303	0.321026			0.40912	0.803525
		0.75514	0.294754			0.258785	0.359902
		0.010386	0.202503			0.353635	0.174714
		0.378247	0.374352			0.713198	0.49403
		0.715995	0.196825			0.395384	0.224309
		0.821765	0.385171			0.318103	0.020593
		0.0535729	0.0821405			0.438472	0.152808
		0.26679	0.896495			0.688	0.185457
		1.13861	0.635758			0.656775	0
		0	0.251038			0.205101	0.623297
		0.0264543	0.636579			0.817837	0.280001
		0.867268	0.0150008			0.911764	0
		0.484785	0.109149			0.489128	0.405708
		0.246816	0.588142			0.457834	0.119574
		0.348269	0.637583			0.463968	0.318956
		1.09934	0.883467			0.930804	1.1065
		0.528234	0.0811677			0.557309	0.684355
		0.410076	0.477459			0	0.0412966
		0.499639	0.337008			0.950443	0.791185
		0.455958	0			0.246663	0.73042
		0.717194	1.69422			0.149102	0.23743
		0	0.288343			0.817052	0.435502
		0.0075325	0.625675			0.599551	0.636441
		0.887531	0.577485			0.919501	0.0275438
		0.332084	0.457338			0.679394	0.444232
		1.04801	0.269863			0.716921	0.56554
		0.483874	0.322995			0.276152	0.221038
		0.399018	0.0999153			0	0.365474
		0	0.926453			0.246091	0.710004
		0.760973	0.672402			0.315486	0.226172
		0.850885	0.810317			0.767936	0.601702
		0.795771	0.143828			0.217998	0.114927
		0	0			0.150076	0.409462
		0.578038	0.393653			0.147761	0.851059
		0.101863	0.198938			0.0378749	0.0191167
		0	0.0817602			0.103468	0
		1.0941	0.0886192			0.322674	0
		0.759965	0			0.771791	0.0688198
		0.532178	0.66001			0.223498	0.389229
		0.469481	0.00493955			0.456477	0.155918
		0.585845	0.321712			0.0695175	0.271522
		0.883265	0			0	0.500339
		0.041571	0.342563			0.537308	0.804007
		0.978373	0.867823			0.086481	0.554294
		0.474655	0.193453			0	0.182566
		0	0.251906			0.343955	0.283985
		0.866401	0.0347317			0.078766	0.357845
		1.60315	0.00585366			0.328432	0.245067
		1.28714	0.433165			0.217272	0.177431
		0.506236	0.7223			0.29652	0.535087
		0.232073	0.0903678			0.191589	0.430177
		0.184657	1.06807			0.585975	0.377566
		0.969453	0.496362			0.243643	0.59136
		0.136158	0.617916			0.613197	0.259447
		0.751886	0.779806			0.494463	0
		0.758098	0.568487			0.586226	0.0626341
		0.906103	0.509497			0.364805	0.485873
		0.345463	0.596208			0.203245	0.283534
		0	0.40524			0.478146	0.0478816
		0.754534	0.420604			0.244452	0
		0.725498	0.159987			0.358896	0.223111
		0.388911	0.628114			0.400236	0.277567
		0.539854	0.0737087			0.620243	0.191001
		1.02141	0			0	0.369969
		0.258072	0.0645359			0.866854	0.642866
		0.635465	0.315929			0.475268	0.196637
		0	0.921538			0.10474	0.184352
		0.407925	0.211696			0.177989	0
		0.69416	0.880635			0.181679	0.112916
		0	0			0.273264	0
		0.54492	1.00401			0.308089	0.349102
		0.341236	0.102962			0.619519	0
		0	0			0.812619	0.480731
		0.214615	0.22965			0	0.223131
		0.528251	1.11594			0	0.259984
		0.725272	0			0.430906	0
		0.041386	1.39856			0.152327	0.33805
		0.00644318	0.450331			0	0.375905
		1.01855	0.85582			0.691139	0.886091
		0.0928027	0.0447462			0.0863679	0
		0	0			0.842167	0
		0	0.852765			0.586643	0.558513
		1.71091	0.463877			0.359364	0.147827
		1.50916	1.01826			0.164007	0.0944124
		0.531977	0.704463			0.423217	0.325712
		0.103258	0			0	0.361848
		0.501799	0.412722			0.301682	0.389615
		0.961124	0.637716			0.145836	0.075574
		0	0.898708			0.468002	0.214079
		0.380171	0			0	0.363989
		0.256327	0.437176			0.335696	0.335696
		0.906591	0			0.216442	0.698405
		0.871303	0.165229			0.326863	0
		0.316066	0.106605			0.212235	0.140162
		0.877054	0.417017			0.368942	0.29624
		0	0.401133			0.245664	0.454575
		0.862569	0			0.404823	0.258422
		0.422079	0.583412			0.674218	0.409
		0.00475408	0			0.114125	0.586615
		0.613695	0.65698			0.0501361	0
		0.271769	0.50283			0.541274	0.762963
		0.99476	1.12342			0.968489	0
		0	0.338207			0.411005	0
		0.670728	1.35745			0.440534	0
		1.09576	1.11295			0	0.533729
		1.02086	0.19422			0.369981	0.0818357
		0	0.862165			0.570073	0.557581
		0	0.481712			0	0.888964
		0	1.11966			0.388701	0.213119
		0.683491	0.639085			0.0264641	0.299086
		0.742176	0.878638			0.203921	0.423831
		0.83604	0.504354			0.331268	0.0242494
		0.647064	0.337401			0.500501	0.0813251
		1.00548	0.284272			0.48574	0
		0.460902	0.181991			0.521274	0.604742
		0.388524	0.26185			0.0251066	0.185147
		0.149253	0.838844			0.482601	0.108735
		0.0460934	0.192499			0.367254	0.510213
		0.24265	0			0.0221766	0.852482
		0.671376	0			1.45239	0.589167
		0.807719	1.05813			0.148755	0.113589
		0	0			0.396786	0.0382231
		0.434859	0.876391			0.0953296	0
		0.10053	0.404511			0.84528	0
		0.8677	0.182379			0.480804	0
		0.857742	0.0708277			0.831171	0.403529
		1.04818	0.249496			0.75053	0.0181639
		0	0.634946			0	0.405677
		1.28149	0.370103			0.218184	0.078138
		0.00435147	0.352776			1.11081	0.127327
		0.133752	0.613676			0.62055	0.39367
		0.328071	0			0.365169	0.192451
		0.0258153	0.345851			0.451974	0
		0.314321	0.460693			0.154027	0.08848
		0.856075	0.236398			0.719625	0.306524
		0.0049282	0.216786			0.203023	0.313603
		0.532554	0.0112793			0.159331	0.612174
		0.428787	0.0488253			0.280284	0.296448
		0.558926	0.493983			0.22833	0
		0.574809	0.481284			0.282232	0.223812
		1.1135	0.662938			0.261562	0
		0.59098	0.64457			0.0916296	0
		0.291618	0.416601			0.326334	0.369359
		0.485119	0.361173			0.727097	0
		0	0			0.760226	0
		0.377935	0.797254			0.557132	0.316874
		0.334042	0.0264447			0.340084	0.462062
		0.283129	0.777129			0.660476	1.22884
		0.766613	0.435921			0.447642	0
		0	0			0.169415	0.137751
		0.349191	0.20926			1.13119	0
		0.213568	0.604795			0	0
		0.00490706	0.96256			0.160641	0.779837
		0.621658	0.725328			0.538415	0.402354
		0.418895	0.408779			0.389011	0.247633
		0.935417	0.0468292			0.0200969	0.0966738
		0.237589	0.241228			0.706381	0.177063
		0.0290816	0.390717			0	0.393066
		0.540363	0.580524			0.999289	1.12239
		0.531486	0			0.687447	0.0195797
		0.389363	0.134277			0.506369	0.041653
		0.875142	0.546308			0.690536	0.375653
		0.658049	0.781394			0.214408	0.0390811
		0.574381	0.15305			0.752479	0
		0.447438	0.0469079			0.522237	0.0822473
		0.48036	0			0.329593	0
		0.109671	0.32161			0.457708	0.151218
		0.418251	1.13096			0.551444	0.0550531
		0.284645	0.734475			0	0.273811
		0.603724	0.902272			0.701555	0.21452
		0.346309	0.732813			0.13737	0.415668
		0.567742	0.791169			0.259669	0
		0.534045	0.612756			0.280845	0.208319
		0.988439	0			0.358923	0.431609
		0.304172	0.469021			0.343893	0.178516
		0.18758	0.379258			0.170759	0.238199
		0.653748	0.783069			0.373783	0.566584
		0.98739	0.692634			0.255293	0.103517
		0.730754	0.578954			0.289467	0.155171
		0.873164	0			0.850413	0.265962
		0.320698	0.476953			0.602926	0
		0.843223	0.42982			0.294379	0
		0.102954	0.292751			0.549798	0.402263
		0	0.790347			0.224876	0.267125
		0.0052442	1.22463			0.178027	0.359782
		0.830393	0.514995			0.496008	0.466614
		0.574013	0.430143			0	0.553713
		0.55008	0.204472			0.347551	0.157018
		0	0.469577			0.323886	0.222038
		0.58251	0.563268			0.267221	0.191117
		0.409656	0.180584			0.296481	0.255127
		0.567079	0.777115			0.140804	0.503918
		0.928138	0.0535338			0.196157	0.421165
		1.01328	0.152941			0.295377	0.142129
		0.0336251	0.0241328			0.124539	0
		0	0.700287			0.0853613	0.413688
		0	0.261995			0.456956	0.500456
		0.941067	0.480362			0.41545	0.28877
		0.12702	0.0552429			0.172632	0.186943
		0	0.268011			0.262442	0.598988
		0.44371	0.566754			0.455094	0.341329
		0.382284	0			0.287865	0.287865
		0	0.232689			0.160197	0.0833028
		0.0982886	1.07482			0.435677	0.0216053
		0.815058	0.516246			0.372255	0.212074
		0.836403	0.0295599			0.101202	0.577174
		1.14053	0.307823			0.3057	0.357037
		0.0570827	0.533519			0.357483	0
		0.616324	0.182735			0.101896	0.84285
		0.511175	0.351033			1.0179	0.0236027
		0.415089	0.422216			0.631184	0.619978
		1.02307	0.0272907			0.316517	0.796861
		0.510264	0.314248			0.476558	0.663316
		0.772791	0.43736			0.673274	0.341053
		0.936448	0.656606			0.307907	1.17813
		0.618947	0.360503			0.139624	0.400342
		0.148586	0.429909			0.89395	0.704768
		0.244158	0.244158			0.341522	0.725703
		1.77944	0.587963			0.675639	0.393827
		0.770917	0.739066			0	0
		0.486439	1.00865			0.566532	0.544103
		0	0.26567			0.552232	0.169136
		0.276504	0.90749			1.17087	0.0238948
		0.758343	0.298235			0.683903	0.662598
		0.2946	0.536495			1.42016	0.471264
		0.916898	0.56005			0.39972	0.211088
		0	0			0.602191	0.379181
		0	0			0.702189	0.419317
		0.821784	0.429608			0.0418111	0.293848
		0	0.105391			0.511231	0.773735
		0.879946	0.227621			0.972784	0.479031
		0.675713	0.257605			0.702467	0.482485
		0.679628	0.226396			0.641146	0.713746
		0.14265	0.00463549			0.554577	0.519452
		0.560652	0			0.514887	0.412701
		0	1.31312			0.267694	0.0595788
		0.785005	0.207394			0	0.782771
		0.728026	0.913443			0	0
		0.271259	0.314435			0.379777	0.0190654
		0.0915435	0.282121			0.177773	0.383171
		0.448638	1.43629			0.271339	0
		0.56797	0			0.398853	0.319915
		0.362967	0.791043			0.235206	0.235206
		0	0.306175			0.576968	0
		0.494771	0.678853			0.63058	0.3012
		1.3485	0.438911			0.555022	0
		1.03636	0.517265			0.442365	0.669777
		0.524224	0.216237			0.533106	0.135392
		0.0386002	0.53555			0.599258	0.498752
		0.345283	0.0951663			0.454738	0.216278
		1.04793	0			0.545591	0.613328
		0	0.393977			0.209375	0.299631
		0.307826	0.892759			0.207772	0.543292
		0.687178	0			0	0.363975
		1.11711	0			0.123212	0.759125
		0.873626	0.126806			0.195225	0.402691
		0	0.205818			0.20307	0.313673
		0.139111	0			0.586001	0.647426
		0	0.0190365			1.01376	0.930765
		0.902692	0.0829908			0.310555	0.0589262
		0.258333	0.939784			0.557113	0.627781
		0.0150605	0.0347946			0.775234	0
		0	0.801416			0.071494	0.554527
		0.046241	0.609208			0.795594	0.0440437
		0.186317	1.12459			0.370489	0
		0.612981	0.165863			0.500693	0.0207466
		0.28243	0.289858			0.070577	0.363784
		0.810936	0.535307			0.43441	0
		1.24794	0.403219			0.208102	0.449694
		0	0.801537			0.285598	0.62028
		0.703692	0.46772			0.17439	0.900426
		0.812538	0.384258			0	0.380993
		0.648715	0			0.498222	0.650558
		0.119216	0.0223576			0.845912	1.10948
		0	0.00443654			0.128525	0.392059
		1.02693	0.419824			0.0212957	0.387661
		0.0215456	0.779526			0.797884	0.453014
		0.411507	0			0.726384	0
		0.0652748	0.0309925			0.646195	0.37441
		0.014486	0.708591			0.614325	0
		0.472526	0			0.766344	0.903443
		0.245969	0.504491			0.935216	0.421498
		0.456703	0.269829			0	0.792491
		0	0			0.560958	0.294144
		0.446459	0.307151			0.586098	0.845126
		0.402155	0.49351			0.898825	0.220661
		0	0.237091			0.920401	0.518576
		0.523011	0.0222059			0.246217	0
		0	0			0.693182	0
		1.31719	1.00242			0.470895	0.0986629
		0.164652	0.776529			0.388695	0.166339
		0.304516	0.200882			0.395387	0.162415
		0.10142	0.55801			0.392676	0.182647
		0.109445	0.567943			0.523583	0
		0.375448	0.0795912			0	0
		0.473496	0.301842			0.553874	0
		0.735106	0.0236671			0.0202235	0.0400461
		0	0			0.38951	0.164324
		0.338243	0			1.05666	0.776097
		1.11638	0.626273			0.324595	0.257152
		0.643117	0.764165			0.749632	0.217961
		0.482298	0.355633			0.35212	0.0613884
		0.391132	0.557848			0.418068	0.359435
		0	0.605199			0.836464	0.0752011
		0	0.732701			0.221746	0.377282
		1.05712	1.07335			0.441126	0.116193
		0.123924	0			0.588464	0.144786
		0.393437	0.242175			0.89038	0.0869935
		0	0			0.589433	0.471393
		0.59771	0			0.991085	0
		0.869128	0.226788			0	0.691654
		0	0.888189			0.698549	0.342621
		0.860622	0.366168			1.0141	0.387822
		0	0.296885			0.743883	0
		0.400558	0.231123			0.620661	0.233352
		0.639409	0.123385			0.546082	0
		0.648775	0.320542			0.0758049	0.359865
		0.532945	0.022892			0.637761	0.138637
		0.359701	0.258634			0.401949	0
		1.06694	1.24155			0.296717	0.628662
		0.727534	0.935941			0.74118	0.462174
		0.177131	0			0.479054	0.479054
		0	0.499234			0.408573	0.278505
		0.557664	0.869836			0.691467	0.122215
		0.652946	0.135194			0.687736	0.168931
		0	0.044996			0.249807	0.382679
		0	0.497302			0	0.402407
		0.119735	0.374512			0.32316	0.777603
		0.382318	0.419444			0.144856	0.398701
		0.596875	0			0.635614	0.381362
		0.916766	0.524376			0.321212	0.517513
		0.363174	0.476057			0.210752	0.0932649
		1.11859	0.561197			0.368994	0.368994
		0	0.964597			0.549182	0
		0.0444906	0.731831			0.500736	0
		0.148718	0.897948			0.0444842	0
		0.586663	0.504746			1.36523	0.48771
		0.468919	0.0828212			0.535963	0.391827
		0.701134	1.05215			0.446742	0.412382
		0.96895	0.169744			0.746967	0
		1.17352	1.20729			0.653445	0.548142
		0	1.01939			0.359527	0.159616
		0.518269	0.538094			0	0.301919
		0.339026	0.895646			1.09447	0
		0.546389	0			1.44303	0.259187
		0.722257	0.398718			1.02742	0
		0.322272	0.342039			1.67022	0
		0.235126	0.132229			0.423117	0.363898
		0	0.187474			0.351208	0.104152
		0.550639	0.231708			0.857431	0.129281
		0.467661	0.209307			0.817402	0
		0.437392	0.706064			0.102144	0.372722
		1.07314	0.693982			0.521361	0
		0.136428	0.850115			0.702531	0.904898
		0.982821	0			1.09562	0.179928
		0.879463	0			0.581995	0
		0.536069	0			0.595465	0.860034
		0.564934	0.165746			0.0552185	0.173313
		0.735414	0			1.03367	0
		0.320918	0.367022			1.00009	0.0348203
		0.571307	0.0147101			1.30117	0
		0.373784	0.253812			0.946049	0
		0.100165	0.278847			0.787765	0.0474435
		0.0293159	0.753557			0.907089	0.921887
		0.539822	0.143365			0.336285	0.365903
		0	0.272715			0.696884	0.130119
		0.402129	0.264815			0.639656	0.60903
		0.811087	0.0484597			0.405765	0.495048
		0.0672359	0.104466			0.407978	0
		0.413856	0.0455502			0.613804	0.330116
		1.17674	0.2201			0.151699	0.684539
		0.0927347	0			0.794452	0.350034
		0.590762	0.62023			0.328131	0.260046
		0.858399	0.351106			0	0.652823
		0.83204	0.860875			0.80313	0.585562
		0	0.166683			0.446977	0.117996
		0	0.465736			0.158162	0
		0.145009	0.00622258			0.669364	0
		0.240891	0.899658			0.287316	0.0205894
		0	0			0.518054	0
		0.470233	0.832504			0.476944	0.922103
		0	0.932906			0	0.261924
		0.987773	0.339799			0.358109	1.0606
		0.658442	0.675436			0	0
		0.455899	0.790299			0.154712	0.497974
		1.56639	0.650021			0.459193	0.510458
		0.112482	0.671969			0.923908	0.184443
		0	0.58395			0.242371	0.392019
		0.70081	0			0.0518081	0
		0.00568023	0.990221			1.08912	1.27384
		0	1.07839			0.554746	0.174061
		0.260567	0.6514			0.558545	0.0148517
		0.02271	0.247938			1.04671	0.922371
		1.16189	0.449635			0.262678	1.14435
		0.231282	0.694987			0.670999	0
		0.248121	0.304542			0.227102	0
		0.212824	0.476593			0	0.729729
		0.6824	0.408025			1.06361	0.482904
		0.808753	1.0544			1.21901	1.0225
		0	0.271497			0.129305	0
		0.644967	0.746203			1.52126	0.718982
		0	0.0100558			0.431749	0
		0.471523	0.0138066			0.100846	0.119849
		1.04869	0.448743			0.618889	0.455811
		0.500655	0.586596			0	0.300531
		0	0.0397495			0.692269	0.996527
		0.653453	0.283512			0.144866	0
		0.0423354	0.557307			0.225707	0.306537
		0	1.08356			0.980965	0.806734
		0	0.749705			0.885118	0
		0.0261257	0			0.36285	0
		0.705375	0.385591			0.89151	0.822264
		0.285952	0.843339			0.820883	0.142869
		0.866284	0.372607			0.6061	0
		0	0.604238			0.716221	0.616017
		0.715407	0.360894			0.764244	0.638987
		0.736354	0.0184326			0.618655	0.720567
		0.936116	0.509411			1.29881	0.485029
		1.60283	0.0196169			0.684119	0
		0.259729	0			0.811024	0.206368
		0	0.0132036			0.437424	0.448103
		0	0			0	0.382141
		0.873165	0.569954			0.245075	0
		0.282587	0.457029			0.460458	0.215756
		0.980186	0.0106502			0.98075	0.455971
		0.110529	0.00506839			0.541885	0.614288
		0.763263	0			0.383782	0.296977
		0	0			0.729508	0.390256
		0.192987	0.757923			0.247799	0.109562
		0.17841	0.17841			0.697922	0.959545
		0	0.851944			1.45066	0.86989
		0.04719	0.445023			0.450879	0
		0	0.048858			0.33381	0
		0	0			0.49154	0.234687
		0.147173	1.00945			0.0365382	0.686208
		0	0.568444			0	0.794511
		0.0728604	0.456138			0.352243	0.32719
		0.848087	0			0.0539508	0.0713064
		0.380509	1.04464			0.285355	0.269717
		0.26667	0.304257			0.787162	0.0721551
		0	0.0307319			0.619117	0.463347
		0.838407	0.036672			0	0
		0.408313	0.622121			0.12416	0.518716
		0.38025	0.599293			0	0.583131
		0.540143	0			0.325125	0.353924
		0.460246	0.181872			0.60903	0.476187
		0	0			0.304141	0.337775
		0.379055	0.554852			0.596344	0.41189
		0.503034	0.692453			0.845837	0.58665
		0	0.964809			0.3794	0.320281
		0	0.541826			0	0
		1.00101	0.963674			0.860289	1.01288
		1.19091	0.61828			1.12564	0.318304
		0.2026	0.752789			0.843034	0.177827
		0	0.222952			0.304885	0.061007
		0.546962	0.219608			0.77402	0
		0	0			1.1363	0.357257
		0.963767	0.734288			0	0.365023
		0.441922	0.555411			0.288712	0.674108
		0.51782	0.553047			0.166463	0.30913
		0.469357	0.304531			0.336861	0.402736
		0.495444	1.18218			0.943619	0.79243
		0.424199	0.676915			0	0.415814
		0.656393	0.60653			0	0.644698
		1.26199	1.3448			1.25731	0
		0.0463711	0.852807			0.310262	0.349494
		0.441827	0.51762			0.3285	0.538218
		0.386306	0.298398			0.741284	0.456301
		1.00628	0.84312			0.0854768	0
		0.878706	0.795619			0.0730956	0.14121
		0.250666	0.364515			0.795554	0.715421
		0.263119	0.275222			0.0180389	0.135946
		0.484779	0.0181812			0.0573657	0.273758
		0.129017	0.239545			0.567885	0.139046
		0.363764	0.175846			0.453795	0.324147
		0.202783	0.690216			0.554173	0.191919
		0.627332	0.696075			0.168644	0.462371
		0.577775	0.317039			0.395179	0.359577
		0	0.388802			0.52131	0.615244
		0.634967	0.354855			0.586423	0.60685
		0.470846	1.02389			1.13813	0.148771
		0	0.550899			0.356174	0.310185
		0.468027	0.374274			0.923557	0.507519
		1.16583	0.0891444			0.555118	0.528961
		0.39927	0.551644			0.345843	0.470622
		0.370218	0.00480618			0	0
		0	0.76928			0.796055	0.316914
		0	0.316399			0.623323	0.372504
		1.00855	0.976918			1.1127	0
		0.381788	1.28377			0.566908	0.162147
		0	0.105728			0.73965	0.654842
		0.966864	0.663959			0.502856	0.594346
		0.480059	0.0094349			0.967926	0
		0.402324	0.681228			0.373958	0.315559
		0.204867	0.62365			0.509663	0.135763
		0.0822611	0.664301			0.418333	0.216048
		0.00478293	0.138566			1.11645	0
		0	0.127688			0.491608	0.837062
		0.0127142	0.803176			0.527049	0.485221
		0.641593	0.860553			0.363545	0.69827
		1.15978	0.00588356			0.418135	0.40705
		0.228071	1.0503			0.168813	0.357043
		0	0.252208			0.231408	0.0583501
		0.532412	0.846992			0.360961	0.291255
		0.980023	0.00514008			0.29022	0.698216
		0.258506	0.746807			0.951194	0.159305
		0.771876	1.00903			0.806134	0
		0	0			0.1623	1.07183
		0.686386	0			1.15495	0.0512568
		1.16756	0.294812			0.885612	0.0190666
		0.477491	0.429637			0.32999	0
		0.696426	0			1.16162	0
		1.08245	0.0512866			1.44335	0
		0.901895	0.2139			1.12219	0
		1.18253	0.713032			1.45738	0.14292
		0.575547	0.437175			0.930603	0
		0.757308	0.829087			0.870926	0
		0.731426	0.0404361			0.73427	0
		0	0.754766			1.25169	0
		0.0863015	0.706822			0.838642	0
		0.103492	0			0.983891	0
		0.301759	0			1.10083	0
		0.174867	0.320015			0.838102	0
		0.0203907	0.484369			0.93066	0
		0.114939	0.855283			1.2214	0.147956
		0.743861	0.0552699			0.747483	0
		0.221398	0.336994			1.1041	0
		0.88322	0.388231			0.773945	0
		0	0.392443			0.634996	0
		1.23023	0			1.51679	0
		0.937214	0.523241			1.79917	0
		0.108406	0.302354			1.07942	0
		0.423731	0.671089			1.29915	0
		0	0.107076			0.667546	0.0352013
		0.042273	0			0.651047	0.230155
		0.998547	0.558203			0.32495	0
		0.568459	0.168671			0.262084	0.039174
		0.00632418	0			0.282258	0.0956235
		0.852131	0.42545			0.523461	0.533857
		0.79115	0.0226676			0.592272	0.0174147
		0.859665	0.747408			0.116109	0.517096
		0.259072	0.336946			0.27762	0.44768
		0.678207	0.00506746			1.13888	0.504815
		0.303022	0			1.25386	0
		0.300086	0.014477			0.54161	0.38753
		0.137168	0.248516			0.328254	0.193672
		0.883982	0.250777			0.305204	0.571067
		0.757615	0.11752			1.20694	0.304967
		0	0.442711			0.120749	0
		0.382929	0.23095			0.689163	0.261969
		1.03551	0.0975922			1.14335	0
		0	0.611761			0.342207	0.354728
		0	0.385653			0.607114	0
		0.948251	0.401539			0.565906	0
		0.401771	0.378573			1.28519	0
		0.766624	0.841324			1.09732	0
		0	0.279763			1.05139	0
		0	0			1.07492	0
		0.816997	0.28836			1.13585	0
		0.589021	0.871012			0.521594	0
		0.00446142	0			1.04195	0
		0.576403	0.164216			1.58876	0
		0.185296	0.493772			0.105885	0
		0.30006	0.325652			1.04551	0
		0.732707	0.211792			1.1089	0
		0.274434	0.170595			1.56402	0
		0.513028	0.151251			0.838301	0
		0	0.521929			0.958918	0
		0.790607	0.0168847			0.550564	0
		0.0401206	0.101143			1.65849	0
		0.655599	0.167758			0.781324	0
		0.417117	0.417117			1.01134	0
		0.00865638	0			1.44905	0
		0.230826	0.0808493			1.18777	0
		0.0100969	0.423762			0.48839	0
		0.592113	0.712826			1.11872	0
		0.380969	0.47537			1.57741	0
		0.0343149	0.0836756			0.690391	0
		0.546656	0.790176			0.541895	0.171963
		0.852136	0.763346			0.671001	0.48051
		0.280837	0.235895			0.807687	0.522522
		0.982642	0.162954			0.879981	0
		0.580174	1.07766			0	0.744911
		0.417953	0.760541			0.160928	0.299512
		0.33753	0.0619151			0.0478222	0
		0.767681	0.0161334			0.690633	0.176116
		0	0			0.661735	0.201609
		0.447104	0.651822			0.654797	0.499153
		0.743884	0.448354			0.448763	0.158394
		0.811778	0.205077			0.176708	0.339423
		0	0			0.647839	0.0677597
		0.0273359	0			0.0866379	0.595818
		0.260975	0.22194			0.0893209	0.24709
		0	0.153136			1.2644	0
		0.150031	0.312549			0.591319	0
		0.0807543	0.782977			0.61667	0.259751
		0.417271	0			1.17509	0
		0.146281	0.406865			1.2453	0
		0.980699	0.939171			1.25555	0
		0	0			0.47894	0
		0.181572	0.084791			0.573821	0
		0.677021	0.888288			1.09974	0
		0.175399	0.344179			0.432775	0
		0.0541777	0.348924			1.11875	0.304058
		0	0			0.97905	0
		0	0.638489			1.70452	0
		0.809369	0.384191			0.795933	0
		0.846834	0.0522582			0.786321	0
		0.0688834	0.371054			0.834649	0
		0.79882	0.336536			1.27375	0
		0.10482	0.605688			0.408695	0
		0.906753	0.0948771			1.10484	0
		0.961143	0.432687			0.330953	0
		0.906798	0			0.918248	0
		0	0.200552			0.415112	0.966747
		0	0.69131			0.958843	0.47799
		0.578675	0.66568			0.911476	0
		0.622535	0.21628			0.695256	0.456604
		0.320663	0.0852147			0.263111	0
		0.345952	0.505357			0.434257	0.171376
		0.850269	0.00952787			0.391391	0.0914914
		0.258517	1.16707			0.318396	0.0783531
		0	0.680625			0.534796	0.77028
		0.0666404	1.09553			0.824067	0.123756
		0.542988	0.688924			0.799329	0.596654
		0.541026	0.391036			0.792926	0.70768
		0.696315	1.04082			0.61752	0.371882
		0.32567	0.589942			0.658234	0.323916
		0	0.506775			0	0.397319
		0	0			0.520552	0.305821
		0.294105	0			0.482677	0.140111
		0.40143	1.0475			0.651404	0.306976
		1.0409	0.00864389			0.185402	0.639899
		0.789145	0.591518			0.365879	0.523079
		1.1369	0.0918779			0.278952	0
		0	0			0.43297	0.686577
		0	0			1.2865	0
		0.0367895	0.295291			0.271901	0
		0	0			0.467528	0
		0.372634	0.246189			0.602324	0
		0.207424	0.214602			0.410774	0
		1.01181	0.970253			0.439197	0.0826538
		0.350325	0.194978			0.323988	0
		0.333172	0			0.564615	0
		0	0.00677665			1.3351	0
		0	0.0381042			1.25497	0
		0.275329	0			1.68828	0
		0.112161	0.0539102			1.05252	0
		0.689677	0.361152			0.427265	0
		0.657108	0.277946			0.942481	0
		0.496043	0.321712			0.883976	0
		0.226543	0			0.766876	0
		0.30916	0.177123			1.25884	0
		0.92087	0.454763			0.24771	0
		0.321719	0			0.888944	0
		0.54262	0			1.48494	0
		0.566059	0.975825			1.46021	0.0907771
		0.325942	0.0329582			0.690254	0
		0.72005	0.684935			1.16844	0
		0	0.44301			0.720917	0.0190237
		0.524294	0.155558			1.34147	0.414473
		0.339791	0.659789			0.40257	0.0945215
		0.980522	0.49794			0.665348	0.196061
		0.248662	0.41291			0.94008	0
		0.169355	0.998991			0.800695	0
		0	0.906792			0.231091	0
		0.493682	0			0.468041	0.175506
		0	0.186681			0.599977	0.468674
		0.116284	0.775416			0.779414	0
		0	0.371415			0.761193	0
		0.580695	0.987654			1.23251	0
		0.737738	0			1.01442	0
		0	0.144886			0.645719	0
		0.831456	0.586024			0.022248	0.022248
		0.0452244	0.00768086			0.959206	0.111859
		0.491777	0			0.673256	0.305921
		0.240274	0.801882			0.712568	0.204841
		0.590025	0.552964			0.255812	0
		0.5905	0.376119			0.605395	0.108635
		0.479741	0.365706			0.572089	0.333179
		0	0.879493			1.24016	0
		0.826689	0.526809			1.19482	0
		0.854391	0.964799			1.22716	0
		0.0643948	0.322765			0.964951	0
		0.314191	0			0.878954	0
		0	0			0.360395	0
		0.550889	0.515701			0.411152	0
		0.19557	0.313355			0.661715	0
		0.0973415	0.177518			1.17006	0
		0.234959	0.117029			0.573442	0.529932
		0.442336	0			0.95399	0.0918016
		0.0237045	0.6008			0.422782	0
		0.264113	0.379783			0.0686396	0
		0.645624	0.442126			0.528	0
		0.34107	0.306773			1.19524	0
		0	0.0974409			0.825507	0
		0.913222	0.328164			1.06845	0
		0	0.158759			1.21815	0
		0.582366	0.346078			0.422927	0.543134
		0.0161145	0.386015			1.08984	0
		0.85695	0.482187			1.22279	0
		0.049367	0.943432			0.971149	0
		0.564773	0.397406			0.489882	0.0784085
		0.56839	0.938811			0.264872	0.486581
		1.15899	0			0.247663	0
		0.0677848	0.495448			0.49541	0.221699
		0.179232	0.425272			0.38695	0.111649
		0	0.496452			0.542777	0.629474
		0.561699	0.66375			0.776256	0.523952
		0.6201	0.0273363			0.182343	0.0152695
		0.0364479	0.555267			0.923865	0.433406
		0.711933	0.311078			0	0.450491
		0.893237	0.0502525			0.27877	0.547393
		0.668615	0.744816			0.845888	0
		0.186547	0.835108			0.699735	0.651092
		0.0667119	0.230082			0.400141	0.12592
		0.451969	0			1.25665	0
		0.0616835	0.00792175			0.255081	0.279789
		0.552999	0.910645			0.701115	0.32648
		0	0.68094			0.673528	0
		0.161694	0			0.316197	0.170544
		0.14403	0.932393			0.855652	0
		0.207565	0.702516			0.403124	0
		0.249382	0.350081			0.680316	0.201571
		0.0113885	0.467243			1.4939	0
		0.123569	0.170322			1.44894	0
		0.769386	0.777609			1.02801	0
		0.524357	0.256769			0.744989	0
		0	0			1.1482	0
		0	1.24412			0.866551	0
		0	0			1.11845	0
		0.590805	0.935672			1.02568	0
		0.860834	0			1.12502	0
		0.257992	0.484452			1.07543	0
		0.673214	0.0284787			0.376107	0.294498
		0.373898	0.317488			0.184363	0.368382
		0.165626	0			1.42074	0.566026
		0.294404	1.00364			0.626503	0.368563
		0.217504	0.300349			0.0930755	0
		0.0975201	0.0923447			0.490147	0
		0.471012	0.00560682			0.683605	0.386851
		0	0.345397			0.415221	0.326443
		1.23456	0.779182			0.095972	0.645298
		0.149912	1.01779			0.187668	0.12894
		0.123541	0			0.0628994	0
		0.745167	1.07018			0.58895	0.535165
		0.0921167	0.296649			0.282517	0.151202
		0	0.161979			0.161688	0.508609
		0.300413	0.28143			0.582634	0.537472
		0	0			0.782319	0
		0.370272	0.415645			0	0
		0.243867	0.0707109			0.873895	0
		0.346006	0.508377			1.25735	0.152381
		0.475022	0.275204			0.539315	0
		0.49292	0.00868939			0.541637	0
		0.369246	1.07057			0.349436	0
		0	0.246977			1.08536	0
		0	0.736707			0.714048	0
		0.415422	0.265543			0.551517	0
		0.0714989	0.138225			0.710324	0
		0.367528	0.0050923			0.891157	0
		0.292632	0.668191			1.14018	0
		0.242287	0.829629			1.17716	0
		0.662788	1.46589			0.903883	0
		0.0229408	0.294376			1.13945	0
		0.850873	0.973045			0.211811	0.166762
		0	0.360202			0.527451	0
		0.388827	0.747112			0.799554	0
		0.0468435	0.87162			0.928379	0.488682
		0.975716	1.27297			1.12968	0
		0	0			0.855513	0
		0.282125	0.134355			0.924961	0.232994
		0.24963	0.119191			0.307864	0.148618
		0.0596454	0.138482			0.609246	0
		0.523945	0.430817			0	0.464725
		0.325473	0.101016			1.16316	0
		0.765572	0.654621			0.46809	0
		0.422792	0.229134			1.20057	0
		0.274224	0.506957			0.968961	0
		0.257463	0.554517			1.11777	0
		0.495128	0.00503227			0.272511	0.434429
		0.394148	0.010562			0.238474	0.0561056
		0.230027	0.102344			0.162764	0
		0.196543	0.498429			0.723271	0.325133
		0.164753	0.331364			0.526778	0
		1.23678	0.59266			0.547552	0
		0.548737	0.458122			0.251043	0
		0	0.47217			0.191175	0.191175
		1.37721	0.00693323			1.50129	0
		0.15414	0.53386			1.09855	0
		0.773964	0.192623			1.61915	0
		0	0.470001			1.05364	0
		0.0172516	0			0.181475	0
		0.149967	0.08056			0.0362569	0
		0.798421	0.36494			1.22272	0
		0.602193	0.264601			1.16891	0
		0.453784	0.562812			1.13478	0.231977
		1.03921	0.564936			0.477694	0
		0.665145	0.269163			0.368567	0.0415679
		0.899371	0.247169			0.627447	0
		0.263063	0.952946			0.835975	0.266188
		0.774341	0			0.905655	0
		0.89621	0			0.170831	0
		0.0305748	0.24641			0.792267	0.175472
		0	0.400375			1.01956	0
		0.452427	0.0875892			0	0.0878128
		0.406466	0.570836			0.65037	0
		0.272511	0.227794			0.365461	0.104625
		1.3291	0.148634			0.0908228	0.0188365
		0.336139	0.167752			0.188084	0.0898968
		0	0.222441			1.32065	0.252222
		0.010622	0.143962			0.3969	0.460362
		0.197491	0.141175			0.243414	0
		0.747753	0			0	0.563983
		0.776918	0			0.550872	0
		0.903153	0.437522			0.86397	0
		1.26054	1.27532			0.512767	0.1919
		0.0346089	0.637691			0.76392	0.833846
		0.214897	0.345828			0.602172	0.537744
		0.517523	0			0.969811	0
		1.42182	0			0.994379	0
		0	0.564203			1.00339	0.466895
		1.32412	0.147408			1.18466	0
		0.641961	0.476362			1.05144	0
		0.283508	1.25378			1.17011	0
		0	0.737551			0.858199	0
		0.626192	0			0.602417	0
		0.395442	0.707402			1.09719	0
		0.140018	0.184252			0.971975	0
		0.683725	0.0248488			1.67208	0
		0	0.840125			0.415126	0
		0.693126	1.42463			0.989601	0
		0.518738	1.07688			0	0.650048
		0.911267	0.148037			1.56611	0.571029
		0.0426306	0.306975			0.0227012	0.243361
		0.0646953	0.732188			0.308792	0.324299
		0.00987163	0.708889			0.652434	0
		0	0			0.0385341	0
		0.0456186	0.485783			1.32459	0.173669
		0	0.388182			0.943057	0.269793
		0.418155	0.507768			1.04395	0
		0.371766	0.0947786			0.384448	0.677454
		0	0.147242			0.536586	0
		0.192267	0.459312			0.728323	0.294841
		0.22197	0.820471			1.29087	0.638656
		1.03698	0.0337758			0.852951	0.223986
		0.539032	1.24622			0.336259	0
		0.0376362	0.867404			1.16698	0
		0	0.320263			0	0.416566
		0	0.511199			0.599361	0.30523
		0	0.227256			0.0210121	0.723541
		0.0145454	0			1.01729	0
		0.774294	0.234758			0.879278	0
		0.522891	0.297422			0.910004	0
		0.005932	0.237231			0.856635	0
		0.175653	0.146813			1.23506	0
		0.366947	0.813165			0.582412	0
		0.441384	0.425608			0.65012	0
		0.984279	0.22249			1.26244	0.100374
		0.270958	0.534398			1.04481	0
		0.525669	0.329395			0.611242	0
		0	0.0118263			0.575566	0
		0.231788	0.0215048			0.249249	0
		0.579526	0.433538			0.576423	0
		0.360195	0			0.0443887	0.519287
		0.401545	0.0833115			0.484002	0
		0.549341	0.709936			1.00614	0
		0.295667	0.305991			0.170761	0.649252
		0.729401	0.684192			0.470339	0
		0.341895	0			0.501728	0
		0.663236	1.45497			0.465459	0
		0	0.137138			0.738647	0.159219
		0.803168	0.288444			0.717195	0
		0.174152	0.235213			1.04954	0
		0.872375	0.764474			1.30074	0.0905276
		0.532738	0.0163559			0	0.108068
		0.116305	0.6011			0.0890404	0.186375
		0.174432	0.00575825			0.663585	0
		0	0.565644			1.79236	0
		0.982347	0			0.574409	0
		0	0.405931			0.831305	0
		0.0841457	0.310654			0	0
		0.231306	0.166004			0.843121	0
		0.105326	0.935337			1.20397	0
		0	0.424035			0.463455	0
		0	0.86099			0.242103	0
		0	0.340522			1.2137	0
		0.341891	0.495415			1.55075	0
		0.00536494	0.28378			0.169606	0
		0.227676	1.02782			1.41935	0
		0.948857	0.00502797			0.717172	0
		0	0.0475378			0.912924	0
		0.333138	0.0383029			0.864015	0
		0.55108	0.0410213			1.19156	0
		0.00378212	0.00378212			0.828977	0
		0.572219	0.429804			0.391209	0
		0.541619	0.324257			0.229817	0
		0.478742	0.093391			0.298405	0
		0.364533	0			1.08932	0
		0.360683	0.836991			0.185999	0.401468
		0.0850217	0			0.447764	0
		0.0124525	0.463057			0.575704	0
		0.320386	0.631178			0.355574	0.0349649
		0.204945	0.357425			1.06864	0
		0.625014	0.093759			0.0162489	0
		0.569629	0			1.46843	0
		0.122056	0			0.502028	0.5353
		0.618217	0.146592			0.63487	0.900395
		0.312435	0.590372			0.0318306	0
		0.412692	0			0.565086	0
		0	0.205248			0.899559	0
		0.363494	0.689934			1.1646	0
		0.0547701	0.45312			0.033955	0.334461
		0.373155	0.416255			1.07412	0.353739
		0.375543	0.542836			0.641509	0
		0.426994	0			0.843851	0
		0.240462	0.245097			1.03134	0.227453
		0	0.218821			0.14102	0
		1.17641	0.661699			1.12842	0
		0.0685411	0.416657			0.662026	0
		0.0369759	0.243912			1.11503	0.0776041
		0.169606	0.193323			1.12993	0.0486865
		0.264169	0.230442			0	0.375305
		0.601328	0.450214			0.423001	0
		0.407869	0.789593			0	0.373161
		0	0.932136			0.0728046	0.0728046
		0.462375	0.264677			0.832215	0
		0.936361	0.52425			0.278858	0.176448
		0	0.907029			0.135277	0.495609
		0.426037	0.459057			0.440291	0
		0.262467	0.78429			0.88725	0
		0.858866	0.179681			0.978921	0
		0.005568	0.173819			0.718231	0.115279
		0.726982	1.13552			0.504035	0
		0.471274	0.693785			0	0.0507373
		0.343972	0.310143			0.563976	0
		0.118626	0.102517			0.17981	0
		0.313796	0.09376			0.465161	0
		0.343775	0.569807			0	0
		0.469457	0			0.295329	0.604474
		0.518123	0.385535			0	0.0482878
		0.134073	0			1.04476	0
		0.568803	0.169836			0	0.442664
		0.391141	0			0.38938	0.164263
		0.845099	1.01222			0.774632	0.300799
		1.10604	0			0	0.277117
		0	0			1.13667	0
		1.29861	0.57884			1.30414	0
		0.573023	0.570111			0	0.12853
		1.20702	0.254115			0.213565	0
		0.223336	0.422747			1.20696	0.141396
		0.120394	0.0620076			1.18881	0
		0.479909	0.754284			0.970635	0
		0.992736	0.738318			1.28359	0
		0.867742	0.1392			0.809274	0
		0.0317992	0.657797			0.881086	0
		0	0.929686			0.572386	0
		0.025673	0.297686			0.776081	0
		0.475417	0			1.38435	0
		0.32328	0.0471796			1.18144	0
		0.398725	0.016564			1.16834	0
		0.673664	0.165125			0.975949	0.0834547
		0.579118	0			0.760643	0
		0.0283125	0.401413			1.46443	0
		0.746482	0.369773			1.40685	0
		0.463094	0.0564066			0.908793	0
		0.752197	0			0.793309	0
		0	0.730007			1.02734	0
		0.680085	0.00533763			1.17585	0
		0.521287	0.632468			1.34043	0
		0.384836	0.45814			1.27469	0
		0.16904	0.741949			0.837889	0
		0.154829	0.18901			1.19913	0.133305
		0.202991	0.970003			1.05422	0
		0.710892	0.625153			1.11655	0
		0.0863758	0.205544			0.552047	0
		0.318221	0.0182592			0.922271	0
		0.157357	0.837139			1.06208	0
		0.242439	0.558608			1.40829	0
		0.463515	0.305882			1.04477	0
		0.841563	1.0018			0.940422	0
		0.202368	0.13797			0.906422	0.539629
		0.58183	0.252331			0.999975	0
		0.151515	0.536959			1.03195	0
		0.47945	0.23896			0.293797	0
		0	0.0152835			1.16516	0
		0.56293	0.549387			1.28836	0
		0.908122	0.210211			1.45489	0
		1.45002	1.40809			1.52029	0
		0	0.709798			0.558244	0.299275
		0.860307	0.294725			0.873956	0.443755
		0.0804888	0.344627			0.188165	0.243764
		0	0			1.09955	0.597931
		0.499298	0.13038			0.549296	0.0902574
		0.00610583	1.11771			0.899645	0.235249
		0.00605	0.172371			0.372764	0.609194
		0	0.0466588			0.590559	0
		0.212391	0.123016			0.667274	0.458874
		0.524208	0.035366			0.466854	0.197338
		0.439705	0.631524			0.196245	0.21585
		0.523539	0			0.46623	0.0483118
		0.448116	0.0614331			0.504143	0.273587
		0.554718	0.516863			0.501587	0
		0.934396	0			1.06118	0
		0	0.0188021			1.06692	0
		0	0.405029			0.786951	0
		0.564772	0.402379			0.867449	0
		0.515983	1.05941			1.03436	0
		0.655376	0.0138268			0.689976	0
		0.430737	0.222742			1.02902	0
		0.976257	0.428393			0.890675	0
		0.867161	0.24166			0.626792	0
		0.174548	0.113396			0.34418	0
		0.540788	0.102547			1.17274	0
		0.204116	0.573051			0.801167	0
		0.187515	0.765047			1.14849	0
		0	0.0647406			0.552108	0
		0.0766693	0			1.07066	0
		0.581535	0			0.916533	0
		0	0			0.720919	0.682124
		0.123074	0.164321			0.582634	0
		0.891021	0.578669			1.40571	0
		0.357502	0.0561232			0.578903	0.138317
		0.176336	0.129802			1.35063	0.556123
		1.13075	0			1.37908	0
		0.124462	0			1.01347	0.232906
		0.553982	0.292376			0.688803	0
		0	0.410646			0.839656	0
		0.467065	0.21685			1.13068	0
		1.0007	0.178957			0.74003	0.102061
		0.79296	0.171748			0.537168	0.184974
		0	0			1.00553	1.04834
		0.491068	0.109606			0.492019	0.389818
		1.12352	0.0438679			0.718164	0.474401
		0.764863	0.560804			0.610072	0.310045
		0.661378	1.27362			0.678867	0.0846455
		0	0			0.40991	0.126734
		1.15811	0.504976			0.300653	0.929993
		0.841558	0.970092			0.65734	0.0811319
		0.612237	0.970185			1.09234	0.553002
		0.563054	0.822053			0.768944	0.277106
		0.786378	0.510713			0.0261116	0.424685
		0.406338	0.304368			0.833888	0.637785
		0.318548	0.29089			0.566309	0.110819
		0.565542	0.277153			0.84614	0
		0	0.168076			1.37933	0
		0.29456	0.268271			0.4364	0
		0.196942	0.192573			0.829009	0
		0.401745	0			0.764508	0
		1.17447	0.395243			1.47452	0
		0.417492	0.172993			0.908661	0
		0.231439	0.963722			0.584165	0.139866
		1.07137	0.582955			0.282755	0
		0.682072	0.971306			0.893566	0.077158
		0.385044	0.593435			0.705954	0
		0.99276	0.588111			0.982995	0.0822863
		0.236891	1.08956			1.16739	0
		0.28167	0.220443			0.0555327	0
		0	1.12271			1.12926	0
		0.605985	0			0.903501	0
		0.673217	0.401776			1.06528	0
		0.620136	0.147979			1.11546	0.819629
		0.14917	0.72785			1.20806	0.0722311
		0.149629	0.429239			0.264394	0
		0.134916	0.776736			0.622365	0
		0	0.485496			1.02446	0
		0.508027	0.706453			0.504471	0.487096
		1.15325	0.458368			0.86127	0.223514
		0	0.511043			0.211391	0.830592
		0.360614	0.425725			0.22327	0.13013
		0.448997	0.429142			0.750754	0.369796
		0.761804	0.582612			0.280268	0.177385
		0.343615	0.920046			0.871872	0.442474
		0.731223	0.237448			0.385863	0.415896
		0.52321	0.488962			1.15666	0
		1.16931	1.15315			0.878724	0.755999
		0.211558	0.00534031			0.111527	0.373129
		0	0.365503			0.868975	0.113675
		0.0421432	0.494397			0.537292	0.56655
		0.791079	0.132308			0.295842	0.459063
		0.538394	0.12139			0.559783	0.521226
		0.957803	0.553395			1.39142	0
		1.19239	0.996741			0.699391	0
		0.22987	0.204507			1.04833	0
		0.271449	0.0723935			1.05418	0
		0.048972	0.223907			1.09735	0.0908073
		1.29943	0.549304			0.960838	0
		0	2.0056			0.847397	0
		0.837279	0.987787			1.02867	0
		1.09829	0.992943			1.32215	0.223251
		0.0903065	0.115386			1.09507	0
		0	0.36558			0.0673075	0
		1.23546	0.466711			0.91614	0
		0.589872	0.233727			0.950049	0
		0.462126	0.805915			1.53955	0
		0	0			0.655074	0
		0.786783	0.575595			1.13834	0.105856
		0.641468	1.19995			0.314191	0
		0.796992	0			0.814094	0.459743
		0.128989	0.390205			0.991113	0
		0	1.69525			1.28063	0
		0.483682	0.652375			0.566721	0
		0.852084	0.721489			0.68044	0
		0.842104	0			0.472922	0.747922
		0.512723	0.187394			1.4787	0
		0.915937	0.0136596			0.554691	0.331106
		0.698457	0.7243			0.648884	0
		0.587842	0			0.479609	0
		0.850697	0.212443			0.822041	0
		0.354985	0.0904822			0.380758	0
		0.409737	0.281496			1.50796	0
		0.548098	1.08518			0.735242	0.574197
		0.052644	0.376008			0.236161	0.182141
		0.710356	0.507863			0	0.452553
		0.0232858	0.0572282			0.282798	0.235511
		0.369084	0.0156328			0.740067	0.0204697
		1.25468	0.966233			0.795384	0
		0.0438957	0.351141			0.486883	0.435298
		0.695802	0.183207			0.541927	0
		0	0.309102			0.945512	0.504338
		0.375142	0.107777			0.836051	0
		0.005848	0.136826			0.942524	0
		0.495894	0.634873			1.11903	0
		0.440156	0.167812			1.03277	0
		0.289981	0.124447			0.935634	0
		0.918622	0.142098			1.01674	0
		0	0.0421071			1.10994	0
		0	0.255156			1.10813	0
		0.207707	0.729349			0.810995	0.373382
		1.37211	1.26667			0.891289	0
		0.651461	0.353365			1.01402	0.442755
		0.0128027	0			0.966695	0
		1.05047	0.770165			0.950115	0
		0.436325	0.0675009			0.830555	0
		0.0197321	0.118859			0.643044	0
		0.327338	0.897705			0.564958	0
		0.397006	0.019307			0.877012	0
		0	0			0.521882	0
		0.307027	0.849292			1.04762	0
		0.945523	0.0133647			1.05655	0
		1.55567	0.706084			0.893243	0
		0.13763	0.57609			0.525503	0
		1.01295	0.387835			1.07345	0
		0.260061	0			1.0944	0
		0.597643	0.269134			1.10704	0.366257
		0.579156	0.453938			1.02873	0.507328
		1.03474	0.506679			0.437959	0.396177
		0.69724	0.865376			0.705471	0
		0.309872	0.0711134			1.35667	0
		0.912032	0.464661			1.15735	0.471738
		0.604298	0.600604			0.399026	0
		0.754031	0			0.691793	0.636301
		0.734682	0.424097			0.178274	0.448489
		0.469152	0.43711			0.688381	0.122508
		1.03447	0			1.09238	0.415016
		0.70038	1.35858			0.985695	0
		0.0278119	0.503374			0.0462459	0
		0.534239	0.707692			0.664494	0
		0.433031	0.5094			0.703008	0
		0.542356	0.0120291			0.861033	0.0998874
		0.687385	0.102546			1.03862	0
		0.0506291	0			0.7741	0.246436
		0.910928	1.07034			0.978018	0
		0.171983	0.721317			0.616464	0.166662
		0.195578	0.372712			0.481503	0
		0.265084	0.0997183			0.68036	0
		0.0488542	0.390974			0.346945	0.319932
		0.023187	0.0402311			0.295541	0.840749
		0.264451	0.241329			0.564979	0.0203168
		0.553127	0.186988			0.606385	0.261833
		0.631957	0.435029			0.137671	0.0712031
		0.433034	0.453902			0.855328	0
		0.0702039	0.951504			0.15529	0
		0.884267	0			0.38321	0.615139
		0.0109194	0.45166			0	0.515067
		0	0.011786			0.698299	0.463331
		0	0.236539			0.0351642	0.594008
		0.30109	0.967739			0.774953	0.0641517
		0	0.775774			0.715242	0.219784
		0.344021	0			0.0407382	0
		0.575461	0.459614			0.687227	0.225847
		0.26632	0			0.259115	0.565646
		0	0.169269			0.685443	0
		0.585036	0			0.263345	0.231989
		0.741428	0.640936			0.112787	0.261198
		0.806167	0.0237792			0.370584	0
		0.551245	0.774463			0.962072	0
		0.471813	0.73207			0.995069	0.387699
		0.709162	0.655531			0.59384	0
		0.0369273	0.140171			0.742485	0
		0.217196	0.864856			0.869657	0
		0.0621688	0.272758			1.27934	0
		0.436713	0.340304			0.336695	0
		0.186415	0			0.565125	0
		0.541553	0.35712			0.62684	0
		0.886641	0.221443			1.02368	0
		0.200762	0.696481			0.753606	0
		0.805463	0.656639			0.883772	0.201425
		0.321324	0.268729			1.08869	0
		0.56242	0.115641			0.634223	0.196283
		0.0958967	0.344817			0.399881	0
		0.481123	0.163605			0.649903	0
		0.939056	0.439797			1.14597	0
		0.129744	0.0161671			0.517792	0
		0.512407	0.340112			1.06377	0
		0	0.187948			0.788589	0.0582826
		0.66091	0.133093			0.718638	0.408651
		0.606988	0			0.551212	0.904506
		0.717665	0.107922			1.01354	0.0776141
		0.811456	0.387307			0.104153	0.152424
		0.339234	0			1.12621	0
		0.291556	0.46427			1.02888	0
		0.678966	0.68212			0.0804977	0.737041
		0.0431883	0.23492			0.496793	0.116661
		0.472777	0.100416			0.493632	0.308718
		0.714178	0			0.193298	0.286466
		0	0.176594			0.442756	0
		0.434241	0.725671			1.25876	0
		0	0.104008			0.73971	0
		0.143239	0.255338			0.687849	0
		0.243949	0.588066			0.71897	0
		0.943475	0			0.482213	0.506596
		0	0.570732			0.642293	0
		0.516754	0.564619			0.231959	0.205741
		0	0.683472			0.672363	0.590806
		0.382034	0.113251			0.507879	0
		0	0.53085			0.0985153	0.760265
		0.996317	0			0.831262	0.201703
		0	0			0.285892	0
		0	0.275355			0.661552	0.0361162
		0.576173	0.60797			0.383019	0.224186
		0.227968	0.846931			0.463925	0.147495
		0.267871	0.366824			0.460247	0.264712
		1.2875	0			0.382462	0.975234
		0.595812	0			0.550303	0.266771
		0.928655	0.919353			0.530101	0
		0.499854	0.562634			0.523372	0.243012
		0.534821	0			0.92767	0.519792
		0.449083	0.232734			0.399763	0
		0.360588	0.953249			0.509903	0.371523
		1.06253	0.407765			0.243374	0
		0.611647	0.604994			0.625237	0.412032
		0.130545	0.582334			0.798796	0.485519
		0.770913	0			0.533733	0
		0.897735	0.128546			0.356416	0
		0	0.396107			0.945226	0
		0.00645064	0.59631			0.883497	0
		0.624698	0.753121			0.327869	0.0925807
		0.654142	0.428078			1.1282	0
		0.0733374	0			1.00992	0
		0.97139	0.20291			1.19886	0
		0.0485369	0.918071			1.25356	0
		0.955724	1.11932			1.37397	0
		1.17034	0.303266			0.475052	0
		0.652723	0.369902			1.14617	0
		0.88651	0.49927			0.839983	0
		0.201378	0.0938734			1.22086	0
		0.433288	0			0.74491	0
		0.136252	0.35392			0.344235	0
		0.650033	0.111817			1.38309	0
		0.803527	0			0.96808	0
		0.599419	0.233617			0.912034	0.0618762
		0.605827	0.376287			0.739705	0
		1.21232	0.666271			0.388938	0
		0.983347	0.527979			1.21169	0
		0.534175	0.357013			0.959167	0
		0.89451	0.852093			1.19922	0
		0.858763	0.293872			0.67608	0
		0.739748	0.315298			1.35931	0
		0.747303	0.568851			1.20997	0.345324
		0.051952	0			0.996818	0
		1.09163	1.02496			0.652772	0.0439402
		0.207938	0.73892			0.937105	0
		0.991402	0.00567184			0.905834	0
		0.00550815	0.557128			0.380668	0.716559
		0.177778	0.320635			0.701309	0
		0.736251	0.313682			0.366237	0
		0.680494	1.14244			0.504274	0.223736
		0.772583	0.730303			0.214807	0.661925
		0.0913891	0.955603			0.931614	0.325448
		0.701651	0.387169			0.35791	0
		0.16809	0.0215568			0	1.05735
		0	0			0.440018	0
		1.14344	0.588299			0.964902	0.150532
		0.00526517	0			1.03287	0.3185
		1.45437	0.028332			0.557382	0
		0.652204	0.0526911			0.308911	0.38751
		0.392326	0.421693			0.751863	0
		0.336114	0.0208082			0.349106	0.164715
		0	1.21255			0.775031	0.186794
		0	0.260003			0.326739	0.223183
		0.417706	0.300913			0.0518677	0
		1.21441	0.412027			1.28311	0.37595
		0.83823	0.109561			0.395682	0.264955
		0.487765	0.434713			1.1203	0.881533
		0.758065	0			1.21742	0
		0.29548	0.650617			0.644194	0
		0.299529	0.0192155			0.256586	0
		0.805324	0.714335			0.961251	0
		0.790786	0.815526			1.01992	0.295021
		0.710008	1.36159			0.783827	0
		0	0			1.13186	0
		0.445394	0.706144			0.281092	0
		0.0045603	0.857602			1.03655	0
		0.560679	0.120081			0.414886	0
		0.599671	0.751339			1.30682	0.240219
		0.7884	1.21251			1.43459	0
		0.544006	0.0385871			1.10168	0.0837498
		0	0.741238			1.18532	0.325729
		0	0.455689			1.05603	0
		0.590833	0.590833			1.15005	0
		0.432731	0.219202			0.474342	0.10468
		1.32438	0.222519			1.48942	0
		0.925495	0.0429982			1.06393	0
		0.270138	0.640689			0.871808	0
		0.615958	0.717285			0.538973	0
		0.76351	0.96602			0.759255	0
		0	0			0.2463	0
		0.483199	0.328067			0.423724	0
		0.503823	0			1.05119	0.486793
		0.724725	0.478679			0.935378	0
		0.0698755	0.0623483			1.14656	0
		0.0382695	0.312403			0.804569	0
		0.680674	0.973133			0.822596	0.138011
		0.419877	0.0224324			0.239881	0
		0.93733	0.0621492			0.816744	0.541746
		0.930647	1.01106			0.441378	0.153969
		0	0.0918889			0.513863	0
		0	0.00663101			0.534906	0
		0	0.265633			0.883605	0
		0.251741	0.235118			0.877494	0
		0	0			0.886568	0.221652
		0.932113	0			0.500952	0.375147
		0.82777	1.21515			1.08511	0.714805
		0.871616	0.559945			0.69315	0
		0.543845	0.788314			0.797384	0
		0.599972	0			1.32412	0
		0.621265	0.261529			0.924092	0
		0.285096	0.267473			0.789756	0
		0.0676363	0.855115			0.405086	0
		0.410937	0.33952			0.806675	0.0972668
		0.277999	0.114166			0.979735	0
		1.05274	0			0.821329	0
		0.813093	0.464771			0.600735	0
		1.17845	0.227356			0.864163	0
		0.982648	0.160774			1.0775	0
		0.84675	0.345996			1.07348	0
		0	0.783024			1.09298	0
		0.91584	0.827941			0.545155	0
		1.19174	0.395867			1.32428	0
		0.00481233	0.593559			0.943867	0.151879
		0.302232	0.610565			0.438918	0.187836
		0.905138	0			0.825391	0.282264
		0.572454	0.32448			1.06327	0.056979
		0.62246	0.141833			0.0678228	0.806373
		0.0416029	0.552791			0.701302	0.643666
		0.717783	0.785959			1.10342	0.679299
		0.453896	0.0168771			1.03903	0.303148
		0.124468	0.619859			1.02205	0.667179
		0.961289	0.474395			0.318244	0.725115
		1.31746	1.13952			0.154388	0.544313
		0.919219	0.332641			0.919644	0.0850111
		0.0557885	0.577946			0.700564	0.692407
		0.747834	0.322311			0.242729	0.749558
		0.699218	0.682062			0.741665	0.0755995
		0.0166536	0.276926			0.77569	0.543072
		0.718727	0.317921			0.506029	0.0369484
		0.250844	0.712271			0.64508	0.27282
		0	0			0.92814	0.250063
		0.98428	0			0.989571	0.334078
		0	0.263825			0.0177891	0.293428
		0.598404	0.223667			0.194574	0.386993
		0.715758	0.0069474			0.460434	0.687153
		1.3966	0.858774			0.815067	0.345868
		0	0.233429			0.69268	0.457082
		0.592992	0.481368			0.652242	0.388493
		0.837482	0.369155			0.964217	0.594082
		0.225813	0.00601383			0.750361	0.498475
		0.1594	0.338768			0.758443	0.366335
		0.326259	0			0.96616	0
		0.497114	0.855639			0.210188	0.531646
		1.11424	0.674865			0.449679	0.584968
		0.341191	0.43632			0.480568	0.787408
		0.402958	0			0.412035	0.0657736
		0	0.260874			0.835153	0.178795
		0.116002	0.262453			0.639262	0.639262
		0.460805	0.163414			0.513138	0.324369
		0.00467533	0.0502644			0.690673	0.529839
		0.631252	0.930254			0.622001	0.0811869
		0.539556	0.453038			0.297734	0.335632
		0.628012	0.929568			0.731462	0.949534
		0.0435791	0.0244447			0.756792	0.542324
		0.0344849	0.834303			0.200078	0
		0.680648	0.358531			0.254729	0.390576
		0.341885	0.605507			0.514349	0.603087
		0.594392	0.17456			0.724845	0.274595
		0.0465271	0			0.59021	0.212348
		0.366841	0.498107			0.823366	0.453322
		0	0.581173			0.465372	0.489095
		0	0.270162			0.659651	0.216386
		0.701109	0.248827			1.53138	0.143846
		0.00559843	0.0331299			0.396031	0.119347
		0.839225	0.0789598			0.870968	0.355892
		0	0			0.82985	0.267146
		0.0612457	0			0.831474	0.125876
		0	0			0.463008	0.601243
		0.114061	0.160144			0.603747	0.289329
		0	0.238996			0.367492	0.523762
		0	0.640195			0.823598	0.0178494
		0.938607	0.00527997			0.559928	0.0408512
		1.12786	0.405036			1.15499	0
		0	0.391597			0.491184	0.474881
		0.944252	0.543664			0.392503	0.806322
		0.361992	0.446868			0.977745	0.45495
		0	0.204213			0	0.0745902
		0.81886	0.0943843			0.551391	0
		0.465096	0			0.476992	0.245162
		0.560335	0			0.805871	0
		0.554802	0.033528			0	0
		0.741251	0			1.05384	0.0366915
		0.961708	0.0508207			1.29804	0
		0.567144	0.707392			1.23714	0.0561664
		0.504668	0			1.30216	0.358429
		0	0.0482597			1.21448	0
		0	0.363286			0.964492	0.441057
		0.630825	0.595364			0.613739	0.545968
		0.544867	0.276034			0.726277	0
		0	0.828295			0.292924	0.507216
		0.52161	0.339031			0.94796	0
		0.327381	0.120084			0.434774	0.39324
		0	0.229801			0.170568	0.633076
		0.0294951	0.484052			0.650592	0
		1.04887	0.0155932			0.8598	0.330949
		1.43413	0.919571			0.851566	0
		1.11868	0.370762			0.926847	0
		0.396034	0.294119			0.684074	0.349411
		0.301791	0.512836			0.358655	0.203735
		0.0223833	0.620661			1.27728	0
		0.445275	0.426834			0	0
		0.889296	0.75672			0.748391	0
		0.450833	0.682291			0.688497	0.119093
		0.594235	0.483203			0.16294	0.38656
		0.0241487	0.0477279			0.949924	0
		0	0.264528			0.583601	0.201213
		0.54132	0.395407			0.873977	0.21512
		0.496986	1.31801			0.543871	0
		0.549122	0.167997			0.43157	0
		0.919428	0.293998			0	0.369742
		0	0			0.95815	0.516754
		0	0.214568			1.0311	0
		1.05658	0.440097			1.26024	0
		0	0			1.05341	0
		0.683326	0.309027			1.31122	0
		0.836089	0.203412			1.55883	0
		0.0872606	0			1.42011	0
		0	0.4939			0.174358	0.209297
		0	0.336637			0.547115	0
		0.126793	0.0357484			0.412847	0.283006
		0	0			0.116629	0.116629
		0	0.0634974			1.16475	0
		0.234091	0.0100935			0.344646	0.344646
		0	0.242259			0.413419	0
		0.132189	0			0.198241	0.581837
		0.624778	0			0.772219	0
		1.07611	0.173397			0.324117	0.578307
		0	0.31398			0.870095	0.227554
		0	0.163636			0.509027	0.0193317
		1.23982	0.23636			0.532165	0.0732117
		0.442263	0.0154747			0.930884	0
		0.741115	0.114099			0.931354	0
		0.679366	0			0.173063	0
		0	0			0.93581	0
		0.62907	0.421752			1.05479	0
		0	0			0.63705	0
		0.282949	0.62797			0.70338	0
		0	0.201495			0.484812	0.394064
		0.541303	0.638226			0.790857	0
		0.772427	0.131233			0.822378	0
		0.560452	0.110898			0.362665	0.0579028
		0.00645157	0.713959			0.186595	0
		0.51811	0.0241687			0.564278	0.343466
		0.230357	0.14642			1.15969	0
		0.0444955	0.424575			0.725594	0.381954
		0.0155508	0.150098			1.05001	0
		0.118235	0.657964			0.645471	0
		0.638884	0			0.515854	0
		0.779367	0.283037			1.19768	0
		0.808877	0.318944			0	0.667116
		0.39673	0.444685			1.30802	0
		0	0.247253			0.933527	0.857604
		0.505989	0.0706268			1.29152	0
		0	0.317153			0.581673	0
		0	0.00451046			1.19588	0
		0.558167	0.0992096			1.40271	0
		0.5735	0			0.561085	0.394605
		0.717809	0.524047			0.886631	0.279306
		0	0.0782651			0.411141	0.0193704
		0.471926	0.661103			0.832339	0.738901
		0.661537	0.217842			0.0987964	0.153705
		0	0.0470732			0.941744	0
		0	0.62271			0.253424	0
		0.489248	0.16123			0.2466	0.481972
		0	0.161833			0.792313	0
		0.663699	0.233928			0.351273	0.208218
		0.567779	0			0.682056	0.123673
		0.286814	0.797556			0.347324	0
		0	0			0.795008	0.542955
		1.96673	0.88154			0.579549	0.160839
		0.443176	0.152411			0.690547	0.222104
		0.299474	0.573207			0.308496	0.293639
		0.848058	0			1.37515	0
		0.443854	0.40772			0.926882	0.112397
		0	0.637597			1.09908	0
		0.538757	0.864942			1.35418	0.33192
		0.940693	0.604362			0.668612	0.147202
		1.27597	0.103357			0.863701	0.498111
		0.467902	0.108809			1.11281	0
		0.640901	0.972278			0.0510909	0.130838
		0	0.463786			1.30676	0
		0.0296848	0.860727			1.06232	0
		0	0.41291			0	0.633938
		0	0.193394			0.320365	0.172957
		0.165957	0			0.515733	0
		0	0.119711			1.01993	0
		0.270244	0.506428			0.335195	0.07663
		0.514973	0.229302			0.888929	0.221219
		0	0.594465			0.218443	0
		0.371582	0.395434			0.349279	0.62909
		1.05475	0			1.25517	0
		0.443108	0.375435			1.19585	0.158811
		0	0			1.35048	0.0172843
		0	0.0453946			0.958384	0
		0.282332	1.47068			0.991358	0
		0	0.115181			1.03088	0
		0.00607481	0.783076			1.03582	0
		0	0.606424			1.27357	0
		0.783523	0.969531			1.08345	0
		0.00630203	0			0.959629	0
		0	0			1.44959	0
		0.751437	0			1.44249	0
		0	0.0895791			0.3054	0
		0.78804	0			0.790362	0
		0	1.05824			1.35279	0
		0.339793	0.208016			0.33439	0
		0.0839308	0.744489			0.689161	0
		1.01545	0.0344935			1.01767	0
		1.08588	0.0694394			0.908596	0
		1.11509	0.235929			1.47766	0
		0.0327601	0.0141716			1.4583	0
		0	0.337028			1.30538	0
		0	0.588553			0.572038	0
		0.297925	0			0.661767	0
		0.119384	0.480864			0.908983	0
		0.790626	0.111743			0.91839	0
		0.366705	1.09921			0.950376	0
		0.105628	0			0.788529	0
		0.40717	1.13829			1.30681	0
		0.0539145	0.282326			1.36383	0
		0.278044	0.155898			1.09718	0.0520769
		0.166139	0.374979			1.20035	0
		0.562763	1.02452			1.13837	0
		0	0.278229			1.14473	0.206098
		0.107278	0.262628			0.796678	0
		0.720446	0.0641991			0.523448	0.0736467
		0.174412	0.36569			1.01893	0
		0.343493	0.531172			0.339216	0
		0	0.0197386			0.759552	0
		0.0568659	0			0.954072	0
		0.257769	0.308878			0.976697	0
		0.223614	0.0607631			0.936254	0
		0.00579086	0.511554			0.918967	0
		1.26927	0.356027			0.857032	0
		1.0535	0.873467			0.874891	0
		0	0.895308			0.925443	0
		0.574953	0			0.990903	0
		1.14883	0.771517			1.06437	0
		0.810789	0.422769			1.16174	0
		0	0.606895			0.797898	0
		0	0			1.36928	0.100171
		0.741144	1.12143			0.791159	0
		0.282767	0.566748			0.972778	0
		0.0172185	0.55779			1.20172	0
		0.00559385	0			1.09712	0
		0.755951	0.416036			1.33289	0
		0.670796	0			1.27116	0
		0.360167	0			1.3075	0
		0	0.287583			1.13743	0
		0.131064	0			1.02932	0
		0.874133	0			1.16481	0
		0.259883	0.126544			1.45947	0
		0.101117	0			1.30736	0.137801
		0	0.701518			1.09674	0
		0.571423	0.145236			0.767105	0
		0.292008	0.344852			0.761943	0
		0.125278	0.283747			1.13882	0
		0	0.600642			0.952401	0
		0.226301	0			1.21776	0
		0	0.0771029			1.07415	0
		0.650656	0.905702			1.12517	0
		0.282324	0.583028			1.04834	0
		0.357199	0.0681943			1.39544	0
		0.0998905	0.641201			0.719208	0
		1.39184	0.490288			1.00126	0.0925773
		0.180151	0.404591			1.23218	0
		1.31269	0.920641			0.46264	0
		0.423458	0.931101			0.884247	0
		0.474916	0.156025			0.812142	0
		0	0.366942			0.64464	0
		0.00516024	0.628254			0.963257	0.134149
		0.481732	0.714711			0.752579	0
		0	0.0252342			0.405432	0.485469
		0.725627	0.281169			0.529002	0.147876
		0.410411	0.496577			0.520801	0.0183011
		0.0291555	0.504875			0.721628	0.513295
		0.223587	0			0.733006	0.0594072
		0.335381	0.413647			0.0590738	0.249967
		0.305653	0.391919			0.785006	0.0598496
		0	0.325315			0.351136	0.25218
		0.437125	0.647445			1.09081	0
		0.00955577	1.27481			0	0.35411
		0.26218	0.324629			0.0600884	0.613228
		0.522913	0.434791			1.18083	0
		0	0.224488			0.687018	0
		0	0.656469			0.669084	0
		0.384141	1.16297			0.547344	0.290929
		0	0.632964			0.686096	0.481582
		0	0.385388			1.26009	0
		0.0319383	0.185646			1.07576	0.279173
		1.1391	0			0.746887	0
		0.255359	0.39441			1.08299	0
		0.368775	0.524956			1.41867	0
		0.453158	0.221181			1.337	0
		1.68392	0			0.809878	0
		0	0			0.869179	0
		0.617795	0.557789			0.814271	0
		0	0.0722031			0.420072	0
		0.55224	0.31942			0.658383	0
		0.446893	0.358283			0.320741	0
		0.41205	0.0237677			1.28452	0
		0	1.00803			1.50646	0
		0	0			1.0257	0.142668
		0.028178	0.0447114			1.45564	0
		0.64692	0.548397			1.16606	0
		0.00514011	0			1.16136	0
		0.479998	0.153786			0.85367	0
		0.0195654	1.01825			1.25737	0
		0.390328	0.58648			1.28962	0.0417861
		1.12594	0			1.16196	0.244167
		0	0.36435			0.95255	0
		0.116218	0.466118			0.768558	0.0173733
		0.788468	0.0988024			0.668135	0
		0.348819	0.00507725			0.749715	0.215478
		0.504781	0			0.678964	0
		0	0			1.59731	0
		0	0			0.892404	0
		0.128364	0			1.02446	0
		0.302243	0.230148			0.020154	0
		0.900605	0			0.696104	0
		0.928682	0			1.22114	0
		0.927396	0			0.992326	0
		0.00888956	0			0.883373	0
		0.122795	0			0.688863	0
		0.617174	2.00604			0.838761	0
		1.75364	0.750707			0.825864	0.244443
		0	0.453166			1.14708	0
		0.297734	0			1.29896	0.420766
		1.96789	0			0.437937	0.273079
		0	0.756632			0.188307	0.277802
		1.50616	0			0.558371	0.296505
		0	0.256359			0.592595	0.372497
		0	0.792837			0.259872	0.188747
		0.227586	0.244406			0.606113	0.030396
		0.228548	0			0.543419	0
		0.537047	0.250275			0.0561286	0.514953
		0	0			0.563096	0.436296
		0.0985202	0.448989			0.265564	0.498562
		0.798826	0.942691			0.800732	0.241144
		0.0317636	0.10702			1.17482	0
		0.736664	0.551457			1.27893	0.455002
		0.738417	1.60835			0.910894	0.018186
		0.973926	0			0.642601	0.162756
[truncated: 1,629 more rows]

## Sheet: Figure 6J
CGE NGFC CLUSTER	CAx PC CLUSTER		CGE NGFC CLUSTER	CAx PC CLUSTER		CGE NGFC CLUSTER	CAx PC CLUSTER		CGE NGFC CLUSTER	CAx PC CLUSTER		CGE NGFC CLUSTER	CAx PC CLUSTER		CGE NGFC CLUSTER	CAx PC CLUSTER
KCNIP 1	KCNIP1		KCNIP 2	KCNIP2		KCNIP3	KCNIP3		KCNIP4	KCNIP4		DPP6	DPP6		DPP10	DPP10					KCNIP1	KCNIP2	KCNIP3	KCNIP4		DPP6	DPP10
1.49935	0		0.547351	0		0.766288	0		1.71137	0		1.03872	0		0.565318	1.65546			CGE NGFC CLUSTER		1.4433	0	0.270001	0.902378		0.661341	0.742738
1.92944	0		0.499	0		0	0		1.63247	0		1.08582	0		0.755623	0			CAx PC CLUSTER		0	0.887554	0.664459	0.785052		0.560118	0
2.56254	0.00703206		0.865574	1.02185		0.359614	0.215057		1.95428	0.415514		1.66087	0.628635		1.82003	0.888936
1.16059	0		0.268078	0		0.927164	0		1.63814	0		0.094562	0		0.0578031	2.07312
1.33972	0		0	0		0	0		1.035	1.12436		0.146241	0.0449049		0.580747	0.278766
0.622318	0		0	0.400482		0.401726	0.200198		0	0.710172		0.663573	0.673179		0.00781702	0.710172
1.8683	0		0.10558	0		0	0		1.67184	0.332612		1.47442	0.135738		0.0069356	0.286907
0.805405	0		0.723531	0		0.483625	0.729023		0.946565	1.05704		1.08945	0.750362		0	1.42361
1.40253	0		0	1.20327		0	0.506645		1.60148	0.665565		1.52309	0.268397		1.05431	0
0.272683	0		0	0.700304		0	0.1814		0	0.767137		0.536573	0.276291		1.08224	0
1.33499	0.797572		0.00757977	0.40783		0	0.725229		1.08621	0.595219		0.856254	0.327393		0.695311	0
2.06199	0		0	0.306788		0	0.234728		1.92393	0.674867		0.480992	0.635614		1.95577	0
1.11534	0		0	0.736559		0.0767667	0.815152		1.83389	1.29978		0.30679	0.399446		0.975185	0
1.35949	0		0	0.598049		0	0		1.79845	0.0401129		0.336831	1.147		0.778791	0
1.34773	0		0	0.28336		0.524334	0.491455		0.534119	0.478851		0	0.540339		0.202321	0
0.840357	0		0.295106	0.819796		0.0987397	0.0443599		0.0768036	0.519018		0.148127	0.64562		0.240136	0
1.29284	0		0	0.475521		0.553093	0		0.14156	0.925104		0.447776	0.475521		0.172504	0
1.03548	0		0	0		0	1.06255		0.356167	0.496831		0.345598	1.06255		0	0.365518
0.427399	0		0	1.20404		0.517607	0.60324		0	0.613482		0.205828	0.880216		1.20787	0
0.751863	0		0	0		0.292639	0		1.51438	0.860422		0.602636	0		0	0
1.15715	0		0	0.509658		0.473308	0		1.52522	0.36243		1.05716	0.107914		0.178841	0
1.11425	0.0209057		0	0.100414		0	0.635138		1.2707	0.352427		1.24423	0.855288		0.915248	0
0.788042	0		0.0279311	0.596272		0.630245	0		0.98956	0.644971		1.52956	0.571004		0.32039	0
0.0313777	0.361284		0.292671	0.566193		0	0		0.83128	0.816247		1.01659	0.214582		0.210059	0.141768
1.27562	0		0	0.500225		0.501537	0.599336		0.551399	1.11901		1.14253	0.440599		0.140417	0
0.409215	0		0.469368	0.256857		0.571049	0.256857		1.15629	0.0751967		0.852613	0.784343		0.855924	0
0.25851	0		0	0.616036		0.658084	0		0.290041	0.958787		1.0564	0.584895		0.149564	0
0.604731	0		0	0.529675		0	1.17164		0	0.411864		0	0.529675		0.797587	0
1.33552	0.207038		0.922649	0.832049		0	0.0789529		1.16492	0.581473		0.431031	1.02638		0.710289	0.0162971
1.10761	0		0	0.44727		0	0.60841		0.782071	0.839878		0	0.747152		1.28068	0
0.814565	0		0	0.38517		0	0.150698		0.755199	1.23538		0.591656	0.0179104		0.892167	0
1.49183	0		0	0.594692		0	0.533062		1.90837	0.908462		0.00757662	0.742581		1.16726	0
1.17418	0		0	0.593961		0	0.0191289		0.826952	1.14542		0	0.419665		1.2872	0
0.632311	0		0.611725	0.814456		0.632311	0.688693		0.93351	1.0469		0.937272	0.28067		0.0189914	0
0.609653	0		0	1.00061		0	0.614537		2.26652	1.24042		0.515567	0.36931		1.27765	0
0.867271	0		0	0.110058		0	0.0164838		0.845958	0		1.07873	0.153754		1.88406	0
0.68788	0		0	0.805707		0.180569	0		1.313	1.00445		1.16068	0.701127		0	0
1.2759	0		0	0.608001		0	0		1.08571	0.574099		0.574076	0.151234		1.08571	0
1.39266	0		0.266993	0.657755		0.223455	0.787936		0.848187	1.01289		0.960736	0.812056		0.130243	0
0.283609	0		0	0.973047		0.461715	0.369686		1.53691	0.429661		0.0171114	0.539792		1.50868	0
0.500767	0		0	0.565384		0.814376	0		0.18448	0.0777609		0.612012	0.601478		0.545783	0
1.17322	0		0	0.0190097		0	0.338628		0.776361	0.591138		0.898496	0.692126		0.539248	0.191534
0.961992	0		0	0.68875		0	0.102677		1.93532	0.396493		1.20343	1.03683		0.747456	0
1.5544	0		0.0298923	1.06539		0	0.300733		1.80293	0.200152		1.02342	0.829686		0.464803	0
1.4822	0		0.4682	0.0469735		0.272143	0		1.22873	1.08378		1.88298	0		0.116195	0
1.43393	0		0	0.633886		0.277264	0		1.46209	1.07732		0.830312	0		0.573701	0
1.30685	0		0	0.360584		0	0		0.015411	0.113866		1.14524	0.844417		0.25857	0
1.22664	0		0	0.654865		0	0.301833		1.21416	0.571395		0	0.0430997		1.06555	0
1.90898	0		0	0.981667		0.299769	0.464683		1.52743	0.916251		0.995142	0.916251		0.525065	0
1.06683	0		0	0.43171		0	0.343813		0.932392	0.373979		0.160482	0.987476		0.7445	0
1.43128	0		0	0.110272		0	0.622029		0.185818	1.01958		1.15392	0.814958		1.22748	0.228314
1.25636	0		0	0		0.43521	0.653114		1.1505	0.995391		1.49369	0.786641		0.0520795	0
2.24631	0		0	0.775658		0	0		1.08684	1.12609		1.65067	1.09027		0	0
1.69181	0		0	0.47985		0	0.492906		0.110057	0		0	0.723569		0.437265	0
0.389624	0.740702		0.033941	0.338705		0	0.16481		0.557161	0.639663		1.35742	0.500464		0.576744	0
0.787534	0		0	0.43891		0.375259	0		0.124964	1.31766		0.725063	0.235312		0.8096	0
0.802911	0		0	1.29235		0	0.298683		0	1.01555		0.698688	0.930453		0.771983	0
0.404753	0		0	0		0	0.590576		0.645609	0.566173		0	0.405747		0.915008	0
0	0		0	0.67781		0.464136	0		0.315247	0.635012		1.19182	0.926851		0.0886053	0
0.341149	0		0	0.729684		0	0		0	0.73999		0.94062	0.0212609		0.0273429	0
0.419046	0		0	0.775993		0.620691	0		0.367281	0.512909		0	0.64683		1.3407	0
0.89629	0		0.0205096	0.748534		0.301779	0		1.00058	0.496301		0.637115	1.08158		0	0
0.746407	0		0	0.696803		0	0		0	1.00213		0.783029	1.12886		0.20553	0
1.61982	0		0.334614	0.511919		0.497717	0		1.85029	0.937755		0.423761	0.511919		1.67866	0
1.28567	0.168116		0	1.18108		0.407936	0.234629		1.33297	0.0201374		0.246259	0.513583		0.802854	0
1.74563	0		0.0168695	1.09446		0	0.167659		1.27226	0.487798		0.273634	1.03142		0.61092	0
0.450864	0		0	0.892097		0.827912	0.77284		0.0968785	0.448402		0.836763	0.437392		0.437818	0
1.48042	0		0	1.23877		0	0.692496		1.67948	0.226509		0.697582	0.754151		1.24545	0
1.31252	0		0	1.13409		0.641074	0.0342553		0.731514	1.12282		1.2093	0.773543		0.617126	0
1.69078	0		0	1.29226		0	0.0939865		1.73229	0.762263		1.24328	0.400603		0.785835	0
1.08927	0		0	0.75613		0.938533	0.674623		1.16111	1.49608		0.836397	0.477054		0.0586188	0
1.44935	0		0	1.16856		0.78459	0.402216		1.1213	0.295979		1.27166	0.75115		0.133017	0
1.02189	0		0	0.823456		0.899478	0.422902		0.561256	1.08989		1.24132	0		0.0797292	0
1.29073	0		0.109774	1.01321		0	0.136454		1.733	0		0.851256	0.639475		0.915206	0
1.38394	0		0	0.779699		0	0.859712		0.284507	0.546186		0.988968	0.646223		1.48124	0
0.7751	0		0	0		0.909274	0		0.0299574	0.124104		0.241923	0		0	0
0.0685473	0		0.132696	1.11585		0.779125	0.183614		1.69439	0.960276		1.05169	0.198749		0.140433	0
1.15402	0		0	0.8886		0.625064	1.03221		1.76689	0.28412		1.13505	0.352399		0.0168834	0
2.39617	0		0	1.69719		0	0		1.40015	0.380843		1.45489	0.959839		0.396191	0.0641167
2.0169	0		0	0.800332		0.763631	0		1.69952	0.539605		0.353062	0.888162		0	0
1.22516	0		0	0.673171		0.105718	0		0.0144398	0.759576		1.18298	0.162904		0.131552	0
1.00185	0		0	0.391872		0	0		0	1.33843		1.13066	1.12929		0.158994	0
1.05449	0		0	1.26439		0	1.33308		1.02192	0.920608		0.0182313	0		1.19386	0
1.68376	0		0	0.880216		0.900148	0.474989		1.58425	1.30042		0	0.141499		0.897761	0
1.66993	0		0	0.689359		0.00591342	0		1.19608	1.0666		0.67033	0.573294		1.26033	0
0.642147	0		0	1.31774		0.0799609	0.456038		1.02188	1.1618		1.07492	0.940041		0.246864	0
1.58025	0		0.0574611	0.854938		0	1.28138		1.22588	0		0.399377	0.149575		1.03101	0.183717
1.87897	0		0.0246511	0.700868		0.252322	0.592363		1.97435	0.508734		1.3756	0.508734		0.812756	0
0.334523	0		0	1.25654		0	1.19761		0.391536	0.0726906		1.18097	0.390364		0.107514	0
1.58701	0		0	1.07718		0	0.638543		0.547077	0.58072		0.00537954	0.260753		1.23962	0
0.829268	0		0	1.08243		0.598928	0.488354		1.01636	0.664978		0.656594	0.475392		1.1352	0
0.924931	0		0	1.06598		0.162919	0.882791		0.598278	0.354376		0	0.449198		0.0347765	0
0.876384	0		0	0.955514		0	0.520382		1.14763	0.628433		0	0.795706		0.169431	0
1.41249	0		0	0.45511		0.0964181	0.169957		1.21373	0.785663		1.19284	0.45511		0.370985	0
1.34452	0		0	0.612366		0.569673	0.560145		2.42345	0.917031		1.00385	0.0724068		0.0345573	0
0.617259	0		0	0.987785		0.277776	0.265872		0.439857	1.14813		0	0.340814		1.13446	0
1.24307	0		0	0.872627		0	0.402092		0.831585	0.733115		0.155293	0.152706		1.50133	0
1.19643	0		0	0.604458		0.767395	1.10692		1.54266	0		0.00737114	0.096447		0.39763	0
0.960454	0		0	0.197604		0.267899	0.377619		1.70697	0.847037		1.10397	0		0.0315003	0
1.9449	0		0	1.18061		0.92374	0.491819		0.977106	1.04385		0.465719	0.0428803		0.0643586	0
0.187023	0		0	0.877409		0	0		0.946505	0.231798		0	0.56675		1.68722	0
0.296352	0		0	0.689513		0	0.302306		2.40499	0.285866		0.323848	0.23486		0.065309	0
1.24087	0		0.361589	1.11297		0	0		0.870474	1.45049		0.915807	1.07774		0.544389	0
1.22802	0		0.399126	0.816323		0	0.637075		2.10809	0.59702		1.3107	0.278941		0.369437	0
1.42544	0		0	0.509705		0	0.491387		1.42544	0		1.31035	0.527693		0.781222	0
0.68962	0		0	0.267658		0.730934	0.664906		0.863408	0		1.17174	0.535458		0.0207972	0
1.36481	0		0	0.501249		0	0		0.989992	1.59549		0.415229	0.633962		0.0660488	0
0.0376092	0		0	1.05883		0	0.174526		0.0189814	1.55145		0.740538	0.593547		0.507488	0
1.32613	0		0	0.909132		0	0		1.878	1.08501		0.0074692	0		1.69347	0
0.621929	0		0.117639	0.600308		0.14255	0.886235		0.669525	0.766282		1.18646	0.0790588		0.606579	0
1.96087	0		0	0.880562		0	0		1.61847	0.353242		0.967764	0.429609		0.148877	0
1.80126	0		0	0.606188		0	0.195628		0.616859	0.220694		0.00556032	0.499697		1.53733	0
1.68205	0		0	1.07377		0.0342214	0		1.11971	0		0	0.0697498		1.22148	0
1.46205	0		0.0155878	0		0	0.82491		1.58629	1.5671		1.32015	0.403447		0.89203	0
1.45034	0		0.191935	0.852392		0.574271	0		0.494582	0		1.03984	0.626182		0.610487	0
1.2699	0		0	0.803107		0	0		0.162451	0		0.0923333	0.815037		1.21235	0
1.22557	0		0	0.348319		0.438127	0		0.885731	1.64762		0	0.0540694		1.13479	0
2.56506	0		1.06729	1.16797		0	0		1.44889	0.730902		1.11448	0		1.07469	0
1.57863	0		0	0.960437		0.481347	0.0245101		0.704092	0.749802		0.449662	0.467193		0.209792	0.0717984
0.914293	0		0.0439812	1.05806		0.220977	0.209007		1.80421	0.529075		1.24985	1.20767		0.653228	0.020912
2.23549	0		0	0.535874		0	0.656979		0.679262	0.669573		1.08206	0.381499		1.01601	0.0477348
1.4041	0.0893054		0	0.846365		0.0486983	0.544625		1.23539	0.24705		0.908449	1.04554		0.552426	0
1.04449	0.556126		0	1.32241		0.485859	0.138701		0.00692673	1.33554		1.50169	0.891266		0.28791	0.048403
0.965378	0		0	0.46731		0.257322	1.12964		0.800508	0		0.926638	0.325209		0.00585208	0
0.641422	0		0.0139519	1.54013		0.494245	0.699782		0.106517	0.839475		0.40464	0.710433		0.3165	0
1.15108	0.496093		0	0.325971		0	0.385952		0.831591	0.356411		1.20361	0.341307		0.167776	0.0211838
0.124312	0.900836		0	0		0	1.48004		1.51762	1.36249		0.124312	0.0672874		0.556061	0
1.03116	0		0.368962	0.840766		0.998346	0.751188		1.23304	0		0.694349	0.0354767		0.723002	0
2.10809	0		0	1.50135		0	0.694152		1.3303	1.3385		0.710887	0.664851		0.960849	0
1.38653	0		0	0.81073		0	0.857504		0	0		0	0.875618		1.09408	0
1.03901	0.376437		0.286739	0.282535		0	0.420276		0.670246	1.56596		0.330293	0.746717		1.02634	0
1.18104	0		0	1.06571		0	0.845753		0.678227	0.377428		1.42167	0.948534		0.18815	0.168401
1.3846	0		0	0.908936		0.765043	0.813181		0.990582	0.607978		0	0.950217		1.05896	0
1.15324	0		0	0.936811		0	0.235424		0	0.452175		0	0.465083		0	0
1.09495	0.282		0	0.722115		0	1.18176		0.149619	0.476753		0.674977	0.722115		0.868248	0.877518
1.09858	0		0	0.806851		0	0.870481		1.25984	0		0	0.190878		0.43014	0
1.77337	0		0	1.10915		0.760346	1.0938		0.446216	0		0	0.244562		0.975153	0
1.60454	0		0.414203	0.619458		0.452443	0.74067		1.44554	0.377674		1.17601	1.0209		0.046108	0.84019
2.05585	0		0.00755873	0.479099		0.375173	0.379097		1.33493	0.778416		1.33093	0.579612		1.10719	0
1.48646	0		0	0.394194		0.796775	0.192769		0.130364	1.56615		0.816749	0.733493		0.477273	0
0.335334	0		0	0.848076		0	0.609085		2.15877	0.997587		0.748699	0.571137		1.14042	0
2.32268	0		0.708966	0.464058		0	0.552818		1.63463	0.999228		1.31532	0.624504		1.54197	0
0.804154	0		0	0.520518		0.00483068	0		0.90506	0		0.0564828	0.210372		0.181102	0
1.05298	0		0	0		0.0488842	0.557933		0	0.866221		1.28236	0.519182		0.0488842	0
0.799895	0		0	0.632175		0.605377	0		0.00451124	1.3477		1.34651	0.894818		0.268084	0
1.70755	0		0.707523	0		0.687632	0		1.71207	0.752301		1.07774	0.504521		0	0
1.37602	0		0	0.735073		0.525	0.675496		1.81707	0.806799		1.43292	1.07501		0.0805115	0
1.10738	0		0.0438352	0.804673		0.359885	0.601019		0.618624	0.676651		0.968154	0.149465		0	0
1.56701	1.07618		0	0.271917		0	0		0.859698	0.793377		0.193968	1.15304		0.637076	0
1.40777	0		0	0.156602		0	0.226574		1.74972	0.016811		0.630049	0.878424		0.0436617	0
1.79878	0		0	0.931537		0	0.250191		1.65089	0.579937		1.12384	0.743669		0.154942	0
1.96688	0		0	0.528318		0	0.0993127		0.00577811	1.6134		0.0341782	0.385162		1.2404	0
2.0487	0		0	1.0113		0.496887	0.794034		1.39977	0.495177		1.64872	0.25806		0.988809	0
1.09302	0		0	0		0.157519	0.640531		1.06401	0.621037		0.904805	1.01463		0.569687	0
1.47861	0		0	0.880422		0	0.21836		0.873008	1.798		0	1.02172		1.17266	0
1.70763	0		0	0.30456		0	1.28863		1.5663	0.517691		0.461976	0.199177		1.35406	0
1.62287	0		0	0.432744		0.265663	0		1.01431	0		0.265663	0.636353		0.46371	0
1.45794	0		0	1.00897		0.482352	0		0.24101	0		1.05629	0.124678		0.690115	0
1.08791	0		0.51743	0.372968		0.00540704	0.756166		0.627483	0.572239		1.54474	0.593272		0	0
0.717786	0		0	0.0163034		0	1.42057		0	0		1.54013	0.524938		0.0186847	0
1.94175	0		0	0.422694		0.663121	0.172171		0.309446	0.38506		1.24274	0.5388		0.733691	0
1.52797	0		0.146772	0.523106		0.3389	0		0.985454	1.04699		1.23135	0.597828		0.855242	0
1.57077	0		0	0.133654		0.0261169	0.194329		1.25519	0.549772		1.53835	0.265335		0.360439	0
0.65212	0		0	0		0.243111	1.37034		0.909649	0.502346		1.03163	0.135423		0.108057	0
1.98246	0		0.156193	0.810028		0.131797	0.484884		1.18335	0.117603		0.587886	0.117603		0.677642	0
0.226215	0.0205508		0	0.17132		0.947862	0.496929		0	0.615888		1.39619	0.445078		0.141766	0.361884
1.53198	0		0.119284	0.90702		0.405525	0.671353		0.220509	1.02567		1.31026	0.347862		0.897554	0
2.58542	0		0.627685	0.644469		0	0.306175		1.71173	0		1.27274	0.460246		0.253898	0
1.51847	0		0.251104	0.387213		0.116122	0.190756		1.12741	0.0512074		1.11831	0.131125		0.832251	0
0.301425	0		0	0.467548		0.274604	0.584875		0.279124	0.584875		1.09974	0.0389691		0.283624	0
1.59157	0		0	0.588287		0.4502	0		1.71981	0.964961		0.701429	0		0.751425	0
2.08817	0		0	0		0.609554	0.384108		0.039733	0.784835		1.85668	0.638709		1.43006	0
0.921093	0		0	0.745969		0	0		2.52829	1.17457		0	0.0943749		0.0108972	0
1.79522	0		0	0.0622754		0	0.717598		1.30421	1.14481		0.772291	0.211559		1.28255	0
0.403623	0		0	0.478863		0.0120549	0.346854		0	1.17143		0.500071	0.660992		0	0
0.929894	0		0	1.16965		0	0.55852		0.623065	1.18048		0	0.100026		1.45466	0
1.90645	0		0.748937	0.911415		0.32577	0.477873		1.73967	1.07345		1.29243	0.504647		0.285966	0
1.04294	0		0.211655	0.668766		0.896834	0.65054		1.84538	0.574118		1.45113	0.746909		0.0212028	0.334037
1.22925	0.184825		0.107396	0.291435		0.714446	0.410466		0.976551	0.546643		1.10712	0.536802		0	0.141722
1.7387	0		0	2.08927		0.185797	0		1.41846	1.41918		0.159771	0.722512		0.954089	0
1.24493	0		0	1.56189		0.34509	0.455455		0.835097	1.05602		0.634486	0.633059		0.489753	0
0.374403	0		0	0.631174		0	0		1.61106	0.658869		0.212636	0.423888		0.781465	0
1.50012	0		0	0.790382		0.394664	0.528391		0.365116	1.04521		0.45675	0.0899149		0.00860368	0
1.21495	0		0.00943585	0.0901178		0	0		0.718979	0.236804		0.00943585	0		0.157558	0
1.40217	0		0	0.584892		0.430486	0		0.630834	0.736459		0.322474	0.525396		0.355201	0
0.00468332	0		0	0.688027		0.607363	0.583237		0.544022	0.542234		1.23304	0		0.818661	0.531715
1.27605	0		0	0.889996		0.00632508	0.459991		0	0.862202		1.01206	0.579032		1.33286	0
0.287046	0		0	0.492988		0	0		1.04662	1.15002		0.208612	0.577223		1.25646	0
1.71641	0		0	0.603284		0.471261	0.272194		0.00894514	1.49919		0.126438	0.0880222		0.149914	0
0.309926	0		0	0.250425		0	0		0.0885713	0.568029		0.900333	0.751652		0.606232	0
0.803925	0		0	1.04509		0	0.0177412		0.0106758	1.49394		1.00357	0.639205		0.0724424	0
1.49698	0		0.0151628	0.189989		0	0.201458		1.30535	1.79999		1.1774	0.794606		0.101607	0
0.669628	0		0	0.11904		0.0219324	0		0.611198	1.19196		0.62316	1.24013		0.367066	0
1.02986	0		0	0.815935		0.204413	0.186092		1.35576	1.14664		0.378766	0.777519		0.681047	0
1.80134	0		0	0.682104		0	0.570754		1.2148	1.05078		0.790381	0.61506		0.157793	0
1.36448	0		0.145893	1.1242		0.279145	0		1.39608	0.13284		1.49416	0		1.09688	0
0.748111	0		0.594911	0.336987		0.304843	0		0.134369	1.23064		1.0498	0.428071		0	0
1.66686	0		0.117346	0		0.548979	0.935513		1.32302	0.645926		0.758998	0		1.285	0
1.58696	0		0	0.455925		0.331933	0.239619		1.17086	0.467302		0	0.792729		1.29751	0
0.695746	0		0	0.706516		0.471003	0.445708		0	0.775338		0.339044	0.846633		0.691941	0
1.71101	0		0.366186	0.599996		0	0		1.17749	0.627804		0	0		1.00312	0
0.849299	0		0	0		0	0.930232		0.382907	0.594817		0	0.69881		1.57922	0
1.48423	0		0	0		0	0.99709		0.828751	0		0	0		0.97041	0.34986
1.15492	0		0	1.00231		0.621657	0.0210675		1.15728	0.877634		0.844471	0.081731		0.355755	0
1.05551	0		0.199181	0		0.918723	0		1.17202	0.367865		1.80324	0.239532		0.299343	0.019148
0.420345	0		0	0.510776		0.214388	0		0.87882	0.287651		1.09316	0.520254		1.04761	0
1.91442	0		0	0.516082		0.152767	0.516082		2.19745	0.129759		1.42563	0.64217		0.262012	0
1.25288	0		0	0.637397		0.254722	0		1.17066	0.664226		0.491926	0.491259		0.171003	0
1.09708	0		0	0.576058		0.27	0.437512		0.368507	0.774044		0.734709	0.605477		0.491312	0
0.803997	0		0	0		0	0.650923		0.0226029	0		0	0.0525539		1.2973	0
1.41443	0		0	0.540316		0	0.519743		1.37656	0		1.0275	0.0173258		0.814883	0
1.79687	0		0	0.0649066		0.537526	0		1.57307	0.164518		0.553545	0		1.64495	0
0.418043	0		0	0.705832		0.44427	0		0.656695	1.2873		0.993667	0.38752		1.0416	0
1.48974	0		0	0.576707		0	0.374033		1.50234	0.422754		1.25956	0.535085		0.340796	0
1.59258	0		0	0.733924		0.231979	0.395812		0.165092	0.0545162		0.103268	0.155369		0.776992	0
1.28582	0		0	0		0.00732602	1.13866		0.457982	0.713925		0.0777775	0.492726		1.34692	0
1.74105	0		0	0.824513		0	0.666856		0	0		0	0.404799		1.16793	0
0.395106	0		0	1.1568		0.359767	0		0	1.00094		0.762834	0.892914		0.0153458	0
0.960965	0		0	0.161312		0	0.499374		1.35273	0.853518		0.248497	0.375097		0.621631	0
0.0714623	0		0	0.369487		0.23786	0.369487		0.92737	1.26213		0.01835	0.920784		1.47911	0
1.07588	0		0	0.473946		0.736991	0.543375		0	0.056139		0.723786	0.669258		0.967375	0
1.89104	0		0.467218	0.564969		0	0		1.92127	1.03963		1.04887	0.65656		0.258784	0
1.19372	0		0.0704533	0.209171		0.381197	0.627253		0.97365	0.320681		1.35668	0.401721		0.140807	0.320681
0.881892	0		0	0.599712		0.326448	0.425308		0	1.04915		0.918932	1.20365		0.636591	0
0.984205	0		0.00649901	0.924142		0.247147	0.795598		0.517661	1.24898		0.52925	0.403703		0	0
1.84409	0		0	0.534039		0	0.574582		0	1.02534		0	0.462584		0	0
1.56989	0		0	1.3333		0	0.212184		1.56719	0.837598		1.12001	1.10524		0.972346	0
0.915739	0		0	1.15105		1.33163	0.843258		0.0817173	0		0	0.547839		0.779661	0
1.01835	0		0.00546071	1.11319		0	0		0.565947	1.22429		0.00546071	0.539654		1.09449	0
1.35458	0		0	0.91927		0.07549	0.215369		1.38775	1.32829		0.376658	0.616289		0.482898	0
2.11913	0.146232		0	0.854287		0	0.653519		2.0679	0.446206		1.96002	0.460502		0.160279	0
1.04449	0		0.212985	0		0.515287	1.0117		0.518118	0.957205		1.14908	0.377341		0.224429	0
1.60554	0		0	1.14254		0.5603	0		0.170471	0.550324		0	0.47025		0.060111	0
2.13714	0		0	0.53472		0.780733	0.02058		1.00546	0.616548		0.522198	0.80986		0.667558	0
1.02021	0		0	1.12583		0	0.959809		0.393117	1.151		0.918993	1.05997		0.703297	0
0.531959	0.254946		0	1.12673		0	0.45792		0	0.758545		0.904036	0.939051		0.423107	0
1.11858	0		0	1.3791		0	0.299786		1.99053	1.32639		0.439162	0.321142		0.453094	0.135976
1.2613	0		0	0.763762		0.017995	0.210217		0.748433	0.228999		0.0414955	0.0457276		0.202081	0.171561
1.57129	0		0	0.497292		0.915144	0.435118		0.395202	1.33502		0	0.497292		0.991915	0
2.14731	0		0.425346	0		0	0		2.00532	1.31604		0.826669	0.202117		0.613548	0.628928
0.819545	0		0	0.192577		0	0.878361		0.734859	1.39284		0.935817	0.57089		0.0787197	0.276536
1.70901	0		0	0		0.175254	0.431812		1.63138	1.14246		0.54633	0.0253914		0.965351	1.39489
2.1336	0		0	0		0.353332	0.317855		1.43133	1.39794		0.749896	0.257736		1.1001	1.06389
0.554231	0		0.366334	0		0	0.926548		0.485621	0.813824		0.613239	1.02784		0.808954	0.813824
0.306768	0		0	0.506354		0.359847	0.996213		0	1.17785		1.23355	0.687555		0.402659	0.307176
1.4935	0		0	0.431284		0	0.476936		2.29296	0.562427		0.900833	0		0.938625	0.358643
0.606963	0		0	0		0.482426	0		0.0710765	0.71464		0.60025	1.06458		0.387079	0.740489
2.17499	0.41991		0	0		0.367709	0.744918		0.722187	0.240078		1.42428	0.892095		0.886466	0.524023
1.3163	0		0	0.166457		0.308906	0		1.48004	1.44152		0.486028	0		0.228227	0.554411
0.555809	1.89854		0	0		0	0		0.245089	0		0.28273	0		0.151324	0
0	0		0	0.313189		0.840468	0		2.2607	1.10618		0.436151	0.233252		0.0130885	0.212228
0.949278	0		0	0.825285		0.00847924	0		1.20393	0.390558		0.299458	1.06857		1.59789	0.5031
1.06973	0.0987004		0	0.41784		0.0320689	1.42646		0	0.618326		0	0.467801		0	0.948551
2.01026	0		0	0.515085		0	0.202609		1.11947	0.698469		0.43896	0.232718		1.04904	1.06783
0.384523	0		0	0		0.0185828	1.00873		0.563332	0.626502		0.00623272	0		1.12354	1.13744
1.14132	0		0	0.0256859		0	1.05548		1.01272	0.980276		0	0.647445		0.228661	1.15863
1.35324	0.0873046		0	0.1867		0.406029	0.812883		1.63433	1.06229		1.15133	0.671875		0.693993	1.13084
2.44304	0		0.169125	0.193937		0	0		1.47102	0.692528		0.918846	0.0464637		0.486439	0.524504
1.78936	0		0.631775	0.544023		0	0.393359		0.817118	0.86439		1.23691	0.0697988		0.338022	0.650085
1.52054	0		0	0		0	0.389122		0.536539	0.32248		0.0794398	0.565935		0.114746	0.475535
1.27013	0		0.0973689	0		0.0454369	0.683506		1.51135	0.717468		1.59115	0.507707		0.47269	0.534794
1.99221	0		0	0		0	0.273525		1.82357	0.396213		0.488395	0.0281978		1.29685	0.999141
1.6485	0		0	0.426459		0.222127	0.0326985		1.81489	0.940878		0.992222	0		0.702755	1.26959
1.54299	0		0	0.499056		0	0.520649		0.859289	0.660001		0.761068	0.454419		0.260813	0.165318
1.27083	0		0	0.28548		0	0.670129		0.752387	0.857946		0.81812	0.462084		0.772854	0.961375
0.234943	0		0	0		0.068643	0.67034		1.29428	0.558722		1.06884	0.616088		0.474485	1.39117
0.981184	0		0	0		0	1.06248		0.279095	0.0259594		1.51745	0.566834		0.951792	1.31778
1.57041	0.0311819		0	0.119286		0	0.775605		1.63934	0.924382		0.615693	0.0907721		0.550591	1.06484
0.825225	0		0	0.456189		0	0.193996		0.807669	1.12386		0.488487	0.77818		0.0605469	1.01362
0.01087	0		0	0		0.456951	0.459746		1.32867	1.35318		1.0728	0.428552		0.355042	0.311004
1.30411	0		0.0207149	0.506399		0.127559	0.379473		1.26796	0.935845		1.66993	0.582867		0.0104111	0.804777
1.54971	0		0	0.132354		0.08618	0.945589		1.34158	0.945589		0.454265	0.276422		1.01162	0.688431
2.30625	0		0	0.511908		0.488278	0		1.18084	0.919819		1.95899	0.754643		0.44411	0.978939
1.69579	0		0	0.017991		0	0.0700998		0.489025	0.787616		0.0741031	0.626677		0.929494	0.254999
2.25497	0		0	0		0	1.01087		1.67727	0.719435		0.693573	0.202206		1.1948	0.663318
1.4479	0.124353		0	0.275962		0	0.475683		0.294566	0.887929		0.247066	0.772541		0.739602	0.876971
2.05951	0		0	0.258591		0	1.07096		1.44727	0.406583		1.91101	0.0848294		0.165117	0.918302
2.34454	0		0	0		0	0.80641		0.643903	0.187841		1.64575	0.612671		0.391647	1.19714
1.85404	0		0	0.295079		0	0		0.479749	0.871709		0.690654	1.20849		0.361388	0.801288
0.959444	0.0919569		0	0.515349		0.0699916	1.33321		1.02178	0.674564		1.36585	0.515349		0.735961	1.04029
1.36773	0		0	0		0	1.13954		1.30825	0.5654		0.437207	0.697321		0.570887	1.3289
1.64365	0		0	0		0	1.32481		0.494088	1.14439		0.151989	0.843091		0.925935	1.40411
1.59855	0		0	1.2077		0	0.298267		0.733337	0.597008		0	0.878573		0.530517	0
1.43583	0		0	0		0.596452	0		0.939963	0.927535		1.1415	0.342684		0.88744	0.869662
0.769971	0		0	0		0.370914	0.489763		0.00435031	1.07359		0.982004	0		0.730861	0.803689
0.597772	0.0866527		0	0		0.0828505	0		1.19137	0.282065		0.159359	0.32221		0.589352	0.150945
0.337236	0		0.30282	0		0	1.48852		0.628641	0.264796		1.20948	0.252476		0.313536	0.890376
1.55551	0		0	0.374061		0.23004	0.764261		1.28972	0.996125		1.26265	0.686779		0.177299	0.494948
2.49533	0		0	0.379984		0.00606124	0.0784189		0.936215	0.581413		1.62998	0.282395		0.120156	0.26168
1.54713	0		0	0.279663		0	0.591507		0.723573	0.817065		0.992829	0.259123		1.19372	0.907842
1.22745	0		0	0.699823		0.143619	0.712025		0.522959	0.929189		1.02965	0.200859		0.775487	0.525956
1.33913	0		0	0.121823		0.709151	0.537981		1.1446	0.656726		0.904924	0.431657		0.884033	0.811976
1.16732	0		0	0		0	0		1.83713	0.617493		0.0172332	0.679516		0.603534	1.09638
1.73691	0		0	0		0	0.988642		1.61439	0.399663		0.580539	0.277955		1.14059	1.12236
0.909005	0		0	0		0	1.41935		0.101422	0.3725		0.951116	0.182825		0	0.823671
1.46329	0		0	0.150603		0	0.965213		1.9342	0.415213		0.758098	0.548934		0.971873	1.22699
1.89505	0		0	0.529872		0	1.09615		1.0682	1.39962		0.819221	0		1.70931	0.658359
0.995694	0		0	0.295415		0	0.371173		0	0.655084		0.885236	0.627237		0.0407815	0.960374
0.950237	0		1.04497	0.0282856		0.214529	1.38939		1.35589	0.158828		1.42855	0.0825642		0.348203	0.471552
2.57044	0		0.630465	0		0.0823436	0.0687501		1.71814	0.388289		1.13474	0		0.425346	0.865386
1.08255	0		0	0.0861161		0.399757	0.559296		0.609537	0.939553		1.26968	0		1.04964	0.524424
1.07189	0		0.0217566	0.100483		0.234233	1.36948		0	0.708341		1.39508	0.389113		1.28576	1.15277
1.93664	0		0.894026	0.39887		0.559767	0		2.37884	0.34249		0.811126	0		0.0540858	0.11559
1.93585	0		0	0.523776		0	0		1.77874	0.833037		1.14594	0.637824		0.322779	0.928123
1.10888	0		0.0810166	0.320853		0.647836	0.673101		0.66823	0.944455		1.01963	0.277709		0.126652	0.341746
2.1967	0		0.195027	0.101406		0.346509	1.27016		1.43174	1.50894		1.10739	0		0.757029	0.686732
1.33133	0		0	0.183368		0.149994	1.15168		1.37207	0.757093		0.698299	0.0248459		0.0757816	0.39068
1.3712	0		0	0.0591316		0.0933066	1.01759		0.759359	0.376285		0.238186	0.242253		1.6211	0.633007
0.684749	0		0	0		0.808609	0.884124		0.0207049	0.738585		0.0207049	0.103727		0.367808	0.698631
1.4134	0		0.381945	0		0.80824	0		2.25152	0.870949		1.10439	0.576217		0.763887	0
1.67439	0		0.0089362	0.0285794		0	0.975513		1.87906	0.625806		1.70748	0.871964		1.01824	1.26731
1.05566	0		0	0.222463		0	0.462024		1.49142	0.655142		0.846213	0.588253		0.13906	0.784979
1.08322	0		0.278916	0		0.151217	0.347728		0	1.08716		0.831337	0.347728		0.493836	0.484751
1.27628	0		0	0.492159		0	0		0.420441	1.35687		0	0.810476		0.226219	0.240987
0.889863	0		0	0		0.703314	0.231652		0	0.507858		0.35104	0.406338		0.185722	0.694456
1.69039	0		0.51818	0.373787		0	0.360135		1.77596	0.179865		0.910787	0.243634		0.00413151	0.983939
1.39743	0		0	0.40912		0	0.020018		1.64806	1.43863		1.41757	0		0.250974	0.698624
1.95206	0		0.129469	0.146282		0	1.3494		1.11917	0.675405		1.14589	0.4134		0.747314	0.938264
0.447098	0		0.423454	0		0.578304	1.15839		0	0.960152		1.3709	0.439226		0.0409122	0.910201
1.5404	0		0	0		0.132685	1.19394		1.04939	0.482829		0.723355	0.167669		0.584774	0.638939
1.4716	0		0	0.562112		0	1.03464		1.3121	0.845497		0.286288	0.650253		0.29789	1.01531
0.310528	0		0	0.628008		0	0.0407706		0.0174665	0.222886		0.60008	0.020593		0.450892	0.0799438
0.878141	0		0	0		0	1.2772		0	0.352011		1.15975	0.299027		0.507063	0.426569
1.90683	0		0	0		0.45274	0		1.32964	0.758599		0.401982	0.277789		0.240912	0.135884
2.34392	0		0	0		0	0.269661		1.7082	0.605319		1.1629	0.528521		0	0.432861
1.8531	0		0.503963	0.343426		0.147154	0.265078		1.78009	0.288096		0.8974	0.416079		1.24809	0.663178
1.09497	0		0	0		0.7542	1.02145		1.16927	0.358262		0.912479	0.172686		0.827133	0.300148
1.17616	0		0	0		0	0.882512		0.826225	1.325		0.0050253	0.194938		1.22469	0.102211
1.38199	0		0	0.178811		0.6005	0.614344		0	0.967601		0.507131	0.541111		0.544315	0.31469
1.54297	0		0.373981	0.745197		0.393057	1.54016		0.842143	1.15034		0.817728	0		1.05237	0.309618
2.19698	0		0	0.117988		0	0		0.392824	0.973005		0	0.539764		1.06309	0.729191
2.06042	0		0	0.433996		0.418417	0		1.75723	1.26121		1.04514	0.123251		0.40583	0.123251
1.41948	0.387337		0	0		0.0129242	0		1.02087	0.656437		0.687439	0.503798		2.08491	0.435561
1.04719	0		0.171636	0.463895		0.363551	0		0.876325	0		1.44624	0.645251		0.0533545	0.0412966
1.51998	0		0.301048	0.0209373		0.782717	0.396516		1.34544	1.3219		0.511575	1.12967		0.00984642	1.47342
2.07663	0		0.716746	0.536568		0.199571	0.800469		2.10186	1.16828		0.617992	0.643851		0.846271	0.847661
0.959416	0		0	0.463464		0	1.80253		0.253871	0.754028		1.11171	0.101829		0.856199	0.661632
1.64661	0		0	0		0.739989	0.925181		0.694468	0.31729		0.124102	0		0.350453	0.681371
1.34426	0		0	0		0.833118	0		0.942003	0.954347		0	0.2055		0	0.695051
1.82742	0		0	0		0	0.0275438		1.47177	0.788842		0.0074158	0.850356		1.24878	0.608569
1.5413	0.412545		0.746922	0		0.108745	0.177758		1.87398	0.727525		1.3608	0.784603		0.559299	0
1.52669	0		0	0.775383		0.217078	0		1.40882	0.492921		0.603408	0.252872		0.0839256	0.505396
1.26409	0		0	0.378027		0.752052	0.90996		0.963307	0.206771		0	0.555098		0.778138	0.365846
1.57111	0.0431742		0	0.732816		0.00582066	0.494535		0.517105	1.40815		0	0.644196		0	0
1.19551	0		0	0		0.500633	0.474537		0.844916	0.900457		0.17572	0.733923		0.970225	0.685498
1.83271	0.729349		0	0		0	2.41856		1.7614	0.370884		0.00517006	0.473244		0.905067	1.06253
2.31434	0		0	0.438351		0.175359	0.03602		2.04941	0.750772		1.11274	0.0535549		0	0.495818
1.23167	0		0	0		0.776328	0.568462		0.867732	0.819832		0.00531981	0.217998		0.673005	0.114927
1.50239	0		0	0.422812		0	0.409462		0.978111	1.27836		0.277598	0.794989		0.549335	0.382215
1.39601	0		0	0.435638		0.581041	0.022493		0.98293	0.801278		0.791166	0.770174		0.390031	0.022493
1.13849	0.353901		0	0.675508		0.352966	0		1.86262	0		0.244157	0.572123		1.24635	0.239181
1.94728	0		0	0.197227		0	0		0.322158	0.737214		0.871018	0.435058		1.23295	0.627052
1.78271	0.389348		0	0		0.785296	0.9983		1.86943	0.668873		0.567857	0.251234		0.189376	0.925551
1.54262	0		0	0		0.629125	0.914732		0.00556391	1.10478		0	0.52395		1.07897	0.4046
1.73267	0		0	0		0	0		1.56486	0.730879		1.54551	0.574574		0.0121457	1.01273
1.57335	0.290772		0	0.82309		0.748653	0.441089		1.0234	0.979527		0.580724	0.377053		1.22133	0.82309
1.2317	0		0	0.513969		0	0.0468777		0.416804	0.499512		1.29191	0.375653		0	1.04653
0.917517	0		0	0.022142		0.390426	0.444509		0.934213	0.718953		1.24077	0.841977		0.399888	0.400491
1.17365	0		0	0.378651		0.614614	0.726142		1.10049	0.537308		0.0912164	0.641698		0.788063	0.619424
1.21386	0		0	0		0.584433	1.45161		1.67059	0.119083		1.07791	0.086481		0.607164	1.0574
1.70447	0		0	0		0	1.06183		1.12124	0.383458		0.864419	0.442356		0.631852	0.563415
1.71874	0		0	0.329297		0.00607672	1.03914		0.502101	0.706206		0	0.386685		1.44375	0
2.44073	0.343416		0	0.0596484		0	0.764218		1.11177	0.491717		1.87308	0.65334		0	0.413562
1.50646	0.245067		0	0		0.121472	0.273634		1.19789	0.781561		0.976661	0.341675		1.14886	0.781561
1.16119	0.204167		0	0.592741		0	0.949927		2.0265	0.865081		0.625901	0.686579		1.46229	0.91814
2.17035	0.472529		0	0.545143		0	1.49328		1.42689	0.382523		1.50563	1.13873		0.225559	1.08187
2.01714	0		0	0		0	1.31535		1.92691	0.884021		1.29422	0.996423		0	1.29977
0.73855	0.0699281		0	0		0.489164	0.530726		0.677506	1.25588		0	0.651001		1.5866	1.13156
1.31618	0.353781		0	0.174793		0.405035	1.04603		0	0.625997		1.03654	0.174793		0.315401	0.659475
1.14187	0.24299		0	0.156375		0.216262	0.578213		0.626017	0.438326		1.51092	0.451884		1.38824	0.307255
2.5092	0		0.00499197	0.797179		0	1.08479		1.35003	1.09153		1.276	1.00025		0.258713	1.35539
1.75158	0		0	0.688689		0	1.28289		0.682217	0.699452		0.452242	0.810776		1.20009	0.902236
1.66926	0		0	0.3321		0.245799	0.606568		1.55563	0.0229058		0.819292	0.280946		0.895655	1.00714
0.832178	0.42703		0.162228	0.134023		0	0.744968		0.840898	0.52863		1.65289	0.705283		0.618144	1.06658
1.74864	0		0	1.20288		0	0.832792		1.06642	0.365627		0	1.14216		0.519883	0.295148
1.09678	0.169417		0	0.330961		0	1.03782		0.347179	0.330961		0.296389	0.526091		0.10724	0.67764
1.59628	0.670078		0.31158	0.726585		0.10015	1.01973		1.31377	0.478428		1.75394	0.478428		0.221423	0.897845
1.62007	0.733708		0.227595	0.448527		0.367904	0.96477		1.22749	0.709794		0.829957	0.349494		0	0.258747
1.23296	0		0	0.629631		0.202137	0.610766		0.388895	0		0.377723	0.351305		0.65975	0.313573
1.68107	0		0.420298	0.693507		0.48832	0.732235		1.27184	0.0259939		0.0307771	1.19123		0.1529	0.0760385
1.48787	0		0	0		0.22757	1.15538		0.517454	0.866854		0.808435	0.855643		0.33646	0.492653
1.92242	0		0.468897	0		0.763645	1.73554		1.42125	0.692942		1.35851	0.590016		0.671499	1.03863
0.974641	0.378498		0	0.199542		0.823038	0.934485		1.3238	0.530238		1.0112	0.613327		0.0790298	0.365814
1.71561	0		0	0.519891		0	0.762918		1.14017	0		0.341632	0.157398		0.672517	0.27503
1.82573	0.214365		0	0.43043		0	0.953136		1.47198	0.998191		0.0106034	0.0390724		0.384605	0.404179
1.49989	0		0	0.133516		0	1.92934		2.1272	0		0.00455216	0.587732		0.231163	0.522139
2.59214	0		0	0.462922		0	0.946325		0.970518	0		0.613073	0.586456		0.956394	0
1.8922	0		0	0.285189		0.721434	0.654426		1.2892	1.32764		0.552422	0.84159		0.122341	1.25508
0.432877	0		0.385147	0.037853		0.603831	0.795353		0	0.713744		1.29711	0		1.96894	0.9334
0.683606	0		0	0.281397		0.502253	0.454232		0	1.20891		0.707023	0.139753		0.102518	1.06467
1.12028	0		0.0890092	1.37854		0.438047	0.716822		0.936686	0.0675287		0.964104	0.0510692		1.03899	0.690904
0	0		0	1.04836		0.0189281	0.561963		0.739055	1.22764		0.0602502	0.444812		0.720635	0.677817
0.935829	0		0	0.893759		0.812505	1.4262		0	0.311627		0	0.548867		1.10331	0.677506
1.33811	0		0	0.0358542		0	1.64123		0	0.936661		0.939156	0.704152		1.47276	0.831132
0.952797	0		0	0.917787		0	0.738901		0.566014	0.370991		0	0.286678		1.60307	0.810871
1.60799	0		0	0.816649		0.466819	1.12323		0.522618	0.775969		0.508957	0.975993		1.68831	0.32995
1.20308	0		0	0.714519		0.261413	1.29751		1.74056	0.396645		0.00496705	0.0992302		0.226298	1.13821
1.36155	0.548958		0	0		0.597981	0		0.116754	0.0950764		0	0.311684		1.39146	0.0164871
1.63646	0		0	0.0445122		0.17661	0.659132		1.17314	0.464822		0.64261	0.293701		2.00888	1.18659
2.3426	0		0.0137208	0		0	0.180675		1.38578	0		0.801808	0		1.28018	0.818618
1.91628	0		0	0.891484		0	1.26215		1.35867	0.396315		1.38972	0.916106		0.00679526	1.15318
1.06178	0		0	0		0	1.78447		0.434302	0.423807		0	0.438715		0	0.651207
1.98616	0		0	0.720953		0	0.887577		1.53113	0		1.43906	0.545213		0.0155195	0.470437
1.3916	0		0	0.608333		0	0.273085		0.355518	0.454692		0	0.801948		0.228924	0.0995473
1.02467	0		0	0.828155		0.589124	0.706309		0.961574	0		0	1.1768		1.25295	0.0691679
2.1238	0		0	1.14629		0	1.77955		0.682516	0.668493		0.555152	0.881594		0.931453	0.0240994
0.838454	0		0	0.317713		0.831508	0.437291		0.348012	0.704194		0.955881	0.904621		0.492488	0.0486609
2.15849	0		0.256526	0.317334		0	0.437744		1.96394	0.859524		0.872808	0.23398		0.277516	0.594888
0.418761	0		0	0		0.0596487	1.06943		0.403087	0.724249		1.10644	0.381127		0.530475	0.888082
1.62803	0		0	0		0	1.47582		0.854387	0.32707		1.03828	0.457645		0.607792	0.698252
1.88118	0		0	0		0	0.940675		0.791106	0.627074		0.952731	0.354818		0.188114	0.796118
0.00473412	0		0	0		0	0.84872		0.0418213	0.0716308		0.345606	0.0183944		0.00944594	0.902844
1.37673	0		0	0.571679		0.750124	1.23832		0.806866	0.545733		0.981614	0.240749		0.888321	0.342385
0.689342	0		0.00444037	0.922645		0.152428	1.29387		1.10392	0		0	0.863548		0.529856	0.0470028
0	0		0	0.254753		0	0.664214		1.00075	0.487746		0	0.55935		0.294987	0.613156
1.89026	0		0.00429151	1.41979		0.531228	0.557044		2.25698	0.881239		1.89737	0.496327		0.117535	0
1.26862	0		0	0.917777		0	0.862492		0.548274	0.978636		0	0.935547		0.966482	0
1.19796	0		0	0.67143		0	0.805199		0.842979	0		0.0373728	0.131075		1.47151	0.941543
1.84234	0		0	0.566733		0.44073	1.68457		0.463546	1.05487		0.754996	0.97098		0.691203	1.24483
1.98769	0.181716		0	0		0.118219	1.13962		1.75578	0.366606		1.87067	0.680176		0.566788	0.56122
1.86493	0		0	0.506684		0.711785	1.44235		1.64142	0.022496		0.787211	0.464693		1.15531	0.821564
1.35993	0.0818357		0	0.139097		0	1.30461		0.68453	0.672624		0.640749	0.468091		1.30663	1.07843
1.56889	0.408757		0	0.301043		0	0.46547		0	0.708945		0.00496323	0.161807		1.18596	0.348633
0.850504	0.229793		0	0.210952		0	0.431889		0.15996	0.045901		1.16715	1.06551		0.634496	0.131828
1.32048	0.112226		0	0.193738		0.979889	0.970389		0	0.63067		0.372993	0.509879		1.14291	0.876068
0.870458	0.258504		0.00571917	0.216204		0.478533	0.172037		0	0.605047		1.13852	0.429407		0.51002	0.66197
1.43589	0		0.0935875	0		0.370099	1.23488		1.1143	0.657489		0	0.0726932		0.641866	0.899244
2.11437	0.348738		0	0		0	0.508464		0.823955	0.41572		0	0.431787		1.24982	0.789704
1.91214	0		0	0		0.53607	1.22392		1.39569	0.41101		0.347341	0.333164		0.661617	0.948373
0.924991	0		0	0.201592		0.62538	0.684477		1.78114	0.66169		1.47426	0.33792		0.597345	0.850191
2.12965	0.0707418		0.313465	0.0707418		0.22894	0.681777		1.66986	0.988051		1.24689	0.85182		0.739841	1.73897
1.67818	0		0.579113	0		0.26185	0.0495982		1.51414	0.774507		1.33426	0.786158		0.035489	0.163793
1.48066	0.49668		0	0.362207		0.271208	0.551094		1.72193	0.453834		1.46399	0.378073		0.734876	0.639728
1.26486	0		0	1.26294		0	1.04326		1.05854	0		0.759333	0.250974		0.827591	0
0.77341	0		0	0.0651068		0	0		0.545683	1.17632		0	0.652012		0.979245	0.459343
0.0337744	0		0	0		0.0242404	0.899001		1.89437	0		0.688777	0.191596		0	0.33736
1.16317	0		0	0.247391		0	1.21364		0	0.231613		0.865899	0.27822		0.145613	0.663864
0.76816	0		0	0.329038		0	1.20531		0.00514654	1.00571		0.729112	1.19356		1.25348	1.24535
0.78637	0.307541		0	0		0.692497	0.742049		1.14218	0.797625		0.0100373	0.131055		1.58902	1.50424
0.984699	0.442496		0	0.180235		1.179	0.919555		1.06423	0.84528		2.08823	0.731053		0.039498	1.09024
1.67157	0		0.442976	0.736918		0.129398	1.22818		1.72729	0		1.55892	0.51393		0	0.166853
1.64853	0		0.285392	0.426969		0.1947	1.54979		1.01197	0.391599		0.414606	0.742279		0.411137	0.616357
0.893281	0		0	0		0.0259004	1.00174		0.449008	0.631184		1.16769	0.872578		0.908205	1.35527
0.853792	0		0	0.198966		0.0505664	0.761145		1.0479	0.993652		0.0103199	0.246999		0.917944	0.610056
1.08303	0		0	0		0.542835	0.867782		1.72398	0		0.754292	0.397185		0.661874	0.925785
2.56907	0		0	0		0.957367	0.595937		1.20912	0.668095		1.14877	0.518164		0.0215704	0.966779
0.665017	0		0	0		0.491892	1.39656		0.0113837	0.289373		0.638165	0.448722		0.810004	0.877668
1.5094	0		0	0.192451		0	0.122744		0.0346902	0.244916		0.0953224	0.306849		0.880438	0.632078
0.444455	0		0	0		0	0.558898		0.127502	0.0574303		1.2116	0.752885		0.60805	0.67574
1.9446	0		0	0.259313		0	1.22534		0.985359	0.966306		0.956291	0.67403		0.604203	0.729066
2.10292	0		0	0.106243		0	1.06663		1.73735	0.459244		0.52611	0.289886		0.178046	1.4731
1.56534	0		0	0.905588		0	1.43326		1.77509	0.642066		1.57562	0.714737		0.25579	0.734566
0.939885	0		0.378025	0.569662		0.236308	0		0.15713	0.536549		1.27552	0.237981		0.66637	0.748166
1.27868	0		0.375237	0.195295		1.20499	0.64491		0.596417	0.140604		0.948241	0.343429		0.174071	0.791975
1.91565	0		0	0.104295		0.12764	0.974154		0	0.750286		0	0.659793		0.605722	0.715065
1.50673	0		0	0.355169		0.250337	1.43763		0.151957	0.947893		0	0.118154		1.14909	0.423145
1.5572	0		0	0		0	1.50454		1.01151	0.139309		1.08804	0.54583		0.828741	1.05005
2.21851	0		0.599635	0		0.315894	0.159331		2.04086	1.5278		1.54961	0.0190099		0.655496	0.632771
1.64975	0		0	0		0.848674	1.01037		0.674124	0.616803		1.17449	0.326334		0.711994	0.79686
1.4624	0		0	0.0435808		0.271693	0.368417		1.6391	0.271409		1.35749	0.321089		0.876415	0.683085
1.4002	0		0	0		0.00533776	0.623054		0.644216	0.208614		0	0.588536		0.237126	1.17414
1.44112	0		0	0.0572002		0	0.830772		0	0.579364		0	0.316874		0.823081	0.437889
1.56187	0.201132		0	0.249626		0	0.593399		0	0.535829		0.0368298	0.626414		0.0623303	0.637181
2.15081	0		0	0		0	0.188913		1.40594	0		1.6058	0.919302		0.0717446	0.500655
1.53494	0		0	0.485578		0	0.534019		1.04422	0.421528		0.649042	0.645753		1.48108	1.21772
1.29735	0.300669		0	0.0539042		0.414837	0.929118		0.398378	0.813309		0.933097	0.105051		1.56171	0.891986
1.39931	0		0	0		0	1.51302		1.85897	0		0	0		0	0.56816
1.63607	0		0	0		0.362769	0		0	0.674975		0	0.729052		0.724697	0.646799
1.33344	0		0	0		0	0.193087		0.947416	0.0564633		0	0.327325		0.66499	0.987511
1.01448	0		0	0.942065		0.139871	0		1.47931	0.76509		0.766666	0.637429		0.531922	0.0388622
1.15144	0		0	0.159494		0.922248	1.24866		0.819823	0.486629		0.690471	0.121941		0.643348	0.657224
1.57597	0.0966738		0	0.13287		0.00842494	0.884186		0.619142	0.700624		0.493085	0.45006		0.81439	1.22839
1.12217	0.0564861		0	0.19316		0.125834	0.889301		0.414264	0.0924454		0.89309	0.407887		0.417315	1.0021
1.72757	0		0	0.0198646		0.729534	0.949723		0.00588438	0.508073		1.61911	0.483635		0.127284	0.694726
1.51081	0		0	0		0.336531	1.02965		1.10021	0.420864		1.23036	0.224082		0.00438687	0.766031
1.56057	0		0	0		0.423482	1.02229		1.75657	0.318948		1.51918	0.0942763		0.0856709	0.773153
1.42483	0		0.206232	0		0.345833	1.34245		1.76494	0.480402		1.41832	0.0210434		0.106406	0.10105
1.78216	0		0	0		0.00453262	1.12248		0.962134	0.861973		0.0701663	0.700871		0.636794	0.375653
1.47668	0		0	0.16496		0.472364	0.517323		0	0.660927		0.109056	0.430508		0.366354	0.377292
0.645788	0		0	0		0	1.15101		1.13384	0.317788		0.00844545	0.570388		0.739112	0.790902
1.87163	0		0	0.041969		0	1.52615		1.17902	0.845322		0.342324	0.686037		0.546029	1.29677
1.75991	0		0	0.265165		0	1.21316		1.30536	0.501181		1.17062	0.141346		0.543952	0.804811
1.06721	0		0.00525486	0.0356354		0	1.52815		0.774566	0.0179764		1.51189	0.654972		0.0311228	1.06003
2.60907	0		0	0.107233		0	1.09853		1.0868	0.278173		2.18747	0.674038		0.701705	0.664377
1.2375	0		0	0		0.522933	1.10125		0	0.675281		1.31359	0.558498		0.800351	0.373468
1.32781	0.26166		0	0		0.0116073	0.839829		1.11096	0.768467		0.317433	0.321243		0.723878	1.14214
0.955423	0		0	0.0936435		0.29246	0.671484		0.449965	0.56577		1.06555	0.238987		0.626429	0.708413
0.0341501	0.121969		0	0.575666		0.584479	0.847692		1.54594	0.807188		0.260648	0.0363923		0.862783	0.782074
2.53501	0		0	0.22695		0	0.702636		2.05517	0.208319		1.78183	0.679427		0	0.593671
1.25502	0		0.426674	0		0	1.51781		0.783377	0		1.31302	0.213079		0.916378	0.821439
0.561032	0.329939		0	0.28687		0	0.436471		0	0.964001		1.31361	0.397839		0.0406383	0.691523
0	0		0	0		0.314938	1.13472		0	0.580088		0.755524	0.170759		0.772484	1.20534
1.85786	0		0	0.401741		0	0.612285		1.14904	0.822974		0.392263	0.566584		0.957549	0.666622
1.4996	0		0	0.362043		0	1.43922		0.770092	0.646515		0.915674	0.567275		1.11024	0.435235
1.619	0		0	0		0	1.26261		1.75756	0.264012		0.766836	0.572191		1.47375	0.645233
0.52498	0.513007		0	0.594703		0	0.995558		1.0705	0.513007		0	0.115		0.991126	0.340924
1.1323	0		0	0		0	1.08861		0.631528	0.196155		0.817023	0.592086		0.708372	0.274005
1.75985	0.131053		0	0		0	0.980123		1.39521	0.714143		0.679528	0.539822		0.574493	1.1709
0.995278	0		0	0		0	1.29047		0.640326	0.668236		0.921573	0.77412		0.632501	1.13129
1.60417	0.0695708		0	0.420254		0.017056	1.11033		0.872709	0.542603		0	0.847106		0.568435	1.13957
1.58845	0.41846		0	0.178027		0.432802	1.22473		1.64988	0.432607		0.548618	0.159741		1.01384	0.922495
1.9989	0		0.00529016	0.112361		0.499022	0.524562		0.952142	0.305093		1.03084	0.0689198		0.77819	0.846671
1.51725	0		0.650424	0		0	0.795352		0.655012	0.333803		0.507319	0.100453		0.975344	1.80373
1.90107	0.278497		0	0.386804		0	0.766553		0.583015	0.424575		0.540907	0.360807		1.52685	1.11192
1.61491	0		0	0		0.237831	1.0885		1.13295	0.489259		0.0283612	0.377743		0.912725	1.03561
1.40112	0		0	0.46594		0.670624	0.782541		0.409566	0.0375762		0.506649	0.477883		0.598266	0.951302
1.53785	0.349088		0	0.166904		0	0.954911		1.63663	0.556598		0.27929	0.50314		0.996067	0.961877
0.278015	0.80038		0.12871	0.126103		0.417996	1.04069		0.709385	0.738115		0	0.396892		1.36613	0.721924
0.202916	0.102881		0	0		0.0998326	0.908625		0.898047	0.716606		0.545171	0.543716		0.639155	1.63622
1.66524	0		0	0.266549		0	0.911911		1.01856	1.08087		0.583476	0.567373		1.2453	1.02081
1.07822	0		0	0.899707		0	0.321308		0.836923	1.32102		0.136764	0		1.0996	0.616587
1.6154	0		0	0		0.535442	0.0435912		0.428256	0.0646943		0.308187	0.125456		1.70068	1.19228
1.82658	0		0	0		0.666223	0.562351		1.07911	0.531882		0.0563536	0.33913		0.00961557	0.967918
1.50084	0		0	0		0.653925	1.52722		1.36182	0.345037		0.225375	0.757583		0.793145	1.10151
1.23105	0		0	0		0.449784	1.36407		0.211822	0.403307		0.432924	0.60942		1.12198	1.22827
1.62459	0		0	0.165566		0.607821	0.883965		0.679287	1.05801		0	1.24727		0.640216	0.554028
1.51621	0		0	0		0.368599	1.14827		0.596767	0.329207		0.0724878	0.812861		0.988118	0
1.48832	0.839745		0	0		0.665918	0.328709		1.49844	1.56067		0.984795	0.328709		1.1842	0.616523
0.605705	0.336191		0	0.384652		0	0.755803		0.312461	0.679532		0.378393	0.643672		0.944658	0.160197
1.37326	0.883613		0	0.503929		0.727727	0.503929		0.578857	0.592274		0.58672	0.12314		0.776408	0.215308
1.11269	1.03868		0	0		0.598321	0.326836		1.17467	0.654137		0.0101862	1.11194		0.749514	0.176712
1.07775	0.290615		0	0.263709		0.40013	0.0348844		0.0059823	0.868989		0.185656	0.193096		1.1217	0.354873
1.56844	0		0	0		0.336838	0.693751		1.50316	0.771088		0.778705	1.25363		1.37141	0.133682
1.56909	0.659687		0	0.0185113		0.465477	0		0.806008	0.408435		0.245058	0.408435		0.781867	0
0.616324	0		0	0		0	2.1903		0.637155	0.570277		0	0.835124		0.735258	0.0690711
1.52112	0		0.00559147	0		0	1.3272		1.13407	0.554107		0.719857	0.340762		0.540993	0
1.59132	0		0	0		0	0		2.03408	0.448275		0.500716	0.0207321		1.1213	0
0.861507	0.352847		0	0		0	0.486251		0.0272907	0.0495267		0.651558	0.506852		1.05825	0
0.444325	0.163876		0	0.0496248		0.465621	0.567103		1.31642	0		0.00557878	0.650125		0.150346	0.476558
1.17985	0.215242		0	0.0883495		0.267205	0.85382		1.62492	0.907419		0.888288	0.542606		1.19519	0
1.19405	0		0	0		0	0.530592		1.77993	0.156732		0	0.712608		0.539363	0
0.971386	0.10168		0	0		0.300534	1.08111		0.332964	0.941034		0	1.1512		0.901595	0.10168
1.03124	0		0	0		0.439063	0.910232		0.930576	1.4376		0.0232846	0.0198675		0.975977	0
0.988399	0.540724		0	0.255244		0.180813	0		1.63864	0.433589		0.457897	0.75346		0.641208	0
1.06889	0.269181		0	0.704683		0	0.340337		1.57068	0		0.724595	0.787073		0.27482	0
1.85965	0		0	0		0.0286299	0.937686		1.69	0.619945		0.258725	0.673488		0.996482	0
1.80086	0.194715		0	0.226377		0	0.748537		0	0.641297		0.65026	0.384591		0	0.329911
1.56941	0		0	0.0401352		0	0.426815		1.76642	1.0732		0.725163	0.954398		1.71214	0.169136
1.80275	0		0	0		0.0148199	0.896477		1.15369	0		0.433382	0.876547		2.18528	0
1.80977	0		0	0.378074		0.824758	0.31913		1.52006	0.745221		0	0.764852		2.23657	0
1.10222	0		0	0.270127		0.00495277	0.869814		0.669516	0.854407		0.39313	0.773598		0.61734	0
1.39072	0		0	0		0.0936164	1.10847		0.891067	0.796531		0.302545	1.01232		0.736847	0.175876
0.331654	0.0560362		0	0		0.936672	0.325151		1.03192	0.580925		0.250937	1.01098		1.80963	0.491029
1.52153	0.231478		0	0.193183		0.0041775	0.508618		1.81426	1.08698		0.80234	1.17848		0.0957371	0.564009
1.69839	0.277807		0	0.594018		0	0.82458		0.404745	0		1.91112	0.385039		1.09997	0
1.88441	0		0	0.303451		0.158515	1.17292		0.875224	0.0408625		1.91316	0.583594		0.0777316	0.117896
1.62626	0		0	0.0196289		0.393208	1.47019		0.444927	0.819191		1.11668	0.98766		0.716384	0.441501
1.80484	0.702467		0.181807	0		0.232972	0.335495		1.61847	0.845342		0.941406	0.235669		0.526262	0
1.96785	0		0	0.282758		0.527743	0.465177		1.38413	0.356908		0.867359	1.24453		0.519223	0.0202182
1.06482	0		0	0.948785		1.04214	0.892958		0.365611	0		1.17542	0.588509		0.384767	0.851082
0.496975	0		0	0		0.662568	0		0	0.412701		0.638046	1.07413		0.0503958	0.150622
2.33624	0.219583		0	0		0	0		1.29001	1.16628		0.856182	0.801009		0.562429	0.28323
1.78928	0		0.686627	1.11139		0	0.415148		1.21634	0.800705		0.8076	0.514577		0.368735	0
1.17537	0		0	0.132573		0	0		1.82486	1.17177		0.519709	0.758044		0.606791	1.04483
1.08926	0.339478		0	0		0.377421	0.634151		0.586031	0.176038		0.883797	0.749717		1.1808	0.869566
0.598639	0		0	0		0	0.938611		0.738529	0.0749418		0.717701	0.72757		1.42866	0.0749418
1.63331	0.431986		0	0.616284		0	0		1.24316	0.0604777		0.303415	0.809542		1.02148	0.582042
0.752889	0		0	0.27798		0.441086	0.517972		0.0692358	1.77834		0.799078	0.448216		0.599953	0
2.37602	1.21981		0	0		0.413481	1.07997		1.01004	0.534808		1.20085	1.04949		0.791043	0.805341
1.68503	0.149039		0	0		0	0.894644		1.3732	0.9405		1.08566	1.09009		0.404904	0.0227001
1.72903	0.394259		0	0.913804		0.00569912	0.394259		2.14393	0.709253		1.6433	1.15524		1.28582	0
2.21331	0		0	0.0652752		0.195454	0.936647		0.742906	0.0861199		0.213969	0.804972		0.610161	0
1.06251	0		0	0.808813		0	0.539618		0.854217	1.11188		0.759014	0.235029		1.20488	0.0764827
1.87143	0		0	0.117137		0	0.592098		0.999538	1.66141		0	0.912798		1.33485	0
1.90307	0.241839		0	0.420226		0	0.387004		1.4008	1.19034		0.00560638	1.01736		0.880105	0
0.917077	0.15457		0	0.231128		0.063082	0.824846		0	1.02353		0.811016	0.627502		0.0872412	0.406443
2.39363	0		0	0		0	0.176891		1.65255	0.156417		0.327558	0.291644		1.06292	0.531475
2.14967	0.670349		0.224508	0		0	0.874402		2.00086	0.583267		1.2547	0.814346		0.0152931	0.350116
2.15613	0.318647		0.0155508	0		0	0.905107		1.48418	0.767635		1.19033	0.86945		1.21388	0.0830534
1.36616	0.25105		0.657209	0.25105		0.0933368	0.198457		1.29908	0.859093		1.1166	0.687047		0	0
1.08813	0		0	0.179556		0.853583	0.103702		2.31893	0.901873		0	0.392574		0.566056	0.266935
1.97006	0.0213294		0	0		0	0.0626699		0.00435171	1.00235		0.0215716	0.485628		1.04549	0
0.179955	0.52824		0.00447097	0.133904		0	0.977569		0.106182	0.837254		1.08458	0.985241		0.183691	0
1.82998	0.705295		0.210121	0.0445247		0	0.82192		0.884949	0.186387		1.01385	0.908158		1.34177	0
1.15276	0		0	0		0.840053	1.56679		1.12038	0		0	1.52859		0.913993	0.230636
1.67271	0.249398		0	1.15848		0	0.368186		1.57514	0.776327		0.00479581	0.82182		0.461526	0
1.14708	0		0.0777238	0		0	0.650269		0.763513	0.755695		0.00474309	0.593071		1.24207	0.277294
0.158692	0.58631		0	0.65333		0.0249762	0.72824		0	0.0486321		0	1.07961		0	0.0246117
1.12052	0		0	0		0.0050644	1.15303		0	0.894118		0.929534	1.01529		0.311566	0.154223
1.95108	0		0.0042932	0.775063		1.09739	0.0653588		0.438714	0		0.421927	0.764637		1.40939	0.488821
1.98186	0		0	0		0	0.44504		0	0.0438678		0.810107	1.00302		0.994779	0.273007
1.32289	0		0.234758	0.0805227		0.612981	0.620306		0.488232	1.37519		1.0894	0.944781		0	0.0996795
0.628719	0		0	0		0.465846	0.680583		0.841666	0.901195		0.107713	0.178151		0.766449	0
1.23362	0.190001		0	0		0	0.525041		0.258502	1.05892		0	1.14908		0.832017	0.420766
1.98507	0		0	0.834608		0	0.986736		1.5905	0.365786		0.890921	0.190875		0.00476396	0.225037
1.56339	0.933188		0	1.2749		0.202655	0.666597		1.82915	0		0	0.643707		0.748788	0.0431307
0.337518	0		0	0.243099		0.576357	0		0.0750651	0.0209479		0.719002	0.504547		0.181307	0
1.46076	0.625674		0	0.572614		0	0		1.34455	0.625674		0.440152	0.224096		1.19915	0.160333
1.80644	0.154142		0	0.606107		0	0.693116		1.17156	1.11919		0.686785	0.782725		0.816241	0.117776
1.56828	0.203648		0	0.282356		0.418722	1.17359		0.918604	0.43962		0	0.337572		0.158568	0
1.77192	0.66124		0	0.57503		0.766219	0.772779		1.47992	0.61289		0.00443654	0.803951		1.10039	0.260176
0.630425	0.444446		0	0		0.800298	1.03248		1.16678	1.06268		1.3173	0.918961		0.298471	0.194942
2.34931	0.317526		0.373637	0		0	0		1.24032	0.514443		0.719847	0.514443		1.80052	0.202316
0	0		0	0.361689		0.453496	1.16332		0.795992	0.96853		1.05815	0.502971		0.361685	0.476267
0.828808	0.45615		0	0.494644		0.146166	0		0	0.8241		0.33341	1.09248		1.02916	0
2.21341	1.0373		0	0		0	1.35958		0	0.820931		0	0.280953		1.43286	0
1.122	0		0	0		0.192112	0.556947		1.0816	0		0	1.07922		0.581316	0.556947
1.79227	0.530034		0.0686694	0.654232		0.335867	0		1.08987	0.600927		0.741479	1.27293		0.595925	0
0.905245	0.424542		0.654482	0		0	0.424542		1.14025	0.65848		0.703405	0.456957		0.218115	0
1.03005	0		0	0		1.01462	1.28698		0	0.534593		1.09128	0.241834		0.854797	0.167536
1.19646	0		0	0		0.264076	0.0972852		0.158675	0.503147		0.790137	0.313225		0.158675	0.168826
1.78716	0		0	0		0.0163668	0.480728		1.56879	1.13891		0.610621	0.815008		1.32913	0
1.23382	0		0	0.049117		0.547025	0.590833		0.970941	1.51495		0.261025	0.562553		0.93887	0.733511
1.72092	0.349787		0	0.575325		0	0.961355		1.2005	0.363745		0.198893	0.691676		0.471112	0.335632
2.03056	0.388681		0	0		0.259023	0.354193		1.71356	0.300123		1.61545	0.587818		0.709291	0
1.18249	0.301999		0	0		0.861392	0.648416		0	1.11617		0.00558459	0.938214		1.40475	0.0796938
0.539955	0.702095		0	0		0	0.462578		0.633601	0.940357		0	1.16137		1.83064	0.448232
0.49334	0		0	0.334173		0	1.02444		0.505342	1.0556		0.64953	1.04014		0.875116	0
1.74954	0.653262		0	0.182647		0	0.432468		0.225554	0.0583796		0.465625	0.901321		1.29979	0.507595
1.49446	0		0	0		0	0.310619		0.218468	0.821956		0	0.184296		1.09806	0.150055
0.850596	0		0.463901	0.307734		0	0.630381		1.4773	1.23977		1.21072	0.488944		0.720891	0
1.83995	0.430592		0	0.401002		0	0.238295		1.54279	1.15534		0.758053	0.527761		0.289554	0.0221759
2.02104	0.597283		0.667825	0		0.375032	0.92909		1.98879	1.15232		1.63302	0.527446		1.05084	0.385178
0.591441	0		0	0		0.228274	1.3704		0.353663	0.164324		0.825118	1.05269		0.343794	0
1.50194	0		0	0.261268		0	0.746212		1.16638	1.07866		0.158327	0.736048		1.59851	0
2.13357	0.356684		0	0		0.0111	0.0441261		0.936681	0.606833		0.96259	0.556401		0.561572	0.239556
1.79043	0		0	0		0.445711	0.941065		0.928694	0.462823		0.860017	0.964545		0.282469	0.0200917
1.39666	0.915643		0	0.0208843		0.80629	0.437418		1.82505	0.464307		0.405465	0.612023		0.634149	0.306578
2.24128	0		0	0.972133		0	0.0829653		1.48113	0.297149		1.73068	0.213405		0.358593	0.344224
0.809785	0		0	0		0.270001	0.0383073		1.44712	0.86974		0.210557	0.681207		1.50751	0.397521
1.48614	0.236929		0	0.0189165		0	0		0.026017	0.964396		0	0.65057		1.20379	0
1.66972	0.22028		0	0.49262		0	0.45425		1.25294	1.20628		1.10849	1.061		0.413883	0.0597832
0.898927	0.715905		0	0		0.853555	0.659981		0.745296	1.26333		0	1.0306		0.365808	0.413361
1.08647	0		0	0		0	0.446937		0.964625	0.969267		1.21784	0.167021		0.752094	0.119777
1.638	0		0	0		0	0.0533015		0	1.47616		0.153403	0.676615		0.672556	0.0358481
0.200193	0		0	0.956503		0	1.14805		1.70308	0.902279		0.195864	1.02451		0.509774	0
1.54569	0		0	0		0.23889	0.141256		1.32699	0.61264		0.0783126	0.526842		1.04667	0.329402
1.193	0		0	0.229591		0	0.327235		0.274837	1.3452		1.1554	0.740442		1.57179	0
1.63363	0		0	0.716002		0	0.427219		1.52385	1.27703		0	0.842687		1.24761	0
1.25032	0		0	0		0.202496	0.840343		0.94087	1.07077		0	0.771126		0.854935	0.420676
2.08539	0.340881		0.488277	0.468334		0.294253	0.468334		1.54648	1.26206		1.84642	0.526446		0.479844	0
1.6796	0		0.279395	0.0543772		0.261174	0.75031		1.07228	0.874247		1.23239	0.638757		0.642553	0
1.30484	0		0.168636	0		0.194891	0.0194967		0.632179	1.56033		1.14296	0.51246		0.472219	0.163132
1.46017	1.06333		0.226909	0.105737		0.426958	1.06333		0.46549	1.29186		1.41282	0.731465		0.88832	0.925941
1.66327	0		0	0		0	0.774438		0.641116	0.488373		0.924939	0.290667		0	0.106555
1.88194	0		0	0		0.623848	0		1.39147	1.40754		0	0.244002		0.114636	0.261884
0.527603	0		0	0.716532		0	0.247632		1.61742	0.811675		0.420476	0.788724		0.733458	0
0.0686447	0.293725		0	0		0.521598	0.293725		0.327558	0.93521		0.498324	1.01254		1.03041	0.14784
1.23625	0.361758		0	0.0226804		0.152556	0.361758		0.470236	0.509973		0.802079	0.206522		0.167602	0.56361
2.13671	0.0424197		0	0		0.306941	0.914274		1.02024	0.832895		1.97837	0.832895		0.712208	0
1.38969	0.797171		0	0		0.00655839	0.895803		0.289363	0.313406		1.41718	0.732957		0.769214	0.959479
1.166	0.512168		0	0		0.00573647	0		1.19776	0.582509		0.0880542	0.249807		0.164108	0.604898
0.863516	0		0	0.997483		0	0.356179		0.677834	0.815837		0.0313969	0.106695		0.968133	0
1.40387	0		0	0.717395		0	0.226597		1.43896	1.407		0.815308	0.888128		0.854725	0
1.25757	0.613114		0	0.383642		0.367073	0		1.60996	0		0.881147	1.35391		0.0951176	0
1.65399	0		0	0		0.306613	0.534449		1.1549	1.2987		1.06225	0.635614		0.573706	0.18387
1.10771	0		0	0		0.119079	0.335568		0.636202	0.214499		0	0.8136		0.694902	0.848339
2.43055	0		0	0.862271		0	0.941584		0.423025	0.757965		1.47224	1.02213		0.652386	0
0.980212	0		0	0		0	0.0897981		1.69964	0.808653		0.99211	0.131844		0.453713	0.0459067
2.8209	0.416464		0	0.387668		0.43259	0.666332		1.48792	0.177076		1.62568	1.15499		0.291383	0
1.58649	0		0	0		0.410085	0.383315		0.435633	1.10891		0	0.201646		1.13952	0
1.41052	0		0	0		0.0170339	0.147738		0.840326	1.5963		0.691361	0.860632		0.595082	0
1.47792	0		0	0		0	0.373341		0.0200006	0.338109		0.149812	0.744936		1.26424	0
1.65931	0		0.0122599	0.272189		0.680312	0.783342		1.29192	0.908563		0.883175	0.957774		0.0656422	0
1.27053	0		0.149962	0.376798		0	0.532987		1.68172	1.36202		0.240438	0.921729		0	0.40066
0.966683	0		0	0.61415		0.398346	0.510637		0.943723	1.25961		0.570892	1.06405		1.21113	0
1.41328	0		0	0		0.954704	0.430432		1.95859	1.39034		0.205608	1.39034		1.29721	0
1.64769	0		0.359247	0		0	0.017158		0.852862	0.686347		0.699779	0.526055		0.873782	0.451776
0.155377	0		0	0		0.883252	0.450658		0.855059	1.24334		1.00851	0.484626		0.0133583	0
1.2828	0		0	0		0	0		0.682681	1.34308		0	0.0296704		1.26054	0.471439
0.918301	0		0	0.565781		0.980002	0.041399		0	0.846486		1.13285	0.226025		0.0497592	0
1.70789	0.326435		0	0.634231		0	0.681276		0.422608	0.820479		0.51284	0.859685		0.369275	0.29312
0.221539	0		0	0.656775		0.431835	0.190352		0.672392	1.21383		1.13308	1.29086		0.556175	0
1.64067	0		0	0.653235		0	0.198411		1.8257	1.65549		1.15114	0.886456		0.485129	0
1.91049	0.338247		0.377216	0.136591		0	0		1.89769	0.894166		1.58584	0.256747		1.03113	0.0534314
0.859633	0		0	0		0.335836	0.743878		0.541392	1.12173		0.00530735	1.12173		0.484036	0
1.74378	0		0.00566257	0.21837		0.0168924	0.303785		1.5565	1.14099		0.800469	0.510176		0.772013	0
1.18356	0		0.00547164	0		0.627208	1.08427		0.569922	0.561215		1.54597	0.311628		1.06604	0
0.919539	0		0	1.08769		0.160798	0		0.170336	1.36312		0	1.0129		0.764529	0
0.70167	0		0	0		0.0591226	0		0	1.16196		1.06689	1.3129		0.99523	0
1.37988	0		0	0.675973		0	0.452146		1.10033	0.93123		0.833974	1.07565		1.3707	0
1.15613	0		0	0		0	0		0.00967447	1.70554		0	0.418988		1.25923	0
1.82695	0		0	0		0.749638	0.639357		1.64369	0.234684		0.853897	0.501442		0.0942489	0
1.80328	0		0	0.278923		0.237187	0.374437		1.62114	0.994416		1.417	0.264502		0.323819	0.0904065
2.13063	0		0.15299	1.05642		0.227179	0		2.01668	1.52161		1.24966	1.32446		0.890302	0
1.04545	0		0	0.0848779		0.73047	0.414615		0	1.28215		1.236	0.980347		0.978846	0
1.1407	0		0	0.67837		0.606933	0.866833		1.18396	1.47517		0.801985	1.20897		0.0147101	0
1.06788	0		0.016853	0.205212		0.253812	0.760304		1.45928	1.17554		1.34503	0.696168		0.64524	0.157721
1.99907	0.292751		0	0		0.0055296	0		1.37649	1.1538		0.311861	0.593206		0.945755	0
2.04503	0		0.53535	0.0182954		0.572953	0.48721		1.08837	1.7643		1.59714	0.314282		0.592882	0.353938
1.58202	0		0	0.5396		1.00382	0.476313		0.979314	1.31776		1.78882	0.644309		0.466612	0.321141
1.75553	0		0.264727	0.747499		0	1.12073		1.78489	0.285208		1.29739	0.360651		0.240372	0.11475
1.41849	0		0	0.280675		0.342439	0.871876		0.897749	1.06678		0.669306	0.60903		1.08149	0.717015
1.09095	0		0	0.307723		1.03802	0.833418		0.0612783	1.23028		1.45854	0.565703		0.664443	0.470341
0.819448	0		0	0.815115		1.01591	0.379664		0.28979	0		0.93281	0.173041		0.876529	0.350524
1.15281	0.613804		0	0		0.0287111	0		1.65316	1.50373		1.45525	0.950207		0.691221	0.0631515
0.0597303	0		0	0.503945		0.696734	0		1.2531	1.28674		1.2547	0.959654		0.0437908	0
1.38651	0		0	0		0.732516	0		1.65764	0.992703		0.512082	0.620732		0.376567	0.753769
1.38991	0		0	0.937458		0	0.480464		1.10083	0		0.537008	0.494495		1.28856	0.0662895
1.31201	0		0	0		0.260458	0		0.834192	1.01457		0	0.930165		0.151992	0.512696
1.45965	0		0	0.0500797		0	1.16573		0	1.32109		0	0.719192		1.21446	0
1.82856	0		0	0		0.822204	1.01282		0.630018	0		0.829888	0.83036		0.051319	0.240082
0.919433	0		0	0		0	0.402146		1.7492	1.08555		0	0.221153		1.45569	0.947901
1.07884	0		0	0		0	0.582376		1.27479	0.472711		0	0.299109		1.05086	0.443307
0.450424	0		0	0		0	0		0	1.25172		0.182111	0.660691		0.933542	0.752997
0.82742	0		0	0		0	0.491622		1.2654	1.0961		0	1.42907		0.154099	1.15988
1.88628	0		0	0		0.77458	0.900742		2.1053	0.390883		0.392939	0		0.230142	0.571302
0	0		0	1.41098		0.67966	0		0.858722	0.435681		0.00584557	0.191744		0.559858	0.0346205
0.590121	0.221891		0	0.585002		0.252198	0.392251		0	0.124427		0.987773	0.664776		0.57294	0.800034
0	0		0	0.0242245		0	0.632723		0	0.4781		0.282438	0.924361		1.16296	0.853826
1.93926	0.526615		0	0		0	0.390732		1.28685	1.29562		1.03574	0.797084		0.121197	0.818399
2.28251	0		0	0		0.610574	0		1.018	0		0.57845	0.445956		0.860961	0.22296
1.81144	0.821172		0	0.172339		0	0.814787		0	0.935328		0.0112745	1.10228		1.13792	0.74859
0.742199	0.18706		0	0.0225982		0.714236	0.376455		0.625326	1.33194		0.96048	0.600373		1.07932	0.562031
0.808351	1.10545		0	0.249663		0	0.596266		0	0		0.217625	1.08769		1.30525	1.51401
1.42313	0.397997		0	0		0	0.218669		0	0.737997		1.37965	0.559361		0.776319	0
0.838523	0		0	0.375904		0.98082	0.308398		1.09646	0.687463		0.565867	0.968921		0.233165	0
0.786505	0		0.0869237	0.401299		0.175395	0.890524		1.04964	1.3769		1.53201	1.03335		0.510405	0.0721465
1.14118	0		0	0		0.312997	0		0.243446	1.98707		0.943007	1.24732		0.252409	0.658794
1.01987	0.560198		0.0211979	0		0.224529	0		1.73716	0.922095		1.64643	0.291145		0.337687	0.783496
0.852047	0.577113		0	0.559053		0	0.726459		0.604429	0		0.644248	0.10576		0.70728	0.0158109
1.31671	0		0	0.56808		0.157031	0.880488		1.60859	0		0	0.611571		1.09257	0.0194223
0.552004	0		0.444761	0		0.501349	0.323862		0.0869387	0.764243		0.377885	0.297161		0.346267	0.447616
1.45278	0		0.679949	0		0.534925	0		1.29473	0.829983		1.24438	1.22286		0.445954	0.593578
0.862511	0		0	0		0	0.157238		2.06126	0.726621		0	0.763363		0.39932	0.183348
1.06531	0		0	0		0.166462	0		0	0.976987		0	0.0667408		1.44457	0.603343
1.0914	0		0	0		0	0.0231162		0.77059	1.38463		1.01515	0		0.77059	0
1.20587	0		0	0		0	0.471409		1.05773	1.23249		0	0.255217		0.791965	0.521955
1.4976	0		0	0.0209992		0	0		1.89446	1.27787		1.3695	0.637259		0	0.0617192
1.80064	0		0.414158	0		0.313262	0.81006		1.91106	0.231734		1.66466	0.513177		0.0745957	0
2.0502	0		0.71118	0		0.554047	0.754642		1.97777	0		1.06047	1.31627		0.326848	0.984979
0.609747	0		0	0		0.780125	0.811834		0.643792	0.84871		0	0.675189		0.934796	0
1.73939	0		0	0		0	0.110569		0.19044	0.916448		0	0.127865		0.994909	0
1.95439	0.290885		0	0.780076		0	0.490432		0.810344	0.863542		0	0.689005		1.33074	0.290885
1.62444	0		0	0		0	0.0565241		0	1.52724		0.888699	0.725674		0.25398	0
1.00057	0.0363011		0	0.441167		0.108545	0.327982		1.27444	1.10963		0	1.07238		0.847419	0
1.46065	0		0	0		0	0.436173		0.407416	1.05049		0.727253	0.756123		0.271816	0.42432
1.17477	0		0	0		0	1.02244		1.57954	0		0.371269	0.78913		0	0
0.704448	0		0	0.393847		0	0.729984		0.468645	0.719354		0	0.284499		0.228662	0.75091
1.25873	0		0.00469224	0		0.444486	0.43744		1.88016	1.38318		1.55187	0.234445		0.0725553	0
1.06875	0		0	0		0.110463	0.707515		1.10808	0.689873		1.21209	0.30366		0	0
1.61419	0		0.214531	0.0927932		0.467349	0		1.76712	1.36036		0.925679	0.383034		1.23168	0
0.771367	0		0	0.214307		0.871551	0		0.623296	1.01979		1.25206	0.261405		0.0974166	0.517112
1.36079	0		0	0		0.642483	0.0916985		0.432248	0.788652		1.60661	0.570004		0.890671	0
1.71763	0		0	0.42546		0	0.487657		0.695837	0.46324		0	0.46324		0.880251	0.601526
1.72868	0.547711		0.674082	0		0.560376	0.856284		1.73335	0		0.773132	0.136154		0.575317	0.0408287
0.887395	0		0	0.222675		0.848336	0.78718		0.159381	0.426629		0.00662357	1.0746		0.176237	0.0327143
1.8327	0.199229		0	0		0	0.398718		0.661053	0.766071		0.592114	1.23825		1.16984	0.913983
0	0.877943		0	0.174735		0.440123	0		0	0.297989		0.728295	1.0915		0.833566	0.803064
0	0		0	0.821012		0.313856	0.0170537		0	1.35831		0.332915	0.782439		0	0
1.41352	0.397989		0.237186	0.236362		0.730473	0.16361		1.41352	0.270845		0.889844	0.397989		0.0521515	0
0.322876	0		0	0.169255		0.733477	0.681801		0	1.38781		1.43899	1.23383		0.925994	0
1.74227	0.681243		0.00585597	0.11515		0.683509	0.639204		1.07977	0.463651		1.73608	0.942426		0.0626035	0.296977
1.1941	0		0	0.549905		0.103179	0.616497		0.261515	0.729508		0.0741688	0.652649		1.34653	0
1.61915	0		0	0.713981		0.0466797	0.54686		0.0590412	0.435583		0.0214885	1.01283		1.36813	0.153076
1.89674	0		0	0		0.633428	0.113496		1.44533	1.03062		0.559856	0.528912		0	0.175884
1.49382	0		0	0		0.302372	0.838834		0	0.773669		0	0.748094		1.35139	0
0.019144	0		0	0		0	0		1.54374	1.45188		0	0.602659		0.760983	0
1.36203	0		0	0		0	0.626906		0.830081	1.21718		0.00416392	0.583642		0.61584	0
0.798449	0		0	0		0.0872788	0.523387		0	1.82489		0	0.593976		0.0225442	0.302091
1.8101	0		0.00928349	0		0	1.23475		2.17919	0.628357		0.118592	0.850024		0.426328	0
0.905228	0		0	0		0.777165	0.365491		0	0.78617		0.267128	0.904516		0.260209	0.2143
1.2861	0.352243		0	0		0.239961	0.737557		0.526833	0.694572		0.281074	1.06476		0.494824	0.376682
1.60295	0		0	0.314483		0	0.35416		0.891129	0.46454		0.643289	1.06581		0.0729511	0.314483
2.24669	0.237689		0	0		0	0.285355		1.38689	1.11971		0.426094	1.32594		1.44485	0
1.78912	0.0367282		0	0.0721551		0.00554115	0.536966		0.997469	0.276111		0.524142	0.787162		0.847398	0
1.27098	0		0	0.937595		0	0.381421		1.32633	0.826773		0.0407695	1.11642		1.37747	0
1.0039	0		0	0.979118		0	0.2277		0.608551	0.569355		1.07739	0.413048		0	0
0.921411	0		0.370354	0.594468		0	0		0	0.942924		1.07605	0.703001		0.597765	0
1.40959	0		0	1.46349		0	0.469101		1.58622	0.787144		0.537304	0.59385		0.152005	0
0.73209	0		0.25662	0		0	0.881901		0.833499	0		1.39288	0.461478		0.0395593	0
1.23544	0		0	0.717014		0	0.649659		1.35837	0.649659		1.00607	0.839474		0.848405	0
0.91041	0.315479		0	0.220963		0	0.130233		1.05163	0.546024		0.656659	0.790943		1.17361	0.170129
1.50448	0		0.00528375	0.668537		0.0157682	0.633092		1.08345	0.677206		0	0.389126		0	0.466631
1.06273	0		0	0		0.697591	0.609155		1.86187	1.59085		0.981249	1.56552		1.22944	0
1.39646	0		0	0		0	0		0.792493	0.0410902		0.0468166	0.842129		0.787659	0
2.77499	0		0	0		0	0		1.76193	0.964809		1.41138	0.179012		0	0
0	0		0	0		0.341811	0		0.360123	0.794035		1.04617	0.281205		0.490368	0
2.30402	0		0	0.41907		0.014481	0		1.82181	0.0408		0.556127	0.0605923		0.144609	0
0	0		0	0		0	1.71102		0	0.0381853		0.788275	0.314646		0.40444	0.271087
1.09797	0.550378		0	0.696393		0.11304	0.364883		1.33484	0.631639		0	1.29255		0.176072	0.335334
0.686495	0		0	0		0.00873278	0.65999		1.20915	0.928072		0.00873278	0.368899		0.923222	0
1.98724	1.41902		0	0.669996		0.922462	0.379265		2.10976	0		0	0.993884		1.30254	0
1.61619	0		0	0		0	0.832741		0.85276	0		0.0810358	0.677629		0.983899	0
1.20819	0		0	0.524926		0	0		1.73773	0.901925		1.03407	0.775406		0.162608	0
0.521075	0.596107		0	0.672911		0.00545578	0.282179		0	0.0355833		0.965003	1.04003		0.00545578	0.103163
0.661658	0.708021		0	0		0	0.464538		0.458698	1.05404		0	0.831604		0.510889	0.91901
1.86059	0		0	0		0	0.492369		1.01852	0		0	0.156705		0	0
0.451213	0		0	0		0.682218	0.187509		1.05711	0.796076		1.24693	0.901914		0.0207094	0
0.981372	0		0	0		0.562522	0		0	1.12245		0.228436	0.725795		0.401139	0.0774063
1.83172	0		0	0		0.192601	0.0226147		0.409782	1.55354		1.28183	0.0226147		1.45107	0
1.27784	0		0.140647	0.447159		0	0.788677		1.28861	1.17473		1.16063	0.772006		0.44528	0
2.43803	0		0.00436485	0		0	0.121888		1.00192	0.938261		2.06832	1.01159		0.51762	0.499646
1.56979	0.614138		0	0.0562126		0.47306	0.786181		1.38884	0.82915		1.14225	0.603654		0.20201	0.326049
0.504948	1.01611		0	0		0	0.0220639		0.565227	1.13045		0	0.717121		1.70924	0.201381
1.92887	0		0	0		0	0.293602		2.16579	0.189415		1.11438	0.768468		1.4014	0.0905642
1.9391	0.139147		0	0.101326		0.868956	0.921976		1.54083	0.120415		0.303692	0.557593		0.512655	0.355259
0.697414	0		0	0.64717		0.00526649	0.780776		0	0.447425		0.490814	1.04326		0.70527	0
1.14828	0.797607		0	0.331905		0	0.0386071		1.45921	0.0386071		0	0.413239		0.591829	0.21202
2.15536	0		0	0.890286		0.297619	0		0.812543	0.369859		1.80282	0.867052		0.297619	0
1.40028	0		0	0		0.220324	0.992843		0.567634	1.17103		0	1.17842		0.089532	0
1.93513	0		0.00498327	0.327779		0.284966	0.327779		1.7952	1.19685		1.31444	0.713062		1.23049	0.0515416
1.92681	0.427047		0	0		0	0.427047		1.95153	0.641918		1.13343	0.98955		0.0705289	0.785744
1.89728	0		0	0.932358		0.422567	1.3762		1.19973	0		0.523355	0.505454		0.830496	0.484351
1.43765	0		0	0		0.482329	0.0406319		1.13514	0.603973		0.783946	0.626388		0.510004	0
1.50304	0.50027		0.2192	0		0.146307	0.47752		0.474286	0.856106		0.470648	0.765445		0.625646	0.25987
1.97114	0.0688654		0	0		0.0149218	0.871374		0.998365	1.76912		1.3817	0.825602		0.540349	0.0350254
1.28969	0.400141		0.0767267	0.356174		0	0.534129		1.46082	0.469377		0.22365	0.50873		1.69119	0.120762
1.15468	0		0.452108	0		0.612384	0		1.28839	0		1.37599	0.365182		0.473278	0.446744
1.71925	0		0.643562	0		0	0.567944		1.80237	1.59191		0.702997	0.460409		0.0997488	0.221047
2.3513	0		0.62931	0		0	0.106777		1.94505	0.745775		1.10571	0.516478		0.481971	0
1.19334	0		0	0		0.151693	0		0.938495	0		0.921386	0.282872		1.13313	0.346506
0.0834233	0		0	0		0	0.487361		0	0		0	0.0936063		0.944478	0.425194
1.74632	0		0	0		0.00522826	0		0.870923	0.233724		0	0.410642		1.06388	0.106916
1.4927	0		0	1.1339		0	0.447861		1.30466	1.50373		1.01682	0.613802		1.01063	0
0.982356	0		0	1.19634		0.708775	0.411141		0.829865	0.509832		0	1.17844		0.775621	0
0.963976	0		0	0.751199		0	0.0240464		0.0100871	0.839083		0.00505626	0.967225		1.02035	0
0.963123	0		0	0.707867		0.52308	1.68563		0.789651	0.668062		0.50547	0.861318		1.01781	0.213185
1.292	0		0	1.17128		0	0		1.83057	1.22874		0.261291	1.19722		0.709646	0
2.11464	0		0	1.15843		0.496482	0.237412		1.8323	0.506577		0.525058	0.918175		1.26233	0
0.938662	0		0	1.13746		0.407344	0.222563		0.413146	0.445241		0.00436282	0.732458		1.23413	0
1.64792	0.381018		0.00503081	0.0364302		0	0.902405		1.09937	0.54435		0.534203	1.29549		0	0.454306
0.963366	0		0	1.32641		0	0		0.853232	0.822259		0.271274	0.525834		0	0
1.42773	0		0	1.21818		0.0104223	0.467036		1.09897	0.181004		1.00764	1.405		1.18425	0.181004
0.532829	0.0670909		0	0		0	0.323285		0.00425605	1.1367		0.0211014	1.16956		1.16473	0.372289
2.0179	0		0	0.659604		0.130198	0		1.46525	0.839522		1.46223	1.16068		0	0.266194
1.2138	0		0	0.45067		0	1.45055		0.172969	0.384505		0.00588356	1.0962		1.576	0.552058
0.449547	0		0	0.976479		0	0.827369		0.552957	0.0301895		0.187263	0.713976		0.739563	0.683498
1.13873	0.4452		0	0.336882		0	0.482975		0.537324	0.247174		0	0.61042		0.595916	0
2.30916	0		0	0.688218		0	0		1.88359	0.410226		1.591	1.0757		0	0.0922159
0.985809	0		0	0.64076		0	0.62085		0.00514008	0.868905		0.0102539	1.17127		0.832315	0.29022
2.21169	0		0	1.40885		0	0.35889		0.71845	0.693964		0.0471429	0.957843		0.0264644	0
1.70767	0		0	1.03219		0	0.0503459		1.22379	0.630096		0	0.602213		1.02514	0
0.579648	0.553939		0	0.75507		0.561149	0.248375		0	0.631837		0	0.1623		0.72708	0.480415
1.1626	0		0	0.363446		0	0.800734		0.650669	0.531359		0.843419	0.521001		0.829482	0
1.51785	0		0	1.28057		0	0.479946		0.810689	0.836802		0	0.932151		1.01765	0
1.77111	0		0.19603	0.661806		0.636466	0		1.49627	1.28631		1.44433	0.566654		0.641436	0
1.5785	0		0	1.31083		0	0		1.29926	1.28928		0.706489	0.347333		1.45667	0
1.98927	0		0	1.08431		0	0.428992		0.3378	1.22691		0	0.415485		0.229792	0
1.39748	0		0	0.90695		0.423249	0.576276		2.48109	0.986511		1.17066	0.632309		0.924153	0
1.35564	0		0.00534737	0.446824		0.101865	0.157609		0	1.25057		0.0368447	1.43324		0.85262	0
1.62707	0		0	1.03396		0.0103902	0.0667567		1.30547	0.545153		0.40635	0.909975		0.709999	0
1.63717	0		0	1.5286		0.551458	0.137223		1.51175	0.658312		0.646531	1.17525		0.6313	0
1.36727	0		0	1.51229		0	0		0.187578	0.510179		0	0.983381		0	0
0.901642	0		0	1.67944		0.162356	0.0892163		0.986808	1.2845		0.0721205	0.80489		0.606127	0
1.76426	0		0	1.46095		0.54991	0.134457		1.44003	1.10949		0.837231	0.687841		0.342605	0
1.06125	0		0	0.841641		0.404435	0.0195124		1.75296	1.17142		1.17651	0.318		0.209978	0
0.729101	0		0.162219	1.4951		0.353317	0.777637		1.14802	1.00426		0.677346	1.00426		0.00548858	0
1.45129	0		0.248112	1.55308		0.47528	0		1.53812	1.061		1.06846	1.23809		0.3629	0
1.29111	0		0	1.23597		0.530864	0.31621		0.212609	0.974324		0.695271	0.794248		0.993068	0
0.372033	0		0.227766	0.91427		0.329144	0		0.757432	1.28954		1.2777	0.640259		0.0648444	0
1.07433	0		0.230933	1.24589		0.334886	0.43113		1.20901	1.29782		1.54881	1.0244		0.718462	0
1.30966	0		0	1.07643		0	0		0.499897	0.813226		0.470688	1.15074		0	0
1.86042	0		0	1.33206		0.93327	0		0.75219	1.52587		0.4746	0.833		1.28283	0
2.005	0		0.478943	0.899039		0	0		1.64033	1.91807		1.41137	0.93284		0.518065	0
2.15443	0		0	1.38109		0.529782	0.387418		2.16443	1.69907		1.55337	0.70999		0	0
2.449	0		0	1.09554		0.631162	0		0.778345	1.63632		0.0874105	0.457326		1.16674	0
1.91852	0		0	1.15326		0.606986	0.506349		1.24452	1.46174		0.412426	0.877626		0.909759	0
1.98922	0		0.180544	1.04829		0.43802	0.827638		1.8559	1.17461		0.961619	0.667309		1.5497	0
0.896658	0		0	1.27024		0	0.292944		0	0.903796		0.283041	0.560982		0.791868	0
1.02931	0		0	0.744678		0.469823	0.3695		1.3138	0.600725		0.863792	0.973382		0.816157	0
2.80208	0		0	0.490748		0	0.513981		1.19766	0.843577		0.934089	0.93807		0.321176	0
1.48601	0		0.00509065	0.805803		0.458572	0.620015		1.05891	0.292361		0.480906	1.07761		1.19135	0
0.648969	0		0	1.03183		0.0850937	0.455513		0.737741	0.319393		0.566056	1.02285		1.1211	0
1.72426	0		0	0.984157		0.417166	1.06029		0.1189	0.887328		0.822066	0.721854		0	0
0.591674	0		0	0.572649		0.735591	0.552633		0.916047	0.884984		1.27579	1.23089		0.735591	0
1.00904	0		0	0		0.0213944	1.22401		0.884973	1.21187		0.206383	1.29953		0.872399	0
1.76496	0		0	1.03879		0.514344	0.333091		1.49686	0.346491		1.06085	1.16385		0.780659	0.30574
0.592095	0		0	1.06622		0.472849	0.378214		1.02177	0.300274		0	0.478034		0	0.123399
0.732709	0		0	0.956108		1.01019	0.643055		1.35063	0.755114		1.70942	0.816778		0.529716	0
1.14072	0		0.0566914	0		0.236922	0.692781		1.84258	1.28429		0.810581	1.22429		0.038149	0.647947
1.80927	0		0	0.67872		0	0.355851		1.89108	0.67872		1.71945	0.552866		0.210616	0.914643
1.57091	0.581623		0	0.80637		0	0.172139		1.57568	0.434858		0.456944	1.0173		0.145228	0.345895
1.03158	0		0	1.40863		0	0.388957		1.32724	1.45329		0.721383	1.21705		0.16919	0
2.05835	0		0.278617	0.641007		0	0.0877111		0.389015	0.83367		0.618857	0.793028		0.995117	0
0.997885	0		0	0.787522		0.702097	0		0	1.38501		0.763245	0.829221		0.179127	0
1.71186	0		0	1.11247		0.437913	0.108403		1.34591	0.896207		1.67569	0.78076		0.827488	0
2.05224	0.329527		0	0.207533		0	0.954251		0.728777	0.415085		0	0.987841		0.993553	0
0.437612	0		0	1.41762		0.936144	0.597385		0.937951	1.21817		0.784028	0.342653		0.211304	0
1.86283	0		0	1.5389		0.244285	0		1.78191	0.975172		0.502133	1.03445		0.431938	0
1.19422	0		0	1.37812		0.492527	0.418527		0.452858	0.892738		0.670221	0.562146		0.865293	0
1.79496	0		0.16358	1.14549		0	0.121667		1.33228	1.15718		0.327686	1.55075		0.00537101	0
0.791323	0		0	1.61166		0.593256	0.282365		1.93499	1.32027		0.617982	0.960162		0.982347	0
1.09991	0		0.247141	1.3243		0.493997	0.635353		1.56498	1.10093		1.62918	0.604204		0.524379	0
1.7552	0		0	1.36586		0	0.338351		2.09711	0.696433		0.580828	0.407657		0.55488	0
1.40693	0		0.00447169	1.09196		0.322768	0.476662		1.28697	1.17532		1.18547	0.822812		1.07249	0
1.49032	0		0	1.2795		0	0.146058		0.83536	1.13038		0.125876	0.350213		1.10709	0
1.73738	0		0.312128	1.26752		0.335905	0		1.69432	0.537358		0.941548	1.4645		0.861493	0
1.38466	0		0	0.834255		0.56462	0.443705		1.33478	1.05785		1.39733	0.948693		0.868521	0
1.68718	0		0	0.973739		0.357622	0.292903		1.42898	1.14719		1.10348	0.306177		0.934025	0
0.758731	0		0.073995	0.747311		0.00547083	0.416957		1.42942	0.850682		1.28405	0		1.23262	0
2.19801	0		0	1.33841		0	0.75579		0.648542	1.61021		0.20642	1.00237		0.604622	0
1.47057	0		0.113612	1.01653		0.421497	0.0597022		1.43437	1.10183		1.17917	1.41014		0.339271	0
0.590038	0		0	1.09746		0.579856	0.716247		0.0790265	1.15405		1.06488	0.744263		0.663261	0
1.56092	0		0	1.70123		0.609022	0		0.412667	0.790678		0.896758	1.69779		0.033489	0
0.793768	0		0	1.81058		0.0634424	0.932305		0.861738	0.803026		0.659253	0.621973		0.74833	0
2.03859	0		0.194963	1.4658		0.548468	0.341548		1.42955	0.885805		0.665707	1.20349		0.167758	0
0.978063	0		0	0.878087		0.660733	0.380521		1.1535	1.39088		0.344313	1.03599		0.47082	0
0.71029	0		0.0172385	1.21617		1.08975	0		1.46351	1.3847		1.03259	0.969604		0	0
0.316208	0		0.185235	1.20942		1.19867	0		0.778822	0.961483		1.70567	0.332835		0.633492	0
0.801066	0		0.340693	1.17757		0.778028	0.0497954		1.33523	1.09567		1.41475	0.45656		0.643524	0
2.3771	0		0	1.76438		0.885276	0.487817		1.18033	1.29603		1.4575	0.599318		0.504309	0
2.37287	0		0	0.226371		0.426134	0.441935		1.26432	0.644494		1.00755	0.652794		1.28858	0
1.98806	0		0	0.0147341		0.0592998	0.726926		0.57479	0.326367		0.884842	0.437738		1.19516	0
1.54897	0		0	0.891392		1.11027	0.476115		1.09009	1.3429		0.0506569	0.85216		0.824932	0
1.93965	0		0	0.182732		0	0.358953		0.613363	0.732163		0.430392	1.10025		0.468516	0.663086
1.8621	0.315511		0	0.824093		0.323845	0.315511		1.45293	0.355297		0.553843	1.1479		0.881012	0
2.20956	0		0	0.940532		0.82339	0.346317		1.38108	1.3407		0.574791	0.94785		1.00808	0
2.91681	0.213985		0	0.248411		0	0.281691		0.911659	0		1.68289	0.957492		0	0
1.78926	0.421208		0	0		0.595469	0.560062		1.30449	0.386228		0.969997	0.72516		0.519761	0.923871
2.11511	0		0	0.746834		0	1.1068		1.11912	0.452019		0.854602	1.24757		0.752511	0.0478222
2.48039	0		0	0.682556		0	0.403789		0	1.10594		0.491219	0.698645		1.85371	0
1.24121	0.409659		0	0.684523		0	0.899896		0.75787	0.947199		0	0.887712		0.861431	0.0578586
1.27306	0		0	0		0	0		1.06199	0.510318		0.337611	0.585164		0.68351	0
1.89572	0		0	1.44949		0	0.58193		1.22907	0.913553		0.270211	1.15678		0.624252	0
1.93414	0		0	1.40054		0	0.247749		1.0167	1.20506		0.752284	0.457329		1.23275	0
0.977454	0		0	0.692668		0	0.87637		1.15683	1.42428		0.854845	0.854237		0.316982	0
1.41642	0.518057		0	0.21619		0	1.49044		1.34683	0.373292		0.940462	0.925625		0.892439	0.570564
0.906958	0		0.233249	1.20471		0.49408	0.117405		1.4818	0.895348		1.30586	1.23233		0.0348838	0
2.70804	0		0	0.816597		0	0.182486		1.09017	0.913801		0.955385	0.169572		0.748702	0
1.17699	0		0	1.33893		0.966791	0.0707439		0.656512	0.720573		1.00306	0.442843		0.381191	0
1.43912	0		0	0.393384		0.469531	0.0183682		0	0.575824		1.1721	0.586193		1.02127	0
1.10903	0		0	1.35683		0	0.659498		1.61799	0.687507		1.10903	0.666574		0.238122	0
1.02669	0		0	0.427347		0.670378	0.569728		0.426337	0.101326		0.380298	0.887452		0.7432	0
1.84596	0		0.420402	1.43518		0	0.60178		1.10241	1.59768		0.950669	1.26985		0.196321	0
1.66148	0		0	0.835305		0	0		0.294968	0.536701		0.675452	0.792777		0.16743	0
2.68138	0		1.23034	0.662656		0.172305	0.259917		1.12477	1.30057		1.62997	0.0638763		0.482072	0
2.60372	0		0.625833	0.990059		0	0.599422		1.98966	0.53422		1.84325	0.514782		0.0276717	0
0.717793	0		0.569219	1.11312		1.02909	0.637054		1.49517	1.15801		1.57198	1.14141		0.794907	0
0.774319	0		0	1.36452		0.252811	0		0.466144	1.36452		0.500477	1.11875		1.01294	0
0.962694	0		0	1.21691		0.654924	0		0.272953	1.1342		1.52625	0.719954		0	0
1.40514	0		0	0.988436		0.00855576	0.988436		0.717001	0.611674		0.00855576	0.446186		0.828058	0
1.69198	0		0.232699	1.02314		0.623474	0		1.58726	1.03539		1.21135	0.732097		0.147375	0
1.94458	0		0.133709	0.769426		0.00890155	0.661582		1.00925	1.26348		1.32042	0.769426		0.629273	0
1.09275	0		0	1.06096		0.994858	0		0.222815	1.29238		1.3904	1.52846		0.419087	0
1.04448	0		0	1.1372		0.325694	0		0.204137	0.68186		1.66824	0.0631345		0.134031	0
1.57201	0		0	1.23328		0.923337	0		1.23934	1.49458		1.29534	0.388153		1.3349	0
0.00825944	0		0	1.39119		0	0.0969314		0.420353	1.0647		0.896654	0		0.571719	0
1.70167	0		0	1.2836		0	0		1.1906	1.11408		0.0907373	0.330953		0.861932	0
0.481888	0		0	0.918248		0.847372	0		0.0188709	1.27337		0.891293	0.556387		0.363359	0
1.88496	0		0.0253015	0		0	0.294926		1.82069	1.22412		0.961008	1.02994		0.94121	0.294926
0.970095	0.324268		0	0.501461		0	0.429329		1.54098	0		1.26106	0.858541		0.310454	0
2.38042	0		0	0.583045		0.307713	0.366885		0.00896742	0.238312		0.532159	0.160525		0.899859	0
1.96419	0		0.00924367	1.24358		0.105655	0.873674		1.76761	1.28209		0.430885	1.1618		0.675899	0
1.22644	0		0	0.973585		0.442082	0.275213		0.25967	1.11299		1.15199	0.67614		0.788837	0
1.85065	0		0.0277921	0.423188		0	0.377645		0.947086	0.961056		0.0897856	0.980368		0.16423	0.651121
1.6782	0		0	0.727475		0.816996	0.412753		1.3513	0.630332		1.3685	1.28612		0.535576	0
1.57971	0		0	1.00353		1.12007	0.218745		0.783561	0.28218		1.13795	0.136895		0.404015	0
1.45888	0		0	0.534796		0	0.545361		0.735652	0.491384		0.537089	0.881369		0.105919	0.211638
2.0821	0		0	1.18123		0.231374	0		0.434138	1.03201		0.429165	0.3856		1.40373	0
1.94727	0		0	1.62185		0	0.249854		0.432339	1.25819		0.51346	0.912342		0.816249	0
0.437155	0.150588		0	0.210867		0.335586	0.742655		1.35095	1.12968		0.809207	1.52069		0	0.825089
2.6985	0		0	0		0.427463	0.548155		0.701318	0.996449		0.955546	1.01913		1.13892	0.0455463
2.40995	0		0.886495	1.42552		0	0		1.52616	1.11918		1.21046	0.881161		0.545011	0
1.98322	0		0	0		0	2.09424		0.987703	0.141888		0.297124	0.540288		0.860654	0.417605
1.6392	0.797311		0	0.510843		0.132708	0.655896		1.03298	0.256729		0.0140918	0.995985		1.42153	0.576906
0.411612	0		0	1.23664		0.713109	0.291477		0.458689	1.39764		0.843311	0.505616		0	0
1.4029	0		0	0.564483		0.809132	0.214739		0	0.923099		0.517765	0.840473		0.156635	0.0197649
2.00825	0		0	0.902863		0	0.650584		0.0341361	0.770618		0	1.03423		0.818668	0
2.35875	0		0	1.34304		0	0.04792		0.581973	1.16082		0.39823	0.463131		0	0
1.52445	0		0	0.943322		0.661786	0.384724		0.849815	0.90067		0.0159112	0.922223		0.935197	0
0.663494	0		0	1.59891		0	0.856359		0	0.43297		0.196622	0.715376		0.723811	0
0.829614	0		0	0.760421		0	0		1.52178	1.19886		0.555192	0.820696		0.380373	0
1.84985	0		0	1.18932		0	0		1.66243	0.410614		0.923355	0.74817		0.166469	0
1.13055	0		0	1.39486		0	0		1.7071	0.594866		0.995773	0		0.488094	0
1.16067	0		0	1.3327		0.144958	0.377812		0.23975	1.22002		1.39364	0.660903		0.698053	0
0.864642	0		0	1.08203		0.00882646	0		1.40302	0.893094		1.15717	0.867822		0.581674	0
0	0		0	1.67896		1.62556	0.0504074		0	0.902118		2.18467	0.956543		1.26538	0
1.3259	0		0	0.764487		0.474502	0.209374		0.49826	0.941488		0.887773	0.928426		0	0
0.454821	0		0	0.334062		0.0170447	0.923282		0.687365	0.649181		0.921393	0.718781		0.0903426	0
1.15559	0		0	1.35787		0.65126	0.530683		1.34783	1.19968		0.752333	1.03527		0.600352	0
1.52868	0		0.0192336	1.41758		0.617598	0		1.45742	1.36498		1.32722	0.771603		0.30456	0
1.5452	0		0	1.27445		0.00672126	0.445709		1.31494	0.956359		1.23192	0.391373		1.08146	0
1.55495	0		0.187088	0.810208		0.366807	0		1.68924	1.12513		0.869093	1.19749		0.495269	0
1.72645	0		0	1.56622		0.405891	0.54432		1.31721	1.18923		0.706014	0.0733909		0.757339	0
1.92155	0		0.570413	1.75361		0	1.04161		2.02822	1.19156		1.46054	0.763654		0.485391	0
1.51441	0		0	1.47304		0.0216573	0.582868		1.92573	0.982917		1.28645	1.12681		0.422286	0
1.24796	0		0	1.05464		0.266286	0.786883		1.36494	0.75672		0.809087	0.660353		0.571682	0
1.27011	0		0.489736	1.05861		1.51446	0.514923		1.7451	1.55031		0.759587	0.358888		0	0
2.09403	0		0.364537	1.31116		0.523403	0.231913		1.12729	0.934517		1.03225	0.877732		1.44994	0
0.926595	0		0	1.2905		0.480376	0.909047		1.3512	1.69788		1.76449	1.60969		0.250465	0
1.62283	0		0	1.87089		0.116857	0		0.696722	0.018897		0.869948	0.588464		0.806291	0
1.7979	0		0	1.01104		0.358123	0.769786		1.02115	1.38699		0	1.01793		0.763519	0
1.1615	0		0	0.356891		0.791301	0		1.56576	1.24583		0.835855	0.852338		0.712326	0
1.17071	0		0	0.888282		0.0601836	0		0.546186	1.08348		0.0175681	0.666417		0.460502	0
1.95308	0		0	0.953231		0	0.766558		1.22124	1.6896		0	0.900014		0.806761	0
1.94977	0		0	0.593252		0.00798278	0.465357		1.11309	1.19727		0.756158	0.571182		0.365205	0
2.09818	0		0	0.305186		0.350213	0.853652		1.81767	0.957798		0.490255	0.678795		0.840259	0
2.43166	0		0	1.3183		0.436821	0.212116		1.73207	1.00533		1.58041	0.665348		0.106661	0
1.0407	0		0	0.382717		0.224574	0.668064		0.277979	0.836867		0.236691	1.26596		0.867531	0
2.23925	0		0	1.12024		0.00681157	0		0.817329	0.663084		0.65728	0.313442		1.14182	0
2.04349	0		0	0.609719		0.791044	0.631224		0.697562	0.494656		0.986345	0.797451		0	0
2.11538	0		0	1.01086		0	0.628063		0.859079	1.30451		0.65929	0		0.56119	0
2.36971	0		0	0.620277		0	0.445011		0.835823	0.706851		0.0914664	0.836316		0.947932	0.18691
1.37808	0		0	1.03936		0.694115	0.697575		1.1906	0.962414		0.00767766	0.618743		0	0
1.19083	0		0	1.53022		0	0		0	0.761193		0	0.558152		0.565623	0
0.957046	0		0	0.900846		0	0		0	1.35723		0.150031	0.250559		1.20149	0
1.22805	0		0	0.914449		0.407487	0		2.09241	0.455633		1.52912	0.767486		0	0
1.86371	0		0.112635	0.617336		0.4084	0.473064		1.78687	1.65524		1.2694	0.700175		0.351972	0
1.64475	0.743065		0	0.202919		0	0.202919		1.82939	0.273808		1.04123	1.17163		1.19281	0.273808
1.50076	0		0	0.653973		0.5451	1.03768		0.863926	1.21405		1.08986	1.16359		0.314884	0
1.9518	0		0	0.872894		0.249841	1.29115		0.91095	0.517649		0.173293	0.73834		0.578795	0.857032
1.90825	0.926778		0	0.976918		0	0		1.06772	0.480596		0.760432	0.150468		0.831879	0.230957
1.00472	0		0	0.328353		0.389238	0.495501		0.616946	1.04599		0.949126	1.32432		0.289965	0
0.644746	0		0	0.92446		0.564436	0.573574		1.7013	0		1.0607	0.841431		0	0
2.60267	0		0	0.21895		0.133684	0.539693		1.00841	0.782161		1.2928	1.14027		1.56204	0.0186534
2.3453	0		0	0.88459		0.775133	0		1.00548	1.79151		2.16722	1.13509		0	0
1.91999	0		0.394152	1.04464		0.045694	0.0702021		1.33843	1.4802		1.3902	0.310147		0.643911	0
1.94162	0		0	1.04034		0.460417	0.229825		0.875666	1.47223		0.576414	1.08498		0.460417	0
0.838168	0		0	1.42746		0.201901	0.548755		1.84197	0.548755		1.34598	1.13528		0.245411	0
1.49533	0		0.0451109	1.21267		0.285703	0.951699		1.36475	0		1.46024	0.681469		0.374145	0
1.43251	0		0	0.867342		1.05196	0		1.14164	1.1025		1.61539	0.999108		0.0831116	0
1.59967	0		0.106581	1.38445		0.19675	0		1.51765	1.57562		1.37477	0.384878		1.01867	0
1.77293	0		0	1.17268		0	0.617737		1.58516	1.25917		1.04382	0.829648		0	0
0.412893	0		0.452683	0.445923		0.608864	0.583227		1.30808	1.01611		0.905112	1.12962		0.673467	0
1.12679	0		0	1.27746		0	0		1.81884	1.36318		0.487988	0.775183		1.09685	0
0	0		0.369243	1.74243		1.01065	0.683452		0.395965	1.05935		1.06612	0.311418		0	0
1.63742	0		0	1.55995		1.05188	0.560596		1.62332	1.34977		1.19235	0.754982		0.227827	0
1.11992	0		0	1.49465		0.574166	0.666462		0.375874	0.0234073		1.40184	0.536787		0.223899	0
1.84698	0		0	1.58477		0.0145259	0.321637		0.557457	0.450487		0.505875	0.923281		0.358821	0
0.649465	0		0	1.74234		0.909689	0.861327		0	0.959737		0.48858	1.34936		0.190621	0
1.01365	0		0	1.21361		1.05561	0.113583		0.978762	0.653462		1.59344	0.780609		0.0536446	0
1.37473	0		0.0973218	1.75046		0	0.335113		1.28839	1.07527		1.09634	1.22041		0.896681	0
1.16118	0		0.333416	1.37883		0.18054	0.711593		0.952242	0.320035		0.897666	0.267318		0.854686	0
1.51447	0		0	0.835648		0.0794603	0.700049		1.16484	1.34718		1.38751	0.127936		0.176448	0
1.05084	0		0.143518	1.30767		0	0.123621		0.917357	1.5301		0.198284	1.55819		0.0930078	0
1.72716	0		0	1.40126		0.0439207	0		1.31878	1.32584		0.731208	1.10177		0.165174	0
1.30349	0		0	0.817019		0	0.572861		1.80041	1.04678		0.126588	0.956762		0.638711	0
1.69817	1.00549		0	0.861287		0.0697969	0		0.894375	0.526678		0.685597	1.00549		0.10295	0.0593752
1.83176	0.280266		0	0		0.224935	0.636351		1.50332	0.233354		0.621168	0.570001		0.311385	0
0.818959	0.626572		0	0.247663		0.164531	1.19526		0.89817	0.670643		0.959181	0.3114		1.5386	0
1.51001	0		0	1.29967		0	0.020472		1.35468	0.0794873		0.029615	0.614105		0.329844	0
0.985202	0		0	0.699359		0.545983	0		1.16576	0.525822		0.392671	0.620895		0.708315	0
0.098936	0.383583		0	0.256352		0.519209	0.314906		0	0.484509		0.424897	0.984071		1.17577	0.554035
2.12739	0		0	1.16115		0.546232	0.227191		1.58798	0.67766		0.991662	1.00594		0.943946	0
1.17918	0.507796		0	0.479623		1.18978	0.517013		1.07129	0.653989		0.719355	1.14871		0.44988	0.0741173
2.20844	0		0	0.721676		0.01839	0.913038		1.75427	1.12773		1.16005	1.25921		0.506146	0
1.581	0		0	0.831825		0.00807611	0.493092		1.08598	1.05312		1.23569	1.32896		0.561967	0
2.38831	0		0.0218467	1.18539		0	1.24267		1.59714	0.924966		0.937449	0.958398		0.162711	0
0.563236	0		0	1.43455		0.898437	0		0.672773	0.313266		1.58667	0.716404		1.00514	0
2.16116	0		0.261056	1.13234		0.26821	1.21508		1.1776	0.546073		0.363342	1.30713		0.793826	0
0.943697	0		0	1.13215		0.529744	0		0.405571	0.41502		1.50049	1.08794		0.539847	0
1.54606	0		0	0.832977		0	0.050699		0.584234	1.51214		0.360359	0.94008		0.878525	0
0.0157812	0.190499		0	1.16675		0.194527	0.573711		0.0313173	0.242494		0.834788	1.57397		0.923887	0.121457
1.44716	0		0	1.28683		0.706379	0		0.460814	1.2409		0	1.1159		0.165609	0
1.39919	0		0	0.441686		0.571158	0		0.61969	1.62522		0.461787	0.948002		0.234367	0
1.32829	0.815511		0	0.82461		0	0.556068		0.950833	0.482324		0	0.316197		1.31939	0
2.44235	0		0	1.19732		0	0.187885		0.836469	0.527827		1.22667	0.910048		0	0
1.386	0		0	1.13772		0	0		1.42142	1.16191		0.215345	0.534472		0	0
1.94006	0		0	0.972472		0.0112656	0.659538		1.10788	0.184836		0.668679	0.850126		1.10413	0
2.43561	0		0.0113885	0.706847		0.632298	0.604761		0.549873	1.17251		1.33962	0.749075		0.999913	0
1.25249	0		0	0.224964		0.47699	0.0208052		0	1.32283		0	0.350983		0.397048	0
1.11207	0		0	0.754905		0	0.447058		1.60965	1.60697		0.878776	0.473411		1.3345	0
0.95395	0		0.292643	0.726711		0.866573	0		1.71411	0.911456		1.78312	0.839952		0.347491	0
1.64436	0		0	1.41656		0.00812645	0.248653		1.68905	1.15378		1.32387	1.14259		0.205767	0
2.69397	0		0.433488	0.210356		0	0		1.71828	0		1.56242	0		0.688988	0
0.988182	0		0.36689	1.46389		0.327285	0.882817		1.94904	1.51386		1.30286	0.426338		0.110806	0
0.78613	0		0	1.23195		0	0		1.25666	0.672123		0.366412	0.467709		0.600562	0
1.10733	0		0.312838	1.58934		0.386193	0		1.73857	1.28103		0.788388	1.05509		0	0
2.16384	0		0	1.18172		0	0.414509		1.65446	1.41155		0.533026	0.386987		0.632859	0
0.869881	0.221002		0	0		0	0.752586		1.69007	0.658675		0.90555	0.618494		0.122214	0.376107
1.95775	0		0	0.978366		0	0.114641		1.77708	0.776671		1.29352	0.535664		0.160741	0.436072
0.559376	0		0	0.805152		0.135638	0.463716		2.00429	1.18899		1.09241	1.39749		0	0
1.92222	0		0	1.03785		0	0.368563		2.18865	0		1.20464	0.626503		0.0537435	0.637271
0.00563457	0.0193211		0	0.485068		0.613872	0.747639		0.479893	0.343368		0.517637	1.14613		0.579652	0.901449
1.19191	0		0.479088	1.19447		0.450487	1.31937		1.75935	0.934622		0.746544	0.817625		0.754604	0
2.12278	0		0	0.361864		0.505516	0.961969		1.72864	0.458271		1.13594	0.955003		0.442526	0.386851
1.71622	0		0	0.734556		0.184903	1.45209		1.60661	0		0.00632686	1.06242		0.608566	0.622708
0.381846	0		0	0.676505		0.410812	0.472731		0.0255046	0.232613		0.979039	0.5798		0	0
1.15889	0.576534		0.399573	0.966425		0.337426	0.108572		0.980296	0.43857		0.579252	1.09712		0.893478	0.0877802
1.52697	0		0	0.887164		0.323919	1.04359		1.56267	0.841582		1.42309	0.264638		0.498061	0
1.72326	0.230716		0.0946098	0.852153		0	0.562419		1.16501	0		0.361224	0.920213		1.44732	0
1.21089	0		0	1.38103		0.0300164	0.573999		1.67563	0.596724		1.38029	0.693045		0.608658	0.151202
1.51121	0		0	0.397085		1.05865	1.10788		0	0.356964		1.07467	1.05499		0.0355615	0
1.53936	0		0	0.615216		0	0		1.73826	0		0.812878	1.09087		0.667664	0
0.792497	0		0	0.915034		0.272233	0		1.43848	1.29887		1.78209	0.823214		0.0141222	0
1.30225	0		0	1.26957		0.150527	0.586959		1.23451	0.413345		1.55997	0.540353		0.683239	0
1.70331	0		0	1.07929		0.752174	0.615119		1.29291	0.794851		0.636854	0.280478		0.700381	0
0.733168	0		0	0.41695		0.284023	0.284583		0	0.870195		1.48113	0.721817		0.317558	0
1.54089	0.298031		0	1.08542		0	0.267242		0.74126	0.251484		0.111114	1.35577		0.873358	0
1.86208	0		0	0.837587		0	0		0.750042	0.689972		0	0.0209213		1.25784	0
1.79816	0		0	1.28486		0	0.0835495		1.16255	1.28967		0.36577	1.1564		0.369246	0
1.40532	0		0	1.07161		0.29126	1.20733		0.899638	1.05063		0.887781	1.20126		0.661168	0
1.22306	0		0	1.42697		0	0		0.495813	1.06051		0	0.97526		0.228516	0
1.90295	0		0	1.36702		0.45221	0.997109		1.15614	1.30965		0.00404699	1.03314		1.15102	0
1.10229	0		0	0.989828		0.89517	0.44159		0	0.746857		1.1932	1.2304		0.0576023	0
1.94718	0		0	1.19767		0	0		0.0252061	0.937872		0.219179	1.46391		1.27342	0
2.30201	0		0	1.34455		0	0.548103		1.08096	1.76806		1.18484	1.22944		1.16707	0
1.30141	0		0	1.63851		0	0.92637		1.4471	1.50705		0.546596	1.42806		0.447953	0
2.42263	0		0	0.860975		0.0505237	0		0.206605	0.174061		1.62805	0.114213		0.764296	0
1.09136	0		0	1.11983		0.486468	0		1.13891	0.558943		0.659611	0.604194		0.995338	0
1.71267	0		0	1.57089		0.865532	0		1.63352	0.683073		0.60804	0.827878		1.3425	0.151283
1.29508	0		0	1.00305		0.704138	0.6992		0.351523	0.819841		0	0.46711		0.777933	0
1.96107	0		0	0.963008		0.00592304	0.970519		0.335058	0.985375		0	0.859849		1.23593	0
1.39162	0		0	1.49849		0	0.706197		1.33803	1.09812		0.423657	0.791325		0.720313	0
1.59999	0		0	1.32098		0	0		1.58701	0.638061		0.449159	0.619753		0.134308	0
0.59977	0		0	0.957457		0.20373	0.195906		0.00682415	0.633231		0.995111	0.38451		0.658172	0
1.05744	0		0.371957	1.27292		0.381822	0.520086		0.674706	0.509633		1.4344	0.609546		0.338355	0.219041
1.38568	0		0	1.17656		0.666217	0.507388		1.11702	1.06565		1.4993	0.693864		1.12198	0
2.45733	0		0.232068	0.538356		0	0.945153		1.86638	0.118544		1.54054	0		0.443572	0
1.73803	0		0.258624	0.81875		0.568913	0.612538		1.22909	0		1.09299	0.516462		0.121731	0
1.11513	0		0.314446	1.42552		0.245602	0.470007		0.93366	0.683102		1.47963	0.947796		0.49642	0
1.29755	0		0	1.25371		0	0.693807		1.48029	0.253745		0.95893	1.05356		1.15259	0
0.991848	0		0	0.0184057		0.0597571	0.647225		1.54285	1.17795		1.20261	0.54492		0.164784	0
1.5946	0		0	0.166945		0.426373	0.29655		0.588041	0.737229		1.10772	0.636724		0.686841	0
1.99193	0		0	1.29943		0.395243	0.781807		0.72402	0.296949		0	0.166451		1.12606	0
2.096	0		0	1.06902		0.391549	1.4189		0.418467	0		0.684997	1.11871		0.516424	0.180526
0.805135	0		0.0364892	1.1052		0.0210137	2.01516		0.867245	0		1.17406	0.785116		0.292503	0
0.866841	0		0.712913	0.269514		0.434512	0		1.86536	0.91727		0.746675	0.0846898		0.0265845	0
2.45836	0		0.273777	0.538563		0.481799	0.938113		1.88016	0.659122		0.257122	0.630317		0.132056	0
1.82915	0		0.0171839	1.32325		0.441242	0.471391		1.63977	1.22102		1.59624	0.182938		0.474141	0
2.21554	0		0.365068	1.05702		0	0.467793		0	0		0.422068	0.560248		0.176592	0
2.02546	0		0	1.39249		0	0.658656		0.824581	0.983629		0	0.761488		0.893384	0
0.633975	0		0	0.793608		0	0		0.701036	0.817146		0.907654	0.862622		0.947432	0
2.01558	0		0	1.20943		0	0.291762		0	0.786505		0.451394	1.15443		1.37896	0
2.31959	0		0	0.697367		0	0.331551		1.57087	1.08709		1.92985	0.917945		0.15414	0
0.965609	0		0	0.901384		0.585895	0.185766		0.408469	1.8525		0.884015	0.240738		0.801144	0
1.94424	0		0	1.51261		0.593163	0.134267		1.09407	0.995627		0.910445	0.431048		1.15278	0
1.66954	0		0	0.516737		0.900854	0.0390255		0.659522	0.739275		0.500561	0.880785		0.629069	0
1.70589	0		0	0.869024		0.572686	0.653915		0.599365	0.899521		1.12861	0.891984		0.289362	0
2.63475	0		0.231536	0.792631		0.407103	0.466		0.990832	1.64002		0.790011	0.466		1.63899	0
1.48866	0		0	1.00547		0.281368	0.41105		1.24339	1.36988		0.00549236	0.0228462		0.865783	0
1.88852	0		0	1.20239		0.472801	0		0.9792	0.671583		1.91202	0.825796		0.00602662	0
1.63579	0		0	1.35686		0.311443	0		0.978854	0.790705		0.609366	0.825912		1.22316	0
2.5823	0.226867		0	0.648434		0	0.637276		1.47829	0.543223		0.728492	1.0234		0.636718	0
1.45045	0		0	0.135815		0.340049	0.665549		1.09659	0.836916		0.449177	0.702252		0.232462	0
0.387683	0		0	1.51531		0.433484	1.27272		0.259264	0		0.332633	0.346354		0	0
0.441512	0		0	0.955456		0.23564	0.380568		0.00588749	0.655566		1.52391	0.20828		0.345956	0
0.849814	0		0	0.658271		0.292245	0.868725		1.65981	0		1.07768	0		0.539933	0
1.63011	0		0.231743	1.00995		0.535249	0.207153		1.90769	1.45394		1.37201	0.875554		0.154997	0
1.74382	0		0	1.04886		0	0		1.17917	0.330368		0.512477	0.506417		1.16719	0
1.58845	0.496211		0.0113775	1.08969		0	0.663092		1.34934	0.393301		1.26095	0.884861		1.0304	0.651198
2.06298	0		0	1.43914		0.0621722	0		1.82293	0		0.378903	0.411466		1.22452	0
2.31925	0.0218192		0	0.84309		0	1.34118		1.00362	0.26913		1.80156	0.644176		0	0.124298
2.44063	0		0	0.498658		0	0.414362		0.29007	0.388912		0	0.725052		1.616	0
1.02887	0		0.0169779	1.03843		1.15518	0		1.30051	0.633491		1.28957	0.346331		0.118287	0
1.70306	0		0	1.24097		0	0.889703		1.82117	0.357899		0.0130265	0.819988		1.65913	0
1.96499	0		0	1.46164		0	0.329135		0.731665	0.460362		0.406727	0.3969		1.15639	0
0.714511	0		0	1.34751		0.492761	0.571923		0.584738	1.00323		1.0869	0.153028		0.207398	0
1.77337	0		0	0.79781		0.402075	0.0208277		0.910181	0		0.1202	0.995003		1.36787	0.274362
1.06229	0		0	0.850093		0.642879	0		1.43143	0.359222		1.21709	0.81245		0.0853345	0
2.42576	0		0	0.967833		0.330774	1.45032		1.00657	1.40585		1.23439	0.848211		1.59794	0
2.00738	0		0	1.2436		0	0.603533		1.92487	0.622631		0.0116059	1.29318		0.784221	0
2.49211	0		0	1.12479		0	0.960545		1.08727	1.03228		1.0005	1.02534		1.23422	0
1.83969	0		0	0.773763		0	0.58645		0.988925	1.03783		0.483839	0.315039		1.3297	0
0.442908	0		0	1.52575		0	0.108173		1.0672	0.88707		0.707192	1.11721		0.108758	0
1.42994	0		0.506433	1.08615		0	0.134816		1.05662	1.15212		0.708681	0.698275		0.666175	0
1.38716	0		0	1.05816		0.493139	1.16546		1.28612	1.18325		0.906601	0.843475		0.534363	0
0.547789	0		0	1.33812		0.993263	1.01793		0.49183	0.772383		1.40956	0.781617		0.0571594	0
1.9527	0		0	0.785265		0.0922748	0.554516		0.531116	0.768642		0.0120108	1.21964		1.1534	0
2.21553	0		0	0.891681		0.00563547	0		0.970362	0.934151		0.948714	0.337997		1.03062	0
1.87362	0		0	1.04666		0	0.30923		1.37121	1.00774		0.248212	1.08412		0.744438	0
1.64511	0		0.0378402	1.35592		0.761007	0.389255		1.76614	0.0488784		1.3938	0.337002		0.574823	0
0.833148	0		0	1.28278		0.115641	0.639768		0.293511	0.476816		1.4781	0.501785		0.0366316	0
2.1343	0		0	0.882327		0.828142	0.472738		1.04521	1.09297		0.0284929	0.897837		1.38198	0
1.33144	0		0	1.24689		0.268661	0.647766		0	1.01485		0.151468	0.883718		0.049095	0
1.80769	0		0	0.137165		0	0		0.0168824	1.19492		0.0056592	0.551059		1.28702	0
2.22917	0		0	1.04615		0	0.73978		1.33569	0.0897474		0.864615	0.783615		0.502612	0
2.6332	0		0	1.15003		0	1.26714		0.901799	0.103462		1.34255	0.977145		1.18873	0
1.3826	0		0.249266	1.11858		0.700099	0		0.732782	0.782234		1.36435	0.154012		0.0254093	0
2.21313	0		0	0.836713		0	0.940528		0.655179	0.243361		0.409654	0.537536		1.09247	0.0666136
1.90692	0		0	0.77494		0	1.35402		0.808322	0.293041		0.826483	0.604296		1.02202	0.0618882
1.96513	0		0	0.680234		0	1.62842		1.08663	0		0.004948	0.134834		1.28483	0.134834
0.513997	0		0	1.22273		0.384452	0		1.36534	0.996561		1.32601	0.601585		0	0
1.04673	0		0	1.80826		0.435735	0.93979		1.23035	0.77938		1.26388	1.23679		0.118692	0
1.54594	0		0	1.41495		0	0.0379811		1.02607	0.770732		0.239252	0.696393		1.02058	0.0745723
1.86887	0		0	0.730107		0.424185	0		0.864448	0.556434		1.0365	0.346124		1.44107	0
0.993902	0		0.00583093	0.541644		0.749982	0.117796		1.48902	1.02297		1.32759	0.145197		0.0623432	0
1.65887	0		0	1.08633		0.402615	0.118069		1.66826	0.0206718		0.189137	0.70481		0.0483835	0
1.20355	0		0	1.76536		0.00377847	0		1.74276	1.23642		0.994557	0.619115		0.528599	0
2.318	0		0	0.763638		0	0		1.39343	0.708756		1.58123	0.148808		0.262789	0
1.29877	0.186818		0	0.728845		0	0.360216		0.560103	0.599732		0.0097672	1.22942		0.291639	0.451443
1.37797	0		0	1.37781		0	0.336259		0.769151	0.807003		0.08817	0.336259		1.66289	0
1.35493	0		0	1.0394		0	0.500321		0.922257	1.07285		0	0.756205		1.05087	0
1.2523	0		0	0.561663		0.376353	1.07766		0.147509	0.0625926		0.372938	0.0213025		0.359161	0
2.08663	0.251186		0	0.761833		0.383621	0.507018		0.447888	0.47424		1.17122	0.761833		1.72674	0
2.49043	0		0	1.03892		0	0		0.183776	0.614848		1.18196	0.276507		1.10638	0.518497
1.95941	0		0	1.15985		0.643707	0		0.933469	1.2797		0	0.523913		0.612434	0
1.93752	0		0	1.98243		0	0.14989		1.41173	1.3578		0.325611	0.879278		1.11812	0
1.56093	0		0.136952	1.32069		0.743713	0		1.51812	1.23813		1.68263	0.297393		0.396953	0
0.89921	0		0	1.12381		0.397345	0.421733		0.0800072	1.49861		1.05368	1.15872		0.650367	0
2.03437	0		0.661415	1.17218		0	0.830952		1.54981	1.36478		0.861523	0.814213		1.38179	0
2.15308	0		0	1.72144		0.433874	0.736879		0.95251	1.45619		0.695782	1.14976		1.35544	0
1.85594	0		0.696892	1.04868		0	0		1.86276	0.673171		1.40632	1.01687		0.300428	0
1.51559	0		0.0569769	1.10064		0	0.667962		1.58001	1.16853		0.708496	0.352302		0.795975	0
1.4482	0		0.163683	0.358588		0.913038	0		1.92842	1.09851		1.17031	0.988059		0.388143	0
0.744487	0		0	1.29807		0.583375	0		0.00589362	1.26619		0.825355	1.00201		0.106438	0
1.37681	0		0.0293076	0.827657		0	0		0.733609	0.0774211		0.0854655	0.497117		0.668712	0
1.82729	0		0.078364	0.934503		0	0.614744		1.85912	1.17641		0.735671	0.46241		0.80362	0
0.909782	0		0.149847	0.8098		0.576286	0.939742		0.886263	1.04694		1.64145	1.232		0	0
0.818077	0		0	0.275903		0.0114966	0		1.13655	0.994019		1.15676	0.463767		0	0
1.69809	0		0	0.429628		0	0.246138		0.577693	1.393		0	0.32672		0.745609	0
0	0		0	1.43275		0.665169	1.21472		0.555037	0.942787		1.26486	0.232054		0.421568	0
2.15242	0.0495364		0	0.819602		0.209003	0.912146		1.71988	0.59473		0.706764	0.996846		1.17295	0.328831
1.88781	0		0	0.125268		0	0		1.29344	1.02222		1.40547	0.320717		1.31124	0
1.44	0		0	0.373273		0.0057246	0.360734		1.85126	0.952712		0.442683	0		0.854049	0
1.53329	0		0	1.35012		0	0.819854		1.95147	0.5298		1.75118	0.410829		0.907061	0
1.4378	0.0376372		0	1.39851		0.317833	0.282177		0.383685	0.834669		1.27007	0.691754		0.939594	0.159219
2.38654	0		0	1.0574		0	0		0.896975	0.856347		0.544411	0.555501		1.3123	0
2.24918	0		0	1.4124		0	0.278607		1.16561	0.451827		0.671385	0.628405		1.08519	0
1.37624	0		0	1.08244		0	0.264827		1.4993	0.732449		1.18908	0.759413		0.896436	0
2.03053	0		0	0.730453		0.317568	1.06167		0.690604	0.192225		0.785181	0.596178		0.712408	0
1.86658	0		0	0.479102		0.00559063	1.05169		1.32396	0		0.806024	0.556754		1.18324	0
1.81005	0		0.331237	0.416757		0	0.404511		2.36228	1.05257		0.0723887	0.604834		0.207822	0
1.53679	0		0	1.11137		0	0		1.62886	1.22646		1.18143	0.822703		0.00565994	0
0.499459	0		0	1.35575		0.214041	0.703671		0.0288065	1.25037		0.451009	1.30167		1.16518	0
0.769295	0		0.330823	0.736639		0.82897	0.785092		0.84205	0.853635		1.29756	1.01631		0.523371	0
0.451469	0		0	0.59921		0.845859	1.63772		1.3647	0		1.20452	0		0.0429577	0.63166
1.03357	0		0.00529707	1.38232		0.339073	1.05679		1.46803	0.557347		0.615066	0.113621		0.588886	0
2.02839	0		0	1.00694		0.0927509	0.412735		2.03567	0.874043		0.437235	0.378334		0.0864037	0
1.13676	0		0.162152	0.787083		0.704433	0.702268		1.9034	0.944742		1.14613	0.842444		1.04381	0
0.00607748	0		0	0.862734		1.0463	0.957211		0.279968	0.145423		0.0240914	0.384982		1.06328	0
1.42012	0		0	1.00362		0	0.775959		0.891119	0.373363		0.00512206	0.428468		0.467302	0
1.93863	0		0	0.314485		0.144719	0.81725		0.900557	0.81725		0	0.447283		0.750228	0
1.89921	0		0	0.839151		0	0.169606		0.74581	0.0402538		0.144967	0.716577		0.0776001	0
1.98187	0		0	1.48789		0.399102	0.697216		1.20682	1.50023		0	0.242908		0.933938	0
1.73477	0		0.179471	0.872192		0	0.717172		2.20275	0.965913		0.790596	0.653404		0.454021	0
1.87453	0		0	1.5458		0	0		0.848506	1.20874		0.191423	0.432239		0.902591	0
0.420182	0		0.00486887	1.61342		0.106391	0.914379		0.885904	0.670883		0.538006	0.536988		0.400757	0
1.73542	0		0.540296	1.26133		0	0.732964		1.83602	0.389163		1.23218	0.587852		0.53486	0
2.09434	0		0.00378212	0.954475		0	0		1.34203	1.282		0	0.179759		0.972499	0
2.21727	0		0.00510084	0.942037		0	0		0.827982	0.991064		0	0.726592		0.557686	0
0.931085	0		0	0.969392		0.465536	0		0.44893	0.453719		1.15934	0.573862		0.656821	0
1.34517	0		0.743601	0.761959		0	0.310616		1.09938	0.286044		0.747823	0.647451		0	0
2.13387	0		0.00742729	0.982725		0	0.902236		0.707435	0.581603		0.517841	0.772223		0.48166	0
0.479837	0		0	1.35556		0	0.981867		0.992637	0.354787		0.705169	1.00083		0.0868664	0
1.49082	0.128326		0	1.1164		0.437338	0.242041		1.06883	0.501009		1.09615	0.971946		0.375559	0
2.31801	0		0	1.005		0	0.496016		1.53428	0.915645		1.19181	0.342632		1.49946	0
0.409665	0		0	0.962808		0.524088	0.847744		0.40414	0		0.663757	0.792917		0	0
1.68313	0		0	1.17248		0.0824355	0.52487		1.54541	0.595605		1.51476	1.20483		0.896365	0
1.21167	0		0	1.11439		0.698261	0.219718		0.853916	0.74856		0.283411	0.453213		1.11263	0
1.19933	0		0	0.778654		0	0		1.12071	0.778654		0.864861	0.919081		1.01195	0
1.1956	0.5675		0	0.686837		0.665297	0.479216		1.32922	0.382376		0.843347	1.1088		0.558327	0.0543856
1.57588	0		0	1.20817		0.137756	0		1.83271	0		0.653275	0.748023		1.10251	0.203791
1.44727	0		0	0		0.00545895	0		1.89035	1.18789		0.108811	0.546796		0.795343	0
0.28216	0		0	1.07738		0.34267	0.845567		1.19729	0.413915		1.00686	0.657783		0.581218	0.265313
1.81005	0		0	0		0.584629	0		0.491171	0.829764		0.965308	0.0164382		0.694987	0
1.8656	0		0	0.729956		0.551265	0		1.27982	0.675832		0	0.830136		0.508256	0
1.51441	0		0	0.405999		1.05006	1.88109		1.75973	0		0.343191	1.02818		0.0202651	0
1.51311	0		0	1.66712		0	0.888834		0.407175	1.10972		0.71601	0.0516887		0.0225869	0
1.55784	0		0	1.18049		0.0365312	0.386987		1.30513	1.10768		1.4001	0.0300308		0.0587036	0
1.1742	0		0	1.52133		0.276729	0.350431		1.14246	0.16272		1.54452	0.754482		0.32563	0
1.78772	0		0	1.17789		0.254305	0.478068		0.860816	1.32397		1.03678	1.17789		1.18094	0
1.16361	0		0.0837527	1.23547		0	0		1.34905	1.06523		1.70404	0.504569		0.0566071	0
1.87054	0		0	1.38358		0	0.192557		1.388	1.82626		0.117116	0.974468		2.05526	0
1.36062	0		0	1.46166		0.518223	0.726369		1.69548	1.33924		1.134	0.229274		0.862138	0
1.49778	0		0	1.28496		0	0.771036		1.8283	1.32005		0.750229	1.09363		1.13039	0
0.704938	0		0	0.117541		0.394353	0		0.485881	1.35293		0.561655	0.884551		0.565701	0
1.60091	0		0	1.12323		0	0.426144		1.76246	0.86133		0.835765	0.39254		0.492921	0
1.74294	0		0.0113088	1.21845		0.250233	1.00432		1.49584	0.656331		1.21866	0.656331		0.190951	0
1.22524	0		0	0.44814		0.318554	1.52517		1.63643	0		1.14351	0.808204		0.102481	0
1.53691	0		0	1.22127		0.306982	0		1.45383	1.06057		0.241977	1.236		0.774361	0
1.81664	0		0	1.28671		0.749092	1.67298		0.0415464	0.440204		0	0.821699		1.15741	0
1.29025	0.194261		0	0.769104		0.205126	0.535068		1.03942	0.483536		0.258795	0.728546		1.02186	0
0.737299	0		0	0.825489		1.09541	0		1.29463	0.952969		0	1.32785		0	0
1.64055	0		0	1.25344		0.138458	0		1.03339	1.23829		0.875193	1.11664		0.734865	0
1.19667	0		0	1.33262		0	0		0	1.49296		0.118549	0.802297		0	0
1.89293	0		0	1.80026		0.0617366	0.3356		1.15221	0.724361		0.544451	1.18165		1.12815	0
1.09077	0.33002		0	0.85188		0	0.476813		1.04274	0.681829		0	1.16295		0.369273	0.0477177
2.58338	0		0	1.51684		0.471733	1.4311		1.16309	0.489795		1.57441	0.719449		0.411817	0
1.94065	0		0	0.738587		0	0.787124		1.32354	0		0.179361	0.0256904		0.586946	0
1.42297	0		0.176924	0.720419		0.759768	0		1.72032	1.34578		1.11986	0.832398		0.573327	0
1.79408	0		0.180586	1.22039		0.00597963	0.745772		1.54383	0		1.33995	0.553145		0.473592	0
1.99836	0		0	0.663846		0	0.413107		1.41756	0.897619		0.93054	0.805754		0.860296	0
1.57466	0		0	1.47165		0.928453	0.560234		1.42071	0.953991		0.00524598	0.0232001		0.282246	0
2.26386	0		0.349498	0.505917		0.327407	0.396573		1.33211	0		0.602336	0.377128		0.883908	0
1.41498	0		0	0.46604		0	1.46202		2.20868	0.816051		1.21115	1.18654		0.417729	0
0.0930928	0		0.243318	0.586034		0.163742	0.83068		0.654398	0.261455		0.796009	0.678622		0	0
1.43345	0		0	0.383733		0.458084	0.144895		1.46007	0		1.42854	0.321111		0	0.613244
1.49473	0		0	0.69895		0.558076	0.521377		0.912174	0.448095		1.26133	0.38938		0.683984	0
1.40292	0		0	0.730544		0	0.131357		0.814315	0.545385		0.0741772	1.03015		1.55621	0
1.52201	0		0	1.2919		0	0.354705		1.28915	0.157264		0.0124446	0.886366		1.25583	0.0416946
1.32804	0		0	0.788457		0	0.14213		0.120093	0		0.00669341	0.476798		0.662802	0
1.99272	0		0	0.917626		0.57884	0		1.78165	0.873783		0.416255	0.873783		0	0
1.16546	0		0	1.17564		0	0.535696		1.09381	0.277654		0	0.422494		0	0
2.14777	0		0	1.12598		0.409663	1.01013		1.05043	0		0.355397	0.479367		1.36109	0
1.85068	0		0	1.40635		0.567332	0.44733		1.29998	1.06045		0.18675	0.734704		0.344052	0
1.47505	0		0	1.33719		0	0		0.272661	1.20263		0.682464	0.294517		0.272661	0
2.47811	0		0	0.894231		0	0.586806		0.962253	0.524945		1.12225	0.312441		0.348429	0
2.22359	0		0	1.73162		0	0		1.51624	1.07213		1.54359	1.20144		0.0310845	0
1.89377	0		0	1.2934		0.460566	0.476496		0.00620382	0.411238		0.814066	1.31412		0.85194	0
0.304106	0		0	0.500065		0.377617	0.871438		0	1.40657		0.540745	0.909482		0.00644125	0
0	0		0	1.22547		0.00752684	0		0.861834	0.907761		0.684198	0.334528		1.35156	0
1.88967	0		0.231155	1.36924		0.278187	0.39792		2.23699	1.64924		0.704522	1.33124		0.251583	0
1.40843	0		0.455147	1.41736		0.483979	0.602247		2.12616	0.868978		0.992117	0.638273		0.0137389	0
1.16859	0		0	1.82907		0.200675	0.158813		1.56197	0.770944		0.747227	0.780847		0.758604	0
0.648694	0		0	1.15432		0.5315	0.934106		0.524934	0.960158		1.39066	1.12568		0.344994	0
1.42883	0		0	0.899288		0.267701	0		1.91227	1.73663		0.567864	0.816259		0.384665	0
1.34681	0		0.681911	1.55954		0.00583714	1.06451		2.20207	1.11421		0.565909	0.634668		0.552522	0
0.362209	0		0.2068	1.36897		0.325562	0.083883		0.514008	0.789887		0.468324	0.847755		0.0558454	0
0.92709	0		0	0.968281		0	0.235412		0.5117	0.651697		0.369773	1.08522		0.42587	0
2.00233	0		0	0.975719		0	0.665063		1.17732	1.4399		0.633887	1.07574		0.661217	0
1.34071	0		0.191656	1.79916		0.397362	1.01116		1.21314	1.50354		1.0547	0.220439		0.294183	0
1.68786	0		0	0.905572		0.13082	0.694937		0	1.20861		0	0.640178		0.916193	0
1.6763	0		0	1.51434		0	0.737744		1.65403	1.36185		0.158081	0.576297		0.466285	0
1.25866	0		0	0.652864		0.289751	0.10897		0.846888	1.28625		1.23973	0.867753		0.926016	0
1.46564	0		0	1.28068		0.357856	0		1.36528	0.729481		0.647527	0.17674		0.611805	0
2.17018	0		0.206172	1.40121		0.117283	0.331779		1.9778	0.555707		1.47243	0.799329		0.45577	0
2.02572	0		0.222063	1.3578		0.246154	0		1.75794	1.13247		2.00885	0.222781		1.16546	0
1.63922	0		0	1.34219		0.750972	0		1.873	1.29959		0.674354	0.451103		0.106638	0
1.82324	0		0.362894	0.74393		0.659005	0		1.49399	0.585586		1.30542	1.0102		0	0
0.0415781	0		0	1.17943		0.361276	0.610886		0.952448	0.922556		0.766203	1.29541		0.0912317	0
1.26321	0		0	1.11283		0	0		0.817712	0.537422		0.229504	0.865952		0.0361909	0
1.02668	0		0	1.47722		0	0.480336		0	1.63412		0.0145012	0.764623		0.213965	0
0.978735	0		0	1.37489		0.888561	0.591011		0	0.429968		0.988064	1.14703		0.759553	0
0.294685	0		0	0		0.404755	0		1.04186	1.2714		0.689557	0.20966		0	0
1.53333	0		0	0.806327		0	0.856307		2.10354	0.775094		0	0.663321		0.00478848	0
1.65408	0		0	0.499747		0.517403	0		1.28779	1.55463		1.09529	1.22143		0.740807	0
2.11299	0		1.57881	1.11754		0.400143	0.582932		1.86857	1.67112		1.01079	0.712936		0	0
1.72133	0		0	1.35732		0	0.131703		0.867984	1.15009		0.203471	0.818425		1.1436	0
1.53626	0		0.00625778	1.25808		0	0		1.07618	1.10074		1.24691	0.939282		0.613806	0
1.64951	0		0	1.54274		0.404105	0.0709689		1.69765	0.707873		0.66505	1.08562		0.836847	0
0.467739	0		0	1.17738		0.715467	0		0.55279	0.964789		0.855347	0.917857		1.04461	0
1.60834	0		0	1.42772		0.24285	0.0227054		1.81971	0.496539		0	0.993038		0.19589	0
0.745019	0		0	0.90872		0.556128	0.889587		1.09458	0.600405		0.354234	0.788012		0.977046	0
2.26089	0		0	0.963098		0.570592	1.04524		1.22606	0.666269		0.00585545	0.728302		0.0570665	0.261626
1.41944	0.443755		0	0.943218		0.0141805	0.809148		0	0.837439		0	1.51866		0.176304	0.0624563
1.37919	0.108871		0	0		0.108222	0.378486		0.904462	1.19403		0.669091	0.92356		0.553374	0.129291
1.93719	0		0	0.771461		0	1.09235		0.0228763	1.07044		0	0.884326		0.690653	0
1.22444	0		0.382895	0.822048		0.0342229	0.402724		1.94323	1.06095		0.691003	1.19821		0.206836	0
2.04363	0		0	0.805454		0.32631	0.690438		1.87177	1.23934		1.5895	0.712358		0.894203	0
1.85927	0		0	0.677026		0.00605	0.709292		2.12066	0.457937		1.54792	0.677026		0.918268	0
1.18735	0		0	1.01461		0.0142276	0.396919		0.927612	0.991299		0.697055	0.491964		0.0282557	0
0.42767	0.0827455		0	0.644894		0.524584	1.16308		1.29287	0.431235		0.851973	1.1218		0.236525	0
1.36636	0		0	0.698854		0	0.415838		1.35183	1.03836		0.49955	0.783873		0.22062	0
0.83172	0		0	0.27246		0.586183	0.585018		0.472718	1.29475		1.29523	1.15318		0.583279	0
1.18336	0		0	0.688113		0.612266	1.36619		0.732143	0.782964		0.831898	1.25266		0.493263	0
2.21204	0.0997463		0	0.95535		0.460493	0.488177		0.726273	0.74258		0	1.25023		0.707233	0.0511163
1.88302	0		0	1.45899		0.952574	0.652773		1.23643	1.57705		1.0854	1.42716		0.58011	0
1.42527	0		0	1.07561		0.0744428	0		0.460243	1.40773		1.35678	1.31068		0.930594	0
1.99065	0		0	0.954862		0	0.393001		0	0.901589		0.764671	1.2315		1.61229	0
1.11061	0		0	1.66681		0	1.29468		1.51288	1.26496		0.994482	0.482249		0	0
2.35442	0		0.227677	1.21326		0	0.0187388		1.91938	1.35945		1.22524	1.13128		0.979045	0
2.76627	0		0.0122031	1.2913		0	0.462936		1.82845	1.38398		1.1586	1.03436		0	0
0.704743	0		0	1.55997		0.0206691	0.230491		0	0.711415		0.644473	0.773104		0.2672	0
1.14017	0		0	1.39346		0.520481	1.08172		1.65785	0.758832		0.701953	0.951694		0.727653	0
1.28058	0		0	1.22922		1.01334	0		0.161675	1.21511		0	1.27709		0.953976	0
2.07619	0		0	1.20995		0	0.985004		0.4055	1.45126		0.396571	0.78775		0.725991	0
2.20922	0		0	1.09612		0.00703843	0.400787		1.23249	1.16891		0.209521	0.492738		1.3305	0
0.558595	0		0	1.35449		0	0.732809		1.8682	0.603188		0.536287	0.687594		0.601772	0
1.38638	0		0.0062703	1.02957		0.193805	0.838476		1.93788	1.46428		1.68112	0.762412		0.699472	0
1.29521	0		0	1.00004		0.280736	0.578333		1.52648	1.00004		0.785403	1.09173		0.286283	0
1.55075	0		0	0.744489		0.319887	0.26777		1.5559	1.06598		1.34375	0.714887		0.700815	0
1.71106	0		0.00721798	0.780704		0.0285645	0.629706		0.98875	0.870028		1.58721	0.975365		0.220178	0
1.80645	0		0.291213	0.924006		0	0.736178		0.0134314	0.446433		1.40573	0.886069		1.01118	0
1.34401	0		0	0.964549		0.525946	0		0.210325	0		0.418081	1.37467		0.584354	0
0.314147	0		0	1.45504		1.31067	0.648361		0.672151	0.994419		0.593116	0.582634		0.463328	0
1.54456	0		0.177782	1.41972		0.864055	0.507852		1.94191	0.417306		1.14257	0.358761		0.0371339	0
1.74412	0		0.181355	1.30022		0.00639374	0.438884		1.99733	0.680469		0.455702	0.397031		0.00639374	0
0.862025	0		0	0.931135		0.456485	0.345911		1.75628	1.45235		0.448821	0.994251		0.0809964	0
1.16646	0		0	0.571163		0	0.0360254		0.939314	0.759472		0.00468247	0.338972		0.443737	0
1.52551	0		0	1.55012		0	0.264371		0.14923	0.27974		0.293277	0.746487		0.381095	0
0.667397	0		0	0.349644		0	1.06283		1.22092	0.365054		0.0384371	0.620121		1.12813	0
0.742416	0		0	1.27095		0.465754	0.868135		0.822682	0.92277		0.0775878	0.759491		0.731058	0
1.29296	0		0	1.27263		0	0.399691		0.868074	0.530186		0.504311	0.347673		0.283615	0
1.69813	0.471081		0	0.643215		0.286726	0.828294		1.32728	0.279412		0.522295	0.79973		1.18645	0
2.24638	0		0	0.884721		0.202821	1.68433		0.963998	0.450389		1.34061	0.909574		0.553198	0.0591704
1.22392	0		0	0		0	0.873239		1.03151	0.130559		0.102754	1.12235		0.28486	0
2.40495	0		0	0.467431		0	1.31938		0.351132	1.05331		0.911319	1.02521		0.0240943	0
1.5777	0.110414		0	0.671552		0.0063859	0.444913		0.277872	1.05356		0.0680975	1.29153		0.721271	0.19073
1.63088	0.241074		0	1.43585		0.0859949	0.597652		1.84027	0.830699		0.870527	0.506106		0.620894	0
2.16511	0		0	1.13782		0.346957	0.0846455		1.22308	0.968552		1.36182	1.26399		0.828429	0
0.799522	0		0	0.506026		0	0.674319		0.441582	0.665677		0	0.957238		1.10641	0
0.117149	0.464913		0	0.284291		0.590508	0.58175		0.354962	0.451046		0.497806	0.830017		0.73951	0.544301
2.37897	0		0	1.02058		0	0.635198		0.682186	0.949584		0.789422	1.09396		1.50021	0
1.88227	0		0	1.21179		0.198509	0.724001		1.32112	1.04913		0.01675	1.05542		0.795774	0
2.94489	0		0	0.814156		0	0.49385		0.522041	0.661637		1.0057	1.50682		0.109683	0
1.82704	0.458702		0	0.569401		0.679692	0.169902		0.75704	0.747223		0.438326	1.29351		0.749569	0
0.343358	0.113845		0	1.13078		0.876099	0.235288		0.320147	0.501458		1.51445	1.10715		1.02009	0
1.17559	0		0	0.853443		0.463413	1.07626		1.13681	1.36859		0.302837	1.42653		0.0522034	0
0.986944	0		0	1.27286		0.426758	0.356631		1.23352	1.09349		1.18821	1.40849		0.478338	0
1.36824	0		0	1.15676		0	0.715291		1.38212	1.50288		0.0706546	1.48264		0	0
1.81922	0		0	1.70449		0	0.201228		0.848143	0.804734		0.218202	1.17844		0.307449	0
1.25898	0		0	0.95706		0.0158018	1.48244		0	0.758259		0.319869	0.662143		0.856041	0
2.1936	0		0	1.27892		0	0.835633		0.192188	1.35321		0	1.17449		1.60428	0
1.79296	0		0	0.970919		0.533614	0.936947		0.473704	1.0293		0	0.704595		0.552812	0
1.56789	0		0	1.28744		0	0.382167		1.22005	1.17639		0.993149	1.06614		0.531901	0
2.14903	0		0	1.33182		0	0.925309		1.47603	0.836464		0.150266	1.21802		0.689397	0
2.25568	0		0	1.05032		0.160399	0.809085		1.53643	0.356905		1.17362	0.960683		0.613804	0
1.46258	0		0	0.113614		0	0.762221		0.887802	1.16498		0.901826	1.08695		0.11342	0
0.963323	0		0	1.59427		1.0007	0.67616		0.866966	0.836485		0.834368	0.974622		0.540147	0
2.21985	0		0	1.51246		1.02642	0.619321		0.953985	1.20511		0.643548	0.400893		1.01718	0.194264
1.40774	0		0	1.43447		0.195886	0.58743		0.92721	0.314032		0.541844	0.955017		0.108458	0
1.85131	0		0	1.09815		1.15119	0.618722		1.8032	0.775014		0.860496	1.00856		0.623704	0
2.00689	0		0	1.01985		0	0.320042		0.532407	1.05329		0.576613	0.572803		1.1684	0
2.19796	0		0	1.26946		0	0.526009		0.00512914	0.364968		0.404668	0.526009		1.27863	0
2.1848	0		0	0.537374		0.390301	0.498848		1.64322	0.895633		1.54394	0.209334		0.02248	0
0.687029	0		0	1.73405		0.617365	0.941044		0.299991	0.429939		1.40526	0.83033		0.539487	0
1.07136	0		0	1.01078		0.115148	0		0.759492	1.01983		0	0.371165		0.257742	0
1.74415	0		0	0.736929		0	0.0587672		0	0.957049		0.0882216	0.240887		0.824041	0
1.18005	0		0	1.03425		0	0.403072		0.835621	0.792387		0	0.920613		1.35	0
1.21452	0		0	1.22387		0.00623036	0.233845		1.0582	0.40388		0.00623036	0.92511		0.880646	0
0.792622	0		0	0.677984		0.108709	0.90962		0.427658	1.008		1.14036	1.088		0.699765	0
1.507	0		0	0.205138		0.728574	0.831976		0.926801	0.811959		0.00603893	1.11489		0.514229	0
1.81575	0		0	0.257927		0	0.804612		0.739952	0.843334		0.462237	0.693363		0.762431	0
1.33313	0.154241		0	0.823554		0.00534629	0.760622		0.531945	0.59115		0.382792	1.22911		0.766645	0.386975
1.37078	0		0	0.106034		0.816623	1.20868		0.867054	0.0719235		0.379817	0.998859		0.977235	0.69651
1.83104	0.247136		0.15747	0.721111		0.662988	0.358592		1.25167	0.858084		1.37787	1.16306		0.983742	0
0.595605	0		0	1.13131		0	0.49008		1.1152	1.28251		0.545221	0.94331		0.975324	0
0.838168	0		0	0.640231		0	0.164992		1.15787	0.762474		1.23709	1.07445		0.478832	0
2.4378	0		0	0.623663		0.00566521	0.283966		1.9691	0.591138		0.424195	1.00485		1.80017	0
1.86749	0		0	0.527814		0.596437	0.795993		0.688715	1.21306		0.501046	1.10398		0.269826	0
2.06848	0		0	0.633864		0	0.288398		0.996253	1.13902		0.589557	1.01164		0.704447	0
1.89579	0		0.355578	0.611242		0.00709154	1.79612		1.22119	0.330211		0.766822	1.23485		0.139285	0.239705
1.40174	0		0	0.266104		1.11033	0.91587		1.24825	1.76252		1.23761	1.03098		0.776791	0
1.94522	0.295842		0	0.124345		0.00671359	0.147461		1.40901	0.628014		0.498757	1.29422		1.13628	0.124345
1.08854	0		0	1.03302		0.245694	0.644359		0.789521	1.27589		0	1.01718		0.472854	0
2.39655	0		0	1.04133		0	0.72197		1.95268	1.23162		1.59553	1.16946		0	0
2.7297	0		0.00670752	1.25162		0.753264	0.699391		1.68667	1.36003		1.46121	0.722522		0.768983	0
0.923902	0		0	1.14258		0.00628354	0.696645		1.37211	1.31343		0.938804	1.29705		0.984579	0
0.481161	0		0	0.862396		0.293222	0.848202		0.620852	1.13247		1.62365	1.17461		0.0506715	0
1.00619	0		0	1.30438		0.48477	0.269216		0.581497	1.32984		0.816224	0.943305		0.730211	0
2.01735	0		0	1.25057		0.519461	0.762682		1.854	1.47494		0.381644	1.12615		1.14992	0
1.79871	0		0	1.46891		0	0.917453		0	0.243087		0.0247138	1.02935		0	0
1.32781	0		0	1.33162		0.650124	0.775733		0.949158	1.23037		0.359387	1.58005		0.973476	0
2.49276	0		0	0.622778		0.458036	0.860511		0.465907	1.27244		0.638328	0.258984		0.910985	0
1.82781	0		0.0219939	0.793012		0	0.453784		0.97499	1.00916		1.25326	0.69562		1.06132	0
1.23258	0		0.00530338	0.748577		0.460535	0.227366		0.752352	0.594588		0.604056	0.656651		0.726974	0
1.85047	0		0	0.963389		0.606311	0		0.575342	1.53215		0	0.613325		1.15391	0
0.488908	0		0	0.778115		0	0.767018		0.794153	1.31242		0	0.307792		0.732808	0
2.38322	0		0	1.1979		0.395604	0.816989		1.34252	0.652836		1.2518	0.595474		0.441809	0
2.20498	0		0	1.17562		1.18957	0		1.26677	0.562377		0.475928	0.428981		1.275	0
1.58382	0		0	1.12393		0.435602	0.321831		1.66283	1.53476		0	1.04858		0.199408	0
1.27449	0		0.554214	1.06419		0.453825	0		0.303929	1.01764		0.592545	0.123844		0.527819	0
1.194	0		0	0.741932		0.389705	0.401372		0.570869	1.14187		0.0136529	1.0752		0.278201	0
2.08898	0		0.104488	1.5544		0.257516	0.115799		1.05835	0.875295		0.842303	0.800972		0.512843	0
2.04343	0		0.823554	0		0	0.0979673		0	0.707675		0	0.992619		1.21701	0
1.805	0		0	1.30367		0	0.8447		1.17216	0.856761		0.0128758	0.534151		1.00194	0
1.78425	0		0	1.16659		0	0.304992		1.45706	0.727473		0.629254	0.876587		0.736067	0
1.46501	0		0	1.03462		0.330368	0.639178		0.674162	0		0.665815	0.91613		0.791663	0
2.33301	0		0	0.916171		0.201534	0.841007		0.562873	0.818452		1.46998	1.02393		0.229227	0
1.15685	0		0	0.943918		0	0.529328		1.1149	0.638715		0.411364	0.747685		1.04484	0.315323
1.16652	0		0	1.25305		0.0208366	0.160401		0.505596	0.925188		0.515076	1.3478		0.963651	0
1.92041	0		0.358771	0.223732		0	1.32391		1.10594	1.18069		1.41771	0.781751		0.224864	0
1.76928	0		0.174016	1.20735		0.952553	0.236942		1.44926	0.746974		1.85981	1.1569		0.282434	0
0.415377	0		0	0.672887		0.675379	0.72231		0.92001	0.689634		1.1394	0.689634		0.449936	0
1.26543	0		0	0.121757		0.272015	0.598857		1.62829	0.212995		1.01635	0.954324		0.867823	0
1.47039	0		0	0.936646		0	0.574197		1.93361	0.905771		0.304803	0.574197		1.01688	0
0.455258	0		0	1.40746		0	0.336163		0.160566	0.144436		0	0.70365		0.0237401	0.336163
1.42655	0		0	1.21709		0.639932	0.180746		0.674232	0.424154		0	0.731698		0.145321	0
0.983085	0		0	0.976298		0.828488	0.313124		0.137362	1.09241		0.6517	0.836098		0.575178	0
0.917104	0		0	0.730152		0.822509	0.740067		0.8543	0.869453		1.22071	1.02193		0	0
2.16124	0		0	1.26281		1.15112	0		1.26994	0.349999		0.395532	0.585687		0.502162	0
1.58431	0		0.00559349	1.04887		0.652275	0.683986		0.845599	0.750527		0.427142	0.567353		0.798767	0
1.38046	0		0	1.98211		1.07741	0.720275		1.36304	0		1.19688	0.97623		0.678535	0
1.72219	0		0.210557	1.25682		0	0.61662		1.46658	0.123259		0.67774	1.14504		0.685822	0
2.45284	0		0	0.868216		0.549028	0.631204		0.67252	0.836051		0	0.919626		1.16149	0
2.51784	0		0	1.17789		0.563381	0.222923		1.90922	1.24546		1.28208	0.240926		0.0174424	0
1.04722	0		0.0161894	1.07148		0.919081	0.28653		1.56466	0.450308		0.479188	1.03847		0.575475	0
1.93357	0		0	1.24317		0.00479674	0.266499		2.19893	0.869612		1.24734	0.954513		0.767318	0
1.54657	0		0	1.2055		0.441845	0.822203		0.483558	1.49562		0.418641	0.511699		1.82438	0
1.4819	0		0	1.27846		0.622449	0		1.15681	0.794287		0	1.17334		1.68963	0
1.61043	0		0	1.12975		0.64632	0.781191		0.956272	1.17764		0.283615	0.87405		0.600205	0
1.5014	0		0	1.37587		0	0.203276		1.19201	1.41769		0.307609	0.767898		0.321449	0
1.6586	0		0	1.29505		0.563597	0.082701		1.5347	1.22157		0.031704	0.857778		0.246211	0
2.34432	0		0	0.737691		0	0.651031		1.27393	0.279426		0.893109	0.497584		0.754102	0
1.53429	0		0	1.22358		0.551498	0		1.78748	1.24231		0.759007	0.768638		0.523992	0
2.07092	0		0	1.16911		0	0		0.622347	0.64127		0.00642184	1.32252		0.428353	0
2.61575	0		0	1.32101		0.379295	0.344059		1.57045	0.809217		0.660874	1.00343		1.03321	0
1.36344	0		0	1.28776		0.290815	0.644189		1.29412	0.954		0.40577	1.15729		0.97117	0
1.57955	0		0	0.990924		0.281783	0		0.0131979	0.556165		0.749514	0.879127		0	0
2.19913	0		0	1.33088		0.538476	0		1.5568	1.53876		1.00523	0.985752		0.954219	0
1.11413	0		0	1.04097		0	0		1.57162	0.836615		2.10016	0.656417		0.397006	0
1.7792	0		0	1.03675		0.243968	0.294606		1.05259	0.0821784		0.561287	0.706948		1.3197	0
0.937511	0		0	1.22356		0.407549	0.803752		0.302952	0.772585		1.31971	1.30114		0.597889	0
0.439305	0		0	1.33528		0.569226	0.302717		0	1.3281		0.417389	1.14689		0.70767	0
2.47886	0		0	1.00686		0	0.714025		1.30386	0.374518		0.816612	0.49552		1.14593	0
1.29635	0		0	0.699265		0.0290832	0.384651		0.694819	1.08197		0.532006	0.315062		0.679979	0
2.01284	0		0	0.821432		0.2709	0.587675		0.965627	0.446493		1.11538	0.795031		0.368456	0
1.86999	0		0	1.57508		0	0.621652		1.15356	1.54489		0.104148	1.2568		0	0
0.947196	0		0.0170117	1.41575		0.0226186	0.681971		1.27036	1.52283		0.74916	0.51589		0.163217	0
1.64878	0.523119		0	0.92947		0.0599412	1.07489		1.55286	0.40696		0.779273	0.569047		0.492422	0
2.65163	0		0	1.05818		0.00609039	2.10246		0.594704	0		1.83513	0.721156		1.31167	0.306981
2.62669	0		0.617349	1.1928		0.00591309	1.09616		2.03679	0.564809		1.04744	1.05737		0	0
0.499279	0		0	0.707903		0.216857	0.315324		0.795749	0.530756		1.7805	0.737888		0.661182	0
1.37016	0		0	0		0.469129	1.01194		0.862143	0.878166		1.39872	1.10169		0.482413	0
1.34039	0		0	0.877237		0.647595	0		1.08183	0.25446		1.24794	0.28844		0.13252	0
0.209005	0		0	1.06943		0.670017	0.126429		1.00696	0.026597		0	0.951766		0.373401	0
2.05102	0		0	0.435948		0	0.543525		1.78193	0.844598		0.731954	0.410385		0.83319	0
1.65889	0		0	1.07461		0.288164	0.900028		0.580919	1.11815		0.107442	1.16801		0.146294	0
2.03661	0		0	0.726046		0.185618	0.726046		0.990408	0.587881		1.10992	0.0188724		1.06343	0
1.78414	0		0	0.591964		0	0.149718		1.74729	0.693819		1.12643	0.517799		0.303348	0
1.98561	0.303794		0	0.419138		0	1.09458		2.01084	0.23137		0.533598	0.508411		0.212607	0
1.55734	0		0.275485	1.03914		0.643764	0.131486		1.78021	0.379611		1.57855	0.753385		0.383067	0
1.35997	0		0	1.42447		0.023041	0.126362		0.896478	0.785269		0.00581022	1.05308		1.46089	0
1.71385	0		0	0.501556		0	0.335884		0.806668	0.449323		0	1.10423		1.36983	0.0411598
0.956746	0		0	0.903877		0	0.600823		0.567712	0.524763		0.744223	0.682813		0.635956	0
1.24136	0		0	0.688538		0	0.410853		1.84831	0.566538		0.740544	0.410853		0.0128996	0
0.72402	0		0	1.22548		0.838293	0.205499		0.120231	0.879752		1.19028	0.721602		1.60384	0
2.53893	0		0.00623579	0.903802		0	0.960903		0.986812	0.566273		1.72903	0.196903		0.765919	0
2.16459	0		0	1.08254		0.425409	0.38109		1.27876	1.25638		0.184754	1.03562		0.918509	0
1.7881	0		0	1.08975		0.212943	0.460428		1.70337	0.157476		0.373322	1.01315		0.0218356	0
1.0285	0		0	0.881236		0.473977	0.634475		0.662766	0.483726		0.312736	0.849498		0.917097	0
1.83706	0		0	1.01431		0.388673	0.377388		1.55636	0.403247		0.609015	1.00036		0.384689	0
0.997716	0		0.0901043	1.20591		0.556401	1.10241		1.96344	0.23651		1.57095	1.1747		0.0484334	0
0	0		0.480472	1.23467		0.856761	0.673997		0	1.17045		0.451805	0.906307		0.710829	0
1.30883	0.0882389		0	1.1205		0.199115	0.69129		1.70249	0.70049		1.04919	0.928747		0.022927	0
1.29622	0		0.205069	1.36776		0	0.215751		1.9199	0.870954		1.47742	0.273748		0.749703	0
1.31428	0		0	1.11669		0.383581	0.54446		0.859099	1.019		1.66599	0.818208		0.809483	0
1.56326	0		0	1.06975		0	0.147364		0	0.541835		0.824797	0.87975		1.11523	0
0.845217	0		0	1.00628		0.479233	0.60818		0.714431	1.15189		1.65173	0.185788		0.216355	0
1.1758	0		0.363712	1.3293		0.73751	0		0.642397	0		0.286651	1.23595		0.4429	0
0.883433	0		0	0.553687		0	0		0.908194	0.0579383		0.047379	0.64536		0	0
1.46602	0		0.107358	1.09448		0	0		0.82942	0.318774		1.22788	0.722738		0.545417	0
0	0		0	1.11797		0	0.33607		0	0.399859		1.10686	1.25833		0.934237	0
1.43943	0		0	0.68164		0.762228	1.67617		0	0.255461		1.1761	0.222725		0.359633	0.17152
1.81709	0		0.230569	0.883332		0	0.963805		1.38723	0.521252		0.49974	0.982951		0.239113	0.322138
0.859632	0		0	1.26875		0.54823	1.07967		0.338782	0.156165		1.26701	0.731163		0.859632	0.100421
1.17799	0		0	0.607296		0	0.467976		0	1.28806		0	0.876461		0.0114615	0
0.116334	0		0	1.45721		0.29468	0.019886		0	0.458984		0.16399	0.39342		0	0
1.73737	0		0	1.14077		0.72305	0.618239		1.08806	0.960047		0.824392	0.261198		0.869455	0
1.29062	0		0	0.489862		0	0		0.739517	1.57131		0.617497	0.502278		1.22566	0
1.05804	0		0	1.14221		0.537254	0.900118		0.0238258	1.3487		0.693469	0.853391		0.0355292	0
1.19238	0.0730402		0	0.616512		0.465728	1.43091		1.02577	0.564028		0.402749	0.759219		0.591726	0.0371868
0.825545	0		0	1.05479		0.914437	0.390852		0	1.2273		0.791156	0.205976		0	0
1.14156	0		0	1.15081		0.455399	0.497174		0.106927	1.50195		0.0124612	0.72251		0.947765	0
0.934719	0		0	1.41326		0.873333	0.01241		0	0.920668		1.08208	0.573358		0.575659	0
2.20235	0		0	0.775749		0	0.467323		1.86991	0.175773		0.385517	0.739721		0.640794	0
2.17575	0		0	1.43134		0	0.0870764		0.789322	0.941903		0.181598	1.41379		0.524639	0
1.47004	0		0	1.37867		0	0.776584		1.20777	1.37867		0.869196	0.525088		0.746407	0
2.44803	0		0.37443	1.31898		0.169455	0.416007		0.748083	0.597912		1.71588	0.816717		0.969634	0
1.92599	0		0.00667702	1.57716		0.34264	0.372083		1.92404	1.33049		1.13902	0.712309		0.988887	0
1.39283	0		0.793212	0.339947		0.60299	0		1.42006	1.06881		0.999496	0.23895		0.52208	0
2.41347	0		0	0.964269		0	0.15039		1.34623	0.858303		0.708747	0.38293		1.26411	0
1.95944	0		0	0.482616		0	0.32435		1.03592	1.2262		1.08918	0.515838		1.46341	0
1.75124	0		0	1.01271		0	0.211025		1.23517	1.60098		0.797271	0.662572		0.501792	0
0.791971	0		0	1.64935		0	0.258502		0	0.823422		0.863917	0.277306		0	0
1.98636	0		0	1.02501		0	0.103432		1.70375	1.21656		0.198909	0.462754		0.191947	0
1.84159	0		0.0614612	1.33779		0.24033	0.675733		1.60814	1.1253		1.22103	0.31096		0.052909	0
0.855594	0		0	0.580943		0.33014	0.197877		1.04154	0.617004		0.164907	0.717985		0.487039	0
0.871899	0		0	1.12789		0.474779	0.427191		1.57138	0.650587		0.758961	0.930148		0	0
2.6243	0		0	1.41604		0.0082368	1.20614		1.08804	0.215158		1.32727	0.641969		0	0
0.301692	0		0	0.946803		0.0222284	0.463053		0.464929	0.905146		1.3076	1.03276		0.621452	0
0	0		0	1.22933		0.145068	1.74089		0.910885	0.127038		1.00711	1.0364		0.162529	0.192986
2.14047	0		0	1.32553		0	0.613784		1.62622	1.07047		0.473618	1.24171		0.262285	0
1.71325	0.198473		0	0.723243		0.485872	0.800099		1.41222	0.152424		1.30025	0.449254		0	0
0.361547	0		0	0.993687		1.08384	0.519074		0.964474	0.506339		1.04839	0.339346		0.703869	0
2.02299	0		0	1.16716		0.153731	0.8188		1.32042	1.27583		1.06957	0.848838		0.816124	0
1.90585	0.0996489		0	1.16329		0.400217	0		1.39318	0.273341		0.722247	0.585757		0.510774	0
0.700666	0		0.477214	1.19439		0	0.869566		1.55312	0.0244465		1.54509	0.920129		0.00628513	0
1.62387	0		0	1.07706		0.15716	0		0.77642	0.260711		0.694893	0.734786		0.238974	0
2.54484	0		0	1.11886		0.754811	0.874607		0.978888	0.465207		0.688326	0.434996		0.828596	0
2.04276	0		0	0.872332		0.249062	0.647859		0.421506	0.903585		0.599316	0.760481		0.59171	0
1.56251	0		0	0.693353		0	1.09889		1.43809	0.978583		0.948288	0.131079		0	0
2.32083	0		0.0114718	0.602721		0.466372	0.384872		1.56657	0.888151		0.109194	0.791677		0.144759	0
1.96535	0		0.290076	1.16847		0.402954	0.560321		1.67321	0.687849		1.69439	0.52843		0.692237	0
1.6254	0		0.38841	1.26454		0.603681	0.709248		1.76203	0.562179		1.88653	1.12648		0.630435	0
1.3977	0		0	1.44414		0	0		1.60371	0.692868		0.508626	0.962829		1.2226	0
1.15113	0		0	0.985379		0.0676214	0.846202		1.06812	0.684474		1.47203	0.773339		1.03388	0
0.85844	0		0	1.52381		0	0.73088		1.36319	0.559943		1.41673	0.967622		0	0
2.04882	0		0	1.21158		0.091003	0		0.616183	0.738647		0.0598212	0.842958		1.16742	0
1.78902	0		0	1.4557		0.278667	0.385016		1.57336	0		1.37489	0.0819382		0.682334	0
1.27075	0		0	1.44713		0.342161	0.580447		0.675781	0.27048		1.5787	0.238372		0.322654	0
2.27787	0		0	0.44386		0	0.513096		0.50104	0.888017		0.50104	0.626789		0.188371	0
1.28751	0		0	0.843201		0.0130335	1.0807		1.45235	0.356475		0.60598	0.177875		0.0258994	0
2.20741	0		0	0.49688		0.575537	0.843267		0.808678	0.919418		0.604293	0.540659		0.853854	0.285921
2.48425	0		0	0.530663		0	0.118362		0.916671	1.10208		0.196519	1.11981		1.06806	0
2.62786	0		0	0.810361		1.04173	0		1.18252	0.906547		0.374738	1.01918		0.681657	0
1.8513	0		0	0.896226		0.0100211	0.86025		1.8832	0.754071		1.0607	0.774234		0.885876	0.487204
0.946568	0		0	0.983188		0.00652163	0.465587		0.949103	0.742504		0.677199	1.09548		0.763147	0.275851
0.652712	0		0	1.3222		0	0.235053		0.99319	0.935736		1.02419	1.46381		0.846527	0
2.66322	0		0	0.748675		0	1.17198		0.527828	0.706462		1.11148	1.62207		0.0896039	0
1.44333	0		0	1.17935		0	0.0824676		0.708007	0.471093		0	1.16336		0.886515	0
1.48898	0		0.00733907	1.59008		0	0.360325		1.0674	0.796947		0.150189	1.11351		1.24135	0
1.80684	0		0.00533362	0		0.352403	0.37069		1.60627	1.00461		0.499012	0.139395		1.62645	0
2.70005	0		0	0.316044		0	0.767418		1.67797	1.19646		0.776068	0.672215		0	0
1.34635	0		0	0.782514		0.719144	0.307726		1.67458	1.13088		1.58843	1.06733		0.264835	0
1.484	0		0	1.23434		0	0.347454		0.584765	0.721508		0.718462	0		1.30212	0
0.909183	0		0	0.218792		1.01753	0.341901		0.785301	0.581135		1.16804	1.21319		0.0404875	0.151044
1.76735	0		0.223192	1.34596		0.42276	0.73173		1.68292	1.29046		0.751445	0.780421		0.96523	0
1.78487	0		0	1.52199		0.484978	0.369953		0.589155	0.639394		0.152385	0.976225		1.68446	0
1.59391	0		0	1.30505		0.787417	0.407205		1.36954	0.779346		1.3754	0.29984		0.0115057	0
1.26688	0		0	1.15053		0	0.702219		1.17929	0.89617		0.031845	1.01478		0	0
1.89451	0		0	1.63555		0.453806	0		0.935346	0.627549		0	1.47161		0.212857	0
1.89409	0		0	1.96657		0	0.636495		1.43333	1.1282		0	1.01487		0.379631	0
0.557958	0		0	0.82981		0	0.140489		1.08206	1.04084		0.00689378	0.402531		0.96004	0
2.3986	0		0	0.743865		0.444279	0.38951		0.820102	1.50081		0.718742	0.58833		1.64187	0
2.09869	0		0	1.22114		0	0.145332		1.97036	0.577802		1.13381	1.18763		0.742112	0
2.20288	0		0	0.543643		0.135298	0.374317		1.31323	0.269679		0.912351	0.823934		1.02242	0
2.1096	0		0	0.754293		0.372736	0		1.89738	0.184569		0.662084	1.10757		1.37579	0
1.83047	0		0	1.56862		0.222642	1.01958		1.09266	0.890898		0.854064	0.42632		1.01233	0
1.5228	0		0.0156697	1.0159		0.298213	0.593353		0.87998	1.06596		0.0156697	0.931806		1.40988	0
1.23762	0		0	1.14634		0.56595	0.702107		0.569669	1.51312		0.81527	1.08843		0.134837	0
0.413743	0		0	1.37213		0.43972	0.708653		0.00496308	1.33829		1.20103	1.29302		0.0719777	0
2.49816	0		0.00661309	1.11663		0.358566	0.775232		1.07527	0.675818		0.18153	1.16264		1.06389	0
2.01446	0		0	1.32242		0.102575	0.756529		1.35863	1.38309		0.999913	0.715651		0.998019	0
1.44486	0		0.48922	1.49935		0.163682	0.961316		1.20787	1.14664		0.0338414	0.66304		0.0611933	0
1.50992	0		0	1.42798		0.805071	0.714207		0.809766	0.85939		0	0.79425		0.587791	0
2.2593	0		0	1.35067		0	0		1.27354	1.2513		1.166	1.2513		0.0172005	0
1.83966	0		0	1.30866		0.724547	0.525622		0.678825	0.886343		1.01919	0.690166		0.943136	0
1.50256	0		0	0.673958		0.413747	1.19102		0.697768	1.59728		0.777764	1.52519		1.07487	0
0.592901	0		0	1.08233		0.571664	0.966847		0	1.10923		0.0932711	1.24549		0.390645	0
1.84631	0		0	1.04194		0	0.340443		0.581546	0.539165		0	0.625445		1.54225	0
1.33696	0		0	1.36058		0	0.0823911		1.37379	1.20604		0.629019	0.548112		0.993937	0
1.18595	0		0	1.53256		0	0.21248		0.0218881	1.40552		0	0.926505		0.0538474	0
2.13468	0		0	0.946627		0.39001	0		1.2088	0.627764		0.400264	0.0473827		0.254054	0
0.691737	0		0	1.38552		0.297593	0.67572		0.478245	1.41037		1.19986	1.39054		0.691737	0
2.08191	0		0	1.23783		0	0.629109		0.311213	0.995825		0	0.554562		1.05216	0
2.11428	0		0	0.91432		0	0		0.770721	1.04384		0.565917	0.842674		0.457844	0
1.105	0		0	1.35412		0.398215	0.317117		1.14017	0.971505		0	1.08489		0.576192	0
0.659304	0		0	1.16801		0.572825	0		0.949803	0.200129		0.84398	1.12971		0	0
2.22935	0		0	0.938844		0	0.711976		1.32663	0		0.696218	0.0829627		0	0
1.71138	0		0	1.17246		0.581502	0		1.28792	0.681448		0.508062	0.905967		0.658893	0
2.23404	0		0	0.768841		0.0102093	0.768841		0.667418	0		0.971482	0.160067		0.943916	0.268961
2.392	0		0	0.999636		0.834992	0.431231		1.64063	0.721896		0.443259	0		0.85213	0
1.17993	0		0	1.34999		0.00530232	0		1.06767	0.414007		1.3779	1.06641		0	0.018151
0.657062	0		0	1.30065		0.276774	0.0177719		0.114177	0.209531		0.434555	0.35791		0.069032	0
1.65141	0.205162		0	1.09614		0.600863	0.751246		0.852998	0.845176		1.30889	0.786432		0.928106	0.235607
0.803027	0		0	0.977652		0.398207	0		1.06639	1.04748		0.50021	1.12062		0	0
2.32546	0		0	1.27426		0	0		0	0.748564		0.0205898	0.644532		0.0256716	0
1.19283	0		0	0.804466		0	0.596809		0.341095	0.959567		0	1.58576		1.07393	0
1.17781	0		0	0.663461		0.420693	0.483503		0.0558833	0.606999		0.14922	0.988647		0.956869	0
0.902486	0		0	1.33816		1.22385	0.288257		0.60499	1.10014		0.988448	0.799772		0.512178	0.0274611
1.00985	0		0	0.546752		0.731644	0.742548		0.174951	0.28842		0.979027	0.714069		0.484021	0
2.52289	0.0196999		0	1.00462		0.00524279	0.51667		0.713341	0.0579722		1.74404	1.15328		1.1721	0.245713
2.56139	0		0	1.08911		0.212626	0.252726		0.416682	0.492666		0.969608	0.899425		0.306728	0.0203298
1.39222	0.359005		0	0.888756		0	0.326739		0.418469	0.92546		0.0435766	0.715721		0.129772	0
1.63539	0		0	1.5071		0.713454	0.80745		0.703403	0.926681		1.64725	1.08848		0.756518	0
2.02372	0		0	0.488722		0.125244	0.898556		1.50673	0.648542		0.236534	0.141608		0.0690388	0
1.44164	0		0	0.970102		0.212205	0.381972		0	0.511278		1.0068	1.13899		1.13563	0
1.13423	0		0	1.45355		0.514752	0.165202		1.47387	0.0439287		0.368466	1.11295		0.308486	0
2.12866	0		0	0.965577		0	0.201811		1.52441	0.711365		0.971069	0.437531		0.00574056	0
2.10711	0		0	0.991712		0.656038	0.847612		1.66125	0.0223594		1.03226	0.531187		0.398517	0
1.93334	0		0	0.999183		0	0.460598		1.16379	0.728774		1.20387	1.48004		0.776467	0
1.44297	0		0	1.29602		0	0.411331		1.03716	0.744857		0.578504	1.06559		1.34133	0
1.4044	0		0	1.37978		0.312297	1.20743		0	0.744659		0.611715	1.6215		0.783931	0
0.456431	0		0	0.950286		0.491482	0.348885		1.15708	1.14742		1.30214	0.694131		0.357663	0
2.16258	0		0	1.17298		0	0.833678		0.0289853	0.676524		0.882749	0.356082		0.693108	0
1.36267	0		0	1.59835		0.209069	0.318098		1.45293	0.515287		1.13721	1.01982		0.805794	0
2.8336	0		0	1.29292		0.457729	0.522714		0.801787	0.74125		1.66011	1.24466		1.22097	0
1.99746	0		0	0.650559		0.317473	0.125873		1.80887	1.3626		1.57625	0.684955		0.314151	0
2.13456	0		0	1.38822		0.450501	0.3781		1.72988	1.30115		0.898074	0.926136		0.380858	0
2.03656	0		0	1.2855		0.324792	0.472378		0.340295	0.976396		1.57862	1.07269		0.640381	0
0.827864	0		0.904371	1.72809		1.14553	0.529954		1.44705	1.01056		0.479153	1.18518		1.40572	0
2.27056	0		0.308858	1.47014		0	0.50354		0	0.43117		0.0442405	1.09935		0.67109	0
1.71211	0		0	1.13043		0	0.44943		0	1.08978		0.962848	1.05603		0.852112	0
1.48435	0		0	1.47769		0	0.648752		1.44267	1.02417		1.05471	1.15005		0.422205	0
1.62549	0		0	1.54691		0.138186	1.32901		1.68324	1.39038		0.747361	1.11841		0.272678	0
1.34624	0		0	1.09794		0.0362561	0.768187		0.727896	1.34119		0.968416	1.18239		1.24523	0
1.10075	0		0	1.22772		0	0.28521		0.775477	1.09891		0.251213	0.455888		0.984657	0
1.21561	0		0	1.51007		0.575536	0.162419		0.405855	1.13663		0.00542639	1.09161		0.934243	0
2.48599	0		0	1.53913		0	0.265095		0.0997425	1.28288		0.928261	0.802931		1.28023	0
1.88449	0		0	1.26631		0	1.07848		0.979812	1.2552		0	0.888161		1.38068	0
1.60371	0		0	1.42836		0.576031	1.16139		0.493778	0.84011		0.565205	1.04214		0.638634	0
1.45953	0		0	1.56756		0.500466	0		0.55055	0.690342		0.0346897	0.805548		0.658492	0
0.918621	0		0	1.01519		0.607446	0.486793		0.462018	0.812786		0.543951	0.486793		0.233902	0
2.17859	0		0	1.43316		0.452992	0.523591		0.819256	1.18031		1.08121	1.39126		1.90538	0
0.924206	0		0	1.25996		0	0.242837		0.809352	0.620006		0	1.09619		0.216118	0
2.05258	0		0	1.58952		0.103667	0		0.513418	1.07904		0.700267	1.20833		1.13604	0
2.05637	0		0	1.07921		0	0.654889		1.23098	0.499229		0	0.5955		0.179677	0
2.30924	0		0	1.24258		0	0.710546		0	0.400724		0.477797	0.510079		0.792953	0
1.82585	0		0	1.6178		0.578691	0.240635		0	1.05275		0.163915	1.35981		1.06303	0
1.22163	0		0	0		0.849269	0.915526		1.34144	0.772503		1.23407	0.464889		0.0749863	0
1.92728	0		0	1.21516		0	0.163659		0.914128	1.16714		0	0.656782		0.865296	0
1.2513	0		0	1.02207		0	0.707436		0.493899	0.40076		0.59425	0.547382		0.2516	0
1.8843	0		0	1.19128		0.00551669	0.883605		1.01292	0.387438		1.09947	0.543635		0.592035	0
2.13206	0		0	0.726436		0.428802	0		1.03989	0.269317		0.943572	0.0277098		0.449306	0
2.33524	0		0	1.27669		0	0.788152		1.24194	0.346112		0	1.00685		1.00082	0
2.22172	0		0	0.539601		1.10134	1.37868		0.0465255	0.24826		0.566448	0.914558		0.0982034	0
1.05811	0		0	1.37109		1.19521	0		0.843504	1.57133		0.606835	1.1613		0.491663	0
2.21391	0		0	0.55629		0.277706	0.542867		1.7704	1.35079		1.15514	0.669619		0.553619	0
2.1039	0		0	0.400507		0.0069912	0.637285		0.925213	1.16468		0.788314	0.400507		1.06272	0
2.12261	0		0	0.982208		0	0.602012		1.2231	0.699859		0.695519	1.08244		1.68138	0
2.39198	0		0	0.496462		0.64812	0.689928		0.632094	1.02687		1.22271	1.40564		1.59461	0
1.61879	0		0	0.680431		0.817047	0		0.920307	1.08863		0.563809	1.07457		1.07915	0
1.49807	0		0	0.855532		0	0		0.329587	1.57031		0.432687	1.26964		1.26655	0
1.79967	0		0	0.990598		0.0171776	0.47805		0.331261	0.495984		0	1.44794		0.0171776	0
2.06757	0		0	0.669564		0	0.786822		1.27761	1.49478		0	0.525717		0	0
1.68902	0		0	1.27146		0.655174	0.0907898		1.36902	0.509988		0.753367	0.932018		0.903475	0
2.24653	0		0	1.14092		0	0.74546		0.813093	0		0.684562	0.829415		1.54201	0
0.770473	0		0	1.38273		0.923152	0.391682		0	0.448935		0	0.90906		1.21911	0
2.33987	0		0	1.13326		0.368621	0.633624		1.44943	0.905854		1.31059	1.06305		1.28946	0
1.94956	0		0	1.10274		0.47602	0.859051		0.687957	1.4176		0.28509	0.60171		0.600274	0
1.2335	0		0	1.12702		0.744348	0.300979		1.14673	1.05774		0	0.824518		1.07676	0
2.35905	0		0	1.33228		0.424208	0.0638175		2.22803	0.948389		0.465669	0.408937		0.354831	0
1.14433	0		0	1.16025		0	0.979874		0.797429	1.17987		0	0.540115		0.919422	0
1.35581	0		0	0.335281		0.468858	1.01427		0.904744	1.05588		0.685156	1.22083		1.29427	0.0457977
1.96191	0		0	1.1927		0	0.602425		0.00541416	0.975724		0.768414	0.86608		1.71564	0
1.58603	0		0	1.34194		0.518024	0.714719		0.505506	0.806159		0	1.02347		1.26337	0
1.06008	0		0	1.23636		0	0.691531		0.837958	0.371235		0.00597137	1.44098		0.845701	0
1.67101	0		0	0.7637		0	1.08685		1.03076	0		0.163632	1.26687		0.830847	0
1.91044	0		0	0.895793		0.304372	0		1.39559	1.0454		0.858396	0.710593		0	0
1.2237	0		0	1.44495		0.00534225	0.821323		1.79937	1.40599		0.574757	1.04815		0.509351	0
1.07707	0.343609		0	0.330303		0	1.14528		1.44009	0.513395		1.04466	0.998667		0.273742	0
1.51638	0		0	1.06384		0.436622	1.14252		0.53581	0.885047		0	1.21546		0.853781	0
1.95828	0.439677		0	1.27083		0	0.259147		0.908825	0.243811		0.824577	1.13469		0.737911	0
1.79702	0		0	1.02272		0.821158	0.807727		1.22204	0.960802		0.123878	0.864008		0.690222	0
2.32964	0		0	0.681085		0.426363	1.16883		0.263492	1.56719		0.229218	1.09741		0.0940928	0
2.35713	0		0	0.925185		0.492456	0.724644		0	1.11924		0.933692	0.463288		0.32263	0
1.99487	0		0	0.773609		0.469376	0.357154		0.74106	0.954291		1.37066	0.820042		0.618266	0
2.0858	0		0	0.683921		0.908902	1.00345		0.723229	0.302611		1.87945	0.864696		0.843773	0
1.59752	0.118871		0	0.715821		0	0.225102		0.832328	1.19638		0	1.14033		0.968703	0
1.25198	0		0	0.848526		0.453815	1.21529		0.676984	0		0.920273	0.755739		0.721867	0.0369484
2.11677	0		0	0.976613		0	0.361614		0.397944	0.865686		1.13935	0.789537		0.932539	0
1.11771	0.14235		0	0		0	0.392579		0.978441	0.727964		0.238168	1.39569		0.651202	0.543017
1.63601	0.358473		0	0.916442		0.213299	0.658177		0.717646	0.916442		0	1.12711		1.33523	0
0.944953	0		0	1.05313		0	0.860383		0.722785	0.530617		0.576234	1.57711		1.15357	0
1.37906	0		0	0.176735		0.0593394	0.470892		0.377419	0.917712		0.238226	0.873867		0.503286	0
0.569212	0.248655		0	0.863382		0.0994595	0.473078		0.0342642	0.545756		0.172467	1.02769		0.65969	0.309656
0.97841	0		0	0.345868		0	1.51766		0.762682	0.129043		0.932808	1.06091		1.03944	0.14619
1.44795	0		0	0.230919		0.156524	0.598415		1.38416	0.796993		0.982461	1.17493		0.50343	0
1.14471	0		0	0.978945		0.359631	0.212995		1.85918	0.236692		0.379056	0.697566		0.583629	0
1.50076	0		0	1.06018		0.935424	0.436447		0.545144	0.850022		1.15334	0.850022		0.38111	0
1.45428	0		0.0698836	1.29122		0.0238413	0.529806		1.08735	0.699614		0.249592	0.910084		0	0
1.77512	0.223202		0.264219	0.924131		0.00478872	0.479685		2.19691	0.758443		0.913433	0.592183		0.572579	0
1.40606	0		0	0.824422		0.571854	0.447448		0.0493551	0.636515		0.012569	0.589488		1.42297	0
1.57624	0		0.00539692	0.499411		0.329036	0.573069		0.693711	0.913658		0.24372	1.06101		0.774213	0.210188
1.44421	0		0	1.23357		0.00596829	0.593965		0.647047	0.663173		0	1.27522		1.17521	0.23077
1.95041	0		0	0.925978		0.00482906	1.06031		1.0755	0.736595		0.251228	0.787408		0.937612	0
1.65691	0		0	0.799185		0.677893	0.806799		1.04195	0.19963		0.691666	1.19225		0.965199	0.445247
1.84933	0		0	0.967539		0.346029	0.714974		1.51678	0.942427		0.44319	1.2838		0.607863	0
1.63947	0.12033		0.215979	0.870578		0.763766	0.376156		0.766056	0.791009		0.951325	1.08952		0.393496	0.136396
2.29304	0		0	0.454088		0.134477	0.638709		0.985549	1.27713		0	1.01383		0.861799	0
1.89204	0		0	0		0.0368046	0.529839		1.90468	0.781891		1.28508	1.1301		0.546023	0.55446
1.79772	0.291396		0	1.08017		0.526768	0.918452		1.14806	0.252741		0.0512695	0.692131		0.581711	0
1.76437	0		0	1.30501		0	0.310527		1.41552	0.855493		1.42945	0.966975		0.609567	0
2.31812	0.0162031		0	0.72357		0	0.606003		1.10429	0.74706		1.17801	0.431171		0.792605	0
1.67345	0		0.163963	0.082238		0.960664	0.344602		1.46689	1.34249		0.82931	1.22377		0.0530107	0
2.05435	0		0	0.73738		0	0.888392		0.66646	0.949556		1.52581	0.678634		1.35249	0
1.30702	0		0	0.875204		1.0719	1.04488		0.855469	0.943913		0.0525005	1.09179		0.234768	0
2.26815	0.370436		0	0.564617		0	0.99593		1.72623	0.83002		0.521761	1.08719		0.674161	0.173696
1.14124	0.0798801		0	0.153849		0.376882	0.458753		0.570039	1.33782		0.812402	1.44137		0.438493	0.235944
2.03287	0		0	0.249898		0	1.42416		1.9904	0.199512		1.2506	1.12041		0.701131	0.563637
1.07919	0		0	0.919313		0.0635892	0.709195		1.34393	1.28699		0.866573	1.20695		0.553088	0
2.11224	0		0	1.08822		0	0.557063		0.938617	1.10735		0.176736	1.09464		0.715833	0
1.94313	0.163105		0	1.19972		0	0		0.341536	0.516666		0.590295	1.02522		1.5178	0
1.07643	0		0	1.2708		0.580984	0.252555		0.637119	1.55499		1.30103	0.712331		0.0373262	0
0.911376	0		0	1.24468		0.551267	0.137923		0.390149	1.14225		1.51841	1.10096		0.00559843	0
1.8526	0.228308		0	1.17685		0.424555	0.706007		1.09608	0.843765		1.2141	1.00474		0.535696	0.806303
2.12693	0		0	0.677897		0.0130391	0.157113		1.59683	1.09544		0.336685	0.921931		0	0
1.8991	0.369588		0.640683	0.924366		0	0.56539		1.86685	0.0649173		0.673422	1.08769		0.232431	0
1.91355	0		0.110085	1.11873		0	0.463008		1.34621	1.45804		0.631864	1.44425		0	0
1.5232	0		0	1.24333		0.204196	0.414203		1.25907	1.24333		0.829107	0.876025		0.49583	0
1.28756	0.21854		0	1.37456		0.00472519	0.536828		1.74352	0.536828		0.608862	0.865727		0.720865	0.182195
1.10363	0		0	1.02996		0	0.95661		0.460367	1.08622		1.05936	1.19551		0.10242	0
2.32403	0		0	1.17916		0	0.86542		0.977199	0.949528		0	1.29411		0.805932	0
2.04687	0.685342		0	1.43496		0	0.504586		1.24659	1.19923		0.940869	0.978799		1.32386	0
2.65218	0		0	0.0762952		0	0.654899		0.979274	0.759105		1.61157	0.491184		0	0
0.877219	0.490099		0	0.550243		0	0.748185		0	0		1.05569	1.08114		0.00503838	0.284343
1.77616	0		0	0.814008		0	0.866738		0.0645132	1.23665		1.04012	1.50218		0.216985	0
0.508684	0		0	0.696518		0.569901	0.433144		0.381289	0.208905		0.350631	0.696518		0.069373	0
1.44634	0		0	1.07234		0.115602	0.0463704		0.495322	0.855553		1.35094	0.793123		0.611776	0
0	0		0	0		0	1.48762		1.17612	0.575443		0.307139	0.575443		0.0812069	0
0.00826695	0		0	1.06145		0.00414202	0		0	1.1683		0.292931	0.725034		0.358837	0
1.37678	0		0	0.85019		0.207137	0.344067		1.1025	0.732713		0.407411	0.177752		0.459891	0
0.894133	0		0.0476703	1.19345		0.0097176	0.106267		1.52677	0.906737		0.54667	1.33086		0.0615393	0
0.709613	0		0	1.55168		0	0.292552		0.279361	0.792235		0.410203	0.58387		0	0
2.36096	0		0	1.20303		0.00551538	0.503661		0.343069	0.624121		1.62017	1.09312		0	0
1.52979	0		0.00681459	0.93327		0	0.404895		1.06503	0.906138		0.418498	0.868776		2.04579	0
1.02599	0		0	1.11718		0	0.62		0.967602	0.577087		0.490341	0.930453		1.16631	0
2.09838	0		0	0		0	0.213157		0	1.35345		0.605263	0.894155		0.291354	0
1.69253	0		0	0.656495		0	0.897132		1.42356	0.863675		1.02642	0.279744		0.895958	0
2.69812	0		0	1.12308		0	0.338457		1.18863	0.944235		1.099	0.792242		0.658987	0
0.572493	0		0	0.199031		0	1.23035		1.63773	0.565746		0.478291	0.971401		0.432351	0.113436
1.62018	0		0.0909629	0.794909		0.204355	0		1.78523	0.571514		0.494324	0.339857		0.00902849	0
1.80515	0.42112		0	1.25664		0	0.349906		1.76228	0.154928		0.586366	0.813949		0.293984	0.0410396
0.954717	0.458172		0.381221	1.05884		0.324066	0.381817		1.32455	0.28176		1.11594	1.05074		0.306615	0
0.966387	0		0	1.34152		0.880831	0.202526		0.602232	1.36568		1.25177	0.433419		0.768008	0
1.17943	0		0	0.590685		0.428089	0.34567		1.84159	0.269799		0.203148	0.635418		0	0
1.80077	0		0	0.991265		0.326444	0.469581		1.72694	0.482421		0	0.301088		2.4593	0
1.89339	0		0	1.14057		0.617476	0.246474		0	0		0	0.770582		1.93537	0
0.831075	0		0.396034	0.890577		0.49585	0.771855		2.00888	0		1.20944	0.617695		0.431724	0
1.51825	0		0	1.29474		0.301791	0.0789701		0.853116	0.505235		1.35949	1.23681		0.832299	0
1.70007	0		0	1.13241		0.0514691	0.336184		1.38137	1.01		0	0.887946		0.566489	0
2.51031	0		0	0.363357		0.00474229	0.436762		1.26367	0		1.3706	0.505144		0.170071	0
1.7852	0		0	0.539053		0.00700198	0.621362		1.58918	0.305418		0.961687	0.621362		0.0744505	0
1.9282	0		0	1.23084		0.601181	0.258594		0.731851	0.769809		0.366234	0.540399		1.31573	0
2.37953	0.243166		0	1.33293		0.00499764	0.511947		1.73686	0.523663		1.13439	0.751785		0.255099	0.128956
1.45286	0		0	1.39995		0.00487661	0.949924		0	1.23439		0.407807	0.724381		0.541517	0
1.25996	0		0.272795	0.368643		0.668704	0.541269		1.65827	0.805695		1.05276	1.26017		0.0729752	0
1.94911	0		0	1.26775		0.674901	0.591838		1.06367	0.727131		1.09291	0.918496		1.05516	0
0.966349	0		0	0.901925		0	1.13492		1.11035	0.349518		0.0187571	1.22266		0.00942251	0
2.16718	0		0	0.850099		0.00628822	1.22941		1.52509	0.695599		0.259651	0.545672		1.05333	0.0543256
0.462516	0		0	0.275266		0.937305	1.09677		0.0050136	0.275266		1.45562	1.17459		0.100343	0.0719114
1.23248	0		0	1.45822		0.454784	0.252737		0.450318	1.03313		0.179506	0.556315		0.519489	0
1.75765	0		0	1.39908		0	0.321104		0.639714	1.2826		0	0.95693		0.470868	0
1.60469	0		0.380138	1.40907		0.101038	0.473937		2.03474	0.977286		0.692846	0.847529		0.457069	0
1.09159	0		0	1.6589		0.418174	0.545932		1.76117	1.8457		1.425	1.48225		1.13571	0
1.22571	0		0	1.11423		0	0		0	1.16871		0.0328781	0.685973		0	0
0.695567	0		0	1.26781		0.610194	0.331302		0.65911	0.788532		1.37058	0.579733		0	0
0.035823	0		0	0.902428		0.157179	0		1.19692	1.0428		0.451967	0.66759		0.00606033	0
1.08304	0		0	0.950634		0.0420412	0		1.30243	0.542091		1.07024	0.742205		1.12049	0
0.899342	0		0	1.11016		0.00948419	0.863246		0	0.652864		0.00475334	0.916035		1.44456	0
1.84601	0		0.29502	1.12666		0	0.896726		1.15968	0.827681		1.33973	0.929539		0	0
1.93767	0		0	0.315619		0	1.13235		1.8409	0.402		0.678144	1.43895		1.26605	0
0.771788	0		0	1.16475		0.0108669	0.683127		0.830622	1.94981		1.28559	0.923899		0.847149	0
1.35872	0.213684		0	0.860531		0.761398	1.05171		1.38319	0		1.21455	0.832667		0.063857	0.600473
1.15458	0		0.0151143	0.683749		0.110428	0		1.49105	0.786007		0.9571	0.955485		0	0
1.85696	0		0.487033	1.43012		0.399989	1.4961		1.51016	0.161613		0.797976	0.938725		0.112178	0.492159
1.19435	0		0	0		0.0791707	0.415479		1.04188	0.0650256		1.2478	0.085794		0.656613	0
1.81353	0		0	1.25933		0	0.420033		0.0049702	0.420033		0.00991581	1.38451		0.896058	0.245614
1.26614	0		0	0.227554		0	0.936644		1.63457	0.569043		0.16081	0.773858		0	0
1.85903	0		0	0.757128		0	0.460958		1.10521	0.410461		0.244166	0.793094		1.13263	0
1.20425	0		0.417504	1.07737		0.849373	0.829115		1.21476	0.157778		1.07562	1.18746		0.0633501	0
1.46366	0		0.705114	0.983171		0.0154747	0.300212		0.975721	0.422138		1.50259	0.110391		0.373119	0
0.590006	0		0	0.637403		0.523776	0.849015		1.21801	0.201217		0.915349	0.337331		0.00524114	0
1.52857	0		0	0.842681		0	0.369207		2.34703	1.37915		0.890967	1.06698		0.211884	0
2.47559	0		0.719062	1.03516		0	0.689393		1.06116	1.33074		0.636496	0.804053		0	0
1.64723	0		0	1.13486		0.125205	0		1.22664	1.25345		1.20155	0.967749		0.776453	0
1.48744	0		0	1.08231		0.344044	0		1.14703	1.21031		0.552103	0.866582		0.101544	0
2.03445	0		0.198628	1.41939		0	0.436146		1.77935	0.730078		1.82979	0.493388		0.638819	0
1.74701	0		0	0.3238		0.375955	0.0586221		0.962096	0.232399		1.40867	1.19826		0.445042	0.0958774
1.02917	0		0.150474	1.36385		0.504277	0.756645		1.64568	1.07448		1.77012	0.879319		0.0185634	0
1.68161	0		0	1.07508		0	0.615512		1.88767	1.29472		1.14634	0		0.954165	0
0.618269	0		0	1.08762		0.986197	1.41578		0	0		0.587367	1.13343		0.317406	0
2.27999	0		0	0.960044		0.631405	0.720278		2.10775	0		1.78471	0.343788		0	0
2.16189	0		0.257396	0.906391		0.578197	1.33153		0.949334	0		0.730625	0.855447		0.303592	0.298883
1.57239	0		0	1.47654		0.0056157	0.249244		1.73493	0.495666		1.15314	0.683732		0.0440666	0
1.14917	0		0.204981	1.00952		0.57616	0.368638		1.77444	0.606164		1.10871	0.897548		0	0
2.2474	0		0.0103941	1.53158		0	0		1.46021	0.787775		0.163496	0.0295224		1.34869	0
2.09143	0		0.150242	1.47835		0.00521591	0.131967		1.11685	0.279485		1.03484	1.26392		0.272902	0
1.20102	0		0	0.699428		0.347067	0.50393		0.802408	1.00334		0.796189	0.820095		1.41275	0
2.01442	0		0.120911	0.795711		0.647814	0.443513		1.23264	0.291841		1.26778	0.650759		0.414821	0
2.22845	0.596529		0	0.820281		0	1.15147		0.866759	0.0187945		0.199906	1.1693		0.468103	0
1.00916	0		0.210049	1.49319		0	0.905068		1.87295	1.29467		1.60804	1.40086		0.514019	0
1.51657	0		0	0		0	0.0542873		0.911157	0.911349		0.498158	0.722691		0.356761	0
0.660452	0		0	0.774206		0.99282	0.0165603		0.687098	0.685715		1.26866	0.0165603		0.912182	0
1.11875	0		0.345152	1.135		0.187394	0.955274		1.04709	0.261249		0.54473	0.823959		0.740678	0
2.43101	0		0	1.30169		0	0.617021		1.0147	0		1.01306	0.314107		0.166214	0
0.493094	0		0	1.66414		0.336335	0.862548		0.981615	0.367099		0.571343	0.504205		0.29406	0
1.4427	0		0	1.00726		0	1.49073		1.63922	0.179904		0.929579	1.2135		0.824373	0
0.379178	0		0	0.923863		0.820725	0		0	0.483296		1.12236	0.346616		0.773158	0
1.92762	0		0	0.521511		0	1.02241		0.863872	0.0193704		0.160799	0.803		0.00579811	0
1.71283	0		0	0.635824		0.140431	0.167438		1.08519	0.573607		1.37391	0		0.511443	0
1.21476	0		0	0.509576		0.434408	0.30237		0.614259	0.458382		0.53573	0.546322		0.57878	0.0205556
1.74738	0		0	0.365122		0.790713	1.00822		1.61594	0.480551		1.62019	0.861259		0	0
0.575519	0		0	1.06596		0.655459	0.916224		0.36405	0.503059		0.740921	0.68343		0.00950138	0
1.50942	0		0	1.33937		0	0.641292		0.983791	0.587259		0.54512	1.02169		0.331926	0
2.13553	0		0	1.36706		0	0.508458		1.03355	0.709548		0.509834	0.709548		0	0
1.68593	0		0	1.8899		0	0.64442		1.94776	0.938928		0.726997	1.47408		0	0
2.09951	0		0	1.33061		0	1.44332		1.10004	0		0.01126	0.277413		1.31005	0
1.52944	0.507218		0	0.484223		0.00636768	0.472523		0.961709	0.604617		0.470299	0.800633		0.539679	0.373649
1.86049	0		0.005255	0.107827		0	0.768964		0.986099	0.8693		0	1.04404		1.21207	0
1.49038	0		0.0827379	1.29775		0	0		1.93982	0.232495		1.27591	0.490142		1.61906	0
1.27121	0		0.239691	0.238565		0.473401	0.72124		0.335271	0.961861		1.1477	0.545447		0.594746	0
1.61015	0		0	0.578286		0	0.600556		1.38842	0.674814		1.24338	0.95786		1.4366	0
1.48723	0		0.237374	1.54138		0.268577	0.506159		0.881899	0.447743		1.04683	0.218924		0.179376	0
0.973974	0		0	0.783706		1.04453	0.583917		0	0		0.954998	1.72271		0.631028	0
1.52688	0		0.00514241	1.18273		0	0.123043		1.35236	0.421163		1.66377	0.232592		1.24403	0
1.09955	0		0	1.04736		0	0		0	1.44634		0.244997	0.983192		0.503429	0
0.382802	0		0	0.17421		0.602021	0.322526		0.00426966	0.9743		0	0.7006		0	0
0.775573	0		0	0.338974		0	0		0.72915	0		0.218091	0.937465		0.274819	0
1.165	0		0	1.58217		0	1.00886		1.06072	0.378886		0.267376	1.11937		0.488263	0
1.64913	0		0	1.01695		0	1.40493		0.823842	0		0.448609	0.8145		0.629363	0
1.42649	0		0	1.4473		0	0.406582		0	0.740153		0.811545	0.44303		0.00507403	0
0.601885	0		0	1.09483		0.00300845	0.833037		0	0.337587		0.477249	0.764219		0.623114	0
1.00311	0		0.249984	0.411371		0.478375	0		0.00566403	0.645607		1.14104	0.844807		0	0
1.07167	0		0.317275	1.13614		0.645417	0.107319		0.178632	0.495898		1.317	1.4508		0.355378	0
1.33368	0.0704198		0.122857	1.18225		0	0.493712		1.82419	0.256063		1.19112	1.44183		1.32213	0
1.55783	0		0	1.53833		0	1.15832		1.49602	0.683845		0.212022	0.399273		0.407216	0
2.43313	0.214246		0	0.786017		0.519696	0.335195		0.940983	0.540452		1.17681	1.06864		0.299415	0
0.292464	0		0	1.43112		0.595627	0.425636		0	0.992438		1.03524	0.859416		0.636743	0
1.99873	0		0	1.1812		0	0		1.28947	0		0.778938	1.00405		0.473911	0
1.11845	0.660429		0	0.913493		0.670419	1.0821		0.938088	0.62909		1.08692	1.06166		0.460606	0.492878
1.75454	0		0	1.07486		0	0.27884		1.40457	0.27884		0.602732	0.3864		0	0
2.01152	0		0	0.36984		0	0		0.822836	0.357878		0.284975	0.75083		0.243552	0
1.73984	0		0.0102802	0.724407		0	0.497788		2.03867	0.698733		0.413098	0.626862		0.0405015	0
0.719135	0		0.405817	1.38121		0.405817	0		0.590545	1.27202		1.04818	0.424805		0.170386	0
0.532426	0		0	1.48647		0	0.322201		0.947974	1.20727		1.29449	0.761034		0	0
1.7611	0		0	1.16634		0.00640455	0.353723		1.13586	1.16081		0.817903	0.931497		1.23405	0
1.88426	0		0	1.44338		0.242317	0.269232		0.649192	1.32507		0.452838	1.43476		1.77168	0
2.11052	0		0	1.59985		1.03201	0.42729		1.67507	1.10595		1.25174	1.31389		0.55162	0
1.65487	0		0	1.44882		0.765844	1.08956		1.03067	1.49857		1.58531	1.01369		0	0
1.71753	0		0	1.63877		0	0.790264		0.714477	1.38878		0.210189	0.647689		0.820092	0
1.56812	0		0	1.2126		0.461048	0.289141		0.0623797	1.23943		0	1.4778		0	0
1.98782	0		0	1.12122		0	0.612779		1.31335	0.518473		0.463069	0.778285		0.0104619	0
0.0484217	0		0	1.19062		0	0.781683		0.293997	0.352139		0	0.781683		0.980129	0
0.64718	0		0	1.57188		0.679428	0.381355		0.743256	0.953941		0.639588	0.649209		0.518197	0
2.17621	0		0	1.08143		0	0.43927		0.282512	1.34323		0	0.851075		0.163022	0
1.76475	0		0	1.29624		0	0		0.613075	1.64276		1.10808	0.467269		1.36792	0
2.51933	0		0	1.43736		0	0.22544		1.6544	1.01889		1.36663	0.61836		0.439984	0
1.69692	0		0	1.57379		0	0.43594		0.929206	0.891546		0.837346	0.618452		0.5386	0
1.27921	0		0	1.42679		0	0		0.834908	1.04769		0.182582	0.987477		1.38618	0
1.56121	0		0	1.71419		0	0.333499		0.0291363	1.09166		0.243683	0.899114		1.19874	0
1.24665	0		0	0.752301		0	0.183099		1.71433	1.05618		0.739185	1.68088		0.359724	0
1.96956	0		0	1.35759		0	0.868816		1.80443	1.19798		0.00555093	0.963692		1.06981	0
0	0		0	0.998124		0.521854	0.998124		1.31597	0.773448		0.285434	0.0186512		0.442557	0
1.88322	0		0	0.795795		0	0.643676		0.833552	1.44259		0.367882	1.4749		0.934329	0
0.72999	0		0	1.44756		0.635314	0.433159		1.83322	1.37258		0	1.10056		0.10955	0
0.189216	0		0	1.42905		0.665676	0.777872		1.73169	1.14254		0.269751	0.263172		0.00561401	0
1.85539	0		0	1.54452		0	0.729632		1.70012	1.49388		1.35638	1.43661		0	0
1.2402	0		0	1.41748		0.33116	0.98354		0	1.32536		0.368548	0.599474		0.871274	0
1.27895	0		0	0.961884		0	0.26648		1.27647	0.773602		0.726283	1.05365		1.20711	0
1.69336	0		0	1.34143		0	0.633262		0.132399	1.43232		0.318781	1.0962		0.535216	0
1.22745	0		0	1.09122		0	0.343473		1.27256	0.752638		0.0111844	1.26138		0.945695	0
1.42995	0		0	1.13765		0.0950532	0.672326		1.11936	1.07936		0	0.504413		0	0
1.32257	0		0	0.557803		0.869246	0.508		0.916124	0.548039		0.00570729	0.497735		0.153566	0
1.27153	0		0	1.01133		0	0.420773		1.37613	1.73328		0.266408	1.67377		0	0
1.90747	0		0	1.07088		0	0.0986438		0.854023	1.07973		1.37353	1.32794		0.911054	0
1.81189	0		0	1.05516		0.0272522	0.578505		1.21667	1.1563		0	0.66074		0.627548	0
1.4267	0		0.316121	0.807779		0	0.603558		1.61159	0.528738		0.472606	1.01211		0.542531	0
1.0359	0		0	1.37972		0.19379	0.602155		1.02104	1.27255		1.48378	1.2465		0.572225	0
1.07625	0		0	1.42978		0	0.210385		0.76604	1.10095		0	0.904956		1.44442	0
1.65218	0		0	1.35675		0	0.819842		1.06987	1.65295		0.841232	0.448789		0	0
1.75311	0		0	1.32229		0.991913	0.812236		0.813295	1.64556		1.17708	1.20204		0	0
2.00551	0		0	1.32501		0	0.735761		1.33703	0.893425		0.887683	1.38477		1.10207	0
2.35095	0		0	1.48818		0.00579086	0.85477		0	1.48818		1.44609	1.6026		1.18858	0
0.174721	0		0	1.53896		0.248852	0.555665		0.366669	1.2708		0.942151	0.72218		0.052076	0
0	0		0	0.999025		0.0540957	0.742053		1.46547	1.63703		0.0435082	0.687307		0.191633	0
1.32853	0		0	1.09067		0.0119952	1.00152		0.805096	1.70739		0.720713	1.28394		0.95742	0
1.67841	0		0	1.30798		0.120143	0.52392		0.897796	0.714055		0.29574	1.2295		0.16819	0
1.15485	0		0	1.10401		0.698391	0.685455		0.726443	1.46537		0	0.988802		0	0
1.24055	0		0	1.70128		0.154797	0.477385		1.0652	0.791051		0	0.333543		0	0
1.91548	0		0	0.900812		0	0		1.22156	1.38859		0.275684	0.656767		0.266719	0
1.57273	0		0	1.40006		0.94818	0		0.859401	1.08746		0.626626	0.468153		0.139782	0
1.92509	0		0	1.28998		0.584964	0.0334062		2.29335	0.445014		0.00604981	0.865336		1.22108	0
0.742313	0		0.118789	0.954496		0.0114013	0.532297		1.46713	1.31252		0.329205	0.569133		0.45683	0
1.80834	0		0.368641	1.28882		0.0452732	0.654385		1.53875	1.48367		0.464048	1.09037		0.0671637	0
2.45263	0		0	1.36753		0.598282	0.265746		1.03783	1.31899		0.497798	0.944975		0.0166885	0
0.810538	0		0	1.07848		0	0		0.604827	0.958946		0.44777	1.02899		0.0108033	0
1.50391	0		0	1.23302		0	0.528773		1.12197	1.67601		0.00529591	1.60114		1.385	0
1.35715	0		0	1.36588		0.0870909	0.259563		1.02909	0.944188		0	0.674566		0.333682	0
1.80173	0		0	1.42776		0	0.743435		0.887402	0.992695		0.634805	0.647383		0.794895	0
1.31228	0		0	1.14586		0	0.114308		1.02733	1.3033		0.87339	0.604524		1.24944	0
2.0614	0		0	1.06903		0	0.680972		0.0615566	1.09548		0.626769	1.2633		1.25912	0
2.19025	0		0	1.2159		0	0.375472		0	1.40507		0	1.25454		0.927058	0
0.926305	0		0	1.13314		0.0397358	0.498588		0.0732548	1.09062		1.46065	0.691794		0.579632	0
1.40169	0		0	0.852801		0	0.60031		0.0115537	0.98219		0.880422	0.387754		0	0
0.794246	0		0	1.18352		0.373471	0.481166		0.820689	0.542878		0.697114	1.17083		0.0160409	0
2.01701	0		0.587419	1.32989		0.00483278	0.263729		1.62512	1.21524		1.33758	0.296309		0.0610746	0
1.65051	0		0	1.09958		0.271106	0.351086		1.27389	1.04474		0.656836	1.15156		0	0
1.67657	0		0	1.4079		0.879877	0.496647		0.846703	0.738811		0.513552	1.00673		0	0
1.72183	0		0	0.843233		0	0.502928		1.17506	1.3213		1.40969	1.28488		0.0684719	0
2.20904	0		0	1.20488		0.278096	0.586816		0.0771029	1.08736		0.242798	0.755764		1.77896	0
1.43637	0		0	0.68807		0	0.698171		1.33981	0.855902		0.92204	0.233188		0.846321	0
1.82249	0		0	1.47574		0.735045	0.315237		1.3592	1.62844		0	0.520373		1.0493	0
1.41083	0		0	0.903173		0	0.464391		0.934811	0.919558		1.11017	0.894879		0.0346783	0
2.49371	0		0	0.449097		0	1.07965		0.495898	0.414033		1.22166	0.51574		0.0173568	0
2.46809	0		0	0.888187		0.81365	0.702344		0	1.3697		0.931954	1.01013		1.61034	0
1.18481	0		0	1.14692		0	0.01851		0.197355	1.10449		0.418361	0.139291		0.44201	0
0	0		0	0		0	0.438455		2.01248	1.56366		0	1.28612		0	0
1.92256	0		0	1.07175		0.0799633	0.930742		1.55616	1.64609		0.452114	1.00373		0.984341	0
0.383333	0		0	0.662454		0.502535	0.420005		0.00561272	1.16073		0.982702	1.09309		1.18082	0
1.12347	0		0	1.31262		0.43442	0.512306		0.910719	1.11408		1.34054	1.04038		0	0
1.52059	0		0	0.343718		1.17082	0.599036		0.633759	0.283783		0.443882	1.0166		0.950997	0
2.60261	0		0	0.0971653		0	0		1.44742	1.24399		0	1.28998		0	0
0	0		0	1.15917		0	0.154136		0.738354	0.801573		0.212193	0.907863		0.378433	0
1.37076	0		0.317274	0.905901		0.00539671	0.443268		1.99288	0.517195		0.50366	0.540671		0	0
1.33327	0		0	0.88466		0.00501154	0.88466		0.975667	0.440889		0	0.805343		0.0726572	0
1.73073	0		0	0.481925		0	0.432944		1.68351	0.528619		0	1.09412		0.137954	0
0.845366	0		0.255279	0.607861		0.671655	0.59669		1.75645	0.920195		1.75336	1.15141		0.026491	0.133496
0.424876	0.249967		0	0.777719		0.762761	0.410196		1.17995	0.710255		0.107822	0.500232		0	0
1.01839	0		0	0.812749		0.916533	0.0978477		0.721939	1.21931		0.748993	0.746775		0.631094	0
1.69842	0.281466		0	0.22201		0.545224	0.920532		0.458812	0.71867		0.77972	0.709306		0.0534686	0
0.757843	0.132073		0	0		0.47828	0.534127		0.806713	0.991139		0.566435	0.651151		0.806713	0
2.48479	0.426013		0.0047893	0		0.372442	0.0210231		0.0468911	0.961137		0.147062	0.0210231		0.0142996	0
1.44041	0		0	0.885583		0.32781	0.330904		0.736606	0.709106		0.811792	0.910807		1.29696	0
1.862	0		0	0.670747		0	0.583905		1.61607	0.918176		0.0146127	1.10296		0	0
1.82875	0		0	0.62424		0	0		1.22039	0.509969		0	0.904862		0.404416	0
2.22395	0		0	1.47801		0.713391	0.857706		1.29644	0.368681		0.478554	0.699747		1.33206	0
2.38409	0.415673		0	0.290929		0	0.567697		1.14267	0.132936		0.592298	1.50037		0.368382	0
1.79555	0		0	1.15222		0.026731	0		1.2614	0.528251		0.252446	0.855802		0.239737	0
0	0		0	1.15018		0.00446795	0.264075		0.0650095	1.55946		0.0523413	1.46927		0.690195	0
1.52556	0		0.00462555	0.8555		0.117942	0.676055		1.33995	0.779691		0.430357	0.535603		0.22343	0
0	0		0	1.0982		0.0851997	0.287527		0.0359655	1.7535		0.284864	0.89345		0.98164	0
2.30731	0		0	0.681451		0.340504	0.105255		0.906286	1.08299		0.797987	0.441455		0.950014	0
1.72755	0		0.017007	0.8798		0.499261	0.374457		1.4778	0.468524		0.956953	0.869833		0.431978	0
2.28977	0		0	1.15204		0.354601	0.29484		1.82291	0.707413		0.735126	1.19187		0.690414	0
0.603478	0		0.00529664	0.577969		0.174948	0		0.582937	0.916847		0.766593	1.11553		0	0
0.0984984	0		0.00516228	1.24718		0.250494	0.556269		0.466998	0.787964		0.912516	1.1003		0.489455	0
2.03358	0		0.00468589	0.248312		0.00468589	0.0424492		0.774509	0		0.248276	0.248312		0.0139923	0
2.0807	0		0.341549	1.51515		0.167635	0.528329		0.390229	1.11628		0.78113	0.680332		0.705487	0
2.15809	0		0	1.29798		0.24937	0.648491		1.89677	0.743265		0.633699	0.618215		0.656091	0
1.65362	0		0	1.30604		0	0.287927		1.55715	0.368027		0.290401	0.62461		0.252506	0
0.767565	0		0	1.0712		0.230926	0		0.54881	0.835718		0.669097	1.02833		0.100597	0
1.08442	0		0.00368009	1.53533		0.625992	0.448681		0	1.59452		0.655136	0.800594		0.0847867	0
0.0619766	0		0.00531398	0		0	0.0973365		0.963079	1.27574		1.24019	1.04386		0.00531398	0
1.42982	0		0	0.976203		0.2059	0		1.1251	1.3611		0	0.750108		0.0170019	0
2.25266	0		0.445001	1.37565		0.299481	0.148725		1.67894	1.18258		0.82294	1.18802		0	0
1.07057	0		0	0.929821		0.37751	0.617567		1.64865	0.698014		0.956545	0.698014		0.932498	0
1.4823	0		0	1.31694		0.417579	0.303656		1.73163	0.235943		0.47088	0.766912		0.0753219	0
1.82237	0		0.0668669	0.723864		0.667002	0.0544078		1.7657	0.998692		0.643921	1.18027		0.799757	0
2.55702	0		0	1.37228		0	0.753151		0.027699	1.15121		0.498338	1.33929		0.179487	0
1.82581	0		0	1.14139		0	0.65611		0	0.782791		0.00801077	0.520732		0.772987	0
0.787534	0		0	1.38092		0.00961468	0.421684		0.986198	1.0019		1.03026	0.930632		0	0
0.510797	0		0	1.54709		0	0.743878		0	1.14917		0.202184	1.21369		0.483539	0
0.549685	0		0	1.19406		0.0882942	0.846226		1.03579	1.18828		0.814354	0.715718		0.709371	0
2.12168	0		0	1.03084		0.507854	0.345155		1.65925	1.51629		0.348819	0.857327		0.258688	0
1.59342	0		0.171363	1.39119		0.0329996	0		1.50912	1.33799		0.0283515	1.19638		0.11744	0
1.87593	0		0	0.566269		0	0		2.01497	0.861106		0.028649	0.925593		0.220771	0
0.357667	0		0	1.31539		0.0316428	0.256263		1.68498	1.53082		1.59129	1.00543		0.062315	0
2.41564	0		0.260477	1.14508		0.00940168	0.036902		2.00144	1.21996		1.16932	0.737235		0.0416284	0
2.03778	0		0	0.741631		0.302243	0		1.31404	1.12381		0	1.20023		0.899596	0
0.614652	0		0	1.01171		0.0387292	0.26373		1.28404	0.644656		0.353825	1.09585		1.01424	0
2.61479	0		0	1.2097		0	0		2.03479	1.20393		0	0.283527		0.441601	0
0	0		0	1.0396		0	0.546676		1.04739	1.57361		0	1.20908		0	0
2.13592	0		0	1.46408		0	0.706528		0	1.44225		0.208768	0.619983		0.298799	0
0.222233	0		0	1.05596		0	0.0526675		0.833042	0.384368		0.246837	0.808179		0	0
0.277073	0		0	1.43641		0	1.16465		0.00691653	0.884989		1.73413	0.504858		0	0
0.306139	0		0	1.04298		0	0		0	1.27895		0.6411	1.36613		0	0
1.39247	0		0	1.07706		0.955412	0.562497		0	0.896911		0	0.584319		0.905902	0
1.03462	0		0	1.02733		0	0.202286		0.17121	0.703764		1.45176	0.543728		0	0
0	0		0	1.16253		0	0.936248		0	0.242753		0.223825	0.302512		0	0.273079
1.004	0.49497		0	0.991511		0.306044	0		0.851286	0.219037		0.737356	1.12234		0.727576	0
1.89385	0.417211		0	0.765699		0	0.524905		1.57633	0.590753		0.56351	0.478467		0.276234	0
0.878369	0		0	0.848122		0	1.00437		2.07567	0.790098		0.632368	0.910558		0	0
1.61715	0		0.26422	1.08473		0.260468	0		2.21435	0.520315		0.624987	1.12888		0	0
0	0		0	1.22592		0	0.589135		0.83715	0.776008		1.22727	0.499633		0.886618	0
1.78579	0		0.278364	0.575159		0.262033	0.711258		2.23657	0.973569		0.518425	0.764356		0.555937	0
1.71293	0		0	1.01903		0	0.836655		2.13332	0.939542		0.874376	0.844956		1.04333	0
1.3609	0		0	0.914735		0.0243276	0.64232		0.0995377	0.805904		0.0183009	0.813064		1.18532	0
1.67069	0		0	0.90939		0.0785704	0.597432		0.787932	0.954307		0.206095	0.463307		1.32516	0.618136
2.40079	0		0	1.07944		0.337382	0.186088		1.58101	1.17334		0.840908	0.956334		0.018928	0
1.71001	0		0	0.633259		0	0.346186		1.01288	1.35502		0	0.482733		1.22348	0
3.0177	0		0	0.705231		0	0.0468977		2.34306	0.656631		1.16238	1.27893		0	0.13457
1.84811	0		0	1.16387		0.782919	0.539846		1.81846	0		0.19517	0.826221		0.648248	0
2.14137	0		0	0.764941		0.900573	0		0.114891	0.353609		0.0367772	0.614318		1.17795	0
2.45854	0		0	0.899515		0.579477	0.552855		1.19679	0.831328		0.404511	0.791335		1.94428	0
[truncated: 1,628 more rows]
