# Supplementary material for: Activity-dependent tuning of intrinsic excitability in mouse and human neurogliaform cells
Source: eLife journal article supplement (doi:10.7554/elife.57571), 2020-06-04
Supplement: supp [file elife-57571-supp-v1.zip › elife_poa_e57571_Figure_7_figure_supplement_1_source_data_1.xlsx]

## Sheet: Figure7-figure supplement1B,C,D
		Supp Fig 5B						Supp Fig 5C						Supp Fig 5D
		sEPSC amplitude (pA)						sEPSC frequency (Hz)						sEPSC tau decay (ms)
		BF1	BF2	BF3	BF4			BF1	BF2	BF3	BF4			BF1	BF2	BF3	BF4
	1	9.3	7.8	8.7	8		1	4.76667	3.83333	4.23333	6.8		1	2.1	2.7	2.1	2.4
	2	10.2	8.4	9.1	8.7		2	5.13333	4.43333	5.13333	3.16667		2	4.3	3.23333	2.4	2.73333
	3	10.5	9.2	8.1	8.6		3	4.53333	3.2	4.5	2.16667		3	2.33333	3.33333	3.7	3.66666
	4	10	11	10.5	7.2		4	3.8	3.1	3.03333	4.1		4	1.89	1.53	2.2	2
	5	12.3	11.2	9.6	9.2		5	4.3	3.23333	2.4	2.73333		5	1.26	1.72	1.6	1.3
	6	8.4	7.9	7.5	9		6	2.33333	3.33333	3.7	3.66666		6	1.98	1.3	1.7	1.8
	Shapiro Wilk Normaiity Test						Shapiro Wilk Normaiity Test						Shapiro Wilk Normaiity Test
	p	0.93					p	0.34					p	0.09
	W	0.96					W	0.89					W	0.81
	NORMALLY DISTRUBUTED						NORMALLY DISTRUBUTED						NORMALLY DISTRUBUTED
	BF1 versus BF4						BF1 versus BF4						BF1 versus BF4
	paired t-test						paired t-test						paired t-test
	t	3.09					t	0.4931					t	0.062
	W	5					W	5					W	5
	p value	0.02697					p value	0.64283					p value	0.95
