# Supplementary material for: Activity-dependent tuning of intrinsic excitability in mouse and human neurogliaform cells
Source: eLife journal article supplement (doi:10.7554/elife.57571), 2020-06-04
Supplement: supp [file elife-57571-supp-v1.zip › elife_poa_e57571_Figure_7_source_data_1.xlsx]

## Sheet: Figure 7B,C,D
	baseline				AmmTx3									baseline	baseline		AmmtX	AmmtX
	EPSC1	EPSC2	PP		EPSC1	EPSC2	PP							EPSP1	EPSP2		EPSP1	EPSP2
1	115	164	1.42609		130	171	1.31538							9	16.6		11.4	27.1
2	130	213	1.63846		107	138	1.28972							13.4	34		14.1	42.8
3	106	272	2.56604		148	273	1.84459							7.9	19.4		12.3	33.6
4	103	184	1.78641		93	181	1.94624							6.45	17		8.9	22.8
5	254	364	1.43307		324	466	1.43827							10.77	20.4		17.9	30
6	115	204	1.77391		169	261	1.54438							9.5	19.6		12	32
7	86	158	1.83721		157	341	2.17197							5.8	15.1		10.4	32.2
mean	129.857	222.714	1.78017		161.143	261.571	1.65008							8.97429	20.3		12.4286	31.5
SEM	21.3066	27.5894	0.145312		28.9987	43.1486	0.128715							0.984291	2.39354		1.09712	2.34084
Figure 7B								Figure 7C						Figure 7C
EPSC1			EPSC2					PP						EPSP1			EPSP2
Shapiro Wilk Normaiity Test			Shapiro Wilk Normaiity Test					Shapiro Wilk Normaiity Test						Shapiro Wilk Normaiity Test			Shapiro Wilk Normaiity Test
p	0.006		0.148					p	0.078					p	0.96		0.015
W	0.68		0.85					W	0.82					W	0.97		0.73
NOT NORMALLY DISTRUBUTED			NORMALLY DISTRIBUTED					NORMALLY DISTRUBUTED						NORMALLY DISTRUBUTED			NOT NORMALLY DISTRUBUTED
EPSC1 baseline vs AmmTx3			EPSC2 baseline vs AmmTx3					PP baseline vs AmmTx3						EPSP1 baseline vs AmmTx3			EPSP2 baseline vs AmmTx3
Wilcoxin Sign Rank test			Paired two-tailed t-test					Paired two-tailed t-test						Paired two-tailed t-test			Wilcoxin Sign Rank test
Z	-1.61		t	-1.22				t	0.98					t	-4.36		Z	-2.28
W	4		DF	6				DF	6					DF	6		W	0
p value	0.11		p	0.27				p	0.36					p	0.005		p value	0.016

## Sheet: Figure 7H
EPSP SPIKE COUPLING PROBABILITY
	baseline	STP-SE
	5 sweeps	5 sweeps
1	0	0.9
2	0	0.23333
3	0	0.56667
4	0	1
5	0.13333	0.6
5	0.1	0.93333
6	0.23333	0.8
7	0	0.83333
8	0.2	0.8
9	0.03333	0.66667
ES probability
Shapiro Wilk Normaiity Test
p	0.013
W	0.79
NOT NORMALLY DISTRUBUTED
Wilcoxin Sign Rank test
Z	-2.76
W	0
p value	0.002
