# Supplementary figures and images for: Activity-dependent tuning of intrinsic excitability in mouse and human neurogliaform cells
Source: eLife journal article supplement (doi:10.7554/elife.57571), 2020-06-04

Figure 3-figure supplement 1

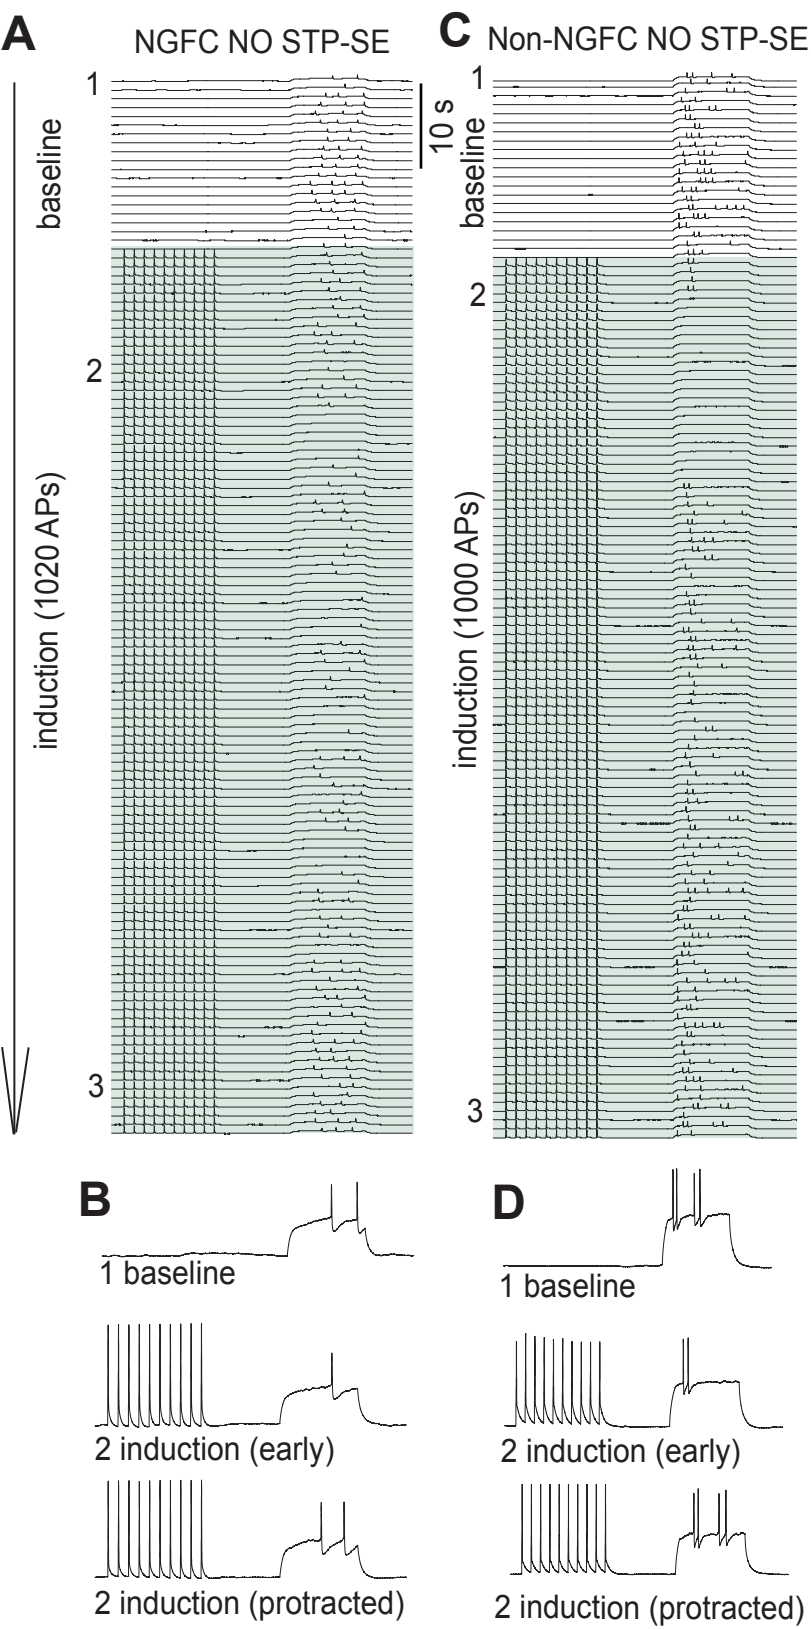

Supplement: supp [file elife-57571-supp-v1.zip]

Figure 6-figure supplement 1

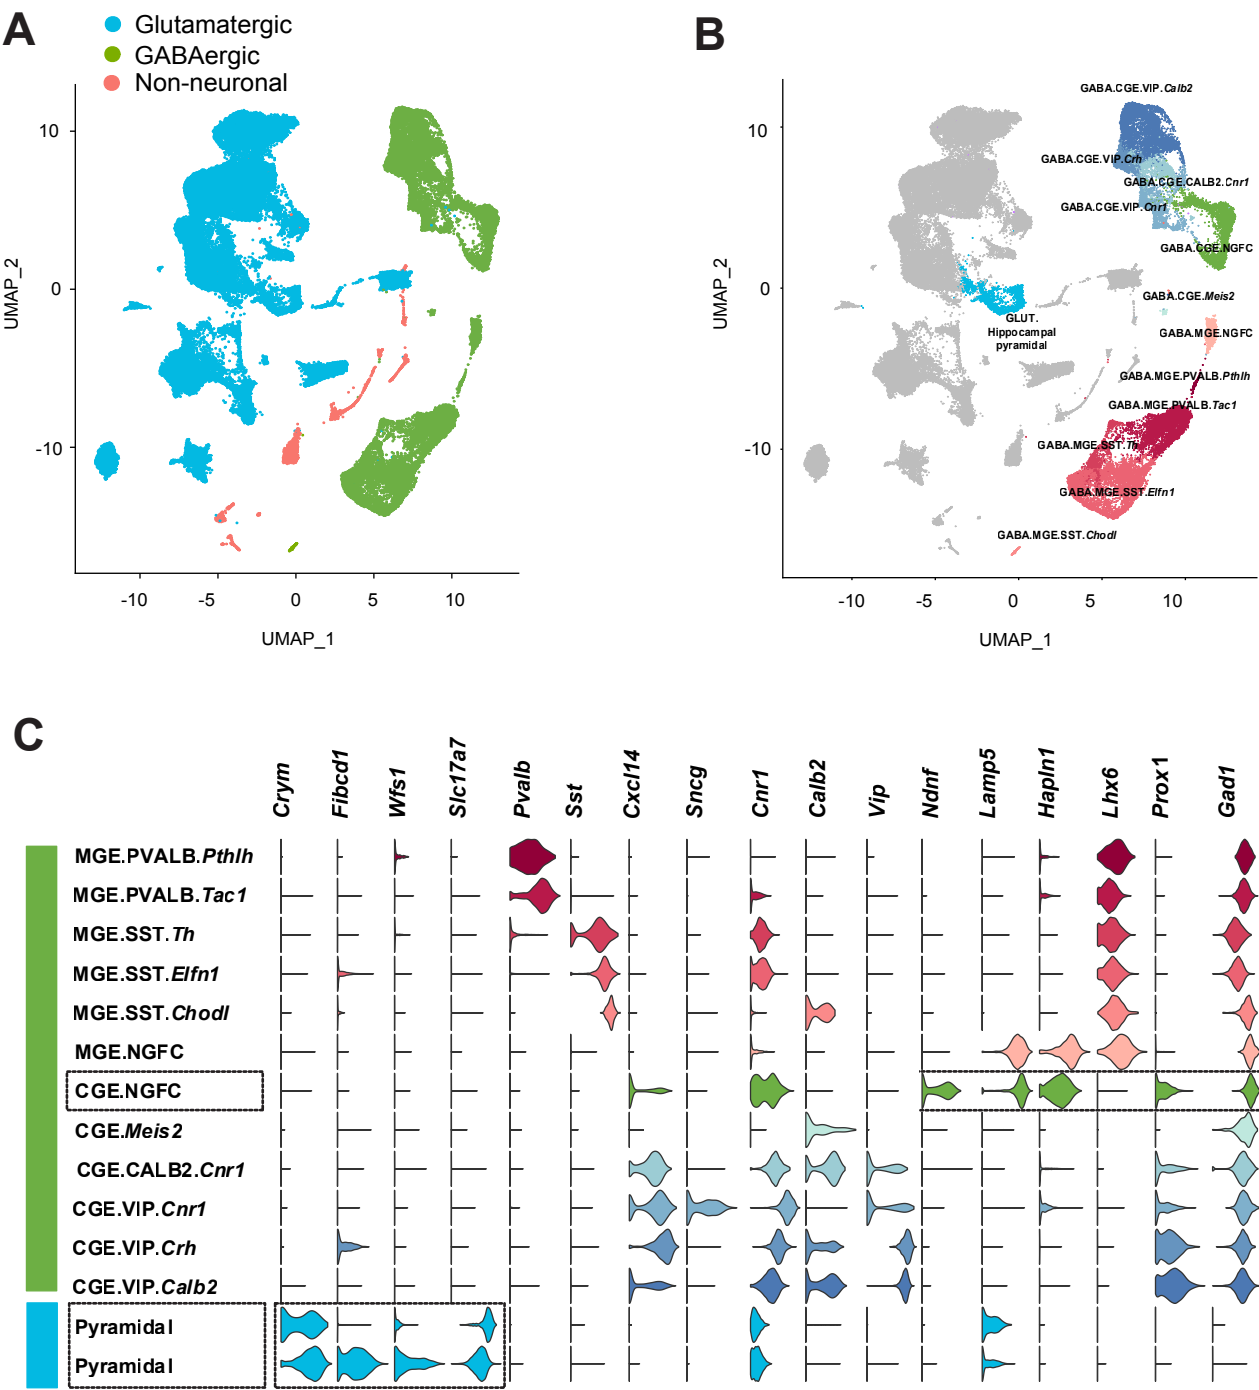

Supplement: supp [file elife-57571-supp-v1.zip]

Figure 7-figure supplement 1

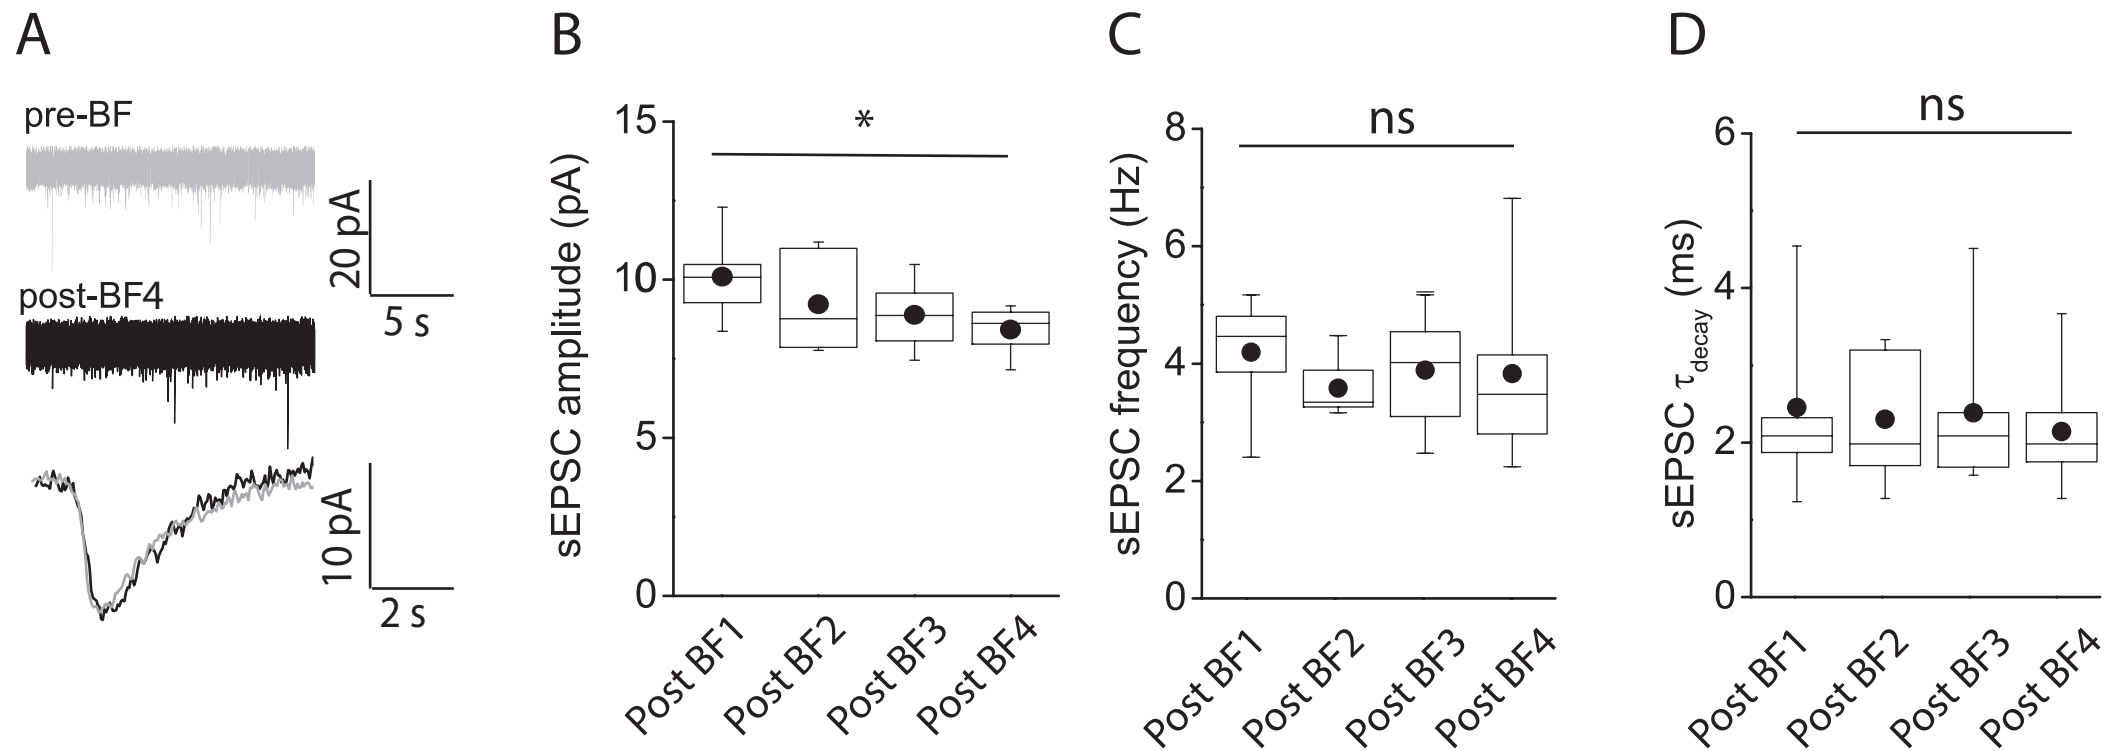

Supplement: supp [file elife-57571-supp-v1.zip]

Figure 6-figure supplement 2

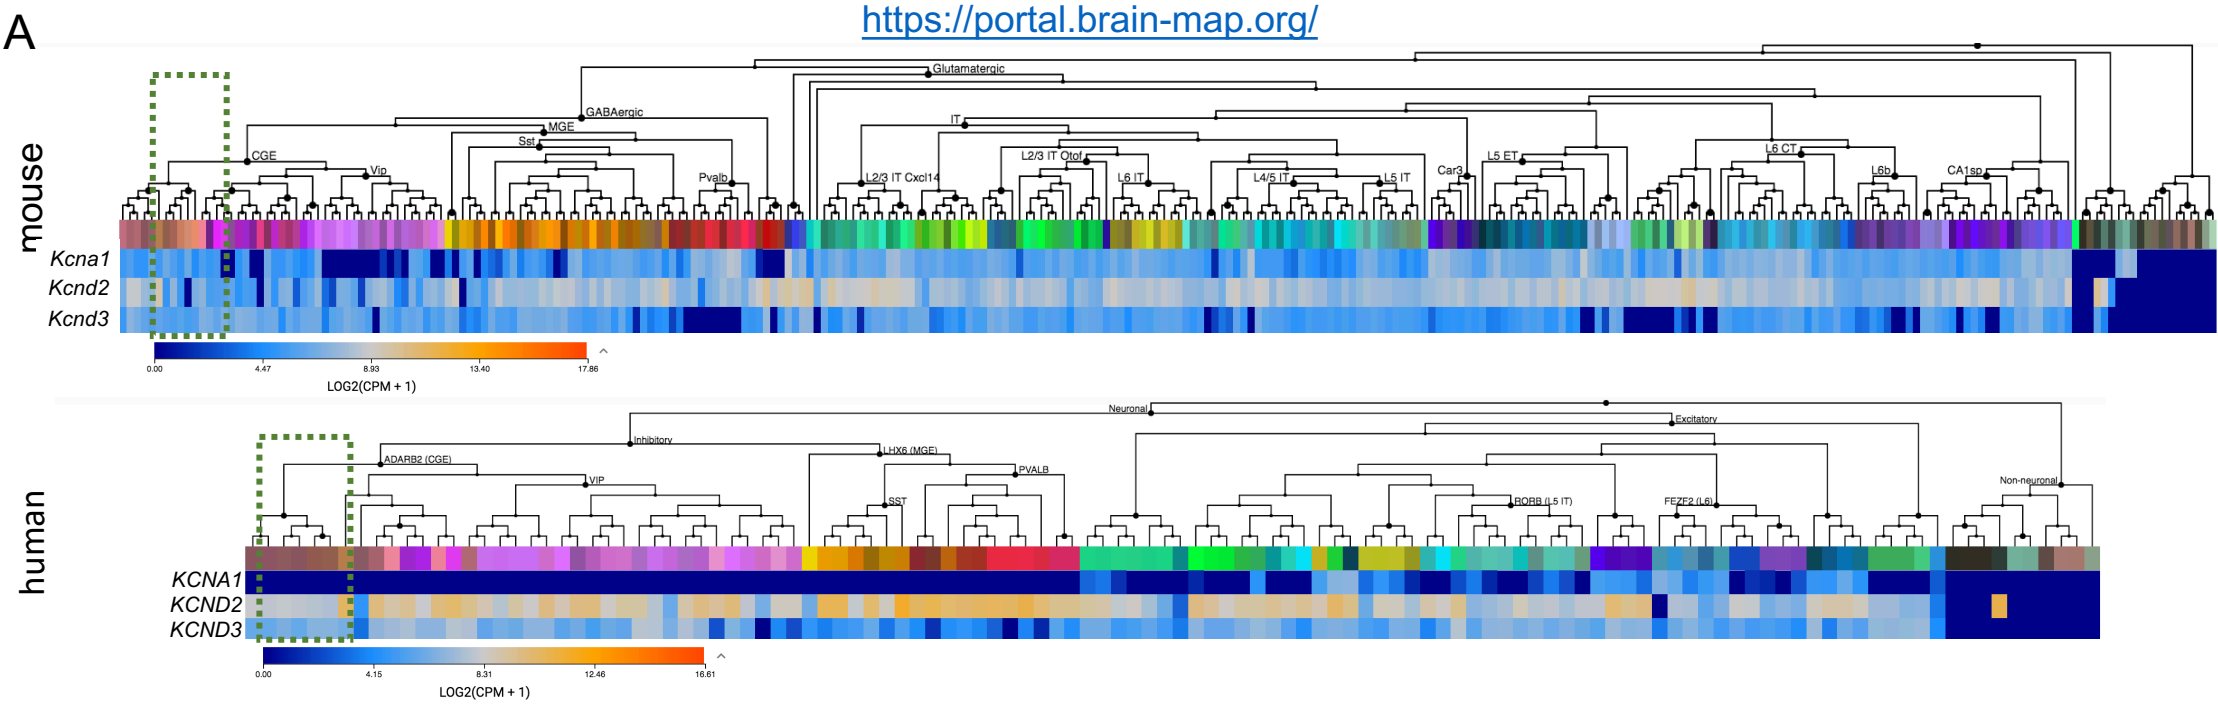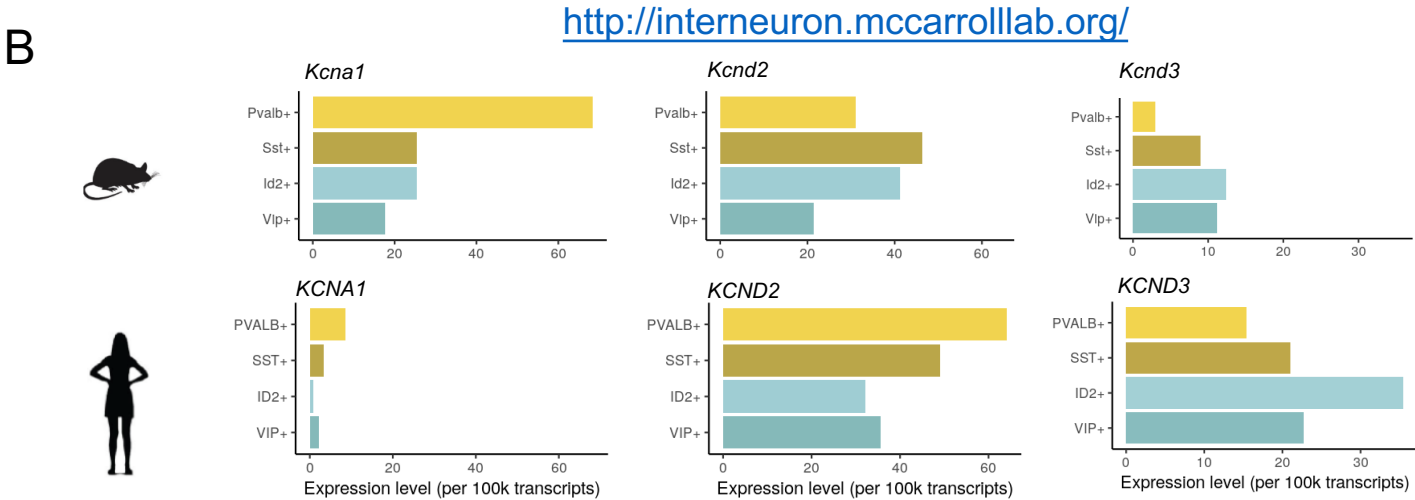

Supplement: supp [file elife-57571-supp-v1.zip]

Figure 1-figure supplement 1

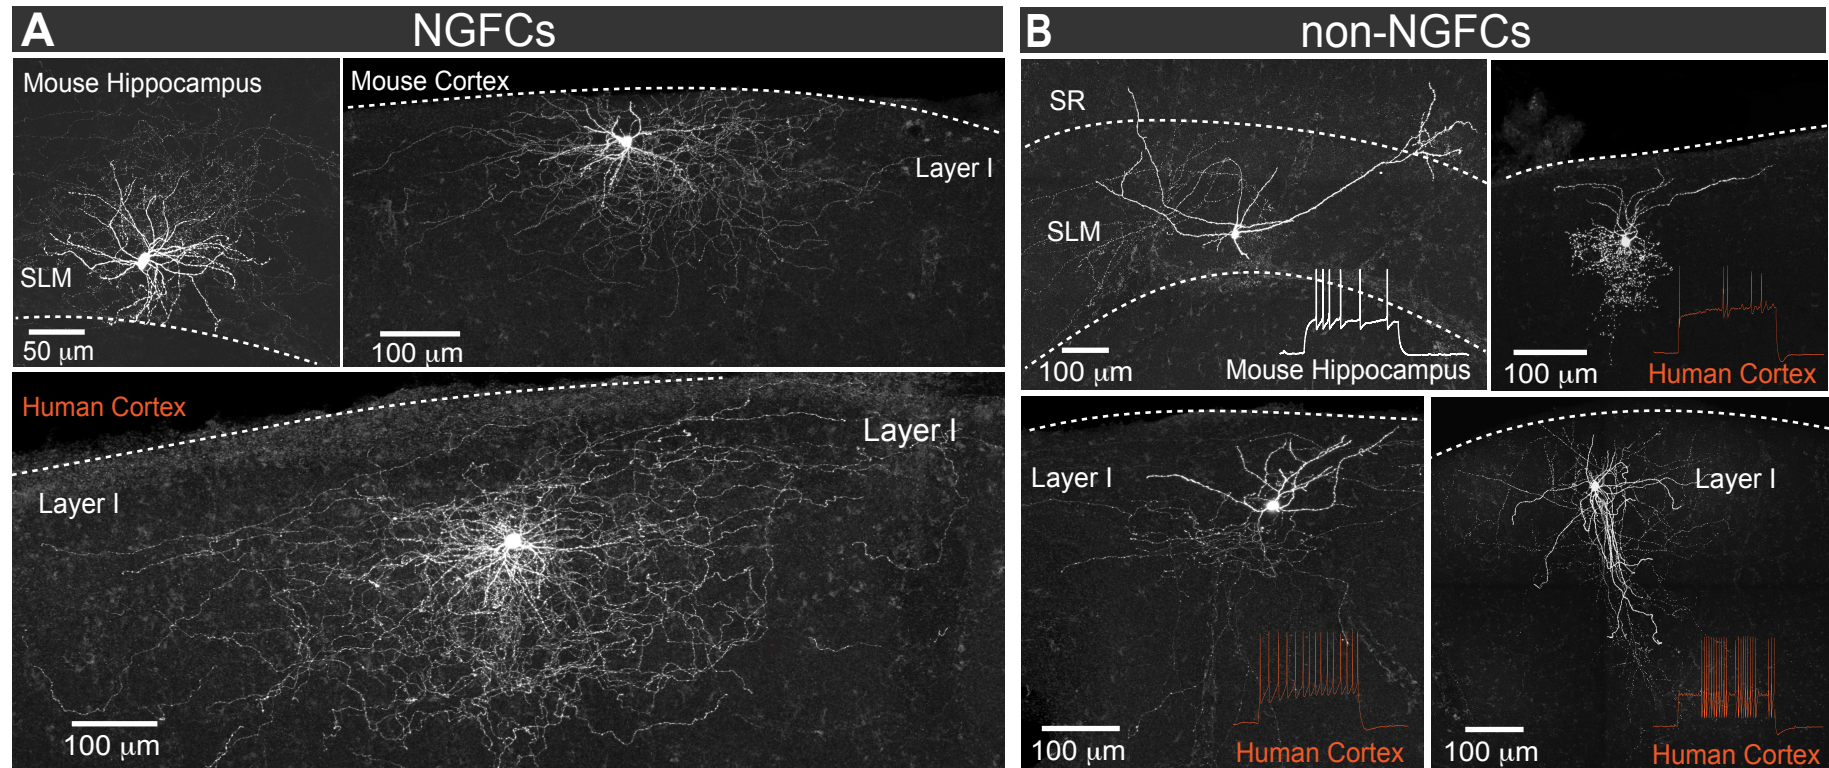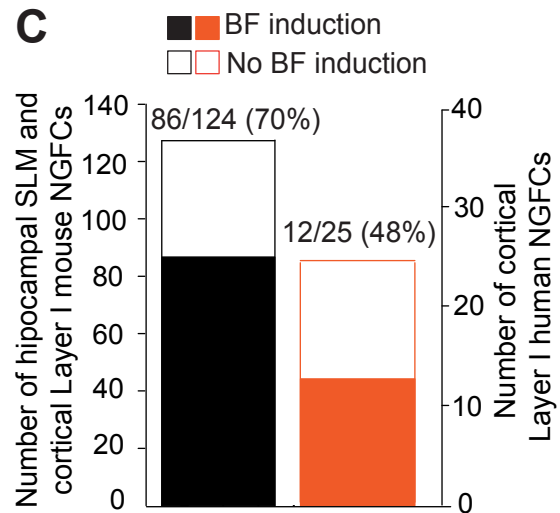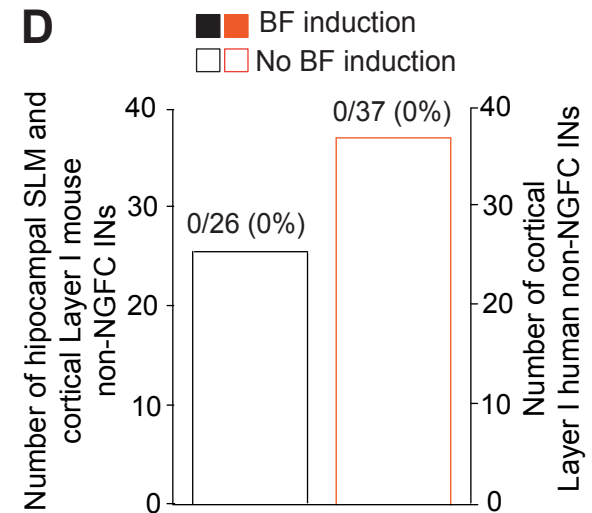

Supplement: supp [file elife-57571-supp-v1.zip]

Figure 1-figure supplement 2

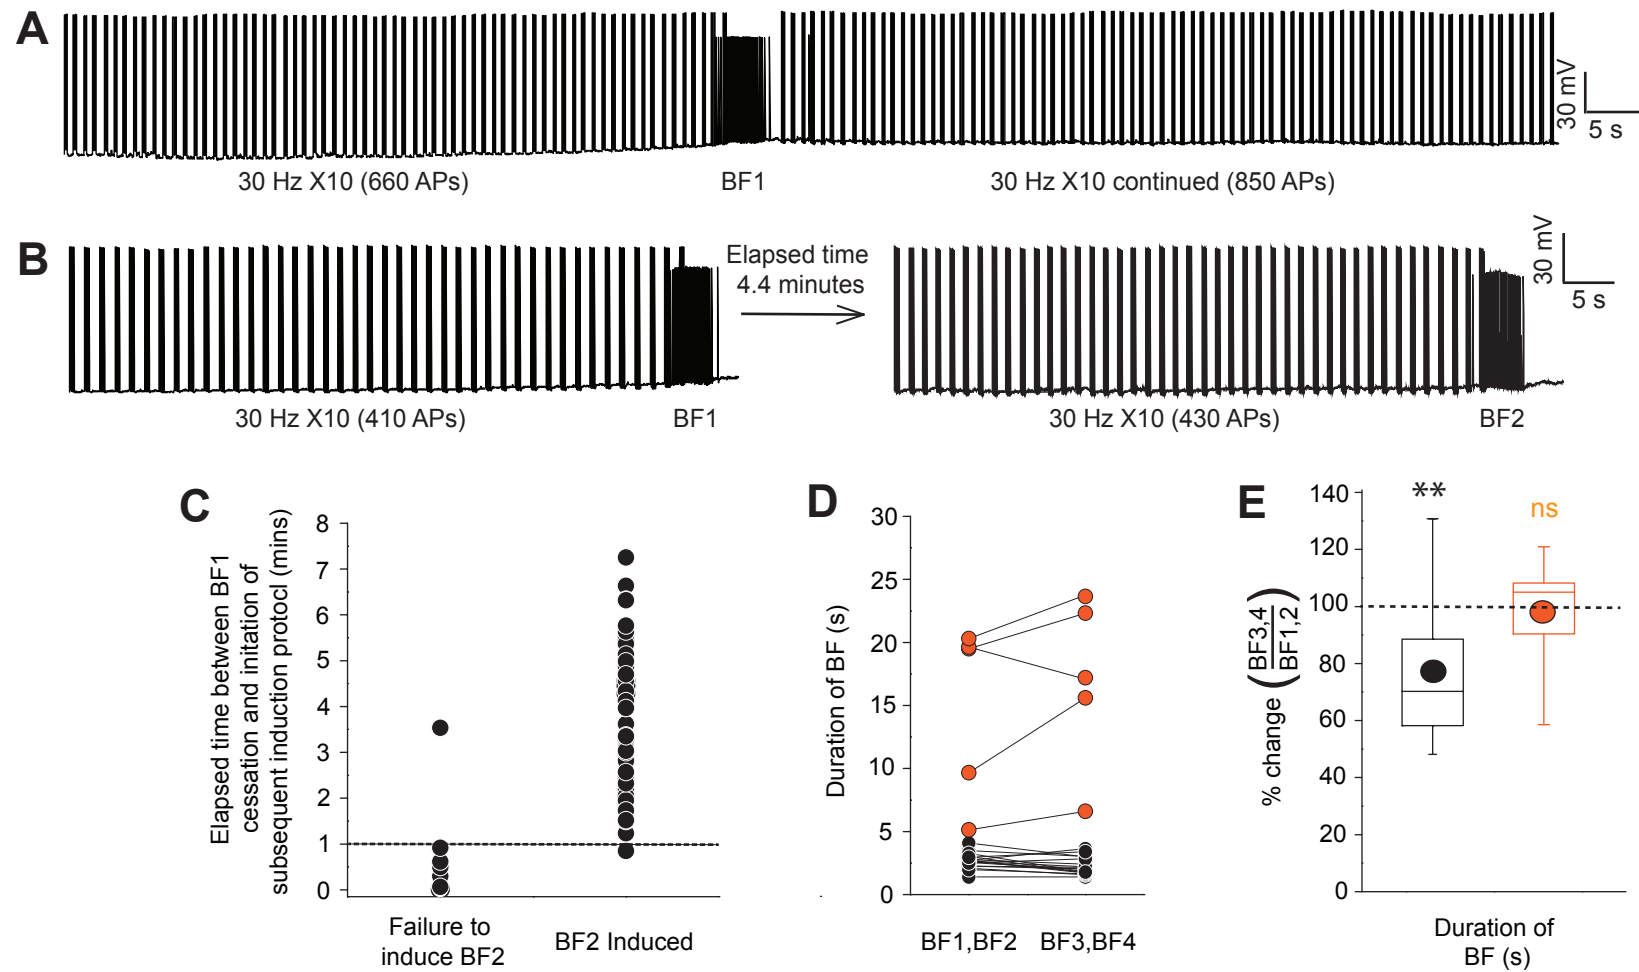

Supplement: supp [file elife-57571-supp-v1.zip]
